# Supplementary material for: Spiroaquilarenes A–E: unprecedented anti-inflammatory sesquiterpene polymers from agarwood of Aquilaria sinensis
Source: Royal Society of Chemistry journal article supplement (doi:10.1039/d2qo00066k), 2022-01-01
Supplement: d2qo00066k1.pdf [file d2qo00066k1.pdf]

**Spiroaquilarenes A–E: unprecedented anti-inflammatory sesquiterpene polymers from agarwood of *Aquilaria sinensis***

Xiao-Ling Huang,<sup>a,b,‡</sup> Yong-Ming Yan,<sup>a,‡</sup> Dai-Wei Wang<sup>a</sup> and Yong-Xian Cheng<sup>a,b,c,\*</sup>

## Contents of Supporting Information

|                                                                                                                                                       |     |
|-------------------------------------------------------------------------------------------------------------------------------------------------------|-----|
| Table S1. $^1\text{H}$ (600 MHz) and $^{13}\text{C}$ NMR (150 MHz) Data of 1 and 2 in pyridine- $d_5$ ( $\delta$ in ppm, $J$ in Hz).....              | 6   |
| Figure S1. Key 2D NMR correlations of 3–5.....                                                                                                        | 6   |
| Figure S2. Calculated and experimental ECD spectra of 3–5.....                                                                                        | 7   |
| Figure S3. Regression analysis of experimental versus calculated $^{13}\text{C}$ NMR chemical shifts of 3a–3d at the mPW1PW91/6-311+G(d,p) level..... | 7   |
| Figure S4. Regression analysis of experimental versus calculated $^{13}\text{C}$ NMR chemical shifts of 4a–4d at the mPW1PW91/6-311+G(d,p) level..... | 8   |
| Figure S5. Regression analysis of experimental versus calculated $^{13}\text{C}$ NMR chemical shifts of 5a–5d at the mPW1PW91/6-311+G(d,p) level..... | 9   |
| Figure S6. Optimized geometries of predominant conformers for 1a at the B3LYP/6-31G (d,p) level.....                                                  | 10  |
| Figure S7. Optimized geometries of predominant conformers for 1b at the B3LYP/6-31G (d,p) level.....                                                  | 11  |
| Figure S8. Optimized geometries of predominant conformers for 1c at the B3LYP/6-31G (d,p) level.....                                                  | 11  |
| Figure S9. Optimized geometries of predominant conformers for 1d at the B3LYP/6-31G (d,p) level.....                                                  | 12  |
| Table S2. Conformational analysis of the optimized 1a-1d at the B3LYP/6-31G(d,p) level in the gas phase.....                                          | 12  |
| Figure S10. DP4+ analysis of experimental NMR data of 1 and unscaled shifts of 1a-1d (Isomer 1-4).....                                                | 17  |
| Table S3. The Cartesian coordinates of the lowest energy conformers for 1a–1d in the gas phase at the B3LYP/6-31G(d,p) level.....                     | 17  |
| Figure S11. Optimized geometries of predominant conformers for 2a at the B3LYP/6-31G (d,p) level.....                                                 | 79  |
| Figure S12. Optimized geometries of predominant conformers for 2b at the B3LYP/6-31G (d,p) level.....                                                 | 80  |
| Figure S13. Optimized geometries of predominant conformers for 2c at the B3LYP/6-31G (d,p) level.....                                                 | 80  |
| Figure S14. Optimized geometries of predominant conformers for 2d at the B3LYP/6-31G (d,p) level.....                                                 | 81  |
| Table S4. Conformational analysis of the optimized 2a-2d at the B3LYP/6-31G(d,p) level in the gas phase.....                                          | 81  |
| Figure S15. DP4+ analysis of experimental NMR data of 2 and unscaled shifts of 2a-2d (Isomer 1-4).....                                                | 84  |
| Table S5. The Cartesian coordinates of the lowest energy conformers for 2a–2d in the gas phase at the B3LYP/6-31G(d,p) level.....                     | 84  |
| Figure S16. Optimized geometries of predominant conformers for 3a at the B3LYP/6-31G (d,p) level.....                                                 | 109 |
| Figure S17. Optimized geometries of predominant conformers for 3b at the B3LYP/6-31G (d,p) level.....                                                 | 110 |
| Figure S18. Optimized geometries of predominant conformers for 3c at the B3LYP/6-31G (d,p) level.....                                                 | 110 |
| Figure S19. Optimized geometries of predominant conformers for 3d at the B3LYP/6-31G (d,p) level.....                                                 | 111 |
| Table S6. Conformational analysis of the optimized 3a-3d at the B3LYP/6-31G(d,p) level in the gas phase.....                                          | 111 |
| Figure S20. DP4+ analysis of experimental NMR data of 3 and unscaled shifts of 3a-3d (Isomer 1-4).....                                                | 116 |
| Table S7. The Cartesian coordinates of the lowest energy conformers for 3a–3d in the gas phase at the B3LYP/6-31G(d,p) level.....                     | 116 |
| Figure S21. Optimized geometries of predominant conformers for 4a at the B3LYP/6-31G (d,p) level.....                                                 | 171 |
| Figure S22. Optimized geometries of predominant conformers for 4b at the B3LYP/6-31G (d,p) level.....                                                 | 172 |
| Figure S23. Optimized geometries of predominant conformers for 4c at the B3LYP/6-31G (d,p) level.....                                                 | 173 |

|                                                                                                                                    |     |
|------------------------------------------------------------------------------------------------------------------------------------|-----|
| Figure S24. Optimized geometries of predominant conformers for 4d at the B3LYP/6-31G (d,p) level.....                              | 173 |
| Table S8. Conformational analysis of the optimized 4a-4d at the B3LYP/6-31G(d,p) level in the gas phase.....                       | 173 |
| Figure S25. DP4+ analysis of experimental NMR data of 4 and unscaled shifts of 4a-4d (Isomer 1-4).....                             | 177 |
| Table S9. The Cartesian coordinates of the lowest energy conformers for 4a-4d in the gas phase at the B3LYP/6-31G(d,p) level.....  | 178 |
| Figure S26. Optimized geometries of predominant conformers for 5a at the B3LYP/6-31G (d,p) level.....                              | 233 |
| Figure S27. Optimized geometries of predominant conformers for 5b at the B3LYP/6-31G (d,p) level.....                              | 234 |
| Figure S28. Optimized geometries of predominant conformers for 5c at the B3LYP/6-31G (d,p) level.....                              | 234 |
| Figure S29. Optimized geometries of predominant conformers for 5d at the B3LYP/6-31G (d,p) level.....                              | 235 |
| Table S10. Conformational analysis of the optimized 5a-5d at the B3LYP/6-31G(d,p) level in the gas phase.....                      | 235 |
| Figure S30. DP4+ analysis of experimental NMR data of 5 and unscaled shifts of 5a-5d (Isomer 1-4).....                             | 238 |
| Table S11. The Cartesian coordinates of the lowest energy conformers for 5a-5d in the gas phase at the B3LYP/6-31G(d,p) level..... | 239 |
| Table S12 DP4+ results obtained for compounds 1- 5.....                                                                            | 282 |
| Figure S31. <sup>1</sup> H NMR (600 MHz) spectrum of 1 in CDCl <sub>3</sub> .....                                                  | 283 |
| Figure S32. <sup>13</sup> C NMR and DEPT (150 MHz) spectra of 1 in CDCl <sub>3</sub> .....                                         | 283 |
| Figure S33. HSQC (600 MHz) spectrum of 1 in CDCl <sub>3</sub> .....                                                                | 284 |
| Figure S34. Enlarged <sup>1</sup> H- <sup>1</sup> H COSY (600 MHz) spectrum of 1 in CDCl <sub>3</sub> .....                        | 284 |
| Figure S35. HSQC (600 MHz) spectrum of 1 in CDCl <sub>3</sub> .....                                                                | 285 |
| Figure S36. Enlarged HSQC (600 MHz) spectrum of 1 in CDCl <sub>3</sub> .....                                                       | 285 |
| Figure S37. HMBC (600 MHz) spectrum of 1 in CDCl <sub>3</sub> .....                                                                | 286 |
| Figure S38. ROESY (600 MHz) spectrum of 1 in CDCl <sub>3</sub> .....                                                               | 286 |
| Figure S39. Enlarged ROESY (600 MHz) spectrum of 1 in CDCl <sub>3</sub> .....                                                      | 287 |
| Figure S40. NOE irradiation spectrum (freq: 3.06 ppm) of compound 1 in CDCl <sub>3</sub> .....                                     | 287 |
| Figure S41. NOE irradiation spectrum (freq: 2.68 ppm) of compound 1 in CDCl <sub>3</sub> .....                                     | 288 |
| Figure S42. <sup>1</sup> H NMR (600 MHz) spectrum of 1 in Pyridine- <i>d</i> <sub>3</sub> .....                                    | 288 |
| Figure S43. <sup>13</sup> C NMR and DEPT (150 MHz) spectra of 1 in pyridine- <i>d</i> <sub>5</sub> .....                           | 289 |
| Figure S44. <sup>1</sup> H- <sup>1</sup> H COSY (600 MHz) spectrum of 1 in pyridine- <i>d</i> <sub>5</sub> .....                   | 289 |
| Figure S45. HSQC (600 MHz) spectrum of 1 in pyridine- <i>d</i> <sub>5</sub> .....                                                  | 290 |
| Figure S46. HMBC (600 MHz) spectrum of 1 in pyridine- <i>d</i> <sub>5</sub> .....                                                  | 290 |
| Figure S47. ROESY (600 MHz) spectrum of 1 in pyridine- <i>d</i> <sub>5</sub> .....                                                 | 291 |
| Figure S48. HRESIMS of 1.....                                                                                                      | 291 |
| Figure S49. <sup>1</sup> H NMR (600 MHz) spectrum of 2 in CDCl <sub>3</sub> .....                                                  | 292 |
| Figure S50. <sup>13</sup> C NMR and DEPT (150 MHz) spectra of 2 in CDCl <sub>3</sub> .....                                         | 292 |
| Figure S51. <sup>1</sup> H- <sup>1</sup> H COSY (600 MHz) spectrum of 2 in CDCl <sub>3</sub> .....                                 | 293 |
| Figure S52. Enlarged <sup>1</sup> H- <sup>1</sup> H COSY (600 MHz) spectrum of 2 in CDCl <sub>3</sub> .....                        | 293 |
| Figure S53. HSQC (600 MHz) spectrum of 2 in CDCl <sub>3</sub> .....                                                                | 294 |
| Figure S54. Enlarged HSQC (600 MHz) spectrum of 2 in CDCl <sub>3</sub> .....                                                       | 294 |
| Figure S55. HMBC (600 MHz) spectrum of 2 in CDCl <sub>3</sub> .....                                                                | 295 |

|                                                                                                                           |     |
|---------------------------------------------------------------------------------------------------------------------------|-----|
| Figure S56. ROESY (600 MHz) spectrum of 2 in CDCl <sub>3</sub> .....                                                      | 295 |
| Figure S57. NOE irradiation spectrum (freq: 1.06 ppm) of compound 2 in CDCl <sub>3</sub> .....                            | 296 |
| Figure S58. NOE irradiation spectrum (freq: 5.09 ppm) of compound 2 in CDCl <sub>3</sub> .....                            | 296 |
| Figure S60. <sup>13</sup> C NMR and DEPT (150 MHz) spectra of 2 in pyridine- <i>d</i> <sub>5</sub> .....                  | 297 |
| Figure S61. <sup>1</sup> H- <sup>1</sup> H COSY (600 MHz) spectrum of 2 in pyridine- <i>d</i> <sub>5</sub> .....          | 298 |
| Figure S62. HSQC (600 MHz) spectrum of 2 in pyridine- <i>d</i> <sub>5</sub> .....                                         | 298 |
| Figure S63. HMBC (600 MHz) spectrum of 2 in pyridine- <i>d</i> <sub>5</sub> .....                                         | 299 |
| Figure S64. ROESY (600 MHz) spectrum of 2 in pyridine- <i>d</i> <sub>5</sub> .....                                        | 299 |
| Figure S65. HRESIMS of 2.....                                                                                             | 300 |
| Figure S66. <sup>1</sup> H NMR (600 MHz) spectrum of 3 in pyridine- <i>d</i> <sub>5</sub> .....                           | 300 |
| Figure S67. <sup>13</sup> C NMR and DEPT (150 MHz) spectra of 3 in pyridine- <i>d</i> <sub>5</sub> .....                  | 301 |
| Figure S68. <sup>1</sup> H- <sup>1</sup> H COSY (600 MHz) spectrum of 3 in pyridine- <i>d</i> <sub>5</sub> .....          | 301 |
| Figure S69. Enlarged <sup>1</sup> H- <sup>1</sup> H COSY (600 MHz) spectrum of 3 in pyridine- <i>d</i> <sub>5</sub> ..... | 302 |
| Figure S70. HSQC (600 MHz) spectrum of 3 in pyridine- <i>d</i> <sub>5</sub> .....                                         | 302 |
| Figure S71. Enlarged HSQC (600 MHz) spectrum of 3 in pyridine- <i>d</i> <sub>5</sub> .....                                | 303 |
| Figure S72. HMBC (600 MHz) spectrum of 3 in pyridine- <i>d</i> <sub>5</sub> .....                                         | 303 |
| Figure S73. ROESY (600 MHz) spectrum of 3 in pyridine- <i>d</i> <sub>5</sub> .....                                        | 304 |
| Figure S74. Enlarged ROESY (600 MHz) spectrum of 3 in pyridine- <i>d</i> <sub>5</sub> .....                               | 304 |
| Figure S75. Enlarged ROESY (600 MHz) spectrum of 3 in pyridine- <i>d</i> <sub>5</sub> .....                               | 305 |
| Figure S76. HRESIMS of 3.....                                                                                             | 305 |
| Figure S77. <sup>1</sup> H NMR (600 MHz) spectrum of 4 in pyridine- <i>d</i> <sub>5</sub> .....                           | 306 |
| Figure S78. <sup>13</sup> C NMR and DEPT (150 MHz) spectra of 4 in pyridine- <i>d</i> <sub>5</sub> .....                  | 306 |
| Figure S79. <sup>1</sup> H- <sup>1</sup> H COSY (600 MHz) spectrum of 4 in pyridine- <i>d</i> <sub>5</sub> .....          | 307 |
| Figure S80. Enlarged <sup>1</sup> H- <sup>1</sup> H COSY (600 MHz) spectrum of 4 in pyridine- <i>d</i> <sub>5</sub> ..... | 307 |
| Figure S81. HSQC (600 MHz) spectrum of 4 in pyridine- <i>d</i> <sub>5</sub> .....                                         | 308 |
| Figure S82. Enlarged HSQC (600 MHz) spectrum of 4 in pyridine- <i>d</i> <sub>5</sub> .....                                | 308 |
| Figure S83. HMBC (600 MHz) spectrum of 4 in pyridine- <i>d</i> <sub>5</sub> .....                                         | 309 |
| Figure S84. ROESY (600 MHz) spectrum of 4 in pyridine- <i>d</i> <sub>5</sub> .....                                        | 309 |
| Figure S85. Enlarged ROESY (600 MHz) spectrum of 4 in pyridine- <i>d</i> <sub>5</sub> .....                               | 310 |
| Figure S86. Enlarged ROESY (600 MHz) spectrum of 4 in pyridine- <i>d</i> <sub>5</sub> .....                               | 310 |
| Figure S87. HRESIMS of 4.....                                                                                             | 311 |
| Figure S88. <sup>1</sup> H NMR (600 MHz) spectrum of 5 in pyridine- <i>d</i> <sub>5</sub> .....                           | 311 |
| Figure S89. <sup>13</sup> C NMR and DEPT (150 MHz) spectra of 5 in pyridine- <i>d</i> <sub>5</sub> .....                  | 312 |
| Figure S90. <sup>1</sup> H- <sup>1</sup> H COSY (600 MHz) spectrum of 5 in pyridine- <i>d</i> <sub>5</sub> .....          | 312 |
| Figure S91. Enlarged <sup>1</sup> H- <sup>1</sup> H COSY (600 MHz) spectrum of 5 in pyridine- <i>d</i> <sub>5</sub> ..... | 313 |
| Figure S92. HSQC (600 MHz) spectrum of 5 in pyridine- <i>d</i> <sub>5</sub> .....                                         | 313 |
| Figure S93. Enlarged HSQC (600 MHz) spectrum of 5 in pyridine- <i>d</i> <sub>5</sub> .....                                | 314 |
| Figure S94. HMBC (600 MHz) spectrum of 5 in pyridine- <i>d</i> <sub>5</sub> .....                                         | 314 |
| Figure S95. ROESY (600 MHz) spectrum of 5 in pyridine- <i>d</i> <sub>5</sub> .....                                        | 315 |

|                                                                                                                                                                                 |     |
|---------------------------------------------------------------------------------------------------------------------------------------------------------------------------------|-----|
| Figure S96. Enlarged ROESY (600 MHz) spectrum of 5 in pyridine- <i>d</i> <sub>5</sub> .....                                                                                     | 315 |
| Figure S97. Enlarged ROESY (600 MHz) spectrum of 5 in pyridine- <i>d</i> <sub>5</sub> .....                                                                                     | 316 |
| Figure S98. HRESIMS of 5.....                                                                                                                                                   | 316 |
| Figure S99. The UV spectrum of 1.....                                                                                                                                           | 317 |
| Figure S100. The UV spectrum of 2.....                                                                                                                                          | 317 |
| Figure S101. The UV spectrum of 3.....                                                                                                                                          | 317 |
| Figure S102. The UV spectrum of 4.....                                                                                                                                          | 318 |
| Figure S103. The UV spectrum of 5.....                                                                                                                                          | 318 |
| Biological Assays.....                                                                                                                                                          | 318 |
| Cell culture.....                                                                                                                                                               | 318 |
| Cell viability assay.....                                                                                                                                                       | 318 |
| ELISA of TNF- $\alpha$ and IL-6.....                                                                                                                                            | 319 |
| Determination of nitrite oxide.....                                                                                                                                             | 319 |
| Western blot.....                                                                                                                                                               | 319 |
| Statistical analysis.....                                                                                                                                                       | 319 |
| Figure S104. The chiral HPLC analysis of 1 by Lux Cellulose-1 column. (250 mm $\times$ 4.6 mm, i.d., 5 $\mu$ m) Analysis condition: aqueous MeCN 75% (flow rate: 1 mL/min)..... | 320 |
| Figure S105. The chiral HPLC analysis of 2 by Lux Cellulose-1 column. (250 mm $\times$ 4.6 mm, i.d., 5 $\mu$ m) Analysis condition: aqueous MeCN 75% (flow rate: 1 mL/min)..... | 320 |
| Figure S106. The chiral HPLC analysis of 3 by Lux Cellulose-1 column. (250 mm $\times$ 4.6 mm, i.d., 5 $\mu$ m) Analysis condition: aqueous MeCN 80% (flow rate: 1 mL/min)..... | 320 |
| Figure S107. The chiral HPLC analysis of 4 by Lux Cellulose-1 column. (250 mm $\times$ 4.6 mm, i.d., 5 $\mu$ m) Analysis condition: aqueous MeCN 80% (flow rate: 1 mL/min)..... | 320 |
| Figure S108. The chiral HPLC analysis of 5 by Lux Cellulose-1 column. (250 mm $\times$ 4.6 mm, i.d., 5 $\mu$ m) Analysis condition: aqueous MeCN 80% (flow rate: 1 mL/min)..... | 321 |

**Table S1.**  $^1\text{H}$  (600 MHz) and  $^{13}\text{C}$  NMR (150 MHz) Data of **1** and **2** in pyridine- $d_5$  ( $\delta$  in ppm,  $J$  in Hz)

|      |                                                      | <b>1</b>              |                                                      | <b>2</b>              |  |
|------|------------------------------------------------------|-----------------------|------------------------------------------------------|-----------------------|--|
| no   | $\delta_{\text{H}}$                                  | $\delta_{\text{C}}$   | $\delta_{\text{H}}$                                  | $\delta_{\text{C}}$   |  |
| 1    | Ha: 2.11, <b>m</b><br>Hb: 1.07, <b>overlap</b>       | 34.1, t               | Ha: 2.02, <b>m</b><br>Hb: 1.28, <b>overlap</b>       | 36.6, t               |  |
| 2    | Ha: 1.93, <b>m</b><br>Hb: 1.50, m                    | 18.3 <sup>a</sup> , t | Ha: 1.91, <b>m</b><br>Hb: 1.52, <b>overlap</b>       | 18.4 <sup>b</sup> , t |  |
| 3    | Ha: 2.46, <b>overlap</b><br>Hb: 1.46, <b>overlap</b> | 31.1, t               | Ha: 2.33, dt (13.3, 3.7)<br>Hb: 1.45, <b>overlap</b> | 32.9, t               |  |
| 4    |                                                      | 92.3, s               |                                                      | 93.3, s               |  |
| 5    |                                                      | 75.9, s               |                                                      | 75.0, s               |  |
| 6    | Ha: 2.06, t-like (12.8)<br>Hb: 1.38, <b>m</b>        | 32.8, t               | Ha: 1.65, <b>m</b><br>Hb: 1.62, <b>m</b>             | 39.7 <sup>c</sup> , t |  |
| 7    | 3.39, m                                              | 33.3, d               | 3.03, m                                              | 32.5, d               |  |
| 8    | Ha: 1.76, dt (13.3, 4.1)<br>Hb: 1.58, m              | 26.8, t               | Ha: 1.59, <b>m</b><br>Hb: 1.50, <b>overlap</b>       | 26.0, t               |  |
| 9    | Ha: 2.22, <b>m</b><br>Hb: 1.06, <b>overlap</b>       | 36.8, t               | Ha: 2.42, <b>m</b><br>Hb: 1.14, <b>m</b>             | 33.2, t               |  |
| 10   |                                                      | 36.9, s               |                                                      | 38.0, s               |  |
| 11   |                                                      | 154.9, s              |                                                      | 155.1, s              |  |
| 12   | Ha: 6.18, s<br>Hb: 5.85, s                           | 134.4, t              | Ha: 6.10, s<br>Hb: 5.86, s                           | 133.7, t              |  |
| 13   | 9.53, s                                              | 195.1, d              | 9.42, s                                              | 195.3, d              |  |
| 14   |                                                      | 209.9, s              |                                                      | 210.7, s              |  |
| 15   | 1.37, s                                              | 20.8, q               | 1.20, s                                              | 23.8, q               |  |
| 1'   | Ha: 1.44, <b>overlap</b><br>Hb: 1.25, m              | 39.7, t               | Ha: 1.46, <b>overlap</b><br>Hb: 1.28, <b>overlap</b> | 39.7 <sup>c</sup> , t |  |
| 2'   | Ha: 1.54, m<br>Hb: 1.45, <b>overlap</b>              | 18.3 <sup>a</sup> , t | Ha: 1.52, <b>overlap</b><br>Hb: 1.52, <b>overlap</b> | 18.3 <sup>b</sup> , t |  |
| 3'   | Ha: 2.47, <b>overlap</b><br>Hb: 2.18, <b>m</b>       | 24.7, t               | Ha: 2.52, <b>m</b><br>Hb: 2.18, <b>m</b>             | 24.7, t               |  |
| 4'   |                                                      | 134.3, s              |                                                      | 134.5, s              |  |
| 5'   |                                                      | 160.1, s              |                                                      | 160.4, s              |  |
| 6'   | Ha: 3.76, dd (13.9, 3.7)<br>Hb: 2.39, t-like (13.9)  | 27.0, t               | Ha: 4.08, brd (13.9)<br>Hb: 2.45, <b>m</b>           | 26.8, t               |  |
| 7'   | 2.70, m                                              | 41.7, d               | 2.70, m                                              | 42.1, d               |  |
| 8'   | 1.90, <b>m</b>                                       | 26.0, t               | Ha: 2.05, <b>m</b><br>Hb: 1.85, <b>m</b>             | 26.5, t               |  |
| 9'   | Ha: 1.60, <b>m</b><br>Hb: 1.44, <b>overlap</b>       | 40.9, t               | Ha: 1.68, <b>m</b><br>Hb: 1.50, <b>overlap</b>       | 41.1, t               |  |
| 10'  |                                                      | 37.6, s               |                                                      | 37.0, s               |  |
| 11'  |                                                      | 196.2, s              |                                                      | 197.1, s              |  |
| 12'  | 5.75, s                                              | 102.4, d              | 5.91, s                                              | 102.5, d              |  |
| 13'  | 10.43, s                                             | 191.0, d              | 10.62, s                                             | 191.5, d              |  |
| 14'  | 1.12, s                                              | 25.0, q               | 1.17, s                                              | 25.1, q               |  |
| 5-OH | 5.04, brs                                            |                       | 5.67, brs                                            |                       |  |

<sup>a, b, c</sup> Signals with the same symbol might be interchangeable.

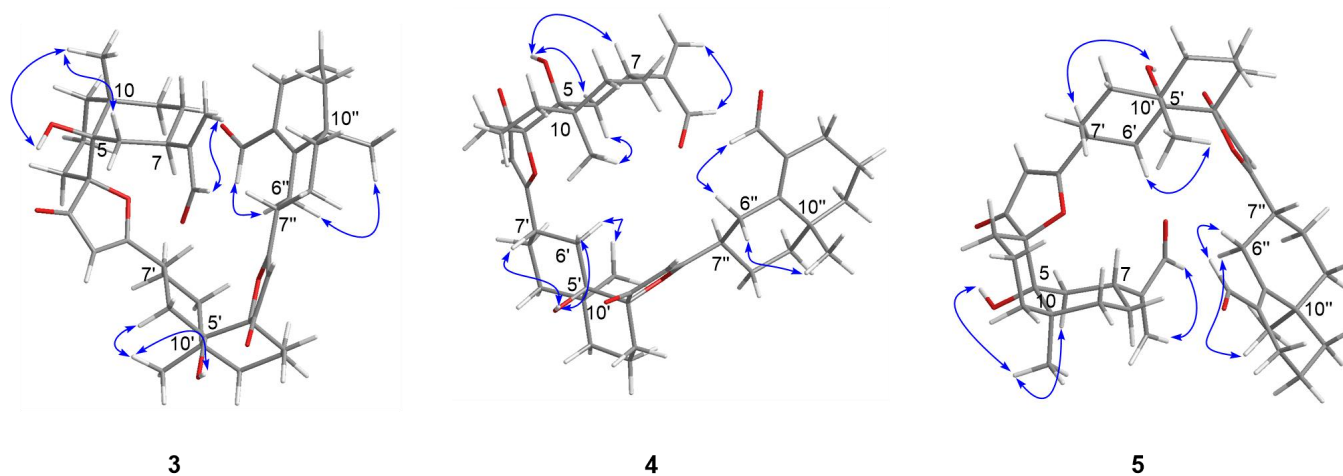**Figure S1.** Key 2D NMR correlations of **3–5**.

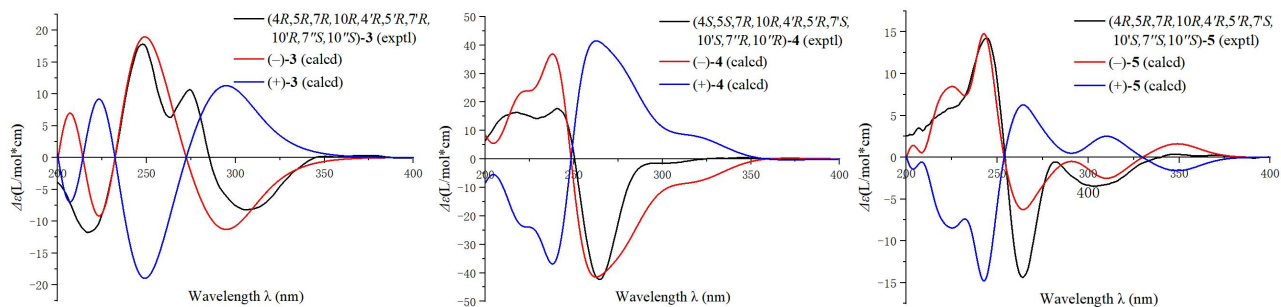

**Figure S2.** Calculated and experimental ECD spectra of **3–5**.

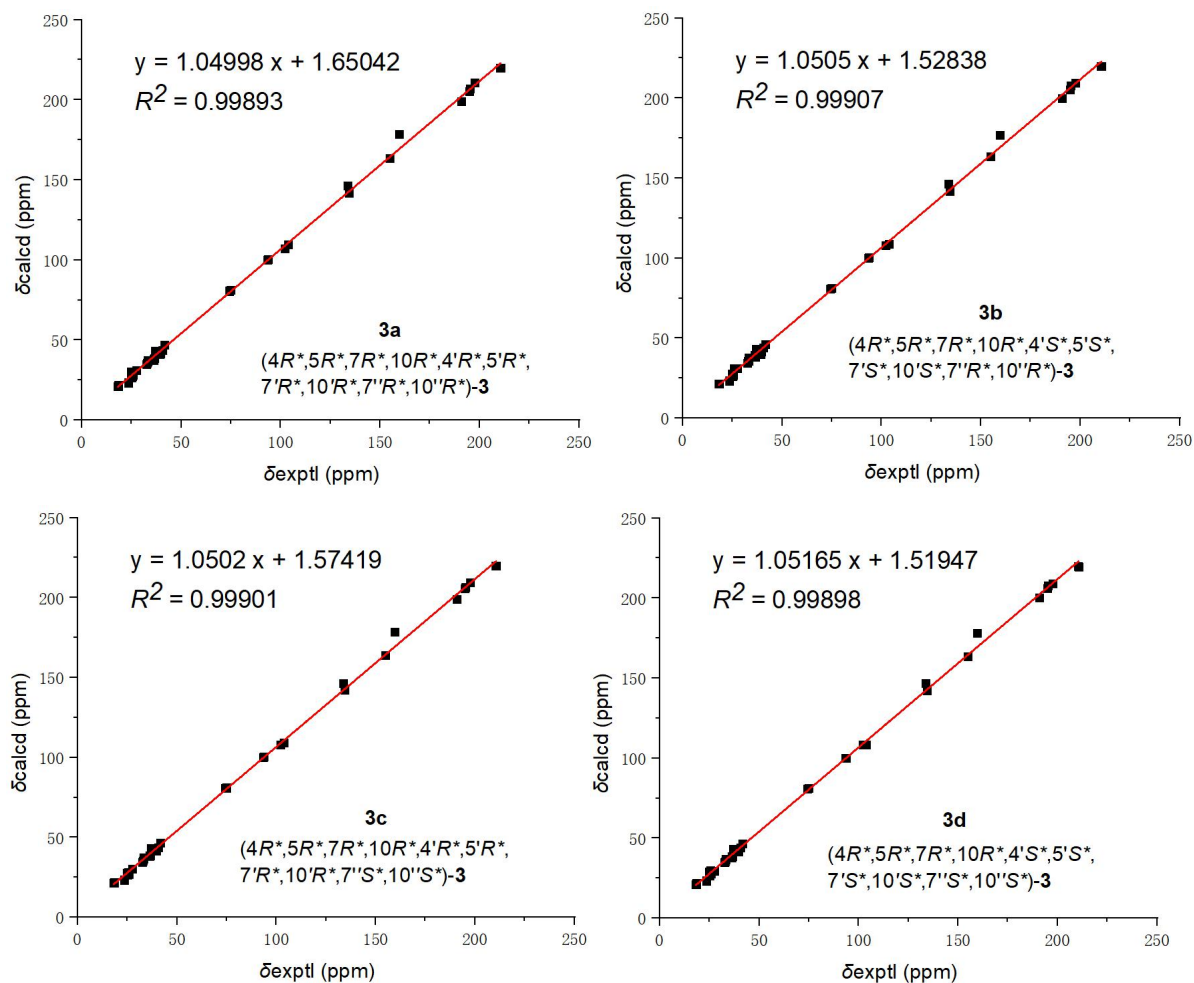

**Figure S3.** Regression analysis of experimental versus calculated  $^{13}\text{C}$  NMR chemical shifts of **3a–3d** at the mPW1PW91/6-311+G(d,p) level

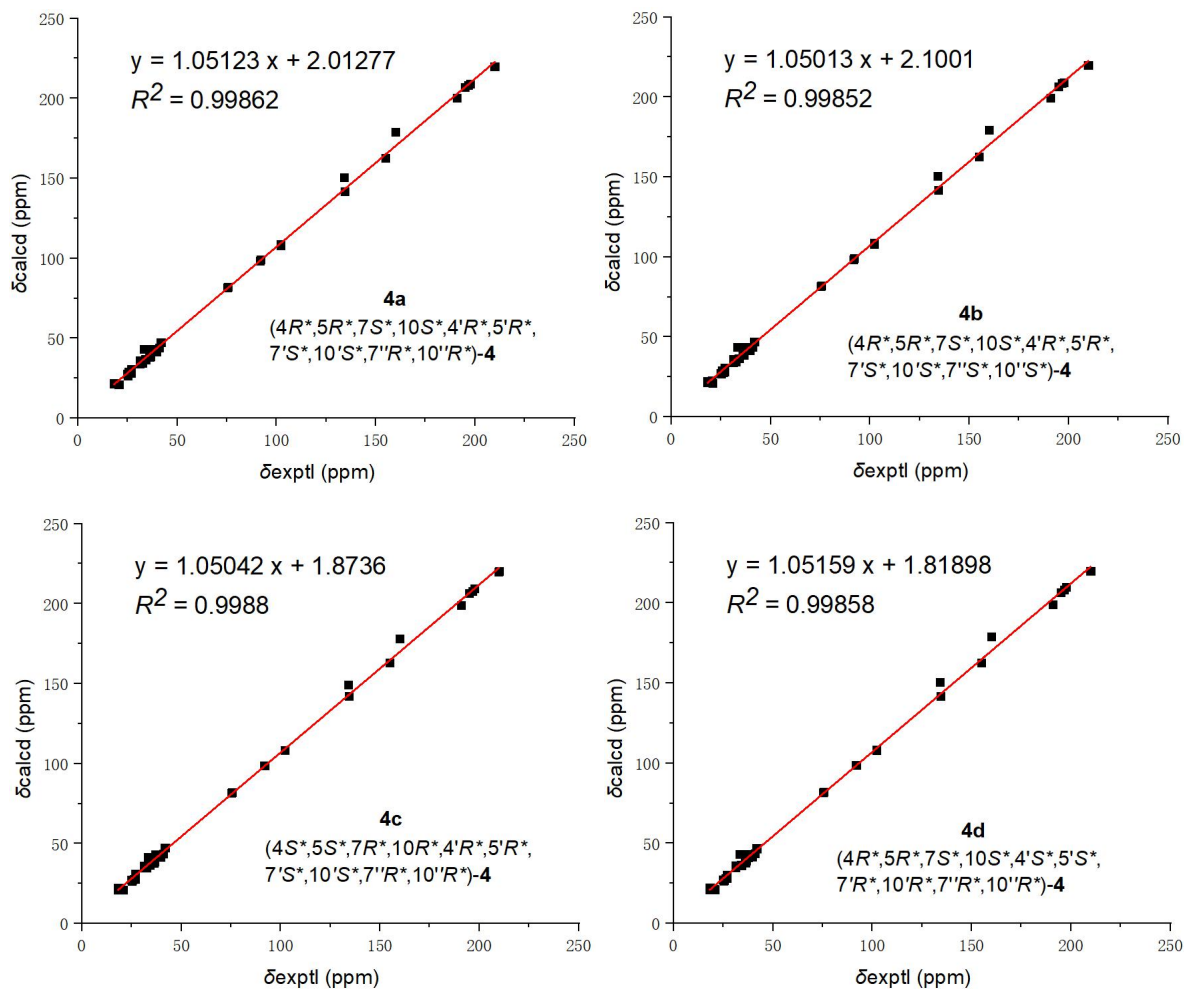

**Figure S4.** Regression analysis of experimental versus calculated  $^{13}\text{C}$  NMR chemical shifts of **4a–4d** at the mPW1PW91/6-311+G(d,p) level

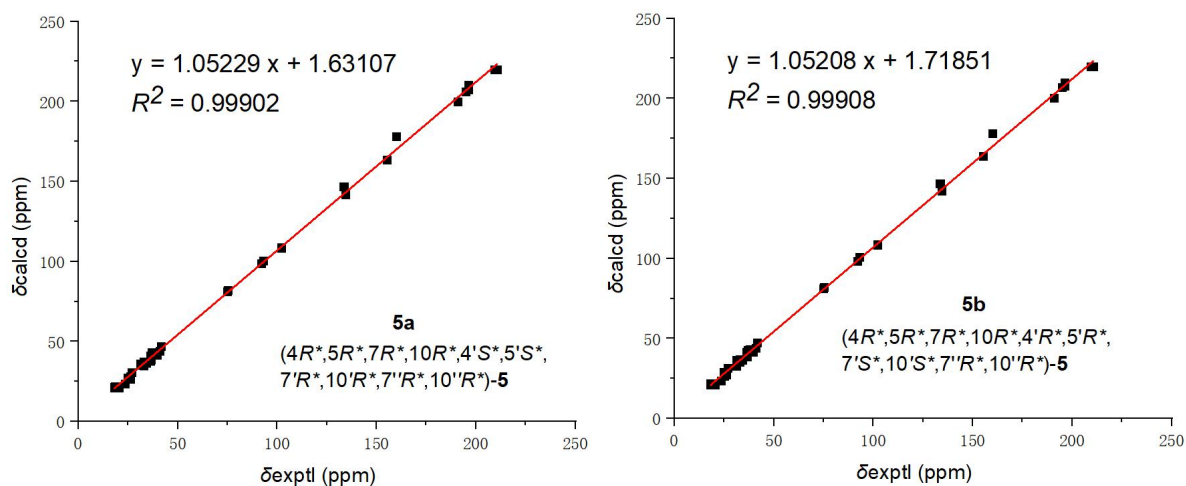



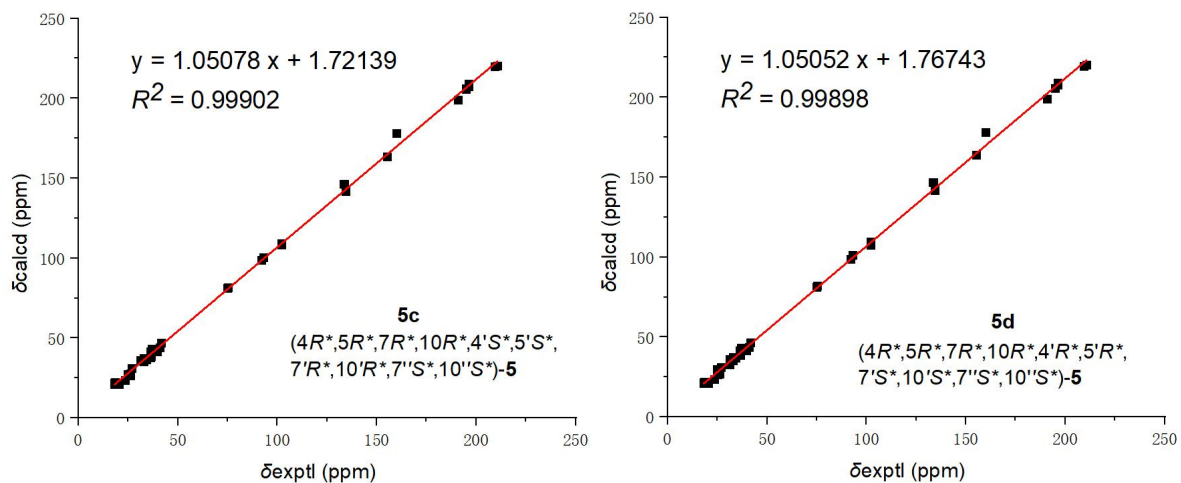

**Figure S5.** Regression analysis of experimental versus calculated  $^{13}\text{C}$  NMR chemical shifts of **5a–5d** at the mPW1PW91/6-311+G(d,p) level

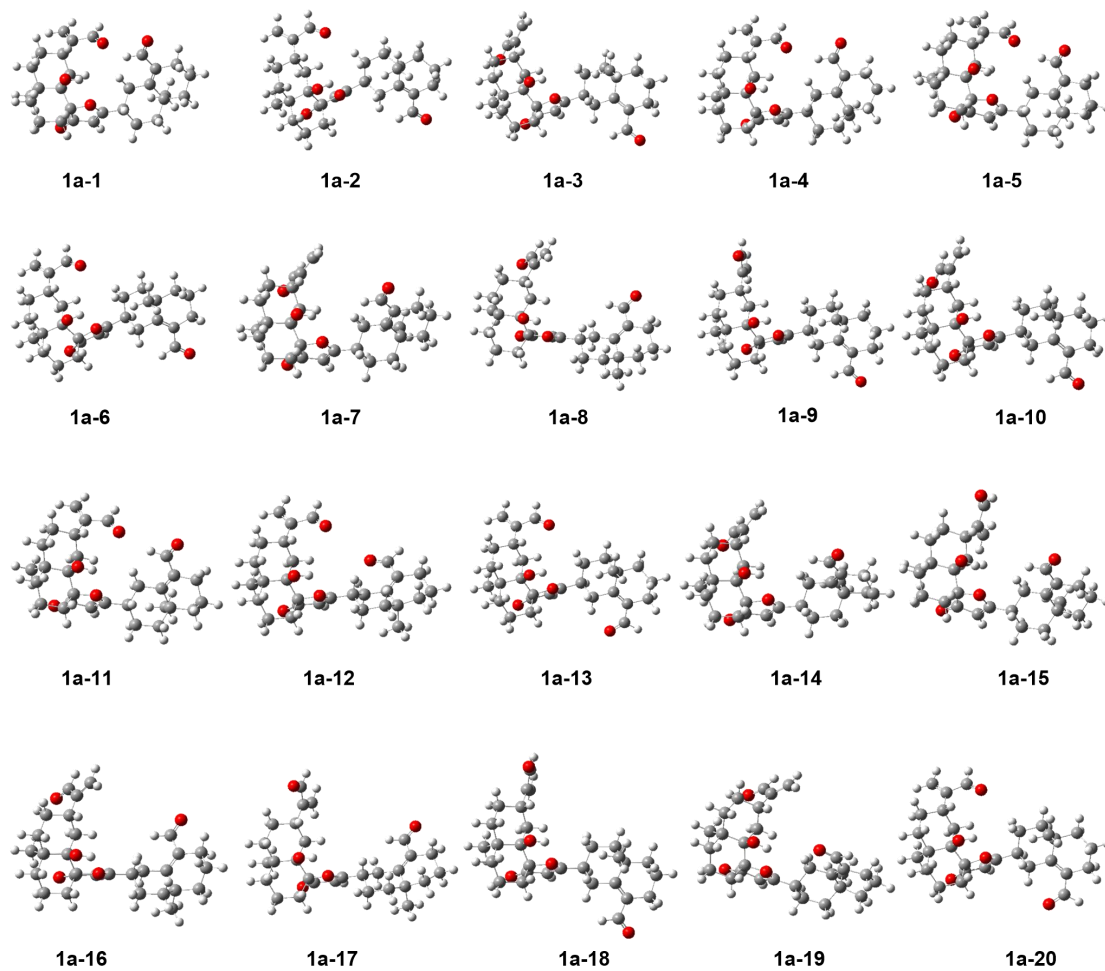

**Figure S6.** Optimized geometries of predominant conformers for **1a** at the B3LYP/6-31G (d,p) level

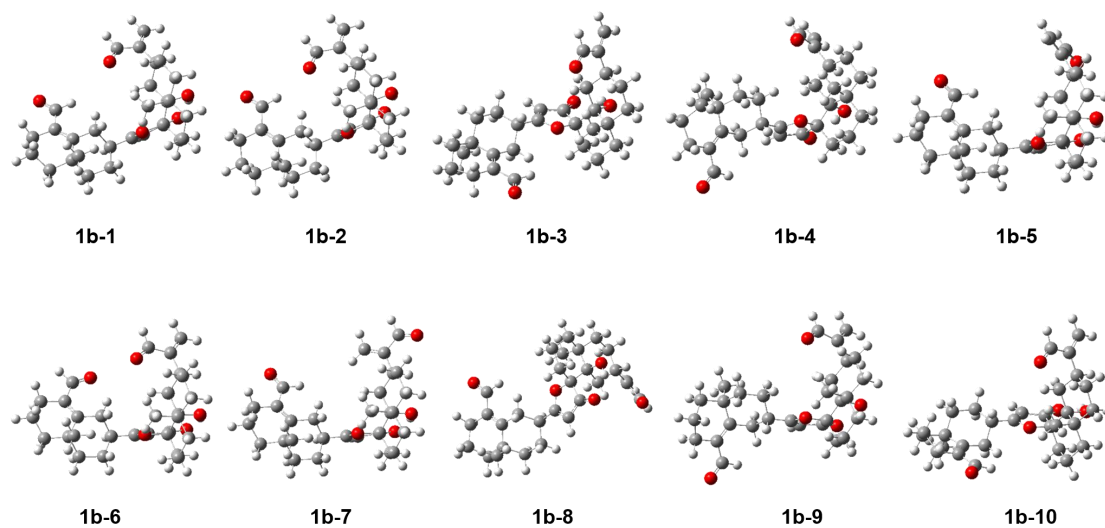

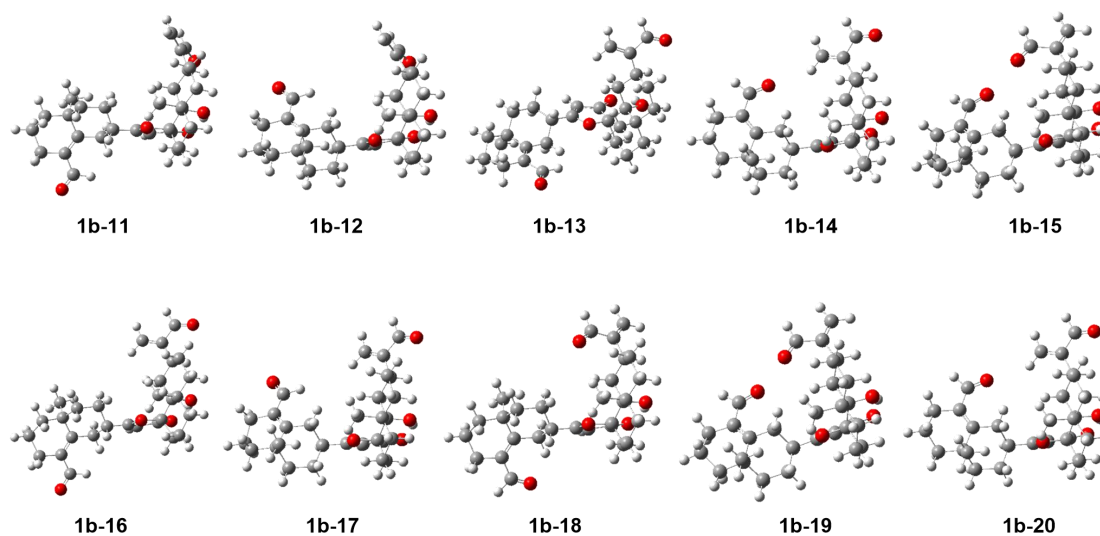

**Figure S7.** Optimized geometries of predominant conformers for **1b** at the B3LYP/6-31G (d,p) level

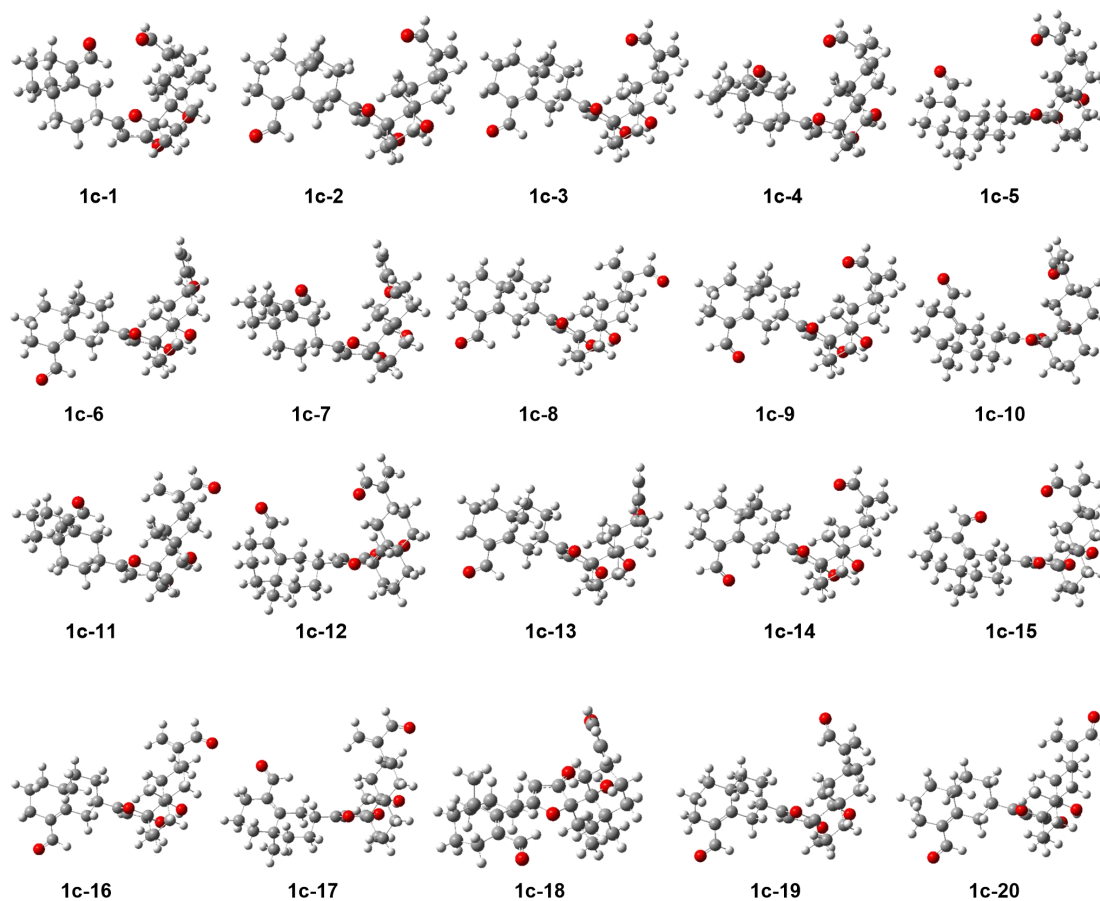

**Figure S8.** Optimized geometries of predominant conformers for **1c** at the B3LYP/6-31G (d,p) level

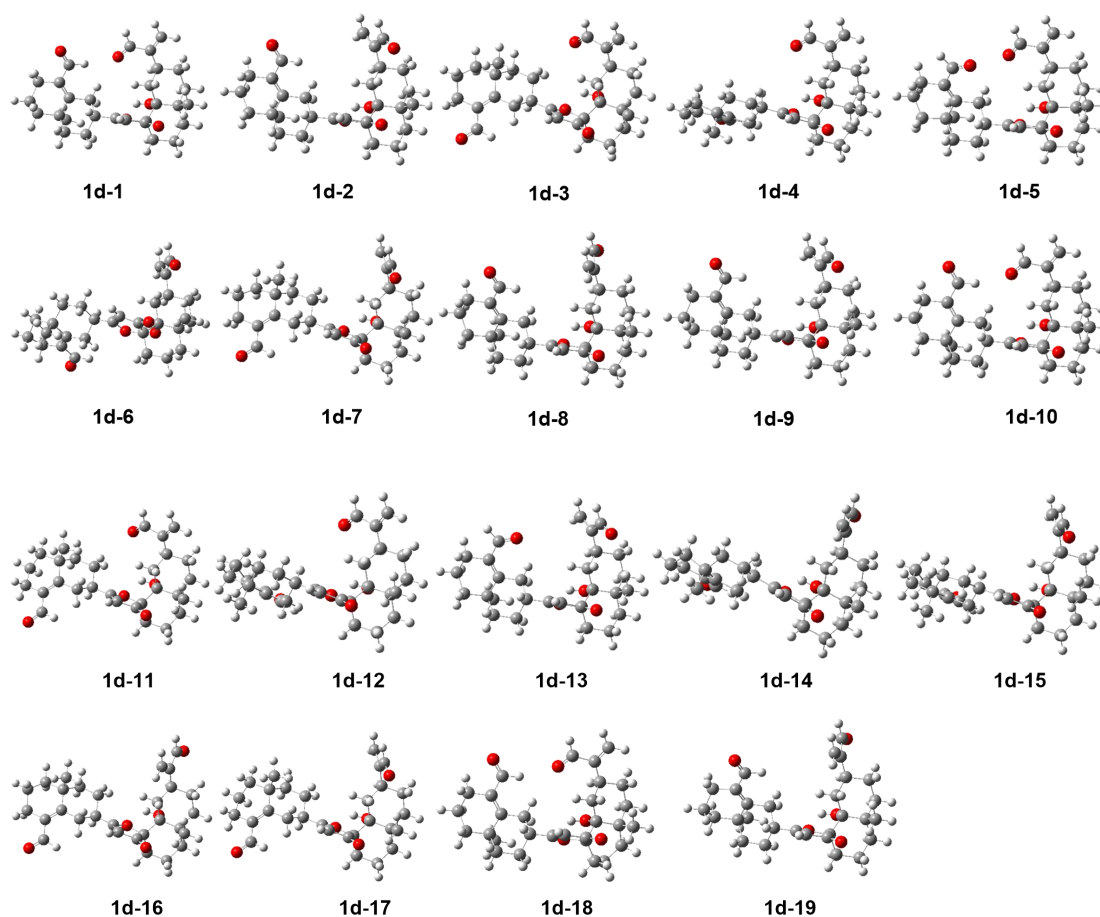

**Figure S9.** Optimized geometries of predominant conformers for **1d** at the B3LYP/6-31G (d,p) level

**Table S2.** Conformational analysis of the optimized **1a-1d** at the B3LYP/6-31G(d,p) level in the gas phase

|           | <i>Conformers</i> | G (Hartree) | $\Delta G$ (Kcal/mol) | Population |
|-----------|-------------------|-------------|-----------------------|------------|
| <b>1a</b> | 1a-1              | -1503.56085 | 0.439257              | 10.87%     |
|           | 1a-2              | -1503.56155 | 0                     | 22.92%     |
|           | 1a-3              | -1503.55994 | 1.0102911             | 4.13%      |
|           | 1a-4              | -1503.55956 | 1.2487449             | 2.78%      |
|           | 1a-5              | -1503.55916 | 1.4997489             | 1.82%      |
|           | 1a-6              | -1503.55987 | 1.0542168             | 3.83%      |
|           | 1a-7              | -1503.55944 | 1.3240461             | 2.45%      |
|           | 1a-8              | -1503.55998 | 0.9851907             | 4.34%      |
|           | 1a-9              | -1503.5608  | 0.4706325             | 10.30%     |
|           | 1a-10             | -1503.55861 | 1.8448794             | 1.02%      |
|           | 1a-11             | -1503.55934 | 1.3867971             | 2.20%      |

|           |                   |             |                       |            |
|-----------|-------------------|-------------|-----------------------|------------|
|           | 1a-12             | -1503.55915 | 1.506024              | 1.79%      |
|           | 1a-13             | -1503.559   | 1.6001505             | 1.54%      |
|           | 1a-14             | -1503.55856 | 1.8762549             | 0.96%      |
|           | 1a-15             | -1503.56067 | 0.5522088             | 8.96%      |
|           | 1a-16             | -1503.55892 | 1.6503513             | 1.41%      |
|           | 1a-17             | -1503.56111 | 0.2761044             | 14.26%     |
|           | 1a-18             | -1503.55933 | 1.3930722             | 2.16%      |
|           | 1a-19             | -1503.55832 | 2.0268573             | 0.75%      |
|           | 1a-20             | -1503.559   | 1.6001505             | 1.53%      |
|           | <i>Conformers</i> | G (Hartree) | $\Delta G$ (Kcal/mol) | Population |
| <b>1b</b> | 1b-1              | -1503.56912 | 0                     | 19.86%     |
|           | 1b-2              | -1503.5672  | 1.2048192             | 2.61%      |
|           | 1b-3              | -1503.56866 | 0.2886546             | 12.17%     |
|           | 1b-4              | -1503.5682  | 0.5773092             | 7.52%      |
|           | 1b-5              | -1503.5685  | 0.3890562             | 10.26%     |
|           | 1b-6              | -1503.56655 | 1.6127007             | 1.30%      |
|           | 1b-7              | -1503.5681  | 0.6400602             | 6.75%      |
|           | 1b-8              | -1503.56808 | 0.6526104             | 6.58%      |
|           | 1b-9              | -1503.56696 | 1.3554216             | 2.02%      |
|           | 1b-10             | -1503.56752 | 1.004016              | 3.66%      |
|           | 1b-11             | -1503.56795 | 0.7341867             | 5.76%      |
|           | 1b-12             | -1503.56686 | 1.4181726             | 1.82%      |
|           | 1b-13             | -1503.568   | 0.7028112             | 6.04%      |
|           | 1b-14             | -1503.56623 | 1.8135039             | 0.93%      |
|           | 1b-15             | -1503.56504 | 2.5602408             | 0.26%      |
|           | 1b-16             | -1503.56812 | 0.62751               | 6.90%      |
|           | 1b-17             | -1503.56698 | 1.3428714             | 2.06%      |
|           | 1b-18             | -1503.56652 | 1.631526              | 1.26%      |
|           | 1b-19             | -1503.56655 | 1.6127007             | 1.30%      |
|           | 1b-20             | -1503.56624 | 1.8072288             | 0.94%      |
|           | <i>Conformers</i> | G (Hartree) | $\Delta G$ (Kcal/mol) | Population |
| <b>1c</b> | 1c-1              | -1503.56819 | 0.7781124             | 6.56%      |
|           | 1c-2              | -1503.56943 | 0                     | 24.54%     |

|           |                   |             |                       |            |
|-----------|-------------------|-------------|-----------------------|------------|
|           | 1c-3              | -1503.56812 | 0.8220381             | 6.10%      |
|           | 1c-4              | -1503.56736 | 1.2989457             | 2.72%      |
|           | 1c-5              | -1503.5683  | 0.7090863             | 7.38%      |
|           | 1c-6              | -1503.56855 | 0.5522088             | 9.61%      |
|           | 1c-7              | -1503.56796 | 0.9224397             | 5.16%      |
|           | 1c-8              | -1503.56847 | 0.6024096             | 8.84%      |
|           | 1c-9              | -1503.56733 | 1.317771              | 2.65%      |
|           | 1c-10             | -1503.56817 | 0.7906626             | 6.47%      |
|           | 1c-11             | -1503.56747 | 1.2299196             | 3.09%      |
|           | 1c-12             | -1503.56671 | 1.7068272             | 1.37%      |
|           | 1c-13             | -1503.56696 | 1.5499497             | 1.78%      |
|           | 1c-14             | -1503.56733 | 1.317771              | 2.65%      |
|           | 1c-15             | -1503.56626 | 1.9892067             | 0.85%      |
|           | 1c-16             | -1503.56739 | 1.2801204             | 2.83%      |
|           | 1c-17             | -1503.56802 | 0.8847891             | 5.50%      |
|           | 1c-18             | -1503.56679 | 1.6566264             | 1.49%      |
|           | 1c-19             | -1503.56452 | 3.0810741             | 0.14%      |
|           | 1c-20             | -1503.56524 | 2.6292669             | 0.29%      |
|           | <i>Conformers</i> | G (Hartree) | $\Delta G$ (Kcal/mol) | Population |
| <b>1d</b> | 1d-1              | -1503.56122 | 0                     | 17.14%     |
|           | 1d-2              | -1503.55989 | 0.8345883             | 4.18%      |
|           | 1d-3              | -1503.56013 | 0.6839859             | 5.36%      |
|           | 1d-4              | -1503.5607  | 0.3263052             | 9.90%      |
|           | 1d-5              | -1503.56117 | 0.0313755             | 16.14%     |
|           | 1d-6              | -1503.55817 | 1.9139055             | 0.68%      |
|           | 1d-7              | -1503.55967 | 0.9726405             | 3.31%      |
|           | 1d-8              | -1503.55927 | 1.2236445             | 2.16%      |
|           | 1d-9              | -1503.5608  | 0.2635542             | 10.90%     |
|           | 1d-10             | -1503.55849 | 1.7131023             | 0.94%      |
|           | 1d-11             | -1503.55968 | 0.9663654             | 3.33%      |
|           | 1d-12             | -1503.56012 | 0.690261              | 5.33%      |
|           | 1d-13             | -1503.55815 | 1.9264557             | 0.66%      |
|           | 1d-14             | -1503.56052 | 0.439257              | 8.16%      |

|       |             |           |       |
|-------|-------------|-----------|-------|
| 1d-15 | -1503.5584  | 1.7695782 | 0.86% |
| 1d-16 | -1503.56037 | 0.5333835 | 6.96% |
| 1d-17 | -1503.5584  | 1.7695782 | 0.86% |
| 1d-18 | -1503.55564 | 3.5015058 | 0.05% |
| 1d-19 | -1503.5596  | 1.0165662 | 3.08% |

| Functional<br>mPW1PW91 |      | Solvent?<br>PCM |           | Basis Set<br>6-311+G(d, p) |           |           | Type of Data<br>Unscaled Shifts |  |
|------------------------|------|-----------------|-----------|----------------------------|-----------|-----------|---------------------------------|--|
|                        |      | DP4+            | 0.00%     | 100.00%                    | 0.00%     | 0.00%     | -                               |  |
| Nuclei                 | sp2? | xperimenta      | Isomer 1  | Isomer 2                   | Isomer 3  | Isomer 4  | Isomer 5                        |  |
| C                      |      | 17.7            | 21.28654  | 22.07557                   | 22.09116  | 21.24867  |                                 |  |
| C                      |      | 30.7            | 33.77724  | 35.71667                   | 35.81054  | 33.68527  |                                 |  |
| C                      |      | 92.1            | 102.37902 | 99.03029                   | 97.15884  | 102.34893 |                                 |  |
| C                      |      | 75.4            | 82.53878  | 82.19809                   | 82.66175  | 82.48983  |                                 |  |
| C                      |      | 36.9            | 45.10501  | 42.65638                   | 43.86121  | 45.11795  |                                 |  |
| C                      |      | 33.4            | 37.07678  | 36.55575                   | 36.78029  | 37.04621  |                                 |  |
| C                      |      | 31.9            | 34.7799   | 34.77982                   | 35.03675  | 35.00251  |                                 |  |
| C                      |      | 33.3            | 37.25832  | 39.86039                   | 39.95167  | 37.23545  |                                 |  |
| C                      |      | 25.9            | 28.51119  | 28.69531                   | 28.6684   | 28.14869  |                                 |  |
| C                      |      | 36              | 39.47818  | 38.79995                   | 38.76548  | 39.40745  |                                 |  |
| C                      |      | 20.4            | 20.50002  | 21.19903                   | 21.23672  | 20.4994   |                                 |  |
| C                      | x    | 154.3           | 163.99703 | 163.78546                  | 163.75601 | 163.90096 |                                 |  |
| C                      |      | 17.8            | 21.2895   | 21.2645                    | 21.39114  | 21.28616  |                                 |  |
| C                      |      | 24.1            | 27.87727  | 27.88899                   | 27.89726  | 27.55845  |                                 |  |
| C                      | x    | 134.2           | 142.01403 | 141.98554                  | 142.04333 | 142.46944 |                                 |  |
| C                      | x    | 160             | 176.39492 | 176.46826                  | 176.6065  | 176.49577 |                                 |  |
| C                      |      | 36.6            | 43.02031  | 43.05416                   | 43.13074  | 43.0569   |                                 |  |
| C                      |      | 39.3            | 41.64778  | 41.64833                   | 41.6262   | 41.68942  |                                 |  |
| C                      |      | 26.7            | 30.98049  | 30.50904                   | 30.35582  | 30.26555  |                                 |  |
| C                      |      | 41.5            | 46.86069  | 47.21002                   | 47.43459  | 46.64085  |                                 |  |
| C                      |      | 25.5            | 28.7168   | 28.75836                   | 28.91051  | 29.04269  |                                 |  |
| C                      |      | 40.6            | 43.84776  | 43.95201                   | 43.83556  | 43.76821  |                                 |  |
| C                      |      | 25.1            | 26.63376  | 26.60792                   | 26.62651  | 26.56878  |                                 |  |
| C                      | x    | 190.4           | 198.61497 | 198.2718                   | 198.22167 | 198.48681 |                                 |  |
| C                      | x    | 195.3           | 201.74511 | 206.47181                  | 206.4798  | 201.74668 |                                 |  |
| C                      | x    | 209.9           | 212.00301 | 219.25186                  | 219.22757 | 212.03273 |                                 |  |
| C                      | x    | 134.1           | 145.39787 | 146.67394                  | 146.7036  | 145.51192 |                                 |  |
| C                      | x    | 101.9           | 110.10522 | 107.9646                   | 108.10886 | 110.01432 |                                 |  |
| C                      | x    | 194.7           | 205.15187 | 205.28332                  | 205.33814 | 205.34177 |                                 |  |
| H                      |      | 1.85            | 2.28218   | 1.98007                    | 1.5607    | 2.27434   |                                 |  |
| H                      |      | 1.6             | 1.5479    | 1.58346                    | 1.97799   | 1.55381   |                                 |  |
| H                      |      | 2.29            | 2.41156   | 2.30955                    | 2.3093    | 2.4218    |                                 |  |
| H                      |      | 1.39            | 1.62133   | 1.37005                    | 1.38555   | 1.63799   |                                 |  |
| H                      |      | 1.96            | 2.00099   | 2.13966                    | 2.13305   | 1.99955   |                                 |  |
| H                      |      | 1.07            | 1.11285   | 1.10386                    | 1.09295   | 1.11724   |                                 |  |
| H                      |      | 1               | 1.3546    | 0.89333                    | 0.93574   | 1.45645   |                                 |  |
| H                      |      | 1.81            | 1.41625   | 1.9711                     | 1.97614   | 1.30881   |                                 |  |
| H                      |      | 3.06            | 3.21786   | 3.1437                     | 3.14639   | 3.19176   |                                 |  |
| H                      |      | 1.47            | 1.49063   | 1.40784                    | 1.4098    | 1.41934   |                                 |  |
| H                      |      | 1.66            | 1.73036   | 1.91263                    | 1.9811    | 1.8095    |                                 |  |
| H                      |      | 1.05            | 1.104     | 1.07498                    | 1.074     | 1.12053   |                                 |  |
| H                      |      | 1.99            | 2.21462   | 2.13592                    | 2.14339   | 2.21918   |                                 |  |
| H                      |      | 1.23            | 1.22907   | 1.92244                    | 1.9283    | 1.22401   |                                 |  |
| H                      |      | 1.23            | 2.92265   | 0.40342                    | 0.41759   | 2.90188   |                                 |  |
| H                      |      | 1.23            | 0.23191   | 1.65921                    | 1.69075   | 0.2352    |                                 |  |
| H                      |      | 1.6             | 1.63284   | 1.63767                    | 1.65598   | 1.64985   |                                 |  |
| H                      |      | 1.69            | 1.65436   | 1.66737                    | 1.63868   | 1.62674   |                                 |  |
| H                      |      | 2.37            | 2.5748    | 2.5684                     | 2.16664   | 2.16217   |                                 |  |
| H                      |      | 2.13            | 2.10861   | 2.13336                    | 2.53257   | 2.50863   |                                 |  |
| H                      |      | 1.6             | 1.61928   | 1.62611                    | 1.41536   | 1.42041   |                                 |  |
| H                      |      | 1.4             | 1.39152   | 1.40722                    | 1.63557   | 1.61022   |                                 |  |
| H                      |      | 3.59            | 3.84629   | 3.85282                    | 2.66768   | 2.41117   |                                 |  |
| H                      |      | 2.37            | 2.37944   | 2.48714                    | 3.68219   | 3.85583   |                                 |  |
| H                      |      | 2.68            | 2.60142   | 2.72833                    | 2.7531    | 2.6185    |                                 |  |
| H                      |      | 1.89            | 1.79729   | 1.85899                    | 2.15631   | 1.99111   |                                 |  |
| H                      |      | 1.95            | 2.06969   | 2.07991                    | 1.80134   | 1.81598   |                                 |  |
| H                      |      | 1.58            | 1.54878   | 1.6008                     | 1.85998   | 1.81727   |                                 |  |
| H                      |      | 1.78            | 1.87995   | 1.8648                     | 1.61331   | 1.6001    |                                 |  |
| H                      |      | 1.25            | 0.79483   | 0.80274                    | 1.91053   | 1.83154   |                                 |  |
| H                      |      | 1.25            | 1.86074   | 1.8793                     | 0.82408   | 0.79158   |                                 |  |
| H                      |      | 1.25            | 1.28646   | 1.3074                     | 1.29032   | 1.24902   |                                 |  |
| H                      | x    | 10.18           | 10.62448  | 10.51367                   | 10.51453  | 10.62154  |                                 |  |
| H                      |      | 4.16            | 1.88632   | 4.66387                    | 4.69454   | 1.87999   |                                 |  |
| H                      | x    | 5.9             | 6.39039   | 6.33558                    | 6.32785   | 6.40405   |                                 |  |
| H                      | x    | 6.17            | 6.7306    | 6.75967                    | 6.74802   | 6.74249   |                                 |  |
| H                      | x    | 5.44            | 5.46949   | 5.56341                    | 5.54858   | 5.44336   |                                 |  |
| H                      | x    | 9.48            | 9.78494   | 9.79064                    | 9.78958   | 9.80753   |                                 |  |



| Functional<br>mPW1PW91 | Solvent?<br>PCM |          | Basis Set<br>6-311+G(d,p) |          | Type of Data<br>Unscaled Shifts |          |
|------------------------|-----------------|----------|---------------------------|----------|---------------------------------|----------|
|                        | Isomer 1        | Isomer 2 | Isomer 3                  | Isomer 4 | Isomer 5                        | Isomer 6 |
| sDP4+ (H data)         | 0.00%           | 100.00%  | 0.00%                     | 0.00%    | -                               | -        |
| sDP4+ (C data)         | 0.00%           | 91.39%   | 8.61%                     | 0.00%    | -                               | -        |
| sDP4+ (all data)       | 0.00%           | 100.00%  | 0.00%                     | 0.00%    | -                               | -        |
| uDP4+ (H data)         | 0.00%           | 100.00%  | 0.00%                     | 0.00%    | -                               | -        |
| uDP4+ (C data)         | 0.81%           | 53.05%   | 45.65%                    | 0.49%    | -                               | -        |
| uDP4+ (all data)       | 0.00%           | 100.00%  | 0.00%                     | 0.00%    | -                               | -        |
| DP4+ (H data)          | 0.00%           | 100.00%  | 0.00%                     | 0.00%    | -                               | -        |
| DP4+ (C data)          | 0.00%           | 92.50%   | 7.50%                     | 0.00%    | -                               | -        |
| DP4+ (all data)        | 0.00%           | 100.00%  | 0.00%                     | 0.00%    | -                               | -        |

**Figure S10.** DP4+ analysis of experimental NMR data of **1** and unscaled shifts of **1a-1d** (Isomer 1-4)

**Table S3.** The Cartesian coordinates of the lowest energy conformers for **1a-1d** in the gas phase at the B3LYP/6-31G(d,p) level

| 1a-1 | X axis(Å) | Y axis(Å) | Z axis(Å) | 1a-2 | X axis(Å) | Y axis(Å) | Z axis(Å) |
|------|-----------|-----------|-----------|------|-----------|-----------|-----------|
| C    | -4.316    | -2.335    | 1.4723    | C    | 2.9752    | -3.4615   | -1.059    |
| C    | -2.7933   | -2.4488   | 1.4915    | C    | 1.581     | -2.8637   | -0.8882   |
| C    | -2.0895   | -1.5539   | 0.4625    | C    | 1.5491    | -1.5827   | -0.0428   |
| C    | -2.6375   | -0.0995   | 0.4738    | C    | 2.6486    | -0.5685   | -0.4653   |
| C    | -4.1967   | 0.0046    | 0.408     | C    | 4.081     | -1.1871   | -0.59     |
| C    | -4.8086   | -0.884    | 1.5229    | C    | 4.0152    | -2.4315   | -1.5138   |
| C    | -1.9705   | 0.8399    | -0.5552   | C    | 2.6695    | 0.7319    | 0.369     |
| C    | -2.3895   | 2.3165    | -0.3564   | C    | 3.642     | 1.7862    | -0.214    |
| C    | -3.9275   | 2.4513    | -0.3373   | C    | 5.0482    | 1.187     | -0.4284   |
| C    | -4.5979   | 1.4892    | 0.6536    | C    | 5.0197    | -0.1219   | -1.2288   |
| C    | -4.8177   | -0.4188   | -0.9456   | C    | 4.7227    | -1.6137   | 0.7532    |
| O    | -0.6769   | -1.4821   | 0.8716    | O    | 0.2475    | -0.9483   | -0.3114   |
| C    | -1.682    | 3.2165    | -1.3589   | C    | 3.6145    | 3.0572    | 0.6214    |
| C    | 6.368     | 0.45      | 0.0573    | C    | -6.4994   | 1.4234    | -0.7517   |
| C    | 5.5096    | 1.0691    | 1.1526    | C    | -6.6071   | 0.0614    | -0.0788   |
| C    | 4.0252    | 0.854     | 0.9673    | C    | -5.292    | -0.6759   | 0.0286    |
| C    | 3.496     | -0.0613   | 0.1177    | C    | -4.0825   | -0.0884   | -0.1479   |
| C    | 4.3984    | -0.9614   | -0.7495   | C    | -3.9631   | 1.4204    | -0.457    |
| C    | 5.876     | -0.9502   | -0.2695   | C    | -5.2969   | 2.1798    | -0.2129   |
| C    | 2.0038    | -0.2911   | -0.0856   | C    | -2.7406   | -0.8084   | -0.0784   |
| C    | 1.5941    | -1.7769   | 0.0015    | C    | -1.7487   | -0.1174   | 0.8748    |
| C    | 2.4325    | -2.6229   | -0.9654   | C    | -1.5599   | 1.3558    | 0.4946    |
| C    | 3.9231    | -2.4373   | -0.6899   | C    | -2.9019   | 2.083     | 0.4622    |
| C    | 4.3496    | -0.4545   | -2.2109   | C    | -3.5585   | 1.6013    | -1.9395   |
| C    | 3.1982    | 1.7852    | 1.8015    | C    | -5.4673   | -2.1328   | 0.3253    |
| O    | 3.6865    | 2.469     | 2.6963    | O    | -6.5563   | -2.6247   | 0.602     |
| C    | 0.1014    | -1.9101   | -0.1988   | C    | -0.4214   | -0.8296   | 0.8986    |
| C    | -1.9486   | -2.2194   | -0.8919   | C    | 1.4193    | -1.8648   | 1.4425    |
| O    | -2.2535   | 0.4374    | 1.7779    | O    | 2.2734    | -0.1454   | -1.813    |

|             |                  |                  |                  |             |                  |                  |                  |
|-------------|------------------|------------------|------------------|-------------|------------------|------------------|------------------|
| C           | -2.2382          | 3.8679           | -2.3939          | C           | 4.5745           | 3.5039           | 1.4482           |
| O           | -2.8407          | -2.606           | -1.6303          | O           | 2.2045           | -2.4633          | 2.1605           |
| C           | -0.5482          | -2.3836          | -1.2576          | C           | 0.1698           | -1.3384          | 1.9738           |
| C           | -0.2175          | 3.4444           | -1.157           | C           | 2.4102           | 3.9323           | 0.4855           |
| O           | 0.4367           | 2.8763           | -0.2899          | O           | 1.4454           | 3.6393           | -0.2107          |
| H           | -4.7102          | -2.8414          | 0.5852           | H           | 3.2886           | -3.9341          | -0.1224          |
| H           | -4.7247          | -2.8789          | 2.3325           | H           | 2.9282           | -4.2695          | -1.7992          |
| H           | -2.4359          | -2.1941          | 2.4986           | H           | 1.1677           | -2.6511          | -1.8836          |
| H           | -2.5084          | -3.4984          | 1.3434           | H           | 0.9142           | -3.622           | -0.4577          |
| H           | -4.566           | -0.4698          | 2.5102           | H           | 3.7754           | -2.1261          | -2.5407          |
| H           | -5.9038          | -0.8756          | 1.4535           | H           | 4.9988           | -2.9156          | -1.5653          |
| H           | -0.8838          | 0.7754           | -0.4432          | H           | 1.6631           | 1.1654           | 0.3809           |
| H           | -2.1909          | 0.5196           | -1.5799          | H           | 2.9246           | 0.5218           | 1.414            |
| H           | -2.0477          | 2.641            | 0.637            | H           | 3.2836           | 2.0675           | -1.2147          |
| H           | -4.203           | 3.4792           | -0.0691          | H           | 5.6784           | 1.9109           | -0.9605          |
| H           | -4.3422          | 2.2717           | -1.3358          | H           | 5.5397           | 0.9997           | 0.5329           |
| H           | -5.687           | 1.6048           | 0.5815           | H           | 6.0417           | -0.5144          | -1.3069          |
| H           | -4.336           | 1.7948           | 1.6747           | H           | 4.7089           | 0.0987           | -2.2579          |
| H           | -4.312           | 0.0279           | -1.805           | H           | 4.6326           | -0.8503          | 1.5299           |
| H           | -4.8231          | -1.498           | -1.0938          | H           | 4.3049           | -2.5373          | 1.1521           |
| H           | -5.8696          | -0.1111          | -0.9979          | H           | 5.7938           | -1.8113          | 0.6213           |
| H           | 6.3494           | 1.0827           | -0.8373          | H           | -6.422           | 1.3015           | -1.8381          |
| H           | 7.4123           | 0.4115           | 0.3884           | H           | -7.4154          | 1.9966           | -0.5671          |
| H           | 5.7402           | 2.141            | 1.1905           | H           | -7.3349          | -0.5328          | -0.645           |
| H           | 5.8004           | 0.644            | 2.1219           | H           | -7.0142          | 0.1891           | 0.9326           |
| H           | 6.528            | -1.4002          | -1.0287          | H           | -5.2576          | 3.1782           | -0.6664          |
| H           | 5.9854           | -1.5688          | 0.6321           | H           | -5.4501          | 2.3402           | 0.8633           |
| H           | 1.406            | 0.2548           | 0.6474           | H           | -2.8373          | -1.8467          | 0.2451           |
| H           | 1.7213           | 0.1172           | -1.0649          | H           | -2.3249          | -0.8571          | -1.0932          |
| H           | 1.8135           | -2.1335          | 1.0186           | H           | -2.1786          | -0.1508          | 1.8867           |
| H           | 2.1799           | -3.6844          | -0.8485          | H           | -0.9051          | 1.8497           | 1.224            |
| H           | 2.2142           | -2.3632          | -2.0077          | H           | -1.0608          | 1.4488           | -0.4776          |
| H           | 4.1349           | -2.8535          | 0.3049           | H           | -3.2826          | 2.1251           | 1.4922           |
| H           | 4.4949           | -3.0447          | -1.4033          | H           | -2.7357          | 3.1237           | 0.1552           |
| H           | 5.0049           | -1.0519          | -2.8552          | H           | -3.5071          | 2.6635           | -2.2052          |
| H           | 3.3437           | -0.506           | -2.6392          | H           | -2.5784          | 1.1685           | -2.163           |
| H           | 4.6712           | 0.5897           | -2.2892          | H           | -4.2766          | 1.1252           | -2.6161          |
| H           | 2.1244           | 1.8388           | 1.5816           | H           | -4.5715          | -2.7645          | 0.2861           |
| H           | -1.2967          | 0.2657           | 1.884            | H           | 1.3474           | 0.1654           | -1.7624          |
| H           | -1.6646          | 4.5086           | -3.0581          | H           | 4.4834           | 4.4351           | 2.0006           |
| H           | -3.2958          | 3.7873           | -2.6227          | H           | 5.4953           | 2.9535           | 1.6107           |
| H           | -0.1934          | -2.7778          | -2.1904          | H           | -0.1426          | -1.3702          | 3.0001           |
| H           | 0.2585           | 4.1571           | -1.8518          | H           | 2.4307           | 4.8725           | 1.0624           |
| <b>1a-3</b> | <b>X axis(Å)</b> | <b>Y axis(Å)</b> | <b>Z axis(Å)</b> | <b>1a-4</b> | <b>X axis(Å)</b> | <b>Y axis(Å)</b> | <b>Z axis(Å)</b> |
| C           | 2.7488           | -3.5198          | -1.0029          | C           | 4.3404           | -2.8163          | -0.5932          |
| C           | 1.3764           | -2.8677          | -0.8579          | C           | 2.8311           | -2.8157          | -0.8238          |
| C           | 1.3987           | -1.537           | -0.0918          | C           | 2.1006           | -1.6362          | -0.1693          |

|   |         |         |         |   |         |         |         |
|---|---------|---------|---------|---|---------|---------|---------|
| C | 2.5151  | -0.5827 | -0.6043 | C | 2.8065  | -0.2767 | -0.4399 |
| C | 3.9284  | -1.2513 | -0.7036 | C | 4.3441  | -0.2814 | -0.1552 |
| C | 3.8135  | -2.5555 | -1.5364 | C | 4.9946  | -1.4678 | -0.9143 |
| C | 2.5812  | 0.7756  | 0.1296  | C | 2.1207  | 0.9404  | 0.2214  |
| C | 3.6083  | 1.7361  | -0.5168 | C | 2.7285  | 2.2848  | -0.2477 |
| C | 4.9882  | 1.0887  | -0.7256 | C | 4.2622  | 2.2869  | -0.0649 |
| C | 4.8941  | -0.27   | -1.4291 | C | 4.9414  | 1.0565  | -0.6819 |
| C | 4.5738  | -1.5977 | 0.6604  | C | 4.7248  | -0.3959 | 1.3413  |
| O | 0.1089  | -0.8805 | -0.3734 | O | 0.7746  | -1.5672 | -0.8058 |
| C | 3.7021  | 3.0622  | 0.213   | C | 2.0105  | 3.4612  | 0.4002  |
| C | -6.6415 | 1.5149  | -0.7586 | C | -6.6223 | 0.1886  | -0.2284 |
| C | -6.7342 | 0.2192  | 0.0364  | C | -5.7205 | 1.4027  | -0.4144 |
| C | -5.4222 | -0.5219 | 0.1587  | C | -4.2766 | 1.1642  | -0.0356 |
| C | -4.2156 | 0.0319  | -0.1184 | C | -3.7531 | -0.0651 | 0.196   |
| C | -4.0957 | 1.5049  | -0.5667 | C | -4.5975 | -1.3446 | 0.0165  |
| C | -5.411  | 2.3003  | -0.3378 | C | -5.9287 | -1.0654 | -0.7347 |
| C | -2.8789 | -0.6963 | -0.0382 | C | -2.3306 | -0.3365 | 0.6663  |
| C | -1.8419 | 0.0647  | 0.808   | C | -1.6001 | -1.3438 | -0.2408 |
| C | -1.655  | 1.4948  | 0.2886  | C | -2.3898 | -2.6527 | -0.348  |
| C | -2.9907 | 2.2335  | 0.2451  | C | -3.8175 | -2.3898 | -0.8282 |
| C | -3.7516 | 1.5469  | -2.0747 | C | -4.9313 | -1.9379 | 1.4057  |
| C | -5.5997 | -1.9432 | 0.5952  | C | -3.4848 | 2.4322  | 0.07    |
| O | -6.6843 | -2.3958 | 0.9462  | O | -4.0051 | 3.5424  | 0.019   |
| C | -0.524  | -0.6641 | 0.8437  | C | -0.1812 | -1.6042 | 0.2015  |
| C | 1.2908  | -1.7342 | 1.4088  | C | 1.6995  | -1.9131 | 1.2663  |
| O | 2.1245  | -0.2409 | -1.973  | O | 2.6624  | -0.0566 | -1.8773 |
| C | 3.3785  | 4.2359  | -0.3555 | C | 2.5122  | 4.3159  | 1.3073  |
| O | 2.0467  | -2.357  | 2.1369  | O | 2.4285  | -2.1945 | 2.2043  |
| C | 0.0832  | -1.1151 | 1.9359  | C | 0.2565  | -1.8147 | 1.4391  |
| C | 4.1738  | 3.1128  | 1.6246  | C | 0.6088  | 3.7361  | -0.0432 |
| O | 4.4622  | 2.1155  | 2.2732  | O | -0.0071 | 3.0018  | -0.8072 |
| H | 3.0603  | -3.9382 | -0.0402 | H | 4.5534  | -3.1082 | 0.4404  |
| H | 2.6676  | -4.3733 | -1.6868 | H | 4.7964  | -3.5909 | -1.2216 |
| H | 0.9582  | -2.7029 | -1.8602 | H | 2.6431  | -2.8027 | -1.906  |
| H | 0.6902  | -3.5753 | -0.3748 | H | 2.412   | -3.7671 | -0.4716 |
| H | 3.5709  | -2.3147 | -2.5797 | H | 4.9327  | -1.3011 | -1.9976 |
| H | 4.7815  | -3.0721 | -1.5635 | H | 6.065   | -1.5248 | -0.6789 |
| H | 1.6022  | 1.2702  | 0.0856  | H | 2.1636  | 0.8694  | 1.3143  |
| H | 2.7999  | 0.6176  | 1.1895  | H | 1.0583  | 0.9336  | -0.0431 |
| H | 3.2291  | 1.9563  | -1.526  | H | 2.5541  | 2.3812  | -1.3291 |
| H | 5.6177  | 1.7544  | -1.3301 | H | 4.6855  | 3.1886  | -0.5255 |
| H | 5.5133  | 0.9661  | 0.2279  | H | 4.5222  | 2.3336  | 0.9988  |
| H | 5.899   | -0.7061 | -1.4982 | H | 6.0177  | 1.1003  | -0.4707 |
| H | 4.5707  | -0.1098 | -2.4657 | H | 4.8527  | 1.1145  | -1.7743 |
| H | 4.5078  | -0.779  | 1.3812  | H | 4.1689  | 0.2976  | 1.977   |
| H | 4.1398  | -2.4814 | 1.1263  | H | 4.5772  | -1.3971 | 1.7441  |
| H | 5.6389  | -1.8289 | 0.5343  | H | 5.7902  | -0.1762 | 1.4836  |

|             |                  |                  |                  |             |                  |                  |                  |
|-------------|------------------|------------------|------------------|-------------|------------------|------------------|------------------|
| H           | -6.6101          | 1.2964           | -1.8321          | H           | -6.8911          | 0.0789           | 0.8284           |
| H           | -7.5438          | 2.1139           | -0.5892          | H           | -7.5609          | 0.3431           | -0.7732          |
| H           | -7.4889          | -0.4138          | -0.4464          | H           | -6.1432          | 2.224            | 0.1769           |
| H           | -7.1002          | 0.441            | 1.0473           | H           | -5.7519          | 1.7154           | -1.4662          |
| H           | -5.3809          | 3.2541           | -0.8796          | H           | -6.6071          | -1.9229          | -0.6435          |
| H           | -5.5183          | 2.5574           | 0.7251           | H           | -5.7389          | -0.94            | -1.8096          |
| H           | -2.972           | -1.7003          | 0.3807           | H           | -1.7245          | 0.5695           | 0.7304           |
| H           | -2.5055          | -0.8411          | -1.0602          | H           | -2.3815          | -0.7161          | 1.6948           |
| H           | -2.2308          | 0.129            | 1.8349           | H           | -1.5526          | -0.8946          | -1.244           |
| H           | -0.9657          | 2.0435           | 0.9431           | H           | -1.8965          | -3.3319          | -1.0549          |
| H           | -1.1961          | 1.4931           | -0.7076          | H           | -2.4098          | -3.1736          | 0.6169           |
| H           | -3.3278          | 2.373            | 1.2817           | H           | -3.7583          | -2.0473          | -1.8708          |
| H           | -2.8279          | 3.2401           | -0.1612          | H           | -4.3665          | -3.34            | -0.85            |
| H           | -3.702           | 2.5802           | -2.4371          | H           | -5.5815          | -2.8154          | 1.3113           |
| H           | -2.7855          | 1.0835           | -2.2979          | H           | -4.0386          | -2.2608          | 1.9502           |
| H           | -4.5013          | 1.0209           | -2.6759          | H           | -5.4462          | -1.2111          | 2.0435           |
| H           | -4.7102          | -2.5849          | 0.5912           | H           | -2.4002          | 2.3349           | 0.196            |
| H           | 1.1702           | -0.0322          | -1.9463          | H           | 1.7115           | -0.1584          | -2.0835          |
| H           | 3.4499           | 5.1838           | 0.1695           | H           | 1.9364           | 5.1446           | 1.7107           |
| H           | 3.0307           | 4.2809           | -1.384           | H           | 3.524            | 4.2234           | 1.688            |
| H           | -0.2043          | -1.078           | 2.9695           | H           | -0.2679          | -1.8852          | 2.3727           |
| H           | 4.2459           | 4.1195           | 2.0704           | H           | 0.1403           | 4.6443           | 0.3734           |
| <b>1a-5</b> | <b>X axis(Å)</b> | <b>Y axis(Å)</b> | <b>Z axis(Å)</b> | <b>1a-6</b> | <b>X axis(Å)</b> | <b>Y axis(Å)</b> | <b>Z axis(Å)</b> |
| C           | -4.1872          | -2.4654          | 1.4837           | C           | -3.0549          | -3.4276          | 1.0576           |
| C           | -2.6608          | -2.5123          | 1.4822           | C           | -1.6439          | -2.859           | 0.9311           |
| C           | -2.0113          | -1.5777          | 0.4527           | C           | -1.556           | -1.5891          | 0.073            |
| C           | -2.6217          | -0.1488          | 0.4881           | C           | -2.65            | -0.5488          | 0.4433           |
| C           | -4.1846          | -0.1118          | 0.4432           | C           | -4.0979          | -1.1382          | 0.5224           |
| C           | -4.7425          | -1.0381          | 1.5559           | C           | -4.0903          | -2.3723          | 1.4622           |
| C           | -2.0091          | 0.8306           | -0.5373          | C           | -2.615           | 0.7415           | -0.406           |
| C           | -2.4886          | 2.2849           | -0.314           | C           | -3.587           | 1.8213           | 0.1291           |
| C           | -4.0306          | 2.3528           | -0.2768          | C           | -5.0116          | 1.2521           | 0.2985           |
| C           | -4.6466          | 1.3514           | 0.7106           | C           | -5.0381          | -0.0474          | 1.1141           |
| C           | -4.8046          | -0.5471          | -0.9069          | C           | -4.6984          | -1.5686          | -0.8385          |
| O           | -0.5974          | -1.4477          | 0.8415           | O           | -0.2529          | -0.9767          | 0.3819           |
| C           | -1.8307          | 3.2271           | -1.3113          | C           | -3.5037          | 3.0816           | -0.7188          |
| C           | 6.2477           | -0.3095          | 0.737            | C           | 6.2313           | 1.6551           | -0.2515          |
| C           | 5.515            | 0.9117           | 1.28             | C           | 6.529            | 0.1668           | -0.1154          |
| C           | 4.0387           | 0.8869           | 0.9678           | C           | 5.2769           | -0.6699          | -0.0094          |
| C           | 3.5039           | 0.1106           | -0.0055          | C           | 4.0722           | -0.1569          | 0.3396           |
| C           | 4.3877           | -0.6944          | -0.9795          | C           | 3.9131           | 1.3151           | 0.7801           |
| C           | 5.9102           | -0.4989          | -0.7317          | C           | 5.2616           | 2.0864           | 0.8347           |
| C           | 2.0142           | -0.1303          | -0.1976          | C           | 2.7463           | -0.8995          | 0.2533           |
| C           | 1.6699           | -1.6323          | -0.0653          | C           | 1.7986           | -0.1943          | -0.7394          |
| C           | 2.5391           | -2.4916          | -0.9995          | C           | 1.621            | 1.2959           | -0.403           |
| C           | 4.0323           | -2.1951          | -0.8188          | C           | 2.9659           | 2.0104           | -0.2322          |
| C           | 4.1351           | -0.2446          | -2.4401          | C           | 3.3178           | 1.4041           | 2.2072           |

|   |         |         |         |   |         |         |         |
|---|---------|---------|---------|---|---------|---------|---------|
| C | 3.2211  | 1.773   | 1.8562  | C | 5.4857  | -2.1075 | -0.3664 |
| O | 3.6952  | 2.3417  | 2.8347  | O | 6.5527  | -2.5386 | -0.7901 |
| C | 0.1826  | -1.8328 | -0.2438 | C | 0.4607  | -0.8832 | -0.8045 |
| C | -1.862  | -2.2243 | -0.91   | C | -1.3777 | -1.8915 | -1.4033 |
| O | -2.2446 | 0.3892  | 1.7938  | O | -2.3158 | -0.1167 | 1.7989  |
| C | -2.4242 | 3.8634  | -2.3348 | C | -4.4236 | 3.5368  | -1.5856 |
| O | -2.7475 | -2.6409 | -1.64   | O | -2.1473 | -2.4848 | -2.1424 |
| C | -0.4613 | -2.3266 | -1.2966 | C | -0.1006 | -1.3937 | -1.8948 |
| C | -0.3765 | 3.5192  | -1.1169 | C | -2.2882 | 3.9347  | -0.5481 |
| O | 0.3091  | 2.9738  | -0.2595 | O | -1.3559 | 3.6317  | 0.1871  |
| H | -4.5706 | -2.9797 | 0.5964  | H | -3.0509 | -4.2273 | 1.8082  |
| H | -4.5602 | -3.0354 | 2.3433  | H | -3.3433 | -3.9054 | 0.1156  |
| H | -2.3012 | -2.2516 | 2.4869  | H | -1.263  | -2.6423 | 1.9385  |
| H | -2.3321 | -3.5469 | 1.3199  | H | -0.977  | -3.6351 | 0.534   |
| H | -4.506  | -0.6237 | 2.5446  | H | -3.8821 | -2.0592 | 2.4936  |
| H | -5.8379 | -1.0773 | 1.5     | H | -5.0845 | -2.8367 | 1.4831  |
| H | -0.9192 | 0.812   | -0.44   | H | -1.6006 | 1.1555  | -0.3863 |
| H | -2.229  | 0.5134  | -1.5631 | H | -2.8363 | 0.5238  | -1.4572 |
| H | -2.1503 | 2.6111  | 0.6801  | H | -3.2599 | 2.1074  | 1.1391  |
| H | -4.3473 | 3.3647  | 0.0061  | H | -5.6465 | 1.9944  | 0.7988  |
| H | -4.4483 | 2.1661  | -1.2727 | H | -5.4713 | 1.0627  | -0.6781 |
| H | -5.7406 | 1.4205  | 0.6526  | H | -6.0699 | -0.4193 | 1.159   |
| H | -4.3857 | 1.6568  | 1.732   | H | -4.7609 | 0.1795  | 2.1514  |
| H | -4.3287 | -0.0709 | -1.7677 | H | -4.5653 | -0.8164 | -1.62   |
| H | -4.7671 | -1.624  | -1.0664 | H | -4.2844 | -2.5047 | -1.2114 |
| H | -5.8689 | -0.2831 | -0.9433 | H | -5.7773 | -1.7443 | -0.7437 |
| H | 7.3285  | -0.1733 | 0.8577  | H | 7.1637  | 2.2251  | -0.1681 |
| H | 5.9736  | -1.2032 | 1.3103  | H | 5.8156  | 1.8699  | -1.2431 |
| H | 5.9502  | 1.8274  | 0.8608  | H | 7.149   | -0.0114 | 0.772   |
| H | 5.6835  | 0.9396  | 2.3631  | H | 7.1221  | -0.1293 | -0.9889 |
| H | 6.2712  | 0.3859  | -1.2746 | H | 5.7509  | 1.9225  | 1.8052  |
| H | 6.4764  | -1.3487 | -1.1332 | H | 5.0876  | 3.1675  | 0.7644  |
| H | 1.4115  | 0.4126  | 0.5337  | H | 2.8606  | -1.9352 | -0.0743 |
| H | 1.7024  | 0.2554  | -1.1757 | H | 2.2992  | -0.9646 | 1.2521  |
| H | 1.9116  | -1.944  | 0.9619  | H | 2.2645  | -0.2502 | -1.7347 |
| H | 2.3619  | -3.5551 | -0.7946 | H | 1.0562  | 1.7911  | -1.2035 |
| H | 2.263   | -2.3316 | -2.048  | H | 1.0219  | 1.4186  | 0.5075  |
| H | 4.3357  | -2.5458 | 0.1766  | H | 3.4499  | 2.0688  | -1.216  |
| H | 4.5979  | -2.7964 | -1.5422 | H | 2.7753  | 3.0458  | 0.078   |
| H | 4.7818  | -0.7954 | -3.1334 | H | 3.2485  | 2.4485  | 2.5343  |
| H | 3.105   | -0.4025 | -2.7711 | H | 2.3129  | 0.9805  | 2.2861  |
| H | 4.3491  | 0.824   | -2.5637 | H | 3.9484  | 0.8709  | 2.9287  |
| H | 2.1667  | 1.9171  | 1.5846  | H | 4.6376  | -2.7872 | -0.2152 |
| H | -1.2797 | 0.2599  | 1.8855  | H | -1.3827 | 0.1756  | 1.7786  |
| H | -1.8859 | 4.5368  | -2.996  | H | -4.2939 | 4.4593  | -2.1446 |
| H | -3.4788 | 3.7365  | -2.5566 | H | -5.3484 | 3.0022  | -1.776  |
| H | -0.1043 | -2.6966 | -2.2385 | H | 0.2479  | -1.4425 | -2.9087 |

|             |                  |                  |                  |             |                  |                  |                  |
|-------------|------------------|------------------|------------------|-------------|------------------|------------------|------------------|
| H           | 0.0617           | 4.259            | -1.8083          | H           | -2.2686          | 4.868            | -1.1362          |
| <b>1a-7</b> | <b>X axis(Å)</b> | <b>Y axis(Å)</b> | <b>Z axis(Å)</b> | <b>1a-8</b> | <b>X axis(Å)</b> | <b>Y axis(Å)</b> | <b>Z axis(Å)</b> |
| C           | -3.9279          | -2.7173          | 1.4759           | C           | 3.8128           | -3.2715          | -0.0136          |
| C           | -2.4025          | -2.6909          | 1.4179           | C           | 2.3283           | -3.0591          | -0.2994          |
| C           | -1.8372          | -1.6376          | 0.454            | C           | 1.8253           | -1.6505          | 0.047            |
| C           | -2.4981          | -0.2442          | 0.6564           | C           | 2.7557           | -0.5393          | -0.5183          |
| C           | -4.0643          | -0.2771          | 0.6654           | C           | 4.2706           | -0.7429          | -0.1752          |
| C           | -4.5412          | -1.3309          | 1.6999           | C           | 4.6987           | -2.1706          | -0.6069          |
| C           | -1.9589          | 0.8607           | -0.2798          | C           | 2.2918           | 0.9014           | -0.206           |
| C           | -2.5434          | 2.2513           | 0.0663           | C           | 3.1711           | 1.9617           | -0.9116          |
| C           | -4.0777          | 2.2454           | 0.1778           | C           | 4.6764           | 1.7429           | -0.6812          |
| C           | -4.5903          | 1.1249           | 1.0899           | C           | 5.1065           | 0.3004           | -0.9719          |
| C           | -4.7091          | -0.6079          | -0.7027          | C           | 4.6223           | -0.5584          | 1.3212           |
| O           | -0.4105          | -1.4888          | 0.7938           | O           | 0.5212           | -1.5012          | -0.6224          |
| C           | -2.0396          | 3.3407           | -0.8605          | C           | 2.7423           | 3.38             | -0.5882          |
| C           | 6.5358           | 0.7297           | 0.0023           | C           | -6.9214          | 0.2752           | -0.5002          |
| C           | 5.7241           | 1.1098           | 1.2336           | C           | -6.1023          | 1.5483           | -0.3332          |
| C           | 4.2382           | 0.8656           | 1.0937           | C           | -4.7113          | 1.3157           | 0.2112           |
| C           | 3.6883           | 0.1097           | 0.1106           | C           | -4.1134          | 0.0991           | 0.2535           |
| C           | 4.5701           | -0.5966          | -0.9411          | C           | -4.8199          | -1.1597          | -0.2949          |
| C           | 6.0707           | -0.6117          | -0.5386          | C           | -6.0746          | -0.8104          | -1.1428          |
| C           | 2.1945           | -0.1221          | -0.0848          | C           | -2.7286          | -0.1781          | 0.826            |
| C           | 1.8279           | -1.6151          | -0.2023          | C           | -1.8175          | -0.9253          | -0.1685          |
| C           | 2.6408           | -2.2743          | -1.326           | C           | -2.4847          | -2.2283          | -0.6267          |
| C           | 4.139            | -2.0792          | -1.1008          | C           | -3.8643          | -1.956           | -1.2235          |
| C           | 4.4311           | 0.1402           | -2.2946          | C           | -5.2609          | -2.0504          | 0.8908           |
| C           | 3.437            | 1.5663           | 2.1475           | C           | -4.0714          | 2.5709           | 0.7181           |
| O           | 3.955            | 2.2091           | 3.0548           | O           | -4.575           | 3.6786           | 0.5644           |
| C           | 0.3314           | -1.7746          | -0.3491          | C           | -0.428           | -1.2099          | 0.353            |
| C           | -1.7319          | -2.1569          | -0.9659          | C           | 1.4065           | -1.5284          | 1.4983           |
| O           | -2.0889          | 0.1814           | 1.996            | O           | 2.6448           | -0.6526          | -1.9732          |
| C           | -1.3048          | 4.3822           | -0.4352          | C           | 2.2889           | 4.2382           | -1.5174          |
| O           | -2.6313          | -2.569           | -1.6804          | O           | 2.0879           | -1.7195          | 2.4927           |
| C           | -0.3487          | -2.1732          | -1.4196          | C           | -0.0044          | -1.1877          | 1.613            |
| C           | -2.3543          | 3.2968           | -2.3152          | C           | 2.8129           | 3.888            | 0.8098           |
| O           | -2.9715          | 2.3803           | -2.8419          | O           | 3.163            | 3.198            | 1.7585           |
| H           | -4.3224          | -3.1653          | 0.558            | H           | 3.9714           | -3.348           | 1.067            |
| H           | -4.2422          | -3.3809          | 2.2906           | H           | 4.1211           | -4.2384          | -0.4294          |
| H           | -2.0154          | -2.504           | 2.4288           | H           | 2.143            | -3.2598          | -1.3634          |
| H           | -2.0345          | -3.69            | 1.1511           | H           | 1.7451           | -3.8166          | 0.2401           |
| H           | -4.2882          | -1.0008          | 2.7159           | H           | 4.6711           | -2.2562          | -1.701           |
| H           | -5.6351          | -1.416           | 1.6743           | H           | 5.7408           | -2.3557          | -0.3163          |
| H           | -0.8683          | 0.9339           | -0.1798          | H           | 1.2624           | 1.0459           | -0.5598          |
| H           | -2.1566          | 0.5961           | -1.3224          | H           | 2.2718           | 1.0607           | 0.8758           |
| H           | -2.1744          | 2.4975           | 1.0732           | H           | 3.0135           | 1.8215           | -1.9916          |
| H           | -4.42            | 3.2085           | 0.5782           | H           | 5.2485           | 2.4177           | -1.331           |
| H           | -4.543           | 2.1499           | -0.8093          | H           | 4.9591           | 2.005            | 0.3441           |

|             |                  |                  |                  |              |                  |                  |                  |
|-------------|------------------|------------------|------------------|--------------|------------------|------------------|------------------|
| H           | -5.6879          | 1.1367           | 1.087            | H            | 6.1735           | 0.1925           | -0.7377          |
| H           | -4.296           | 1.348            | 2.1235           | H            | 5.0217           | 0.1168           | -2.0507          |
| H           | -4.2676          | -0.0429          | -1.5274          | H            | 4.1722           | 0.3378           | 1.7554           |
| H           | -4.6492          | -1.6649          | -0.9586          | H            | 4.3262           | -1.4063          | 1.9374           |
| H           | -5.7807          | -0.3726          | -0.69            | H            | 5.7077           | -0.4683          | 1.4531           |
| H           | 6.4427           | 1.5072           | -0.7644          | H            | -7.3016          | -0.0584          | 0.4721           |
| H           | 7.5987           | 0.6788           | 0.2657           | H            | -7.7989          | 0.4833           | -1.1233          |
| H           | 5.9208           | 2.1677           | 1.4472           | H            | -6.6642          | 2.2216           | 0.3258           |
| H           | 6.0871           | 0.5354           | 2.0957           | H            | -6.0129          | 2.0507           | -1.3051          |
| H           | 6.6939           | -0.8985          | -1.395           | H            | -6.6875          | -1.7057          | -1.307           |
| H           | 6.2482           | -1.3713          | 0.2352           | H            | -5.7734          | -0.4611          | -2.1401          |
| H           | 1.6009           | 0.3082           | 0.7236           | H            | -2.2114          | 0.7348           | 1.1275           |
| H           | 1.8758           | 0.4118           | -0.9899          | H            | -2.8515          | -0.764           | 1.7457           |
| H           | 2.1092           | -2.1121          | 0.7378           | H            | -1.6976          | -0.2737          | -1.0469          |
| H           | 2.426            | -3.3499          | -1.3616          | H            | -1.8667          | -2.7245          | -1.3859          |
| H           | 2.3596           | -1.8671          | -2.3043          | H            | -2.5678          | -2.9326          | 0.2102           |
| H           | 4.4174           | -2.643           | -0.1995          | H            | -3.7157          | -1.4005          | -2.16            |
| H           | 4.6869           | -2.5417          | -1.9319          | H            | -4.325           | -2.9115          | -1.5057          |
| H           | 5.0777           | -0.3121          | -3.0554          | H            | -5.8108          | -2.9302          | 0.5372           |
| H           | 3.4093           | 0.1117           | -2.6856          | H            | -4.4133          | -2.4189          | 1.477            |
| H           | 4.7074           | 1.1969           | -2.2108          | H            | -5.9139          | -1.508           | 1.5834           |
| H           | 2.3452           | 1.488            | 2.085            | H            | -3.114           | 2.4699           | 1.2436           |
| H           | -1.1411          | -0.0382          | 2.0835           | H            | 1.6933           | -0.7515          | -2.1737          |
| H           | -0.9485          | 5.1627           | -1.1009          | H            | 1.984            | 5.2538           | -1.2824          |
| H           | -1.0391          | 4.4876           | 0.6135           | H            | 2.2117           | 3.9429           | -2.5604          |
| H           | -0.025           | -2.4667          | -2.4             | H            | -0.5191          | -0.9983          | 2.5355           |
| H           | -1.9868          | 4.1494           | -2.9114          | H            | 2.5191           | 4.9419           | 0.9527           |
| <b>1a-9</b> | <b>X axis(Å)</b> | <b>Y axis(Å)</b> | <b>Z axis(Å)</b> | <b>1a-10</b> | <b>X axis(Å)</b> | <b>Y axis(Å)</b> | <b>Z axis(Å)</b> |
| C           | 2.5552           | -3.5709          | -1.192           | C            | 2.8268           | -3.4976          | -0.9908          |
| C           | 1.2249           | -2.8522          | -0.9855          | C            | 1.4369           | -2.8751          | -0.8885          |
| C           | 1.3126           | -1.6237          | -0.0683          | C            | 1.4057           | -1.5484          | -0.1158          |
| C           | 2.5066           | -0.6971          | -0.4318          | C            | 2.5183           | -0.5683          | -0.586           |
| C           | 3.8732           | -1.4457          | -0.5937          | C            | 3.9479           | -1.2068          | -0.6413          |
| C           | 3.69             | -2.6208          | -1.5896          | C            | 3.8881           | -2.5085          | -1.4839          |
| C           | 2.6537           | 0.5382           | 0.4855           | C            | 2.5316           | 0.7869           | 0.1566           |
| C           | 3.7423           | 1.5202           | -0.0201          | C            | 3.5592           | 1.7722           | -0.4505          |
| C           | 5.0779           | 0.8049           | -0.295           | C            | 4.9585           | 1.1548           | -0.6165          |
| C           | 4.9165           | -0.4451          | -1.1682          | C            | 4.9163           | -0.2016          | -1.3294          |
| C           | 4.4662           | -2.0122          | 0.72             | C            | 4.5546           | -1.5473          | 0.7418           |
| O           | 0.0795           | -0.8512          | -0.3059          | O            | 0.1126           | -0.9175          | -0.4376          |
| C           | 3.9664           | 2.7203           | 0.8866           | C            | 3.6008           | 3.0958           | 0.2887           |
| C           | -6.5836          | 1.7748           | -0.7168          | C            | -6.3268          | 1.8362           | 0.1975           |
| C           | -6.7513          | 0.382            | -0.1238          | C            | -6.6442          | 0.346            | 0.2188           |
| C           | -5.4656          | -0.4087          | -0.0412          | C            | -5.4053          | -0.5139          | 0.1449           |
| C           | -4.2327          | 0.1422           | -0.1676          | C            | -4.2114          | -0.0535          | -0.3016          |
| C           | -4.054           | 1.6602           | -0.3893          | C            | -4.0576          | 1.3658           | -0.8901          |
| C           | -5.3625          | 2.4541           | -0.1202          | C            | -5.3995          | 2.147            | -0.9641          |

|   |         |         |         |   |         |         |         |
|---|---------|---------|---------|---|---------|---------|---------|
| C | -2.9198 | -0.6306 | -0.1195 | C | -2.8905 | -0.8025 | -0.1977 |
| C | -1.9192 | -0.0311 | 0.8854  | C | -1.8945 | -0.0169 | 0.681   |
| C | -1.6692 | 1.4522  | 0.5898  | C | -1.7166 | 1.4304  | 0.1932  |
| C | -2.9829 | 2.2303  | 0.5798  | C | -3.061  | 2.1432  | 0.009   |
| C | -3.6205 | 1.9082  | -1.8537 | C | -3.5229 | 1.3072  | -2.3426 |
| C | -5.6992 | -1.8724 | 0.1693  | C | -5.6141 | -1.9065 | 0.6505  |
| O | -6.8086 | -2.3365 | 0.4104  | O | -6.6714 | -2.281  | 1.1461  |
| C | -0.6222 | -0.7976 | 0.8898  | C | -0.5643 | -0.7193 | 0.7587  |
| C | 1.1424  | -1.9754 | 1.3983  | C | 1.2518  | -1.7559 | 1.3794  |
| O | 2.1784  | -0.1552 | -1.7473 | O | 2.1664  | -0.2268 | -1.9653 |
| C | 3.7668  | 2.7771  | 2.2141  | C | 3.2714  | 4.2657  | -0.2843 |
| O | 1.8834  | -2.6471 | 2.0977  | O | 1.9952  | -2.3675 | 2.1293  |
| C | -0.0902 | -1.4179 | 1.9369  | C | 0.0152  | -1.1635 | 1.8687  |
| C | 4.4375  | 3.9818  | 0.2398  | C | 4.0245  | 3.1481  | 1.7153  |
| O | 4.6373  | 4.0819  | -0.9641 | O | 4.3127  | 2.1534  | 2.3679  |
| H | 2.8182  | -4.1236 | -0.2843 | H | 3.1149  | -3.9147 | -0.0203 |
| H | 2.4337  | -4.3272 | -1.9769 | H | 2.7863  | -4.3489 | -1.6811 |
| H | 0.8384  | -2.5444 | -1.9667 | H | 1.049   | -2.7137 | -1.9035 |
| H | 0.4864  | -3.5662 | -0.5984 | H | 0.7501  | -3.5996 | -0.432  |
| H | 3.4825  | -2.2332 | -2.5955 | H | 3.6753  | -2.2669 | -2.5334 |
| H | 4.6224  | -3.1935 | -1.6735 | H | 4.8671  | -3.0046 | -1.4812 |
| H | 1.706   | 1.0913  | 0.5206  | H | 1.5445  | 1.2614  | 0.0826  |
| H | 2.866   | 0.2118  | 1.508   | H | 2.7184  | 0.6274  | 1.2223  |
| H | 3.3737  | 1.9085  | -0.9799 | H | 3.2092  | 1.9903  | -1.4707 |
| H | 5.7718  | 1.4897  | -0.7987 | H | 5.5936  | 1.8369  | -1.1966 |
| H | 5.5607  | 0.5332  | 0.652   | H | 5.4543  | 1.0379  | 0.3532  |
| H | 5.8937  | -0.9337 | -1.2746 | H | 5.932   | -0.6163 | -1.367  |
| H | 4.6318  | -0.1332 | -2.1813 | H | 4.6243  | -0.0423 | -2.3754 |
| H | 4.4591  | -1.2877 | 1.538   | H | 4.448   | -0.734  | 1.4638  |
| H | 3.9532  | -2.9074 | 1.0696  | H | 4.1234  | -2.442  | 1.1889  |
| H | 5.5103  | -2.3146 | 0.5705  | H | 5.6278  | -1.7562 | 0.6502  |
| H | -6.4942 | 1.7113  | -1.8073 | H | -7.2564 | 2.4082  | 0.0972  |
| H | -7.4807 | 2.3705  | -0.512  | H | -5.8678 | 2.1401  | 1.1458  |
| H | -7.4915 | -0.1518 | -0.7323 | H | -7.3017 | 0.091   | -0.6217 |
| H | -7.1688 | 0.4678  | 0.8878  | H | -7.2037 | 0.144   | 1.1399  |
| H | -5.2797 | 3.4742  | -0.5158 | H | -5.9307 | 1.8972  | -1.8932 |
| H | -5.5263 | 2.5595  | 0.9612  | H | -5.2119 | 3.2273  | -1.0062 |
| H | -3.0604 | -1.6808 | 0.1443  | H | -3.0011 | -1.7998 | 0.2338  |
| H | -2.489  | -0.6389 | -1.1291 | H | -2.4864 | -0.9707 | -1.2029 |
| H | -2.3677 | -0.1028 | 1.8872  | H | -2.3189 | 0.0316  | 1.695   |
| H | -1.0075 | 1.8797  | 1.3541  | H | -1.1135 | 1.9932  | 0.9175  |
| H | -1.1523 | 1.5791  | -0.3691 | H | -1.1557 | 1.4556  | -0.749  |
| H | -3.3778 | 2.2299  | 1.6053  | H | -3.502  | 2.3038  | 1.0017  |
| H | -2.7737 | 3.2793  | 0.3335  | H | -2.874  | 3.1408  | -0.4087 |
| H | -3.526  | 2.981   | -2.0584 | H | -3.4575 | 2.3136  | -2.773  |
| H | -2.6537 | 1.452   | -2.0883 | H | -2.5264 | 0.864   | -2.4212 |
| H | -4.3451 | 1.4979  | -2.5655 | H | -4.1888 | 0.7149  | -2.9816 |



|              |                  |                  |                  |              |                  |                  |                  |
|--------------|------------------|------------------|------------------|--------------|------------------|------------------|------------------|
| H            | -4.828           | -2.5352          | 0.099            | H            | -4.7764          | -2.6073          | 0.5438           |
| H            | 1.255            | 0.1606           | -1.7039          | H            | 1.2076           | -0.0382          | -1.9693          |
| H            | 3.9445           | 3.6799           | 2.7921           | H            | 3.3054           | 5.2119           | 0.2476           |
| H            | 3.4324           | 1.9162           | 2.783            | H            | 2.9569           | 4.3094           | -1.3235          |
| H            | -0.4374          | -1.5169          | 2.9477           | H            | -0.3073          | -1.1371          | 2.8922           |
| H            | 4.5984           | 4.8384           | 0.9162           | H            | 4.0602           | 4.1534           | 2.1685           |
| <b>1a-11</b> | <b>X axis(Å)</b> | <b>Y axis(Å)</b> | <b>Z axis(Å)</b> | <b>1a-12</b> | <b>X axis(Å)</b> | <b>Y axis(Å)</b> | <b>Z axis(Å)</b> |
| C            | 4.2662           | -2.8471          | -0.6763          | C            | 4.4549           | -2.6512          | -0.5739          |
| C            | 2.7513           | -2.8261          | -0.8656          | C            | 2.9557           | -2.7732          | -0.8425          |
| C            | 2.054            | -1.643           | -0.1826          | C            | 2.1185           | -1.6651          | -0.1916          |
| C            | 2.7697           | -0.2898          | -0.4605          | C            | 2.7127           | -0.2504          | -0.4566          |
| C            | 4.314            | -0.3162          | -0.2185          | C            | 4.235            | -0.1252          | -0.1199          |
| C            | 4.9282           | -1.5041          | -1.0048          | C            | 5.0072           | -1.2494          | -0.8605          |
| C            | 2.1188           | 0.9297           | 0.2313           | C            | 1.9015           | 0.91             | 0.1614           |
| C            | 2.7278           | 2.2713           | -0.2439          | C            | 2.4233           | 2.2983           | -0.276           |
| C            | 4.2664           | 2.2528           | -0.1065          | C            | 3.9384           | 2.4267           | -0.0185          |
| C            | 4.9132           | 1.0186           | -0.7506          | C            | 4.7371           | 1.2617           | -0.6203          |
| C            | 4.7334           | -0.4485          | 1.2661           | C            | 4.5708           | -0.2147          | 1.3889           |
| O            | 0.7128           | -1.5513          | -0.7828          | O            | 0.7941           | -1.7027          | -0.8306          |
| C            | 2.0441           | 3.4509           | 0.4355           | C            | 1.5673           | 3.3876           | 0.3502           |
| C            | -6.1344          | 0.1284           | -1.2686          | C            | -6.4562          | 0.423            | -0.3953          |
| C            | -5.6141          | 1.3863           | -0.5839          | C            | -5.4545          | 1.5515           | -0.6149          |
| C            | -4.2561          | 1.1799           | 0.0415           | C            | -4.072           | 1.2181           | -0.1282          |
| C            | -3.7762          | -0.0433          | 0.3734           | C            | -3.6412          | -0.034           | 0.1478           |
| C            | -4.6229          | -1.3241          | 0.2057           | C            | -4.5605          | -1.2569          | -0.0084          |
| C            | -6.0638          | -1.0452          | -0.3073          | C            | -5.8507          | -0.9132          | -0.8067          |
| C            | -2.3632          | -0.3289          | 0.8557           | C            | -2.2329          | -0.3517          | 0.6218           |
| C            | -1.6336          | -1.2409          | -0.1533          | C            | -1.5725          | -1.4429          | -0.2418          |
| C            | -2.4243          | -2.5289          | -0.4312          | C            | -2.43            | -2.7113          | -0.2642          |
| C            | -3.8842          | -2.2398          | -0.8071          | C            | -3.8365          | -2.396           | -0.7781          |
| C            | -4.793           | -2.0638          | 1.5558           | C            | -4.9672          | -1.7575          | 1.3973           |
| C            | -3.4807          | 2.4504           | 0.2035           | C            | -3.2085          | 2.4207           | 0.0603           |
| O            | -3.9942          | 3.5565           | 0.0668           | O            | -2.6035          | 2.6607           | 1.0989           |
| C            | -0.2153          | -1.5587          | 0.2514           | C            | -0.1558          | -1.7287          | 0.1853           |
| C            | 1.6857           | -1.9253          | 1.2604           | C            | 1.7335           | -1.9863          | 1.24             |
| O            | 2.5885           | -0.0542          | -1.8912          | O            | 2.6006           | -0.0556          | -1.9006          |
| C            | 2.5891           | 4.3012           | 1.3216           | C            | 1.9034           | 4.1927           | 1.3715           |
| O            | 2.4329           | -2.2378          | 2.1741           | O            | 2.4746           | -2.2784          | 2.1654           |
| C            | 0.2516           | -1.7851          | 1.4755           | C            | 0.2905           | -1.9203          | 1.423            |
| C            | 0.6262           | 3.7365           | 0.0537           | C            | 0.2102           | 3.6081           | -0.2401          |
| O            | -0.0303          | 3.0057           | -0.6793          | O            | -0.2029          | 2.9946           | -1.2187          |
| H            | 4.5036           | -3.1498          | 0.3488           | H            | 4.6657           | -2.9381          | 0.4616           |
| H            | 4.6953           | -3.6222          | -1.3229          | H            | 4.9887           | -3.3777          | -1.1985          |
| H            | 2.5342           | -2.8021          | -1.9422          | H            | 2.791            | -2.7628          | -1.9284          |
| H            | 2.33             | -3.775           | -0.5094          | H            | 2.6082           | -3.7598          | -0.5096          |
| H            | 4.8383           | -1.3278          | -2.0846          | H            | 4.9719           | -1.0786          | -1.9443          |
| H            | 6.0039           | -1.5763          | -0.7997          | H            | 6.0693           | -1.2209          | -0.5858          |

|              |                  |                  |                  |              |                  |                  |                  |
|--------------|------------------|------------------|------------------|--------------|------------------|------------------|------------------|
| H            | 1.0496           | 0.9373           | -0.0022          | H            | 0.8578           | 0.833            | -0.1636          |
| H            | 2.1926           | 0.8486           | 1.3217           | H            | 1.8919           | 0.8391           | 1.2552           |
| H            | 2.5217           | 2.3799           | -1.3185          | H            | 2.2988           | 2.3879           | -1.3646          |
| H            | 4.6874           | 3.1524           | -0.5732          | H            | 4.3055           | 3.3666           | -0.4499          |
| H            | 4.5576           | 2.2888           | 0.9496           | H            | 4.1473           | 2.4793           | 1.0558           |
| H            | 5.9952           | 1.0476           | -0.5682          | H            | 5.7987           | 1.3922           | -0.3738          |
| H            | 4.7959           | 1.0864           | -1.8397          | H            | 4.6784           | 1.3202           | -1.7147          |
| H            | 4.2089           | 0.2509           | 1.9217           | H            | 3.9158           | 0.4035           | 2.0077           |
| H            | 4.577            | -1.4494          | 1.6665           | H            | 4.5243           | -1.2314          | 1.7771           |
| H            | 5.8064           | -0.2502          | 1.3802           | H            | 5.5987           | 0.1211           | 1.5744           |
| H            | -7.1704          | 0.2865           | -1.5894          | H            | -6.7651          | 0.3945           | 0.656            |
| H            | -5.5501          | -0.0821          | -2.1723          | H            | -7.3616          | 0.6184           | -0.9814          |
| H            | -6.3175          | 1.7119           | 0.1924           | H            | -5.8291          | 2.4507           | -0.1105          |
| H            | -5.5759          | 2.1797           | -1.3401          | H            | -5.3988          | 1.7857           | -1.6855          |
| H            | -6.7284          | -0.8232          | 0.5396           | H            | -6.5979          | -1.7075          | -0.6852          |
| H            | -6.479           | -1.9399          | -0.7881          | H            | -5.6279          | -0.8665          | -1.8816          |
| H            | -1.7693          | 0.5765           | 0.9973           | H            | -1.5835          | 0.5285           | 0.5982           |
| H            | -2.4081          | -0.7903          | 1.8487           | H            | -2.2834          | -0.6637          | 1.6724           |
| H            | -1.579           | -0.6781          | -1.0978          | H            | -1.5269          | -1.0523          | -1.2697          |
| H            | -1.9526          | -3.0854          | -1.2514          | H            | -1.9724          | -3.4638          | -0.9188          |
| H            | -2.3924          | -3.192           | 0.442            | H            | -2.4855          | -3.1609          | 0.7345           |
| H            | -3.8944          | -1.7752          | -1.8021          | H            | -3.7472          | -2.1221          | -1.8386          |
| H            | -4.4148          | -3.1951          | -0.9094          | H            | -4.4408          | -3.3118          | -0.7502          |
| H            | -5.4426          | -2.9397          | 1.4392           | H            | -5.6585          | -2.6052          | 1.327            |
| H            | -3.8504          | -2.425           | 1.9757           | H            | -4.1072          | -2.0929          | 1.9858           |
| H            | -5.2504          | -1.4083          | 2.3067           | H            | -5.464           | -0.9731          | 1.9788           |
| H            | -2.4218          | 2.3605           | 0.4738           | H            | -3.196           | 3.1159           | -0.7963          |
| H            | 1.6312           | -0.1443          | -2.0718          | H            | 1.6643           | -0.2162          | -2.1332          |
| H            | 2.0361           | 5.1326           | 1.7505           | H            | 1.2304           | 4.9528           | 1.759            |
| H            | 3.6158           | 4.2026           | 1.6585           | H            | 2.8642           | 4.1192           | 1.8696           |
| H            | -0.2449          | -1.8385          | 2.4252           | H            | -0.2267          | -1.9679          | 2.362            |
| H            | 0.1846           | 4.6498           | 0.488            | H            | -0.4114          | 4.3723           | 0.257            |
| <b>1a-13</b> | <b>X axis(Å)</b> | <b>Y axis(Å)</b> | <b>Z axis(Å)</b> | <b>1a-14</b> | <b>X axis(Å)</b> | <b>Y axis(Å)</b> | <b>Z axis(Å)</b> |
| C            | -2.943           | -3.3791          | 1.1927           | C            | -3.751           | -2.927           | 1.3252           |
| C            | -1.5465          | -2.7865          | 1.0231           | C            | -2.231           | -2.8162          | 1.2357           |
| C            | -1.5001          | -1.5399          | 0.1283           | C            | -1.7448          | -1.6688          | 0.3383           |
| C            | -2.6084          | -0.5118          | 0.4898           | C            | -2.4706          | -0.3299          | 0.6548           |
| C            | -4.0424          | -1.1271          | 0.6135           | C            | -4.0324          | -0.4462          | 0.6957           |
| C            | -3.9919          | -2.3334          | 1.5876           | C            | -4.4281          | -1.5941          | 1.6621           |
| C            | -2.6143          | 0.7545           | -0.3957          | C            | -2.0129          | 0.865            | -0.2115          |
| C            | -3.6006          | 1.8286           | 0.1245           | C            | -2.6593          | 2.195            | 0.2452           |
| C            | -5.0095          | 1.2358           | 0.3376           | C            | -4.1878          | 2.0999           | 0.3905           |
| C            | -4.9934          | -0.0386          | 1.1919           | C            | -4.6183          | 0.8925           | 1.2313           |
| C            | -4.6601          | -1.6084          | -0.7225          | C            | -4.6944          | -0.7132          | -0.6781          |
| O            | -0.2066          | -0.8913          | 0.3972           | O            | -0.3193          | -1.4701          | 0.6569           |
| C            | -3.5595          | 3.0628           | -0.7637          | C            | -2.2372          | 3.3718           | -0.6131          |
| C            | 6.6176           | 1.2727           | 0.8053           | C            | 6.5015           | -0.1801          | 0.4286           |

|   |         |         |         |   |         |         |         |
|---|---------|---------|---------|---|---------|---------|---------|
| C | 6.6778  | -0.0612 | 0.069   | C | 5.7822  | 0.7699  | 1.378   |
| C | 5.3389  | -0.7373 | -0.0561 | C | 4.2843  | 0.7582  | 1.1865  |
| C | 4.1557  | -0.1355 | 0.2044  | C | 3.6882  | 0.3099  | 0.0546  |
| C | 4.0736  | 1.359   | 0.5612  | C | 4.5107  | -0.1175 | -1.1798 |
| C | 5.4264  | 2.0889  | 0.3221  | C | 6.0423  | 0.0749  | -0.9959 |
| C | 2.8084  | -0.8427 | 0.1734  | C | 2.1932  | 0.0798  | -0.1156 |
| C | 1.8282  | -0.1411 | -0.7789 | C | 1.8975  | -1.4116 | -0.3924 |
| C | 1.6637  | 1.3369  | -0.3899 | C | 2.7165  | -1.9254 | -1.5917 |
| C | 3.0152  | 2.0524  | -0.34   | C | 4.2112  | -1.6159 | -1.4447 |
| C | 3.6872  | 1.518   | 2.0498  | C | 4.1266  | 0.7275  | -2.4198 |
| C | 5.4379  | -2.1576 | -0.5029 | C | 3.5287  | 1.2454  | 2.3828  |
| O | 4.7235  | -2.6465 | -1.3688 | O | 4.0824  | 1.6055  | 3.4161  |
| C | 0.493   | -0.8372 | -0.8004 | C | 0.4073  | -1.6351 | -0.5192 |
| C | -1.3432 | -1.8805 | -1.3422 | C | -1.6493 | -2.0792 | -1.1173 |
| O | -2.2583 | -0.0336 | 1.8264  | O | -2.0495 | 0.0214  | 2.012   |
| C | -4.4967 | 3.4615  | -1.6396 | C | -1.5475 | 4.4196  | -0.1314 |
| O | -2.1248 | -2.492  | -2.0535 | O | -2.5446 | -2.4858 | -1.8403 |
| C | -0.076  | -1.3911 | -1.8653 | C | -0.2791 | -1.9905 | -1.6009 |
| C | -2.3688 | 3.9561  | -0.6283 | C | -2.5864 | 3.4121  | -2.06   |
| O | -1.4289 | 3.7105  | 0.1184  | O | -3.1689 | 2.5027  | -2.6364 |
| H | -3.239  | -3.8891 | 0.2703  | H | -4.1457 | -3.329  | 0.3864  |
| H | -2.9086 | -4.1568 | 1.9653  | H | -4.01   | -3.6622 | 2.0968  |
| H | -1.1512 | -2.5339 | 2.0166  | H | -1.828  | -2.6815 | 2.2487  |
| H | -0.8716 | -3.5604 | 0.6351  | H | -1.8195 | -3.7731 | 0.8893  |
| H | -3.7706 | -1.9867 | 2.6054  | H | -4.166  | -1.3238 | 2.6933  |
| H | -4.9758 | -2.8167 | 1.641   | H | -5.5165 | -1.7347 | 1.6547  |
| H | -1.6087 | 1.1908  | -0.4043 | H | -0.9252 | 0.9888  | -0.1301 |
| H | -2.8476 | 0.5021  | -1.4364 | H | -2.223  | 0.6641  | -1.2658 |
| H | -3.2622 | 2.1521  | 1.1194  | H | -2.2772 | 2.3898  | 1.2586  |
| H | -5.6505 | 1.9798  | 0.8275  | H | -4.5685 | 3.0129  | 0.8664  |
| H | -5.4834 | 1.0075  | -0.6237 | H | -4.6733 | 2.0495  | -0.5902 |
| H | -6.0161 | -0.4297 | 1.2685  | H | -5.7148 | 0.8464  | 1.2538  |
| H | -4.7008 | 0.2248  | 2.2164  | H | -4.3091 | 1.0577  | 2.2714  |
| H | -4.5532 | -0.8784 | -1.5285 | H | -4.3036 | -0.069  | -1.4696 |
| H | -4.2379 | -2.549  | -1.0743 | H | -4.5872 | -1.7449 | -1.0105 |
| H | -5.7341 | -1.7981 | -0.6026 | H | -5.7759 | -0.5361 | -0.625  |
| H | 6.5517  | 1.1026  | 1.8861  | H | 7.584   | -0.0266 | 0.5056  |
| H | 7.5465  | 1.8284  | 0.6325  | H | 6.3071  | -1.2211 | 0.7131  |
| H | 7.3877  | -0.7126 | 0.5928  | H | 6.1493  | 1.7938  | 1.2344  |
| H | 7.0782  | 0.1011  | -0.94   | H | 6.046   | 0.472   | 2.3999  |
| H | 5.426   | 3.068   | 0.8171  | H | 6.3281  | 1.1026  | -1.2607 |
| H | 5.5649  | 2.2902  | -0.7491 | H | 6.5957  | -0.5772 | -1.6833 |
| H | 2.8893  | -1.8969 | -0.1041 | H | 1.622   | 0.3852  | 0.7631  |
| H | 2.4028  | -0.8569 | 1.1935  | H | 1.8123  | 0.7078  | -0.9299 |
| H | 2.2559  | -0.1765 | -1.7915 | H | 2.2272  | -1.988  | 0.485   |
| H | 1.0189  | 1.8448  | -1.1187 | H | 2.5896  | -3.0113 | -1.6884 |
| H | 1.1615  | 1.4306  | 0.5809  | H | 2.3489  | -1.4888 | -2.5277 |

|              |                  |                  |                  |              |                  |                  |                  |
|--------------|------------------|------------------|------------------|--------------|------------------|------------------|------------------|
| H            | 3.3941           | 2.1142           | -1.3697          | H            | 4.609            | -2.2269          | -0.6236          |
| H            | 2.8596           | 3.0872           | -0.0091          | H            | 4.7282           | -1.9491          | -2.3538          |
| H            | 3.6741           | 2.5748           | 2.3403           | H            | 4.7408           | 0.4491           | -3.2845          |
| H            | 2.694            | 1.1156           | 2.272            | H            | 3.0826           | 0.6082           | -2.7215          |
| H            | 4.395            | 1.0021           | 2.7079           | H            | 4.2848           | 1.796            | -2.2298          |
| H            | 6.2462           | -2.7368          | -0.0255          | H            | 2.4359           | 1.292            | 2.3003           |
| H            | -1.3267          | 0.2618           | 1.7813           | H            | -1.09            | -0.1548          | 2.0631           |
| H            | -4.3973          | 4.3685           | -2.2294          | H            | -1.25            | 5.2626           | -0.7481          |
| H            | -5.4052          | 2.8927           | -1.8079          | H            | -1.2611          | 4.4661           | 0.916            |
| H            | 0.2675           | -1.4774          | -2.8784          | H            | 0.0332           | -2.1976          | -2.6067          |
| H            | -2.376           | 4.8654           | -1.253           | H            | -2.2789          | 4.3223           | -2.6025          |
| <b>1a-15</b> | <b>X axis(Å)</b> | <b>Y axis(Å)</b> | <b>Z axis(Å)</b> | <b>1a-16</b> | <b>X axis(Å)</b> | <b>Y axis(Å)</b> | <b>Z axis(Å)</b> |
| C            | -3.7402          | -2.8519          | 1.626            | C            | 3.7463           | -3.2895          | -0.2177          |
| C            | -2.2229          | -2.7096          | 1.5427           | C            | 2.2557           | -3.0536          | -0.4482          |
| C            | -1.7444          | -1.7287          | 0.4625           | C            | 1.7745           | -1.6608          | -0.0175          |
| C            | -2.5261          | -0.3855          | 0.4949           | C            | 2.6964           | -0.5291          | -0.5554          |
| C            | -4.0836          | -0.5507          | 0.5311           | C            | 4.2191           | -0.7588          | -0.268           |
| C            | -4.4626          | -1.5022          | 1.6962           | C            | 4.6232           | -2.1662          | -0.7818          |
| C            | -2.0978          | 0.6241           | -0.5942          | C            | 2.2531           | 0.8976           | -0.1597          |
| C            | -2.7765          | 2.0071           | -0.4152          | C            | 3.1193           | 1.9854           | -0.8388          |
| C            | -4.3044          | 1.881            | -0.2703          | C            | 4.6289           | 1.7464           | -0.6635          |
| C            | -4.7202          | 0.8462           | 0.7821           | C            | 5.0393           | 0.3173           | -1.037           |
| C            | -4.7118          | -1.1056          | -0.7711          | C            | 4.6159           | -0.6505          | 1.2246           |
| O            | -0.3396          | -1.419           | 0.7862           | O            | 0.4521           | -1.4696          | -0.6384          |
| C            | -2.4322          | 3.0143           | -1.5016          | C            | 2.7103           | 3.3888           | -0.435           |
| C            | 6.5568           | 0.9058           | -2.00E-04        | C            | -6.3082          | 0.4201           | -1.4322          |
| C            | 5.7061           | 1.347            | 1.1833           | C            | -5.9244          | 1.5906           | -0.5352          |
| C            | 4.2324           | 1.0432           | 1.0304           | C            | -4.6414          | 1.3471           | 0.2227           |
| C            | 3.7311           | 0.194            | 0.0988           | C            | -4.1201          | 0.111            | 0.4153           |
| C            | 4.6613           | -0.564           | -0.8718          | C            | -4.8677          | -1.1646          | -0.0291          |
| C            | 6.1528           | -0.4902          | -0.4422          | C            | -6.2687          | -0.8724          | -0.636           |
| C            | 2.2506           | -0.106           | -0.1071          | C            | -2.7348          | -0.177           | 0.9752           |
| C            | 1.9375           | -1.6164          | -0.1056          | C            | -1.8639          | -0.8881          | -0.0851          |
| C            | 2.8024           | -2.3388          | -1.1494          | C            | -2.5553          | -2.1554          | -0.617           |
| C            | 4.2867           | -2.0694          | -0.9117          | C            | -3.9884          | -1.8792          | -1.0877          |
| C            | 4.5263           | 0.0503           | -2.2855          | C            | -5.1174          | -2.109           | 1.1726           |
| C            | 3.3859           | 1.7981           | 2.0089           | C            | -3.9801          | 2.6025           | 0.6975           |
| O            | 3.8668           | 2.4915           | 2.899            | O            | -4.3965          | 3.721            | 0.4159           |
| C            | 0.4518           | -1.8479          | -0.2742          | C            | -0.4635          | -1.2153          | 0.3785           |
| C            | -1.5766          | -2.3874          | -0.8923          | C            | 1.4006           | -1.6084          | 1.4502           |
| O            | -2.1521          | 0.2417           | 1.759            | O            | 2.5418           | -0.5704          | -2.0102          |
| C            | -2.0707          | 2.7456           | -2.7674          | C            | 2.2355           | 4.2933           | -1.3079          |
| O            | -2.444           | -2.8641          | -1.6064          | O            | 2.109            | -1.8564          | 2.4126           |
| C            | -0.1773          | -2.426           | -1.2925          | C            | -0.0023          | -1.2596          | 1.6246           |
| C            | -2.4753          | 4.4594           | -1.125           | C            | 2.8254           | 3.8284           | 0.983            |
| O            | -2.7656          | 4.8486           | -0.001           | O            | 3.1979           | 3.0914           | 1.8869           |
| H            | -4.1009          | -3.4358          | 0.773            | H            | 3.936            | -3.4205          | 0.8526           |

|              |                  |                  |                  |              |                  |                  |                  |
|--------------|------------------|------------------|------------------|--------------|------------------|------------------|------------------|
| H            | -3.9948          | -3.4379          | 2.5174           | H            | 4.0346           | -4.2365          | -0.6898          |
| H            | -1.8489          | -2.3803          | 2.5218           | H            | 2.0374           | -3.1999          | -1.5148          |
| H            | -1.7768          | -3.7             | 1.3844           | H            | 1.6827           | -3.8333          | 0.0703           |
| H            | -4.2264          | -1.0311          | 2.6592           | H            | 4.563            | -2.1974          | -1.8776          |
| H            | -5.5461          | -1.6769          | 1.7037           | H            | 5.6718           | -2.3722          | -0.5317          |
| H            | -1.0127          | 0.7842           | -0.5477          | H            | 1.2149           | 1.0658           | -0.4751          |
| H            | -2.3133          | 0.2087           | -1.5834          | H            | 2.2664           | 1.0039           | 0.9287           |
| H            | -2.3885          | 2.4122           | 0.53             | H            | 2.9294           | 1.8987           | -1.9192          |
| H            | -4.7349          | 2.8502           | 0.0116           | H            | 5.1871           | 2.4487           | -1.296           |
| H            | -4.7537          | 1.6245           | -1.2378          | H            | 4.943            | 1.956            | 0.3647           |
| H            | -5.8151          | 0.769            | 0.7924           | H            | 6.1118           | 0.1913           | -0.8399          |
| H            | -4.4424          | 1.222            | 1.7753           | H            | 4.9217           | 0.1873           | -2.1205          |
| H            | -4.3441          | -0.6032          | -1.6692          | H            | 4.1856           | 0.2258           | 1.7155           |
| H            | -4.5494          | -2.1747          | -0.9025          | H            | 4.3317           | -1.5261          | 1.8068           |
| H            | -5.8014          | -0.9767          | -0.7568          | H            | 5.7055           | -0.5737          | 1.3284           |
| H            | 7.6151           | 0.9166           | 0.2852           | H            | -7.3151          | 0.5806           | -1.8345          |
| H            | 6.4501           | 1.6176           | -0.8267          | H            | -5.629           | 0.3617           | -2.2911          |
| H            | 5.8633           | 2.4238           | 1.322            | H            | -6.7276          | 1.7893           | 0.1853           |
| H            | 6.0677           | 0.8498           | 2.0927           | H            | -5.837           | 2.4772           | -1.1744          |
| H            | 6.8042           | -0.8191          | -1.2618          | H            | -7.0178          | -0.796           | 0.1646           |
| H            | 6.3418           | -1.1797          | 0.3922           | H            | -6.5918          | -1.7062          | -1.2719          |
| H            | 1.6254           | 0.3694           | 0.6508           | H            | -2.2101          | 0.7279           | 1.2886           |
| H            | 1.9345           | 0.3385           | -1.0601          | H            | -2.8303          | -0.7836          | 1.8829           |
| H            | 2.2099           | -2.0203          | 0.8806           | H            | -1.7585          | -0.1882          | -0.928           |
| H            | 2.6282           | -3.421           | -1.0955          | H            | -1.9856          | -2.5674          | -1.46            |
| H            | 2.5299           | -2.0287          | -2.1651          | H            | -2.5612          | -2.9359          | 0.1538           |
| H            | 4.5635           | -2.5434          | 0.0403           | H            | -3.9354          | -1.2699          | -1.9996          |
| H            | 4.8698           | -2.5807          | -1.6885          | H            | -4.4498          | -2.8307          | -1.3817          |
| H            | 5.204            | -0.4414          | -2.993           | H            | -5.6948          | -2.988           | 0.8621           |
| H            | 3.5148           | -0.0473          | -2.6915          | H            | -4.197           | -2.4816          | 1.6305           |
| H            | 4.7653           | 1.1194           | -2.2867          | H            | -5.6854          | -1.5994          | 1.9602           |
| H            | 2.2975           | 1.7114           | 1.9053           | H            | -3.0964          | 2.4893           | 1.338            |
| H            | -1.1827          | 0.1611           | 1.8451           | H            | 1.584            | -0.6517          | -2.1869          |
| H            | -1.8328          | 3.5275           | -3.4836          | H            | 1.9443           | 5.2979           | -1.0155          |
| H            | -2.0139          | 1.7313           | -3.1471          | H            | 2.1251           | 4.049            | -2.3611          |
| H            | 0.1914           | -2.8483          | -2.2078          | H            | -0.4863          | -1.1094          | 2.5706           |
| H            | -2.2256          | 5.1739           | -1.9277          | H            | 2.5436           | 4.8759           | 1.185            |
| <b>1a-17</b> | <b>X axis(Å)</b> | <b>Y axis(Å)</b> | <b>Z axis(Å)</b> | <b>1a-18</b> | <b>X axis(Å)</b> | <b>Y axis(Å)</b> | <b>Z axis(Å)</b> |
| C            | 3.4596           | -3.5133          | -0.1466          | C            | 2.6238           | -3.5588          | -1.1869          |
| C            | 2.0229           | -3.0886          | -0.437           | C            | 1.2764           | -2.8608          | -1.0245          |
| C            | 1.6723           | -1.6803          | 0.0655           | C            | 1.3131           | -1.6359          | -0.0992          |
| C            | 2.7536           | -0.6306          | -0.3137          | C            | 2.5053           | -0.69            | -0.4156          |
| C            | 4.2185           | -1.0633          | 0.0351           | C            | 3.8878           | -1.4176          | -0.5321          |
| C            | 4.4898           | -2.4631          | -0.5759          | C            | 3.7577           | -2.5901          | -1.5393          |
| C            | 2.4578           | 0.7976           | 0.1978           | C            | 2.6014           | 0.5426           | 0.5121           |
| C            | 3.4658           | 1.8399           | -0.3527          | C            | 3.6925           | 1.5431           | 0.0501           |
| C            | 4.9245           | 1.4029           | -0.1233          | C            | 5.0475           | 0.849            | -0.1803          |

|   |         |         |         |   |         |         |         |
|---|---------|---------|---------|---|---------|---------|---------|
| C | 5.1983  | -0.031  | -0.5928 | C | 4.9359  | -0.3988 | -1.0645 |
| C | 4.5381  | -1.126  | 1.5491  | C | 4.442   | -1.982  | 0.7992  |
| O | 0.4329  | -1.2956 | -0.6329 | O | 0.0779  | -0.8805 | -0.3772 |
| C | 3.2507  | 3.2511  | 0.1718  | C | 3.8662  | 2.7418  | 0.9696  |
| C | -7.014  | 0.4915  | -0.6614 | C | -6.3203 | 1.9536  | 0.2986  |
| C | -6.2333 | 1.7001  | -0.162  | C | -6.6736 | 0.4874  | 0.0808  |
| C | -4.8761 | 1.3613  | 0.4122  | C | -5.4535 | -0.3914 | -0.0542 |
| C | -4.2594 | 0.1666  | 0.2326  | C | -4.2247 | 0.091   | -0.3605 |
| C | -4.9055 | -0.9463 | -0.6208 | C | -4.0024 | 1.5761  | -0.7207 |
| C | -6.104  | -0.4249 | -1.4615 | C | -5.319  | 2.4021  | -0.7514 |
| C | -2.9129 | -0.225  | 0.8289  | C | -2.9306 | -0.7075 | -0.2958 |
| C | -1.9211 | -0.7447 | -0.2317 | C | -1.9717 | -0.0928 | 0.7455  |
| C | -2.5372 | -1.9184 | -1.0048 | C | -1.7299 | 1.404   | 0.4894  |
| C | -3.8748 | -1.5231 | -1.6275 | C | -3.0434 | 2.1797  | 0.3385  |
| C | -5.4126 | -2.0713 | 0.3126  | C | -3.3835 | 1.7156  | -2.1336 |
| C | -4.2945 | 2.4809  | 1.2189  | C | -5.7235 | -1.8365 | 0.2231  |
| O | -4.8285 | 3.5815  | 1.3068  | O | -6.8098 | -2.2452 | 0.6187  |
| C | -0.5695 | -1.1411 | 0.3186  | C | -0.6656 | -0.8415 | 0.7935  |
| C | 1.1901  | -1.6762 | 1.5026  | C | 1.096   | -1.9975 | 1.3587  |
| O | 2.6922  | -0.5325 | -1.769  | O | 2.2161  | -0.1461 | -1.7394 |
| C | 2.6969  | 3.601   | 1.3448  | C | 3.6188  | 2.7888  | 2.2894  |
| O | 1.8293  | -1.9378 | 2.5089  | O | 1.8211  | -2.6629 | 2.0807  |
| C | -0.2216 | -1.3285 | 1.5875  | C | -0.1623 | -1.4595 | 1.856   |
| C | 3.6753  | 4.3766  | -0.7143 | C | 4.3408  | 4.0134  | 0.3457  |
| O | 4.1789  | 4.2057  | -1.8173 | O | 4.5816  | 4.1227  | -0.8499 |
| H | 3.566   | -3.7416 | 0.919   | H | 2.8625  | -4.1123 | -0.2729 |
| H | 3.6677  | -4.4517 | -0.6747 | H | 2.5415  | -4.3128 | -1.9791 |
| H | 1.8569  | -3.1373 | -1.522  | H | 0.9205  | -2.5538 | -2.0175 |
| H | 1.3353  | -3.8296 | -0.0091 | H | 0.5354  | -3.5876 | -0.6673 |
| H | 4.4883  | -2.4024 | -1.672  | H | 3.5803  | -2.2004 | -2.5502 |
| H | 5.4922  | -2.8101 | -0.2945 | H | 4.701   | -3.1485 | -1.5926 |
| H | 1.4555  | 1.1085  | -0.125  | H | 1.6449  | 1.0815  | 0.5161  |
| H | 2.4514  | 0.8008  | 1.2921  | H | 2.7821  | 0.2141  | 1.54    |
| H | 3.2996  | 1.8743  | -1.4386 | H | 3.3524  | 1.9308  | -0.9205 |
| H | 5.6055  | 2.0762  | -0.6591 | H | 5.7486  | 1.5466  | -0.6559 |
| H | 5.183   | 1.4991  | 0.9386  | H | 5.5003  | 0.5796  | 0.782   |
| H | 6.2356  | -0.2938 | -0.3484 | H | 5.9234  | -0.8724 | -1.1381 |
| H | 5.1375  | -0.0611 | -1.6883 | H | 4.6829  | -0.0859 | -2.0856 |
| H | 4.2026  | -0.2393 | 2.0925  | H | 4.3952  | -1.2618 | 1.6198  |
| H | 4.1062  | -1.9965 | 2.0416  | H | 3.9302  | -2.8863 | 1.1263  |
| H | 5.6204  | -1.2081 | 1.7097  | H | 5.4951  | -2.2685 | 0.6857  |
| H | -7.4554 | -0.0474 | 0.1847  | H | -7.2285 | 2.5637  | 0.2336  |
| H | -7.8495 | 0.8279  | -1.2863 | H | -5.9109 | 2.1     | 1.3052  |
| H | -6.8514 | 2.2081  | 0.5884  | H | -7.2875 | 0.3803  | -0.8221 |
| H | -6.0902 | 2.4052  | -0.9911 | H | -7.29   | 0.1699  | 0.9303  |
| H | -6.6867 | -1.265  | -1.8599 | H | -5.8001 | 2.3085  | -1.7351 |
| H | -5.7402 | 0.1342  | -2.3346 | H | -5.1039 | 3.4703  | -0.6222 |

|              |                  |                  |                  |              |                  |                  |                  |
|--------------|------------------|------------------|------------------|--------------|------------------|------------------|------------------|
| H            | -2.4331          | 0.603            | 1.354            | H            | -3.0907          | -1.7533          | -0.0243          |
| H            | -3.0899          | -0.9933          | 1.5923           | H            | -2.4704          | -0.7384          | -1.2903          |
| H            | -1.7444          | 0.0781           | -0.9403          | H            | -2.4559          | -0.1803          | 1.7297           |
| H            | -1.8612          | -2.2417          | -1.8067          | H            | -1.1581          | 1.834            | 1.322            |
| H            | -2.6687          | -2.7856          | -0.346           | H            | -1.1128          | 1.5493           | -0.4056          |
| H            | -3.669           | -0.7785          | -2.4091          | H            | -3.5392          | 2.2065           | 1.3178           |
| H            | -4.2996          | -2.3951          | -2.1413          | H            | -2.8077          | 3.2213           | 0.0851           |
| H            | -5.922           | -2.8555          | -0.2592          | H            | -3.2688          | 2.7719           | -2.4046          |
| H            | -4.6016          | -2.5557          | 0.8653           | H            | -2.3948          | 1.257            | -2.222           |
| H            | -6.1207          | -1.6912          | 1.0571           | H            | -4.0238          | 1.246            | -2.89            |
| H            | -3.3516          | 2.2852           | 1.7432           | H            | -4.903           | -2.5415          | 0.0384           |
| H            | 1.75             | -0.4384          | -2.01            | H            | 1.2871           | 0.1558           | -1.7273          |
| H            | 2.571            | 4.6383           | 1.6433           | H            | 3.7623           | 3.6912           | 2.8775           |
| H            | 2.36             | 2.8635           | 2.0651           | H            | 3.2774           | 1.9202           | 2.8421           |
| H            | -0.7875          | -1.2677          | 2.4974           | H            | -0.5435          | -1.5679          | 2.8536           |
| H            | 3.5083           | 5.3919           | -0.3164          | H            | 4.4649           | 4.8689           | 1.0313           |
| <b>1a-19</b> | <b>X axis(Å)</b> | <b>Y axis(Å)</b> | <b>Z axis(Å)</b> | <b>1a-20</b> | <b>X axis(Å)</b> | <b>Y axis(Å)</b> | <b>Z axis(Å)</b> |
| C            | 4.0233           | -2.7213          | -1.2544          | C            | 2.8694           | -3.4584          | -1.0039          |
| C            | 2.497            | -2.7601          | -1.276           | C            | 1.4863           | -2.8387          | -0.8226          |
| C            | 1.8388           | -1.6953          | -0.3871          | C            | 1.4848           | -1.5405          | -0.0033          |
| C            | 2.4501           | -0.2833          | -0.6158          | C            | 2.5916           | -0.5501          | -0.4616          |
| C            | 4.0143           | -0.2452          | -0.5466          | C            | 4.0131           | -1.1911          | -0.5972          |
| C            | 4.589            | -1.3197          | -1.5077          | C            | 3.9151           | -2.4516          | -1.4959          |
| C            | 1.8203           | 0.8338           | 0.2456           | C            | 2.6428           | 0.7648           | 0.3486           |
| C            | 2.3521           | 2.2328           | -0.141           | C            | 3.6228           | 1.7943           | -0.2656          |
| C            | 3.8888           | 2.2978           | -0.1796          | C            | 5.0162           | 1.1706           | -0.4943          |
| C            | 4.4993           | 1.1607           | -1.0084          | C            | 4.9555           | -0.1512          | -1.271           |
| C            | 4.601            | -0.4876          | 0.8653           | C            | 4.6709           | -1.6016          | 0.7432           |
| O            | 0.4269           | -1.6253          | -0.7985          | O            | 0.1905           | -0.8917          | -0.2677          |
| C            | 1.739            | 3.328            | 0.7088           | C            | 3.6303           | 3.0771           | 0.5524           |
| C            | -6.4972          | 0.7587           | -0.2972          | C            | -6.6044          | 1.3562           | -0.6824          |
| C            | -5.603           | 1.1664           | -1.4619          | C            | -6.6822          | 0.0351           | 0.0725           |
| C            | -4.1398          | 0.9089           | -1.2173          | C            | -5.3593          | -0.6776          | 0.1757           |
| C            | -3.6607          | 0.0987           | -0.2439          | C            | -4.16            | -0.0903          | -0.0486          |
| C            | -4.6033          | -0.6171          | 0.7377           | C            | -4.0568          | 1.3934           | -0.4481          |
| C            | -6.0777          | -0.6008          | 0.2448           | C            | -5.3936          | 2.155            | -0.2223          |
| C            | -2.1792          | -0.166           | -0.0172          | C            | -2.8222          | -0.8131          | 0.0514           |
| C            | -1.8429          | -1.6644          | 0.1222           | C            | -1.8022          | -0.0546          | 0.9199           |
| C            | -2.7132          | -2.3135          | 1.2067           | C            | -1.6335          | 1.3936           | 0.4439           |
| C            | -4.1966          | -2.1049          | 0.9034           | C            | -2.9797          | 2.113            | 0.4054           |
| C            | -4.5309          | 0.0998           | 2.1069           | C            | -3.6854          | 1.484            | -1.9472          |
| C            | -3.2567          | 1.6843           | -2.1415          | C            | -5.5173          | -2.125           | 0.5151           |
| O            | -2.2313          | 2.2546           | -1.7914          | O            | -4.8548          | -3.0263          | 0.0195           |
| C            | -0.3565          | -1.8362          | 0.3324           | C            | -0.472           | -0.7616          | 0.9447           |
| C            | 1.6825           | -2.1617          | 1.0469           | C            | 1.3725           | -1.7891          | 1.4895           |
| O            | 2.0947           | 0.0631           | -1.9925          | O            | 2.202            | -0.1445          | -1.8107          |
| C            | 0.9179           | 4.2668           | 0.209            | C            | 4.6082           | 3.5151           | 1.3628           |

|             |                  |                  |                  |             |                  |                  |                  |
|-------------|------------------|------------------|------------------|-------------|------------------|------------------|------------------|
| O           | 2.5575           | -2.5392          | 1.8099           | O           | 2.1706           | -2.3633          | 2.2135           |
| C           | 0.2828           | -2.1692          | 1.4493           | C           | 0.127            | -1.2557          | 2.0224           |
| C           | 2.0157           | 3.3941           | 2.1696           | C           | 2.4429           | 3.9751           | 0.4185           |
| O           | 2.6946           | 2.5673           | 2.7651           | O           | 1.4654           | 3.6962           | -0.2654          |
| H           | 4.3874           | -3.112           | -0.2985          | H           | 3.1917           | -3.9167          | -0.0633          |
| H           | 4.4081           | -3.4039          | -2.0218          | H           | 2.7997           | -4.2801          | -1.7271          |
| H           | 2.1561           | -2.6306          | -2.3121          | H           | 1.0596           | -2.6406          | -1.8154          |
| H           | 2.1575           | -3.763           | -0.9864          | H           | 0.8168           | -3.5792          | -0.3661          |
| H           | 4.3765           | -1.0441          | -2.5489          | H           | 3.662            | -2.1624          | -2.5242          |
| H           | 5.6826           | -1.3552          | -1.4227          | H           | 4.8912           | -2.95            | -1.5546          |
| H           | 0.7336           | 0.851            | 0.0971           | H           | 1.643            | 1.2137           | 0.3659           |
| H           | 1.9838           | 0.6285           | 1.3077           | H           | 2.9091           | 0.5694           | 1.3937           |
| H           | 2.0234           | 2.414            | -1.1754          | H           | 3.2523           | 2.0668           | -1.2643          |
| H           | 4.2042           | 3.2566           | -0.6111          | H           | 5.6473           | 1.8762           | -1.0494          |
| H           | 4.3102           | 2.2718           | 0.8308           | H           | 5.5221           | 0.9922           | 0.4611           |
| H           | 5.5935           | 1.2241           | -0.949           | H           | 5.9705           | -0.5599          | -1.3592          |
| H           | 4.2519           | 1.3228           | -2.0654          | H           | 4.6306           | 0.0557           | -2.2986          |
| H           | 4.1035           | 0.1025           | 1.6388           | H           | 4.6033           | -0.823           | 1.507            |
| H           | 4.559            | -1.532           | 1.1712           | H           | 4.2478           | -2.5122          | 1.1658           |
| H           | 5.6642           | -0.2184          | 0.891            | H           | 5.7371           | -1.8158          | 0.5979           |
| H           | -6.4523          | 1.5166           | 0.4932           | H           | -6.554           | 1.1704           | -1.7613          |
| H           | -7.5402          | 0.721            | -0.6324          | H           | -7.5204          | 1.9324           | -0.5076          |
| H           | -5.7723          | 2.2298           | -1.6713          | H           | -7.4204          | -0.6041          | -0.4274          |
| H           | -5.9046          | 0.6131           | -2.3605          | H           | -7.0558          | 0.2189           | 1.088            |
| H           | -6.7546          | -0.8964          | 1.0563           | H           | -5.3743          | 3.1225           | -0.7396          |
| H           | -6.2163          | -1.3425          | -0.5539          | H           | -5.523           | 2.3828           | 0.8448           |
| H           | -1.5724          | 0.2264           | -0.8379          | H           | -2.9261          | -1.8134          | 0.4802           |
| H           | -1.8623          | 0.3763           | 0.8833           | H           | -2.4311          | -0.9576          | -0.9638          |
| H           | -2.0896          | -2.1602          | -0.8284          | H           | -2.1973          | -0.0233          | 1.9461           |
| H           | -2.5093          | -3.3907          | 1.2541           | H           | -0.9608          | 1.9336           | 1.1227           |
| H           | -2.4768          | -1.9071          | 2.1969           | H           | -1.1626          | 1.4292           | -0.5459          |
| H           | -4.432           | -2.6568          | -0.0171          | H           | -3.3355          | 2.2124           | 1.4403           |
| H           | -4.7919          | -2.5703          | 1.6995           | H           | -2.8273          | 3.1349           | 0.035            |
| H           | -5.2104          | -0.3662          | 2.8298           | H           | -3.6319          | 2.5285           | -2.2753          |
| H           | -3.527           | 0.0703           | 2.5423           | H           | -2.7147          | 1.0283           | -2.1669          |
| H           | -4.8076          | 1.1568           | 2.027            | H           | -4.4228          | 0.9762           | -2.5785          |
| H           | -3.6248          | 1.7472           | -3.1797          | H           | -6.3257          | -2.3381          | 1.2352           |
| H           | 1.1314           | -0.0817          | -2.076           | H           | 1.2703           | 0.1491           | -1.7564          |
| H           | 0.4703           | 5.0455           | 0.8186           | H           | 4.5421           | 4.4552           | 1.9034           |
| H           | 0.6522           | 4.2712           | -0.8455          | H           | 5.519            | 2.9479           | 1.5234           |
| H           | -0.0768          | -2.3948          | 2.4348           | H           | -0.181           | -1.2772          | 3.05             |
| H           | 1.5584           | 4.243            | 2.7056           | H           | 2.4887           | 4.9207           | 0.985            |
| <b>1b-1</b> | <b>X axis(Å)</b> | <b>Y axis(Å)</b> | <b>Z axis(Å)</b> | <b>1b-2</b> | <b>X axis(Å)</b> | <b>Y axis(Å)</b> | <b>Z axis(Å)</b> |
| C           | -3.0422          | -2.9659          | -1.4355          | C           | -3.0111          | -3.0569          | -1.2765          |
| C           | -2.8087          | -2.9308          | 0.0756           | C           | -2.7279          | -2.9622          | 0.2236           |
| C           | -2.1089          | -1.6462          | 0.5395           | C           | -2.0468          | -1.6449          | 0.6177           |
| C           | -2.8469          | -0.3724          | 0.0253           | C           | -2.8355          | -0.4092          | 0.0854           |



|   |         |         |         |   |         |         |         |
|---|---------|---------|---------|---|---------|---------|---------|
| C | -2.9733 | -0.3915 | -1.5434 | C | -3.013  | -0.4869 | -1.4765 |
| C | -3.7077 | -1.6925 | -1.9695 | C | -3.7268 | -1.8202 | -1.8318 |
| C | -2.2071 | 0.9515  | 0.5013  | C | -2.2167 | 0.9468  | 0.494   |
| C | -2.9628 | 2.1961  | -0.015  | C | -3.0222 | 2.1525  | -0.0388 |
| C | -3.2084 | 2.1647  | -1.5322 | C | -3.3139 | 2.0618  | -1.5452 |
| C | -3.8126 | 0.8352  | -1.9962 | C | -3.8982 | 0.7021  | -1.9429 |
| C | -1.6172 | -0.3289 | -2.2967 | C | -1.6849 | -0.4172 | -2.2774 |
| O | -0.7237 | -1.6707 | 0.1304  | O | -0.6762 | -1.6496 | 0.1613  |
| C | -2.31   | 3.4943  | 0.4222  | C | -2.3924 | 3.4819  | 0.3339  |
| C | 6.0877  | 0.2148  | -0.9502 | C | 6.1633  | -0.1188 | 0.0048  |
| C | 5.475   | 1.3283  | -0.1101 | C | 5.5189  | 1.263   | -0.0136 |
| C | 3.9964  | 1.158   | 0.1441  | C | 4.0138  | 1.1986  | 0.0548  |
| C | 3.328   | -0.007  | -0.0404 | C | 3.3087  | 0.0789  | -0.2341 |
| C | 4.0456  | -1.2708 | -0.5567 | C | 3.9817  | -1.182  | -0.8144 |
| C | 5.5919  | -1.141  | -0.4731 | C | 5.51    | -1.0064 | -1.0414 |
| C | 1.8394  | -0.1979 | 0.2139  | C | 1.8273  | -0.1062 | 0.0524  |
| C | 1.5344  | -1.4329 | 1.0859  | C | 1.6024  | -1.288  | 1.0232  |
| C | 2.1505  | -2.6955 | 0.4784  | C | 2.263   | -2.5766 | 0.5145  |
| C | 3.6554  | -2.515  | 0.2867  | C | 3.7411  | -2.3554 | 0.1713  |
| C | 3.6474  | -1.4994 | -2.0346 | C | 3.3826  | -1.5294 | -2.1998 |
| C | 3.3289  | 2.4231  | 0.5862  | C | 3.3686  | 2.4726  | 0.5011  |
| O | 3.9616  | 3.3983  | 0.9792  | O | 4.0065  | 3.4105  | 0.9682  |
| C | 0.0493  | -1.5906 | 1.2831  | C | 0.1326  | -1.4929 | 1.281   |
| C | -1.9831 | -1.6392 | 2.047   | C | -1.8693 | -1.5787 | 2.1186  |
| O | -4.1991 | -0.3842 | 0.5529  | O | -4.1688 | -0.4373 | 0.6586  |
| C | -2.9411 | 4.4119  | 1.1738  | C | -3.0276 | 4.409   | 1.0704  |
| O | -2.9089 | -1.5977 | 2.8456  | O | -2.7678 | -1.5395 | 2.9478  |
| C | -0.5863 | -1.6078 | 2.4522  | C | -0.4614 | -1.4821 | 2.4719  |
| C | -0.9082 | 3.81    | 0.0254  | C | -1.0105 | 3.8199  | -0.1115 |
| O | -0.1926 | 3.0369  | -0.6002 | O | -0.2907 | 3.0455  | -0.7306 |
| H | -2.0888 | -3.1353 | -1.948  | H | -2.0712 | -3.221  | -1.8152 |
| H | -3.672  | -3.8294 | -1.6812 | H | -3.6262 | -3.9439 | -1.4701 |
| H | -3.7753 | -3.0377 | 0.5844  | H | -3.6736 | -3.075  | 0.769   |
| H | -2.2125 | -3.8093 | 0.3537  | H | -2.0998 | -3.815  | 0.5114  |
| H | -4.7464 | -1.6698 | -1.6149 | H | -4.7535 | -1.8108 | -1.4433 |
| H | -3.7648 | -1.7524 | -3.0638 | H | -3.8183 | -1.9206 | -2.9209 |
| H | -2.2216 | 0.997   | 1.5983  | H | -2.1962 | 1.0305  | 1.5885  |
| H | -1.1556 | 0.9785  | 0.2061  | H | -1.177  | 0.9907  | 0.162   |
| H | -3.9594 | 2.1628  | 0.4503  | H | -4.0024 | 2.1086  | 0.4593  |
| H | -3.8927 | 2.9769  | -1.8098 | H | -4.0272 | 2.8466  | -1.8286 |
| H | -2.2809 | 2.3565  | -2.0831 | H | -2.409  | 2.2569  | -2.1314 |
| H | -3.9062 | 0.849   | -3.0897 | H | -4.0275 | 0.6751  | -3.0325 |
| H | -4.8376 | 0.7595  | -1.6109 | H | -4.9077 | 0.6145  | -1.5212 |
| H | -1.0234 | -1.2392 | -2.1948 | H | -1.0647 | -1.3085 | -2.165  |
| H | -1.7834 | -0.1963 | -3.3728 | H | -1.8902 | -0.3265 | -3.3511 |
| H | -0.9885 | 0.5014  | -1.9653 | H | -1.0673 | 0.4395  | -1.9962 |
| H | 5.8413  | 0.3631  | -2.0078 | H | 7.2359  | -0.0263 | -0.2006 |

|             |                  |                  |                  |             |                  |                  |                  |
|-------------|------------------|------------------|------------------|-------------|------------------|------------------|------------------|
| H           | 7.1805           | 0.2599           | -0.8766          | H           | 6.0678           | -0.5688          | 1.0003           |
| H           | 5.6693           | 2.2791           | -0.6214          | H           | 5.8092           | 1.7993           | -0.9255          |
| H           | 5.9884           | 1.3744           | 0.8589           | H           | 5.9233           | 1.8261           | 0.8358           |
| H           | 6.0743           | -1.9344          | -1.0578          | H           | 5.6963           | -0.5554          | -2.0262          |
| H           | 5.927            | -1.2798          | 0.5641           | H           | 6.0095           | -1.9832          | -1.0592          |
| H           | 1.3901           | 0.665            | 0.7113           | H           | 1.3727           | 0.7786           | 0.5043           |
| H           | 1.3357           | -0.2788          | -0.7577          | H           | 1.2933           | -0.2577          | -0.8926          |
| H           | 1.9991           | -1.2707          | 2.0696           | H           | 2.0857           | -1.0266          | 1.9764           |
| H           | 1.9756           | -3.5534          | 1.1399           | H           | 2.1905           | -3.3583          | 1.2815           |
| H           | 1.6754           | -2.9424          | -0.4786          | H           | 1.7313           | -2.9639          | -0.3631          |
| H           | 4.1121           | -2.441           | 1.2835           | H           | 4.2869           | -2.1727          | 1.1064           |
| H           | 4.0676           | -3.4234          | -0.1711          | H           | 4.1469           | -3.2868          | -0.2441          |
| H           | 4.1693           | -2.3685          | -2.4516          | H           | 3.8856           | -2.4023          | -2.6326          |
| H           | 2.5746           | -1.6806          | -2.1558          | H           | 2.3147           | -1.7626          | -2.1641          |
| H           | 3.8939           | -0.6342          | -2.6598          | H           | 3.5044           | -0.6945          | -2.9004          |
| H           | 2.2325           | 2.451            | 0.5425           | H           | 2.28             | 2.5479           | 0.3746           |
| H           | -4.1581          | -0.537           | 1.5199           | H           | -4.092           | -0.5557          | 1.6282           |
| H           | -2.4731          | 5.3407           | 1.4867           | H           | -2.5767          | 5.3601           | 1.3378           |
| H           | -3.9653          | 4.256            | 1.5024           | H           | -4.0381          | 4.2383           | 1.4325           |
| H           | -0.2166          | -1.5382          | 3.457            | H           | -0.06            | -1.3558          | 3.4589           |
| H           | -0.5319          | 4.7978           | 0.3423           | H           | -0.6529          | 4.8274           | 0.1618           |
| <b>1b-3</b> | <b>X axis(Å)</b> | <b>Y axis(Å)</b> | <b>Z axis(Å)</b> | <b>1b-4</b> | <b>X axis(Å)</b> | <b>Y axis(Å)</b> | <b>Z axis(Å)</b> |
| C           | -1.6326          | -3.4687          | 0.2686           | C           | -2.6369          | -3.2335          | -1.6522          |
| C           | -1.4387          | -2.6017          | 1.5127           | C           | -2.0249          | -3.2024          | -0.2513          |
| C           | -1.5227          | -1.0976          | 1.2076           | C           | -1.7294          | -1.7761          | 0.2362           |
| C           | -2.8319          | -0.7425          | 0.4429           | C           | -2.9851          | -0.861           | 0.1223           |
| C           | -2.9608          | -1.5831          | -0.8811          | C           | -3.5354          | -0.8365          | -1.3518          |
| C           | -2.8865          | -3.0942          | -0.528           | C           | -3.8376          | -2.2932          | -1.7996          |
| C           | -2.9939          | 0.7653           | 0.1449           | C           | -2.7598          | 0.578            | 0.6398           |
| C           | -4.3256          | 1.0756           | -0.5773          | C           | -4.0389          | 1.4407           | 0.5415           |
| C           | -4.5515          | 0.2013           | -1.8222          | C           | -4.678           | 1.4101           | -0.8568          |
| C           | -4.3402          | -1.2884          | -1.5339          | C           | -4.8557          | -0.0172          | -1.3843          |
| C           | -1.8676          | -1.2759          | -1.939           | C           | -2.566           | -0.2004          | -2.3833          |
| O           | -0.3343          | -0.6825          | 0.4985           | O           | -0.5927          | -1.246           | -0.4796          |
| C           | -4.4892          | 2.5524           | -0.8809          | C           | -3.8209          | 2.8576           | 1.0364           |
| C           | 6.716            | 0.6887           | -0.8068          | C           | 6.4887           | 1.6644           | -0.6367          |
| C           | 5.8866           | -0.1714          | -1.7514          | C           | 6.612            | 0.1573           | -0.4545          |
| C           | 4.5532           | -0.6031          | -1.1835          | C           | 5.3771           | -0.4965          | 0.1236           |
| C           | 3.9976           | -0.0597          | -0.0716          | C           | 4.167            | 0.112            | 0.1952           |
| C           | 4.683            | 1.1015           | 0.6788           | C           | 3.955            | 1.5378           | -0.3587          |
| C           | 5.8373           | 1.7366           | -0.1451          | C           | 5.1404           | 2.0086           | -1.2463          |
| C           | 2.686            | -0.5081          | 0.5621           | C           | 2.913            | -0.4949          | 0.8134           |
| C           | 1.6993           | 0.6569           | 0.7745           | C           | 1.6994           | -0.4548          | -0.137           |
| C           | 2.3611           | 1.764            | 1.6087           | C           | 1.4398           | 0.9841           | -0.607           |
| C           | 3.6613           | 2.2361           | 0.9595           | C           | 2.6865           | 1.5865           | -1.2506          |
| C           | 5.2638           | 0.574            | 2.0122           | C           | 3.8039           | 2.525            | 0.8231           |
| C           | 3.9185           | -1.7057          | -1.9748          | C           | 5.6393           | -1.8826          | 0.6262           |

|   |         |         |         |   |         |         |         |
|---|---------|---------|---------|---|---------|---------|---------|
| O | 4.4401  | -2.1847 | -2.9767 | O | 6.7277  | -2.4355 | 0.5069  |
| C | 0.3969  | 0.1458  | 1.3492  | C | 0.4304  | -1.0375 | 0.4439  |
| C | -1.3987 | -0.3127 | 2.4928  | C | -1.2037 | -1.8192 | 1.652   |
| O | -3.9574 | -1.117  | 1.2818  | O | -4.0358 | -1.4317 | 0.9472  |
| C | -5.4751 | 3.3018  | -0.3598 | C | -4.4765 | 3.3733  | 2.0898  |
| O | -2.2345 | -0.2529 | 3.3843  | O | -1.839  | -2.1397 | 2.6473  |
| C | -0.1425 | 0.418   | 2.5361  | C | 0.1785  | -1.3705 | 1.7085  |
| C | -3.5377 | 3.2442  | -1.7945 | C | -2.8469 | 3.7543  | 0.3537  |
| O | -2.5736 | 2.6912  | -2.3082 | O | -2.1522 | 3.4019  | -0.5911 |
| H | -0.7449 | -3.3967 | -0.3695 | H | -1.8689 | -2.9828 | -2.3922 |
| H | -1.7009 | -4.5205 | 0.5711  | H | -2.9533 | -4.2578 | -1.8829 |
| H | -2.1957 | -2.8776 | 2.258   | H | -2.7094 | -3.7042 | 0.4447  |
| H | -0.4645 | -2.8471 | 1.955   | H | -1.1034 | -3.7986 | -0.264  |
| H | -3.7681 | -3.3859 | 0.0576  | H | -4.6703 | -2.7008 | -1.2118 |
| H | -2.9206 | -3.698  | -1.4438 | H | -4.1731 | -2.3047 | -2.8445 |
| H | -2.9958 | 1.3307  | 1.0861  | H | -2.4687 | 0.5495  | 1.6981  |
| H | -2.1361 | 1.128   | -0.4289 | H | -1.9264 | 1.0416  | 0.1046  |
| H | -5.1265 | 0.8036  | 0.1265  | H | -4.7744 | 0.976   | 1.2153  |
| H | -5.5753 | 0.346   | -2.1909 | H | -5.6615 | 1.8965  | -0.8212 |
| H | -3.8942 | 0.5073  | -2.6431 | H | -4.0857 | 1.9899  | -1.5729 |
| H | -4.445  | -1.8508 | -2.4707 | H | -5.2497 | 0.0279  | -2.4078 |
| H | -5.152  | -1.6396 | -0.8841 | H | -5.6301 | -0.5185 | -0.7896 |
| H | -0.8723 | -1.6101 | -1.64   | H | -1.674  | -0.8029 | -2.5654 |
| H | -2.0909 | -1.7926 | -2.8805 | H | -3.061  | -0.0906 | -3.356  |
| H | -1.791  | -0.2103 | -2.1697 | H | -2.2243 | 0.7938  | -2.0844 |
| H | 7.1994  | 0.0589  | -0.0513 | H | 6.6165  | 2.1717  | 0.3263  |
| H | 7.5221  | 1.1758  | -1.3676 | H | 7.2957  | 2.022   | -1.2867 |
| H | 6.4908  | -1.0466 | -2.0202 | H | 7.4814  | -0.0293 | 0.1879  |
| H | 5.701   | 0.3876  | -2.6777 | H | 6.8249  | -0.3073 | -1.4259 |
| H | 6.4529  | 2.3829  | 0.4931  | H | 5.0817  | 3.0902  | -1.4217 |
| H | 5.4293  | 2.3857  | -0.9322 | H | 5.0839  | 1.5363  | -2.2367 |
| H | 2.1858  | -1.2805 | -0.0243 | H | 3.06    | -1.5315 | 1.1217  |
| H | 2.9099  | -0.9854 | 1.5252  | H | 2.6898  | 0.0554  | 1.7364  |
| H | 1.4612  | 1.0868  | -0.2097 | H | 1.9543  | -1.0633 | -1.0172 |
| H | 1.6819  | 2.6212  | 1.6997  | H | 0.6254  | 1.003   | -1.3426 |
| H | 2.5635  | 1.4159  | 2.6286  | H | 1.1082  | 1.6082  | 0.2321  |
| H | 3.3997  | 2.7372  | 0.0171  | H | 2.8737  | 1.0401  | -2.1856 |
| H | 4.1189  | 3.0038  | 1.5968  | H | 2.4713  | 2.623   | -1.5409 |
| H | 5.7982  | 1.3671  | 2.548   | H | 3.7012  | 3.5552  | 0.4628  |
| H | 4.4899  | 0.1982  | 2.6886  | H | 2.9234  | 2.3132  | 1.4376  |
| H | 5.9685  | -0.2487 | 1.8495  | H | 4.6717  | 2.4927  | 1.4909  |
| H | 2.9478  | -2.0803 | -1.6286 | H | 4.809   | -2.4053 | 1.1157  |
| H | -3.8339 | -0.7139 | 2.1668  | H | -3.6741 | -1.5999 | 1.8424  |
| H | -5.591  | 4.3589  | -0.5797 | H | -4.3201 | 4.3884  | 2.4422  |
| H | -6.2094 | 2.8678  | 0.3137  | H | -5.2045 | 2.7812  | 2.6383  |
| H | 0.1961  | 1.0321  | 3.3481  | H | 0.7771  | -1.3062 | 2.5964  |
| H | -3.747  | 4.3104  | -1.9857 | H | -2.7753 | 4.7787  | 0.7573  |

| 1b-5 | X axis(Å) | Y axis(Å) | Z axis(Å) | 1b-6 | X axis(Å) | Y axis(Å) | Z axis(Å) |
|------|-----------|-----------|-----------|------|-----------|-----------|-----------|
| C    | -2.5495   | -3.424    | -1.0085   | C    | -3.0448   | -2.9845   | -1.4003   |
| C    | -2.338    | -3.0643   | 0.462     | C    | -2.7845   | -2.9353   | 0.1058    |
| C    | -1.8401   | -1.6241   | 0.6617    | C    | -2.0565   | -1.6572   | 0.5435    |
| C    | -2.7451   | -0.5948   | -0.0769   | C    | -2.7779   | -0.3758   | 0.0218    |
| C    | -2.8659   | -0.9396   | -1.6068   | C    | -2.9391   | -0.414    | -1.5429   |
| C    | -3.3973   | -2.3912   | -1.7576   | C    | -3.7031   | -1.7082   | -1.9356   |
| C    | -2.3037   | 0.8759    | 0.1078    | C    | -2.0995   | 0.9413    | 0.4596    |
| C    | -3.2686   | 1.8722    | -0.5801   | C    | -2.8434   | 2.1935    | -0.0524   |
| C    | -3.49     | 1.5073    | -2.0625   | C    | -3.137    | 2.1481    | -1.5609   |
| C    | -3.8826   | 0.0391    | -2.258    | C    | -3.7698   | 0.8206    | -1.9933   |
| C    | -1.5327   | -0.8272   | -2.3945   | C    | -1.5988   | -0.3841   | -2.3253   |
| O    | -0.458    | -1.5248   | 0.2469    | O    | -0.6767   | -1.7115   | 0.1209    |
| C    | -2.8093   | 3.3048    | -0.3501   | C    | -2.1389   | 3.4717    | 0.362     |
| C    | 6.3182    | 0.3937    | -1.0123   | C    | 6.0199    | 0.4654    | -1.0393   |
| C    | 5.7087    | 1.575     | -0.2686   | C    | 5.3882    | 1.523     | -0.1393   |
| C    | 4.2342    | 1.4215    | 0.0276    | C    | 3.9451    | 1.2512    | 0.1822    |
| C    | 3.5666    | 0.2445    | -0.0635   | C    | 3.3158    | 0.0801    | -0.0624   |
| C    | 4.2925    | -1.0591   | -0.4622   | C    | 4.0589    | -1.1309   | -0.6458   |
| C    | 5.8383    | -0.9133   | -0.404    | C    | 5.6006    | -0.9326   | -0.5998   |
| C    | 2.0751    | 0.0615    | 0.188     | C    | 1.8356    | -0.15     | 0.1833    |
| C    | 1.7771    | -1.0733   | 1.1856    | C    | 1.5844    | -1.3954   | 1.0513    |
| C    | 2.4166    | -2.3874   | 0.725     | C    | 2.234     | -2.6328   | 0.4188    |
| C    | 3.9184    | -2.2109   | 0.51      | C    | 3.7298    | -2.4043   | 0.1816    |
| C    | 3.8878    | -1.4407   | -1.9063   | C    | 3.6305    | -1.3368   | -2.1175   |
| C    | 3.5818    | 2.7144    | 0.4083    | C    | 3.2376    | 2.4163    | 0.7866    |
| O    | 4.2118    | 3.7566    | 0.5543    | O    | 2.6258    | 2.3555    | 1.8464    |
| C    | 0.293     | -1.2392   | 1.3825    | C    | 0.1067    | -1.5914   | 1.2644    |
| C    | -1.7412   | -1.3286   | 2.1427    | C    | -1.9159   | -1.6333   | 2.05      |
| O    | -4.0825   | -0.701    | 0.4721    | O    | -4.1196   | -0.3509   | 0.5767    |
| C    | -2.2237   | 4.1226    | -1.2407   | C    | -2.703    | 4.3875    | 1.1673    |
| O    | -2.674    | -1.2452   | 2.9284    | O    | -2.8348   | -1.5873   | 2.8566    |
| C    | -0.3576   | -1.116    | 2.5368    | C    | -0.516    | -1.5875   | 2.4406    |
| C    | -3.0689   | 3.8902    | 0.9998    | C    | -0.7522   | 3.7601    | -0.1051   |
| O    | -3.5662   | 3.2505    | 1.9181    | O    | -0.1282   | 3.0354    | -0.8708   |
| H    | -1.5774   | -3.5426   | -1.4995   | H    | -2.1031   | -3.1726   | -1.9277   |
| H    | -3.039    | -4.4033   | -1.0717   | H    | -3.6906   | -3.8419   | -1.6247   |
| H    | -3.2834   | -3.2125   | 0.9998    | H    | -3.7442   | -3.0205   | 0.6316    |
| H    | -1.622    | -3.7768   | 0.8914    | H    | -2.1978   | -3.82     | 0.3845    |
| H    | -4.4285   | -2.4541   | -1.3862   | H    | -4.733    | -1.6649   | -1.5583   |
| H    | -3.4423   | -2.6685   | -2.8185   | H    | -3.7855   | -1.7811   | -3.0276   |
| H    | -2.2807   | 1.1097    | 1.179     | H    | -2.0812   | 1.0011    | 1.5558    |
| H    | -1.2819   | 1.0268    | -0.2594   | H    | -1.0569   | 0.9495    | 0.1326    |
| H    | -4.254    | 1.7773    | -0.1017   | H    | -3.8262   | 2.1898    | 0.4424    |
| H    | -4.2802   | 2.1426    | -2.4825   | H    | -3.8199   | 2.966     | -1.8251   |
| H    | -2.5895   | 1.71      | -2.6524   | H    | -2.2275   | 2.3219    | -2.1456   |
| H    | -3.9707   | -0.1659   | -3.3327   | H    | -3.8873   | 0.8213    | -3.0846   |

|             |                  |                  |                  |             |                  |                  |                  |
|-------------|------------------|------------------|------------------|-------------|------------------|------------------|------------------|
| H           | -4.8861          | -0.1169          | -1.8418          | H           | -4.787           | 0.7653           | -1.5849          |
| H           | -0.8047          | -1.5938          | -2.122           | H           | -1.01            | -1.2959          | -2.2088          |
| H           | -1.7132          | -0.9485          | -3.4696          | H           | -1.7867          | -0.2802          | -3.401           |
| H           | -1.0407          | 0.1395           | -2.2603          | H           | -0.9567          | 0.4498           | -2.0314          |
| H           | 6.0559           | 0.4425           | -2.0752          | H           | 5.7304           | 0.6402           | -2.0819          |
| H           | 7.4116           | 0.4521           | -0.9588          | H           | 7.1116           | 0.5571           | -1.0003          |
| H           | 5.8879           | 2.4746           | -0.8703          | H           | 5.4948           | 2.5006           | -0.6246          |
| H           | 6.2381           | 1.7144           | 0.6828           | H           | 5.9471           | 1.5729           | 0.804            |
| H           | 6.3218           | -1.7555          | -0.9149          | H           | 6.1009           | -1.6804          | -1.2277          |
| H           | 6.1835           | -0.9508          | 0.6385           | H           | 5.9723           | -1.0939          | 0.4215           |
| H           | 1.5977           | 0.9672           | 0.5674           | H           | 1.3499           | 0.7112           | 0.6503           |
| H           | 1.5886           | -0.1391          | -0.7755          | H           | 1.342            | -0.258           | -0.7913          |
| H           | 2.228            | -0.7989          | 2.1505           | H           | 2.0588           | -1.2277          | 2.0292           |
| H           | 2.2536           | -3.1674          | 1.4796           | H           | 1.7422           | -2.8905          | -0.527           |
| H           | 1.947            | -2.7496          | -0.1975          | H           | 2.1058           | -3.5001          | 1.0788           |
| H           | 4.3759           | -2.0259          | 1.4919           | H           | 4.2152           | -2.3379          | 1.1653           |
| H           | 4.3403           | -3.1581          | 0.1501           | H           | 4.153            | -3.2904          | -0.3087          |
| H           | 4.4212           | -2.3388          | -2.2386          | H           | 4.1861           | -2.1637          | -2.5748          |
| H           | 2.8179           | -1.6514          | -2.0008          | H           | 2.5666           | -1.5743          | -2.2158          |
| H           | 4.116            | -0.6383          | -2.6163          | H           | 3.8126           | -0.4412          | -2.7215          |
| H           | 2.4953           | 2.7047           | 0.5559           | H           | 3.3498           | 3.3628           | 0.2316           |
| H           | -4.0406          | -0.5327          | 1.4375           | H           | -4.0612          | -0.4893          | 1.545            |
| H           | -1.9398          | 5.143            | -0.9977          | H           | -2.1952          | 5.2985           | 1.4696           |
| H           | -2.0007          | 3.8059           | -2.254           | H           | -3.7085          | 4.2463           | 1.5548           |
| H           | -0.0077          | -0.8914          | 3.526            | H           | -0.1348          | -1.4762          | 3.4373           |
| H           | -2.7767          | 4.9456           | 1.1327           | H           | -0.303           | 4.6908           | 0.2817           |
| <b>1b-7</b> | <b>X axis(Å)</b> | <b>Y axis(Å)</b> | <b>Z axis(Å)</b> | <b>1b-8</b> | <b>X axis(Å)</b> | <b>Y axis(Å)</b> | <b>Z axis(Å)</b> |
| C           | -2.254           | -3.4913          | -1.1462          | C           | -1.4895          | 3.1862           | -1.5248          |
| C           | -2.0014          | -3.2554          | 0.3431           | C           | -1.3575          | 1.8758           | -2.3004          |
| C           | -1.6201          | -1.8008          | 0.6603           | C           | -1.4619          | 0.6329           | -1.4009          |
| C           | -2.6529          | -0.7966          | 0.0701           | C           | -2.741           | 0.6711           | -0.5152          |
| C           | -2.8181          | -1.0005          | -1.4813          | C           | -2.8016          | 1.99             | 0.3397           |
| C           | -3.2254          | -2.4745          | -1.7543          | C           | -2.7189          | 3.2148           | -0.6119          |
| C           | -2.3356          | 0.6846           | 0.3813           | C           | -2.9133          | -0.5672          | 0.3946           |
| C           | -3.4221          | 1.6473           | -0.1625          | C           | -4.2341          | -0.5249          | 1.2016           |
| C           | -3.6891          | 1.4112           | -1.6601          | C           | -4.3745          | 0.7991           | 1.9804           |
| C           | -3.9464          | -0.0625          | -1.9912          | C           | -4.1591          | 2.0312           | 1.0954           |
| C           | -1.5426          | -0.6882          | -2.3094          | C           | -1.6703          | 2.1192           | 1.3947           |
| O           | -0.2755          | -1.5386          | 0.1973           | O           | -0.2552          | 0.5001           | -0.6143          |
| C           | -3.1359          | 3.1187           | 0.0966           | C           | -4.3767          | -1.7735          | 2.0595           |
| C           | 6.3492           | 0.83             | -1.1185          | C           | 6.7975           | -0.4904          | 0.9722           |
| C           | 5.7311           | 1.8827           | -0.2078          | C           | 6.0206           | 0.704            | 1.5102           |
| C           | 4.2791           | 1.6289           | 0.1279           | C           | 4.6841           | 0.9225           | 0.8377           |
| C           | 3.6546           | 0.4428           | -0.0781          | C           | 4.0757           | -0.0027          | 0.0543           |
| C           | 4.4118           | -0.7694          | -0.6636          | C           | 4.7049           | -1.3929          | -0.1769          |
| C           | 5.9518           | -0.5617          | -0.656           | C           | 5.8724           | -1.6841          | 0.8064           |
| C           | 2.1856           | 0.1636           | 0.2145           | C           | 2.751            | 0.1992           | -0.6723          |

|   |         |         |         |   |         |         |         |
|---|---------|---------|---------|---|---------|---------|---------|
| C | 1.9835  | -1.0939 | 1.0802  | C | 1.7312  | -0.917  | -0.371  |
| C | 2.651   | -2.3134 | 0.4356  | C | 2.3359  | -2.2889 | -0.7051 |
| C | 4.1321  | -2.0448 | 0.1771  | C | 3.6472  | -2.5066 | 0.048   |
| C | 3.9524  | -0.9937 | -2.1241 | C | 5.2501  | -1.4691 | -1.6228 |
| C | 3.5944  | 2.8359  | 0.6892  | C | 4.1126  | 2.2788  | 1.1167  |
| O | 4.192   | 3.8725  | 0.9582  | O | 4.6414  | 3.0721  | 1.8889  |
| C | 0.5193  | -1.3511 | 1.3233  | C | 0.4186  | -0.6342 | -1.0671 |
| C | -1.4671 | -1.6319 | 2.1562  | C | -1.405  | -0.6092 | -2.2607 |
| O | -3.9432 | -1.0817 | 0.6646  | O | -3.8919 | 0.7041  | -1.3968 |
| C | -1.9349 | 3.6862  | 0.2991  | C | -4.2174 | -1.8661 | 3.3903  |
| O | -2.3694 | -1.6492 | 2.9814  | O | -2.2599 | -0.9845 | -3.0498 |
| C | -0.0772 | -1.3952 | 2.5121  | C | -0.1751 | -1.3475 | -2.0222 |
| C | -4.3133 | 4.0364  | 0.1651  | C | -4.7767 | -3.0323 | 1.3617  |
| O | -5.467  | 3.6562  | 0.0107  | O | -4.9332 | -3.1016 | 0.149   |
| H | -1.3008 | -3.4718 | -1.6861 | H | -0.5795 | 3.3581  | -0.9394 |
| H | -2.6579 | -4.5012 | -1.2862 | H | -1.5511 | 4.0192  | -2.2354 |
| H | -2.9018 | -3.5385 | 0.9033  | H | -2.1353 | 1.8452  | -3.0744 |
| H | -1.2059 | -3.9376 | 0.6698  | H | -0.3952 | 1.8838  | -2.8283 |
| H | -4.2275 | -2.6681 | -1.3499 | H | -3.6171 | 3.2628  | -1.2413 |
| H | -3.2978 | -2.6524 | -2.8349 | H | -2.7095 | 4.1453  | -0.0299 |
| H | -2.2849 | 0.8323  | 1.4678  | H | -2.9242 | -1.4697 | -0.2285 |
| H | -1.3491 | 0.9421  | -0.0172 | H | -2.0593 | -0.6755 | 1.0733  |
| H | -4.3449 | 1.4013  | 0.3817  | H | -5.07   | -0.5377 | 0.4873  |
| H | -4.5618 | 1.9927  | -1.983  | H | -5.375  | 0.8572  | 2.428   |
| H | -2.8464 | 1.7831  | -2.2558 | H | -3.6645 | 0.8384  | 2.8137  |
| H | -4.0651 | -0.1677 | -3.0774 | H | -4.2183 | 2.9325  | 1.719   |
| H | -4.911  | -0.3561 | -1.5573 | H | -4.9919 | 2.1056  | 0.3845  |
| H | -0.7334 | -1.4015 | -2.1414 | H | -0.6829 | 2.2649  | 0.9523  |
| H | -1.7649 | -0.7298 | -3.3828 | H | -1.8462 | 2.9896  | 2.0386  |
| H | -1.1384 | 0.3068  | -2.1064 | H | -1.5994 | 1.2469  | 2.0494  |
| H | 6.0327  | 0.996   | -2.1545 | H | 7.2692  | -0.2333 | 0.0169  |
| H | 7.4407  | 0.9307  | -1.1065 | H | 7.6106  | -0.7401 | 1.6637  |
| H | 5.8468  | 2.8567  | -0.6989 | H | 6.6558  | 1.5913  | 1.3985  |
| H | 6.2989  | 1.9269  | 0.7306  | H | 5.8469  | 0.5666  | 2.5854  |
| H | 6.4425  | -1.3128 | -1.2878 | H | 6.4506  | -2.5531 | 0.4679  |
| H | 6.3492  | -0.71   | 0.3576  | H | 5.4772  | -1.9487 | 1.7969  |
| H | 1.6921  | 0.995   | 0.722   | H | 2.2894  | 1.1575  | -0.429  |
| H | 1.6602  | 0.0569  | -0.7435 | H | 2.9477  | 0.243   | -1.7516 |
| H | 2.4712  | -0.9158 | 2.0498  | H | 1.5221  | -0.9058 | 0.7089  |
| H | 2.5566  | -3.1845 | 1.0965  | H | 1.6343  | -3.0855 | -0.4268 |
| H | 2.151   | -2.5838 | -0.5023 | H | 2.5088  | -2.3869 | -1.7834 |
| H | 4.6299  | -1.9581 | 1.1529  | H | 3.4083  | -2.5763 | 1.1184  |
| H | 4.5727  | -2.9223 | -0.3136 | H | 4.0631  | -3.4819 | -0.2362 |
| H | 4.5039  | -1.8208 | -2.586  | H | 5.7432  | -2.4308 | -1.8057 |
| H | 2.8883  | -1.2394 | -2.1966 | H | 4.4619  | -1.3666 | -2.3752 |
| H | 4.1141  | -0.1028 | -2.7407 | H | 5.982   | -0.6786 | -1.8216 |
| H | 2.513   | 2.7669  | 0.857   | H | 3.1836  | 2.55    | 0.6012  |

|             |                  |                  |                  |              |                  |                  |                  |
|-------------|------------------|------------------|------------------|--------------|------------------|------------------|------------------|
| H           | -3.8552          | -1.063           | 1.6405           | H            | -3.869           | -0.0905          | -1.9716          |
| H           | -1.8184          | 4.7499           | 0.4896           | H            | -4.3543          | -2.7984          | 3.9313           |
| H           | -1.0153          | 3.1129           | 0.2721           | H            | -3.9395          | -1.0111          | 3.9975           |
| H           | 0.3126           | -1.2694          | 3.5039           | H            | 0.1134           | -2.2528          | -2.5207          |
| H           | -4.086           | 5.0972           | 0.3654           | H            | -4.9201          | -3.9164          | 2.0059           |
| <b>1b-9</b> | <b>X axis(Å)</b> | <b>Y axis(Å)</b> | <b>Z axis(Å)</b> | <b>1b-10</b> | <b>X axis(Å)</b> | <b>Y axis(Å)</b> | <b>Z axis(Å)</b> |
| C           | -2.5139          | -3.2829          | -1.6079          | C            | 1.7125           | -3.3215          | 1.0669           |
| C           | -1.9509          | -3.2189          | -0.1877          | C            | 1.499            | -3.004           | -0.4132          |
| C           | -1.6829          | -1.7808          | 0.2806           | C            | 1.5268           | -1.4957          | -0.7071          |
| C           | -2.9406          | -0.8782          | 0.1051           | C            | 2.8159           | -0.8281          | -0.1437          |
| C           | -3.4397          | -0.8876          | -1.3873          | C            | 2.9626           | -1.0928          | 1.4006           |
| C           | -3.7156          | -2.3552          | -1.8157          | C            | 2.9451           | -2.6256          | 1.653            |
| C           | -2.744           | 0.5725           | 0.601            | C            | 2.922            | 0.6837           | -0.4464          |
| C           | -4.0252          | 1.4228           | 0.4411           | C            | 4.2355           | 1.2945           | 0.0949           |
| C           | -4.6149          | 1.3594           | -0.9776          | C            | 4.4808           | 0.9721           | 1.5785           |
| C           | -4.7639          | -0.0795          | -1.482           | C            | 4.3248           | -0.5211          | 1.8836           |
| C           | -2.4397          | -0.2646          | -2.3974          | C            | 1.8499           | -0.4438          | 2.2661           |
| O           | -0.5264          | -1.2558          | -0.4062          | O            | 0.3183           | -0.8844          | -0.2041          |
| C           | -3.835           | 2.851            | 0.9147           | C            | 4.3445           | 2.7798           | -0.1909          |
| C           | 5.9809           | 1.2962           | -1.5698          | C            | -6.0129          | 1.8077           | 0.6598           |
| C           | 6.452            | 0.1544           | -0.6778          | C            | -5.67            | 0.7874           | 1.738            |
| C           | 5.3309           | -0.452           | 0.132            | C            | -4.4608          | -0.0454          | 1.3848           |
| C           | 4.1609           | 0.1896           | 0.37             | C            | -4.0097          | -0.1891          | 0.1145           |
| C           | 3.9302           | 1.6492           | -0.0783          | C            | -4.7674          | 0.4118           | -1.0885          |
| C           | 5.1775           | 2.2897           | -0.7494          | C            | -6.0937          | 1.1182           | -0.6905          |
| C           | 2.9257           | -0.4404          | 0.9971           | C            | -2.6955          | -0.8481          | -0.279           |
| C           | 1.745            | -0.4347          | -2.00E-04        | C            | -1.7584          | 0.1748           | -0.9591          |
| C           | 1.4803           | 0.9824           | -0.5431          | C            | -2.4569          | 0.8565           | -2.1511          |
| C           | 2.751            | 1.6473           | -1.084           | C            | -3.8228          | 1.4387           | -1.766           |
| C           | 3.5911           | 2.5557           | 1.131            | C            | -5.166           | -0.6902          | -2.1012          |
| C           | 5.6222           | -1.842           | 0.6031           | C            | -3.7879          | -0.6483          | 2.5785           |
| O           | 6.6653           | -2.4291          | 0.3359           | O            | -4.2194          | -0.5145          | 3.719            |
| C           | 0.4621           | -1.0188          | 0.5476           | C            | -0.4343          | -0.4704          | -1.3026          |
| C           | -1.2062          | -1.7911          | 1.7142           | C            | 1.3862           | -1.2667          | -2.194           |
| O           | -4.0152          | -1.4408          | 0.9047           | O            | 3.9613           | -1.4544          | -0.7814          |
| C           | -4.5312          | 3.3823           | 1.9337           | C            | 5.3085           | 3.3075           | -0.964           |
| O           | -1.8726          | -2.0975          | 2.6934           | O            | 2.2267           | -1.5228          | -3.0454          |
| C           | 0.1694           | -1.3283          | 1.8093           | C            | 0.1056           | -0.653           | -2.5063          |
| C           | -2.844           | 3.7417           | 0.2489           | C            | 3.361            | 3.734            | 0.3926           |
| O           | -2.1134          | 3.3761           | -0.6633          | O            | 2.4119           | 3.3855           | 1.0832           |
| H           | -1.7227          | -3.041           | -2.326           | H            | 0.817            | -3.0431          | 1.6335           |
| H           | -2.8147          | -4.3141          | -1.8285          | H            | 1.8207           | -4.4058          | 1.1895           |
| H           | -2.6553          | -3.7121          | 0.4943           | H            | 2.2721           | -3.5164          | -1.0003          |
| H           | -1.0252          | -3.8078          | -0.1566          | H            | 0.5382           | -3.435           | -0.7228          |
| H           | -4.5652          | -2.7576          | -1.2488          | H            | 3.8417           | -3.0871          | 1.2191           |
| H           | -4.0146          | -2.3904          | -2.8711          | H            | 2.9921           | -2.8313          | 2.73             |
| H           | -2.4896          | 0.5675           | 1.669            | H            | 2.9123           | 0.8456           | -1.5323          |

|              |                  |                  |                  |              |                  |                  |                  |
|--------------|------------------|------------------|------------------|--------------|------------------|------------------|------------------|
| H            | -1.8959          | 1.032            | 0.0855           | H            | 2.0469           | 1.2073           | -0.0506          |
| H            | -4.7802          | 0.9656           | 1.0982           | H            | 5.0517           | 0.8027           | -0.4553          |
| H            | -5.6024          | 1.8387           | -0.9861          | H            | 5.4955           | 1.2837           | 1.8585           |
| H            | -4.002           | 1.9295           | -1.6842          | H            | 3.8056           | 1.5451           | 2.223            |
| H            | -5.1225          | -0.058           | -2.5192          | H            | 4.4411           | -0.678           | 2.9637           |
| H            | -5.5548          | -0.5749          | -0.9043          | H            | 5.1544           | -1.0647          | 1.4133           |
| H            | -1.5378          | -0.8636          | -2.5367          | H            | 0.8697           | -0.9029          | 2.1234           |
| H            | -2.9016          | -0.1778          | -3.3885          | H            | 2.0831           | -0.5522          | 3.3324           |
| H            | -2.1155          | 0.738            | -2.1069          | H            | 1.7333           | 0.6253           | 2.0716           |
| H            | 6.8484           | 1.7953           | -2.0165          | H            | -6.9724          | 2.2825           | 0.895            |
| H            | 5.3772           | 0.9068           | -2.3982          | H            | -5.2606          | 2.6052           | 0.6381           |
| H            | 7.2306           | 0.5109           | 0.008            | H            | -6.5231          | 0.1188           | 1.908            |
| H            | 6.9136           | -0.5987          | -1.3277          | H            | -5.5022          | 1.3412           | 2.6695           |
| H            | 5.8448           | 2.7083           | 0.0171           | H            | -6.9117          | 0.3857           | -0.6436          |
| H            | 4.88             | 3.1346           | -1.3831          | H            | -6.3856          | 1.8458           | -1.4583          |
| H            | 3.0937           | -1.4717          | 1.3136           | H            | -2.1747          | -1.2831          | 0.5758           |
| H            | 2.6705           | 0.1026           | 1.9144           | H            | -2.891           | -1.6963          | -0.946           |
| H            | 2.0412           | -1.0673          | -0.8504          | H            | -1.5378          | 0.9658           | -0.2265          |
| H            | 0.7401           | 0.9421           | -1.3529          | H            | -1.8256          | 1.6675           | -2.5361          |
| H            | 1.0359           | 1.6108           | 0.2388           | H            | -2.5865          | 0.1489           | -2.9786          |
| H            | 3.0458           | 1.1226           | -2.0024          | H            | -3.6546          | 2.2906           | -1.0938          |
| H            | 2.5078           | 2.675            | -1.3829          | H            | -4.2953          | 1.8481           | -2.668           |
| H            | 3.4784           | 3.5995           | 0.814            | H            | -5.7429          | -0.2643          | -2.9309          |
| H            | 2.6623           | 2.2774           | 1.6361           | H            | -4.3093          | -1.2052          | -2.544           |
| H            | 4.3889           | 2.5209           | 1.8826           | H            | -5.7881          | -1.4558          | -1.6222          |
| H            | 4.863            | -2.3278          | 1.2281           | H            | -2.8846          | -1.2439          | 2.3989           |
| H            | -3.6833          | -1.5887          | 1.8149           | H            | 3.8315           | -1.4248          | -1.7526          |
| H            | -4.3947          | 4.4055           | 2.2709           | H            | 5.3852           | 4.3717           | -1.1662          |
| H            | -5.2739          | 2.7955           | 2.468            | H            | 6.0638           | 2.6754           | -1.4236          |
| H            | 0.7359           | -1.2401          | 2.7159           | H            | -0.2463          | -0.4078          | -3.4896          |
| H            | -2.7945          | 4.7746           | 0.6338           | H            | 3.5312           | 4.7991           | 0.1603           |
| <b>1b-11</b> | <b>X axis(Å)</b> | <b>Y axis(Å)</b> | <b>Z axis(Å)</b> | <b>1b-12</b> | <b>X axis(Å)</b> | <b>Y axis(Å)</b> | <b>Z axis(Å)</b> |
| C            | -2.4629          | -3.4812          | -1.2784          | C            | -2.4975          | -3.4996          | -0.7378          |
| C            | -1.898           | -3.1745          | 0.1083           | C            | -2.2382          | -3.0345          | 0.6949           |
| C            | -1.659           | -1.6739          | 0.3406           | C            | -1.7765          | -1.5708          | 0.7759           |
| C            | -2.9287          | -0.8329          | 0.0176           | C            | -2.742           | -0.6201          | 0.0094           |
| C            | -3.4311          | -1.1014          | -1.4483          | C            | -2.9139          | -1.0716          | -1.4875          |
| C            | -3.6834          | -2.6236          | -1.6261          | C            | -3.406           | -2.5445          | -1.5181          |
| C            | -2.7552          | 0.6853           | 0.2557           | C            | -2.3396          | 0.8717           | 0.0766           |
| C            | -4.0614          | 1.4751           | -0.0041          | C            | -3.3629          | 1.7906           | -0.6344          |
| C            | -4.6384          | 1.1623           | -1.4             | C            | -3.6317          | 1.32             | -2.0786          |
| C            | -4.7698          | -0.3415          | -1.6625          | C            | -3.986           | -0.1686          | -2.1591          |
| C            | -2.4449          | -0.6409          | -2.5551          | C            | -1.6178          | -0.9758          | -2.3369          |
| O            | -0.5086          | -1.2405          | -0.421           | O            | -0.4163          | -1.4625          | 0.2962           |
| C            | -3.8534          | 2.9577           | 0.2688           | C            | -2.9415          | 3.2484           | -0.5194          |
| C            | 6.5959           | 1.5925           | -0.8278          | C            | 6.4231           | 0.0743           | -0.0787          |
| C            | 6.6951           | 0.1317           | -0.4088          | C            | 5.8014           | 1.4615           | -0.1848          |



|   |         |         |         |   |         |         |         |
|---|---------|---------|---------|---|---------|---------|---------|
| C | 5.4375  | -0.4119 | 0.2313  | C | 4.2963  | 1.4339  | -0.0693 |
| C | 4.2335  | 0.2099  | 0.1718  | C | 3.5603  | 0.3141  | -0.271  |
| C | 4.0542  | 1.5322  | -0.6047 | C | 4.2024  | -1.003  | -0.7591 |
| C | 5.2686  | 1.8483  | -1.5213 | C | 5.7264  | -0.8751 | -1.0376 |
| C | 2.9562  | -0.2833 | 0.8414  | C | 2.0762  | 0.1747  | 0.0333  |
| C | 1.7701  | -0.3833 | -0.139  | C | 1.8439  | -0.9083 | 1.1086  |
| C | 1.5396  | 0.9655  | -0.8351 | C | 2.4968  | -2.2462 | 0.7258  |
| C | 2.8105  | 1.4505  | -1.5291 | C | 3.9699  | -2.0752 | 0.3374  |
| C | 3.8837  | 2.694   | 0.4028  | C | 3.5669  | -1.4663 | -2.0937 |
| C | 5.6701  | -1.702  | 0.9555  | C | 3.7035  | 2.7487  | 0.3284  |
| O | 6.7495  | -2.2843 | 0.9388  | O | 4.3854  | 3.737   | 0.5775  |
| C | 0.4795  | -0.8615 | 0.4873  | C | 0.3733  | -1.0884 | 1.3787  |
| C | -1.186  | -1.4575 | 1.7598  | C | -1.6255 | -1.1723 | 2.2281  |
| O | -3.9922 | -1.2738 | 0.8994  | O | -4.052  | -0.7265 | 0.6208  |
| C | -3.7428 | 3.9423  | -0.6386 | C | -2.419  | 4.0212  | -1.4862 |
| O | -1.8404 | -1.6336 | 2.7774  | O | -2.5277 | -1.0568 | 3.0449  |
| C | 0.1841  | -0.9702 | 1.7812  | C | -0.2327 | -0.9031 | 2.5488  |
| C | -3.8059 | 3.3827  | 1.7003  | C | -3.1661 | 3.9156  | 0.7984  |
| O | -3.8652 | 2.5914  | 2.6331  | O | -3.6067 | 3.3254  | 1.7767  |
| H | -1.6786 | -3.3453 | -2.0312 | H | -1.5427 | -3.6243 | -1.2603 |
| H | -2.7437 | -4.5402 | -1.3254 | H | -2.9589 | -4.4942 | -0.7144 |
| H | -2.5909 | -3.5657 | 0.8646  | H | -3.1562 | -3.1714 | 1.281   |
| H | -0.9602 | -3.732  | 0.2295  | H | -1.4842 | -3.696  | 1.1407  |
| H | -4.5222 | -2.9418 | -0.9934 | H | -4.419  | -2.6108 | -1.1002 |
| H | -3.9874 | -2.8379 | -2.6587 | H | -3.485  | -2.8947 | -2.5552 |
| H | -2.4589 | 0.8516  | 1.2983  | H | -1.3388 | 1.0264  | -0.3432 |
| H | -1.9426 | 1.0877  | -0.3602 | H | -2.2803 | 1.1784  | 1.1278  |
| H | -4.8181 | 1.1272  | 0.7138  | H | -4.3248 | 1.6993  | -0.1096 |
| H | -5.6285 | 1.6254  | -1.5    | H | -4.4575 | 1.9026  | -2.5066 |
| H | -4.0151 | 1.6015  | -2.1866 | H | -2.7621 | 1.5077  | -2.7179 |
| H | -5.132  | -0.4939 | -2.6874 | H | -4.1107 | -0.4486 | -3.213  |
| H | -5.5509 | -0.7477 | -1.0072 | H | -4.9666 | -0.3244 | -1.6914 |
| H | -1.5301 | -1.2354 | -2.5915 | H | -0.8563 | -1.7017 | -2.0453 |
| H | -2.9093 | -0.7365 | -3.5442 | H | -1.838  | -1.1746 | -3.393  |
| H | -2.1408 | 0.4031  | -2.4447 | H | -1.1507 | 0.0111  | -2.2884 |
| H | 6.7047  | 2.2434  | 0.0472  | H | 7.4909  | 0.1311  | -0.3189 |
| H | 7.4242  | 1.837   | -1.5029 | H | 6.3483  | -0.2977 | 0.95    |
| H | 7.5455  | 0.0403  | 0.2781  | H | 6.0741  | 1.9223  | -1.1424 |
| H | 6.926   | -0.4815 | -1.2894 | H | 6.2408  | 2.0785  | 0.608   |
| H | 5.2283  | 2.8895  | -1.8652 | H | 5.8935  | -0.5028 | -2.0581 |
| H | 5.2324  | 1.2272  | -2.4269 | H | 6.2077  | -1.8603 | -0.9946 |
| H | 3.0823  | -1.2605 | 1.311   | H | 1.6271  | 1.1031  | 0.3929  |
| H | 2.7147  | 0.4062  | 1.6604  | H | 1.5362  | -0.0607 | -0.8915 |
| H | 2.0437  | -1.1232 | -0.9056 | H | 2.3268  | -0.5621 | 2.0345  |
| H | 0.7453  | 0.8743  | -1.5872 | H | 2.4317  | -2.9441 | 1.5705  |
| H | 1.1931  | 1.7158  | -0.1137 | H | 1.9524  | -2.7211 | -0.0994 |
| H | 3.0162  | 0.7631  | -2.3615 | H | 4.5341  | -1.8113 | 1.2418  |

|              |                  |                  |                  |              |                  |                  |                  |
|--------------|------------------|------------------|------------------|--------------|------------------|------------------|------------------|
| H            | 2.6158           | 2.4304           | -1.9838          | H            | 4.3591           | -3.0461          | 0.0052           |
| H            | 3.8029           | 3.6555           | -0.1174          | H            | 4.0553           | -2.377           | -2.4606          |
| H            | 2.9846           | 2.5881           | 1.0178           | H            | 2.4997           | -1.6904          | -2.0125          |
| H            | 4.733            | 2.7604           | 1.0915           | H            | 3.675            | -0.6964          | -2.8671          |
| H            | 4.8266           | -2.124           | 1.5148           | H            | 2.609            | 2.8106           | 0.3719           |
| H            | -3.6976          | -1.1605          | 1.828            | H            | -3.9761          | -0.4908          | 1.5699           |
| H            | -3.6116          | 4.9835           | -0.3572          | H            | -2.1593          | 5.0638           | -1.3236          |
| H            | -3.7769          | 3.7483           | -1.7053          | H            | -2.2268          | 3.6433           | -2.4847          |
| H            | 0.7493           | -0.7475          | 2.6655           | H            | 0.1518           | -0.6077          | 3.5061           |
| H            | -3.7047          | 4.4667           | 1.8786           | H            | -2.9023          | 4.9857           | 0.849            |
| <b>1b-13</b> | <b>X axis(Å)</b> | <b>Y axis(Å)</b> | <b>Z axis(Å)</b> | <b>1b-14</b> | <b>X axis(Å)</b> | <b>Y axis(Å)</b> | <b>Z axis(Å)</b> |
| C            | 1.3458           | 3.2956           | 1.1189           | C            | -2.3385          | -3.4667          | -1.31            |
| C            | 1.1709           | 2.1267           | 2.0885           | C            | -2.0909          | -3.3177          | 0.1913           |
| C            | 1.3225           | 0.7573           | 1.4062           | C            | -1.6144          | -1.9109          | 0.5821           |
| C            | 2.6519           | 0.6636           | 0.6022           | C            | -2.5604          | -0.8062          | 0.0236           |
| C            | 2.7597           | 1.8254           | -0.4533          | C            | -2.7148          | -0.9293          | -1.5374          |
| C            | 2.6237           | 3.1874           | 0.281            | C            | -3.2253          | -2.3554          | -1.8811          |
| C            | 2.8744           | -0.7032          | -0.0854          | C            | -2.1341          | 0.631            | 0.4025           |
| C            | 4.2409           | -0.7804          | -0.8135          | C            | -3.125           | 1.7024           | -0.1169          |
| C            | 4.4317           | 0.3979           | -1.7855          | C            | -3.3966          | 1.547            | -1.6239          |
| C            | 4.155            | 1.7561           | -1.1325          | C            | -3.7622          | 0.1122           | -2.0183          |
| C            | 1.6905           | 1.7717           | -1.5774          | C            | -1.4066          | -0.6772          | -2.3347          |
| O            | 0.1607           | 0.4918           | 0.5868           | O            | -0.248           | -1.7208          | 0.1517           |
| C            | 4.4921           | -2.0993          | -1.5286          | C            | -2.7088          | 3.1313           | 0.1966           |
| C            | -6.8606          | -0.5965          | -1.0817          | C            | 6.225            | 1.1066           | -0.9802          |
| C            | -6.0314          | 0.469            | -1.7865          | C            | 5.5455           | 2.0629           | -0.0077          |
| C            | -4.713           | 0.7705           | -1.1102          | C            | 4.1128           | 1.7041           | 0.2898           |
| C            | -4.1587          | -0.0186          | -0.1562          | C            | 3.563            | 0.4954           | 0.0247           |
| C            | -4.836           | -1.3327          | 0.2867           | C            | 4.3781           | -0.6305          | -0.6375          |
| C            | -5.9766          | -1.7637          | -0.6766          | C            | 5.9044           | -0.3357          | -0.6148          |
| C            | -2.8546          | 0.2764           | 0.5756           | C            | 2.1159           | 0.1336           | 0.3241           |
| C            | -1.8581          | -0.8984          | 0.5133           | C            | 1.9758           | -1.2019          | 1.0792           |
| C            | -2.5143          | -2.1771          | 1.055            | C            | 2.6993           | -2.3337          | 0.3431           |
| C            | -3.8041          | -2.4923          | 0.2993           | C            | 4.166            | -1.9737          | 0.1109           |
| C            | -5.433           | -1.1441          | 1.7015           | C            | 3.9245           | -0.7752          | -2.1097          |
| C            | -4.0938          | 2.0451           | -1.5962          | C            | 3.3474           | 2.8488           | 0.8748           |
| O            | -4.5737          | 2.7049           | -2.5124          | O            | 2.1809           | 3.1085           | 0.6095           |
| C            | -0.5635          | -0.5289          | 1.2027           | C            | 0.5213           | -1.5283          | 1.2942           |
| C            | 1.2161           | -0.3365          | 2.4439           | C            | -1.479           | -1.8208          | 2.0868           |
| O            | 3.7483           | 0.8475           | 1.5321           | O            | -3.8784          | -1.0173          | 0.588            |
| C            | 3.5674           | -2.9619          | -1.9824          | C            | -1.4598          | 3.5829           | 0.3998           |
| O            | 2.05             | -0.6094          | 3.2958           | O            | -2.3919          | -1.8712          | 2.8993           |
| C            | -0.0257          | -1.0773          | 2.2906           | C            | -0.0941          | -1.6013          | 2.4717           |
| C            | 5.917            | -2.5027          | -1.7269          | C            | -3.7972          | 4.146            | 0.3185           |
| O            | 6.8635           | -1.8219          | -1.3527          | O            | -4.9828          | 3.8785           | 0.1671           |
| H            | 0.4697           | 3.3619           | 0.4644           | H            | -1.3788          | -3.4923          | -1.8379          |
| H            | 1.3679           | 4.2332           | 1.6872           | H            | -2.8121          | -4.4371          | -1.501           |

|              |                  |                  |                  |              |                  |                  |                  |
|--------------|------------------|------------------|------------------|--------------|------------------|------------------|------------------|
| H            | 1.9055           | 2.2263           | 2.8981           | H            | -3.0172          | -3.5627          | 0.7268           |
| H            | 0.1814           | 2.2126           | 2.5559           | H            | -1.3493          | -4.0678          | 0.4948           |
| H            | 3.4858           | 3.3453           | 0.942            | H            | -4.2442          | -2.4925          | -1.4961          |
| H            | 2.6457           | 4.0113           | -0.4438          | H            | -3.2958          | -2.4793          | -2.9693          |
| H            | 2.8608           | -1.503           | 0.6663           | H            | -2.0931          | 0.7295           | 1.495            |
| H            | 2.0498           | -0.9071          | -0.7759          | H            | -1.1228          | 0.8235           | 0.0313           |
| H            | 5.007            | -0.6916          | -0.0303          | H            | -4.0717          | 1.519            | 0.4108           |
| H            | 5.4593           | 0.4053           | -2.1705          | H            | -4.2196          | 2.207            | -1.9263          |
| H            | 3.7858           | 0.2704           | -2.663           | H            | -2.5235          | 1.8773           | -2.2001          |
| H            | 4.2458           | 2.5418           | -1.8935          | H            | -3.8747          | 0.0609           | -3.1089          |
| H            | 4.9459           | 1.9599           | -0.3992          | H            | -4.7517          | -0.1239          | -1.6061          |
| H            | 0.6783           | 1.9698           | -1.2196          | H            | -0.6539          | -1.4539          | -2.1863          |
| H            | 1.898            | 2.5342           | -2.3382          | H            | -1.614           | -0.658           | -3.4117          |
| H            | 1.6647           | 0.8077           | -2.0919          | H            | -0.9344          | 0.2763           | -2.0847          |
| H            | -7.6559          | -0.9439          | -1.7513          | H            | 5.9039           | 1.3227           | -2.0055          |
| H            | -7.3576          | -0.1673          | -0.2043          | H            | 7.3091           | 1.2664           | -0.9533          |
| H            | -6.6442          | 1.3764           | -1.8538          | H            | 5.6051           | 3.0764           | -0.4233          |
| H            | -5.8248          | 0.1439           | -2.8144          | H            | 6.102            | 2.0734           | 0.9383           |
| H            | -6.591           | -2.5477          | -0.2163          | H            | 6.4344           | -1.0131          | -1.2962          |
| H            | -5.555           | -2.2048          | -1.5904          | H            | 6.3116           | -0.5309          | 0.3869           |
| H            | -2.3566          | 1.1666           | 0.1878           | H            | 1.6189           | 0.8948           | 0.9313           |
| H            | -3.0872          | 0.5126           | 1.6223           | H            | 1.5673           | 0.0985           | -0.626           |
| H            | -1.6102          | -1.08            | -0.543           | H            | 2.4551           | -1.0823          | 2.062            |
| H            | -1.8271          | -3.0258          | 0.9467           | H            | 2.6473           | -3.2567          | 0.9345           |
| H            | -2.7279          | -2.0823          | 2.1263           | H            | 2.2121           | -2.5544          | -0.6142          |
| H            | -3.5299          | -2.7522          | -0.7327          | H            | 4.6592           | -1.9303          | 1.0919           |
| H            | -4.2581          | -3.3938          | 0.7308           | H            | 4.6507           | -2.7907          | -0.439           |
| H            | -5.9599          | -2.048           | 2.0284           | H            | 4.5061           | -1.5485          | -2.6248          |
| H            | -4.6689          | -0.9301          | 2.4551           | H            | 2.8697           | -1.0543          | -2.1977          |
| H            | -6.1482          | -0.3148          | 1.7317           | H            | 4.0508           | 0.1596           | -2.6667          |
| H            | -3.175           | 2.3802           | -1.1003          | H            | 3.9349           | 3.4888           | 1.5553           |
| H            | 3.6613           | 0.195            | 2.2582           | H            | -3.8047          | -1.0482          | 1.5643           |
| H            | 3.8321           | -3.8931          | -2.4759          | H            | -1.2415          | 4.6223           | 0.6287           |
| H            | 2.5045           | -2.7677          | -1.8895          | H            | -0.5891          | 2.9372           | 0.3329           |
| H            | -0.3586          | -1.8753          | 2.926            | H            | 0.2746           | -1.4684          | 3.4703           |
| H            | 6.0774           | -3.4663          | -2.2395          | H            | -3.4727          | 5.1733           | 0.5561           |
| <b>1b-15</b> | <b>X axis(Å)</b> | <b>Y axis(Å)</b> | <b>Z axis(Å)</b> | <b>1b-16</b> | <b>X axis(Å)</b> | <b>Y axis(Å)</b> | <b>Z axis(Å)</b> |
| C            | -2.8156          | -3.2342          | -1.0664          | C            | 2.212            | -3.4827          | 1.4084           |
| C            | -2.4761          | -3.0279          | 0.41             | C            | 1.6484           | -3.2422          | 0.0076           |
| C            | -1.8816          | -1.6413          | 0.6956           | C            | 1.4878           | -1.75            | -0.3231          |
| C            | -2.7842          | -0.5024          | 0.1325           | C            | 2.8077           | -0.9629          | -0.0732          |
| C            | -3.0364          | -0.6897          | -1.4095          | C            | 3.3097           | -1.1528          | 1.4056           |
| C            | -3.6562          | -2.0937          | -1.6501          | C            | 3.4807           | -2.6706          | 1.6879           |
| C            | -2.2488          | 0.9179           | 0.4222           | C            | 2.7143           | 0.5423           | -0.4145          |
| C            | -3.1837          | 2.0208           | -0.1229          | C            | 4.0656           | 1.2764           | -0.2198          |
| C            | -3.5592          | 1.8183           | -1.6004          | C            | 4.6451           | 1.0325           | 1.1853           |
| C            | -4.0423          | 0.3934           | -1.8902          | C            | 4.6878           | -0.4526          | 1.5597           |

|   |         |         |         |   |         |         |         |
|---|---------|---------|---------|---|---------|---------|---------|
| C | -1.7607 | -0.564  | -2.2849 | C | 2.3634  | -0.5619 | 2.485   |
| O | -0.5354 | -1.5747 | 0.1786  | O | 0.3726  | -1.2042 | 0.4175  |
| C | -2.64   | 3.4108  | 0.1463  | C | 4.0117  | 2.7674  | -0.5164 |
| C | 6.2871  | 0.0745  | -0.2494 | C | -6.6503 | 1.8364  | 0.7226  |
| C | 5.654   | 1.4409  | -0.0106 | C | -6.7939 | 0.3515  | 0.4162  |
| C | 4.1722  | 1.3364  | 0.2107  | C | -5.5617 | -0.272  | -0.2003 |
| C | 3.4204  | 0.3053  | -0.2345 | C | -4.3415 | 0.3205  | -0.2072 |
| C | 4.0239  | -0.8595 | -1.0366 | C | -4.1155 | 1.6922  | 0.4642  |
| C | 5.5355  | -0.6616 | -1.3496 | C | -5.3049 | 2.108   | 1.3737  |
| C | 1.9493  | 0.1205  | 0.0904  | C | -3.0894 | -0.2551 | -0.8579 |
| C | 1.7665  | -1.1475 | 0.9465  | C | -1.8886 | -0.3122 | 0.108   |
| C | 2.381   | -2.3818 | 0.2603  | C | -1.612  | 1.0787  | 0.6962  |
| C | 3.8334  | -2.1413 | -0.1806 | C | -2.8577 | 1.6476  | 1.3719  |
| C | 3.3221  | -1.0289 | -2.4055 | C | -3.9341 | 2.7701  | -0.6308 |
| C | 3.6196  | 2.4314  | 1.0578  | C | -5.8395 | -1.6069 | -0.8199 |
| O | 2.9248  | 2.2376  | 2.0474  | O | -6.9346 | -2.1546 | -0.748  |
| C | 0.3106  | -1.3632 | 1.2621  | C | -0.6216 | -0.8695 | -0.5011 |
| C | -1.6515 | -1.4793 | 2.1823  | C | 1.0087  | -1.597  | -1.7484 |
| O | -4.0821 | -0.5917 | 0.7786  | O | 3.8318  | -1.5234 | -0.9321 |
| C | -3.272  | 4.3047  | 0.9254  | C | 2.9296  | 3.5626  | -0.4705 |
| O | -2.5208 | -1.4297 | 3.0421  | O | 1.6571  | -1.8295 | -2.7588 |
| C | -0.2363 | -1.3234 | 2.4747  | C | -0.3507 | -1.0818 | -1.7874 |
| C | -1.3462 | 3.845   | -0.4523 | C | 5.2883  | 3.4224  | -0.9337 |
| O | -0.6664 | 3.1354  | -1.1833 | O | 6.3493  | 2.819   | -1.0307 |
| H | -1.8904 | -3.3529 | -1.6411 | H | 1.4446  | -3.2523 | 2.1556  |
| H | -3.363  | -4.1775 | -1.1804 | H | 2.4358  | -4.5496 | 1.5268  |
| H | -3.3859 | -3.1776 | 1.0055  | H | 2.3104  | -3.7204 | -0.7258 |
| H | -1.7725 | -3.813  | 0.7155  | H | 0.681   | -3.7551 | -0.0674 |
| H | -4.6595 | -2.1415 | -1.207  | H | 4.2946  | -3.0774 | 1.0737  |
| H | -3.7935 | -2.2664 | -2.7252 | H | 3.7831  | -2.8292 | 2.7309  |
| H | -2.1684 | 1.0685  | 1.5069  | H | 2.4256  | 0.6667  | -1.4662 |
| H | -1.2369 | 1.0262  | 0.0214  | H | 1.9257  | 1.0079  | 0.1852  |
| H | -4.1257 | 1.9291  | 0.4384  | H | 4.7598  | 0.8315  | -0.9467 |
| H | -4.3553 | 2.5223  | -1.8755 | H | 5.6658  | 1.4309  | 1.2457  |
| H | -2.7157 | 2.0535  | -2.258  | H | 4.0646  | 1.5865  | 1.9333  |
| H | -4.2238 | 0.2913  | -2.9679 | H | 5.0489  | -0.5492 | 2.5917  |
| H | -5.0182 | 0.2477  | -1.4095 | H | 5.4399  | -0.9504 | 0.934   |
| H | -1.058  | -1.3877 | -2.1451 | H | 1.4151  | -1.0964 | 2.5662  |
| H | -2.0257 | -0.5693 | -3.3493 | H | 2.8306  | -0.6209 | 3.4757  |
| H | -1.2092 | 0.3609  | -2.0977 | H | 2.1232  | 0.4896  | 2.3085  |
| H | 7.3372  | 0.2013  | -0.5363 | H | -6.7583 | 2.4227  | -0.197  |
| H | 6.2789  | -0.5143 | 0.6757  | H | -7.4601 | 2.1525  | 1.3904  |
| H | 5.8416  | 2.0999  | -0.8672 | H | -7.6581 | 0.2317  | -0.2488 |
| H | 6.1408  | 1.8975  | 0.8597  | H | -7.0252 | -0.1877 | 1.3439  |
| H | 5.6528  | -0.0821 | -2.2762 | H | -5.2322 | 3.1706  | 1.6376  |
| H | 6.0161  | -1.6299 | -1.5376 | H | -5.2681 | 1.5556  | 2.3228  |
| H | 1.5184  | 0.9806  | 0.6109  | H | -3.2482 | -1.2611 | -1.2506 |

|              |                  |                  |                  |              |                  |                  |                  |
|--------------|------------------|------------------|------------------|--------------|------------------|------------------|------------------|
| H            | 1.3753           | 0.0539           | -0.8416          | H            | -2.8455          | 0.3644           | -1.7304          |
| H            | 2.308            | -0.9941          | 1.8916           | H            | -2.1667          | -0.985           | 0.9326           |
| H            | 2.356            | -3.2367          | 0.9482           | H            | -0.8067          | 1.0235           | 1.4401           |
| H            | 1.782            | -2.6772          | -0.6098          | H            | -1.26            | 1.7632           | -0.0854          |
| H            | 4.4571           | -2.0811          | 0.7213           | H            | -3.0654          | 1.0304           | 2.2572           |
| H            | 4.1819           | -3.0213          | -0.7361          | H            | -2.6304          | 2.6535           | 1.748            |
| H            | 3.7982           | -1.8257          | -2.9893          | H            | -3.8203          | 3.7656           | -0.1862          |
| H            | 2.2634           | -1.2893          | -2.3216          | H            | -3.0491          | 2.5949           | -1.2503          |
| H            | 3.3815           | -0.105           | -2.9933          | H            | -4.7937          | 2.8067           | -1.309           |
| H            | 3.9323           | 3.4454           | 0.7563           | H            | -5.0151          | -2.0954          | -1.3528          |
| H            | -3.9453          | -0.6322          | 1.7484           | H            | 3.5097           | -1.5171          | -1.8576          |
| H            | -2.8792          | 5.2981           | 1.1202           | H            | 2.975            | 4.6217           | -0.7092          |
| H            | -4.2187          | 4.0604           | 1.3999           | H            | 1.9533           | 3.1898           | -0.181           |
| H            | 0.2032           | -1.15            | 3.438            | H            | -0.9253          | -0.9097          | -2.677           |
| H            | -1.0212          | 4.8679           | -0.1969          | H            | 5.2258           | 4.5015           | -1.1542          |
| <b>1b-17</b> | <b>X axis(Å)</b> | <b>Y axis(Å)</b> | <b>Z axis(Å)</b> | <b>1b-18</b> | <b>X axis(Å)</b> | <b>Y axis(Å)</b> | <b>Z axis(Å)</b> |
| C            | -2.2046          | -3.5552          | -0.9265          | C            | -2.71            | -3.0876          | -1.831           |
| C            | -1.9107          | -3.2259          | 0.5373           | C            | -2.0591          | -3.1554          | -0.4492          |
| C            | -1.5619          | -1.7454          | 0.757            | C            | -1.7141          | -1.7686          | 0.1141           |
| C            | -2.6427          | -0.8062          | 0.1462           | C            | -2.9485          | -0.8181          | 0.0904           |
| C            | -2.8523          | -1.1045          | -1.3845          | C            | -3.5394          | -0.6929          | -1.3627          |
| C            | -3.2246          | -2.6026          | -1.5586          | C            | -3.8906          | -2.1127          | -1.8867          |
| C            | -2.3598          | 0.6988           | 0.3613           | C            | -2.6713          | 0.5821           | 0.6835           |
| C            | -3.492           | 1.5974           | -0.1988          | C            | -3.9303          | 1.479            | 0.6752           |
| C            | -3.7996          | 1.2678           | -1.6707          | C            | -4.6116          | 1.5461           | -0.7019          |
| C            | -4.0238          | -0.2293          | -1.9084          | C            | -4.8394          | 0.1573           | -1.3074          |
| C            | -1.6142          | -0.8059          | -2.2723          | C            | -2.5838          | -0.0192          | -2.3831          |
| O            | -0.2418          | -1.4742          | 0.2329           | O            | -0.5846          | -1.2229          | -0.6003          |
| C            | -3.2427          | 3.0889           | -0.0328          | C            | -3.6598          | 2.8579           | 1.2457           |
| C            | 6.5136           | 0.3797           | -0.2311          | C            | 6.5556           | 1.5537           | -0.7455          |
| C            | 5.8391           | 1.7424           | -0.1302          | C            | 6.6614           | 0.0476           | -0.5402          |
| C            | 4.3425           | 1.6391           | 0.0394           | C            | 5.4198           | -0.5675          | 0.0497           |
| C            | 3.638            | 0.5249           | -0.2748          | C            | 4.2104           | 0.0403           | 0.0816           |
| C            | 4.3036           | -0.6923          | -0.9534          | C            | 4.0121           | 1.4581           | -0.4818          |
| C            | 5.8075           | -0.4668          | -1.2758          | C            | 5.2109           | 1.9096           | -1.3633          |
| C            | 2.1756           | 0.2871           | 0.0709           | C            | 2.9563           | -0.5877          | 0.6755           |
| C            | 2.0337           | -0.9307          | 1.0089           | C            | 1.741            | -0.5204          | -0.2719          |
| C            | 2.7146           | -2.1818          | 0.4309           | C            | 1.4961           | 0.9259           | -0.7276          |
| C            | 4.1608           | -1.903           | 0.0057           | C            | 2.747            | 1.5163           | -1.3751          |
| C            | 3.624            | -1.0094          | -2.3088          | C            | 3.866            | 2.449            | 0.6973           |
| C            | 3.7205           | 2.8669           | 0.6247           | C            | 5.6744           | -1.9155          | 0.6427           |
| O            | 4.3771           | 3.8332           | 0.9969           | O            | 5.1976           | -2.2995          | 1.7025           |
| C            | 0.5855           | -1.2052          | 1.3183           | C            | 0.4686           | -1.1007          | 0.3055           |
| C            | -1.364           | -1.4851          | 2.2344           | C            | -1.154           | -1.9108          | 1.5101           |
| O            | -3.9038          | -1.0921          | 0.8001           | O            | -3.9909          | -1.4106          | 0.9111           |
| C            | -2.054           | 3.7008           | 0.1              | C            | -4.2631          | 3.3224           | 2.3528           |
| O            | -2.2377          | -1.4762          | 3.0899           | O            | -1.7763          | -2.2706          | 2.5004           |

|              |                  |                  |                  |              |                  |                  |                  |
|--------------|------------------|------------------|------------------|--------------|------------------|------------------|------------------|
| C            | 0.0305           | -1.1947          | 2.5277           | C            | 0.2415           | -1.5058          | 1.554            |
| C            | -4.4447          | 3.9752           | 0.0203           | C            | -2.6887          | 3.7722           | 0.5824           |
| O            | -5.5905          | 3.5543           | -0.0769          | O            | -2.046           | 3.4675           | -0.4143          |
| H            | -2.583           | -4.5821          | -0.9944          | H            | -1.9568          | -2.8103          | -2.5767          |
| H            | -1.2705          | -3.5411          | -1.4988          | H            | -3.058           | -4.0885          | -2.1133          |
| H            | -2.7838          | -3.5001          | 1.1434           | H            | -2.7368          | -3.682           | 0.2351           |
| H            | -1.0856          | -3.8659          | 0.8753           | H            | -1.1538          | -3.7715          | -0.5241          |
| H            | -4.207           | -2.7998          | -1.1099          | H            | -4.7161          | -2.5353          | -1.2993          |
| H            | -3.3266          | -2.8451          | -2.624           | H            | -4.2558          | -2.0539          | -2.92            |
| H            | -2.2779          | 0.9107           | 1.4352           | H            | -2.3501          | 0.4842           | 1.7289           |
| H            | -1.3951          | 0.9603           | -0.0851          | H            | -1.8425          | 1.0574           | 0.151            |
| H            | -4.389           | 1.357            | 0.3894           | H            | -4.6572          | 0.9932           | 1.3433           |
| H            | -4.6989          | 1.8051           | -1.9968          | H            | -5.5816          | 2.0513           | -0.6067          |
| H            | -2.9876          | 1.6277           | -2.3145          | H            | -4.0276          | 2.154            | -1.4012          |
| H            | -4.1744          | -0.4004          | -2.982           | H            | -5.2609          | 0.2726           | -2.3143          |
| H            | -4.9646          | -0.5238          | -1.4257          | H            | -5.6089          | -0.3606          | -0.7207          |
| H            | -0.7795          | -1.486           | -2.0921          | H            | -1.7114          | -0.6293          | -2.6248          |
| H            | -1.8702          | -0.9153          | -3.3334          | H            | -3.1025          | 0.1577           | -3.3333          |
| H            | -1.2328          | 0.2098           | -2.1401          | H            | -2.2111          | 0.9483           | -2.0376          |
| H            | 7.5666           | 0.5106           | -0.5056          | H            | 6.6877           | 2.0734           | 0.2104           |
| H            | 6.4996           | -0.124           | 0.7428           | H            | 7.3681           | 1.8921           | -1.3989          |
| H            | 6.0528           | 2.3337           | -1.0292          | H            | 7.5274           | -0.1527          | 0.1027           |
| H            | 6.2912           | 2.2693           | 0.7186           | H            | 6.8619           | -0.4367          | -1.5045          |
| H            | 5.9135           | 0.04             | -2.2453          | H            | 5.1655           | 2.9908           | -1.5452          |
| H            | 6.325            | -1.4286          | -1.3811          | H            | 5.1542           | 1.4318           | -2.3511          |
| H            | 1.7112           | 1.1436           | 0.5649           | H            | 3.1085           | -1.641           | 0.9249           |
| H            | 1.6012           | 0.1473           | -0.8525          | H            | 2.734            | -0.075           | 1.62             |
| H            | 2.5482           | -0.6838          | 1.9495           | H            | 1.9866           | -1.1203          | -1.1606          |
| H            | 2.714            | -2.9829          | 1.1813           | H            | 0.6786           | 0.9615           | -1.4591          |
| H            | 2.1489           | -2.5706          | -0.4246          | H            | 1.1764           | 1.5467           | 0.1184           |
| H            | 4.7571           | -1.7327          | 0.9118           | H            | 2.9297           | 0.9668           | -2.309           |
| H            | 4.568            | -2.8074          | -0.4642          | H            | 2.5407           | 2.5541           | -1.6672          |
| H            | 4.1273           | -1.8454          | -2.809           | H            | 3.7555           | 3.4772           | 0.334            |
| H            | 2.5705           | -1.2861          | -2.2127          | H            | 2.9921           | 2.2329           | 1.3201           |
| H            | 3.6684           | -0.1443          | -2.9812          | H            | 4.7391           | 2.4239           | 1.3585           |
| H            | 2.6257           | 2.8863           | 0.6949           | H            | 6.3751           | -2.5433          | 0.0662           |
| H            | -3.7845          | -1.0136          | 1.7696           | H            | -3.6062          | -1.6439          | 1.7822           |
| H            | -1.964           | 4.7765           | 0.2264           | H            | -4.0682          | 4.3099           | 2.7601           |
| H            | -1.1187          | 3.1531           | 0.0776           | H            | -4.9842          | 2.7139           | 2.8922           |
| H            | 0.4501           | -1.0041          | 3.4967           | H            | 0.8703           | -1.5179          | 2.4236           |
| H            | -4.2436          | 5.0517           | 0.1533           | H            | -2.5699          | 4.7645           | 1.0501           |
| <b>1b-19</b> | <b>X axis(Å)</b> | <b>Y axis(Å)</b> | <b>Z axis(Å)</b> | <b>1b-20</b> | <b>X axis(Å)</b> | <b>Y axis(Å)</b> | <b>Z axis(Å)</b> |
| C            | -3.4275          | -2.7895          | -1.2852          | C            | -2.2646          | -3.4793          | -1.3451          |
| C            | -3.0509          | -2.7719          | 0.1955           | C            | -2.0237          | -3.3386          | 0.1588           |
| C            | -2.1838          | -1.5663          | 0.5852           | C            | -1.5772          | -1.9258          | 0.5607           |
| C            | -2.806           | -0.2189          | 0.1032           | C            | -2.5494          | -0.8387          | 0.0108           |
| C            | -3.0893          | -0.2439          | -1.4432          | C            | -2.6915          | -0.9467          | -1.552           |

|   |         |         |         |   |         |         |         |
|---|---------|---------|---------|---|---------|---------|---------|
| C | -4.0048 | -1.4551 | -1.7672 | C | -3.1697 | -2.38   | -1.9128 |
| C | -1.9511 | 1.0128  | 0.4677  | C | -2.1659 | 0.6041  | 0.4121  |
| C | -2.5635 | 2.3455  | -0.0132 | C | -3.1818 | 1.6567  | -0.0965 |
| C | -3.0279 | 2.3239  | -1.4802 | C | -3.4232 | 1.517   | -1.6108 |
| C | -3.8277 | 1.0664  | -1.8352 | C | -3.7559 | 0.0797  | -2.0278 |
| C | -1.8157 | -0.3504 | -2.3243 | C | -1.3846 | -0.6588 | -2.3393 |
| O | -0.8358 | -1.7391 | 0.0927  | O | -0.2153 | -1.7053 | 0.1294  |
| C | -1.6252 | 3.5017  | 0.2852  | C | -2.8128 | 3.0902  | 0.2582  |
| C | 6.015   | 0.2406  | -0.9631 | C | 6.2119  | 1.2043  | -1.0344 |
| C | 5.578   | 1.0674  | 0.2398  | C | 5.4007  | 2.2342  | -0.2562 |
| C | 4.1159  | 0.9209  | 0.5775  | C | 3.9828  | 1.8053  | 0.0224  |
| C | 3.332   | -0.0789 | 0.1085  | C | 3.5303  | 0.5405  | -0.1438 |
| C | 3.8854  | -1.168  | -0.8296 | C | 4.4676  | -0.6048 | -0.5713 |
| C | 5.4392  | -1.165  | -0.8734 | C | 5.9638  | -0.1921 | -0.482  |
| C | 1.8531  | -0.2278 | 0.4271  | C | 2.0855  | 0.11    | 0.0537  |
| C | 1.4894  | -1.6402 | 0.9253  | C | 1.9761  | -1.0536 | 1.0544  |
| C | 1.9523  | -2.7111 | -0.0674 | C | 2.8166  | -2.2441 | 0.5756  |
| C | 3.45    | -2.578  | -0.3443 | C | 4.2755  | -1.8306 | 0.3651  |
| C | 3.3514  | -0.9185 | -2.2602 | C | 4.1548  | -1.0078 | -2.0316 |
| C | 3.63    | 2.0252  | 1.4668  | C | 3.1182  | 2.9334  | 0.4897  |
| O | 2.5173  | 2.5326  | 1.4196  | O | 2.244   | 2.828   | 1.3404  |
| C | 0.0095  | -1.7166 | 1.1984  | C | 0.54    | -1.4505 | 1.269   |
| C | -1.9656 | -1.5718 | 2.0831  | C | -1.4442 | -1.8338 | 2.0653  |
| O | -4.0896 | -0.0444 | 0.7573  | O | -3.8648 | -1.0905 | 0.565   |
| C | -1.927  | 4.4902  | 1.1431  | C | -1.5975 | 3.5563  | 0.593   |
| O | -2.83   | -1.4314 | 2.9377  | O | -2.3525 | -1.938  | 2.8776  |
| C | -0.5529 | -1.6884 | 2.4042  | C | -0.0748 | -1.5292 | 2.4467  |
| C | -0.2808 | 3.5617  | -0.3633 | C | -3.9222 | 4.0903  | 0.285   |
| O | 0.0714  | 2.7925  | -1.2495 | O | -5.0853 | 3.8084  | 0.0255  |
| H | -2.5506 | -3.0611 | -1.8829 | H | -1.3028 | -3.483  | -1.8697 |
| H | -4.1651 | -3.5823 | -1.4583 | H | -2.7193 | -4.4568 | -1.5455 |
| H | -3.9741 | -2.7757 | 0.7893  | H | -2.9458 | -3.6073 | 0.6901  |
| H | -2.5266 | -3.7072 | 0.43    | H | -1.267  | -4.0751 | 0.458   |
| H | -4.9908 | -1.3153 | -1.3055 | H | -4.1884 | -2.5417 | -1.5371 |
| H | -4.1841 | -1.5145 | -2.8484 | H | -3.2295 | -2.4949 | -3.0026 |
| H | -1.8479 | 1.0789  | 1.5591  | H | -2.1333 | 0.6875  | 1.5061  |
| H | -0.9396 | 0.892   | 0.0723  | H | -1.1596 | 0.8314  | 0.0467  |
| H | -3.4752 | 2.4954  | 0.5844  | H | -4.1312 | 1.4382  | 0.4129  |
| H | -2.1816 | 2.4094  | -2.1689 | H | -4.253  | 2.1633  | -1.9224 |
| H | -3.6522 | 3.2056  | -1.6753 | H | -2.5458 | 1.8712  | -2.1657 |
| H | -4.0408 | 1.0734  | -2.912  | H | -3.8583 | 0.0409  | -3.1199 |
| H | -4.8054 | 1.118   | -1.3392 | H | -4.7437 | -0.1823 | -1.6272 |
| H | -1.3028 | -1.3092 | -2.2276 | H | -0.6209 | -1.427  | -2.2043 |
| H | -2.0758 | -0.2481 | -3.3849 | H | -1.5885 | -0.6217 | -3.4166 |
| H | -1.0797 | 0.425   | -2.1002 | H | -0.9282 | 0.2966  | -2.0684 |
| H | 5.6946  | 0.7282  | -1.8909 | H | 5.9514  | 1.2473  | -2.0981 |
| H | 7.1097  | 0.1943  | -0.9972 | H | 7.278   | 1.4499  | -0.9645 |

|             |                  |                  |                  |             |                  |                  |                  |
|-------------|------------------|------------------|------------------|-------------|------------------|------------------|------------------|
| H           | 5.8172           | 2.119            | 0.0388           | H           | 5.4129           | 3.1753           | -0.8192          |
| H           | 6.1664           | 0.7689           | 1.117            | H           | 5.8946           | 2.4312           | 0.704            |
| H           | 5.7991           | -1.7638          | -1.7195          | H           | 6.5931           | -0.9156          | -1.0151          |
| H           | 5.8437           | -1.6409          | 0.0305           | H           | 6.2999           | -0.2088          | 0.564            |
| H           | 1.5242           | 0.479            | 1.1926           | H           | 1.4363           | 0.9251           | 0.3791           |
| H           | 1.28             | 0.0176           | -0.4761          | H           | 1.6814           | -0.1884          | -0.9226          |
| H           | 2.0247           | -1.8099          | 1.8712           | H           | 2.3875           | -0.7128          | 2.0159           |
| H           | 1.7501           | -3.7098          | 0.3399           | H           | 2.7792           | -3.052           | 1.3173           |
| H           | 1.3937           | -2.6433          | -1.0085          | H           | 2.408            | -2.6594          | -0.3538          |
| H           | 3.9842           | -2.8285          | 0.5828           | H           | 4.7005           | -1.6062          | 1.3534           |
| H           | 3.7447           | -3.3361          | -1.0813          | H           | 4.8382           | -2.6902          | -0.0209          |
| H           | 3.7571           | -1.6547          | -2.9638          | H           | 4.8502           | -1.779           | -2.3827          |
| H           | 2.2605           | -0.9868          | -2.319           | H           | 3.1452           | -1.4137          | -2.1483          |
| H           | 3.6259           | 0.0765           | -2.6273          | H           | 4.2355           | -0.1539          | -2.7131          |
| H           | 4.3871           | 2.3933           | 2.1806           | H           | 3.3499           | 3.9093           | 0.0303           |
| H           | -3.9758          | -0.1884          | 1.7196           | H           | -3.7943          | -1.1403          | 1.5409           |
| H           | -1.244           | 5.3063           | 1.3593           | H           | -1.4216          | 4.5964           | 0.8534           |
| H           | -2.8816          | 4.508            | 1.6613           | H           | -0.7183          | 2.9199           | 0.6263           |
| H           | -0.117           | -1.6337          | 3.3829           | H           | 0.2859           | -1.3567          | 3.4424           |
| H           | 0.3888           | 4.3623           | -0.0057          | H           | -3.635           | 5.1202           | 0.5571           |
| <b>1c-1</b> | <b>X axis(Å)</b> | <b>Y axis(Å)</b> | <b>Z axis(Å)</b> | <b>1c-2</b> | <b>X axis(Å)</b> | <b>Y axis(Å)</b> | <b>Z axis(Å)</b> |
| C           | 3.275            | -2.0522          | 2.4671           | C           | 1.66             | -3.0381          | 1.9006           |
| C           | 2.9305           | -2.6849          | 1.1185           | C           | 1.4451           | -3.1216          | 0.3892           |
| C           | 2.1491           | -1.739           | 0.1961           | C           | 1.4938           | -1.7469          | -0.2947          |
| C           | 2.866            | -0.3634          | 0.0403           | C           | 2.7935           | -0.9708          | 0.0722           |
| C           | 3.1049           | 0.3063           | 1.4448           | C           | 2.9387           | -0.8167          | 1.6317           |
| C           | 3.9239           | -0.6705          | 2.332            | C           | 2.9027           | -2.2272          | 2.2819           |
| C           | 2.1328           | 0.6124           | -0.9069          | C           | 2.9164           | 0.4051           | -0.6209          |
| C           | 2.8563           | 1.9703           | -1.0436          | C           | 4.234            | 1.1272           | -0.2568          |
| C           | 3.2222           | 2.6031           | 0.3089           | C           | 4.4788           | 1.2046           | 1.2595           |
| C           | 3.9203           | 1.6134           | 1.2465           | C           | 4.3082           | -0.1534          | 1.9474           |
| C           | 1.8043           | 0.6813           | 2.2058           | C           | 1.8353           | 0.0527           | 2.2921           |
| O           | 0.7968           | -1.5868          | 0.6791           | O           | 0.2996           | -1.0026          | 0.031            |
| C           | 2.0965           | 2.9426           | -1.9268          | C           | 4.3508           | 2.4852           | -0.9218          |
| C           | -6.1402          | 0.7202           | 0.2225           | C           | -6.249           | 1.7582           | 0.8461           |
| C           | -5.1713          | 1.3309           | 1.2267           | C           | -6.4759          | 0.4243           | 0.1469           |
| C           | -3.7195          | 1.0151           | 0.9514           | C           | -5.2171          | -0.3905          | -0.0434          |
| C           | -3.308           | 0.0315           | 0.1132           | C           | -3.9656          | 0.1156           | 0.0857           |
| C           | -4.3202          | -0.8458          | -0.6494          | C           | -3.7355          | 1.6052           | 0.4236           |
| C           | -5.757           | -0.721           | -0.0717          | C           | -5.0287          | 2.4525           | 0.2655           |
| C           | -1.8507          | -0.3024          | -0.1736          | C           | -2.6771          | -0.6844          | -0.0673          |
| C           | -1.5292          | -1.8069          | -0.0414          | C           | -1.6896          | -0.032           | -1.0518          |
| C           | -2.4756          | -2.6361          | -0.9176          | C           | -1.3905          | 1.4168           | -0.6484          |
| C           | -3.9314          | -2.3457          | -0.557           | C           | -2.6811          | 2.2241           | -0.5331          |
| C           | -4.3428          | -0.4031          | -2.1321          | C           | -3.2473          | 1.7212           | 1.8874           |
| C           | -2.7796          | 1.9284           | 1.6797           | C           | -5.4986          | -1.8254          | -0.3642          |
| O           | -3.1585          | 2.6733           | 2.5787           | O           | -6.6286          | -2.2413          | -0.5981          |



|             |                  |                  |                  |             |                  |                  |                  |
|-------------|------------------|------------------|------------------|-------------|------------------|------------------|------------------|
| C           | -0.0619          | -2.0336          | -0.3227          | C           | -0.4114          | -0.8231          | -1.1505          |
| C           | 1.9197           | -2.4025          | -1.1424          | C           | 1.3515           | -1.9171          | -1.7911          |
| O           | 4.1751           | -0.5918          | -0.5425          | O           | 3.93             | -1.7571          | -0.3746          |
| C           | 2.6108           | 3.4587           | -3.0557          | C           | 5.3193           | 2.7874           | -1.8027          |
| O           | 2.7845           | -2.7036          | -1.9537          | O           | 2.1738           | -2.4285          | -2.5388          |
| C           | 0.4986           | -2.5813          | -1.3992          | C           | 0.1036           | -1.3391          | -2.2638          |
| C           | 0.7159           | 3.3748           | -1.5648          | C           | 3.3698           | 3.5631           | -0.6137          |
| O           | 0.0971           | 2.9315           | -0.6047          | O           | 2.4172           | 3.4132           | 0.1412           |
| H           | 3.9568           | -2.7167          | 3.0114           | H           | 1.7553           | -4.0525          | 2.3062           |
| H           | 2.3697           | -1.985           | 3.0805           | H           | 0.7698           | -2.6084          | 2.3731           |
| H           | 3.8615           | -3.0008          | 0.6303           | H           | 2.2081           | -3.7833          | -0.0405          |
| H           | 2.3514           | -3.5987          | 1.3035           | H           | 0.4766           | -3.6041          | 0.2047           |
| H           | 4.9315           | -0.7998          | 1.916            | H           | 3.7925           | -2.7986          | 1.9869           |
| H           | 4.0642           | -0.2435          | 3.3333           | H           | 2.9499           | -2.1401          | 3.375            |
| H           | 2.0713           | 0.176            | -1.9127          | H           | 2.9099           | 0.2725           | -1.7108          |
| H           | 1.1033           | 0.7484           | -0.5685          | H           | 2.0462           | 1.0233           | -0.3821          |
| H           | 3.8134           | 1.7564           | -1.5427          | H           | 5.0463           | 0.5027           | -0.658           |
| H           | 3.8884           | 3.4599           | 0.144            | H           | 5.4971           | 1.5687           | 1.4482           |
| H           | 2.3339           | 3.0102           | 0.8046           | H           | 3.8109           | 1.9345           | 1.7295           |
| H           | 4.0958           | 2.1023           | 2.2134           | H           | 4.4255           | -0.0211          | 3.0307           |
| H           | 4.9154           | 1.3858           | 0.8433           | H           | 5.1307           | -0.8109          | 1.6376           |
| H           | 1.2443           | -0.1866          | 2.5589           | H           | 0.8502           | -0.4175          | 2.28             |
| H           | 2.0411           | 1.2717           | 3.0994           | H           | 2.0717           | 0.2329           | 3.348            |
| H           | 1.1179           | 1.2784           | 1.6003           | H           | 1.7278           | 1.0311           | 1.8171           |
| H           | -7.1589          | 0.7612           | 0.6252           | H           | -7.1346          | 2.3921           | 0.7218           |
| H           | -6.1474          | 1.3118           | -0.7             | H           | -6.1265          | 1.6022           | 1.924            |
| H           | -5.4177          | 0.9669           | 2.2325           | H           | -6.9224          | 0.6045           | -0.8395          |
| H           | -5.334           | 2.4158           | 1.2297           | H           | -7.2119          | -0.1383          | 0.7344           |
| H           | -5.8395          | -1.2929          | 0.8629           | H           | -5.2239          | 2.6513           | -0.7974          |
| H           | -6.4866          | -1.1605          | -0.7635          | H           | -4.9038          | 3.4339           | 0.7402           |
| H           | -1.6088          | 0.0441           | -1.1871          | H           | -2.2177          | -0.7862          | 0.9245           |
| H           | -1.1738          | 0.2363           | 0.4928           | H           | -2.855           | -1.7057          | -0.41            |
| H           | -1.7055          | -2.1059          | 1.0023           | H           | -2.1658          | -0.0145          | -2.0431          |
| H           | -2.3094          | -2.4313          | -1.9815          | H           | -0.8406          | 1.4544           | 0.2999           |
| H           | -2.2799          | -3.7058          | -0.7709          | H           | -0.7412          | 1.8876           | -1.3977          |
| H           | -4.5846          | -2.9432          | -1.2061          | H           | -2.4353          | 3.2446           | -0.212           |
| H           | -4.1022          | -2.7087          | 0.466            | H           | -3.1081          | 2.3153           | -1.5416          |
| H           | -3.3741          | -0.5365          | -2.624           | H           | -2.2872          | 1.2218           | 2.0508           |
| H           | -5.0768          | -0.9831          | -2.7034          | H           | -3.1148          | 2.7707           | 2.1746           |
| H           | -4.6047          | 0.6555           | -2.2359          | H           | -3.9603          | 1.2736           | 2.5885           |
| H           | -1.7252          | 1.9138           | 1.3737           | H           | -4.6439          | -2.5125          | -0.3836          |
| H           | 4.0722           | -1.1578          | -1.3356          | H           | 3.7946           | -1.9951          | -1.3158          |
| H           | 2.0671           | 4.1556           | -3.6865          | H           | 5.4017           | 3.7606           | -2.2774          |
| H           | 3.6124           | 3.194            | -3.3845          | H           | 6.0728           | 2.0537           | -2.0772          |
| H           | 0.0706           | -2.9848          | -2.2963          | H           | -0.2445          | -1.3173          | -3.2784          |
| H           | 0.261            | 4.1275           | -2.2312          | H           | 3.5454           | 4.5285           | -1.1182          |
| <b>1c-3</b> | <b>X axis(Å)</b> | <b>Y axis(Å)</b> | <b>Z axis(Å)</b> | <b>1c-4</b> | <b>X axis(Å)</b> | <b>Y axis(Å)</b> | <b>Z axis(Å)</b> |

|   |         |         |         |   |         |         |         |
|---|---------|---------|---------|---|---------|---------|---------|
| C | 1.7676  | -3.0382 | 1.9057  | C | 3.0813  | -2.1824 | 2.49    |
| C | 1.4972  | -3.1303 | 0.4038  | C | 2.7382  | -2.7796 | 1.125   |
| C | 1.4918  | -1.7568 | -0.2843 | C | 2.0417  | -1.7791 | 0.1921  |
| C | 2.7884  | -0.9534 | 0.0313  | C | 2.8435  | -0.4477 | 0.0726  |
| C | 2.9895  | -0.792  | 1.5839  | C | 3.0826  | 0.1921  | 1.4909  |
| C | 3.0071  | -2.2011 | 2.2379  | C | 3.8159  | -0.8414 | 2.389   |
| C | 2.8566  | 0.4228  | -0.6687 | C | 2.1965  | 0.5803  | -0.8823 |
| C | 4.1718  | 1.1729  | -0.3563 | C | 3.0044  | 1.8931  | -0.9833 |
| C | 4.4726  | 1.2593  | 1.1494  | C | 3.3709  | 2.4887  | 0.3859  |
| C | 4.3562  | -0.1001 | 1.8459  | C | 3.981   | 1.449   | 1.3306  |
| C | 1.8944  | 0.0566  | 2.284   | C | 1.786   | 0.6373  | 2.22    |
| O | 0.2963  | -1.0359 | 0.0858  | O | 0.6876  | -1.5506 | 0.6383  |
| C | 4.2347  | 2.5313  | -1.0276 | C | 2.3287  | 2.918   | -1.8751 |
| C | -6.0213 | 2.0077  | -0.1306 | C | -6.0382 | 0.0129  | 0.8968  |
| C | -6.4066 | 0.5378  | -0.0164 | C | -5.1901 | 1.1861  | 1.3743  |
| C | -5.2075 | -0.3792 | -0.0044 | C | -3.7409 | 1.0522  | 0.9752  |
| C | -3.9542 | 0.0461  | 0.2867  | C | -3.3229 | 0.2286  | -0.0162 |
| C | -3.675  | 1.4915  | 0.7538  | C | -4.3178 | -0.5258 | -0.9213 |
| C | -4.9655 | 2.3443  | 0.9078  | C | -5.8049 | -0.2195 | -0.5861 |
| C | -2.6864 | -0.7763 | 0.106   | C | -1.869  | -0.1207 | -0.292  |
| C | -1.7499 | -0.1051 | -0.9206 | C | -1.6265 | -1.6411 | -0.1419 |
| C | -1.4602 | 1.3621  | -0.5612 | C | -2.6017 | -2.4503 | -1.0131 |
| C | -2.7452 | 2.1537  | -0.2959 | C | -4.0587 | -2.0462 | -0.7565 |
| C | -2.9934 | 1.502   | 2.1447  | C | -4.124  | -0.1152 | -2.4022 |
| C | -5.5288 | -1.7899 | -0.3839 | C | -2.8091 | 1.8856  | 1.8005  |
| O | -6.6433 | -2.1405 | -0.7567 | O | -3.1811 | 2.4984  | 2.7963  |
| C | -0.4622 | -0.8723 | -1.0681 | C | -0.1674 | -1.944  | -0.3886 |
| C | 1.2956  | -1.9339 | -1.7738 | C | 1.8118  | -2.4152 | -1.1596 |
| O | 3.9229  | -1.7176 | -0.4569 | O | 4.1524  | -0.7483 | -0.4769 |
| C | 5.1622  | 2.8514  | -1.9455 | C | 2.9014  | 3.4098  | -2.9866 |
| O | 2.0986  | -2.4311 | -2.5513 | O | 2.68    | -2.7554 | -1.9516 |
| C | 0.0195  | -1.3814 | -2.1993 | C | 0.3904  | -2.5143 | -1.4546 |
| C | 3.2438  | 3.5893  | -0.684  | C | 0.9694  | 3.4328  | -1.5416 |
| O | 2.3245  | 3.4217  | 0.1074  | O | 0.303   | 3.0245  | -0.5981 |
| H | 1.899   | -4.0493 | 2.3094  | H | 3.706   | -2.8923 | 3.0454  |
| H | 0.8874  | -2.6254 | 2.4109  | H | 2.1646  | -2.0666 | 3.0785  |
| H | 2.2567  | -3.7775 | -0.0534 | H | 3.6622  | -3.1462 | 0.6593  |
| H | 0.5325  | -3.6329 | 0.2572  | H | 2.1003  | -3.6587 | 1.283   |
| H | 3.8965  | -2.7551 | 1.9104  | H | 4.8253  | -1.0274 | 1.9994  |
| H | 3.0939  | -2.11   | 3.3282  | H | 3.9535  | -0.4337 | 3.3986  |
| H | 2.8117  | 0.2869  | -1.7573 | H | 2.1366  | 0.1586  | -1.8944 |
| H | 1.9836  | 1.0236  | -0.3984 | H | 1.168   | 0.7751  | -0.5704 |
| H | 4.9811  | 0.5644  | -0.7871 | H | 3.9601  | 1.6266  | -1.4592 |
| H | 5.4896  | 1.6445  | 1.2984  | H | 4.0926  | 3.3045  | 0.2487  |
| H | 3.8082  | 1.9766  | 1.6432  | H | 2.4961  | 2.9448  | 0.8624  |
| H | 4.5119  | 0.0375  | 2.9237  | H | 4.1583  | 1.9166  | 2.3077  |
| H | 5.1796  | -0.7415 | 1.5062  | H | 4.9715  | 1.1654  | 0.9524  |

|             |                  |                  |                  |             |                  |                  |                  |
|-------------|------------------|------------------|------------------|-------------|------------------|------------------|------------------|
| H           | 0.9194           | -0.4336          | 2.3107           | H           | 1.1647           | -0.1987          | 2.5468           |
| H           | 2.1672           | 0.2448           | 3.3297           | H           | 2.0325           | 1.2028           | 3.1271           |
| H           | 1.7488           | 1.0313           | 1.8113           | H           | 1.1543           | 1.2813           | 1.6031           |
| H           | -5.6497          | 2.2254           | -1.139           | H           | -5.7931          | -0.8905          | 1.4682           |
| H           | -6.9086          | 2.6327           | 0.0223           | H           | -7.0974          | 0.227            | 1.0795           |
| H           | -7.0654          | 0.3057           | -0.8617          | H           | -5.2903          | 1.2398           | 2.4648           |
| H           | -6.9863          | 0.373            | 0.9003           | H           | -5.5846          | 2.1248           | 0.966            |
| H           | -4.7261          | 3.4139           | 0.8557           | H           | -6.4526          | -1.0324          | -0.9378          |
| H           | -5.4081          | 2.1827           | 1.9007           | H           | -6.1356          | 0.6813           | -1.1218          |
| H           | -2.191           | -0.8991          | 1.0763           | H           | -1.592           | 0.2201           | -1.297           |
| H           | -2.8857          | -1.7927          | -0.2409          | H           | -1.1852          | 0.3958           | 0.385            |
| H           | -2.2684          | -0.1078          | -1.891           | H           | -1.8357          | -1.9156          | 0.9029           |
| H           | -0.8036          | 1.4244           | 0.3152           | H           | -2.3722          | -2.324           | -2.0774          |
| H           | -0.9112          | 1.8422           | -1.3818          | H           | -2.488           | -3.5207          | -0.7993          |
| H           | -2.472           | 3.1667           | 0.0265           | H           | -4.7043          | -2.6149          | -1.4379          |
| H           | -3.2796          | 2.2682           | -1.2481          | H           | -4.3299          | -2.3622          | 0.2596           |
| H           | -2.015           | 1.0135           | 2.1533           | H           | -3.1307          | -0.3536          | -2.7923          |
| H           | -2.8377          | 2.5301           | 2.4928           | H           | -4.8508          | -0.6259          | -3.0451          |
| H           | -3.6144          | 0.9894           | 2.8892           | H           | -4.2668          | 0.9645           | -2.5316          |
| H           | -4.7196          | -2.5262          | -0.298           | H           | -1.7652          | 1.9501           | 1.4644           |
| H           | 3.7567           | -1.9611          | -1.3917          | H           | 4.0379           | -1.2986          | -1.2795          |
| H           | 5.2061           | 3.8249           | -2.4247          | H           | 2.4178           | 4.1443           | -3.6236          |
| H           | 5.9198           | 2.1329           | -2.2474          | H           | 3.8922           | 3.0853           | -3.2941          |
| H           | -0.3675          | -1.3686          | -3.1999          | H           | -0.0347          | -2.8884          | -2.3657          |
| H           | 3.3795           | 4.5568           | -1.1968          | H           | 0.5771           | 4.2154           | -2.2134          |
| <b>1c-5</b> | <b>X axis(Å)</b> | <b>Y axis(Å)</b> | <b>Z axis(Å)</b> | <b>1c-6</b> | <b>X axis(Å)</b> | <b>Y axis(Å)</b> | <b>Z axis(Å)</b> |
| C           | -2.8627          | -3.3756          | -0.8834          | C           | 1.4748           | -3.1888          | 1.6883           |
| C           | -2.2514          | -3.0551          | 0.4806           | C           | 1.3161           | -3.0666          | 0.173            |
| C           | -1.8466          | -1.5791          | 0.6187           | C           | 1.4151           | -1.6157          | -0.325           |
| C           | -3.0274          | -0.6271          | 0.2648           | C           | 2.7062           | -0.9175          | 0.1933           |
| C           | -3.5756          | -0.9172          | -1.1813          | C           | 2.7937           | -0.9784          | 1.7627           |
| C           | -3.9884          | -2.4121          | -1.2727          | C           | 2.715            | -2.4617          | 2.2168           |
| C           | -2.6912          | 0.8728           | 0.4255           | C           | 2.874            | 0.5393           | -0.2975          |
| C           | -3.9011          | 1.7796           | 0.1018           | C           | 4.2047           | 1.1713           | 0.1791           |
| C           | -4.5446          | 1.4607           | -1.2582          | C           | 4.3709           | 1.0448           | 1.7073           |
| C           | -4.8299          | -0.0344          | -1.432           | C           | 4.1608           | -0.388           | 2.2079           |
| C           | -2.5611          | -0.6216          | -2.3177          | C           | 1.6772           | -0.187           | 2.4959           |
| O           | -0.6692          | -1.3235          | -0.1782          | O           | 0.219            | -0.8926          | 0.0475           |
| C           | -3.5739          | 3.2536           | 0.2452           | C           | 4.3413           | 2.5915           | -0.3497          |
| C           | 6.7923           | 0.2773           | -0.8158          | C           | -6.4048          | 1.6812           | 0.9176           |
| C           | 6.047            | 1.5682           | -0.5027          | C           | -6.5813          | 0.4551           | 0.0315           |
| C           | 4.7054           | 1.3603           | 0.1634           | C           | -5.3044          | -0.3173          | -0.2095          |
| C           | 4.0731           | 0.1617           | 0.2234           | C           | -4.0669          | 0.1735           | 0.0496           |
| C           | 4.6722           | -1.0935          | -0.4467          | C           | -3.8726          | 1.6027           | 0.6015           |
| C           | 5.84             | -0.7459          | -1.4111          | C           | -5.1671          | 2.4562           | 0.4983           |
| C           | 2.7535           | -0.1016          | 0.9385           | C           | -2.7627          | -0.5901          | -0.1492          |
| C           | 1.7098           | -0.7767          | 0.0269           | C           | -1.7372          | 0.1988           | -0.9838          |

|   |         |         |         |   |         |         |         |
|---|---------|---------|---------|---|---------|---------|---------|
| C | 2.2787  | -2.0743 | -0.5631 | C | -1.476  | 1.5787  | -0.3691 |
| C | 3.5931  | -1.8152 | -1.2975 | C | -2.7809 | 2.3547  | -0.2069 |
| C | 5.2057  | -2.0502 | 0.6459  | C | -3.457  | 1.517   | 2.0896  |
| C | 4.1563  | 2.6183  | 0.7628  | C | -5.5531 | -1.6944 | -0.742  |
| O | 4.7499  | 3.6906  | 0.7118  | O | -6.6681 | -2.0827 | -1.0745 |
| C | 0.3827  | -1.0541 | 0.6964  | C | -0.448  | -0.5668 | -1.129  |
| C | -1.3286 | -1.324  | 2.015   | C | 1.3296  | -1.5984 | -1.8359 |
| O | -4.1187 | -0.9024 | 1.1835  | O | 3.8462  | -1.6599 | -0.3078 |
| C | -4.1801 | 4.0547  | 1.1373  | C | 4.1968  | 3.7331  | 0.3437  |
| O | -1.9943 | -1.3188 | 3.0415  | O | 2.1604  | -2.0451 | -2.6135 |
| C | 0.0964  | -1.0351 | 1.9968  | C | 0.1092  | -0.9423 | -2.2776 |
| C | -2.5406 | 3.884   | -0.6231 | C | 4.7165  | 2.7451  | -1.7876 |
| O | -1.8853 | 3.2625  | -1.4499 | O | 4.8572  | 1.7931  | -2.545  |
| H | -3.2559 | -4.3992 | -0.869  | H | 1.539   | -4.2498 | 1.9581  |
| H | -2.0774 | -3.3664 | -1.6473 | H | 0.5742  | -2.8078 | 2.1822  |
| H | -2.9732 | -3.3222 | 1.2632  | H | 2.0837  | -3.6833 | -0.3123 |
| H | -1.3792 | -3.7048 | 0.6287  | H | 0.3474  | -3.4996 | -0.1079 |
| H | -4.8493 | -2.6038 | -0.6191 | H | 3.6063  | -3.0059 | 1.8783  |
| H | -4.3246 | -2.6492 | -2.2902 | H | 2.724   | -2.5221 | 3.3126  |
| H | -2.4011 | 1.078   | 1.4644  | H | 2.8662  | 0.55    | -1.3941 |
| H | -1.825  | 1.1301  | -0.191  | H | 2.0272  | 1.1591  | 0.0197  |
| H | -4.6683 | 1.5474  | 0.8557  | H | 5.0318  | 0.5928  | -0.2571 |
| H | -5.4889 | 2.0122  | -1.3552 | H | 5.3771  | 1.375   | 1.9956  |
| H | -3.913  | 1.8064  | -2.0835 | H | 3.6711  | 1.7048  | 2.2315  |
| H | -5.2201 | -0.2072 | -2.4433 | H | 4.2392  | -0.398  | 3.3027  |
| H | -5.6398 | -0.3199 | -0.7483 | H | 4.9858  | -1.014  | 1.8444  |
| H | -1.7156 | -1.3119 | -2.3311 | H | 0.6868  | -0.6319 | 2.3813  |
| H | -3.0458 | -0.7167 | -3.2971 | H | 1.8744  | -0.1592 | 3.5746  |
| H | -2.1478 | 0.3887  | -2.2625 | H | 1.6006  | 0.8497  | 2.1584  |
| H | 7.6059  | 0.4859  | -1.5202 | H | -7.2915 | 2.3209  | 0.8385  |
| H | 7.2612  | -0.1165 | 0.0932  | H | -6.3318 | 1.3789  | 1.9685  |
| H | 5.8856  | 2.1259  | -1.4343 | H | -6.9843 | 0.7669  | -0.9407 |
| H | 6.6989  | 2.1826  | 0.1303  | H | -7.3361 | -0.188  | 0.5005  |
| H | 5.4465  | -0.338  | -2.3524 | H | -5.3139 | 2.7986  | -0.5354 |
| H | 6.3963  | -1.6522 | -1.6816 | H | -5.0773 | 3.3634  | 1.1091  |
| H | 2.9613  | -0.7351 | 1.8104  | H | -2.3499 | -0.826  | 0.8402  |
| H | 2.308   | 0.8084  | 1.3441  | H | -2.9112 | -1.5551 | -0.6381 |
| H | 1.5071  | -0.0825 | -0.8021 | H | -2.166  | 0.3518  | -1.985  |
| H | 2.4287  | -2.8214 | 0.226   | H | -0.973  | 1.4871  | 0.6012  |
| H | 1.5643  | -2.5146 | -1.2706 | H | -0.7974 | 2.1527  | -1.0131 |
| H | 3.9861  | -2.7696 | -1.671  | H | -2.5638 | 3.3219  | 0.2644  |
| H | 3.3621  | -1.2113 | -2.1862 | H | -3.16   | 2.5828  | -1.2128 |
| H | 4.4131  | -2.4219 | 1.3026  | H | -2.4995 | 1.0057  | 2.2295  |
| H | 5.6861  | -2.9278 | 0.1981  | H | -3.3522 | 2.5172  | 2.5256  |
| H | 5.9452  | -1.5592 | 1.2879  | H | -4.197  | 0.9719  | 2.6857  |
| H | 3.1806  | 2.5546  | 1.2587  | H | -4.6885 | -2.3638 | -0.8276 |
| H | -3.7717 | -0.8661 | 2.0996  | H | 3.8043  | -1.6759 | -1.2876 |

|             |                  |                  |                  |             |                  |                  |                  |
|-------------|------------------|------------------|------------------|-------------|------------------|------------------|------------------|
| H           | -3.9445          | 5.11             | 1.2372           | H           | 4.3283           | 4.7119           | -0.1094          |
| H           | -4.946           | 3.6681           | 1.8046           | H           | 3.9378           | 3.7377           | 1.3971           |
| H           | 0.7042           | -0.8398          | 2.8589           | H           | -0.2013          | -0.7997          | -3.2948          |
| H           | -2.3864          | 4.9666           | -0.4755          | H           | 4.8564           | 3.7804           | -2.1419          |
| <b>1c-7</b> | <b>X axis(Å)</b> | <b>Y axis(Å)</b> | <b>Z axis(Å)</b> | <b>1c-8</b> | <b>X axis(Å)</b> | <b>Y axis(Å)</b> | <b>Z axis(Å)</b> |
| C           | 2.6305           | -2.5483          | 2.4786           | C           | 1.3285           | -3.0982          | 1.7841           |
| C           | 2.3774           | -2.9333          | 1.0212           | C           | 1.1311           | -3.0862          | 0.268            |
| C           | 1.8487           | -1.7644          | 0.1747           | C           | 1.2741           | -1.6823          | -0.3409          |
| C           | 2.7522           | -0.5033          | 0.307            | C           | 2.6101           | -1.007           | 0.0859           |
| C           | 2.9167           | -0.0777          | 1.8123           | C           | 2.7389           | -0.9468          | 1.6529           |
| C           | 3.4777           | -1.28            | 2.6198           | C           | 2.6119           | -2.386           | 2.2237           |
| C           | 2.2799           | 0.7004           | -0.5415          | C           | 2.8233           | 0.3994           | -0.5202          |
| C           | 3.2438           | 1.9079           | -0.4397          | C           | 4.1938           | 1.0088           | -0.1287          |
| C           | 3.5089           | 2.2931           | 1.0304           | C           | 4.4044           | 0.994            | 1.3961           |
| C           | 3.9319           | 1.0966           | 1.8887           | C           | 4.1387           | -0.381           | 2.0178           |
| C           | 1.6013           | 0.391            | 2.4909           | C           | 1.6785           | -0.0528          | 2.3505           |
| O           | 0.4746           | -1.4873          | 0.5305           | O           | 0.1202           | -0.883           | 0.0068           |
| C           | 2.7541           | 3.0578           | -1.3081          | C           | 4.4342           | 2.4056           | -0.6812          |
| C           | -6.3571          | 1.0304           | 0.0785           | C           | -6.4223          | 1.8872           | 0.8964           |
| C           | -5.4887          | 1.3015           | 1.3002           | C           | -6.6532          | 0.594            | 0.1258           |
| C           | -4.0243          | 0.9823           | 1.0998           | C           | -5.3998          | -0.2224          | -0.0925          |
| C           | -3.5487          | 0.2546           | 0.0586           | C           | -4.1451          | 0.2634           | 0.0777           |
| C           | -4.4998          | -0.3518          | -0.9947          | C           | -3.9054          | 1.7305           | 0.4964           |
| C           | -5.9856          | -0.3055          | -0.5427          | C           | -5.1881          | 2.5983           | 0.3675           |
| C           | -2.0773          | -0.0409          | -0.2042          | C           | -2.8632          | -0.541           | -0.1028          |
| C           | -1.7959          | -1.5455          | -0.3878          | C           | -1.8575          | 0.1526           | -1.04            |
| C           | -2.6752          | -2.1126          | -1.512           | C           | -1.5488          | 1.5744           | -0.5563          |
| C           | -4.1543          | -1.8464          | -1.235           | C           | -2.8327          | 2.388            | -0.4134          |
| C           | -4.3635          | 0.4388           | -2.3177          | C           | -3.4346          | 1.764            | 1.97             |
| C           | -3.153           | 1.5694           | 2.1679           | C           | -5.6921          | -1.6354          | -0.492           |
| O           | -3.6035          | 2.215            | 3.1087           | O           | -6.8233          | -2.0251          | -0.7621          |
| C           | -0.3146          | -1.7766          | -0.5821          | C           | -0.5882          | -0.6487          | -1.167           |
| C           | 1.7094           | -2.2114          | -1.2627          | C           | 1.1452           | -1.7678          | -1.8461          |
| O           | 4.0776           | -0.852           | -0.1656          | O           | 3.7004           | -1.836           | -0.3874          |
| C           | 2.1813           | 4.2006           | -0.8946          | C           | 3.5027           | 3.3026           | -1.0462          |
| O           | 2.6214           | -2.5061          | -2.0216          | O           | 1.9576           | -2.2637          | -2.6139          |
| C           | 0.3127           | -2.224           | -1.6681          | C           | -0.0826          | -1.1334          | -2.2985          |
| C           | 2.965            | 2.9312           | -2.7816          | C           | 5.8559           | 2.8241           | -0.8718          |
| O           | 3.4445           | 1.9322           | -3.3029          | O           | 6.8077           | 2.1059           | -0.5934          |
| H           | 3.1387           | -3.3772          | 2.9858           | H           | 1.3571           | -4.137           | 2.1341           |
| H           | 1.6729           | -2.4226          | 2.9955           | H           | 0.4588           | -2.6418          | 2.2695           |
| H           | 3.3123           | -3.3153          | 0.5911           | H           | 1.8587           | -3.7696          | -0.1884          |
| H           | 1.6646           | -3.7678          | 1.0042           | H           | 0.138            | -3.4979          | 0.0468           |
| H           | 4.5004           | -1.508           | 2.2924           | H           | 3.4704           | -2.9925          | 1.9071           |
| H           | 3.5536           | -1.0184          | 3.6829           | H           | 2.6488           | -2.362           | 3.3203           |
| H           | 2.2261           | 0.3959           | -1.5936          | H           | 2.7957           | 0.3388           | -1.6159          |
| H           | 1.265            | 1.0039           | -0.2594          | H           | 2.002            | 1.0582           | -0.2209          |

|             |                  |                  |                  |              |                  |                  |                  |
|-------------|------------------|------------------|------------------|--------------|------------------|------------------|------------------|
| H           | 4.2183           | 1.6007           | -0.8457          | H            | 4.9557           | 0.3542           | -0.5752          |
| H           | 4.2981           | 3.0545           | 1.0735           | H            | 5.4344           | 1.2858           | 1.6368           |
| H           | 2.6201           | 2.7489           | 1.4801           | H            | 3.763            | 1.746            | 1.8719           |
| H           | 4.0499           | 1.4281           | 2.9284           | H            | 4.2448           | -0.3052          | 3.1077           |
| H           | 4.9274           | 0.7651           | 1.567            | H            | 4.9261           | -1.072           | 1.69             |
| H           | 0.88             | -0.4156          | 2.636            | H            | 0.6662           | -0.4571          | 2.2908           |
| H           | 1.8098           | 0.7953           | 3.4891           | H            | 1.9038           | 0.0427           | 3.4198           |
| H           | 1.09             | 1.1765           | 1.9287           | H            | 1.6425           | 0.96             | 1.9411           |
| H           | -7.4128          | 1.0254           | 0.3735           | H            | -7.3001          | 2.5358           | 0.7949           |
| H           | -6.2422          | 1.8396           | -0.6517          | H            | -6.3147          | 1.6739           | 1.966            |
| H           | -5.8584          | 0.7048           | 2.1441           | H            | -7.0861          | 0.83             | -0.855           |
| H           | -5.6178          | 2.3564           | 1.5721           | H            | -7.4015          | 0.0089           | 0.6745           |
| H           | -6.1814          | -1.0923          | 0.1988           | H            | -5.3682          | 2.8544           | -0.6857          |
| H           | -6.6505          | -0.5143          | -1.3903          | H            | -5.0596          | 3.5521           | 0.8946           |
| H           | -1.7667          | 0.5081           | -1.1031          | H            | -3.0474          | -1.5407          | -0.5016          |
| H           | -1.4316          | 0.3348           | 0.5911           | H            | -2.4162          | -0.7004          | 0.8871           |
| H           | -2.0771          | -2.0631          | 0.541            | H            | -2.3223          | 0.2285           | -2.0339          |
| H           | -2.398           | -1.6804          | -2.4808          | H            | -1.0104          | 1.5555           | 0.3991           |
| H           | -2.5217          | -3.1958          | -1.5972          | H            | -0.8855          | 2.0772           | -1.2718          |
| H           | -4.749           | -2.2393          | -2.0698          | H            | -2.5809          | 3.3873           | -0.0355          |
| H           | -4.439           | -2.4362          | -0.3526          | H            | -3.2463          | 2.5372           | -1.4206          |
| H           | -3.3595          | 0.3691           | -2.7476          | H            | -2.4816          | 1.2467           | 2.1184           |
| H           | -5.0616          | 0.061            | -3.0737          | H            | -3.2955          | 2.7955           | 2.3138           |
| H           | -4.5736          | 1.5045           | -2.176           | H            | -4.1607          | 1.2875           | 2.6379           |
| H           | -2.0728          | 1.3998           | 2.0869           | H            | -4.8446          | -2.3303          | -0.5364          |
| H           | 4.0087           | -1.1657          | -1.0923          | H            | 3.5962           | -1.9787          | -1.3513          |
| H           | 1.8741           | 4.9825           | -1.5837          | H            | 3.7604           | 4.28             | -1.4449          |
| H           | 1.9932           | 4.4041           | 0.1543           | H            | 2.4413           | 3.101            | -0.9523          |
| H           | -0.0519          | -2.5116          | -2.6354          | H            | -0.4307          | -1.0723          | -3.3117          |
| H           | 2.653            | 3.7971           | -3.3899          | H            | 6.0087           | 3.8358           | -1.2843          |
| <b>1c-9</b> | <b>X axis(Å)</b> | <b>Y axis(Å)</b> | <b>Z axis(Å)</b> | <b>1c-10</b> | <b>X axis(Å)</b> | <b>Y axis(Å)</b> | <b>Z axis(Å)</b> |
| C           | 1.643            | -2.8836          | 2.0867           | C            | -2.753           | -3.5458          | -0.5512          |
| C           | 1.3883           | -3.0491          | 0.5884           | C            | -2.1806          | -2.9984          | 0.756            |
| C           | 1.4329           | -1.7156          | -0.1733          | C            | -1.7917          | -1.5137          | 0.666            |
| C           | 2.7487           | -0.9343          | 0.1171           | C            | -2.9625          | -0.645           | 0.1202           |
| C           | 2.9371           | -0.6961          | 1.6613           | C            | -3.4677          | -1.1791          | -1.27            |
| C           | 2.9039           | -2.0678          | 2.3898           | C            | -3.8733          | -2.671           | -1.1219          |
| C           | 2.8658           | 0.4005           | -0.6533          | C            | -2.636           | 0.8637           | 0.0293           |
| C           | 4.2011           | 1.1245           | -0.3658          | C            | -3.8491          | 1.7012           | -0.4444          |
| C           | 4.4889           | 1.2826           | 1.1367           | C            | -4.4346          | 1.1471           | -1.7597          |
| C           | 4.3216           | -0.0328          | 1.9039           | C            | -4.7171          | -0.3575          | -1.6941          |
| C           | 1.8608           | 0.2213           | 2.3008           | C            | -2.4227          | -1.0723          | -2.4126          |
| O           | 0.2554           | -0.9404          | 0.1383           | O            | -0.59            | -1.3719          | -0.1264          |
| C           | 4.3142           | 2.441            | -1.1103          | C            | -3.4921          | 3.1797           | -0.4921          |
| C           | -6.3826          | 1.646            | 0.8784           | C            | 6.8556           | 0.2692           | -0.8009          |
| C           | -6.5649          | 0.3267           | 0.136            | C            | 6.0711           | 1.5732           | -0.7389          |
| C           | -5.2806          | -0.434           | -0.0579          | C            | 4.7217           | 1.4468           | -0.0688          |

|   |         |         |         |   |         |         |         |
|---|---------|---------|---------|---|---------|---------|---------|
| C | -4.0497 | 0.0872  | 0.1497  | C | 4.1108  | 0.2607  | 0.1753  |
| C | -3.853  | 1.5696  | 0.5122  | C | 4.7549  | -1.0747 | -0.2559 |
| C | -5.165  | 2.3881  | 0.3442  | C | 5.9455  | -0.868  | -1.2331 |
| C | -2.7544 | -0.7052 | 0.0498  | C | 2.7706  | 0.0928  | 0.8811  |
| C | -1.7771 | -0.0599 | -0.9444 | C | 1.774   | -0.7553 | 0.0657  |
| C | -1.4979 | 1.4005  | -0.5543 | C | 2.387   | -2.1212 | -0.2699 |
| C | -2.7961 | 2.2014  | -0.435  | C | 3.7191  | -1.9596 | -0.9996 |
| C | -3.3856 | 1.6885  | 1.9813  | C | 5.2729  | -1.8165 | 0.9992  |
| C | -5.4935 | -1.8406 | -0.5087 | C | 4.1407  | 2.7725  | 0.3149  |
| O | -4.8513 | -2.3687 | -1.4075 | O | 4.6562  | 3.8382  | -0.006  |
| C | -0.4929 | -0.8416 | -1.0302 | C | 0.4272  | -0.9432 | 0.726   |
| C | 1.2532  | -1.97   | -1.6537 | C | -1.3219 | -1.0385 | 2.0219  |
| O | 3.8666  | -1.7556 | -0.3148 | O | -4.079  | -0.7755 | 1.0363  |
| C | 5.2553  | 2.677   | -2.0398 | C | -3.2661 | 3.9253  | -1.5866 |
| O | 2.0612  | -2.5184 | -2.3912 | O | -2.0102 | -0.9084 | 3.0238  |
| C | -0.0093 | -1.4251 | -2.1243 | C | 0.0965  | -0.7184 | 1.9962  |
| C | 3.3598  | 3.5502  | -0.8312 | C | -3.4206 | 3.9016  | 0.814   |
| O | 2.4384  | 3.4629  | -0.0295 | O | -3.5773 | 3.3439  | 1.893   |
| H | 1.7381  | -3.8747 | 2.5463  | H | -3.1408 | -4.5568 | -0.3776 |
| H | 0.7701  | -2.4172 | 2.5567  | H | -1.9476 | -3.6556 | -1.2856 |
| H | 2.1334  | -3.7424 | 0.1776  | H | -2.9215 | -3.1444 | 1.5527  |
| H | 0.4107  | -3.5304 | 0.4561  | H | -1.3074 | -3.6044 | 1.0301  |
| H | 3.7794  | -2.6653 | 2.1038  | H | -4.7498 | -2.7589 | -0.4668 |
| H | 2.9812  | -1.921  | 3.4746  | H | -4.1825 | -3.0765 | -2.0938 |
| H | 2.8269  | 0.2087  | -1.7337 | H | -2.3396 | 1.2253  | 1.0213  |
| H | 2.0097  | 1.042   | -0.4248 | H | -1.7766 | 1.0389  | -0.6284 |
| H | 4.995   | 0.4684  | -0.7532 | H | -4.6486 | 1.5955  | 0.3031  |
| H | 5.5163  | 1.6431  | 1.277   | H | -5.3698 | 1.6714  | -1.9945 |
| H | 3.8431  | 2.0458  | 1.5837  | H | -3.7576 | 1.3396  | -2.5991 |
| H | 4.4688  | 0.1583  | 2.9747  | H | -5.0775 | -0.6953 | -2.6743 |
| H | 5.1286  | -0.7165 | 1.6106  | H | -5.5459 | -0.5314 | -0.996  |
| H | 0.8702  | -0.236  | 2.3373  | H | -1.5731 | -1.7456 | -2.2837 |
| H | 2.1254  | 0.4542  | 3.3395  | H | -2.8791 | -1.3391 | -3.3737 |
| H | 1.753   | 1.1746  | 1.7771  | H | -2.0151 | -0.0641 | -2.5218 |
| H | -7.2804 | 2.2626  | 0.7549  | H | 7.6855  | 0.3744  | -1.5092 |
| H | -6.2763 | 1.4606  | 1.9535  | H | 7.3046  | 0.053   | 0.1753  |
| H | -7.001  | 0.5251  | -0.8515 | H | 5.9161  | 1.9504  | -1.758  |
| H | -7.2905 | -0.2825 | 0.6884  | H | 6.692   | 2.3102  | -0.2146 |
| H | -5.3411 | 2.6093  | -0.7176 | H | 5.5734  | -0.6413 | -2.2418 |
| H | -5.0771 | 3.36    | 0.8458  | H | 6.5302  | -1.7919 | -1.3255 |
| H | -2.3025 | -0.755  | 1.0491  | H | 2.9563  | -0.3718 | 1.8578  |
| H | -2.9165 | -1.7495 | -0.2295 | H | 2.2914  | 1.0492  | 1.0989  |
| H | -2.2525 | -0.0591 | -1.9361 | H | 1.5912  | -0.22   | -0.8779 |
| H | -0.9457 | 1.4524  | 0.3921  | H | 2.5256  | -2.7148 | 0.6421  |
| H | -0.8561 | 1.8721  | -1.3095 | H | 1.7055  | -2.6962 | -0.91   |
| H | -2.558  | 3.221   | -0.1056 | H | 4.1432  | -2.9539 | -1.1906 |
| H | -3.2191 | 2.2971  | -1.4448 | H | 3.5055  | -1.5243 | -1.9858 |

|              |                  |                  |                  |              |                  |                  |                  |
|--------------|------------------|------------------|------------------|--------------|------------------|------------------|------------------|
| H            | -2.4112          | 1.2204           | 2.1523           | H            | 4.4678           | -2.0857          | 1.69             |
| H            | -3.2894          | 2.7394           | 2.2778           | H            | 5.7809           | -2.7477          | 0.7228           |
| H            | -4.0931          | 1.2133           | 2.6696           | H            | 5.9853           | -1.206           | 1.5648           |
| H            | -6.3175          | -2.3689          | -1.00E-04        | H            | 3.2166           | 2.7643           | 0.9052           |
| H            | 3.6995           | -2.0479          | -1.2356          | H            | -3.7895          | -0.4846          | 1.9272           |
| H            | 5.3347           | 3.6201           | -2.572           | H            | -3.0302          | 4.9846           | -1.533           |
| H            | 5.9874           | 1.9163           | -2.298           | H            | -3.3041          | 3.5064           | -2.5865          |
| H            | -0.3952          | -1.4742          | -3.1241          | H            | 0.6707           | -0.3763          | 2.8354           |
| H            | 3.5264           | 4.4794           | -1.4022          | H            | -3.2078          | 4.9826           | 0.7569           |
| <b>1c-11</b> | <b>X axis(Å)</b> | <b>Y axis(Å)</b> | <b>Z axis(Å)</b> | <b>1c-12</b> | <b>X axis(Å)</b> | <b>Y axis(Å)</b> | <b>Z axis(Å)</b> |
| C            | 2.3436           | -2.8025          | 2.3604           | C            | -2.7479          | -3.3475          | -1.0651          |
| C            | 2.0544           | -3.1593          | 0.9021           | C            | -2.1787          | -3.0869          | 0.3296           |
| C            | 1.6325           | -1.9431          | 0.0629           | C            | -1.8013          | -1.614           | 0.5522           |
| C            | 2.6534           | -0.7749          | 0.1941           | C            | -2.9868          | -0.6624          | 0.2132           |
| C            | 2.8559           | -0.3661          | 1.7              | C            | -3.4913          | -0.8879          | -1.26            |
| C            | 3.3033           | -1.617           | 2.505            | C            | -3.8779          | -2.3821          | -1.4368          |
| C            | 2.2948           | 0.4695           | -0.6511          | C            | -2.6782          | 0.8321           | 0.457            |
| C            | 3.3695           | 1.5819           | -0.5483          | C            | -3.8928          | 1.7369           | 0.145            |
| C            | 3.6744           | 1.9413           | 0.9171           | C            | -4.4953          | 1.4766           | -1.246           |
| C            | 3.9727           | 0.7107           | 1.7798           | C            | -4.7523          | -0.0119          | -1.5011          |
| C            | 1.591            | 0.2227           | 2.3809           | C            | -2.4514          | -0.5213          | -2.3519          |
| O            | 0.2914           | -1.543           | 0.4257           | O            | -0.6067          | -1.3016          | -0.1976          |
| C            | 3.0424           | 2.8381           | -1.3413          | C            | -3.5914          | 3.2064           | 0.3688           |
| C            | -6.3721          | 1.3973           | 0.1022           | C            | 6.0806           | 0.5121           | -1.6787          |
| C            | -5.4779          | 1.5866           | 1.3206           | C            | 5.8504           | 1.6346           | -0.6746          |
| C            | -4.0395          | 1.1746           | 1.1006           | C            | 4.6411           | 1.3942           | 0.1973           |
| C            | -3.622           | 0.4369           | 0.0415           | C            | 4.0951           | 0.167            | 0.3794           |
| C            | -4.6208          | -0.0869          | -1.0119          | C            | 4.7395           | -1.1046          | -0.2142          |
| C            | -6.0965          | 0.0508           | -0.5454          | C            | 6.074            | -0.826           | -0.9614          |
| C            | -2.1758          | 0.0502           | -0.2414          | C            | 2.7752           | -0.1119          | 1.0832           |
| C            | -1.9952          | -1.4665          | -0.4522          | C            | 1.7588           | -0.738           | 0.102            |
| C            | -2.9225          | -1.9568          | -1.5741          | C            | 2.3405           | -1.9882          | -0.5822          |
| C            | -4.3778          | -1.5971          | -1.2778          | C            | 3.7185           | -1.7258          | -1.2017          |
| C            | -4.4433          | 0.7138           | -2.3238          | C            | 5.0859           | -2.1253          | 0.898            |
| C            | -3.1235          | 1.6813           | 2.1724           | C            | 4.0832           | 2.6477           | 0.795            |
| O            | -3.524           | 2.3358           | 3.1294           | O            | 4.6004           | 3.7478           | 0.6316           |
| C            | -0.5346          | -1.7926          | -0.6696          | C            | 0.4173           | -1.0645          | 0.7185           |
| C            | 1.4452           | -2.3618          | -1.3773          | C            | -1.3255          | -1.4224          | 1.9734           |
| O            | 3.9375           | -1.2479          | -0.2824          | O            | -4.0979          | -0.9987          | 1.0868           |
| C            | 1.8235           | 3.2708           | -1.7053          | C            | -4.2324          | 3.9543           | 1.2826           |
| O            | 2.3296           | -2.6873          | -2.1567          | O            | -2.019           | -1.4768          | 2.9799           |
| C            | 0.0444           | -2.2892          | -1.7611          | C            | 0.0955           | -1.1157          | 2.0097           |
| C            | 4.1958           | 3.6734           | -1.794           | C            | -2.5456          | 3.8927           | -0.4401          |
| O            | 5.3621           | 3.3922           | -1.5489          | O            | -1.8609          | 3.3214           | -1.2791          |
| H            | 2.774            | -3.6758          | 2.865            | H            | -3.125           | -4.3761          | -1.1124          |
| H            | 1.4018           | -2.5904          | 2.8784           | H            | -1.9426          | -3.2886          | -1.8055          |
| H            | 2.9496           | -3.6231          | 0.4679           | H            | -2.9171          | -3.4033          | 1.0776           |



|              |                  |                  |                  |              |                  |                  |                  |
|--------------|------------------|------------------|------------------|--------------|------------------|------------------|------------------|
| H            | 1.2688           | -3.9255          | 0.884            | H            | -1.3007          | -3.7306          | 0.4693           |
| H            | 4.301            | -1.9372          | 2.1773           | H            | -4.7528          | -2.6187          | -0.8173          |
| H            | 3.4024           | -1.366           | 3.5688           | H            | -4.183           | -2.5729          | -2.4736          |
| H            | 2.2179           | 0.189            | -1.7096          | H            | -2.4194          | 0.9895           | 1.5124           |
| H            | 1.3111           | 0.8464           | -0.3536          | H            | -1.7998          | 1.1319           | -0.1217          |
| H            | 4.2859           | 1.159            | -0.9837          | H            | -4.6761          | 1.4574           | 0.8655           |
| H            | 4.5402           | 2.6135           | 0.9671           | H            | -5.4453          | 2.0185           | -1.341           |
| H            | 2.8365           | 2.5022           | 1.3493           | H            | -3.8479          | 1.872            | -2.036           |
| H            | 4.1165           | 1.0315           | 2.8196           | H            | -5.1126          | -0.1398          | -2.53            |
| H            | 4.9344           | 0.2861           | 1.4642           | H            | -5.5755          | -0.3427          | -0.8548          |
| H            | 0.795            | -0.5111          | 2.5204           | H            | -1.5947          | -1.1975          | -2.3757          |
| H            | 1.8362           | 0.5978           | 3.3821           | H            | -2.9079          | -0.5749          | -3.3479          |
| H            | 1.1603           | 1.0592           | 1.8245           | H            | -2.0561          | 0.4909           | -2.2357          |
| H            | -7.4234          | 1.4582           | 0.4065           | H            | 5.308            | 0.5335           | -2.4565          |
| H            | -6.2082          | 2.2099           | -0.6147          | H            | 7.0426           | 0.6613           | -2.1824          |
| H            | -5.8798          | 0.9998           | 2.1567           | H            | 5.7397           | 2.565            | -1.2445          |
| H            | -5.5342          | 2.6424           | 1.6129           | H            | 6.7324           | 1.7512           | -0.0325          |
| H            | -6.3388          | -0.7342          | 0.1842           | H            | 6.2862           | -1.6289          | -1.6786          |
| H            | -6.7808          | -0.0977          | -1.3903          | H            | 6.9118           | -0.8286          | -0.25            |
| H            | -1.4996          | 0.3704           | 0.5528           | H            | 2.9559           | -0.7725          | 1.939            |
| H            | -1.8383          | 0.5924           | -1.1347          | H            | 2.3258           | 0.787            | 1.5095           |
| H            | -2.2986          | -1.9794          | 0.4723           | H            | 1.5699           | 0.012            | -0.6809          |
| H            | -2.6267          | -1.5297          | -2.5397          | H            | 2.4075           | -2.8157          | 0.1349           |
| H            | -2.8429          | -3.0465          | -1.6765          | H            | 1.6631           | -2.3307          | -1.3752          |
| H            | -5.0052          | -1.9368          | -2.112           | H            | 4.1074           | -2.6708          | -1.6023          |
| H            | -4.6927          | -2.1803          | -0.4012          | H            | 3.5831           | -1.0599          | -2.0644          |
| H            | -3.4499          | 0.5846           | -2.7643          | H            | 4.2097           | -2.495           | 1.4374           |
| H            | -5.1714          | 0.3954           | -3.0789          | H            | 5.5907           | -3.0027          | 0.4761           |
| H            | -4.5809          | 1.7888           | -2.1636          | H            | 5.758            | -1.681           | 1.642            |
| H            | -2.0575          | 1.4421           | 2.0791           | H            | 3.1848           | 2.5501           | 1.4164           |
| H            | 3.8286           | -1.6087          | -1.187           | H            | -3.7763          | -1.0027          | 2.0127           |
| H            | 1.6772           | 4.1792           | -2.2836          | H            | -4.0151          | 5.0066           | 1.44             |
| H            | 0.9184           | 2.7409           | -1.4303          | H            | -5.0094          | 3.5251           | 1.9097           |
| H            | -0.3549          | -2.5615          | -2.719           | H            | 0.6766           | -0.9574          | 2.8974           |
| H            | 3.9383           | 4.5764           | -2.373           | H            | -2.4108          | 4.9685           | -0.2356          |
| <b>1c-13</b> | <b>X axis(Å)</b> | <b>Y axis(Å)</b> | <b>Z axis(Å)</b> | <b>1c-14</b> | <b>X axis(Å)</b> | <b>Y axis(Å)</b> | <b>Z axis(Å)</b> |
| C            | 1.5791           | -3.2105          | 1.6696           | C            | 1.5314           | -3.0214          | 1.8506           |
| C            | 1.3663           | -3.0821          | 0.1614           | C            | 1.3322           | -3.0763          | 0.3358           |
| C            | 1.414            | -1.6259          | -0.3287          | C            | 1.4223           | -1.6928          | -0.326           |
| C            | 2.7052           | -0.9007          | 0.1506           | C            | 2.7356           | -0.9541          | 0.0682           |
| C            | 2.8473           | -0.9698          | 1.7158           | C            | 2.8669           | -0.8283          | 1.6314           |
| C            | 2.8191           | -2.4575          | 2.1613           | C            | 2.7893           | -2.2475          | 2.2585           |
| C            | 2.822            | 0.5628           | -0.3349          | C            | 2.8994           | 0.4297           | -0.6009          |
| C            | 4.1529           | 1.223            | 0.1012           | C            | 4.2319           | 1.1105           | -0.2124          |
| C            | 4.3736           | 1.0906           | 1.622            | C            | 4.461            | 1.1598           | 1.3075           |
| C            | 4.2144           | -0.35            | 2.1188           | C            | 4.2485           | -0.2036          | 1.973            |
| C            | 1.738            | -0.21            | 2.4922           | C            | 1.7774           | 0.0573           | 2.2934           |

|   |         |         |          |   |         |         |          |
|---|---------|---------|----------|---|---------|---------|----------|
| O | 0.2149  | -0.9341 | 0.0904   | O | 0.2436  | -0.924  | -0.0041  |
| C | 4.2381  | 2.6495  | -0.4216  | C | 4.3941  | 2.4732  | -0.8581  |
| C | -6.1306 | 2.069   | 0.0195   | C | -6.3651 | 1.7118  | 0.7861   |
| C | -6.5035 | 0.5973  | -0.1097  | C | -6.5628 | 0.4215  | 6.00E-04 |
| C | -5.2953 | -0.3056 | -0.1771  | C | -5.2943 | -0.3689 | -0.187   |
| C | -4.0632 | 0.0758  | 0.2387   | C | -4.0509 | 0.1359  | -0.0065  |
| C | -3.8253 | 1.4339  | 0.9338   | C | -3.8346 | 1.5978  | 0.4264   |
| C | -5.1316 | 2.2485  | 1.1491   | C | -5.1296 | 2.4474  | 0.2881   |
| C | -2.7785 | -0.7045 | 2.00E-04 | C | -2.7678 | -0.665  | -0.1904  |
| C | -1.7995 | 0.1193  | -0.8628  | C | -1.7429 | 0.0532  | -1.0871  |
| C | -1.5453 | 1.5154  | -0.27    | C | -1.4614 | 1.4744  | -0.5835  |
| C | -2.8514 | 2.2521  | 0.0463   | C | -2.7566 | 2.2736  | -0.4612  |
| C | -3.2147 | 1.2349  | 2.3433   | C | -3.3859 | 1.6211  | 1.9069   |
| C | -5.5819 | -1.6428 | -0.7839  | C | -5.5604 | -1.7929 | -0.5569  |
| O | -6.6766 | -1.9391 | -1.2503  | O | -4.9307 | -2.7482 | -0.1235  |
| C | -0.4993 | -0.6149 | -1.0599  | C | -0.4627 | -0.7348 | -1.1872  |
| C | 1.2758  | -1.6002 | -1.8356  | C | 1.2948  | -1.837  | -1.8264  |
| O | 3.8446  | -1.6127 | -0.3942  | O | 3.859   | -1.7595 | -0.3792  |
| C | 4.0897  | 3.7828  | 0.2844   | C | 5.3783  | 2.7579  | -1.7275  |
| O | 2.0894  | -2.0221 | -2.6446  | O | 2.1223  | -2.3412 | -2.5738  |
| C | 0.0262  | -0.9694 | -2.2299  | C | 0.0562  | -1.2429 | -2.3024  |
| C | 4.5614  | 2.821   | -1.87    | C | 3.4432  | 3.5758  | -0.5436  |
| O | 4.6996  | 1.8775  | -2.6383  | O | 2.4827  | 3.4469  | 0.2047   |
| H | 1.6776  | -4.2714 | 1.9292   | H | 1.5972  | -4.0439 | 2.2413   |
| H | 0.687   | -2.8544 | 2.1965   | H | 0.6467  | -2.5771 | 2.3198   |
| H | 2.1313  | -3.677  | -0.3541  | H | 2.0841  | -3.7496 | -0.0957  |
| H | 0.3991  | -3.5362 | -0.0898  | H | 0.3547  | -3.5324 | 0.133    |
| H | 3.711   | -2.978  | 1.789    | H | 3.6681  | -2.8358 | 1.9639   |
| H | 2.8666  | -2.5248 | 3.2557   | H | 2.8262  | -2.1789 | 3.3532   |
| H | 2.7769  | 0.5805  | -1.4305  | H | 2.9     | 0.315   | -1.6929  |
| H | 1.9722  | 1.1603  | 0.0152   | H | 2.0433  | 1.0666  | -0.3599  |
| H | 4.9782  | 0.6671  | -0.3668  | H | 5.0317  | 0.4697  | -0.613   |
| H | 5.3809  | 1.4428  | 1.8786   | H | 5.4858  | 1.4953  | 1.5131   |
| H | 3.6766  | 1.7303  | 2.1742   | H | 3.8059  | 1.8992  | 1.7808   |
| H | 4.3303  | -0.3653 | 3.2102   | H | 4.356   | -0.0903 | 3.0594   |
| H | 5.0411  | -0.9538 | 1.7231   | H | 5.0582  | -0.8767 | 1.6629   |
| H | 0.7551  | -0.6777 | 2.4084   | H | 0.781   | -0.3876 | 2.261    |
| H | 1.9714  | -0.1841 | 3.5637   | H | 2.0049  | 0.2133  | 3.3551   |
| H | 1.6253  | 0.8267  | 2.1648   | H | 1.7006  | 1.0462  | 1.8344   |
| H | -5.712  | 2.4388  | -0.9241  | H | -7.2501 | 2.3488  | 0.6729   |
| H | -7.0317 | 2.6599  | 0.22     | H | -6.2748 | 1.4909  | 1.8558   |
| H | -7.1176 | 0.4935  | -1.0122  | H | -6.9718 | 0.6587  | -0.9899  |
| H | -7.1251 | 0.2924  | 0.7414   | H | -7.3156 | -0.1852 | 0.5189   |
| H | -4.9024 | 3.3146  | 1.2716   | H | -5.2953 | 2.7148  | -0.7647  |
| H | -5.6212 | 1.9365  | 2.0823   | H | -5.0241 | 3.3959  | 0.8296   |
| H | -2.3305 | -0.9717 | 0.9645   | H | -2.34   | -0.8635 | 0.8006   |
| H | -2.9483 | -1.657  | -0.5066  | H | -2.9547 | -1.6439 | -0.6399  |

|              |                  |                  |                  |              |                  |                  |                  |
|--------------|------------------|------------------|------------------|--------------|------------------|------------------|------------------|
| H            | -2.2692          | 0.2632           | -1.8472          | H            | -2.1799          | 0.1363           | -2.093           |
| H            | -0.9344          | 1.4458           | 0.6384           | H            | -0.9436          | 1.4535           | 0.3831           |
| H            | -0.9616          | 2.1171           | -0.9788          | H            | -0.7882          | 1.9906           | -1.28            |
| H            | -2.6069          | 3.2051           | 0.5326           | H            | -2.5232          | 3.2736           | -0.0734          |
| H            | -3.3387          | 2.5083           | -0.9038          | H            | -3.1544          | 2.4233           | -1.4745          |
| H            | -2.2324          | 0.7547           | 2.3279           | H            | -2.4368          | 1.0993           | 2.0659           |
| H            | -3.0887          | 2.1986           | 2.8512           | H            | -3.2498          | 2.6502           | 2.259            |
| H            | -3.8663          | 0.6124           | 2.9682           | H            | -4.1229          | 1.1423           | 2.5609           |
| H            | -4.7667          | -2.3773          | -0.7813          | H            | -6.4174          | -1.9338          | -1.2376          |
| H            | 3.7698           | -1.623           | -1.3721          | H            | 3.7229           | -1.9855          | -1.3233          |
| H            | 4.1828           | 4.7673           | -0.1658          | H            | 5.4934           | 3.7342           | -2.1885          |
| H            | 3.866            | 3.7745           | 1.3458           | H            | 6.1114           | 2.0053           | -2.0059          |
| H            | -0.3226          | -0.8267          | -3.2346          | H            | -0.2899          | -1.2157          | -3.3172          |
| H            | 4.6644           | 3.8617           | -2.2215          | H            | 3.6501           | 4.5408           | -1.0367          |
| <b>1c-15</b> | <b>X axis(Å)</b> | <b>Y axis(Å)</b> | <b>Z axis(Å)</b> | <b>1c-16</b> | <b>X axis(Å)</b> | <b>Y axis(Å)</b> | <b>Z axis(Å)</b> |
| C            | -3.6878          | -2.6959          | -1.5329          | C            | 1.4184           | -3.1241          | 1.7817           |
| C            | -3.0618          | -2.9067          | -0.1543          | C            | 1.1706           | -3.1076          | 0.2731           |
| C            | -2.1596          | -1.7442          | 0.2802           | C            | 1.2669           | -1.698           | -0.3316          |
| C            | -2.8831          | -0.3667          | 0.1523           | C            | 2.6036           | -1.0001          | 0.0545           |
| C            | -3.4246          | -0.1442          | -1.308           | C            | 2.7832           | -0.9458          | 1.6168           |
| C            | -4.3596          | -1.3266          | -1.681           | C            | 2.7021           | -2.3901          | 2.1828           |
| C            | -2.0104          | 0.8322           | 0.5861           | C            | 2.7705           | 0.4132           | -0.5499          |
| C            | -2.7423          | 2.1856           | 0.4622           | C            | 4.1417           | 1.0462           | -0.2004          |
| C            | -3.417           | 2.3932           | -0.904           | C            | 4.4028           | 1.0273           | 1.3166           |
| C            | -4.2411          | 1.1782           | -1.3439          | C            | 4.1837           | -0.3558          | 1.9385           |
| C            | -2.3178          | -0.0402          | -2.3914          | C            | 1.7301           | -0.0756          | 2.3545           |
| O            | -0.9229          | -1.7686          | -0.4655          | O            | 0.111            | -0.9224          | 0.0598           |
| C            | -1.8315          | 3.3382           | 0.8427           | C            | 4.3375           | 2.4502           | -0.7523          |
| C            | 6.2262           | 0.5989           | -0.7443          | C            | -6.1741          | 2.2027           | -0.061           |
| C            | 5.1509           | 1.6634           | -0.9359          | C            | -6.5802          | 0.7341           | -0.0469          |
| C            | 3.8323           | 1.2893           | -0.3199          | C            | -5.3932          | -0.1985          | -0.0726          |
| C            | 3.4927           | 0.0349           | 0.0548           | C            | -4.1399          | 0.1901           | 0.2661           |
| C            | 4.4627           | -1.1474          | -0.1044          | C            | -3.8509          | 1.5986           | 0.8288           |
| C            | 5.6619           | -0.7881          | -1.0277          | C            | -5.1328          | 2.4581           | 1.0145           |
| C            | 2.1435           | -0.3218          | 0.6536           | C            | -2.8803          | -0.6372          | 0.0543           |
| C            | 1.4832           | -1.499           | -0.0889          | C            | -1.9175          | 0.0849           | -0.912           |
| C            | 2.4025           | -2.7226          | -0.0927          | C            | -1.6145          | 1.5217           | -0.4546          |
| C            | 3.7462           | -2.3727          | -0.7377          | C            | -2.8936          | 2.313            | -0.1605          |
| C            | 5.0087           | -1.5326          | 1.2905           | C            | -3.1944          | 1.5113           | 2.2289           |
| C            | 2.9224           | 2.4543           | -0.1138          | C            | -5.7266          | -1.5778          | -0.5463          |
| O            | 2.4182           | 2.7283           | 0.9694           | O            | -6.8381          | -1.8865          | -0.962           |
| C            | 0.1147           | -1.8045          | 0.4624           | C            | -0.6399          | -0.6931          | -1.0883          |
| C            | -1.6669          | -1.9785          | 1.6914           | C            | 1.089            | -1.7773          | -1.8322          |
| O            | -4.0409          | -0.3746          | 1.0274           | O            | 3.6928           | -1.806           | -0.4596          |
| C            | -2.0662          | 4.1384           | 1.8962           | C            | 3.378            | 3.3311           | -1.0818          |
| O            | -2.3644          | -2.0646          | 2.6928           | O            | 1.8838           | -2.2542          | -2.6298          |
| C            | -0.2134          | -1.9943          | 1.739            | C            | -0.1644          | -1.1621          | -2.2392          |

|              |                  |                  |                  |              |                  |                  |                  |
|--------------|------------------|------------------|------------------|--------------|------------------|------------------|------------------|
| C            | -0.5946          | 3.6179           | 0.0558           | C            | 5.7442           | 2.8966           | -0.9865          |
| O            | -0.291           | 3.0143           | -0.9671          | O            | 6.7179           | 2.1953           | -0.7431          |
| H            | -4.432           | -3.4811          | -1.7126          | H            | 1.478            | -4.1641          | 2.1243           |
| H            | -2.9224          | -2.8267          | -2.3057          | H            | 0.5569           | -2.6869          | 2.2983           |
| H            | -3.8677          | -3.0493          | 0.5771           | H            | 1.8952           | -3.7747          | -0.2114          |
| H            | -2.4899          | -3.8432          | -0.1733          | H            | 0.1785           | -3.5368          | 0.0823           |
| H            | -5.2569          | -1.3097          | -1.0488          | H            | 3.5608           | -2.9787          | 1.8344           |
| H            | -4.7162          | -1.2147          | -2.7129          | H            | 2.7748           | -2.3714          | 3.2778           |
| H            | -1.0795          | 0.8432           | 0.0121           | H            | 2.7077           | 0.358            | -1.6444          |
| H            | -1.7228          | 0.7161           | 1.6395           | H            | 1.9475           | 1.055            | -0.2197          |
| H            | -3.561           | 2.159            | 1.197            | H            | 4.9004           | 0.4084           | -0.6756          |
| H            | -4.0782          | 3.2681           | -0.8546          | H            | 5.4346           | 1.3372           | 1.5249           |
| H            | -2.6796          | 2.6257           | -1.6792          | H            | 3.7635           | 1.7645           | 1.8177           |
| H            | -4.6271          | 1.3581           | -2.3556          | H            | 4.3245           | -0.2838          | 3.0247           |
| H            | -5.1252          | 1.0988           | -0.6985          | H            | 4.9724           | -1.0301          | 1.5807           |
| H            | -1.7882          | -0.9799          | -2.559           | H            | 0.7242           | -0.4988          | 2.3265           |
| H            | -2.7547          | 0.2393           | -3.3579          | H            | 1.9894           | 0.0188           | 3.4162           |
| H            | -1.5618          | 0.7119           | -2.1531          | H            | 1.6614           | 0.9384           | 1.9523           |
| H            | 7.0672           | 0.8037           | -1.4168          | H            | -5.7817          | 2.4786           | -1.047           |
| H            | 6.624            | 0.6474           | 0.2759           | H            | -7.0558          | 2.8292           | 0.1162           |
| H            | 4.9963           | 1.8354           | -2.0086          | H            | -7.2267          | 0.5652           | -0.9164          |
| H            | 5.5161           | 2.6063           | -0.5109          | H            | -7.1784          | 0.5197           | 0.8475           |
| H            | 5.3486           | -0.8168          | -2.0804          | H            | -4.8786          | 3.5254           | 1.0345           |
| H            | 6.4587           | -1.5357          | -0.9266          | H            | -5.5952          | 2.2403           | 1.9875           |
| H            | 2.2877           | -0.5623          | 1.7144           | H            | -2.4028          | -0.8285          | 1.0225           |
| H            | 1.4469           | 0.5218           | 0.6256           | H            | -3.0871          | -1.6265          | -0.3601          |
| H            | 1.3468           | -1.1831          | -1.1344          | H            | -2.42            | 0.1523           | -1.8884          |
| H            | 2.5586           | -3.0965          | 0.9262           | H            | -0.9728          | 1.5184           | 0.435            |
| H            | 1.9382           | -3.5408          | -0.6573          | H            | -1.0449          | 2.0451           | -1.2335          |
| H            | 4.4011           | -3.2526          | -0.6991          | H            | -2.6129          | 3.2993           | 0.2306           |
| H            | 3.5607           | -2.1776          | -1.8031          | H            | -3.4095          | 2.4956           | -1.1124          |
| H            | 4.2189           | -1.8731          | 1.9678           | H            | -2.2229          | 1.0094           | 2.2231           |
| H            | 5.74             | -2.3457          | 1.2147           | H            | -3.0315          | 2.513            | 2.6444           |
| H            | 5.5043           | -0.687           | 1.7799           | H            | -3.8353          | 0.9614           | 2.9286           |
| H            | 2.7784           | 3.0896           | -1.0041          | H            | -4.9298          | -2.3303          | -0.4912          |
| H            | -3.7633          | -0.6767          | 1.9168           | H            | 3.5592           | -1.9454          | -1.4204          |
| H            | -1.4049          | 4.9545           | 2.1721           | H            | 3.6041           | 4.3153           | -1.4831          |
| H            | -2.9406          | 3.9932           | 2.5245           | H            | 2.3242           | 3.109            | -0.9548          |
| H            | 0.3891           | -2.0203          | 2.6265           | H            | -0.5472          | -1.101           | -3.2397          |
| H            | 0.0478           | 4.4252           | 0.4474           | H            | 5.8643           | 3.913            | -1.3982          |
| <b>1c-17</b> | <b>X axis(Å)</b> | <b>Y axis(Å)</b> | <b>Z axis(Å)</b> | <b>1c-18</b> | <b>X axis(Å)</b> | <b>Y axis(Å)</b> | <b>Z axis(Å)</b> |
| C            | -2.4317          | -3.6158          | -0.6584          | C            | 2.4383           | -3.1422          | 1.7754           |
| C            | -1.865           | -3.1148          | 0.6701           | C            | 2.2              | -3.1345          | 0.2657           |
| C            | -1.5934          | -1.6016          | 0.6709           | C            | 1.7562           | -1.7619          | -0.2648          |
| C            | -2.8467          | -0.7954          | 0.221            | C            | 2.7235           | -0.6295          | 0.189            |
| C            | -3.3492          | -1.2694          | -1.1925          | C            | 2.8745           | -0.6048          | 1.7545           |
| C            | -3.6326          | -2.7958          | -1.1404          | C            | 3.3495           | -2.0018          | 2.2393           |

|   |         |         |         |   |         |         |         |
|---|---------|---------|---------|---|---------|---------|---------|
| C | -2.6422 | 0.7371  | 0.2272  | C | 2.3382  | 0.774   | -0.3343 |
| C | -3.9331 | 1.5052  | -0.1561 | C | 3.3641  | 1.8584  | 0.0768  |
| C | -4.5177 | 1.0012  | -1.488  | C | 3.6138  | 1.8472  | 1.5991  |
| C | -4.669  | -0.5229 | -1.5303 | C | 3.9499  | 0.4513  | 2.1336  |
| C | -2.3516 | -1.0006 | -2.3507 | C | 1.5705  | -0.2446 | 2.5163  |
| O | -0.4312 | -1.315  | -0.1404 | O | 0.391   | -1.5027 | 0.1357  |
| C | -3.7711 | 3.0173  | -0.1904 | C | 2.96    | 3.2159  | -0.48   |
| C | 6.956   | 0.5615  | -0.8569 | C | -6.3573 | 0.0111  | 0.488   |
| C | 6.1544  | 1.8374  | -0.6355 | C | -5.5542 | 0.7053  | 1.581   |
| C | 4.8285  | 1.6171  | 0.0568  | C | -4.0674 | 0.67    | 1.3194  |
| C | 4.2422  | 0.4014  | 0.1917  | C | -3.5399 | 0.4542  | 0.0895  |
| C | 4.8935  | -0.8699 | -0.3947 | C | -4.4295 | 0.3338  | -1.1661 |
| C | 6.0502  | -0.5409 | -1.379  | C | -5.9411 | 0.5448  | -0.8713 |
| C | 2.9257  | 0.1373  | 0.9126  | C | -2.0665 | 0.208   | -0.1994 |
| C | 1.9183  | -0.6416 | 0.0429  | C | -1.8582 | -1.2053 | -0.7887 |
| C | 2.5434  | -1.9539 | -0.4487 | C | -2.7437 | -1.4206 | -2.0305 |
| C | 3.8496  | -1.6925 | -1.196  | C | -4.2151 | -1.0852 | -1.755  |
| C | 5.4611  | -1.7274 | 0.7613  | C | -4.0524 | 1.4062  | -2.2181 |
| C | 4.2413  | 2.884   | 0.5971  | C | -3.2421 | 0.8458  | 2.5559  |
| O | 4.7266  | 3.9875  | 0.3718  | O | -3.7374 | 1.0185  | 3.6646  |
| C | 0.5951  | -0.9225 | 0.7187  | C | -0.3865 | -1.4608 | -1.0212 |
| C | -1.1167 | -1.1765 | 2.0407  | C | 1.6275  | -1.8255 | -1.7697 |
| O | -3.9177 | -1.0784 | 1.1558  | O | 4.039   | -0.9259 | -0.3431 |
| C | -2.6336 | 3.7044  | -0.3878 | C | 2.4423  | 4.2514  | 0.2016  |
| O | -1.7958 | -1.1099 | 3.0555  | O | 2.5404  | -1.9719 | -2.5694 |
| C | 0.29    | -0.8084 | 2.0098  | C | 0.242   | -1.6574 | -2.1786 |
| C | -4.9977 | 3.8364  | 0.0486  | C | 3.1988  | 3.449   | -1.9362 |
| O | -6.1005 | 3.3453  | 0.2535  | O | 3.6348  | 2.5852  | -2.6868 |
| H | -2.7345 | -4.6638 | -0.547  | H | 2.8883  | -4.1001 | 2.0629  |
| H | -1.642  | -3.6106 | -1.4178 | H | 1.4767  | -3.094  | 2.2979  |
| H | -2.5688 | -3.3703 | 1.4729  | H | 3.1229  | -3.4507 | -0.2375 |
| H | -0.9409 | -3.6683 | 0.8807  | H | 1.4437  | -3.8949 | 0.0324  |
| H | -4.4804 | -2.9978 | -0.4729 | H | 4.366   | -2.2002 | 1.8751  |
| H | -3.937  | -3.1576 | -2.1309 | H | 3.4137  | -2.0196 | 3.3347  |
| H | -2.3532 | 1.0686  | 1.2329  | H | 2.293   | 0.7462  | -1.4296 |
| H | -1.8157 | 1.0015  | -0.4401 | H | 1.3349  | 1.0566  | 0.0053  |
| H | -4.6647 | 1.2807  | 0.633   | H | 4.33    | 1.6052  | -0.3836 |
| H | -5.5048 | 1.4489  | -1.6588 | H | 4.4421  | 2.5258  | 1.84    |
| H | -3.8908 | 1.3345  | -2.3243 | H | 2.7404  | 2.2276  | 2.1399  |
| H | -5.0272 | -0.8174 | -2.5252 | H | 4.0604  | 0.5046  | 3.2243  |
| H | -5.4621 | -0.8159 | -0.8303 | H | 4.9335  | 0.1528  | 1.7488  |
| H | -1.4448 | -1.6051 | -2.2876 | H | 0.803   | -1.0179 | 2.4469  |
| H | -2.8125 | -1.2447 | -3.3158 | H | 1.7764  | -0.1161 | 3.5861  |
| H | -2.036  | 0.0444  | -2.4042 | H | 1.1165  | 0.6854  | 2.1647  |
| H | 7.7617  | 0.755   | -1.5745 | H | -6.2058 | -1.0738 | 0.5359  |
| H | 7.4385  | 0.2529  | 0.0775  | H | -7.4267 | 0.1898  | 0.6481  |
| H | 5.9621  | 2.3161  | -1.6044 | H | -5.7945 | 0.208   | 2.5283  |

|              |                  |                  |                  |              |                  |                  |                  |
|--------------|------------------|------------------|------------------|--------------|------------------|------------------|------------------|
| H            | 6.78             | 2.5268           | -0.0552          | H            | -5.8724          | 1.7511           | 1.6745           |
| H            | 5.6438           | -0.2173          | -2.3473          | H            | -6.5528          | 0.0774           | -1.6532          |
| H            | 6.6456           | -1.4394          | -1.5845          | H            | -6.1848          | 1.6162           | -0.8989          |
| H            | 3.1467           | -0.4208          | 1.8313           | H            | -1.6899          | 0.9739           | -0.888           |
| H            | 2.4383           | 1.0578           | 1.2393           | H            | -1.4446          | 0.3077           | 0.6919           |
| H            | 1.6977           | -0.0165          | -0.8351          | H            | -2.1865          | -1.9361          | -0.0344          |
| H            | 2.7194           | -2.6347          | 0.3932           | H            | -2.3861          | -0.8131          | -2.8703          |
| H            | 1.8527           | -2.4739          | -1.1248          | H            | -2.6764          | -2.4663          | -2.3567          |
| H            | 4.2833           | -2.6535          | -1.5014          | H            | -4.7797          | -1.195           | -2.6898          |
| H            | 3.5988           | -1.1618          | -2.1251          | H            | -4.6146          | -1.8397          | -1.0645          |
| H            | 4.6818           | -2.0808          | 1.4437           | H            | -3.03            | 1.308            | -2.5926          |
| H            | 5.9741           | -2.6159          | 0.3752           | H            | -4.7162          | 1.3458           | -3.0889          |
| H            | 6.1815           | -1.1657          | 1.366            | H            | -4.1449          | 2.4155           | -1.799           |
| H            | 3.3405           | 2.7959           | 1.2162           | H            | -2.1518          | 0.8339           | 2.4376           |
| H            | -3.6064          | -0.8819          | 2.0641           | H            | 3.9754           | -0.9934          | -1.3195          |
| H            | -2.6016          | 4.7907           | -0.387           | H            | 2.1958           | 5.1977           | -0.2723          |
| H            | -1.6863          | 3.2094           | -0.5709          | H            | 2.2411           | 4.1975           | 1.2662           |
| H            | 0.8746           | -0.513           | 2.8595           | H            | -0.1139          | -1.675           | -3.1906          |
| H            | -4.857           | 4.9305           | 0.0301           | H            | 2.9497           | 4.4563           | -2.3109          |
| <b>1c-19</b> | <b>X axis(Å)</b> | <b>Y axis(Å)</b> | <b>Z axis(Å)</b> | <b>1c-20</b> | <b>X axis(Å)</b> | <b>Y axis(Å)</b> | <b>Z axis(Å)</b> |
| C            | 1.4965           | -3.2309          | 1.708            | C            | 1.2568           | -3.2971          | 1.6326           |
| C            | 1.2904           | -3.1851          | 0.1941           | C            | 1.0684           | -3.1918          | 0.1193           |
| C            | 1.4147           | -1.7661          | -0.3817          | C            | 1.2463           | -1.7586          | -0.4057          |
| C            | 2.7451           | -1.0842          | 0.0536           | C            | 2.5944           | -1.1384          | 0.0663           |
| C            | 2.8875           | -1.0645          | 1.621            | C            | 2.7179           | -1.1762          | 1.6346           |
| C            | 2.7769           | -2.5188          | 2.1552           | C            | 2.5549           | -2.6437          | 2.117            |
| C            | 2.9339           | 0.3392           | -0.5184          | C            | 2.8402           | 0.297            | -0.452           |
| C            | 4.2858           | 0.9629           | -0.1008          | C            | 4.2243           | 0.844            | -0.0224          |
| C            | 4.5315           | 0.8993           | 1.4162           | C            | 4.4325           | 0.7339           | 1.4986           |
| C            | 4.2874           | -0.4992          | 1.9919           | C            | 4.1289           | -0.6673          | 2.0385           |
| C            | 1.8246           | -0.1969          | 2.347            | C            | 1.6751           | -0.3012          | 2.3808           |
| O            | 0.2554           | -0.9866          | -0.0106          | O            | 0.1086           | -0.9546          | -0.0214          |
| C            | 4.4374           | 2.371            | -0.6395          | C            | 4.5098           | 2.2605           | -0.489           |
| C            | -6.2792          | 1.7788           | 0.9522           | C            | -6.3561          | 1.9614           | 0.9669           |
| C            | -6.514           | 0.4993           | 0.1602           | C            | -6.6177          | 0.7184           | 0.1266           |
| C            | -5.262           | -0.3137          | -0.0783          | C            | -5.3867          | -0.1218          | -0.1264          |
| C            | -4.0062          | 0.1681           | 0.0958           | C            | -4.1199          | 0.3169           | 0.079            |
| C            | -3.7641          | 1.6275           | 0.5403           | C            | -3.8414          | 1.7518           | 0.578            |
| C            | -5.0466          | 2.4982           | 0.4312           | C            | -5.097           | 2.6628           | 0.486            |
| C            | -2.7253          | -0.6333          | -0.1038          | C            | -2.8602          | -0.514           | -0.135           |
| C            | -1.7224          | 0.0768           | -1.0315          | C            | -1.8262          | 0.199            | -1.0256          |
| C            | -1.4108          | 1.4889           | -0.5224          | C            | -1.4805          | 1.5827           | -0.4631          |
| C            | -2.6937          | 2.3008           | -0.3606          | C            | -2.7414          | 2.4252           | -0.2865          |
| C            | -3.2886          | 1.6339           | 2.0128           | C            | -3.3837          | 1.6922           | 2.055            |
| C            | -5.5567          | -1.7188          | -0.5032          | C            | -5.7163          | -1.5019          | -0.604           |
| O            | -6.6903          | -2.1061          | -0.7663          | O            | -6.8565          | -1.845           | -0.898           |
| C            | -0.4536          | -0.7224          | -1.1784          | C            | -0.5794          | -0.6313          | -1.1867          |

|             |                  |                  |                  |             |                  |                  |                  |
|-------------|------------------|------------------|------------------|-------------|------------------|------------------|------------------|
| C           | 1.282            | -1.8182          | -1.8876          | C           | 1.1301           | -1.7554          | -1.9138          |
| O           | 3.8484           | -1.8789          | -0.4502          | O           | 3.6758           | -1.9539          | -0.4538          |
| C           | 5.3956           | 2.7254           | -1.5113          | C           | 3.6078           | 3.2026           | -0.8108          |
| O           | 2.0981           | -2.2934          | -2.6647          | O           | 1.9407           | -2.229           | -2.6976          |
| C           | 0.0519           | -1.177           | -2.3226          | C           | -0.075           | -1.0631          | -2.3402          |
| C           | 3.477            | 3.4259           | -0.1987          | C           | 5.9554           | 2.6253           | -0.6337          |
| O           | 3.4454           | 4.5592           | -0.6626          | O           | 6.3492           | 3.7329           | -0.9788          |
| H           | 1.5358           | -4.2774          | 2.0334           | H           | 1.2584           | -4.355           | 1.9214           |
| H           | 0.6262           | -2.7931          | 2.2092           | H           | 0.396            | -2.8485          | 2.1406           |
| H           | 2.0231           | -3.8493          | -0.2822          | H           | 1.7833           | -3.8637          | -0.3729          |
| H           | 0.3006           | -3.6023          | -0.0317          | H           | 0.0676           | -3.5672          | -0.1302          |
| H           | 3.6379           | -3.1094          | 1.816            | H           | 3.3999           | -3.2502          | 1.7657           |
| H           | 2.8225           | -2.5227          | 3.2518           | H           | 2.5886           | -2.687           | 3.2131           |
| H           | 2.9188           | 0.3011           | -1.6157          | H           | 2.8137           | 0.3045           | -1.5493          |
| H           | 2.0984           | 0.9823           | -0.2219          | H           | 2.0352           | 0.9572           | -0.1134          |
| H           | 5.0718           | 0.3476           | -0.563           | H           | 4.9729           | 0.1991           | -0.5049          |
| H           | 5.567            | 1.1931           | 1.6319           | H           | 5.4705           | 0.9834           | 1.7535           |
| H           | 3.9015           | 1.6221           | 1.9465           | H           | 3.8112           | 1.4736           | 2.0183           |
| H           | 4.4042           | -0.4605          | 3.0826           | H           | 4.2303           | -0.6574          | 3.1314           |
| H           | 5.0775           | -1.1707          | 1.6322           | H           | 4.901            | -1.3577          | 1.675            |
| H           | 0.8154           | -0.6083          | 2.2836           | H           | 0.6531           | -0.6733          | 2.287            |
| H           | 2.0565           | -0.125           | 3.4168           | H           | 1.8931           | -0.2813          | 3.4558           |
| H           | 1.7775           | 0.8248           | 1.9615           | H           | 1.6698           | 0.7367           | 2.0382           |
| H           | -7.157           | 2.4296           | 0.8652           | H           | -7.2137          | 2.6402           | 0.8936           |
| H           | -6.1679          | 1.547            | 2.0176           | H           | -6.2645          | 1.6885           | 2.0243           |
| H           | -6.9513          | 0.7525           | -0.8142          | H           | -7.0351          | 1.0189           | -0.8431          |
| H           | -7.26            | -0.0951          | 0.7021           | H           | -7.3873          | 0.1272           | 0.638            |
| H           | -5.2303          | 2.7727           | -0.6168          | H           | -5.2599          | 2.9798           | -0.5533          |
| H           | -4.9155          | 3.4426           | 0.9742           | H           | -4.9455          | 3.583            | 1.0643           |
| H           | -2.2751          | -0.8107          | 0.8815           | H           | -2.4273          | -0.7393          | 0.8483           |
| H           | -2.9111          | -1.6257          | -0.5198          | H           | -3.0695          | -1.4851          | -0.5883          |
| H           | -2.1907          | 0.1715           | -2.0221          | H           | -2.2796          | 0.3422           | -2.0174          |
| H           | -0.8695          | 1.4518           | 0.4308           | H           | -0.7961          | 2.1035           | -1.1451          |
| H           | -0.7494          | 2.0045           | -1.2305          | H           | -0.9519          | 1.4961           | 0.494            |
| H           | -2.4399          | 3.2928           | 0.0349           | H           | -2.464           | 3.3948           | 0.147            |
| H           | -3.1103          | 2.4689           | -1.3635          | H           | -3.1409          | 2.6407           | -1.2873          |
| H           | -2.3353          | 1.1136           | 2.1486           | H           | -2.4475          | 1.1398           | 2.1826           |
| H           | -3.148           | 2.6589           | 2.375            | H           | -3.2181          | 2.6992           | 2.4551           |
| H           | -4.0127          | 1.1455           | 2.6741           | H           | -4.1295          | 1.202            | 2.6904           |
| H           | -4.7085          | -2.4106          | -0.5733          | H           | -4.8881          | -2.2165          | -0.6846          |
| H           | 3.7138           | -2.0363          | -1.4089          | H           | 3.5402           | -2.0814          | -1.4168          |
| H           | 5.4796           | 3.7432           | -1.8856          | H           | 3.9178           | 4.1899           | -1.1481          |
| H           | 6.125            | 2.0098           | -1.8769          | H           | 2.5393           | 3.0384           | -0.7442          |
| H           | -0.2965          | -1.0877          | -3.3337          | H           | -0.4096          | -0.9311          | -3.3513          |
| H           | 2.7696           | 3.1178           | 0.5879           | H           | 6.6659           | 1.8137           | -0.4033          |
| <b>1d-1</b> | <b>X axis(Å)</b> | <b>Y axis(Å)</b> | <b>Z axis(Å)</b> | <b>1d-2</b> | <b>X axis(Å)</b> | <b>Y axis(Å)</b> | <b>Z axis(Å)</b> |
| C           | 4.1763           | -2.7931          | -0.5817          | C           | 4.1097           | -2.8742          | -0.4578          |

|   |         |         |         |   |         |         |         |
|---|---------|---------|---------|---|---------|---------|---------|
| C | 2.6537  | -2.8408 | -0.4818 | C | 2.5845  | -2.8802 | -0.3948 |
| C | 2.0303  | -1.594  | 0.16    | C | 1.9783  | -1.6034 | 0.2025  |
| C | 2.6087  | -0.2743 | -0.4247 | C | 2.606   | -0.312  | -0.3955 |
| C | 4.1713  | -0.2232 | -0.4779 | C | 4.17    | -0.3034 | -0.4103 |
| C | 4.6937  | -1.491  | -1.2032 | C | 4.676   | -1.6002 | -1.0948 |
| C | 2.0288  | 1.0106  | 0.2084  | C | 2.0463  | 1.0014  | 0.1963  |
| C | 2.4746  | 2.2889  | -0.5428 | C | 2.5449  | 2.2519  | -0.5682 |
| C | 4.0108  | 2.3329  | -0.6931 | C | 4.0848  | 2.2507  | -0.6836 |
| C | 4.5908  | 1.0408  | -1.2844 | C | 4.643   | 0.9309  | -1.2329 |
| C | 4.8641  | -0.135  | 0.9041  | C | 4.8303  | -0.2032 | 0.9868  |
| O | 0.5989  | -1.6274 | -0.1856 | O | 0.5559  | -1.6084 | -0.1796 |
| C | 1.8636  | 3.5293  | 0.0937  | C | 1.9551  | 3.5209  | 0.0319  |
| C | -6.3372 | 0.0579  | -0.8323 | C | -6.3457 | -0.3491 | 0.132   |
| C | -5.7424 | 1.137   | 0.0634  | C | -5.7669 | 1.0601  | 0.1891  |
| C | -4.2475 | 1.024   | 0.2464  | C | -4.2587 | 1.0663  | 0.1779  |
| C | -3.5318 | -0.0876 | -0.0547 | C | -3.5182 | 0.009   | -0.2329 |
| C | -4.2123 | -1.3467 | -0.6305 | C | -4.1637 | -1.2377 | -0.8722 |
| C | -5.7579 | -1.3014 | -0.4753 | C | -5.7081 | -1.1218 | -1.0104 |
| C | -2.0241 | -0.2201 | 0.1169  | C | -2.0153 | -0.1219 | -0.0391 |
| C | -1.6196 | -1.4944 | 0.884   | C | -1.6819 | -1.3586 | 0.825   |
| C | -2.2092 | -2.743  | 0.2218  | C | -2.3162 | -2.6383 | 0.2612  |
| C | -3.7277 | -2.6231 | 0.1089  | C | -3.8189 | -2.4643 | 0.0121  |
| C | -3.8698 | -1.4545 | -2.1357 | C | -3.6238 | -1.4557 | -2.3074 |
| C | -3.6264 | 2.2841  | 0.7638  | C | -3.6525 | 2.3334  | 0.6924  |
| O | -4.2914 | 3.2031  | 1.2322  | O | -4.3105 | 3.205   | 1.2512  |
| C | -0.121  | -1.5994 | 1.0006  | C | -0.1925 | -1.5177 | 0.9857  |
| C | 1.952   | -1.6872 | 1.6723  | C | 1.8581  | -1.6581 | 1.7139  |
| O | 2.1564  | -0.2472 | -1.8142 | O | 2.1884  | -0.3026 | -1.796  |
| C | 2.5064  | 4.483   | 0.788   | C | 2.61    | 4.4705  | 0.7205  |
| O | 2.8765  | -1.8001 | 2.4616  | O | 2.7577  | -1.7864 | 2.5293  |
| C | 0.5713  | -1.6416 | 2.1337  | C | 0.4689  | -1.5489 | 2.1375  |
| C | 0.3971  | 3.746   | -0.1019 | C | 0.499   | 3.7739  | -0.196  |
| O | -0.3303 | 2.9356  | -0.6647 | O | -0.24   | 2.9755  | -0.7607 |
| H | 4.6137  | -2.9439 | 0.4106  | H | 4.5188  | -3.0137 | 0.5482  |
| H | 4.52    | -3.6383 | -1.1904 | H | 4.4457  | -3.7414 | -1.039  |
| H | 2.2415  | -2.9728 | -1.4916 | H | 2.1939  | -3.0251 | -1.4114 |
| H | 2.3566  | -3.7427 | 0.0688  | H | 2.2504  | -3.761  | 0.1685  |
| H | 4.3979  | -1.4692 | -2.2601 | H | 4.4063  | -1.5945 | -2.1589 |
| H | 5.7911  | -1.5036 | -1.1975 | H | 5.7722  | -1.6411 | -1.0619 |
| H | 0.9356  | 0.9594  | 0.1765  | H | 0.9534  | 0.9793  | 0.1373  |
| H | 2.3005  | 1.0827  | 1.2677  | H | 2.2932  | 1.0881  | 1.2606  |
| H | 2.0748  | 2.2424  | -1.5661 | H | 2.1668  | 2.1968  | -1.5992 |
| H | 4.2923  | 3.1727  | -1.3412 | H | 4.404   | 3.0681  | -1.3426 |
| H | 4.4876  | 2.519   | 0.2759  | H | 4.5445  | 2.4451  | 0.2921  |
| H | 5.6848  | 1.1238  | -1.3175 | H | 5.7394  | 0.9837  | -1.241  |
| H | 4.2698  | 0.955   | -2.3303 | H | 4.3449  | 0.8309  | -2.2844 |
| H | 4.4231  | 0.6242  | 1.5546  | H | 4.3959  | 0.5835  | 1.6084  |



|             |                  |                  |                  |             |                  |                  |                  |
|-------------|------------------|------------------|------------------|-------------|------------------|------------------|------------------|
| H           | 4.8525           | -1.0783          | 1.4488           | H           | 4.7767           | -1.1326          | 1.5523           |
| H           | 5.9243           | 0.1217           | 0.7859           | H           | 5.9002           | 0.0198           | 0.89             |
| H           | -7.4268          | 0.0428           | -0.7131          | H           | -6.1778          | -0.8671          | 1.0838           |
| H           | -6.1429          | 0.2938           | -1.8848          | H           | -7.4307          | -0.2947          | -0.0132          |
| H           | -6.2156          | 1.0872           | 1.0525           | H           | -6.1513          | 1.5369           | 1.0985           |
| H           | -6.0035          | 2.1111           | -0.3683          | H           | -6.1294          | 1.6486           | -0.663           |
| H           | -6.0406          | -1.5299          | 0.5616           | H           | -6.1625          | -2.1181          | -1.0796          |
| H           | -6.2273          | -2.0748          | -1.0963          | H           | -5.9661          | -0.6079          | -1.9471          |
| H           | -1.5628          | -0.2085          | -0.879           | H           | -1.5253          | -0.1748          | -1.0185          |
| H           | -1.5924          | 0.6272           | 0.6541           | H           | -1.5794          | 0.7478           | 0.4575           |
| H           | -2.041           | -1.4214          | 1.8974           | H           | -2.119           | -1.1897          | 1.8205           |
| H           | -1.7703          | -2.9055          | -0.7699          | H           | -1.8189          | -2.94            | -0.6686          |
| H           | -1.9651          | -3.6327          | 0.8162           | H           | -2.1678          | -3.4668          | 0.9657           |
| H           | -4.1193          | -3.5183          | -0.3912          | H           | -4.2059          | -3.3825          | -0.4481          |
| H           | -4.1401          | -2.6369          | 1.1274           | H           | -4.3198          | -2.3737          | 0.9851           |
| H           | -2.7963          | -1.5734          | -2.3135          | H           | -2.5461          | -1.638           | -2.342           |
| H           | -4.3684          | -2.3182          | -2.5905          | H           | -4.1088          | -2.3193          | -2.7778          |
| H           | -4.1843          | -0.5622          | -2.688           | H           | -3.8204          | -0.58            | -2.9377          |
| H           | -2.5338          | 2.3616           | 0.71             | H           | -2.5748          | 2.4681           | 0.5328           |
| H           | 1.1894           | -0.3921          | -1.7985          | H           | 1.2182           | -0.4246          | -1.8013          |
| H           | 1.9972           | 5.3504           | 1.1994           | H           | 2.1168           | 5.3592           | 1.1052           |
| H           | 3.5736           | 4.4366           | 0.9781           | H           | 3.6717           | 4.3995           | 0.9327           |
| H           | 0.2476           | -1.6326          | 3.1569           | H           | 0.1199           | -1.4957          | 3.151            |
| H           | -0.0097          | 4.6871           | 0.3063           | H           | 0.1107           | 4.7322           | 0.1894           |
| <b>1d-3</b> | <b>X axis(Å)</b> | <b>Y axis(Å)</b> | <b>Z axis(Å)</b> | <b>1d-4</b> | <b>X axis(Å)</b> | <b>Y axis(Å)</b> | <b>Z axis(Å)</b> |
| C           | 3.8768           | -3.0742          | -0.455           | C           | 3.6341           | -3.3704          | -0.7989          |
| C           | 2.3541           | -3.0143          | -0.3621          | C           | 2.1879           | -2.9291          | -1.0074          |
| C           | 1.8177           | -1.6783          | 0.1713           | C           | 1.8126           | -1.6406          | -0.2625          |
| C           | 2.4686           | -0.4582          | -0.5419          | C           | 2.873            | -0.5186          | -0.4473          |
| C           | 4.0335           | -0.5074          | -0.5868          | C           | 4.3461           | -0.9771          | -0.1837          |
| C           | 4.4787           | -1.8684          | -1.1848          | C           | 4.6425           | -2.2404          | -1.0337          |
| C           | 1.9584           | 0.9153           | -0.0509          | C           | 2.5515           | 0.7923           | 0.3054           |
| C           | 2.5287           | 2.0828           | -0.8913          | C           | 3.5263           | 1.9369           | -0.0651          |
| C           | 4.0582           | 2.0212           | -1.0433          | C           | 4.9954           | 1.4917           | 0.0984           |
| C           | 4.5423           | 0.6416           | -1.5051          | C           | 5.3011           | 0.1717           | -0.6214          |
| C           | 4.7224           | -0.3284          | 0.788            | C           | 4.6694           | -1.3014          | 1.2957           |
| O           | 0.3808           | -1.6489          | -0.1574          | O           | 0.5627           | -1.1642          | -0.8766          |
| C           | 2.0532           | 3.4363           | -0.399           | C           | 3.1643           | 3.2113           | 0.6836           |
| C           | -6.4918          | 0.2773           | -0.8385          | C           | -6.6342          | 1.4031           | -0.3279          |
| C           | -5.8509          | 1.3917           | -0.0215          | C           | -6.6775          | -0.1179          | -0.262           |
| C           | -4.3596          | 1.2349           | 0.1714           | C           | -5.3771          | -0.753           | 0.1765           |
| C           | -3.6857          | 0.0834           | -0.0727          | C           | -4.193           | -0.0924          | 0.2166           |
| C           | -4.4195          | -1.1867          | -0.556           | C           | -4.0841          | 1.3814           | -0.2312          |
| C           | -5.9604          | -1.0741          | -0.3911          | C           | -5.349           | 1.8611           | -0.9959          |
| C           | -2.1804          | -0.0976          | 0.0749           | C           | -2.8729          | -0.6829          | 0.6979           |
| C           | -1.8104          | -1.3218          | 0.9326           | C           | -1.7317          | -0.5073          | -0.3244          |
| C           | -2.4595          | -2.5938          | 0.3778           | C           | -1.571           | 0.9752           | -0.6911          |

|   |         |         |         |   |         |         |         |
|---|---------|---------|---------|---|---------|---------|---------|
| C | -3.9737 | -2.4236 | 0.2705  | C | -2.8853 | 1.5632  | -1.199  |
| C | -4.0995 | -1.4148 | -2.0527 | C | -3.8937 | 2.2788  | 1.0147  |
| C | -3.6997 | 2.4961  | 0.6365  | C | -5.5416 | -2.1857 | 0.58    |
| O | -4.3309 | 3.5091  | 0.9193  | O | -6.6106 | -2.7804 | 0.49    |
| C | -0.3154 | -1.4781 | 1.0324  | C | -0.4005 | -1.0694 | 0.1223  |
| C | 1.7583  | -1.6444 | 1.6871  | C | 1.3402  | -1.8978 | 1.1542  |
| O | 2.0142  | -0.541  | -1.931  | O | 2.8071  | -0.1657 | -1.8636 |
| C | 1.2961  | 4.2618  | -1.1412 | C | 3.8437  | 3.7773  | 1.695   |
| O | 2.6788  | -1.7926 | 2.4745  | O | 1.971   | -2.3944 | 2.074   |
| C | 0.393   | -1.4564 | 2.1562  | C | -0.0459 | -1.4874 | 1.3333  |
| C | 2.4212  | 3.9136  | 0.9628  | C | 1.9443  | 3.9448  | 0.2277  |
| O | 3.0626  | 3.2405  | 1.7591  | O | 1.2079  | 3.5329  | -0.6607 |
| H | 4.3027  | -3.1636 | 0.5497  | H | 3.7497  | -3.7839 | 0.2082  |
| H | 4.1659  | -3.9904 | -0.984  | H | 3.8579  | -4.1947 | -1.4869 |
| H | 1.9334  | -3.2031 | -1.3592 | H | 2.0181  | -2.7874 | -2.0835 |
| H | 1.9977  | -3.8451 | 0.2605  | H | 1.5163  | -3.7474 | -0.7171 |
| H | 4.1913  | -1.9255 | -2.2428 | H | 4.6367  | -1.9859 | -2.1015 |
| H | 5.573   | -1.9489 | -1.1649 | H | 5.6523  | -2.612  | -0.8178 |
| H | 0.8652  | 0.9588  | -0.138  | H | 1.5359  | 1.1124  | 0.0473  |
| H | 2.1893  | 1.0419  | 1.0105  | H | 2.5554  | 0.6316  | 1.3896  |
| H | 2.125   | 1.9559  | -1.907  | H | 3.4008  | 2.1613  | -1.1342 |
| H | 4.3843  | 2.7711  | -1.7755 | H | 5.6607  | 2.27    | -0.2966 |
| H | 4.5576  | 2.2838  | -0.1044 | H | 5.2497  | 1.3792  | 1.1583  |
| H | 5.6394  | 0.6425  | -1.5413 | H | 6.3447  | -0.1072 | -0.4265 |
| H | 4.2136  | 0.4797  | -2.5397 | H | 5.2369  | 0.3355  | -1.7046 |
| H | 4.309   | 0.5028  | 1.3646  | H | 4.3141  | -0.534  | 1.9877  |
| H | 4.6691  | -1.2196 | 1.4118  | H | 4.2563  | -2.2543 | 1.6245  |
| H | 5.7932  | -0.1276 | 0.6585  | H | 5.7534  | -1.387  | 1.4417  |
| H | -7.5803 | 0.3113  | -0.7134 | H | -7.5002 | 1.7702  | -0.8908 |
| H | -6.2965 | 0.4333  | -1.9055 | H | -6.716  | 1.826   | 0.6799  |
| H | -6.3235 | 1.4306  | 0.9685  | H | -6.9378 | -0.5145 | -1.2519 |
| H | -6.0756 | 2.3417  | -0.5217 | H | -7.4902 | -0.3976 | 0.4196  |
| H | -6.2403 | -1.2187 | 0.6616  | H | -5.3417 | 1.4717  | -2.0234 |
| H | -6.4647 | -1.8709 | -0.9522 | H | -5.3508 | 2.9547  | -1.0855 |
| H | -1.7469 | -0.1904 | -0.9295 | H | -2.6102 | -0.1969 | 1.6463  |
| H | -1.6946 | 0.7733  | 0.5193  | H | -2.9517 | -1.7467 | 0.9289  |
| H | -2.2099 | -1.1545 | 1.9437  | H | -2.0201 | -1.0568 | -1.2325 |
| H | -2.0416 | -2.8515 | -0.6028 | H | -1.2103 | 1.5474  | 0.1726  |
| H | -2.2421 | -3.4433 | 1.0377  | H | -0.8117 | 1.0928  | -1.4749 |
| H | -4.4052 | -3.3373 | -0.1584 | H | -2.7373 | 2.6288  | -1.4173 |
| H | -4.3734 | -2.3468 | 1.2913  | H | -3.1135 | 1.0832  | -2.1609 |
| H | -3.0349 | -1.5957 | -2.2313 | H | -2.9637 | 2.0632  | 1.5498  |
| H | -4.6416 | -2.2845 | -2.4415 | H | -3.8619 | 3.3379  | 0.734   |
| H | -4.3799 | -0.5497 | -2.6634 | H | -4.71   | 2.1512  | 1.734   |
| H | -2.6062 | 2.4908  | 0.7176  | H | -4.6562 | -2.7038 | 0.9673  |
| H | 1.0613  | -0.7549 | -1.9017 | H | 1.8687  | 0.0264  | -2.0623 |
| H | 0.9593  | 5.2313  | -0.7856 | H | 3.5249  | 4.7018  | 2.1685  |

|             |                  |                  |                  |             |                  |                  |                  |
|-------------|------------------|------------------|------------------|-------------|------------------|------------------|------------------|
| H           | 0.9907           | 3.987            | -2.1473          | H           | 4.7507           | 3.3372           | 2.0963           |
| H           | 0.0894           | -1.3479          | 3.18             | H           | -0.5881          | -1.5315          | 2.2583           |
| H           | 2.0708           | 4.9257           | 1.2278           | H           | 1.7302           | 4.8933           | 0.749            |
| <b>1d-5</b> | <b>X axis(Å)</b> | <b>Y axis(Å)</b> | <b>Z axis(Å)</b> | <b>1d-6</b> | <b>X axis(Å)</b> | <b>Y axis(Å)</b> | <b>Z axis(Å)</b> |
| C           | -2.9478          | -3.5364          | 0.2548           | C           | 4.1834           | -2.7267          | -0.6791          |
| C           | -1.5674          | -2.8861          | 0.2228           | C           | 2.6629           | -2.8342          | -0.582           |
| C           | -1.5687          | -1.4364          | -0.2831          | C           | 1.9956           | -1.6308          | 0.0965           |
| C           | -2.6815          | -0.5786          | 0.3809           | C           | 2.5213           | -0.2758          | -0.4613          |
| C           | -4.1005          | -1.2403          | 0.3631           | C           | 4.0811           | -0.161           | -0.5013          |
| C           | -3.9994          | -2.67            | 0.9564           | C           | 4.6561           | -1.3876          | -1.2576          |
| C           | -2.7379          | 0.884            | -0.1149          | C           | 1.8854           | 0.972            | 0.1892           |
| C           | -3.7265          | 1.7447           | 0.7101           | C           | 2.2938           | 2.285            | -0.5179          |
| C           | -5.1169          | 1.0787           | 0.7878           | C           | 3.8274           | 2.3938           | -0.6417          |
| C           | -5.0505          | -0.3828          | 1.2493           | C           | 4.458            | 1.1416           | -1.2679          |
| C           | -4.7527          | -1.3424          | -1.0378          | C           | 4.7595           | -0.0844          | 0.8886           |
| O           | -0.2734          | -0.8642          | 0.1216           | O           | 0.5629           | -1.7093          | -0.2324          |
| C           | -3.7405          | 3.1785           | 0.2015           | C           | 1.6161           | 3.4651           | 0.161            |
| C           | 6.8776           | 0.7011           | 0.2525           | C           | -6.265           | 0.3197           | -0.8274          |
| C           | 6.1419           | 0.2655           | 1.5129           | C           | -5.5845          | 1.3808           | 0.0321           |
| C           | 4.7727           | -0.3234          | 1.257            | C           | -4.1154          | 1.1362           | 0.2358           |
| C           | 4.1167           | -0.2173          | 0.0743           | C           | -3.4829          | -0.0185          | -0.0714          |
| C           | 4.7223           | 0.5697           | -1.1071          | C           | -4.2434          | -1.2355          | -0.6179          |
| C           | 5.9319           | 1.4443           | -0.6754          | C           | -5.7802          | -1.0739          | -0.4446          |
| C           | 2.7604           | -0.841           | -0.2353          | C           | -1.9839          | -0.2178          | 0.0595           |
| C           | 1.7473           | 0.179            | -0.7912          | C           | -1.6352          | -1.4781          | 0.8697           |
| C           | 2.326            | 0.8806           | -2.0288          | C           | -2.3066          | -2.7154          | 0.2605           |
| C           | 3.6672           | 1.5373           | -1.7071          | C           | -3.8213          | -2.517           | 0.1518           |
| C           | 5.1984           | -0.4272          | -2.1904          | C           | -3.9297          | -1.4017          | -2.1232          |
| C           | 4.2265           | -1.051           | 2.4473           | C           | -3.3854          | 2.3132           | 0.7886           |
| O           | 4.8298           | -1.12            | 3.5134           | O           | -2.7066          | 2.2669           | 1.8079           |
| C           | 0.4087           | -0.4833          | -1.0288          | C           | -0.1415          | -1.6493          | 0.964            |
| C           | -1.4522          | -1.3426          | -1.7914          | C           | 1.9367           | -1.7658          | 1.6069           |
| O           | -2.2982          | -0.4866          | 1.7878           | O           | 2.0771           | -0.2403          | -1.8531          |
| C           | -4.719           | 3.7827           | -0.4929          | C           | 2.1887           | 4.3638           | 0.9788           |
| O           | -2.2466          | -1.7395          | -2.629           | O           | 2.8698           | -1.9269          | 2.378            |
| C           | -0.2008          | -0.7123          | -2.1877          | C           | 0.5645           | -1.6961          | 2.0886           |
| C           | -2.5594          | 4.0292           | 0.5402           | C           | 0.1609           | 3.6689           | -0.1207          |
| O           | -1.5803          | 3.6039           | 1.1415           | O           | -0.4749          | 2.9765           | -0.9078          |
| H           | -3.2652          | -3.773           | -0.766           | H           | 4.626            | -2.8927          | 0.3086           |
| H           | -2.8763          | -4.4992          | 0.7751           | H           | 4.558            | -3.5393          | -1.3134          |
| H           | -1.1445          | -2.915           | 1.2363           | H           | 2.2548           | -2.9515          | -1.5951          |
| H           | -0.8932          | -3.5025          | -0.386           | H           | 2.3995           | -3.7622          | -0.0582          |
| H           | -3.7506          | -2.6181          | 2.0243           | H           | 4.368            | -1.3461          | -2.316           |
| H           | -4.9733          | -3.1726          | 0.898            | H           | 5.7531           | -1.3594          | -1.2428          |
| H           | -1.7397          | 1.3294           | -0.0285          | H           | 0.7958           | 0.8914           | 0.1299           |
| H           | -3.0005          | 0.926            | -1.1782          | H           | 2.1337           | 1.025            | 1.2555           |
| H           | -3.3606          | 1.7878           | 1.7461           | H           | 1.9144           | 2.2551           | -1.5492          |

|             |                  |                  |                  |             |                  |                  |                  |
|-------------|------------------|------------------|------------------|-------------|------------------|------------------|------------------|
| H           | -5.7536          | 1.639            | 1.4844           | H           | 4.0847           | 3.2647           | -1.2579          |
| H           | -5.6192          | 1.1164           | -0.1852          | H           | 4.2857           | 2.5651           | 0.3385           |
| H           | -6.0633          | -0.806           | 1.2402           | H           | 5.5484           | 1.2656           | -1.2918          |
| H           | -4.7292          | -0.4095          | 2.2983           | H           | 4.1452           | 1.0747           | -2.3177          |
| H           | -4.6861          | -0.4124          | -1.6076          | H           | 4.2736           | 0.627            | 1.5609           |
| H           | -4.3249          | -2.134           | -1.652           | H           | 4.7956           | -1.0454          | 1.4              |
| H           | -5.8185          | -1.5872          | -0.9482          | H           | 5.8053           | 0.2321           | 0.7885           |
| H           | 7.7198           | 1.3477           | 0.5251           | H           | -7.3515          | 0.3856           | -0.6973          |
| H           | 7.3066           | -0.1714          | -0.2532          | H           | -6.0671          | 0.5143           | -1.8877          |
| H           | 6.025            | 1.1305           | 2.1786           | H           | -6.0677          | 1.4091           | 1.0171           |
| H           | 6.7793           | -0.458           | 2.0359           | H           | -5.7491          | 2.3611           | -0.4312          |
| H           | 5.5814           | 2.3459           | -0.1543          | H           | -6.0641          | -1.2579          | 0.6007           |
| H           | 6.4831           | 1.7972           | -1.5562          | H           | -6.3129          | -1.8246          | -1.0418          |
| H           | 2.9082           | -1.6514          | -0.9613          | H           | -1.5583          | -0.2827          | -0.9505          |
| H           | 2.3165           | -1.3213          | 0.6382           | H           | -1.4916          | 0.6414           | 0.5215           |
| H           | 1.5847           | 0.9517           | -0.0252          | H           | -2.0343          | -1.3457          | 1.886            |
| H           | 2.4517           | 0.1729           | -2.8568          | H           | -1.8875          | -2.9389          | -0.7281          |
| H           | 1.6304           | 1.6532           | -2.3806          | H           | -2.1065          | -3.5947          | 0.8857           |
| H           | 4.0622           | 2.0048           | -2.6184          | H           | -4.2642          | -3.4025          | -0.3218          |
| H           | 3.4759           | 2.3573           | -1.001           | H           | -4.2259          | -2.4817          | 1.1729           |
| H           | 4.3769           | -1.0156          | -2.6106          | H           | -2.8713          | -1.6083          | -2.3107          |
| H           | 5.6743           | 0.0995           | -3.0258          | H           | -4.4994          | -2.2342          | -2.5521          |
| H           | 5.9268           | -1.1415          | -1.7913          | H           | -4.1817          | -0.5             | -2.692           |
| H           | 3.2467           | -1.531           | 2.3386           | H           | -3.5445          | 3.2546           | 0.2365           |
| H           | -1.3833          | -0.1418          | 1.8093           | H           | 1.1132           | -0.4048          | -1.8437          |
| H           | -4.6572          | 4.821            | -0.807           | H           | 1.6338           | 5.1865           | 1.4212           |
| H           | -5.6262          | 3.2617           | -0.7807          | H           | 3.2386           | 4.3102           | 1.2464           |
| H           | 0.0984           | -0.5122          | -3.1987          | H           | 0.2541           | -1.6582          | 3.1152           |
| H           | -2.6109          | 5.0797           | 0.2072           | H           | -0.3219          | 4.4981           | 0.424            |
| <b>1d-7</b> | <b>X axis(Å)</b> | <b>Y axis(Å)</b> | <b>Z axis(Å)</b> | <b>1d-8</b> | <b>X axis(Å)</b> | <b>Y axis(Å)</b> | <b>Z axis(Å)</b> |
| C           | -2.806           | -3.5471          | -0.4787          | C           | 3.4171           | -3.4883          | -0.631           |
| C           | -1.4274          | -2.9028          | -0.3585          | C           | 1.9848           | -3.0187          | -0.8719          |
| C           | -1.4432          | -1.3729          | -0.4912          | C           | 1.6688           | -1.6478          | -0.2566          |
| C           | -2.5403          | -0.7179          | 0.3954           | C           | 2.7588           | -0.5891          | -0.5897          |
| C           | -3.9609          | -1.3573          | 0.2273           | C           | 4.2212           | -1.0663          | -0.2925          |
| C           | -3.8518          | -2.8919          | 0.4297           | C           | 4.4615           | -2.4282          | -0.9962          |
| C           | -2.598           | 0.8237           | 0.3048           | C           | 2.4898           | 0.8134           | 0.0011           |
| C           | -3.6042          | 1.4275           | 1.314            | C           | 3.526            | 1.8564           | -0.4823          |
| C           | -4.9896          | 0.7612           | 1.2531           | C           | 4.9798           | 1.388            | -0.2994          |
| C           | -4.9042          | -0.768           | 1.3158           | C           | 5.2151           | -0.0161          | -0.8678          |
| C           | -4.6289          | -1.0914          | -1.1439          | C           | 4.5522           | -1.2281          | 1.2113           |
| O           | -0.1407          | -0.9036          | 0.015            | O           | 0.4178           | -1.1923          | -0.8882          |
| C           | -3.6912          | 2.9383           | 1.2149           | C           | 3.288            | 3.2308           | 0.1129           |
| C           | 6.9624           | 0.8223           | 0.3854           | C           | -6.7366          | 1.5118           | -0.421           |
| C           | 6.2737           | 0.0576           | 1.508            | C           | -6.7863          | 0.0014           | -0.2319          |
| C           | 4.9195           | -0.5004          | 1.1323           | C           | -5.4824          | -0.6032          | 0.2381           |
| C           | 4.2254           | -0.1162          | 0.032            | C           | -4.2943          | 0.0505           | 0.2046           |

|   |         |         |         |   |         |         |         |
|---|---------|---------|---------|---|---------|---------|---------|
| C | 4.7734  | 0.9686  | -0.9194 | C | -4.1853 | 1.4818  | -0.3636 |
| C | 5.9711  | 1.7443  | -0.3041 | C | -5.4602 | 1.9063  | -1.1442 |
| C | 2.8757  | -0.6832 | -0.3941 | C | -2.9697 | -0.5089 | 0.7102  |
| C | 1.8208  | 0.4123  | -0.6464 | C | -1.8463 | -0.4245 | -0.3432 |
| C | 2.3432  | 1.424   | -1.6771 | C | -1.6819 | 1.0216  | -0.831  |
| C | 3.6755  | 2.0214  | -1.2281 | C | -3.0017 | 1.5766  | -1.3624 |
| C | 5.2441  | 0.2989  | -2.2323 | C | -3.9692 | 2.4761  | 0.802   |
| C | 4.4364  | -1.5393 | 2.097   | C | -5.6487 | -1.9958 | 0.7638  |
| O | 5.0313  | -1.8019 | 3.1371  | O | -6.7174 | -2.5961 | 0.7183  |
| C | 0.4914  | -0.2087 | -1.0121 | C | -0.5119 | -0.9625 | 0.1221  |
| C | -1.3596 | -0.9196 | -1.935  | C | 1.2259  | -1.7533 | 1.1887  |
| O | -2.1286 | -0.9897 | 1.7732  | O | 2.6746  | -0.3981 | -2.0384 |
| C | -3.3476 | 3.7594  | 2.2215  | C | 2.9825  | 4.3079  | -0.63   |
| O | -2.1353 | -1.169  | -2.8435 | O | 1.8468  | -2.221  | 2.1295  |
| C | -0.1487 | -0.1483 | -2.1758 | C | -0.133  | -1.2593 | 1.3614  |
| C | -4.1788 | 3.5842  | -0.0351 | C | 3.392   | 3.443   | 1.5831  |
| O | -4.4859 | 2.957   | -1.0405 | O | 3.6196  | 2.5407  | 2.3784  |
| H | -3.135  | -3.5184 | -1.5226 | H | 3.5326  | -3.7942 | 0.414   |
| H | -2.7265 | -4.61   | -0.2201 | H | 3.6019  | -4.3898 | -1.2277 |
| H | -0.9941 | -3.1788 | 0.6125  | H | 1.8051  | -2.9811 | -1.9549 |
| H | -0.7565 | -3.3445 | -1.1067 | H | 1.2881  | -3.7776 | -0.4927 |
| H | -3.5931 | -3.1156 | 1.4729  | H | 4.4527  | -2.2945 | -2.0859 |
| H | -4.8258 | -3.3657 | 0.2524  | H | 5.4599  | -2.8102 | -0.7475 |
| H | -1.6114 | 1.247   | 0.5358  | H | 1.5009  | 1.1678  | -0.3172 |
| H | -2.8329 | 1.1294  | -0.7186 | H | 2.4619  | 0.7598  | 1.093   |
| H | -3.2094 | 1.1981  | 2.3152  | H | 3.3805  | 1.9525  | -1.5687 |
| H | -5.603  | 1.1134  | 2.0926  | H | 5.6571  | 2.0892  | -0.8039 |
| H | -5.528  | 1.0561  | 0.3459  | H | 5.2677  | 1.4032  | 0.7574  |
| H | -5.9138 | -1.1861 | 1.2117  | H | 6.25    | -0.3166 | -0.6586 |
| H | -4.5654 | -1.0625 | 2.3174  | H | 5.1365  | 0.0275  | -1.9617 |
| H | -4.5594 | -0.0459 | -1.4541 | H | 4.2199  | -0.3783 | 1.8127  |
| H | -4.2148 | -1.7007 | -1.9462 | H | 4.1225  | -2.1282 | 1.649   |
| H | -5.6958 | -1.3449 | -1.1076 | H | 5.6354  | -1.3215 | 1.3589  |
| H | 7.7937  | 1.4067  | 0.7965  | H | -7.6098 | 1.8376  | -0.9981 |
| H | 7.4007  | 0.1212  | -0.334  | H | -6.7999 | 2.0151  | 0.5504  |
| H | 6.1446  | 0.723   | 2.3714  | H | -7.0628 | -0.4725 | -1.1827 |
| H | 6.9471  | -0.7493 | 1.8224  | H | -7.5901 | -0.2177 | 0.4817  |
| H | 5.6115  | 2.4723  | 0.4362  | H | -5.4718 | 1.4353  | -2.1368 |
| H | 6.4877  | 2.327   | -1.0772 | H | -5.4579 | 2.9891  | -1.3217 |
| H | 3.0197  | -1.2793 | -1.3048 | H | -2.6878 | 0.0502  | 1.6116  |
| H | 2.4702  | -1.3793 | 0.3422  | H | -3.0507 | -1.5504 | 1.0266  |
| H | 1.6638  | 0.9588  | 0.2954  | H | -2.1567 | -1.0424 | -1.1987 |
| H | 2.4628  | 0.9543  | -2.6606 | H | -1.3024 | 1.6589  | -0.0228 |
| H | 1.6176  | 2.2373  | -1.8047 | H | -0.9356 | 1.0687  | -1.6345 |
| H | 4.0302  | 2.7189  | -1.9978 | H | -2.8513 | 2.62    | -1.6683 |
| H | 3.4836  | 2.6272  | -0.3315 | H | -3.2491 | 1.0225  | -2.2787 |
| H | 4.4272  | -0.1927 | -2.7697 | H | -3.0315 | 2.2982  | 1.3376  |

|             |                  |                  |                  |              |                  |                  |                  |
|-------------|------------------|------------------|------------------|--------------|------------------|------------------|------------------|
| H           | 5.6775           | 1.038            | -2.916           | H            | -3.9364          | 3.5087           | 0.4356           |
| H           | 6.0055           | -0.4664          | -2.0461          | H            | -4.7741          | 2.4128           | 1.5424           |
| H           | 3.5124           | -2.0722          | 1.842            | H            | -4.7657          | -2.4773          | 1.2006           |
| H           | -1.1746          | -0.7849          | 1.8256           | H            | 1.7241           | -0.3284          | -2.2557          |
| H           | -3.4139          | 4.8409           | 2.1482           | H            | 2.816            | 5.2914           | -0.2007          |
| H           | -2.987           | 3.363            | 3.167            | H            | 2.8937           | 4.2337           | -1.7106          |
| H           | 0.112            | 0.3148           | -3.1083          | H            | -0.6488          | -1.1945          | 2.3003           |
| H           | -4.2449          | 4.6852           | -0.0116          | H            | 3.2424           | 4.4797           | 1.9298           |
| <b>1d-9</b> | <b>X axis(Å)</b> | <b>Y axis(Å)</b> | <b>Z axis(Å)</b> | <b>1d-10</b> | <b>X axis(Å)</b> | <b>Y axis(Å)</b> | <b>Z axis(Å)</b> |
| C           | 3.7585           | -3.1873          | -0.6161          | C            | 3.7881           | -3.1583          | -0.2462          |
| C           | 2.24             | -3.0429          | -0.563           | C            | 2.2664           | -3.0413          | -0.2103          |
| C           | 1.7579           | -1.763           | 0.1349           | C            | 1.7607           | -1.6646          | 0.2439           |
| C           | 2.5175           | -0.4991          | -0.3571          | C            | 2.4797           | -0.5013          | -0.4979          |
| C           | 4.0768           | -0.6482          | -0.3595          | C            | 4.0424           | -0.6074          | -0.4854          |
| C           | 4.4591           | -1.9306          | -1.1442          | C            | 4.4575           | -2.0086          | -1.0069          |
| C           | 2.0839           | 0.8121           | 0.337            | C            | 2.0038           | 0.9098           | -0.0851          |
| C           | 2.7368           | 2.0624           | -0.3072          | C            | 2.6449           | 2.018            | -0.9543          |
| C           | 4.265            | 1.9147           | -0.4237          | C            | 4.1754           | 1.8954           | -1.0507          |
| C           | 4.688            | 0.5916           | -1.0734          | C            | 4.6235           | 0.4804           | -1.4347          |
| C           | 4.7267           | -0.7271          | 1.0439           | C            | 4.6908           | -0.3908          | 0.9037           |
| O           | 0.3459           | -1.5926          | -0.2538          | O            | 0.3383           | -1.6011          | -0.1383          |
| C           | 2.3843           | 3.3718           | 0.3812           | C            | 2.205            | 3.4084           | -0.5374          |
| C           | -6.4882          | 0.4961           | -0.9156          | C            | -6.5306          | -0.1151          | 0.1001           |
| C           | -5.8967          | 1.4147           | 0.1455           | C            | -5.9248          | 1.283            | 0.1179           |
| C           | -4.4153          | 1.2171           | 0.3702           | C            | -4.4153          | 1.2614           | 0.1307           |
| C           | -3.7247          | 0.1339           | -0.0642          | C            | -3.6889          | 0.1828           | -0.2508          |
| C           | -4.4275          | -1.01            | -0.8277          | C            | -4.3557          | -1.0745          | -0.8511          |
| C           | -5.9758          | -0.9219          | -0.7262          | C            | -5.8959          | -0.935           | -1.0094          |
| C           | -2.229           | -0.0831          | 0.1277           | C            | -2.1875          | 0.0273           | -0.0613          |
| C           | -1.9055          | -1.4556          | 0.7467           | C            | -1.8796          | -1.1742          | 0.8572           |
| C           | -2.5157          | -2.5875          | -0.0863          | C            | -2.5464          | -2.4647          | 0.3553           |
| C           | -4.0222          | -2.3898          | -0.2416          | C            | -4.0433          | -2.269           | 0.0881           |
| C           | -4.027           | -0.938           | -2.3205          | C            | -3.81            | -1.3636          | -2.2716          |
| C           | -3.7819          | 2.3598           | 1.1008           | C            | -3.804           | 2.5275           | 0.6424           |
| O           | -4.4361          | 3.2574           | 1.6208           | O            | -4.4726          | 3.4714           | 1.0493           |
| C           | -0.4187          | -1.6412          | 0.9031           | C            | -0.3939          | -1.3629          | 1.0177           |
| C           | 1.615            | -1.9337          | 1.6361           | C            | 1.6498           | -1.56            | 1.7535           |
| O           | 2.1201           | -0.337           | -1.7527          | O            | 2.0697           | -0.6299          | -1.8974          |
| C           | 2.0535           | 3.5416           | 1.6723           | C            | 1.5063           | 4.2279           | -1.3409          |
| O           | 2.4969           | -2.1461          | 2.4526           | O            | 2.5377           | -1.6981          | 2.5793           |
| C           | 0.2227           | -1.8341          | 2.05             | C            | 0.2752           | -1.3132          | 2.1645           |
| C           | 2.3796           | 4.6033           | -0.4646          | C            | 2.5448           | 3.9312           | 0.815            |
| O           | 2.6353           | 4.5921           | -1.662           | O            | 3.1346           | 3.2714           | 1.6608           |
| H           | 4.1369           | -3.4479          | 0.3777           | H            | 4.1761           | -3.2167          | 0.776            |
| H           | 4.0135           | -4.0349          | -1.2638          | H            | 4.0616           | -4.1071          | -0.7236          |
| H           | 1.8508           | -3.0639          | -1.5901          | H            | 1.8734           | -3.2606          | -1.2124          |
| H           | 1.8109           | -3.9283          | -0.0764          | H            | 1.8592           | -3.8302          | 0.4354           |

|              |                  |                  |                  |              |                  |                  |                  |
|--------------|------------------|------------------|------------------|--------------|------------------|------------------|------------------|
| H            | 4.2062           | -1.8119          | -2.2058          | H            | 4.2038           | -2.1035          | -2.0708          |
| H            | 5.5451           | -2.0854          | -1.1084          | H            | 5.547            | -2.1263          | -0.9452          |
| H            | 0.9959           | 0.9344           | 0.2563           | H            | 0.9163           | 0.9876           | -0.2122          |
| H            | 2.3166           | 0.7559           | 1.4047           | H            | 2.2033           | 1.0752           | 0.9774           |
| H            | 2.3333           | 2.1194           | -1.328           | H            | 2.2704           | 1.8609           | -1.9771          |
| H            | 4.6758           | 2.7386           | -1.0211          | H            | 4.5528           | 2.5997           | -1.8034          |
| H            | 4.7279           | 2.0039           | 0.567            | H            | 4.6529           | 2.1822           | -0.1076          |
| H            | 5.7839           | 0.5289           | -1.0728          | H            | 5.7204           | 0.441            | -1.4325          |
| H            | 4.395            | 0.6086           | -2.131           | H            | 4.3237           | 0.2839           | -2.4721          |
| H            | 4.3607           | 0.0436           | 1.7268           | H            | 4.2891           | 0.4797           | 1.4283           |
| H            | 4.5815           | -1.6917          | 1.5287           | H            | 4.5839           | -1.2505          | 1.5638           |
| H            | 5.814            | -0.5988          | 0.9711           | H            | 5.7721           | -0.234           | 0.8033           |
| H            | -7.582           | 0.5111           | -0.8444          | H            | -6.3837          | -0.6051          | 1.07             |
| H            | -6.2363          | 0.8656           | -1.9162          | H            | -7.6126          | -0.0445          | -0.0594          |
| H            | -6.4153          | 1.2476           | 1.0983           | H            | -6.3136          | 1.7968           | 1.0053           |
| H            | -6.1042          | 2.4489           | -0.1558          | H            | -6.2631          | 1.8497           | -0.7585          |
| H            | -6.3115          | -1.2763          | 0.2582           | H            | -6.3679          | -1.9247          | -1.0516          |
| H            | -6.4459          | -1.584           | -1.4643          | H            | -6.1344          | -0.4469          | -1.9648          |
| H            | -1.7381          | 0.0216           | -0.8485          | H            | -1.7068          | -0.0877          | -1.04            |
| H            | -1.7739          | 0.6781           | 0.765            | H            | -1.722           | 0.9114           | 0.3797           |
| H            | -2.3653          | -1.4886          | 1.7455           | H            | -2.3078          | -0.9498          | 1.8456           |
| H            | -2.0423          | -2.6466          | -1.0738          | H            | -2.0544          | -2.8259          | -0.556           |
| H            | -2.3311          | -3.553           | 0.4018           | H            | -2.4206          | -3.2602          | 1.1011           |
| H            | -4.4247          | -3.1967          | -0.8675          | H            | -4.4476          | -3.1977          | -0.3345          |
| H            | -4.4783          | -2.5159          | 0.7503           | H            | -4.5475          | -2.1255          | 1.0529           |
| H            | -2.9533          | -1.0847          | -2.4742          | H            | -2.7384          | -1.5802          | -2.2896          |
| H            | -4.5423          | -1.7107          | -2.9026          | H            | -4.3166          | -2.2301          | -2.7131          |
| H            | -4.2801          | 0.0324           | -2.7614          | H            | -3.9753          | -0.5074          | -2.9366          |
| H            | -2.6865          | 2.3731           | 1.157            | H            | -2.7093          | 2.5974           | 0.6227           |
| H            | 1.1493           | -0.4391          | -1.7885          | H            | 1.1091           | -0.8086          | -1.8923          |
| H            | 1.806            | 4.5152           | 2.0871           | H            | 1.1956           | 5.224            | -1.0393          |
| H            | 2.0333           | 2.7158           | 2.3751           | H            | 1.2252           | 3.9205           | -2.3446          |
| H            | -0.1422          | -1.9094          | 3.0567           | H            | -0.0611          | -1.1547          | 3.1715           |
| H            | 2.1268           | 5.5433           | 0.0547           | H            | 2.2234           | 4.9656           | 1.0245           |
| <b>1d-11</b> | <b>X axis(Å)</b> | <b>Y axis(Å)</b> | <b>Z axis(Å)</b> | <b>1d-12</b> | <b>X axis(Å)</b> | <b>Y axis(Å)</b> | <b>Z axis(Å)</b> |
| C            | 3.5489           | -3.4057          | -0.779           | C            | -3.037           | -3.4374          | 0.6913           |
| C            | 2.0991           | -2.9585          | -0.9458          | C            | -1.6331          | -2.8482          | 0.5845           |
| C            | 1.7589           | -1.6514          | -0.2165          | C            | -1.5793          | -1.4763          | -0.1029          |
| C            | 2.8193           | -0.5415          | -0.4632          | C            | -2.66            | -0.4998          | 0.439            |
| C            | 4.2979           | -1.0048          | -0.242           | C            | -4.1028          | -1.1054          | 0.4976           |
| C            | 4.5556           | -2.2884          | -1.074           | C            | -4.0561          | -2.4498          | 1.2699           |
| C            | 2.5333           | 0.7877           | 0.2714           | C            | -2.661           | 0.8881           | -0.2407          |
| C            | 3.5018           | 1.9169           | -0.1582          | C            | -3.6176          | 1.8837           | 0.4612           |
| C            | 4.9728           | 1.4646           | -0.0371          | C            | -5.032           | 1.2851           | 0.6155           |
| C            | 5.2441           | 0.1272           | -0.7383          | C            | -5.021           | -0.1066          | 1.2609           |
| C            | 4.6715           | -1.2994          | 1.2318           | C            | -4.7568          | -1.3621          | -0.8825          |
| O            | 0.4912           | -1.1792          | -0.7963          | O            | -0.2639          | -0.9055          | 0.2327           |

|   |         |         |         |   |         |         |         |
|---|---------|---------|---------|---|---------|---------|---------|
| C | 3.1751  | 3.2097  | 0.5751  | C | -3.5774 | 3.2398  | -0.2272 |
| C | -6.1897 | 1.1313  | -1.316  | C | 6.2088  | 1.6021  | 0.2744  |
| C | -6.5443 | -0.1068 | -0.5019 | C | 5.9394  | 0.718   | 1.4856  |
| C | -5.3433 | -0.7198 | 0.1779  | C | 4.6873  | -0.1121 | 1.3309  |
| C | -4.192  | -0.0391 | 0.3982  | C | 4.1224  | -0.3782 | 0.1277  |
| C | -4.0626 | 1.4642  | 0.0693  | C | 4.7866  | 0.0612  | -1.1946 |
| C | -5.3815 | 2.0921  | -0.4621 | C | 6.1576  | 0.7653  | -0.9914 |
| C | -2.8885 | -0.6538 | 0.8872  | C | 2.7627  | -1.0319 | -0.0763 |
| C | -1.7792 | -0.498  | -0.1779 | C | 1.7957  | -0.0638 | -0.7935 |
| C | -1.6204 | 0.9732  | -0.6055 | C | 2.406   | 0.4558  | -2.1092 |
| C | -2.9549 | 1.6129  | -1.0044 | C | 3.811   | 1.0355  | -1.9048 |
| C | -3.6872 | 2.2796  | 1.3315  | C | 5.0721  | -1.1597 | -2.104  |
| C | -5.5352 | -2.1591 | 0.5395  | C | 4.1127  | -0.5659 | 2.6366  |
| O | -6.5654 | -2.7752 | 0.2886  | O | 4.6366  | -0.3086 | 3.7155  |
| C | -0.436  | -1.0582 | 0.2332  | C | 0.4335  | -0.7006 | -0.9529 |
| C | 1.3354  | -1.8745 | 1.2213  | C | -1.4577 | -1.581  | -1.61   |
| O | 2.7055  | -0.2189 | -1.8837 | O | -2.2753 | -0.2423 | 1.8247  |
| C | 3.8939  | 3.7923  | 1.5492  | C | -4.5323 | 3.7862  | -0.9982 |
| O | 1.9957  | -2.3542 | 2.1294  | O | -2.2653 | -2.0528 | -2.3946 |
| C | -0.0416 | -1.4524 | 1.4399  | C | -0.1832 | -1.0531 | -2.0764 |
| C | 1.9445  | 3.9424  | 0.147   | C | -2.365  | 4.0821  | 0.0054  |
| O | 1.1739  | 3.5168  | -0.7053 | O | -1.4026 | 3.701   | 0.6606  |
| H | 3.6975  | -3.7981 | 0.2323  | H | -3.3618 | -3.7911 | -0.2926 |
| H | 3.7427  | -4.2463 | -1.4562 | H | -3.0021 | -4.3275 | 1.3312  |
| H | 1.8921  | -2.8389 | -2.0181 | H | -1.2127 | -2.7625 | 1.5959  |
| H | 1.4329  | -3.7653 | -0.614  | H | -0.9818 | -3.5621 | 0.0638  |
| H | 4.5136  | -2.0571 | -2.1463 | H | -3.8067 | -2.2706 | 2.3238  |
| H | 5.5701  | -2.6626 | -0.8859 | H | -5.0481 | -2.9193 | 1.2705  |
| H | 1.5114  | 1.1095  | 0.0421  | H | -1.6469 | 1.3036  | -0.2063 |
| H | 2.5743  | 0.6505  | 1.3581  | H | -2.9207 | 0.8029  | -1.3021 |
| H | 3.3397  | 2.1192  | -1.2267 | H | -3.2514 | 2.046   | 1.4852  |
| H | 5.6287  | 2.2293  | -0.4724 | H | -5.648  | 1.9533  | 1.2308  |
| H | 5.264   | 1.3732  | 1.0153  | H | -5.5315 | 1.2161  | -0.3573 |
| H | 6.2921  | -0.155  | -0.5744 | H | -6.0489 | -0.4896 | 1.3001  |
| H | 5.1425  | 0.268   | -1.8219 | H | -4.7021 | -0.0104 | 2.3066  |
| H | 4.3458  | -0.5147 | 1.919   | H | -4.6547 | -0.5159 | -1.5664 |
| H | 4.2643  | -2.2419 | 1.5958  | H | -4.3582 | -2.2412 | -1.3876 |
| H | 5.7595  | -1.3894 | 1.3412  | H | -5.8311 | -1.5537 | -0.7686 |
| H | -5.6252 | 0.8478  | -2.2122 | H | 5.4744  | 2.4149  | 0.2261  |
| H | -7.1083 | 1.6197  | -1.6608 | H | 7.1948  | 2.0704  | 0.3733  |
| H | -7.0123 | -0.8246 | -1.1862 | H | 5.8641  | 1.3762  | 2.3595  |
| H | -7.2909 | 0.1471  | 0.2609  | H | 6.7901  | 0.047   | 1.6578  |
| H | -5.1682 | 3.0033  | -1.0351 | H | 6.3977  | 1.3939  | -1.8581 |
| H | -6.015  | 2.4067  | 0.3792  | H | 6.9605  | 0.0173  | -0.9306 |
| H | -2.5985 | -0.1793 | 1.8318  | H | 2.8799  | -1.9582 | -0.6514 |
| H | -2.9849 | -1.7162 | 1.1195  | H | 2.3046  | -1.3444 | 0.8638  |
| H | -2.1017 | -1.069  | -1.0614 | H | 1.6555  | 0.8131  | -0.1435 |



|              |                  |                  |                  |              |                  |                  |                  |
|--------------|------------------|------------------|------------------|--------------|------------------|------------------|------------------|
| H            | -1.1574          | 1.5541           | 0.2018           | H            | 2.4517           | -0.3443          | -2.8572          |
| H            | -0.9338          | 1.044            | -1.4591          | H            | 1.7615           | 1.2366           | -2.5332          |
| H            | -2.7819          | 2.6742           | -1.2242          | H            | 4.2145           | 1.3274           | -2.8829          |
| H            | -3.2849          | 1.1545           | -1.946           | H            | 3.7183           | 1.9615           | -1.3219          |
| H            | -2.7145          | 2.0086           | 1.751            | H            | 4.1696           | -1.6958          | -2.4092          |
| H            | -3.6457          | 3.3513           | 1.1031           | H            | 5.582            | -0.8479          | -3.0234          |
| H            | -4.4305          | 2.1374           | 2.1252           | H            | 5.7187           | -1.8845          | -1.5948          |
| H            | -4.7123          | -2.6563          | 1.0676           | H            | 3.1964           | -1.1676          | 2.5998           |
| H            | 1.7618           | -0.0251          | -2.0534          | H            | -1.3489          | 0.0704           | 1.8073           |
| H            | 3.5983           | 4.7291           | 2.0135           | H            | -4.4313          | 4.7725           | -1.4425          |
| H            | 4.8116           | 3.3543           | 1.9275           | H            | -5.4585          | 3.267            | -1.2212          |
| H            | -0.5513          | -1.474           | 2.3839           | H            | 0.1232           | -0.9953          | -3.1032          |
| H            | 1.7556           | 4.9035           | 0.6546           | H            | -2.3769          | 5.0826           | -0.4595          |
| <b>1d-13</b> | <b>X axis(Å)</b> | <b>Y axis(Å)</b> | <b>Z axis(Å)</b> | <b>1d-14</b> | <b>X axis(Å)</b> | <b>Y axis(Å)</b> | <b>Z axis(Å)</b> |
| C            | 3.8535           | -3.052           | -0.5808          | C            | -2.5894          | -3.5967          | 0.7199           |
| C            | 2.3303           | -3.032           | -0.4723          | C            | -1.2604          | -2.856           | 0.6019           |
| C            | 1.7695           | -1.73            | 0.1165           | C            | -1.3558          | -1.5098          | -0.1312          |
| C            | 2.3838           | -0.4707          | -0.5604          | C            | -2.5445          | -0.6442          | 0.3721           |
| C            | 3.9486           | -0.4783          | -0.6201          | C            | -3.9106          | -1.4088          | 0.4415           |
| C            | 4.4215           | -1.806           | -1.2697          | C            | -3.7183          | -2.7123          | 1.26             |
| C            | 1.8456           | 0.8719           | -0.019           | C            | -2.6997          | 0.7077           | -0.3608          |
| C            | 2.3734           | 2.0794           | -0.8273          | C            | -3.7819          | 1.6088           | 0.2893           |
| C            | 3.9026           | 2.0665           | -0.9903          | C            | -5.1153          | 0.861            | 0.4745           |
| C            | 4.4202           | 0.7158           | -1.5011          | C            | -4.9462          | -0.499           | 1.1622           |
| C            | 4.6446           | -0.3307          | 0.7548           | C            | -4.5191          | -1.7852          | -0.932           |
| O            | 0.3279           | -1.7214          | -0.1885          | O            | -0.1171          | -0.7808          | 0.1975           |
| C            | 1.8511           | 3.3952           | -0.2862          | C            | -4.0143          | 2.9248           | -0.4369          |
| C            | -6.4742          | 0.5049           | -0.7073          | C            | 6.9804           | 1.0281           | 0.2573           |
| C            | -5.7816          | 1.5511           | 0.1575           | C            | 6.2134           | 0.7988           | 1.5529           |
| C            | -4.2996          | 1.3266           | 0.303            | C            | 4.8748           | 0.1203           | 1.3657           |
| C            | -3.6751          | 0.1609           | 0.0128           | C            | 4.2559           | -0.0062          | 0.1652           |
| C            | -4.4524          | -1.0536          | -0.5253          | C            | 4.8789           | 0.5796           | -1.1196          |
| C            | -5.9877          | -0.8905          | -0.3419          | C            | 6.0465           | 1.5592           | -0.8167          |
| C            | -2.1774          | -0.0617          | 0.1667           | C            | 2.9281           | -0.7192          | -0.065           |
| C            | -1.8402          | -1.3528          | 0.936            | C            | 1.907            | 0.1495           | -0.8264          |
| C            | -2.5318          | -2.5679          | 0.3094           | C            | 2.5091           | 0.6367           | -2.1526          |
| C            | -4.0415          | -2.3461          | 0.2289           | C            | 3.8181           | 1.3871           | -1.9144          |
| C            | -4.1488          | -1.2104          | -2.0343          | C            | 5.4216           | -0.5773          | -1.992           |
| C            | -3.577           | 2.5515           | 0.7648           | C            | 4.3161           | -0.4145          | 2.6487           |
| O            | -2.4974          | 2.9215           | 0.3221           | O            | 4.8602           | -0.2315          | 3.7328           |
| C            | -0.3491          | -1.553           | 1.0134           | C            | 0.5968           | -0.5902          | -0.9805          |
| C            | 1.7309           | -1.7533          | 1.6331           | C            | -1.2025          | -1.6497          | -1.6329          |
| O            | 1.92             | -0.5219          | -1.9478          | O            | -2.2024          | -0.294           | 1.7472           |
| C            | 1.0364           | 4.2022           | -0.9863          | C            | -3.8144          | 3.1733           | -1.7421          |
| O            | 2.6596           | -1.9466          | 2.4016           | O            | -1.9609          | -2.1988          | -2.4157          |
| C            | 0.3751           | -1.562           | 2.1274           | C            | 0.0392           | -1.0472          | -2.097           |
| C            | 2.2114           | 3.8429           | 1.0868           | C            | -4.4945          | 4.0773           | 0.3835           |

|              |                  |                  |                  |              |                  |                  |                  |
|--------------|------------------|------------------|------------------|--------------|------------------|------------------|------------------|
| O            | 2.9303           | 3.1974           | 1.8392           | O            | -4.7003          | 4.0011           | 1.5881           |
| H            | 4.2911           | -3.1684          | 0.4162           | H            | -2.863           | -4.016           | -0.2538          |
| H            | 4.1588           | -3.9409          | -1.1461          | H            | -2.4604          | -4.4561          | 1.3889           |
| H            | 1.904            | -3.1928          | -1.4718          | H            | -0.8625          | -2.6901          | 1.6124           |
| H            | 1.9994           | -3.8937          | 0.1217           | H            | -0.5276          | -3.5084          | 0.1097           |
| H            | 4.1281           | -1.8318          | -2.3273          | H            | -3.4992          | -2.4702          | 2.3081           |
| H            | 5.5176           | -1.861           | -1.2598          | H            | -4.6506          | -3.2911          | 1.2728           |
| H            | 0.7513           | 0.891            | -0.0926          | H            | -1.751           | 1.2594           | -0.3289          |
| H            | 2.0864           | 0.9717           | 1.0434           | H            | -2.9242          | 0.528            | -1.4165          |
| H            | 1.9671           | 1.9717           | -1.8442          | H            | -3.4031          | 1.859            | 1.2903           |
| H            | 4.2024           | 2.8492           | -1.699           | H            | -5.804           | 1.4674           | 1.0763           |
| H            | 4.4016           | 2.3107           | -0.0465          | H            | -5.6077          | 0.7247           | -0.4964          |
| H            | 5.5166           | 0.7473           | -1.5439          | H            | -5.9228          | -0.9979          | 1.2096           |
| H            | 4.0886           | 0.5803           | -2.5386          | H            | -4.6502          | -0.3322          | 2.2058           |
| H            | 4.2185           | 0.4718           | 1.3621           | H            | -4.5186          | -0.9534          | -1.6407          |
| H            | 4.6147           | -1.2432          | 1.3486           | H            | -4.0128          | -2.6237          | -1.4087          |
| H            | 5.7098           | -0.1029          | 0.6241           | H            | -5.5625          | -2.104           | -0.815           |
| H            | -7.5589          | 0.5714           | -0.564           | H            | 7.7925           | 1.7428           | 0.434            |
| H            | -6.2871          | 0.7104           | -1.7674          | H            | 7.453            | 0.0952           | -0.0703          |
| H            | -6.2309          | 1.5486           | 1.1589           | H            | 6.0436           | 1.7643           | 2.0469           |
| H            | -5.9757          | 2.54             | -0.2759          | H            | 6.8542           | 0.2065           | 2.2176           |
| H            | -6.2653          | -1.0839          | 0.7035           | H            | 5.6514           | 2.5265           | -0.4769          |
| H            | -6.5253          | -1.6351          | -0.9424          | H            | 6.6178           | 1.768            | -1.73            |
| H            | -1.7275          | -0.0819          | -0.8343          | H            | 3.1219           | -1.6433          | -0.6253          |
| H            | -1.6952          | 0.7623           | 0.6999           | H            | 2.4663           | -1.0436          | 0.8691           |
| H            | -2.228           | -1.2406          | 1.9593           | H            | 1.6957           | 1.0412           | -0.2178          |
| H            | -2.13            | -2.7766          | -0.6892          | H            | 2.6851           | -0.2035          | -2.8347          |
| H            | -2.3347          | -3.4626          | 0.9136           | H            | 1.8046           | 1.3086           | -2.6592          |
| H            | -4.5055          | -3.221           | -0.2445          | H            | 4.2312           | 1.6981           | -2.8826          |
| H            | -4.4299          | -2.3122          | 1.2562           | H            | 3.5779           | 2.3127           | -1.3728          |
| H            | -3.0885          | -1.3989          | -2.2306          | H            | 4.6332           | -1.2611          | -2.3212          |
| H            | -4.7097          | -2.0494          | -2.4619          | H            | 5.9086           | -0.1919          | -2.8953          |
| H            | -4.4187          | -0.3106          | -2.598           | H            | 6.158            | -1.1814          | -1.4509          |
| H            | -4.1188          | 3.1413           | 1.5239           | H            | 3.3834           | -0.9882          | 2.5916           |
| H            | 0.9587           | -0.6952          | -1.9119          | H            | -1.2834          | 0.037            | 1.7388           |
| H            | 0.6477           | 5.1351           | -0.5895          | H            | -3.9983          | 4.1486           | -2.1844          |
| H            | 0.7133           | 3.9367           | -1.989           | H            | -3.4728          | 2.4059           | -2.4283          |
| H            | 0.0886           | -1.4579          | 3.1562           | H            | 0.3699           | -1.0223          | -3.1179          |
| H            | 1.7851           | 4.8103           | 1.4025           | H            | -4.6573          | 5.022            | -0.1625          |
| <b>1d-15</b> | <b>X axis(Å)</b> | <b>Y axis(Å)</b> | <b>Z axis(Å)</b> | <b>1d-16</b> | <b>X axis(Å)</b> | <b>Y axis(Å)</b> | <b>Z axis(Å)</b> |
| C            | -2.8894          | -3.5491          | 0.0143           | C            | 3.1662           | -3.6208          | -0.826           |
| C            | -1.4875          | -2.9457          | 0.038            | C            | 1.7768           | -3.019           | -1.017           |
| C            | -1.4493          | -1.4501          | -0.3086          | C            | 1.5506           | -1.7091          | -0.2485          |
| C            | -2.5143          | -0.6372          | 0.4812           | C            | 2.7265           | -0.7077          | -0.4252          |
| C            | -3.9584          | -1.2407          | 0.4095           | C            | 4.1422           | -1.3319          | -0.1786          |
| C            | -3.9032          | -2.7348          | 0.825            | C            | 4.2913           | -2.6053          | -1.0517          |
| C            | -2.5169          | 0.8776           | 0.1754           | C            | 2.5576           | 0.6148           | 0.3568           |

|   |         |         |         |   |         |         |         |
|---|---------|---------|---------|---|---------|---------|---------|
| C | -3.4918 | 1.6538  | 1.0934  | C | 3.6624  | 1.6475  | 0.013   |
| C | -4.9009 | 1.0373  | 1.1313  | C | 5.0728  | 1.0426  | 0.1395  |
| C | -4.8704 | -0.4702 | 1.4078  | C | 5.2185  | -0.2916 | -0.6019 |
| C | -4.6283 | -1.1452 | -0.983  | C | 4.4384  | -1.7157 | 1.2922  |
| O | -0.1264 | -0.9626 | 0.1216  | O | 0.3583  | -1.0858 | -0.8494 |
| C | -3.5246 | 3.1379  | 0.7837  | C | 3.5728  | 2.9414  | 0.8071  |
| C | 6.2684  | 1.6785  | 0.6062  | C | -6.745  | 1.7386  | -0.3472 |
| C | 6.0537  | 0.5282  | 1.582   | C | -6.8408 | 0.2187  | -0.3663 |
| C | 4.826   | -0.2888 | 1.257   | C | -5.5761 | -0.4838 | 0.0742  |
| C | 4.2347  | -0.2806 | 0.0373  | C | -4.3724 | 0.1317  | 0.1841  |
| C | 4.8481  | 0.4821  | -1.156  | C | -4.2012 | 1.6227  | -0.1785 |
| C | 6.206   | 1.1598  | -0.8195 | C | -5.4254 | 2.1869  | -0.9517 |
| C | 2.885   | -0.9076 | -0.2841 | C | -3.0881 | -0.5304 | 0.6687  |
| C | 1.8747  | 0.1754  | -0.7249 | C | -1.9125 | -0.3392 | -0.3109 |
| C | 2.4322  | 1.0093  | -1.8942 | C | -1.6893 | 1.154   | -0.5889 |
| C | 3.8285  | 1.5665  | -1.5914 | C | -2.9675 | 1.8154  | -1.0998 |
| C | 5.1377  | -0.4778 | -2.3364 | C | -4.0195 | 2.4438  | 1.1202  |
| C | 4.3032  | -1.0679 | 2.423   | C | -5.8012 | -1.9294 | 0.3949  |
| O | 4.7928  | -0.9914 | 3.5448  | O | -6.8845 | -2.4819 | 0.2345  |
| C | 0.5213  | -0.4422 | -0.9953 | C | -0.6156 | -0.9752 | 0.137   |
| C | -1.3622 | -1.2076 | -1.8019 | C | 1.0568  | -1.9387 | 1.1661  |
| O | -2.1008 | -0.7284 | 1.882   | O | 2.6884  | -0.3223 | -1.8328 |
| C | -3.1423 | 4.0785  | 1.6638  | C | 3.0502  | 3.1006  | 2.0345  |
| O | -2.1542 | -1.5538 | -2.6636 | O | 1.6505  | -2.4715 | 2.0899  |
| C | -0.1267 | -0.5224 | -2.1534 | C | -0.3042 | -1.4498 | 1.3388  |
| C | -3.9995 | 3.6201  | -0.5427 | C | 4.099   | 4.1773  | 0.1534  |
| O | -4.3382 | 2.8703  | -1.4491 | O | 4.5816  | 4.1853  | -0.972  |
| H | -3.2261 | -3.655  | -1.0222 | H | 3.2412  | -4.0603 | 0.174   |
| H | -2.8462 | -4.5674 | 0.4193  | H | 3.2934  | -4.4539 | -1.5279 |
| H | -1.0561 | -3.0984 | 1.0367  | H | 1.6179  | -2.8415 | -2.0894 |
| H | -0.8394 | -3.5126 | -0.6429 | H | 1.0206  | -3.7631 | -0.7351 |
| H | -3.6439 | -2.8194 | 1.8885  | H | 4.3059  | -2.3332 | -2.1152 |
| H | -4.8951 | -3.1925 | 0.7193  | H | 5.2554  | -3.0898 | -0.8511 |
| H | -1.5137 | 1.2923  | 0.3412  | H | 1.5924  | 1.0746  | 0.1076  |
| H | -2.7495 | 1.0454  | -0.88   | H | 2.539   | 0.4054  | 1.4306  |
| H | -3.0969 | 1.5523  | 2.1155  | H | 3.5104  | 1.9092  | -1.0436 |
| H | -5.4939 | 1.5261  | 1.9152  | H | 5.33    | 0.9066  | 1.1974  |
| H | -5.436  | 1.2219  | 0.1936  | H | 5.817   | 1.7424  | -0.2615 |
| H | -5.8953 | -0.861  | 1.3669  | H | 6.2249  | -0.6909 | -0.4218 |
| H | -4.5338 | -0.6337 | 2.4396  | H | 5.1659  | -0.1025 | -1.6818 |
| H | -4.5235 | -0.1569 | -1.4374 | H | 4.1813  | -0.9234 | 1.9995  |
| H | -4.2437 | -1.8761 | -1.6932 | H | 3.9217  | -2.6203 | 1.6104  |
| H | -5.7034 | -1.3511 | -0.9078 | H | 5.5066  | -1.9283 | 1.4256  |
| H | 5.5122  | 2.4566  | 0.764   | H | -7.5806 | 2.1654  | -0.9139 |
| H | 7.2441  | 2.1415  | 0.7932  | H | -6.8437 | 2.1091  | 0.6795  |
| H | 5.9782  | 0.962   | 2.5863  | H | -7.0834 | -0.1147 | -1.3836 |
| H | 6.9289  | -0.1334 | 1.5804  | H | -7.6829 | -0.0689 | 0.2752  |

|              |                  |                  |                  |              |                  |                  |                  |
|--------------|------------------|------------------|------------------|--------------|------------------|------------------|------------------|
| H            | 6.4081           | 1.9808           | -1.5189          | H            | -5.3996          | 1.8536           | -1.9984          |
| H            | 7.0285           | 0.4427           | -0.9513          | H            | -5.3881          | 3.2831           | -0.981           |
| H            | 3.0049           | -1.6673          | -1.0656          | H            | -2.8376          | -0.1062          | 1.6495           |
| H            | 2.4625           | -1.4448          | 0.5671           | H            | -3.2093          | -1.6019          | 0.8377           |
| H            | 1.7368           | 0.8684           | 0.1189           | H            | -2.1949          | -0.8263          | -1.2559          |
| H            | 2.4741           | 0.4101           | -2.8113          | H            | -1.3352          | 1.6643           | 0.3153           |
| H            | 1.7572           | 1.8485           | -2.1055          | H            | -0.903           | 1.2865           | -1.3431          |
| H            | 4.1953           | 2.0937           | -2.4815          | H            | -2.7773          | 2.8855           | -1.2534          |
| H            | 3.731            | 2.3251           | -0.8036          | H            | -3.1824          | 1.3978           | -2.0933          |
| H            | 4.2403           | -0.9544          | -2.7398          | H            | -3.1137          | 2.1674           | 1.6687           |
| H            | 5.612            | 0.0597           | -3.1663          | H            | -3.9445          | 3.515            | 0.8997           |
| H            | 5.8173           | -1.282           | -2.0296          | H            | -4.8611          | 2.3054           | 1.8077           |
| H            | 3.4579           | -1.7419          | 2.2358           | H            | -4.9482          | -2.4965          | 0.7861           |
| H            | -1.1402          | -0.5511          | 1.9024           | H            | 1.7593           | -0.1068          | -2.0453          |
| H            | -3.1698          | 5.1407           | 1.4399           | H            | 3.0175           | 4.0654           | 2.5334           |
| H            | -2.7879          | 3.8052           | 2.6542           | H            | 2.6474           | 2.2678           | 2.6008           |
| H            | 0.1408           | -0.2043          | -3.1429          | H            | -0.8641          | -1.4961          | 2.2533           |
| H            | -4.0252          | 4.7153           | -0.6736          | H            | 4.0283           | 5.1038           | 0.7482           |
| <b>1d-17</b> | <b>X axis(Å)</b> | <b>Y axis(Å)</b> | <b>Z axis(Å)</b> | <b>1d-18</b> | <b>X axis(Å)</b> | <b>Y axis(Å)</b> | <b>Z axis(Å)</b> |
| C            | 3.3284           | -3.5241          | -0.599           | C            | 3.3384           | -2.9046          | -1.3427          |
| C            | 1.8929           | -3.0456          | -0.8004          | C            | 2.6499           | -2.9408          | 0.0171           |
| C            | 1.6113           | -1.6585          | -0.2049          | C            | 1.9729           | -1.6095          | 0.3782           |
| C            | 2.6987           | -0.6183          | -0.5991          | C            | 2.5585           | -0.3734          | -0.377           |
| C            | 4.1661           | -1.1034          | -0.3422          | C            | 4.0885           | -0.4976          | -0.6525          |
| C            | 4.3692           | -2.4827          | -1.0234          | C            | 4.3764           | -1.7828          | -1.4892          |
| C            | 2.4631           | 0.7994           | -0.031           | C            | 2.1916           | 0.9787           | 0.2776           |
| C            | 3.4914           | 1.8212           | -0.5729          | C            | 2.6725           | 2.1895           | -0.5515          |
| C            | 4.9464           | 1.3425           | -0.4298          | C            | 4.1879           | 2.0764           | -0.8126          |
| C            | 5.149            | -0.0759          | -0.9746          | C            | 4.5646           | 0.7422           | -1.466           |
| C            | 4.5477           | -1.2355          | 1.1525           | C            | 4.9365           | -0.5683          | 0.6402           |
| O            | 0.3433           | -1.2042          | -0.8023          | O            | 0.5544           | -1.7006          | 0.0131           |
| C            | 3.2868           | 3.2107           | -8.00E-04        | C            | 2.2321           | 3.4936           | 0.0966           |
| C            | -6.3083          | 1.169            | -1.3865          | C            | -6.3212          | 0.1178           | -0.9449          |
| C            | -6.6577          | 6.00E-04         | -0.4731          | C            | -5.7199          | 1.2594           | -0.1349          |
| C            | -5.4502          | -0.5655          | 0.2355           | C            | -4.2314          | 1.1325           | 0.0885           |
| C            | -4.2911          | 0.1214           | 0.3834           | C            | -3.5363          | -0.0165          | -0.099           |
| C            | -4.1569          | 1.5925           | -0.0649          | C            | -4.2351          | -1.3089          | -0.5704          |
| C            | -5.4803          | 2.1872           | -0.6228          | C            | -5.782           | -1.216           | -0.4545          |
| C            | -2.9843          | -0.4642          | 0.8985           | C            | -2.0359          | -0.1658          | 0.1142           |
| C            | -1.893           | -0.4022          | -0.1948          | C            | -1.679           | -1.3692          | 1.0089           |
| C            | -1.7294          | 1.0285           | -0.7398          | C            | -2.2833          | -2.6625          | 0.4549           |
| C            | -3.0661          | 1.6471           | -1.165           | C            | -3.7959          | -2.5211          | 0.2955           |
| C            | -3.7547          | 2.5016           | 1.1227           | C            | -3.8655          | -1.5647          | -2.051           |
| C            | -5.6463          | -1.9695          | 0.715            | C            | -3.5943          | 2.4211           | 0.5091           |
| O            | -6.6772          | -2.6019          | 0.5123           | O            | -4.252           | 3.3863           | 0.8859           |
| C            | -0.5483          | -0.9439          | 0.2345           | C            | -0.1858          | -1.486           | 1.1693           |
| C            | 1.2183           | -1.7284          | 1.257            | C            | 1.8724           | -1.4539          | 1.8852           |

|              |                  |                  |                  |   |         |         |         |
|--------------|------------------|------------------|------------------|---|---------|---------|---------|
| O            | 2.5658           | -0.4584          | -2.0479          | O | 1.9233  | -0.3339 | -1.6892 |
| C            | 2.9657           | 4.2741           | -0.7568          | C | 3.0172  | 4.4015  | 0.6998  |
| O            | 1.8677           | -2.1815          | 2.1857           | O | 2.7942  | -1.3899 | 2.6845  |
| C            | -0.1293          | -1.2178          | 1.466            | C | 0.4835  | -1.3631 | 2.3114  |
| C            | 3.4435           | 3.4543           | 1.4598           | C | 0.7769  | 3.832   | 0.0264  |
| O            | 3.69             | 2.5676           | 2.2669           | O | -0.0641 | 3.0774  | -0.4493 |
| H            | 3.4773           | -3.8083          | 0.4479           | H | 3.8226  | -3.8691 | -1.537  |
| H            | 3.4839           | -4.4401          | -1.1817          | H | 2.5753  | -2.7945 | -2.1236 |
| H            | 1.6759           | -3.0296          | -1.8772          | H | 1.9117  | -3.7529 | 0.0137  |
| H            | 1.2029           | -3.789           | -0.3808          | H | 3.3971  | -3.2144 | 0.7714  |
| H            | 4.3238           | -2.3727          | -2.1148          | H | 4.4433  | -1.5413 | -2.5581 |
| H            | 5.3721           | -2.8691          | -0.8008          | H | 5.3654  | -2.1809 | -1.2266 |
| H            | 1.4671           | 1.1565           | -0.3229          | H | 2.6038  | 1.0489  | 1.2909  |
| H            | 2.4726           | 0.7702           | 1.0623           | H | 1.1022  | 1.0341  | 0.3801  |
| H            | 3.3092           | 1.8948           | -1.6556          | H | 2.1867  | 2.1562  | -1.5371 |
| H            | 5.6122           | 2.0257           | -0.9727          | H | 4.5115  | 2.8928  | -1.4705 |
| H            | 5.2707           | 1.378            | 0.6159           | H | 4.7508  | 2.1868  | 0.1215  |
| H            | 6.1877           | -0.3819          | -0.7947          | H | 5.6526  | 0.7068  | -1.6069 |
| H            | 5.0327           | -0.0555          | -2.0659          | H | 4.1316  | 0.7213  | -2.4748 |
| H            | 4.2439           | -0.3697          | 1.7461           | H | 4.6961  | 0.231   | 1.3461  |
| H            | 4.1258           | -2.1218          | 1.6245           | H | 4.8171  | -1.5205 | 1.1618  |
| H            | 5.6345           | -1.3358          | 1.2647           | H | 6.0049  | -0.4802 | 0.408   |
| H            | -5.7603          | 0.8123           | -2.2666          | H | -7.4131 | 0.1372  | -0.8501 |
| H            | -7.2293          | 1.6361           | -1.7539          | H | -6.0989 | 0.2542  | -2.0093 |
| H            | -7.1398          | -0.7652          | -1.0925          | H | -6.2131 | 1.3067  | 0.8445  |
| H            | -7.3914          | 0.3184           | 0.2781           | H | -5.9509 | 2.1966  | -0.6561 |
| H            | -5.2705          | 3.0494           | -1.2684          | H | -6.0912 | -1.3436 | 0.5922  |
| H            | -6.098           | 2.5711           | 0.2013           | H | -6.2571 | -2.0319 | -1.0137 |
| H            | -2.6749          | 0.0808           | 1.7977           | H | -1.5569 | -0.2632 | -0.8686 |
| H            | -3.0844          | -1.5044          | 1.2148           | H | -1.5916 | 0.7206  | 0.5725  |
| H            | -2.2378          | -1.0372          | -1.0247          | H | -2.1208 | -1.1906 | 2.0003  |
| H            | -1.2472          | 1.6669           | 0.0109           | H | -1.8282 | -2.9283 | -0.5067 |
| H            | -1.0576          | 1.0243           | -1.6079          | H | -2.0724 | -3.4962 | 1.1366  |
| H            | -2.8891          | 2.6864           | -1.4701          | H | -4.1978 | -3.4505 | -0.1281 |
| H            | -3.4156          | 1.1195           | -2.0623          | H | -4.2299 | -2.4308 | 1.301   |
| H            | -2.7766          | 2.2568           | 1.5457           | H | -2.7921 | -1.7248 | -2.1932 |
| H            | -3.7103          | 3.5517           | 0.81             | H | -4.3764 | -2.4555 | -2.4346 |
| H            | -4.4851          | 2.428            | 1.9374           | H | -4.1467 | -0.7209 | -2.6906 |
| H            | -4.8257          | -2.4225          | 1.2851           | H | -2.4994 | 2.4751  | 0.4681  |
| H            | 1.609            | -0.3844          | -2.2338          | H | 0.9705  | -0.4977 | -1.5455 |
| H            | 2.8231           | 5.2685           | -0.3442          | H | 2.6261  | 5.3203  | 1.1282  |
| H            | 2.8388           | 4.1769           | -1.8317          | H | 4.0893  | 4.2618  | 0.7938  |
| H            | -0.6112          | -1.1278          | 2.4207           | H | 0.1404  | -1.1858 | 3.3127  |
| H            | 3.3158           | 4.4999           | 1.788            | H | 0.4899  | 4.812   | 0.4444  |
| <b>1d-19</b> | <b>X axis(Å)</b> | <b>Y axis(Å)</b> | <b>Z axis(Å)</b> |   |         |         |         |
| C            | 3.648            | -3.2851          | -0.4709          |   |         |         |         |
| C            | 2.1361           | -3.0764          | -0.4643          |   |         |         |         |

|   |         |         |         |
|---|---------|---------|---------|
| C | 1.6896  | -1.7582 | 0.1841  |
| C | 2.5153  | -0.5413 | -0.32   |
| C | 4.0664  | -0.7553 | -0.2748 |
| C | 4.4148  | -2.0742 | -1.0135 |
| C | 2.1194  | 0.8056  | 0.3269  |
| C | 2.8422  | 2.0092  | -0.3312 |
| C | 4.3652  | 1.7945  | -0.4027 |
| C | 4.7484  | 0.4372  | -1.0047 |
| C | 4.6745  | -0.8217 | 1.1478  |
| O | 0.2974  | -1.541  | -0.25   |
| C | 2.5292  | 3.3503  | 0.314   |
| C | -6.5736 | -0.0586 | -0.086  |
| C | -5.9708 | 1.2984  | 0.2569  |
| C | -4.4637 | 1.2621  | 0.3339  |
| C | -3.7179 | 0.2789  | -0.2258 |
| C | -4.3519 | -0.8211 | -1.1048 |
| C | -5.8816 | -0.6342 | -1.3094 |
| C | -2.2289 | 0.0717  | 0.0084  |
| C | -1.9747 | -1.2954 | 0.6784  |
| C | -2.6097 | -2.4483 | -0.1151 |
| C | -4.0898 | -2.1867 | -0.4172 |
| C | -3.732  | -0.8178 | -2.5241 |
| C | -3.8754 | 2.3904  | 1.1201  |
| O | -4.5589 | 3.196   | 1.7422  |
| C | -0.5012 | -1.5302 | 0.8846  |
| C | 1.498   | -1.8794 | 1.6847  |
| O | 2.1625  | -0.4014 | -1.73   |
| C | 2.1779  | 3.5685  | 1.5923  |
| O | 2.3478  | -2.1013 | 2.5321  |
| C | 0.0995  | -1.7152 | 2.0547  |
| C | 2.5945  | 4.5576  | -0.5635 |
| O | 2.8747  | 4.5035  | -1.7543 |
| H | 3.9882  | -3.5326 | 0.5399  |
| H | 3.8843  | -4.1607 | -1.0877 |
| H | 1.7742  | -3.1108 | -1.501  |
| H | 1.6572  | -3.929  | 0.0343  |
| H | 4.1952  | -1.9752 | -2.0846 |
| H | 5.4919  | -2.2727 | -0.9436 |
| H | 1.0402  | 0.971   | 0.2126  |
| H | 2.3206  | 0.7688  | 1.4018  |
| H | 2.4681  | 2.0559  | -1.3636 |
| H | 4.8257  | 2.5835  | -1.0108 |
| H | 4.806   | 1.892   | 0.5973  |
| H | 5.8403  | 0.3288  | -0.9722 |
| H | 4.4844  | 0.4368  | -2.0701 |
| H | 4.3243  | -0.0169 | 1.7989  |
| H | 4.4747  | -1.765  | 1.6547  |

|   |         |         |         |
|---|---------|---------|---------|
| H | 5.7679  | -0.742  | 1.1018  |
| H | -6.4772 | -0.7427 | 0.7654  |
| H | -7.646  | 0.055   | -0.282  |
| H | -6.4019 | 1.616   | 1.2138  |
| H | -6.2682 | 2.0408  | -0.4942 |
| H | -6.3507 | -1.5877 | -1.5829 |
| H | -6.0692 | 0.0464  | -2.1518 |
| H | -1.6941 | 0.1528  | -0.9452 |
| H | -1.7895 | 0.8413  | 0.647   |
| H | -2.4612 | -1.2729 | 1.6651  |
| H | -2.0672 | -2.618  | -1.053  |
| H | -2.5242 | -3.3817 | 0.4561  |
| H | -4.469  | -3.0042 | -1.0438 |
| H | -4.6465 | -2.2406 | 0.5277  |
| H | -2.6609 | -1.0376 | -2.5305 |
| H | -4.2144 | -1.5695 | -3.1602 |
| H | -3.862  | 0.1585  | -3.0063 |
| H | -2.7824 | 2.4892  | 1.1068  |
| H | 1.1896  | -0.4636 | -1.7899 |
| H | 1.9623  | 4.5622  | 1.976   |
| H | 2.1082  | 2.7634  | 2.3159  |
| H | -0.2967 | -1.7497 | 3.0518  |
| H | 2.3708  | 5.521   | -0.0746 |

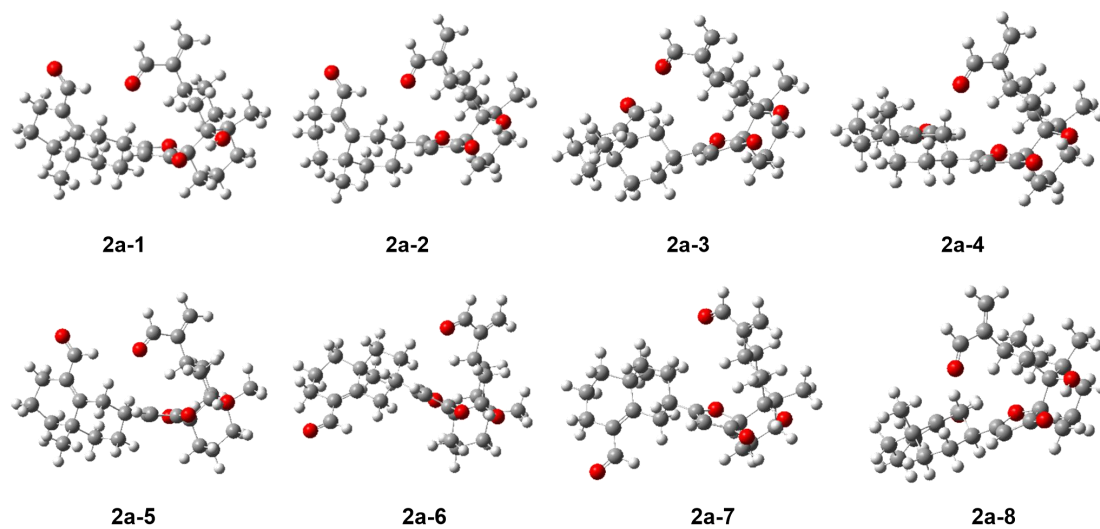

**Figure S11.** Optimized geometries of predominant conformers for **2a** at the B3LYP/6-31G (d,p) level

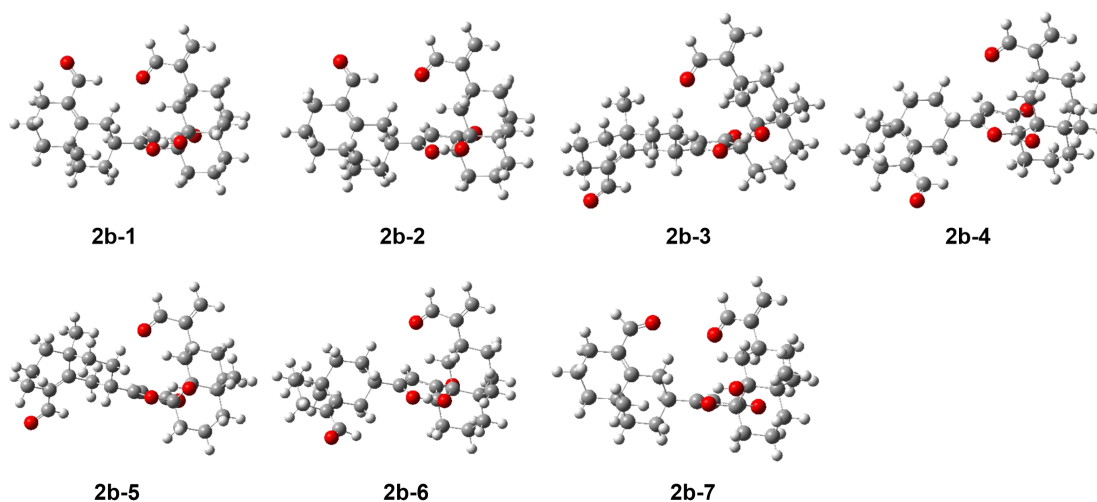

**Figure S12.** Optimized geometries of predominant conformers for **2b** at the B3LYP/6-31G (d,p) level

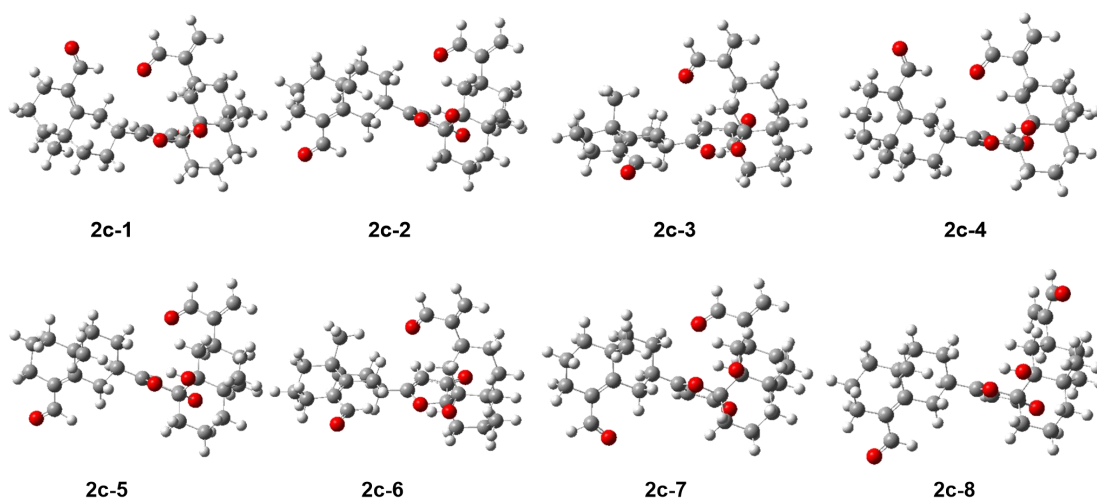

**Figure S13.** Optimized geometries of predominant conformers for **2c** at the B3LYP/6-31G (d,p) level

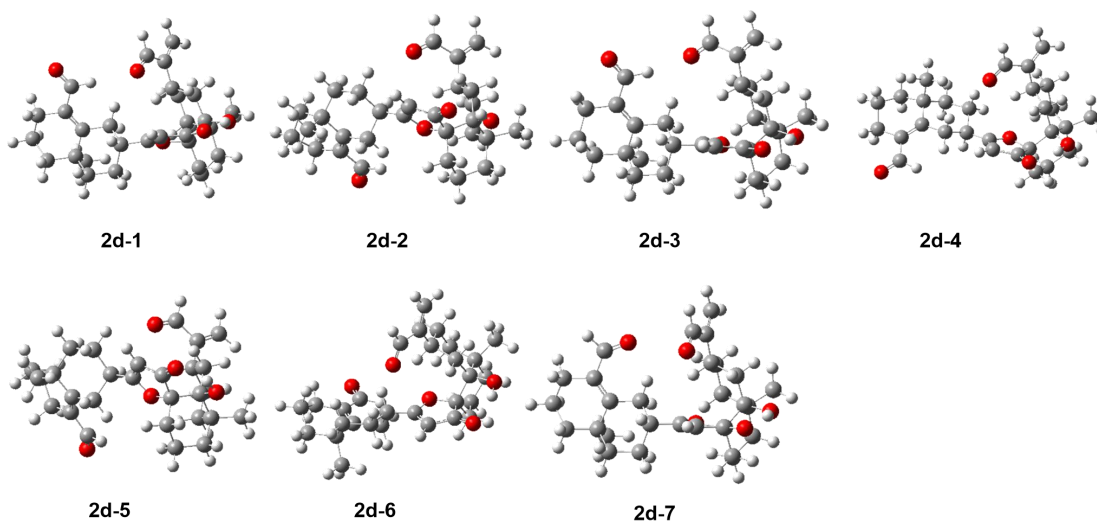



**Figure S14.** Optimized geometries of predominant conformers for **2d** at the B3LYP/6-31G (d,p) level

**Table S4.** Conformational analysis of the optimized **2a-2d** at the B3LYP/6-31G(d,p) level in the gas phase

|           | <i>Conformers</i> | G (Hartree) | $\Delta G$ (Kcal/mol) | Population |
|-----------|-------------------|-------------|-----------------------|------------|
| <b>2a</b> | 2a-1              | -1503.56707 | 0                     | 32.74%     |
|           | 2a-2              | -1503.56598 | 0.68210337            | 10.31%     |
|           | 2a-3              | -1503.56436 | 1.70180712            | 1.84%      |
|           | 2a-4              | -1503.56542 | 1.03664652            | 5.67%      |
|           | 2a-5              | -1503.56707 | -0.00062751           | 32.67%     |
|           | 2a-6              | -1503.56551 | 0.98079813            | 6.23%      |
|           | 2a-7              | -1503.56588 | 0.74799192            | 9.23%      |
|           | 2a-8              | -1503.56404 | 1.90449285            | 1.31%      |
|           | <i>Conformers</i> | G (Hartree) | $\Delta G$ (Kcal/mol) | Population |
| <b>2b</b> | 2b-1              | -1503.55999 | 0                     | 32.74%     |
|           | 2b-2              | -1503.55862 | 0.85843368            | 7.68%      |
|           | 2b-3              | -1503.55957 | 0.26292669            | 21.00%     |
|           | 2b-4              | -1503.55968 | 0.19264557            | 23.65%     |
|           | 2b-5              | -1503.55742 | 1.61019066            | 2.16%      |
|           | 2b-6              | -1503.55907 | 0.58044675            | 12.29%     |
|           | 2b-7              | -1503.55599 | 2.51129502            | 0.47%      |
|           | <i>Conformers</i> | G (Hartree) | $\Delta G$ (Kcal/mol) | Population |
| <b>2c</b> | 2c-1              | -1503.55986 | 0                     | 29.73%     |
|           | 2c-2              | -1503.55983 | 0.0188253             | 28.80%     |
|           | 2c-3              | -1503.55888 | 0.60993972            | 10.61%     |
|           | 2c-4              | -1503.55820 | 1.03978407            | 5.14%      |
|           | 2c-5              | -1503.55883 | 0.64257024            | 10.05%     |
|           | 2c-6              | -1503.55751 | 1.47339348            | 2.47%      |
|           | 2c-7              | -1503.55761 | 1.40938746            | 2.75%      |
|           | 2c-8              | -1503.55887 | 0.61872486            | 10.46%     |
|           | <i>Conformers</i> | G (Hartree) | $\Delta G$ (Kcal/mol) | Population |
| <b>2d</b> | 2d-1              | -1503.56686 | 0.34262046            | 30.70%     |
|           | 2d-2              | -1503.56489 | 1.57944267            | 3.80%      |

|      |             |            |        |
|------|-------------|------------|--------|
| 2d-3 | -1503.56741 | 0          | 54.76% |
| 2d-4 | -1503.56425 | 1.98544164 | 1.92%  |
| 2d-5 | -1503.56492 | 1.56312741 | 3.91%  |
| 2d-6 | -1503.56511 | 1.44201798 | 4.80%  |
| 2d-7 | -1503.56162 | 3.63077286 | 0.12%  |

| Functional<br>mPW1PW91 |      | Solvent?<br>PCM |           | Basis Set<br>6-311+G(d, p) |           |           | Type of Data<br>Unscaled Shifts |  |
|------------------------|------|-----------------|-----------|----------------------------|-----------|-----------|---------------------------------|--|
|                        |      | DP4+            | 100.00%   | 0.00%                      | 0.00%     | 0.00%     | -                               |  |
| Nuclei                 | sp2? | Experimental    | Isomer 1  | Isomer 2                   | Isomer 3  | Isomer 4  | Isomer 5                        |  |
| C                      |      | 17.8            | 21.79144  | 19.32576                   | 19.66939  | 21.98157  |                                 |  |
| C                      |      | 32.4            | 36.58948  | 34.43455                   | 34.42308  | 36.88207  |                                 |  |
| C                      |      | 93              | 99.91618  | 101.66301                  | 101.97703 | 100.17876 |                                 |  |
| C                      |      | 74.5            | 81.14559  | 82.31426                   | 82.4668   | 81.04481  |                                 |  |
| C                      |      | 37.4            | 43.21026  | 45.35631                   | 45.59831  | 43.20041  |                                 |  |
| C                      |      | 35.9            | 38.50166  | 38.51452                   | 38.93547  | 38.65965  |                                 |  |
| C                      |      | 38.9            | 43.14244  | 38.8055                    | 38.55492  | 43.7994   |                                 |  |
| C                      |      | 31.9            | 36.3865   | 37.66566                   | 38.63409  | 35.79981  |                                 |  |
| C                      |      | 25.3            | 27.34715  | 26.76923                   | 27.0323   | 27.16     |                                 |  |
| C                      |      | 32.8            | 35.62858  | 34.08509                   | 34.25058  | 35.69729  |                                 |  |
| C                      |      | 23.3            | 23.84116  | 25.15494                   | 25.37836  | 23.918    |                                 |  |
| C                      | x    | 154.6           | 163.88979 | 163.52575                  | 163.70674 | 164.03568 |                                 |  |
| C                      |      | 17.8            | 21.30092  | 21.42837                   | 21.50497  | 21.32356  |                                 |  |
| C                      |      | 24              | 27.39453  | 27.39394                   | 27.77938  | 27.50378  |                                 |  |
| C                      | x    | 134.2           | 142.66947 | 142.37139                  | 142.5019  | 142.42689 |                                 |  |
| C                      | x    | 160.3           | 176.64615 | 177.13083                  | 177.32481 | 176.96322 |                                 |  |
| C                      |      | 36.7            | 43.05925  | 43.23182                   | 43.44446  | 43.08861  |                                 |  |
| C                      |      | 39.4            | 41.77093  | 41.76948                   | 41.82879  | 41.8151   |                                 |  |
| C                      |      | 26.3            | 29.4719   | 30.933                     | 30.17548  | 30.78609  |                                 |  |
| C                      |      | 41.8            | 47.60592  | 46.81796                   | 47.28239  | 47.52158  |                                 |  |
| C                      |      | 26              | 30.60885  | 27.86613                   | 29.42013  | 27.81382  |                                 |  |
| C                      |      | 40.8            | 44.53219  | 43.82744                   | 44.30614  | 44.10792  |                                 |  |
| C                      |      | 25.1            | 26.60765  | 26.68197                   | 26.72074  | 26.58974  |                                 |  |
| C                      | x    | 191.4           | 200.41716 | 198.92073                  | 199.03546 | 198.7145  |                                 |  |
| C                      | x    | 196.3           | 208.11332 | 201.88341                  | 202.35973 | 207.25919 |                                 |  |
| C                      | x    | 210.4           | 219.41183 | 213.34085                  | 213.50027 | 219.64035 |                                 |  |
| C                      | x    | 133             | 146.0152  | 146.04031                  | 146.3107  | 146.25945 |                                 |  |
| C                      | x    | 101.9           | 107.62434 | 111.57571                  | 111.53378 | 108.73719 |                                 |  |
| C                      | x    | 194.5           | 205.24959 | 205.48995                  | 205.51808 | 205.23919 |                                 |  |
| H                      | x    | 9.41            | 9.71641   | 9.73309                    | 9.7942    | 9.691     |                                 |  |
| H                      |      | 1.52            | 1.51809   | 1.41645                    | 1.53852   | 1.53592   |                                 |  |
| H                      |      | 1.79            | 1.93426   | 2.5383                     | 2.42015   | 1.98209   |                                 |  |
| H                      |      | 1.35            | 1.36654   | 1.57752                    | 1.60105   | 1.36473   |                                 |  |
| H                      |      | 2.15            | 2.20125   | 2.40978                    | 2.4085    | 2.20438   |                                 |  |
| H                      |      | 1.27            | 1.25451   | 1.28063                    | 1.28242   | 1.27747   |                                 |  |
| H                      |      | 1.91            | 2.03291   | 1.91482                    | 1.91218   | 2.04862   |                                 |  |
| H                      |      | 1.4             | 1.33293   | 1.97651                    | 1.88683   | 1.31196   |                                 |  |
| H                      |      | 1.47            | 1.33247   | 1.02179                    | 1.22796   | 1.28543   |                                 |  |
| H                      |      | 2.81            | 3.04076   | 2.54575                    | 2.56863   | 3.09366   |                                 |  |
| H                      |      | 1.51            | 1.33465   | 1.36476                    | 1.33528   | 1.30556   |                                 |  |
| H                      |      | 1.58            | 1.8547    | 1.75042                    | 1.86257   | 1.90232   |                                 |  |
| H                      |      | 1.16            | 1.18677   | 1.04153                    | 1.03465   | 1.22127   |                                 |  |
| H                      |      | 2.29            | 2.43402   | 3.33778                    | 3.33177   | 2.45305   |                                 |  |
| H                      |      | 1.06            | 1.45077   | 1.41834                    | 1.42851   | 1.44668   |                                 |  |
| H                      |      | 1.06            | 0.367     | 0.40756                    | 0.41724   | 0.37532   |                                 |  |
| H                      |      | 1.06            | 1.53041   | 1.54155                    | 1.58852   | 1.56977   |                                 |  |
| H                      |      | 1.54            | 1.62247   | 1.62749                    | 1.68298   | 1.66467   |                                 |  |
| H                      |      | 1.65            | 1.64976   | 1.64114                    | 1.63562   | 1.60762   |                                 |  |
| H                      |      | 2.39            | 2.59854   | 2.49463                    | 2.14845   | 2.08515   |                                 |  |
| H                      |      | 2.08            | 2.04023   | 2.19913                    | 2.54362   | 2.56605   |                                 |  |
| H                      |      | 1.61            | 1.60629   | 1.61851                    | 1.4387    | 1.41099   |                                 |  |
| H                      |      | 1.4             | 1.38965   | 1.43505                    | 1.66542   | 1.62226   |                                 |  |
| H                      |      | 3.92            | 4.53639   | 4.1444                     | 2.71652   | 2.40121   |                                 |  |
| H                      |      | 2.37            | 2.59932   | 2.48508                    | 4.01364   | 4.20716   |                                 |  |
| H                      |      | 2.73            | 2.7689    | 2.74135                    | 2.76665   | 2.97864   |                                 |  |
| H                      |      | 1.87            | 2.05322   | 2.04735                    | 2.07529   | 2.18147   |                                 |  |
| H                      |      | 2.06            | 2.03921   | 2.22164                    | 2.11197   | 2.28157   |                                 |  |
| H                      |      | 1.61            | 1.62106   | 1.65347                    | 1.85974   | 1.91614   |                                 |  |
| H                      |      | 1.78            | 1.89443   | 1.83729                    | 1.65604   | 1.65361   |                                 |  |
| H                      |      | 1.25            | 0.81848   | 0.82421                    | 1.66168   | 1.91519   |                                 |  |
| H                      |      | 1.25            | 1.95591   | 1.99862                    | 1.4671    | 0.80636   |                                 |  |
| H                      |      | 1.25            | 1.34313   | 1.25116                    | 0.91419   | 1.27245   |                                 |  |
| H                      | x    | 10.26           | 10.86402  | 10.71334                   | 10.73513  | 10.6126   |                                 |  |
| H                      |      | 5.09            | 5.5181    | 2.03546                    | 2.03308   | 5.50219   |                                 |  |
| H                      | x    | 5.93            | 6.48762   | 6.44414                    | 6.41283   | 6.48695   |                                 |  |
| H                      | x    | 6.22            | 6.81074   | 6.78455                    | 6.79859   | 6.85275   |                                 |  |
| H                      | x    | 5.59            | 5.76835   | 5.72117                    | 5.73777   | 5.74329   |                                 |  |

| Functional       | Solvent? |          | Basis Set    |          | Type of Data    |          |
|------------------|----------|----------|--------------|----------|-----------------|----------|
| mPW1PW91         | PCM      |          | 6-311+G(d,p) |          | Unscaled Shifts |          |
|                  | Isomer 1 | Isomer 2 | Isomer 3     | Isomer 4 | Isomer 5        | Isomer 6 |
| sDP4+ (H data)   | 100.00%  | 0.00%    | 0.00%        | 0.00%    | -               | -        |
| sDP4+ (C data)   | 90.64%   | 0.00%    | 0.00%        | 9.36%    | -               | -        |
| sDP4+ (all data) | 100.00%  | 0.00%    | 0.00%        | 0.00%    | -               | -        |
| uDP4+ (H data)   | 100.00%  | 0.00%    | 0.00%        | 0.00%    | -               | -        |
| uDP4+ (C data)   | 67.02%   | 0.00%    | 0.00%        | 32.98%   | -               | -        |
| uDP4+ (all data) | 100.00%  | 0.00%    | 0.00%        | 0.00%    | -               | -        |
| DP4+ (H data)    | 100.00%  | 0.00%    | 0.00%        | 0.00%    | -               | -        |
| DP4+ (C data)    | 95.16%   | 0.00%    | 0.00%        | 4.84%    | -               | -        |
| DP4+ (all data)  | 100.00%  | 0.00%    | 0.00%        | 0.00%    | -               | -        |

**Figure S15.** DP4+ analysis of experimental NMR data of **2** and unscaled shifts of **2a-2d** (Isomer 1-4)

**Table S5.** The Cartesian coordinates of the lowest energy conformers for **2a-2d** in the gas phase at the B3LYP/6-31G(d,p) level

| 2a-1 | X axis(Å) | Y axis(Å) | Z axis(Å) | 2a-2 | X axis(Å) | Y axis(Å) | Z axis(Å) |
|------|-----------|-----------|-----------|------|-----------|-----------|-----------|
| C    | 3.5441    | -2.7128   | -1.0641   | C    | 3.4703    | -2.6563   | -1.2382   |
| C    | 2.9984    | -2.6068   | 0.354     | C    | 2.968     | -2.6214   | 0.1992    |
| C    | 2.3839    | -1.2251   | 0.6024    | C    | 2.3566    | -1.2566   | 0.5333    |
| C    | 3.411     | -0.0641   | 0.3459    | C    | 3.3704    | -0.0785   | 0.3009    |
| C    | 4.0989    | -0.1787   | -1.0679   | C    | 4.0153    | -0.1224   | -1.1371   |
| C    | 4.5843    | -1.6327   | -1.3344   | C    | 4.4981    | -1.5594   | -1.4871   |
| C    | 2.8013    | 1.3516    | 0.5359    | C    | 2.7604    | 1.3234    | 0.5757    |
| C    | 1.8896    | 1.8363    | -0.6085   | C    | 1.8124    | 1.8561    | -0.517    |
| C    | 2.5816    | 1.6859    | -1.9733   | C    | 2.464     | 1.7746    | -1.9071   |
| C    | 3.1286    | 0.2725    | -2.1897   | C    | 3.0096    | 0.376     | -2.2065   |
| C    | 5.3783    | 0.7058    | -1.1517   | C    | 5.2881    | 0.7719    | -1.2174   |
| O    | 1.185     | -1.1242   | -0.1984   | O    | 1.1325    | -1.1229   | -0.223    |
| C    | 1.3692    | 3.2341    | -0.3134   | C    | 1.2921    | 3.2346    | -0.142    |
| C    | -6.3658   | -0.3628   | -0.923    | C    | -5.6148   | -0.0283   | -1.7907   |
| C    | -5.7376   | 0.9702    | -0.5356   | C    | -5.5094   | 1.0511    | -0.72     |
| C    | -4.4108   | 0.8369    | 0.1756    | C    | -4.3288   | 0.8475    | 0.1984    |
| C    | -3.6904   | -0.3113   | 0.2071    | C    | -3.7043   | -0.3469   | 0.3409    |
| C    | -4.1487   | -1.5729   | -0.5551   | C    | -4.2073   | -1.6235   | -0.3648   |
| C    | -5.3169   | -1.2756   | -1.5364   | C    | -5.5304   | -1.4028   | -1.1496   |
| C    | -2.3781   | -0.5006   | 0.955     | C    | -2.394    | -0.5612   | 1.0817    |
| C    | -1.2524   | -0.9726   | 0.0167    | C    | -1.296    | -0.9744   | 0.0788    |
| C    | -1.6561   | -2.2906   | -0.6581   | C    | -1.713    | -2.2377   | -0.6949   |
| C    | -2.9797   | -2.1378   | -1.4095   | C    | -3.0955   | -2.0845   | -1.3456   |
| C    | -4.6205   | -2.6416   | 0.4587    | C    | -4.5048   | -2.7487   | 0.6564    |
| C    | -3.978    | 2.1061    | 0.8446    | C    | -3.8778   | 2.1016    | 0.8827    |
| O    | -4.6131   | 3.152     | 0.7458    | O    | -4.3957   | 3.194     | 0.6713    |
| C    | 0.0981    | -1.1103   | 0.6789    | C    | 0.0743    | -1.1512   | 0.6884    |
| C    | 1.8222    | -1.1732   | 2.0052    | C    | 1.8399    | -1.2764   | 1.9541    |
| O    | 4.4786    | -0.187    | 1.3186    | O    | 4.4678    | -0.2409   | 1.2337    |

|             |                  |                  |                  |             |                  |                  |                  |
|-------------|------------------|------------------|------------------|-------------|------------------|------------------|------------------|
| C           | 1.8348           | 4.391            | -0.8117          | C           | 1.7318           | 4.4168           | -0.6031          |
| O           | 2.4728           | -1.1346          | 3.0406           | O           | 2.5231           | -1.287           | 2.9691           |
| C           | 0.37             | -1.1411          | 1.9822           | C           | 0.3877           | -1.247           | 1.9791           |
| C           | 0.1931           | 3.3363           | 0.6024           | C           | 0.1453           | 3.2851           | 0.8145           |
| H           | -0.1794          | 4.3561           | 0.799            | H           | -0.2344          | 4.2911           | 1.0619           |
| O           | -0.3386          | 2.3562           | 1.1123           | O           | -0.355           | 2.2785           | 1.3042           |
| H           | 4.0028           | -3.6989          | -1.2022          | H           | 3.9279           | -3.6324          | -1.4377          |
| H           | 2.728            | -2.6469          | -1.7923          | H           | 2.6321           | -2.5593          | -1.9372          |
| H           | 2.2454           | -3.3932          | 0.4933           | H           | 2.2223           | -3.4173          | 0.3232           |
| H           | 3.7997           | -2.8084          | 1.076            | H           | 3.7917           | -2.8538          | 0.8857           |
| H           | 4.9324           | -1.727           | -2.3712          | H           | 4.8155           | -1.6024          | -2.5371          |
| H           | 5.4571           | -1.8475          | -0.7027          | H           | 5.3901           | -1.7997          | -0.8925          |
| H           | 2.2633           | 1.3939           | 1.4914           | H           | 2.2514           | 1.3173           | 1.5479           |
| H           | 3.6193           | 2.0736           | 0.6712           | H           | 3.5788           | 2.043            | 0.7203           |
| H           | 1.0067           | 1.1941           | -0.6627          | H           | 0.9317           | 1.2114           | -0.5756          |
| H           | 1.8674           | 1.9153           | -2.7746          | H           | 1.7256           | 2.0379           | -2.6752          |
| H           | 3.4006           | 2.4047           | -2.0818          | H           | 3.2766           | 2.5022           | -2.0051          |
| H           | 3.6413           | 0.2435           | -3.1601          | H           | 3.4927           | 0.3954           | -3.1922          |
| H           | 2.2866           | -0.4203          | -2.2848          | H           | 2.1678           | -0.3159          | -2.3085          |
| H           | 6.1562           | 0.3603           | -0.4614          | H           | 6.0881           | 0.3981           | -0.5684          |
| H           | 5.8086           | 0.6716           | -2.1597          | H           | 5.6874           | 0.7883           | -2.2385          |
| H           | 5.1842           | 1.7552           | -0.9155          | H           | 5.0972           | 1.8079           | -0.9253          |
| H           | -6.8198          | -0.835           | -0.0443          | H           | -6.5661          | 0.0765           | -2.3249          |
| H           | -7.1773          | -0.1906          | -1.6395          | H           | -4.8186          | 0.0967           | -2.5341          |
| H           | -6.4573          | 1.5073           | 0.0944           | H           | -6.4257          | 1.0711           | -0.1169          |
| H           | -5.5866          | 1.5747           | -1.4392          | H           | -5.4414          | 2.0163           | -1.2358          |
| H           | -5.7888          | -2.2099          | -1.8654          | H           | -6.3909          | -1.5113          | -0.4745          |
| H           | -4.9355          | -0.7915          | -2.446           | H           | -5.6516          | -2.1755          | -1.9193          |
| H           | -2.0515          | 0.405            | 1.4655           | H           | -2.0632          | 0.326            | 1.6214           |
| H           | -2.5388          | -1.2335          | 1.7559           | H           | -2.5295          | -1.3243          | 1.8566           |
| H           | -1.1413          | -0.2074          | -0.766           | H           | -1.2065          | -0.1546          | -0.6502          |
| H           | -0.8827          | -2.6055          | -1.3704          | H           | -0.9797          | -2.456           | -1.4819          |
| H           | -1.7359          | -3.0933          | 0.0853           | H           | -1.7104          | -3.1081          | -0.0273          |
| H           | -2.7961          | -1.4712          | -2.2638          | H           | -3.0034          | -1.3621          | -2.1673          |
| H           | -3.2617          | -3.109           | -1.8362          | H           | -3.3732          | -3.0402          | -1.8085          |
| H           | -5.0112          | -3.5264          | -0.0573          | H           | -4.927           | -3.6273          | 0.1539           |
| H           | -3.8127          | -2.9867          | 1.1114           | H           | -3.6171          | -3.0915          | 1.1949           |
| H           | -5.4153          | -2.2592          | 1.1084           | H           | -5.2306          | -2.4148          | 1.4075           |
| H           | -3.0538          | 2.0767           | 1.4336           | H           | -3.0618          | 2.0106           | 1.6099           |
| H           | 4.0843           | -0.2411          | 2.2147           | H           | 4.1016           | -0.3403          | 2.1377           |
| H           | 1.3976           | 5.3535           | -0.5602          | H           | 1.2951           | 5.363            | -0.2948          |
| H           | 2.6831           | 4.4245           | -1.4875          | H           | 2.5566           | 4.4883           | -1.3044          |
| H           | -0.2683          | -1.0981          | 2.8432           | H           | -0.2225          | -1.2442          | 2.8614           |
| <b>2a-3</b> | <b>X axis(Å)</b> | <b>Y axis(Å)</b> | <b>Z axis(Å)</b> | <b>2a-4</b> | <b>X axis(Å)</b> | <b>Y axis(Å)</b> | <b>Z axis(Å)</b> |
| C           | -3.0766          | -1.4535          | 2.6402           | C           | 2.9871           | -0.9388          | -2.9185          |
| C           | -2.9065          | -2.2806          | 1.3717           | C           | 2.8386           | -1.9605          | -1.7974          |
| C           | -2.3839          | -1.4111          | 0.2203           | C           | 2.3295           | -1.2886          | -0.5157          |

|   |         |         |         |   |         |         |         |
|---|---------|---------|---------|---|---------|---------|---------|
| C | -3.3422 | -0.2036 | -0.0742 | C | 3.2932  | -0.1416 | -0.0424 |
| C | -3.6393 | 0.6449  | 1.2192  | C | 3.575   | 0.9044  | -1.1858 |
| C | -4.0205 | -0.279  | 2.412   | C | 3.9341  | 0.1864  | -2.5191 |
| C | -2.8585 | 0.7238  | -1.2193 | C | 2.8155  | 0.5811  | 1.2429  |
| C | -1.6834 | 1.6543  | -0.8604 | C | 1.6378  | 1.5519  | 1.0462  |
| C | -1.9477 | 2.4225  | 0.4439  | C | 1.9157  | 2.5395  | -0.1    |
| C | -2.4155 | 1.5201  | 1.5884  | C | 2.3509  | 1.8341  | -1.3883 |
| C | -4.8624 | 1.5876  | 1.0199  | C | 4.8081  | 1.7958  | -0.8532 |
| O | -1.0256 | -1.0295 | 0.5407  | O | 0.9677  | -0.8637 | -0.7627 |
| C | -1.2872 | 2.6229  | -1.9658 | C | 1.2603  | 2.1988  | 2.3692  |
| C | 6.1865  | 0.2471  | 0.3539  | C | -6.198  | 0.5     | -0.3332 |
| C | 5.2656  | 1.0566  | 1.2576  | C | -5.2857 | 1.3358  | -1.2215 |
| C | 3.7973  | 0.8963  | 0.9396  | C | -3.8111 | 1.1166  | -0.9702 |
| C | 3.2976  | -0.0991 | 0.1654  | C | -3.3165 | 0.0743  | -0.2568 |
| C | 4.2192  | -1.1627 | -0.4612 | C | -4.2471 | -1.0038 | 0.3352  |
| C | 5.6391  | -1.1586 | 0.1698  | C | -5.6845 | -0.9276 | -0.25   |
| C | 1.8225  | -0.2723 | -0.1762 | C | -1.8416 | -0.153  | 0.0543  |
| C | 1.2971  | -1.6986 | 0.08    | C | -1.3532 | -1.5641 | -0.327  |
| C | 2.1736  | -2.7296 | -0.646  | C | -2.2333 | -2.627  | 0.3488  |
| C | 3.6384  | -2.5837 | -0.2397 | C | -3.7073 | -2.4205 | 0.0047  |
| C | 4.352   | -0.8796 | -1.9767 | C | -4.3296 | -0.8163 | 1.8689  |
| C | 2.9534  | 1.9753  | 1.5476  | C | -2.9552 | 2.1867  | -1.5751 |
| O | 3.3883  | 2.7446  | 2.4     | O | -3.4159 | 3.0941  | -2.2605 |
| C | -0.1762 | -1.8006 | -0.2578 | C | 0.1279  | -1.7271 | -0.0522 |
| C | -2.1677 | -2.2717 | -1.0031 | C | 2.1307  | -2.3318 | 0.5597  |
| O | -4.6178 | -0.743  | -0.5038 | O | 4.5738  | -0.7394 | 0.2799  |
| C | -2.0681 | 3.0833  | -2.9571 | C | 1.5292  | 3.4539  | 2.7638  |
| O | -3.0373 | -2.6918 | -1.7538 | O | 3.0164  | -2.8932 | 1.19    |
| C | -0.753  | -2.5457 | -1.1994 | C | 0.7169  | -2.6015 | 0.7624  |
| C | 0.1284  | 3.0996  | -1.9753 | C | 0.4752  | 1.3604  | 3.3252  |
| H | 0.3906  | 3.8205  | -2.7682 | H | 0.215   | 1.8372  | 4.2855  |
| O | 0.9631  | 2.7184  | -1.1634 | O | 0.1303  | 0.2121  | 3.0706  |
| H | -3.4789 | -2.091  | 3.4363  | H | 3.3763  | -1.4381 | -3.8136 |
| H | -2.1034 | -1.0951 | 2.9938  | H | 2.0081  | -0.5304 | -3.1937 |
| H | -2.208  | -3.0995 | 1.5867  | H | 2.1388  | -2.7377 | -2.1306 |
| H | -3.8613 | -2.7482 | 1.1005  | H | 3.7985  | -2.4607 | -1.618  |
| H | -4.0837 | 0.3098  | 3.3363  | H | 3.9817  | 0.9173  | -3.3367 |
| H | -5.0261 | -0.6898 | 2.2471  | H | 4.9421  | -0.2436 | -2.4406 |
| H | -2.5961 | 0.1253  | -2.1013 | H | 2.5718  | -0.164  | 2.0104  |
| H | -3.7184 | 1.3189  | -1.5517 | H | 3.6624  | 1.1285  | 1.6804  |
| H | -0.8182 | 1.0076  | -0.6989 | H | 0.7606  | 0.9821  | 0.734   |
| H | -1.0347 | 2.9397  | 0.7658  | H | 1.0112  | 3.1259  | -0.307  |
| H | -2.6899 | 3.2118  | 0.2715  | H | 2.6881  | 3.2621  | 0.185   |
| H | -2.6578 | 2.1536  | 2.4519  | H | 2.5844  | 2.5989  | -2.1407 |
| H | -1.5729 | 0.902   | 1.913   | H | 1.4977  | 1.2812  | -1.7932 |
| H | -5.7847 | 1.0234  | 0.842   | H | 5.7313  | 1.2077  | -0.8004 |
| H | -5.0298 | 2.1994  | 1.9145  | H | 4.9578  | 2.5559  | -1.6293 |

|             |                  |                  |                  |             |                  |                  |                  |
|-------------|------------------|------------------|------------------|-------------|------------------|------------------|------------------|
| H           | -4.7374          | 2.2737           | 0.1782           | H           | 4.7081           | 2.3206           | 0.1004           |
| H           | 6.2966           | 0.7469           | -0.6152          | H           | -6.2605          | 0.9452           | 0.6663           |
| H           | 7.1883           | 0.2033           | 0.7966           | H           | -7.2152          | 0.5087           | -0.7417          |
| H           | 5.5625           | 2.1097           | 1.1787           | H           | -5.5485          | 2.3899           | -1.0692          |
| H           | 5.4272           | 0.7549           | 2.3005           | H           | -5.4938          | 1.1018           | -2.2736          |
| H           | 6.3329           | -1.745           | -0.4457          | H           | -6.3753          | -1.5321          | 0.3512           |
| H           | 5.6174           | -1.647           | 1.1539           | H           | -5.7056          | -1.3566          | -1.2613          |
| H           | 1.196            | 0.4113           | 0.3989           | H           | -1.2045          | 0.5718           | -0.4529          |
| H           | 1.6745           | -0.0058          | -1.2305          | H           | -1.6851          | 0.0195           | 1.1256           |
| H           | 1.3837           | -1.9013          | 1.1578           | H           | -1.4788          | -1.6807          | -1.4137          |
| H           | 1.8404           | -3.7454          | -0.3979          | H           | -1.9341          | -3.629           | 0.0158           |
| H           | 2.0788           | -2.6265          | -1.7334          | H           | -2.1009          | -2.6064          | 1.4372           |
| H           | 3.7196           | -2.854           | 0.8224           | H           | -3.8296          | -2.6197          | -1.0691          |
| H           | 4.2352           | -3.3228          | -0.7896          | H           | -4.3039          | -3.1802          | 0.526            |
| H           | 5.0271           | -1.6003          | -2.4524          | H           | -5.0184          | -1.5424          | 2.316            |
| H           | 3.3933           | -0.9432          | -2.501           | H           | -3.3614          | -0.9494          | 2.3615           |
| H           | 4.7497           | 0.1229           | -2.1685          | H           | -4.6848          | 0.185            | 2.1358           |
| H           | 1.9144           | 2.0556           | 1.2051           | H           | -1.8765          | 2.1373           | -1.3845          |
| H           | -4.461           | -1.3604          | -1.2493          | H           | 4.4246           | -1.4662          | 0.9216           |
| H           | -1.7043          | 3.7695           | -3.7172          | H           | 1.2113           | 3.8445           | 3.7267           |
| H           | -3.1124          | 2.8021           | -3.0458          | H           | 2.0882           | 4.1448           | 2.1411           |
| H           | -0.341           | -3.2108          | -1.9335          | H           | 0.3118           | -3.3507          | 1.4147           |
| <b>2a-5</b> | <b>X axis(Å)</b> | <b>Y axis(Å)</b> | <b>Z axis(Å)</b> | <b>2a-6</b> | <b>X axis(Å)</b> | <b>Y axis(Å)</b> | <b>Z axis(Å)</b> |
| C           | 3.323            | -2.0747          | -2.1764          | C           | 1.6904           | -2.9217          | -1.6318          |
| C           | 2.9394           | -2.5503          | -0.7812          | C           | 1.6057           | -2.9081          | -0.11            |
| C           | 2.3522           | -1.3998          | 0.048            | C           | 1.8114           | -1.4872          | 0.4311           |
| C           | 3.3525           | -0.1951          | 0.1647           | C           | 3.1973           | -0.8959          | -0.0108          |
| C           | 3.8756           | 0.2813           | -1.2432          | C           | 3.3998           | -0.9668          | -1.571           |
| C           | 4.3257           | -0.9299          | -2.1098          | C           | 3.0289           | -2.3769          | -2.1157          |
| C           | 2.7844           | 1.0067           | 0.9636           | C           | 3.4491           | 0.5453           | 0.5              |
| C           | 1.7498           | 1.8681           | 0.2141           | C           | 2.6588           | 1.6452           | -0.2314          |
| C           | 2.2687           | 2.2824           | -1.1735          | C           | 2.8376           | 1.5345           | -1.7558          |
| C           | 2.7828           | 1.0914           | -1.9858          | C           | 2.5555           | 0.1231           | -2.2804          |
| C           | 5.1388           | 1.1824           | -1.1071          | C           | 4.8918           | -0.7532          | -1.9636          |
| O           | 1.0713           | -1.0507          | -0.5286          | O           | 0.6678           | -0.7011          | 0.0187           |
| C           | 1.298            | 3.0274           | 1.0904           | C           | 2.9913           | 3.0097           | 0.3523           |
| C           | -6.3315          | 0.1268           | -0.5986          | C           | -6.1838          | 1.1434           | -1.1276          |
| C           | -5.4077          | 1.2512           | -1.049           | C           | -6.2632          | -0.0975          | -0.2482          |
| C           | -3.9813          | 1.1032           | -0.5734          | C           | -4.922           | -0.7308          | 0.0445           |
| C           | -3.4686          | -0.0488          | -0.074           | C           | -3.7343          | -0.112           | -0.1697          |
| C           | -4.33            | -1.3226          | 0.0473           | C           | -3.6712          | 1.3304           | -0.7172          |
| C           | -5.6471          | -1.2194          | -0.7705          | C           | -5.051           | 2.0429           | -0.6629          |
| C           | -2.0386          | -0.2172          | 0.4249           | C           | -2.3647          | -0.7329          | 0.0795           |
| C           | -1.3319          | -1.4436          | -0.1771          | C           | -1.4578          | 0.1567           | 0.9512           |
| C           | -2.1523          | -2.7165          | 0.0673           | C           | -1.3224          | 1.555            | 0.34             |
| C           | -3.5642          | -2.5595          | -0.4953          | C           | -2.6948          | 2.1906           | 0.1291           |
| C           | -4.6886          | -1.5429          | 1.5364           | C           | -3.1951          | 1.2916           | -2.1891          |

|   |         |         |         |   |         |         |         |
|---|---------|---------|---------|---|---------|---------|---------|
| C | -3.1962 | 2.3739  | -0.6792 | C | -5.0443 | -2.1257 | 0.5747  |
| O | -3.6273 | 3.3734  | -1.2454 | O | -6.1254 | -2.6367 | 0.8483  |
| C | 0.0876  | -1.5518 | 0.3266  | C | -0.1137 | -0.4957 | 1.1552  |
| C | 1.9389  | -1.9278 | 1.404   | C | 1.6543  | -1.4894 | 1.9362  |
| O | 4.5204  | -0.6537 | 0.8907  | O | 4.239   | -1.7207 | 0.5685  |
| C | 1.6571  | 4.3168  | 0.9789  | C | 3.7535  | 3.9662  | -0.2026 |
| O | 2.6905  | -2.2091 | 2.3275  | O | 2.462   | -1.9298 | 2.7425  |
| C | 0.4948  | -2.0711 | 1.4837  | C | 0.3855  | -0.8942 | 2.3233  |
| C | 0.3232  | 2.7127  | 2.1772  | C | 2.3785  | 3.341   | 1.6747  |
| H | 0.0241  | 3.5585  | 2.8193  | H | 2.628   | 4.333   | 2.0878  |
| O | -0.1325 | 1.5887  | 2.353   | O | 1.6403  | 2.5696  | 2.2761  |
| H | 3.7637  | -2.9092 | -2.7345 | H | 1.5673  | -3.95   | -1.9916 |
| H | 2.4306  | -1.7677 | -2.7331 | H | 0.8667  | -2.3425 | -2.0642 |
| H | 2.2102  | -3.3643 | -0.8842 | H | 0.621   | -3.2947 | 0.1829  |
| H | 3.8165  | -2.9786 | -0.2798 | H | 2.3493  | -3.5954 | 0.3122  |
| H | 4.552   | -0.5964 | -3.1308 | H | 3.0321  | -2.3667 | -3.2133 |
| H | 5.2653  | -1.3353 | -1.7099 | H | 3.8042  | -3.0967 | -1.8191 |
| H | 2.3636  | 0.647   | 1.911   | H | 3.2548  | 0.587   | 1.5788  |
| H | 3.6192  | 1.6472  | 1.2823  | H | 4.5233  | 0.7671  | 0.4275  |
| H | 0.857   | 1.266   | 0.0244  | H | 1.592   | 1.4967  | -0.049  |
| H | 1.4629  | 2.772   | -1.7354 | H | 2.1612  | 2.2388  | -2.257  |
| H | 3.0717  | 3.0224  | -1.0876 | H | 3.8518  | 1.8239  | -2.0518 |
| H | 3.1796  | 1.4663  | -2.9384 | H | 2.7582  | 0.1072  | -3.3594 |
| H | 1.9339  | 0.4556  | -2.2552 | H | 1.4848  | -0.0817 | -2.1847 |
| H | 5.9882  | 0.6295  | -0.6904 | H | 5.5317  | -1.5542 | -1.5766 |
| H | 5.4535  | 1.5599  | -2.0873 | H | 5.0091  | -0.7493 | -3.0539 |
| H | 4.9743  | 2.0493  | -0.462  | H | 5.2984  | 0.1901  | -1.5899 |
| H | -6.6251 | 0.2779  | 0.4464  | H | -6.0405 | 0.854   | -2.1749 |
| H | -7.2556 | 0.1543  | -1.1877 | H | -7.1352 | 1.686   | -1.082  |
| H | -5.8351 | 2.1966  | -0.6927 | H | -6.9263 | -0.8157 | -0.746  |
| H | -5.4015 | 1.2953  | -2.1458 | H | -6.7352 | 0.1665  | 0.707   |
| H | -6.3387 | -2.0217 | -0.4842 | H | -5.0344 | 2.9564  | -1.2706 |
| H | -5.4402 | -1.3622 | -1.8401 | H | -5.2713 | 2.3647  | 0.3644  |
| H | -1.4225 | 0.6522  | 0.1958  | H | -2.4293 | -1.7103 | 0.5619  |
| H | -2.0613 | -0.2927 | 1.5196  | H | -1.8913 | -0.921  | -0.8931 |
| H | -1.2792 | -1.3014 | -1.2669 | H | -1.9412 | 0.2662  | 1.9331  |
| H | -1.6676 | -3.5723 | -0.4193 | H | -0.7345 | 2.1985  | 1.0046  |
| H | -2.2043 | -2.9557 | 1.1357  | H | -0.7816 | 1.5157  | -0.6129 |
| H | -3.4827 | -2.4914 | -1.589  | H | -3.1321 | 2.376   | 1.1201  |
| H | -4.1339 | -3.4745 | -0.2879 | H | -2.5629 | 3.1761  | -0.3359 |
| H | -5.3346 | -2.42   | 1.6586  | H | -3.1798 | 2.2981  | -2.6228 |
| H | -3.8045 | -1.706  | 2.1607  | H | -2.1848 | 0.8836  | -2.2933 |
| H | -5.2174 | -0.6812 | 1.9582  | H | -3.8516 | 0.6731  | -2.8108 |
| H | -2.2014 | 2.39    | -0.2172 | H | -4.1165 | -2.6935 | 0.7145  |
| H | 4.2246  | -1.0512 | 1.7373  | H | 4.0891  | -1.7747 | 1.5364  |
| H | 1.2763  | 5.0896  | 1.6412  | H | 3.9325  | 4.9232  | 0.2797  |
| H | 2.3547  | 4.6567  | 0.2204  | H | 4.2395  | 3.8289  | -1.1629 |



| H    | -0.0543   | -2.4919   | 2.3035    | H    | -0.0098   | -0.8291   | 3.3184    |
|------|-----------|-----------|-----------|------|-----------|-----------|-----------|
| 2a-7 | X axis(Å) | Y axis(Å) | Z axis(Å) | 2a-8 | X axis(Å) | Y axis(Å) | Z axis(Å) |
| C    | -1.753    | -2.7825   | 1.824     | C    | 2.8308    | -0.5929   | -3.0683   |
| C    | -1.662    | -2.9404   | 0.3113    | C    | 2.6872    | -1.7478   | -2.0841   |
| C    | -1.8496   | -1.5885   | -0.3904   | C    | 2.2511    | -1.2343   | -0.7061   |
| C    | -3.2236   | -0.9279   | -0.0202   | C    | 3.2721    | -0.1893   | -0.1283   |
| C    | -3.4311   | -0.8231   | 1.5378    | C    | 3.5493    | 0.9881    | -1.1372   |
| C    | -3.0868   | -2.1709   | 2.2353    | C    | 3.8324    | 0.4401    | -2.566    |
| C    | -3.4572   | 0.4549    | -0.6829   | C    | 2.8677    | 0.3732    | 1.2582    |
| C    | -2.658    | 1.6244    | -0.0725   | C    | 1.7197    | 1.3977    | 1.2371    |
| C    | -2.8148   | 1.6734    | 1.4555    | C    | 1.9924    | 2.5184    | 0.2194    |
| C    | -2.5672   | 0.3201    | 2.1262    | C    | 2.3535    | 1.9746    | -1.1666   |
| C    | -4.9183   | -0.5384   | 1.9014    | C    | 4.8258    | 1.7891    | -0.7431   |
| O    | -0.6964   | -0.7714   | -0.0813   | O    | 0.8973    | -0.7386   | -0.8387   |
| C    | -2.9746   | 2.9853    | -0.6776   | C    | 1.4133    | 1.8757    | 2.6474    |
| C    | 6.1327    | 1.2177    | 0.9011    | C    | -6.0176   | -0.0224   | -1.0633   |
| C    | 6.2135    | -0.1716   | 0.2823    | C    | -5.2877   | 1.3002    | -1.2626   |
| C    | 4.8695    | -0.8331   | 0.0802    | C    | -3.8245   | 1.2161    | -0.9001   |
| C    | 3.688     | -0.1692   | 0.13      | C    | -3.317    | 0.245     | -0.1022   |
| C    | 3.6362    | 1.3541    | 0.3835    | C    | -4.2234   | -0.7911   | 0.594     |
| C    | 5.0304    | 2.0242    | 0.2355    | C    | -5.7375   | -0.5582   | 0.3297    |
| C    | 2.3151    | -0.8097   | -0.04     | C    | -1.8349   | -0.0106   | 0.1322    |
| C    | 1.4548    | -0.093    | -1.0975   | C    | -1.4294   | -1.4088   | -0.385    |
| C    | 1.3253    | 1.397     | -0.771    | C    | -2.3266   | -2.5028   | 0.2269    |
| C    | 2.7009    | 2.0461    | -0.6444   | C    | -3.8195   | -2.1909   | 0.0643    |
| C    | 3.1177    | 1.609     | 1.819     | C    | -4.0509   | -0.7357   | 2.1322    |
| C    | 4.9788    | -2.3072   | -0.1557   | C    | -2.989    | 2.278     | -1.5434   |
| O    | 6.0547    | -2.8731   | -0.3198   | O    | -3.4573   | 3.1247    | -2.2975   |
| C    | 0.1       | -0.7421   | -1.2253   | C    | 0.0543    | -1.6566   | -0.2046   |
| C    | -1.6939   | -1.7725   | -1.8843   | C    | 2.0556    | -2.4022   | 0.2328    |
| O    | -4.2788   | -1.7944   | -0.5084   | O    | 4.5415    | -0.8632   | 0.0611    |
| C    | -4.0948   | 3.3429    | -1.3275   | C    | 1.7464    | 3.0567    | 3.193     |
| O    | -2.5241   | -2.2534   | -2.643    | O    | 2.9436    | -3.0703   | 0.7447    |
| C    | -0.3998   | -1.2846   | -2.3333   | C    | 0.6418    | -2.648    | 0.4642    |
| C    | -1.9203   | 4.039     | -0.5716   | C    | 0.6279    | 0.9459    | 3.5146    |
| H    | -2.1738   | 5.0203    | -1.0075   | H    | 0.4198    | 1.2998    | 4.5386    |
| O    | -0.8335   | 3.845     | -0.0412   | O    | 0.2285    | -0.1455   | 3.1252    |
| H    | -1.6448   | -3.7654   | 2.2974    | H    | 3.1679    | -0.9825   | -4.0361   |
| H    | -0.9235   | -2.1689   | 2.193     | H    | 1.8578    | -0.1217   | -3.2471   |
| H    | -0.6811   | -3.3696   | 0.0693    | H    | 1.9475    | -2.4524   | -2.4858   |
| H    | -2.4124   | -3.6625   | -0.0342   | H    | 3.6343    | -2.2968   | -2.0114   |
| H    | -3.0965   | -2.0417   | 3.3253    | H    | 3.8762    | 1.2699    | -3.2832   |
| H    | -3.8714   | -2.907    | 2.0121    | H    | 4.8262    | -0.0279   | -2.5859   |
| H    | -3.2531   | 0.3935    | -1.7598   | H    | 3.7492    | 0.8319    | 1.7282    |
| H    | -4.5318   | 0.6711    | -0.63     | H    | 2.6251    | -0.4579   | 1.932     |
| H    | -1.606    | 1.4321    | -0.2958   | H    | 0.8116    | 0.9024    | 0.8882    |
| H    | -2.1125   | 2.4002    | 1.8828    | H    | 1.1035    | 3.1557    | 0.1277    |

|             |                  |                  |                  |             |                  |                  |                  |
|-------------|------------------|------------------|------------------|-------------|------------------|------------------|------------------|
| H           | -3.8151          | 2.0385           | 1.7193           | H           | 2.801            | 3.1719           | 0.5642           |
| H           | -2.7689          | 0.424            | 3.2005           | H           | 2.587            | 2.8236           | -1.8224          |
| H           | -1.5009          | 0.0843           | 2.0548           | H           | 1.4663           | 1.5065           | -1.6041          |
| H           | -5.5755          | -1.3592          | 1.5932           | H           | 5.7282           | 1.1706           | -0.8059          |
| H           | -5.0371          | -0.424           | 2.9855           | H           | 4.974            | 2.6396           | -1.4193          |
| H           | -5.3022          | 0.3731           | 1.4361           | H           | 4.7805           | 2.1867           | 0.274            |
| H           | 5.9548           | 1.1396           | 1.9796           | H           | -7.095           | 0.1291           | -1.1958          |
| H           | 7.095            | 1.7287           | 0.7805           | H           | -5.7032          | -0.748           | -1.8229          |
| H           | 6.8506           | -0.7873          | 0.9291           | H           | -5.758           | 2.0837           | -0.6555          |
| H           | 6.7146           | -0.1046          | -0.692           | H           | -5.4121          | 1.5869           | -2.3137          |
| H           | 5.0138           | 3.0386           | 0.6535           | H           | -6.1398          | 0.1646           | 1.0534           |
| H           | 5.2857           | 2.1371           | -0.8273          | H           | -6.301           | -1.4865          | 0.4871           |
| H           | 2.3759           | -1.8621          | -0.3248          | H           | -1.2074          | 0.7332           | -0.3605          |
| H           | 1.8088           | -0.8006          | 0.9341           | H           | -1.6102          | 0.0894           | 1.199            |
| H           | 1.972            | -0.181           | -2.0643          | H           | -1.6097          | -1.4229          | -1.4705          |
| H           | 0.7613           | 1.9061           | -1.5627          | H           | -2.1179          | -3.4665          | -0.2551          |
| H           | 0.7615           | 1.5429           | 0.1576           | H           | -2.0982          | -2.6352          | 1.2913           |
| H           | 3.17             | 2.0311           | -1.638           | H           | -4.0721          | -2.2739          | -1.0011          |
| H           | 2.5726           | 3.1044           | -0.3827          | H           | -4.3972          | -2.9699          | 0.5781           |
| H           | 3.1065           | 2.6811           | 2.0472           | H           | -4.7301          | -1.4422          | 2.6244           |
| H           | 2.0985           | 1.2397           | 1.9696           | H           | -3.04            | -0.9843          | 2.4664           |
| H           | 3.7461           | 1.1173           | 2.5697           | H           | -4.2782          | 0.2661           | 2.516            |
| H           | 4.0453           | -2.8827          | -0.1766          | H           | -1.9195          | 2.2912           | -1.3001          |
| H           | -4.1266          | -1.9667          | -1.4617          | H           | 4.3899           | -1.6639          | 0.6071           |
| H           | -4.2381          | 4.3374           | -1.7415          | H           | 1.4777           | 3.3268           | 4.2106           |
| H           | -4.9246          | 2.6579           | -1.4669          | H           | 2.312            | 3.8034           | 2.6452           |
| H           | 0.0057           | -1.37            | -3.323           | H           | 0.2355           | -3.4607          | 1.0343           |
| <b>2b-1</b> | <b>X axis(Å)</b> | <b>Y axis(Å)</b> | <b>Z axis(Å)</b> | <b>2b-2</b> | <b>X axis(Å)</b> | <b>Y axis(Å)</b> | <b>Z axis(Å)</b> |
| C           | 4.1559           | -2.7297          | -0.3015          | C           | -4.1038          | -2.7382          | 0.4966           |
| C           | 2.6358           | -2.7994          | -0.2892          | C           | -2.5842          | -2.7891          | 0.434            |
| C           | 1.9965           | -1.4071          | -0.2903          | C           | -1.9649          | -1.3901          | 0.3541           |
| C           | 2.5505           | -0.4878          | 0.8553           | C           | -2.5711          | -0.5272          | -0.809           |
| C           | 4.112            | -0.4931          | 1.0081           | C           | -4.1367          | -0.5585          | -0.9062          |
| C           | 4.6813           | -1.9336          | 0.8856           | C           | -4.6812          | -1.9995          | -0.7034          |
| C           | 1.9971           | 0.9602           | 0.8292           | C           | -2.0376          | 0.9274           | -0.8634          |
| C           | 2.6773           | 1.9024           | -0.1822          | C           | -2.6946          | 1.9026           | 0.132            |
| C           | 4.2075           | 1.8634           | -0.0195          | C           | -4.2289          | 1.838            | 0.0252           |
| C           | 4.7707           | 0.4387           | -0.038           | C           | -4.7715          | 0.4085           | 0.1228           |
| C           | 4.5476           | 0.004            | 2.4202           | C           | -4.6282          | -0.127           | -2.3215          |
| O           | 0.5605           | -1.6019          | -0.0286          | O           | -0.5362          | -1.5775          | 0.0507           |
| C           | 2.0642           | 3.2936           | -0.1082          | C           | -2.1033          | 3.2968           | -0.0199          |
| C           | -6.4333          | -0.1819          | 0.8818           | C           | 6.398            | -0.3278          | 0.1748           |
| C           | -5.8275          | 1.1257           | 0.3867           | C           | 5.8559           | 1.0398           | -0.2232          |
| C           | -4.3267          | 1.0819           | 0.2132           | C           | 4.3476           | 1.0718           | -0.2724          |
| C           | -3.6047          | -0.0658          | 0.2167           | C           | 3.592            | -0.0461          | -0.3992          |
| C           | -4.2851          | -1.4463          | 0.3344           | C           | 4.2229           | -1.4418          | -0.5934          |
| C           | -5.8239          | -1.3586          | 0.1373           | C           | 5.7734           | -1.4028          | -0.6976          |

|   |         |         |         |   |         |         |         |
|---|---------|---------|---------|---|---------|---------|---------|
| C | -2.0882 | -0.1444 | 0.1167  | C | 2.0785  | -0.096  | -0.2699 |
| C | -1.6337 | -1.0614 | -1.0306 | C | 1.6822  | -0.9569 | 0.9456  |
| C | -2.2216 | -2.4668 | -0.859  | C | 2.2947  | -2.3644 | 0.8626  |
| C | -3.7469 | -2.4077 | -0.7626 | C | 3.8101  | -2.3152 | 0.6224  |
| C | -4.0015 | -2.039  | 1.7349  | C | 3.7286  | -2.1001 | -1.9053 |
| C | -3.7177 | 2.4408  | 0.0457  | C | 3.774   | 2.4457  | -0.1113 |
| O | -4.3811 | 3.4723  | 0.089   | O | 4.4752  | 3.45    | -0.0361 |
| C | -0.1317 | -1.0974 | -1.1227 | C | 0.1858  | -1.0133 | 1.0952  |
| C | 1.9535  | -0.8599 | -1.7052 | C | -1.8809 | -0.7824 | 1.7421  |
| O | 2.0215  | -1.0585 | 2.0899  | O | -2.0773 | -1.1432 | -2.0365 |
| C | 2.6237  | 4.3999  | 0.4087  | C | -2.6964 | 4.3748  | -0.5584 |
| O | 2.9024  | -0.634  | -2.441  | O | -2.8068 | -0.54   | 2.5017  |
| C | 0.5848  | -0.6531 | -2.1496 | C | -0.5011 | -0.5344 | 2.1268  |
| C | 0.7067  | 3.4674  | -0.7097 | C | -0.727  | 3.5108  | 0.5232  |
| H | 0.2946  | 4.4907  | -0.685  | H | -0.3308 | 4.5376  | 0.445   |
| O | 0.0717  | 2.5392  | -1.1981 | O | -0.0608 | 2.61    | 1.0214  |
| H | 4.5617  | -3.7475 | -0.2585 | H | -4.4963 | -3.7619 | 0.5105  |
| H | 4.5163  | -2.2965 | -1.24   | H | -4.4376 | -2.2704 | 1.4283  |
| H | 2.2923  | -3.3822 | -1.1538 | H | -2.2027 | -3.3302 | 1.3097  |
| H | 2.2992  | -3.3625 | 0.5913  | H | -2.2703 | -3.3848 | -0.4334 |
| H | 5.7773  | -1.8998 | 0.8339  | H | -5.7751 | -1.9773 | -0.6145 |
| H | 4.4404  | -2.5001 | 1.7956  | H | -4.4641 | -2.601  | -1.5969 |
| H | 0.9134  | 0.9327  | 0.6674  | H | -0.9485 | 0.9203  | -0.7403 |
| H | 2.0914  | 1.3956  | 1.8346  | H | -2.174  | 1.319   | -1.8819 |
| H | 2.4783  | 1.5491  | -1.1975 | H | -2.4556 | 1.5942  | 1.1533  |
| H | 4.6779  | 2.4383  | -0.8275 | H | -4.5709 | 2.2796  | -0.9175 |
| H | 4.5107  | 2.3483  | 0.9151  | H | -4.6788 | 2.4405  | 0.8248  |
| H | 5.8526  | 0.4939  | 0.1421  | H | -5.8597 | 0.4428  | -0.0213 |
| H | 4.6726  | 0.0296  | -1.0448 | H | -4.6329 | 0.0434  | 1.1417  |
| H | 4.2123  | -0.6754 | 3.2119  | H | -4.3109 | -0.8349 | -3.0955 |
| H | 5.6403  | 0.0608  | 2.4923  | H | -5.7235 | -0.0875 | -2.3573 |
| H | 4.1532  | 0.9951  | 2.6598  | H | -4.2568 | 0.8581  | -2.616  |
| H | -6.2732 | -0.2855 | 1.9611  | H | 7.4878  | -0.3389 | 0.0581  |
| H | -7.5186 | -0.1635 | 0.7284  | H | 6.1898  | -0.5255 | 1.2331  |
| H | -6.1089 | 1.9128  | 1.0969  | H | 6.2488  | 1.3289  | -1.2058 |
| H | -6.2781 | 1.3882  | -0.5791 | H | 6.2367  | 1.7667  | 0.5043  |
| H | -6.3056 | -2.2892 | 0.463   | H | 6.0762  | -1.2082 | -1.7361 |
| H | -6.0645 | -1.2485 | -0.9291 | H | 6.1992  | -2.3803 | -0.4383 |
| H | -1.623  | 0.832   | -0.0179 | H | 1.6291  | 0.8908  | -0.1566 |
| H | -1.6965 | -0.5108 | 1.0746  | H | 1.643   | -0.4926 | -1.1946 |
| H | -2.0275 | -0.6454 | -1.9698 | H | 2.0988  | -0.4734 | 1.8421  |
| H | -1.9417 | -3.0968 | -1.7128 | H | 2.1007  | -2.9084 | 1.7959  |
| H | -1.8112 | -2.9559 | 0.0327  | H | 1.8157  | -2.9479 | 0.0671  |
| H | -4.1282 | -2.0931 | -1.7441 | H | 4.2873  | -1.9313 | 1.5338  |
| H | -4.1332 | -3.4214 | -0.5958 | H | 4.1777  | -3.3411 | 0.4926  |
| H | -4.5219 | -2.9944 | 1.869   | H | 4.2239  | -3.0653 | -2.0657 |
| H | -2.9371 | -2.2307 | 1.9023  | H | 2.6524  | -2.2927 | -1.9163 |

|             |                  |                  |                  |             |                  |                  |                  |
|-------------|------------------|------------------|------------------|-------------|------------------|------------------|------------------|
| H           | -4.3328          | -1.3664          | 2.5336           | H           | 3.9512           | -1.4644          | -2.7707          |
| H           | -2.6363          | 2.4902           | -0.1294          | H           | 2.6814           | 2.5343           | -0.0767          |
| H           | 1.076            | -1.2459          | 1.9276           | H           | -1.1245          | -1.3126          | -1.8994          |
| H           | 2.1212           | 5.3635           | 0.4094           | H           | -2.2076          | 5.3437           | -0.6158          |
| H           | 3.6105           | 4.3888           | 0.8598           | H           | -3.6992          | 4.3339           | -0.9711          |
| H           | 0.281            | -0.2111          | -3.0792          | H           | -0.1718          | -0.046           | 3.024            |
| <b>2b-3</b> | <b>X axis(Å)</b> | <b>Y axis(Å)</b> | <b>Z axis(Å)</b> | <b>2b-4</b> | <b>X axis(Å)</b> | <b>Y axis(Å)</b> | <b>Z axis(Å)</b> |
| C           | 3.9236           | -3.0955          | -0.0971          | C           | -3.1096          | -2.9566          | 1.5968           |
| C           | 2.4713           | -2.917           | 0.3196           | C           | -1.6925          | -2.5369          | 1.2362           |
| C           | 1.9985           | -1.4691          | 0.1581           | C           | -1.6451          | -1.1354          | 0.6191           |
| C           | 2.9461           | -0.4371          | 0.8668           | C           | -2.6348          | -0.9689          | -0.5875          |
| C           | 4.4782           | -0.6661          | 0.6125           | C           | -4.0772          | -1.538           | -0.3428          |
| C           | 4.8406           | -2.1746          | 0.6963           | C           | -4.0224          | -2.9127          | 0.379            |
| C           | 2.5579           | 1.0457           | 0.6305           | C           | -2.6912          | 0.4699           | -1.163           |
| C           | 3.0175           | 1.6346           | -0.7169          | C           | -3.583           | 1.4528           | -0.3801          |
| C           | 4.5195           | 1.3861           | -0.9378          | C           | -4.9842          | 0.8604           | -0.1518          |
| C           | 4.9026           | -0.0864          | -0.7592          | C           | -4.9352          | -0.5383          | 0.4705           |
| C           | 5.3463           | 0.0283           | 1.7056           | C           | -4.8177          | -1.807           | -1.6882          |
| O           | 0.6877           | -1.3805          | 0.8212           | O           | -0.2824          | -0.9586          | 0.0903           |
| C           | 2.586            | 3.0883           | -0.8322          | C           | -3.5699          | 2.821            | -1.0441          |
| C           | -6.6177          | 0.955            | 0.8104           | C           | 6.8823           | 0.4683           | -0.4116          |
| C           | -6.5718          | -0.379           | 0.0771           | C           | 6.2623           | -0.7278          | -1.1217          |
| C           | -5.2102          | -0.7279          | -0.4798          | C           | 4.8648           | -1.0662          | -0.6539          |
| C           | -4.0646          | -0.1003          | -0.1146          | C           | 4.0984           | -0.2327          | 0.093            |
| C           | -4.0699          | 1.0205           | 0.9464           | C           | 4.6025           | 1.1693           | 0.4967           |
| C           | -5.4126          | 1.0901           | 1.7256           | C           | 5.8679           | 1.5936           | -0.2991          |
| C           | -2.6817          | -0.3929          | -0.6855          | C           | 2.703            | -0.5569          | 0.6153           |
| C           | -1.6274          | -0.6719          | 0.4061           | C           | 1.6649           | 0.5249           | 0.258            |
| C           | -1.5797          | 0.4935           | 1.4055           | C           | 2.1355           | 1.8974           | 0.7617           |
| C           | -2.959           | 0.769            | 1.9993           | C           | 3.5162           | 2.2387           | 0.2047           |
| C           | -3.8352          | 2.382            | 0.2495           | C           | 4.9479           | 1.1683           | 2.0049           |
| C           | -5.2655          | -1.8266          | -1.4957          | C           | 4.4251           | -2.4303          | -1.0894          |
| O           | -6.298           | -2.4366          | -1.7543          | O           | 5.1056           | -3.141           | -1.8222          |
| C           | -0.2393          | -0.9523          | -0.1264          | C           | 0.2939           | 0.1224           | 0.7523           |
| C           | 1.5983           | -1.2092          | -1.2797          | C           | -1.6577          | -0.086           | 1.7123           |
| O           | 2.7369           | -0.6472          | 2.2954           | O           | -2.0616          | -1.7725          | -1.662           |
| C           | 3.3649           | 4.1761           | -0.7146          | C           | -4.5482          | 3.3756           | -1.7782          |
| O           | 2.3026           | -1.3091          | -2.2732          | O           | -2.5305          | 0.1013           | 2.5469           |
| C           | 0.1946           | -0.8408          | -1.3785          | C           | -0.4324          | 0.6979           | 1.7059           |
| C           | 1.1469           | 3.34             | -1.1488          | C           | -2.352           | 3.6597           | -0.828           |
| H           | 0.8542           | 4.3985           | -1.2545          | H           | -2.365           | 4.6593           | -1.2946          |
| O           | 0.327            | 2.4385           | -1.2828          | O           | -1.3871          | 3.2747           | -0.1774          |
| H           | 4.2214           | -4.1361          | 0.0781           | H           | -3.0906          | -3.9784          | 1.9943           |
| H           | 4.0429           | -2.92            | -1.171           | H           | -3.5091          | -2.3247          | 2.3965           |
| H           | 1.8393           | -3.5965          | -0.267           | H           | -1.0606          | -2.5851          | 2.1326           |
| H           | 2.346            | -3.2342          | 1.3634           | H           | -1.2592          | -3.265           | 0.5376           |
| H           | 5.875            | -2.3301          | 0.3634           | H           | -5.0328          | -3.2177          | 0.6808           |

|             |                  |                  |                  |             |                  |                  |                  |
|-------------|------------------|------------------|------------------|-------------|------------------|------------------|------------------|
| H           | 4.8097           | -2.5003          | 1.7452           | H           | -3.6734          | -3.6813          | -0.3242          |
| H           | 1.4758           | 1.1663           | 0.757            | H           | -1.6726          | 0.8648           | -1.2606          |
| H           | 2.977            | 1.6567           | 1.4431           | H           | -3.0468          | 0.4232           | -2.2026          |
| H           | 2.5118           | 1.1131           | -1.5335          | H           | -3.1642          | 1.6065           | 0.6178           |
| H           | 4.7997           | 1.7029           | -1.9506          | H           | -5.5593          | 1.5206           | 0.51             |
| H           | 5.1203           | 1.9934           | -0.2519          | H           | -5.5441          | 0.8094           | -1.092           |
| H           | 5.9902           | -0.1769          | -0.8813          | H           | -5.9636          | -0.9137          | 0.556            |
| H           | 4.4753           | -0.6668          | -1.5789          | H           | -4.5757          | -0.4584          | 1.4979           |
| H           | 5.1857           | -0.4153          | 2.6948           | H           | -4.3316          | -2.5993          | -2.2686          |
| H           | 6.414            | -0.0779          | 1.4796           | H           | -5.8485          | -2.1339          | -1.5063          |
| H           | 5.1367           | 1.0974           | 1.7958           | H           | -4.864           | -0.9225          | -2.3291          |
| H           | -6.648           | 1.78             | 0.0896           | H           | 7.2408           | 0.1725           | 0.5809           |
| H           | -7.5419          | 1.0192           | 1.3965           | H           | 7.761            | 0.8109           | -0.9704          |
| H           | -7.3172          | -0.3419          | -0.7268          | H           | 6.9328           | -1.5839          | -0.9776          |
| H           | -6.8788          | -1.1791          | 0.7631           | H           | 6.225            | -0.5271          | -2.2003          |
| H           | -5.4813          | 2.0301           | 2.2875           | H           | 6.3389           | 2.4676           | 0.1681           |
| H           | -5.4603          | 0.2853           | 2.4722           | H           | 5.5901           | 1.9047           | -1.3157          |
| H           | -2.687           | -1.2459          | -1.3665          | H           | 2.3355           | -1.5149          | 0.2436           |
| H           | -2.3771          | 0.4676           | -1.2951          | H           | 2.7581           | -0.6748          | 1.7056           |
| H           | -1.9469          | -1.5744          | 0.9473           | H           | 1.5983           | 0.5861           | -0.8383          |
| H           | -0.8885          | 0.2627           | 2.2262           | H           | 1.4278           | 2.6749           | 0.4478           |
| H           | -1.1904          | 1.398            | 0.9232           | H           | 2.1632           | 1.9238           | 1.8574           |
| H           | -3.231           | -0.0949          | 2.6217           | H           | 3.4137           | 2.3728           | -0.8812          |
| H           | -2.8877          | 1.6261           | 2.6815           | H           | 3.8305           | 3.2116           | 0.6042           |
| H           | -3.8799          | 3.2051           | 0.9721           | H           | 5.3496           | 2.1397           | 2.3157           |
| H           | -2.8583          | 2.4409           | -0.2404          | H           | 4.0766           | 0.9666           | 2.6355           |
| H           | -4.5886          | 2.5769           | -0.5216          | H           | 5.6971           | 0.407            | 2.2482           |
| H           | -4.3334          | -2.0786          | -2.0153          | H           | 3.4531           | -2.7857          | -0.7271          |
| H           | 1.7701           | -0.7072          | 2.4288           | H           | -1.1113          | -1.5474          | -1.7015          |
| H           | 2.9796           | 5.1859           | -0.8258          | H           | -4.4642          | 4.37             | -2.208           |
| H           | 4.4251           | 4.1021           | -0.4956          | H           | -5.4765          | 2.8536           | -1.986           |
| H           | -0.3017          | -0.532           | -2.2785          | H           | -0.2325          | 1.5421           | 2.3377           |
| <b>2b-5</b> | <b>X axis(Å)</b> | <b>Y axis(Å)</b> | <b>Z axis(Å)</b> | <b>2b-6</b> | <b>X axis(Å)</b> | <b>Y axis(Å)</b> | <b>Z axis(Å)</b> |
| C           | 3.815            | -3.1534          | -0.1322          | C           | -3.1966          | -2.8899          | 1.6186           |
| C           | 2.3552           | -2.9475          | 0.2436           | C           | -1.7587          | -2.5181          | 1.289            |
| C           | 1.9266           | -1.483           | 0.1114           | C           | -1.6531          | -1.1277          | 0.6543           |
| C           | 2.8778           | -0.4992          | 0.8811           | C           | -2.6061          | -0.9492          | -0.5797          |
| C           | 4.4107           | -0.7625          | 0.6687           | C           | -4.071           | -1.471           | -0.3646          |
| C           | 4.73             | -2.2822          | 0.7176           | C           | -4.0765          | -2.8361          | 0.3771           |
| C           | 2.537            | 1.0001           | 0.6781           | C           | -2.6041          | 0.4821           | -1.1762          |
| C           | 3.0556           | 1.616            | -0.6353          | C           | -3.4852          | 1.5026           | -0.4302          |
| C           | 4.5569           | 1.3331           | -0.8159          | C           | -4.9092          | 0.956            | -0.2303          |
| C           | 4.8949           | -0.154           | -0.6704          | C           | -4.9187          | -0.4343          | 0.4122           |
| C           | 5.2608           | -0.1252          | 1.8096           | C           | -4.7848          | -1.7372          | -1.725           |
| O           | 0.5977           | -1.3779          | 0.7351           | O           | -0.2726          | -0.9992          | 0.159            |
| C           | 2.6666           | 3.0838           | -0.7197          | C           | -3.4132          | 2.86             | -1.1122          |
| C           | -6.2548          | 0.2899           | 1.5901           | C           | 6.2568           | 0.9006           | -1.2204          |

|   |         |         |         |   |         |         |         |
|---|---------|---------|---------|---|---------|---------|---------|
| C | -6.4768 | -0.4572 | 0.2809  | C | 6.0695  | -0.6066 | -1.3416 |
| C | -5.1954 | -0.6828 | -0.4852 | C | 4.7846  | -1.0853 | -0.709  |
| C | -4.0685 | 0.0384  | -0.2683 | C | 4.1022  | -0.3635 | 0.2133  |
| C | -4.0452 | 1.2346  | 0.7066  | C | 4.6545  | 0.9638  | 0.7753  |
| C | -5.4341 | 1.5415  | 1.3338  | C | 6.0619  | 1.3266  | 0.2238  |
| C | -2.6993 | -0.2742 | -0.855  | C | 2.7064  | -0.6929 | 0.7249  |
| C | -1.6851 | -0.6015 | 0.2657  | C | 1.7122  | 0.4299  | 0.3539  |
| C | -1.6423 | 0.5208  | 1.3203  | C | 2.2145  | 1.7997  | 0.8487  |
| C | -3.037  | 0.8958  | 1.8336  | C | 3.6519  | 2.0847  | 0.3971  |
| C | -3.6132 | 2.5347  | -0.016  | C | 4.812   | 0.8906  | 2.3144  |
| C | -5.2805 | -1.8051 | -1.471  | C | 4.3188  | -2.4067 | -1.235  |
| O | -6.2853 | -2.4953 | -1.6059 | O | 4.9157  | -3.0175 | -2.1154 |
| C | -0.2871 | -0.9002 | -0.2289 | C | 0.3185  | 0.0747  | 0.8197  |
| C | 1.5805  | -1.1697 | -1.3298 | C | -1.6619 | -0.0628 | 1.7323  |
| O | 2.6166  | -0.7457 | 2.2953  | O | -2.0306 | -1.7853 | -1.6277 |
| C | 3.4697  | 4.1458  | -0.5444 | C | -4.3545 | 3.4328  | -1.88   |
| O | 2.3144  | -1.2579 | -2.3028 | O | -2.5493 | 0.1619  | 2.5419  |
| C | 0.1901  | -0.7631 | -1.4625 | C | -0.4145 | 0.6851  | 1.746   |
| C | 1.2456  | 3.3839  | -1.0736 | C | -2.1767 | 3.6651  | -0.8748 |
| H | 0.9843  | 4.4527  | -1.1557 | H | -2.1468 | 4.6575  | -1.3558 |
| O | 0.407   | 2.5095  | -1.2611 | O | -1.2419 | 3.2613  | -0.1925 |
| H | 4.0792  | -4.2067 | 0.0204  | H | -3.2187 | -3.9059 | 2.0303  |
| H | 3.9738  | -2.9495 | -1.1959 | H | -3.5969 | -2.2349 | 2.399   |
| H | 1.7248  | -3.5917 | -0.3833 | H | -1.1516 | -2.5723 | 2.2021  |
| H | 2.1877  | -3.292  | 1.2727  | H | -1.33   | -3.2689 | 0.6119  |
| H | 5.7701  | -2.4562 | 0.413   | H | -5.103  | -3.1062 | 0.6569  |
| H | 4.6564  | -2.638  | 1.7545  | H | -3.7332 | -3.625  | -0.3062 |
| H | 1.455   | 1.1464  | 0.7737  | H | -1.5719 | 0.8449  | -1.253  |
| H | 2.9453  | 1.5749  | 1.522   | H | -2.9345 | 0.431   | -2.2239 |
| H | 2.5631  | 1.1331  | -1.4832 | H | -3.0876 | 1.6579  | 0.5761  |
| H | 4.8783  | 1.6721  | -1.8092 | H | -5.4807 | 1.6429  | 0.4071  |
| H | 5.1509  | 1.903   | -0.093  | H | -5.4462 | 0.9083  | -1.184  |
| H | 5.9832  | -0.2707 | -0.7604 | H | -5.9599 | -0.7773 | 0.4762  |
| H | 4.4795  | -0.6979 | -1.5207 | H | -4.5832 | -0.3503 | 1.4475  |
| H | 5.0564  | -0.5934 | 2.7791  | H | -4.3084 | -2.5521 | -2.2817 |
| H | 6.3322  | -0.2539 | 1.6145  | H | -5.8294 | -2.0303 | -1.5653 |
| H | 5.0769  | 0.9462  | 1.9258  | H | -4.7878 | -0.8611 | -2.379  |
| H | -7.2227 | 0.5606  | 2.0272  | H | 7.2629  | 1.1741  | -1.5583 |
| H | -5.7489 | -0.3579 | 2.3159  | H | 5.5489  | 1.4252  | -1.8732 |
| H | -7.1752 | 0.1008  | -0.3552 | H | 6.9115  | -1.1285 | -0.8703 |
| H | -6.9561 | -1.4123 | 0.5271  | H | 6.093   | -0.8534 | -2.4098 |
| H | -6.0146 | 2.1917  | 0.6644  | H | 6.8406  | 0.8369  | 0.8253  |
| H | -5.3161 | 2.1021  | 2.2698  | H | 6.2438  | 2.4047  | 0.3172  |
| H | -2.7224 | -1.1203 | -1.5447 | H | 2.327   | -1.6344 | 0.3234  |
| H | -2.3613 | 0.5775  | -1.4566 | H | 2.7351  | -0.842  | 1.8109  |
| H | -2.0423 | -1.5139 | 0.7662  | H | 1.6674  | 0.489   | -0.7441 |
| H | -1.0316 | 0.2077  | 2.177   | H | 1.5622  | 2.5944  | 0.4651  |

|             |                  |                  |                  |             |                  |                  |                  |
|-------------|------------------|------------------|------------------|-------------|------------------|------------------|------------------|
| H           | -1.149           | 1.4094           | 0.9084           | H           | 2.1614           | 1.8596           | 1.9421           |
| H           | -3.4162          | 0.058            | 2.4336           | H           | 3.6467           | 2.2292           | -0.6914          |
| H           | -2.9396          | 1.7457           | 2.5212           | H           | 3.9722           | 3.0402           | 0.832            |
| H           | -3.6468          | 3.3895           | 0.6701           | H           | 5.2442           | 1.8196           | 2.7049           |
| H           | -2.5972          | 2.4923           | -0.4175          | H           | 3.8669           | 0.7352           | 2.8416           |
| H           | -4.2819          | 2.7565           | -0.8564          | H           | 5.478            | 0.0679           | 2.6012           |
| H           | -4.4003          | -1.9856          | -2.1005          | H           | 3.4143           | -2.8344          | -0.7851          |
| H           | 1.6448           | -0.7834          | 2.396            | H           | -1.0735          | -1.588           | -1.6474          |
| H           | 3.115            | 5.1686           | -0.6368          | H           | -4.2292          | 4.4178           | -2.321           |
| H           | 4.52             | 4.0363           | -0.2945          | H           | -5.2923          | 2.9356           | -2.1056          |
| H           | -0.2688          | -0.4167          | -2.3685          | H           | -0.207           | 1.533            | 2.3703           |
| <b>2b-7</b> | <b>X axis(Å)</b> | <b>Y axis(Å)</b> | <b>Z axis(Å)</b> | <b>2b-8</b> | <b>X axis(Å)</b> | <b>Y axis(Å)</b> | <b>Z axis(Å)</b> |
| C           | -4.1886          | -2.6765          | 0.1661           | C           | -3.9577          | -2.9331          | -0.5328          |
| C           | -2.6732          | -2.8233          | 0.188            | C           | -2.582           | -2.8442          | 0.1279           |
| C           | -1.9688          | -1.4654          | 0.2599           | C           | -2.0205          | -1.41            | 0.231            |
| C           | -2.4435          | -0.4836          | -0.8691          | C           | -2.6576          | -0.429           | -0.8034          |
| C           | -3.9982          | -0.3986          | -1.0624          | C           | -4.2339          | -0.3814          | -0.7264          |
| C           | -4.6463          | -1.8097          | -0.9997          | C           | -4.8243          | -1.727           | -0.205           |
| C           | -1.816           | 0.9293           | -0.7819          | C           | -2.0218          | 0.9857           | -0.8531          |
| C           | -2.4725          | 1.8713           | 0.242            | C           | -2.5717          | 1.9947           | 0.1643           |
| C           | -3.9939          | 1.9351           | 0.0279           | C           | -4.0933          | 2.0975           | -0.0032          |
| C           | -4.6348          | 0.5415           | -0.0079          | C           | -4.7567          | 0.7422           | 0.2123           |
| C           | -4.3672          | 0.1616           | -2.4703          | C           | -4.8361          | -0.1221          | -2.1366          |
| O           | -0.5343          | -1.7112          | 0.0374           | O           | -0.5847          | -1.5105          | -0.0611          |
| C           | -1.7544          | 3.2102           | 0.2255           | C           | -1.8397          | 3.3225           | 0.0503           |
| C           | 6.3952           | 0.0713           | -0.8316          | C           | 6.4362           | -0.2345          | -0.8393          |
| C           | 5.724            | 1.3268           | -0.2863          | C           | 5.8309           | 1.0816           | -0.3664          |
| C           | 4.2306           | 1.1971           | -0.1584          | C           | 4.3277           | 1.0478           | -0.2149          |
| C           | 3.5654           | 0.0189           | -0.1781          | C           | 3.5982           | -0.095           | -0.2222          |
| C           | 4.3011           | -1.3209          | -0.3483          | C           | 4.2716           | -1.4806          | -0.315           |
| C           | 5.8359           | -1.1694          | -0.1479          | C           | 5.8076           | -1.4003          | -0.0934          |
| C           | 2.0566           | -0.0994          | -0.038           | C           | 2.0792           | -0.1638          | -0.1501          |
| C           | 1.6444           | -1.1126          | 1.0452           | C           | 1.5996           | -1.0601          | 1.0032           |
| C           | 2.2829           | -2.4808          | 0.7848           | C           | 2.1814           | -2.4717          | 0.8572           |
| C           | 3.8048           | -2.3554          | 0.6986           | C           | 3.7085           | -2.4256          | 0.7835           |
| C           | 4.0392           | -1.8567          | -1.7755          | C           | 4.0078           | -2.087           | -1.7134          |
| C           | 3.5408           | 2.5172           | -0.0359          | C           | 3.7235           | 2.4099           | -0.0619          |
| O           | 2.5567           | 2.8406           | -0.6894          | O           | 4.3878           | 3.4399           | -0.1233          |
| C           | 0.1442           | -1.2015          | 1.1384           | C           | 0.0961           | -1.0985          | 1.0785           |
| C           | -1.948           | -0.9715          | 1.6949           | C           | -1.9953          | -0.9446          | 1.672            |
| O           | -1.9128          | -1.0461          | -2.107           | O           | -2.2959          | -0.9943          | -2.1038          |
| C           | -2.1511          | 4.3306           | -0.3994          | C           | -2.2886          | 4.4442           | -0.5365          |
| O           | -2.9095          | -0.7694          | 2.4216           | O           | -2.9543          | -0.7812          | 2.4105           |
| C           | -0.5859          | -0.779           | 2.1652           | C           | -0.6311          | -0.7441          | 2.1335           |
| C           | -0.4749          | 3.2958           | 0.9959           | C           | -0.4936          | 3.4098           | 0.6903           |
| H           | 0.0915           | 4.2363           | 0.8875           | H           | 0.0038           | 4.3935           | 0.6393           |
| O           | -0.0752          | 2.3914           | 1.7216           | O           | 0.0451           | 2.4529           | 1.2354           |

|             |                  |                  |                  |             |                  |                  |                  |
|-------------|------------------|------------------|------------------|-------------|------------------|------------------|------------------|
| H           | -4.643           | -3.6702          | 0.0738           | H           | -4.4569          | -3.851           | -0.2003          |
| H           | -4.5521          | -2.2617          | 1.1117           | H           | -3.8458          | -3.0269          | -1.6192          |
| H           | -2.3813          | -3.4545          | 1.0374           | H           | -2.6523          | -3.2886          | 1.1297           |
| H           | -2.3413          | -3.3685          | -0.7054          | H           | -1.8918          | -3.4935          | -0.4264          |
| H           | -5.7396          | -1.7181          | -0.9671          | H           | -4.9525          | -1.6964          | 0.8843           |
| H           | -4.418           | -2.357           | -1.9247          | H           | -5.8318          | -1.8835          | -0.6109          |
| H           | -0.7403          | 0.8469           | -0.5921          | H           | -0.9317          | 0.9069           | -0.7691          |
| H           | -1.8607          | 1.3989           | -1.7754          | H           | -2.1729          | 1.3993           | -1.8621          |
| H           | -2.3403          | 1.4682           | 1.249            | H           | -2.3931          | 1.6247           | 1.18             |
| H           | -4.4547          | 2.5159           | 0.8371           | H           | -4.5027          | 2.8102           | 0.7238           |
| H           | -4.2378          | 2.4621           | -0.9008          | H           | -4.3563          | 2.4763           | -0.9978          |
| H           | -5.7068          | 0.6603           | -0.2137          | H           | -5.8417          | 0.8575           | 0.0883           |
| H           | -4.5838          | 0.1004           | 0.9893           | H           | -4.6202          | 0.4662           | 1.2617           |
| H           | -4.0468          | -0.5121          | -3.2731          | H           | -4.6659          | -0.9677          | -2.812           |
| H           | -5.4529          | 0.2795           | -2.5692          | H           | -5.9214          | 0.0242           | -2.0831          |
| H           | -3.9139          | 1.1361           | -2.6698          | H           | -4.4086          | 0.7703           | -2.6047          |
| H           | 6.2495           | 0.0087           | -1.9161          | H           | 6.2925           | -0.3476          | -1.9199          |
| H           | 7.4769           | 0.1332           | -0.6654          | H           | 7.519            | -0.2214          | -0.6689          |
| H           | 5.9775           | 2.1679           | -0.9433          | H           | 6.1274           | 1.8601           | -1.0798          |
| H           | 6.1376           | 1.5591           | 0.7033           | H           | 6.2686           | 1.351            | 0.6035           |
| H           | 6.3591           | -2.0598          | -0.5184          | H           | 6.2888           | -2.3369          | -0.4019          |
| H           | 6.0716           | -1.1011          | 0.9231           | H           | 6.0313           | -1.281           | 0.9757           |
| H           | 1.5985           | 0.859            | 0.2176           | H           | 1.616            | 0.8166           | -0.045           |
| H           | 1.6376           | -0.3851          | -1.0114          | H           | 1.7054           | -0.5451          | -1.1093          |
| H           | 2.0281           | -0.7451          | 2.0086           | H           | 1.9816           | -0.6335          | 1.9424           |
| H           | 2.0268           | -3.1737          | 1.5962           | H           | 1.8846           | -3.0899          | 1.7139           |
| H           | 1.8917           | -2.9268          | -0.1374          | H           | 1.7801           | -2.9682          | -0.0347          |
| H           | 4.1723           | -2.0742          | 1.6954           | H           | 4.0769           | -2.1034          | 1.7675           |
| H           | 4.2326           | -3.3428          | 0.483            | H           | 4.0893           | -3.4441          | 0.6338           |
| H           | 4.5778           | -2.7959          | -1.9466          | H           | 4.5264           | -3.0458          | -1.8291          |
| H           | 2.9787           | -2.0565          | -1.9591          | H           | 2.9454           | -2.2769          | -1.8955          |
| H           | 4.3647           | -1.1445          | -2.5417          | H           | 4.3543           | -1.4242          | -2.5138          |
| H           | 4.0225           | 3.2187           | 0.6661           | H           | 2.6439           | 2.4633           | 0.1206           |
| H           | -0.9698          | -1.2421          | -1.9393          | H           | -1.3347          | -1.1678          | -2.0771          |
| H           | -1.5779          | 5.2526           | -0.3602          | H           | -1.7084          | 5.3626           | -0.5647          |
| H           | -3.0622          | 4.3665           | -0.9871          | H           | -3.2584          | 4.4882           | -1.0221          |
| H           | -0.2956          | -0.3272          | 3.0946           | H           | -0.3358          | -0.3828          | 3.0999           |
| <b>2c-1</b> | <b>X axis(Å)</b> | <b>Y axis(Å)</b> | <b>Z axis(Å)</b> | <b>2c-2</b> | <b>X axis(Å)</b> | <b>Y axis(Å)</b> | <b>Z axis(Å)</b> |
| C           | -4.2084          | -2.7589          | 0.5418           | C           | 3.0818           | -3.4131          | -0.0549          |
| C           | -2.7314          | -2.8199          | 0.1807           | C           | 1.6688           | -2.8669          | 0.0836           |
| C           | -2.1026          | -1.4258          | 0.0957           | C           | 1.6221           | -1.3424          | -0.062           |
| C           | -2.8983          | -0.4596          | -0.8516          | C           | 2.6342           | -0.6096          | 0.8881           |
| C           | -4.4536          | -0.467           | -0.6444          | C           | 4.0756           | -1.2304          | 0.9233           |
| C           | -4.9866          | -1.9147          | -0.4586          | C           | 4.0169           | -2.7821          | 0.9676           |
| C           | -2.346           | 0.9891           | -0.8877          | C           | 2.6922           | 0.9266           | 0.6849           |
| C           | -2.777           | 1.8836           | 0.2904           | C           | 3.5603           | 1.3973           | -0.4979          |
| C           | -4.3041          | 1.8424           | 0.478            | C           | 4.961            | 0.7646           | -0.4362          |



|   |         |         |         |   |         |         |         |
|---|---------|---------|---------|---|---------|---------|---------|
| C | -4.852  | 0.4142  | 0.5644  | C | 4.9097  | -0.7595 | -0.2931 |
| C | -5.1973 | 0.0888  | -1.8969 | C | 4.8445  | -0.809  | 2.2125  |
| O | -0.7652 | -1.6002 | -0.4928 | O | 0.269   | -0.9274 | 0.3449  |
| C | -2.1915 | 3.2797  | 0.1348  | C | 3.5501  | 2.9154  | -0.5894 |
| C | 6.7401  | -0.161  | -0.5033 | C | -6.6481 | 0.8373  | 1.0913  |
| C | 5.9724  | 1.1435  | -0.6782 | C | -6.6086 | -0.0504 | -0.1456 |
| C | 4.5571  | 1.0982  | -0.1498 | C | -5.2445 | -0.6299 | -0.4435 |
| C | 3.9137  | -0.0514 | 0.1718  | C | -4.0957 | -0.1792 | 0.1192  |
| C | 4.5765  | -1.4302 | -0.0306 | C | -4.1009 | 1.0067  | 1.1086  |
| C | 5.8653  | -1.3406 | -0.8944 | C | -5.4521 | 1.7742  | 1.1019  |
| C | 2.5089  | -0.133  | 0.7518  | C | -2.7097 | -0.7633 | -0.1298 |
| C | 1.5883  | -1.0448 | -0.0816 | C | -1.681  | 0.3079  | -0.5343 |
| C | 2.1961  | -2.4496 | -0.1844 | C | -1.621  | 1.4295  | 0.5089  |
| C | 3.6071  | -2.3921 | -0.7715 | C | -3.004  | 2.038   | 0.7291  |
| C | 4.9495  | -2.0242 | 1.3483  | C | -3.8457 | 0.4727  | 2.5382  |
| C | 3.9445  | 2.4588  | -0.0078 | C | -5.2996 | -1.7722 | -1.4101 |
| O | 4.5236  | 3.4824  | -0.3591 | O | -6.3338 | -2.1086 | -1.9776 |
| C | 0.1661  | -1.1161 | 0.4221  | C | -0.3184 | -0.2983 | -0.7456 |
| C | -1.7341 | -0.9384 | 1.4825  | C | 1.6034  | -0.9607 | -1.5303 |
| O | -2.6677 | -0.9727 | -2.198  | O | 2.0872  | -0.7816 | 2.2302  |
| C | -2.8461 | 4.3983  | -0.2181 | C | 4.5387  | 3.7555  | -0.2421 |
| O | -2.4852 | -0.7622 | 2.4301  | O | 2.4573  | -1.209  | -2.3685 |
| C | -0.3018 | -0.7177 | 1.6012  | C | 0.373   | -0.2682 | -1.8799 |
| C | -0.7374 | 3.4417  | 0.4415  | C | 2.3224  | 3.5444  | -1.1643 |
| H | -0.3343 | 4.4642  | 0.344   | H | 2.3385  | 4.6441  | -1.2511 |
| O | -0.0197 | 2.5066  | 0.779   | O | 1.3463  | 2.8933  | -1.519  |
| H | -4.618  | -3.7761 | 0.5481  | H | 3.063   | -4.4988 | 0.0981  |
| H | -4.3436 | -2.3689 | 1.5557  | H | 3.4611  | -3.2537 | -1.0692 |
| H | -2.2024 | -3.4372 | 0.9186  | H | 1.0203  | -3.3453 | -0.6619 |
| H | -2.6069 | -3.343  | -0.7766 | H | 1.2546  | -3.1597 | 1.0576  |
| H | -6.0418 | -1.8893 | -0.1574 | H | 5.0235  | -3.199  | 0.8337  |
| H | -4.9617 | -2.4397 | -1.4234 | H | 3.6865  | -3.1074 | 1.9637  |
| H | -1.2531 | 0.9621  | -0.9745 | H | 1.6735  | 1.3231  | 0.5994  |
| H | -2.6626 | 1.4666  | -1.8264 | H | 3.0698  | 1.393   | 1.6064  |
| H | -2.3552 | 1.4892  | 1.2187  | H | 3.1204  | 1.0437  | -1.434  |
| H | -4.5762 | 2.3802  | 1.3954  | H | 5.518   | 1.0144  | -1.3484 |
| H | -4.8109 | 2.3638  | -0.3415 | H | 5.5398  | 1.1785  | 0.3967  |
| H | -5.9462 | 0.4692  | 0.6402  | H | 5.9389  | -1.1324 | -0.2058 |
| H | -4.5255 | -0.0365 | 1.5031  | H | 4.5287  | -1.1912 | -1.2204 |
| H | -5.0559 | -0.5546 | -2.7727 | H | 4.3754  | -1.2139 | 3.1163  |
| H | -6.2773 | 0.1444  | -1.7148 | H | 5.8737  | -1.1869 | 2.1925  |
| H | -4.862  | 1.0908  | -2.1777 | H | 4.8974  | 0.2759  | 2.3372  |
| H | 7.642   | -0.1412 | -1.1261 | H | -7.5781 | 1.4176  | 1.096   |
| H | 7.0798  | -0.2615 | 0.5339  | H | -6.6617 | 0.2204  | 1.997   |
| H | 5.9344  | 1.3995  | -1.7449 | H | -6.9337 | 0.5312  | -1.018  |
| H | 6.5432  | 1.9354  | -0.1778 | H | -7.3433 | -0.8523 | -0.0028 |
| H | 5.6039  | -1.233  | -1.9562 | H | -5.5172 | 2.4193  | 0.2148  |

|             |                  |                  |                  |             |                  |                  |                  |
|-------------|------------------|------------------|------------------|-------------|------------------|------------------|------------------|
| H           | 6.4441           | -2.2696          | -0.8168          | H           | -5.517           | 2.4429           | 1.9695           |
| H           | 2.5834           | -0.5051          | 1.7816           | H           | -2.3854          | -1.2777          | 0.7842           |
| H           | 2.0354           | 0.8448           | 0.8339           | H           | -2.7102          | -1.5299          | -0.9073          |
| H           | 1.5399           | -0.6171          | -1.0942          | H           | -2.015           | 0.7509           | -1.484           |
| H           | 2.2166           | -2.9322          | 0.8004           | H           | -1.2197          | 1.0593           | 1.4601           |
| H           | 1.5748           | -3.0863          | -0.827           | H           | -0.9355          | 2.2176           | 0.1728           |
| H           | 4.0266           | -3.4062          | -0.7907          | H           | -2.933           | 2.813            | 1.5031           |
| H           | 3.5142           | -2.0806          | -1.8213          | H           | -3.291           | 2.5559           | -0.1967          |
| H           | 5.6017           | -1.3513          | 1.9157           | H           | -4.5901          | -0.2764          | 2.8296           |
| H           | 4.072            | -2.2182          | 1.9728           | H           | -2.8642          | -6.00E-04        | 2.6407           |
| H           | 5.4765           | -2.9786          | 1.2346           | H           | -3.8875          | 1.2846           | 3.2734           |
| H           | 2.938            | 2.5171           | 0.424            | H           | -4.3657          | -2.3145          | -1.6011          |
| H           | -1.7088          | -1.1503          | -2.2674          | H           | 1.1338           | -0.5744          | 2.1696           |
| H           | -2.3542          | 5.3643           | -0.2938          | H           | 4.456            | 4.8331           | -0.3537          |
| H           | -3.9054          | 4.395            | -0.453           | H           | 5.4748           | 3.3993           | 0.1753           |
| H           | 0.1907           | -0.2913          | 2.454            | H           | 0.139            | 0.1633           | -2.8344          |
| <b>2c-3</b> | <b>X axis(Å)</b> | <b>Y axis(Å)</b> | <b>Z axis(Å)</b> | <b>2c-4</b> | <b>X axis(Å)</b> | <b>Y axis(Å)</b> | <b>Z axis(Å)</b> |
| C           | 4.1266           | -2.5594          | -1.1136          | C           | -4.1439          | -2.8144          | 0.4013           |
| C           | 2.6058           | -2.6022          | -1.1381          | C           | -2.657           | -2.8416          | 0.0781           |
| C           | 1.9853           | -1.2669          | -0.7153          | C           | -2.0484          | -1.4362          | 0.0565           |
| C           | 2.5372           | -0.7513          | 0.6608           | C           | -2.8333          | -0.452           | -0.8811          |
| C           | 4.0964           | -0.8344          | 0.82             | C           | -4.393           | -0.4879          | -0.7158          |
| C           | 4.6447           | -2.1787          | 0.2668           | C           | -4.9089          | -1.9484          | -0.5907          |
| C           | 2.0079           | 0.6473           | 1.0697           | C           | -2.302           | 1.0046           | -0.8576          |
| C           | 2.7235           | 1.837            | 0.4017           | C           | -2.7756          | 1.8546           | 0.3368           |
| C           | 4.2487           | 1.7207           | 0.5675           | C           | -4.3063          | 1.7862           | 0.4833           |
| C           | 4.7874           | 0.3593           | 0.1166           | C           | -4.8358          | 0.3486           | 0.5093           |
| C           | 4.5175           | -0.8031          | 2.3208           | C           | -5.1121          | 0.0975           | -1.9693          |
| O           | 0.5439           | -1.5105          | -0.538           | O           | -0.6926          | -1.5695          | -0.4995          |
| C           | 2.1267           | 3.1505           | 0.8833           | C           | -2.2062          | 3.2626           | 0.2403           |
| C           | -6.4825          | 0.2543           | 0.532            | C           | 6.1571           | -0.2237          | -1.4822          |
| C           | -5.7511          | -0.6829          | 1.4839           | C           | 5.8162           | 1.1358           | -0.8835          |
| C           | -4.2493          | -0.6893          | 1.3097           | C           | 4.506            | 1.1276           | -0.1339          |
| C           | -3.6145          | -0.1683          | 0.2301           | C           | 3.9291           | -0.0092          | 0.3262           |
| C           | -4.4063          | 0.4547           | -0.9388          | C           | 4.6196           | -1.3839          | 0.2059           |
| C           | -5.9213          | 0.1157           | -0.8729          | C           | 6.0413           | -1.3             | -0.4167          |
| C           | -2.1023          | -0.1191          | 0.0401           | C           | 2.5255           | -0.102           | 0.9023           |
| C           | -1.6466          | -0.7103          | -1.3095          | C           | 1.6372           | -0.9791          | -0.007           |
| C           | -2.3729          | -0.0082          | -2.4666          | C           | 2.2628           | -2.3704          | -0.207           |
| C           | -3.888           | -0.0948          | -2.2944          | C           | 3.72             | -2.2843          | -0.6823          |
| C           | -4.2445          | 1.9931           | -0.8973          | C           | 4.8059           | -2.0384          | 1.5969           |
| C           | -3.536           | -1.314           | 2.4689           | C           | 3.8837           | 2.4836           | 3.00E-04         |
| O           | -4.1299          | -1.841           | 3.4041           | O           | 4.3957           | 3.4959           | -0.4679          |
| C           | -0.1386          | -0.6735          | -1.4176          | C           | 0.2044           | -1.0984          | 0.4557           |
| C           | 1.9633           | -0.3105          | -1.8906          | C           | -1.7265          | -0.9903          | 1.4687           |
| O           | 1.9805           | -1.6588          | 1.6587           | O           | -2.5598          | -0.9191          | -2.2363          |
| C           | 2.6772           | 4.0246           | 1.7417           | C           | -2.8682          | 4.3834           | -0.0912          |

|             |                  |                  |                  |             |                  |                  |                  |
|-------------|------------------|------------------|------------------|-------------|------------------|------------------|------------------|
| O           | 2.9228           | 0.1112           | -2.519           | O           | -2.5059          | -0.8581          | 2.4004           |
| C           | 0.6017           | 0.0502           | -2.2521          | C           | -0.302           | -0.7502          | 1.6347           |
| C           | 0.7997           | 3.535            | 0.3131           | C           | -0.7615          | 3.4336           | 0.5846           |
| H           | 0.393            | 4.5045           | 0.6477           | H           | -0.3697          | 4.4634           | 0.5257           |
| O           | 0.1845           | 2.8263           | -0.4756          | O           | -0.0395          | 2.4982           | 0.912            |
| H           | 4.5173           | -3.5478          | -1.3833          | H           | -4.5377          | -3.837           | 0.3628           |
| H           | 4.5068           | -1.864           | -1.8687          | H           | -4.3118          | -2.4607          | 1.4235           |
| H           | 2.2669           | -2.8837          | -2.1436          | H           | -2.1381          | -3.4754          | 0.809            |
| H           | 2.2489           | -3.4035          | -0.4776          | H           | -2.499           | -3.3304          | -0.8924          |
| H           | 5.7418           | -2.153           | 0.2401           | H           | -5.9717          | -1.9476          | -0.3162          |
| H           | 4.3794           | -2.9927          | 0.9554           | H           | -4.8518          | -2.441           | -1.5712          |
| H           | 0.927            | 0.6954           | 0.8929           | H           | -2.6022          | 1.5073           | -1.7884          |
| H           | 2.0908           | 0.7541           | 2.1611           | H           | -1.2071          | 0.9958           | -0.9177          |
| H           | 2.5426           | 1.811            | -0.676           | H           | -2.3717          | 1.4365           | 1.2629           |
| H           | 4.7432           | 2.5067           | -0.0176          | H           | -4.6095          | 2.2901           | 1.41             |
| H           | 4.5409           | 1.8881           | 1.61             | H           | -4.7994          | 2.327            | -0.332           |
| H           | 5.8673           | 0.3335           | 0.3141           | H           | -5.9323          | 0.3863           | 0.5573           |
| H           | 4.6956           | 0.2816           | -0.9682          | H           | -4.528           | -0.1278          | 1.4416           |
| H           | 4.1613           | -1.6871          | 2.8617           | H           | -4.9377          | -0.5148          | -2.8612          |
| H           | 5.6097           | -0.7903          | 2.418            | H           | -6.1972          | 0.1312           | -1.8145          |
| H           | 4.1327           | 0.073            | 2.8495           | H           | -4.7852          | 1.1129           | -2.2085          |
| H           | -7.5524          | 0.0155           | 0.5329           | H           | 5.4902           | -0.4455          | -2.3239          |
| H           | -6.3945          | 1.2893           | 0.8814           | H           | 7.1772           | -0.203           | -1.8826          |
| H           | -6.1191          | -1.7065          | 1.336            | H           | 5.7889           | 1.858            | -1.7082          |
| H           | -6.0175          | -0.391           | 2.5072           | H           | 6.6126           | 1.4553           | -0.1999          |
| H           | -6.094           | -0.9162          | -1.2085          | H           | 6.3313           | -2.2697          | -0.8405          |
| H           | -6.4875          | 0.7574           | -1.5597          | H           | 6.7821           | -1.0786          | 0.3645           |
| H           | -1.7778          | 0.9261           | 0.1189           | H           | 2.0511           | 0.8731           | 1.0109           |
| H           | -1.5699          | -0.6432          | 0.8357           | H           | 2.5738           | -0.5082          | 1.9191           |
| H           | -1.9395          | -1.7702          | -1.3349          | H           | 1.6034           | -0.4858          | -0.9904          |
| H           | -2.0705          | 1.0434           | -2.5376          | H           | 2.2082           | -2.9474          | 0.7243           |
| H           | -2.0992          | -0.4775          | -3.4201          | H           | 1.6875           | -2.9379          | -0.9497          |
| H           | -4.3713          | 0.437            | -3.1242          | H           | 4.1333           | -3.2999          | -0.7305          |
| H           | -4.1758          | -1.1502          | -2.3985          | H           | 3.7187           | -1.9051          | -1.7128          |
| H           | -3.2056          | 2.3108           | -1.0304          | H           | 3.862            | -2.2642          | 2.1004           |
| H           | -4.8291          | 2.4703           | -1.6923          | H           | 5.3518           | -2.9856          | 1.5103           |
| H           | -4.5822          | 2.41             | 0.0579           | H           | 5.3795           | -1.3842          | 2.2644           |
| H           | -2.4399          | -1.2873          | 2.4592           | H           | 2.9408           | 2.5514           | 0.557            |
| H           | 1.0412           | -1.7904          | 1.4241           | H           | -1.5965          | -1.0785          | -2.2863          |
| H           | 2.1885           | 4.9528           | 2.0247           | H           | -2.3881          | 5.3577           | -0.1247          |
| H           | 3.6423           | 3.8452           | 2.2042           | H           | -3.9218          | 4.3739           | -0.3501          |
| H           | 0.3282           | 0.759            | -3.0101          | H           | 0.1588           | -0.3426          | 2.514            |
| <b>2c-5</b> | <b>X axis(Å)</b> | <b>Y axis(Å)</b> | <b>Z axis(Å)</b> | <b>2c-6</b> | <b>X axis(Å)</b> | <b>Y axis(Å)</b> | <b>Z axis(Å)</b> |
| C           | 3.1685           | -3.3649          | -0.1389          | C           | 3.9903           | -2.5295          | -1.4208          |
| C           | 1.7411           | -2.8704          | 0.0394           | C           | 2.4688           | -2.5133          | -1.4047          |
| C           | 1.6383           | -1.3465          | -0.0818          | C           | 1.913            | -1.204           | -0.836           |
| C           | 2.646            | -0.5925          | 0.8561           | C           | 2.5197           | -0.8477          | 0.5673           |

|   |         |         |         |   |         |         |         |
|---|---------|---------|---------|---|---------|---------|---------|
| C | 4.1085  | -1.1631 | 0.8497  | C | 4.0779  | -1.003  | 0.6717  |
| C | 4.1044  | -2.7164 | 0.872   | C | 4.5585  | -2.3055 | -0.0258 |
| C | 2.6464  | 0.9476  | 0.6746  | C | 2.0564  | 0.5219  | 1.1268  |
| C | 3.4707  | 1.465   | -0.5199 | C | 2.7998  | 1.7449  | 0.5567  |
| C | 4.8934  | 0.8805  | -0.4991 | C | 4.3231  | 1.5576  | 0.665   |
| C | 4.8977  | -0.6463 | -0.378  | C | 4.7967  | 0.2284  | 0.0682  |
| C | 4.8916  | -0.7336 | 2.1275  | C | 4.5385  | -1.1352 | 2.1554  |
| O | 0.2814  | -0.9852 | 0.3619  | O | 0.468   | -1.4092 | -0.6418 |
| C | 3.4063  | 2.983   | -0.5884 | C | 2.2672  | 3.0254  | 1.1815  |
| C | -6.3032 | 1.4907  | 0.3994  | C | -6.4095 | -0.533  | -0.128  |
| C | -6.5124 | 0.1255  | -0.2443 | C | -5.7919 | -0.9815 | 1.1907  |
| C | -5.2206 | -0.633  | -0.4322 | C | -4.2881 | -0.8463 | 1.2041  |
| C | -4.0871 | -0.3426 | 0.2515  | C | -3.6113 | -0.0435 | 0.3469  |
| C | -4.0647 | 0.719   | 1.3729  | C | -4.3437 | 0.8901  | -0.6397 |
| C | -5.4606 | 1.3427  | 1.654   | C | -5.8908 | 0.8463  | -0.494  |
| C | -2.7122 | -0.9249 | -0.0442 | C | -2.0988 | -0.0231 | 0.1735  |
| C | -1.73   | 0.1928  | -0.4526 | C | -1.7067 | -0.448  | -1.2602 |
| C | -1.6814 | 1.3222  | 0.5898  | C | -2.4374 | 0.411   | -2.3103 |
| C | -3.0809 | 1.8381  | 0.9427  | C | -3.9519 | 0.4509  | -2.0742 |
| C | -3.6029 | 0.0971  | 2.7142  | C | -3.9411 | 2.3678  | -0.4079 |
| C | -5.3033 | -1.7036 | -1.4741 | C | -3.6214 | -1.7169 | 2.2221  |
| O | -6.3123 | -1.9033 | -2.142  | O | -4.2444 | -2.4826 | 2.9501  |
| C | -0.3525 | -0.361  | -0.7051 | C | -0.202  | -0.4616 | -1.4125 |
| C | 1.5722  | -0.9445 | -1.5433 | C | 1.9002  | -0.1364 | -1.9113 |
| O | 2.1362  | -0.8023 | 2.2074  | O | 1.9535  | -1.8285 | 1.4874  |
| C | 4.3729  | 3.8518  | -0.2503 | C | 2.8751  | 3.7922  | 2.1015  |
| O | 2.4145  | -1.1507 | -2.4043 | O | 2.8595  | 0.3079  | -2.5242 |
| C | 0.3108  | -0.2905 | -1.8543 | C | 0.5459  | 0.3115  | -2.1941 |
| C | 2.1451  | 3.5771  | -1.1268 | C | 0.9396  | 3.5097  | 0.6946  |
| H | 2.1214  | 4.6777  | -1.1976 | H | 0.5799  | 4.4555  | 1.134   |
| O | 1.1843  | 2.8974  | -1.4695 | O | 0.2751  | 2.9032  | -0.1382 |
| H | 3.5188  | -3.1777 | -1.159  | H | 4.3343  | -3.5005 | -1.7965 |
| H | 3.1908  | -4.4526 | -0.0021 | H | 4.3783  | -1.778  | -2.1157 |
| H | 1.0926  | -3.3604 | -0.6986 | H | 2.0934  | -2.6819 | -2.4224 |
| H | 1.3597  | -3.1914 | 1.0179  | H | 2.0973  | -3.3619 | -0.815  |
| H | 5.1214  | -3.096  | 0.7093  | H | 5.6547  | -2.3173 | -0.0824 |
| H | 3.8081  | -3.0672 | 1.8702  | H | 4.2794  | -3.173  | 0.5879  |
| H | 1.6129  | 1.3096  | 0.6176  | H | 0.9739  | 0.626   | 0.9886  |
| H | 3.0285  | 1.4138  | 1.5944  | H | 2.1725  | 0.5174  | 2.2203  |
| H | 3.022   | 1.1097  | -1.4512 | H | 2.5899  | 1.8319  | -0.5125 |
| H | 5.4205  | 1.1625  | -1.4196 | H | 4.8326  | 2.3788  | 0.1446  |
| H | 5.4765  | 1.3023  | 0.3268  | H | 4.6485  | 1.611   | 1.7098  |
| H | 5.9408  | -0.9845 | -0.3195 | H | 5.8795  | 0.144   | 0.2308  |
| H | 4.5104  | -1.0776 | -1.3028 | H | 4.6747  | 0.2612  | -1.0158 |
| H | 4.4577  | -1.1676 | 3.0354  | H | 4.1614  | -2.0543 | 2.6179  |
| H | 5.9326  | -1.075  | 2.0788  | H | 5.6324  | -1.1726 | 2.221   |
| H | 4.9098  | 0.3505  | 2.2674  | H | 4.2027  | -0.3017 | 2.7781  |

|             |                  |                  |                  |             |                  |                  |                  |
|-------------|------------------|------------------|------------------|-------------|------------------|------------------|------------------|
| H           | -5.8193          | 2.1741           | -0.3083          | H           | -6.1757          | -1.253           | -0.9213          |
| H           | -7.2749          | 1.9306           | 0.6515           | H           | -7.5011          | -0.5088          | -0.033           |
| H           | -7.0098          | 0.2911           | -1.2074          | H           | -6.0903          | -2.0241          | 1.353            |
| H           | -7.1908          | -0.4788          | 0.3706           | H           | -6.2072          | -0.3934          | 2.0186           |
| H           | -5.3524          | 2.3195           | 2.142            | H           | -6.3725          | 1.1871           | -1.4191          |
| H           | -6.0196          | 0.7133           | 2.3608           | H           | -6.2158          | 1.545            | 0.2897           |
| H           | -2.3499          | -1.4694          | 0.8357           | H           | -1.715           | 0.9779           | 0.4011           |
| H           | -2.7285          | -1.6649          | -0.8473          | H           | -1.5905          | -0.6836          | 0.8785           |
| H           | -2.1032          | 0.6317           | -1.39            | H           | -2.0451          | -1.4845          | -1.4074          |
| H           | -1.1729          | 0.9865           | 1.5017           | H           | -2.0468          | 1.4355           | -2.3116          |
| H           | -1.0842          | 2.1576           | 0.2028           | H           | -2.2486          | 0.0087           | -3.3138          |
| H           | -2.9872          | 2.5863           | 1.7403           | H           | -4.4031          | 1.1264           | -2.8122          |
| H           | -3.4802          | 2.3695           | 0.0687           | H           | -4.3578          | -0.5477          | -2.2832          |
| H           | -2.5827          | -0.2949          | 2.6831           | H           | -2.8784          | 2.5614           | -0.5769          |
| H           | -3.632           | 0.8425           | 3.518            | H           | -4.4955          | 3.0313           | -1.0823          |
| H           | -4.257           | -0.7331          | 3.0069           | H           | -4.1634          | 2.6775           | 0.6203           |
| H           | -4.417           | -2.3354          | -1.6129          | H           | -2.5315          | -1.6344          | 2.3151           |
| H           | 1.1751           | -0.6275          | 2.1712           | H           | 1.004            | -1.9017          | 1.2687           |
| H           | 4.2508           | 4.9274           | -0.3438          | H           | 2.4302           | 4.705            | 2.4881           |
| H           | 5.3299           | 3.5225           | 0.1412           | H           | 3.8459           | 3.5354           | 2.5128           |
| H           | 0.0396           | 0.1462           | -2.7966          | H           | 0.2835           | 1.1027           | -2.87            |
| <b>2c-7</b> | <b>X axis(Å)</b> | <b>Y axis(Å)</b> | <b>Z axis(Å)</b> | <b>2c-8</b> | <b>X axis(Å)</b> | <b>Y axis(Å)</b> | <b>Z axis(Å)</b> |
| C           | 3.0485           | -3.3772          | -0.0344          | C           | -2.7164          | -3.5236          | -0.4007          |
| C           | 1.6323           | -2.8413          | 0.1111           | C           | -1.3495          | -2.8577          | -0.4473          |
| C           | 1.5741           | -1.3169          | -0.0335          | C           | -1.4121          | -1.382           | -0.0388          |
| C           | 2.5851           | -0.5781          | 0.9126           | C           | -2.492           | -0.5749          | -0.8396          |
| C           | 4.0309           | -1.1886          | 0.9423           | C           | -3.8859          | -1.2856          | -0.9724          |
| C           | 3.9834           | -2.7408          | 0.9851           | C           | -3.7129          | -2.7958          | -1.2935          |
| C           | 2.6304           | 0.9587           | 0.7112           | C           | -2.6545          | 0.8964           | -0.3744          |
| C           | 3.4923           | 1.4389           | -0.4723          | C           | -3.5573          | 1.0903           | 0.8582           |
| C           | 4.8969           | 0.8136           | -0.4181          | C           | -4.8985          | 0.3545           | 0.7327           |
| C           | 4.8574           | -0.7107          | -0.2763          | C           | -4.7278          | -1.1078          | 0.3145           |
| C           | 4.8011           | -0.763           | 2.2293           | C           | -4.7107          | -0.6985          | -2.1571          |
| O           | 0.222            | -0.9109          | 0.3826           | O           | -0.1013          | -0.7994          | -0.3792          |
| C           | 3.4757           | 2.9577           | -0.5565          | C           | -3.7311          | 2.5529           | 1.2243           |
| C           | -6.7502          | 0.6468           | 1.0589           | C           | 6.7465           | 1.2692           | -0.9134          |
| C           | -6.6605          | -0.194           | -0.2098          | C           | 6.7597           | 0.1397           | 0.1082           |
| C           | -5.272           | -0.6992          | -0.4982          | C           | 5.4167           | -0.5259          | 0.3042           |
| C           | -4.1564          | -0.2554          | 0.1252           | C           | 4.2432           | 0.0058           | -0.1194          |
| C           | -4.2072          | 0.9001           | 1.1399           | C           | 4.1966           | 1.3752           | -0.8322          |
| C           | -5.5842          | 1.6233           | 1.1288           | C           | 5.5328           | 2.1571           | -0.6963          |
| C           | -2.7635          | -0.828           | -0.0968          | C           | 2.8774           | -0.6528          | 0.0362           |
| C           | -1.7621          | 0.2642           | -0.5041          | C           | 1.8425           | 0.2833           | 0.6868           |
| C           | -1.7332          | 1.3866           | 0.5447           | C           | 1.7285           | 1.5986           | -0.0919          |
| C           | -3.1316          | 1.9613           | 0.7795           | C           | 3.0923           | 2.2746           | -0.2137          |
| C           | -3.9526          | 0.3518           | 2.5631           | C           | 3.9085           | 1.1512           | -2.3359          |
| C           | -5.2414          | -1.7549          | -1.553           | C           | 5.5226           | -1.8502          | 0.9943           |

|   |         |         |         |   |         |         |         |
|---|---------|---------|---------|---|---------|---------|---------|
| O | -4.4307 | -1.7756 | -2.4699 | O | 6.5693  | -2.2556 | 1.4888  |
| C | -0.3853 | -0.3087 | -0.7125 | C | 0.4967  | -0.3836 | 0.802   |
| C | 1.5461  | -0.936  | -1.502  | C | -1.3832 | -1.2601 | 1.4738  |
| O | 2.0446  | -0.7545 | 2.2575  | O | -1.9568 | -0.4823 | -2.1941 |
| C | 4.4643  | 3.8003  | -0.2151 | C | -3.2858 | 3.0753  | 2.3798  |
| O | 2.408   | -1.1622 | -2.3385 | O | -2.2155 | -1.6666 | 2.27    |
| C | 0.2989  | -0.2751 | -1.8513 | C | -0.1666 | -0.604  | 1.9314  |
| C | 2.2406  | 3.5855  | -1.1163 | C | -4.4263 | 3.4892  | 0.2971  |
| H | 2.253   | 4.6855  | -1.1991 | H | -4.5225 | 4.53    | 0.6505  |
| O | 1.2624  | 2.9339  | -1.4633 | O | -4.8693 | 3.1532  | -0.7931 |
| H | 3.0383  | -4.4631 | 0.1171  | H | -2.6215 | -4.5616 | -0.7409 |
| H | 3.4222  | -3.2134 | -1.0502 | H | -3.0876 | -3.571  | 0.6281  |
| H | 0.9838  | -3.3242 | -0.6316 | H | -0.6557 | -3.4087 | 0.201   |
| H | 1.2248  | -3.1376 | 1.0869  | H | -0.9314 | -2.9456 | -1.4589 |
| H | 4.9924  | -3.1504 | 0.8465  | H | -4.6832 | -3.3055 | -1.2325 |
| H | 3.6594  | -3.0695 | 1.9821  | H | -3.376  | -2.913  | -2.3327 |
| H | 1.608   | 1.3465  | 0.6278  | H | -1.6697 | 1.3429  | -0.1857 |
| H | 3.0057  | 1.427   | 1.6327  | H | -3.0441 | 1.4815  | -1.217  |
| H | 3.05    | 1.0877  | -1.4083 | H | -3.0448 | 0.6279  | 1.7068  |
| H | 5.4483  | 1.0683  | -1.3324 | H | -5.425  | 0.3855  | 1.6955  |
| H | 5.4771  | 1.2299  | 0.4127  | H | -5.5596 | 0.8568  | 0.0188  |
| H | 5.8897  | -1.0758 | -0.1923 | H | -5.7255 | -1.5436 | 0.1706  |
| H | 4.4775  | -1.1449 | -1.2027 | H | -4.293  | -1.6658 | 1.1457  |
| H | 4.3383  | -1.1725 | 3.1343  | H | -4.2307 | -0.893  | -3.1229 |
| H | 5.8331  | -1.1331 | 2.2053  | H | -5.7074 | -1.1537 | -2.2006 |
| H | 4.8463  | 0.3221  | 2.3551  | H | -4.849  | 0.3831  | -2.0786 |
| H | -7.6989 | 1.1959  | 1.0678  | H | 7.6645  | 1.8605  | -0.8175 |
| H | -6.7579 | -0.0039 | 1.941   | H | 6.7457  | 0.858   | -1.9293 |
| H | -6.9933 | 0.4074  | -1.0655 | H | 7.0945  | 0.5324  | 1.077   |
| H | -7.3613 | -1.0325 | -0.1178 | H | 7.5077  | -0.594  | -0.2166 |
| H | -5.6523 | 2.2962  | 0.2629  | H | 5.6114  | 2.6018  | 0.3054  |
| H | -5.6898 | 2.2595  | 2.0165  | H | 5.5595  | 2.9953  | -1.4039 |
| H | -2.4386 | -1.3124 | 0.8335  | H | 2.5342  | -0.9709 | -0.9567 |
| H | -2.7478 | -1.6272 | -0.8423 | H | 2.9172  | -1.5648 | 0.6354  |
| H | -2.1055 | 0.7005  | -1.4536 | H | 2.1984  | 0.5228  | 1.6997  |
| H | -1.3195 | 1.0228  | 1.4932  | H | 1.3054  | 1.4282  | -1.0893 |
| H | -1.0693 | 2.1936  | 0.2099  | H | 1.038   | 2.2793  | 0.4223  |
| H | -3.0769 | 2.7234  | 1.5674  | H | 2.9828  | 3.1941  | -0.8031 |
| H | -3.4299 | 2.4895  | -0.1368 | H | 3.3977  | 2.5915  | 0.7933  |
| H | -2.955  | -0.0844 | 2.6736  | H | 2.934   | 0.685   | -2.5116 |
| H | -4.0356 | 1.1492  | 3.3107  | H | 3.9114  | 2.1019  | -2.8816 |
| H | -4.6731 | -0.429  | 2.8301  | H | 4.6587  | 0.5012  | -2.7994 |
| H | -6.0454 | -2.5062 | -1.4771 | H | 4.6148  | -2.4637 | 1.0455  |
| H | 1.0873  | -0.5642 | 2.1957  | H | -1.0333 | -0.1759 | -2.113  |
| H | 4.376   | 4.878   | -0.321  | H | -3.4161 | 4.1215  | 2.6408  |
| H | 5.406   | 3.4463  | 0.1913  | H | -2.7769 | 2.4575  | 3.1147  |
| H | 0.0435  | 0.1352  | -2.8095 | H | 0.0863  | -0.384  | 2.951   |

| 2d-1 | X axis(Å) | Y axis(Å) | Z axis(Å) | 2d-2 | X axis(Å) | Y axis(Å) | Z axis(Å) |
|------|-----------|-----------|-----------|------|-----------|-----------|-----------|
| C    | 3.0609    | -2.7955   | -1.0405   | C    | 3.0145    | -2.8753   | -0.8589   |
| C    | 2.9008    | -2.5322   | 0.4517    | C    | 2.8029    | -2.5461   | 0.6138    |
| C    | 2.3561    | -1.1193   | 0.6989    | C    | 2.2928    | -1.1089   | 0.7812    |
| C    | 3.29      | -0.0198   | 0.0781    | C    | 3.285     | -0.064    | 0.1565    |
| C    | 3.5865    | -0.2857   | -1.4461   | C    | 3.6341    | -0.4007   | -1.3424   |
| C    | 3.9865    | -1.7706   | -1.6845   | C    | 3.9965    | -1.9054   | -1.5047   |
| C    | 2.7679    | 1.4261    | 0.282     | C    | 2.8005    | 1.4038    | 0.2811    |
| C    | 1.5892    | 1.8325    | -0.6211   | C    | 1.6721    | 1.807     | -0.6853   |
| C    | 1.8855    | 1.525     | -2.0989   | C    | 2.018     | 1.4316    | -2.1363   |
| C    | 2.3562    | 0.0837    | -2.3138   | C    | 2.452     | -0.0305   | -2.2746   |
| C    | 4.8001    | 0.553     | -1.9459   | C    | 4.8925    | 0.3804    | -1.8243   |
| O    | 0.9941    | -1.0881   | 0.2095    | O    | 0.9536    | -1.0582   | 0.234     |
| C    | 1.1852    | 3.2722    | -0.3411   | C    | 1.301     | 3.2674    | -0.4781   |
| C    | -6.0376   | -0.569    | -1.1293   | C    | -6.0785   | -0.9472   | -0.1651   |
| C    | -5.7002   | 0.6515    | -0.2818   | C    | -5.7438   | 0.5395    | -0.1694   |
| C    | -4.233    | 0.78      | 0.0585    | C    | -4.264    | 0.7994    | -0.0222   |
| C    | -3.3322   | -0.2185   | -0.1158   | C    | -3.3221   | -0.1336   | -0.3025   |
| C    | -3.7601   | -1.6077   | -0.6332   | C    | -3.6883   | -1.5124   | -0.8918   |
| C    | -5.3025   | -1.7923   | -0.6065   | C    | -5.2081   | -1.6729   | -1.1761   |
| C    | -1.8374   | -0.1028   | 0.1477    | C    | -1.8386   | 0.0043    | -2.00E-04 |
| C    | -1.3193   | -1.2069   | 1.083     | C    | -1.3956   | -1.0689   | 1.0127    |
| C    | -1.6578   | -2.5917   | 0.5166    | C    | -1.7619   | -2.4831   | 0.5305    |
| C    | -3.1598   | -2.7248   | 0.2644    | C    | -3.2391   | -2.5905   | 0.13      |
| C    | -3.2679   | -1.7844   | -2.0893   | C    | -2.9785   | -1.7447   | -2.2488   |
| C    | -3.8749   | 2.1324    | 0.5958    | C    | -3.948    | 2.1633    | 0.509     |
| O    | -4.6933   | 3.0415    | 0.6946    | O    | -4.8144   | 3.0066    | 0.7191    |
| C    | 0.1625    | -1.0821   | 1.3292    | C    | 0.0778    | -0.9784   | 1.3164    |
| C    | 2.1523    | -0.9105   | 2.1839    | C    | 2.0354    | -0.832    | 2.2465    |
| O    | 4.5708    | -0.0896   | 0.7535    | O    | 4.5347    | -0.1438   | 0.8867    |
| C    | 1.4644    | 4.3519    | -1.0894   | C    | 1.6483    | 4.3088    | -1.2519   |
| O    | 3.0337    | -0.7267   | 3.0122    | O    | 2.8879    | -0.6414   | 3.1031    |
| C    | 0.7397    | -0.9557   | 2.5223    | C    | 0.6094    | -0.8183   | 2.5264    |
| C    | 0.3625    | 3.5162    | 0.8819    | C    | 0.4315    | 3.582     | 0.6955    |
| H    | 0.0945    | 4.5673    | 1.0834    | H    | 0.1885    | 4.6477    | 0.8461    |
| O    | -0.0068   | 2.6122    | 1.6229    | O    | -1.00E-04 | 2.7182    | 1.4506    |
| H    | 3.4751    | -3.7998   | -1.1882   | H    | 3.403     | -3.8965   | -0.9491   |
| H    | 2.0833    | -2.7886   | -1.5357   | H    | 2.0583    | -2.86     | -1.394    |
| H    | 2.2181    | -3.2871   | 0.8627    | H    | 2.0811    | -3.2629   | 1.026     |
| H    | 3.8628    | -2.6708   | 0.9607    | H    | 3.7389    | -2.6918   | 1.1673    |
| H    | 4.0465    | -1.9738   | -2.7615   | H    | 4.093     | -2.1544   | -2.5694   |
| H    | 4.9967    | -1.9436   | -1.2887   | H    | 4.9843    | -2.0918   | -1.0612   |
| H    | 2.5057    | 1.574     | 1.3372    | H    | 2.5009    | 1.6028    | 1.3178    |
| H    | 3.5984    | 2.129     | 0.1251    | H    | 3.658     | 2.0749    | 0.1306    |
| H    | 0.7213    | 1.2207    | -0.365    | H    | 0.7765    | 1.231     | -0.4418   |
| H    | 0.981     | 1.6941    | -2.6973   | H    | 2.8134    | 2.0741    | -2.529    |
| H    | 2.6446    | 2.2067    | -2.4971   | H    | 1.1441    | 1.603     | -2.7779   |

|             |                  |                  |                  |             |                  |                  |                  |
|-------------|------------------|------------------|------------------|-------------|------------------|------------------|------------------|
| H           | 2.5973           | -0.0476          | -3.3769          | H           | 2.7317           | -0.2119          | -3.3207          |
| H           | 1.5187           | -0.5937          | -2.121           | H           | 1.5866           | -0.6746          | -2.0904          |
| H           | 5.7296           | 0.2595           | -1.4452          | H           | 5.7915           | 0.0803           | -1.274           |
| H           | 4.9566           | 0.4061           | -3.0212          | H           | 5.0877           | 0.1848           | -2.8854          |
| H           | 4.6723           | 1.6257           | -1.7793          | H           | 4.7917           | 1.4624           | -1.706           |
| H           | -7.1195          | -0.7438          | -1.1048          | H           | -5.9313          | -1.3668          | 0.8373           |
| H           | -5.7765          | -0.3826          | -2.1772          | H           | -7.1365          | -1.0861          | -0.4153          |
| H           | -6.2679          | 0.6058           | 0.6566           | H           | -6.3032          | 1.0031           | 0.6521           |
| H           | -6.0479          | 1.5391           | -0.8244          | H           | -6.0939          | 1.0013           | -1.1009          |
| H           | -5.6443          | -1.9824          | 0.4203           | H           | -5.4826          | -2.7349          | -1.2028          |
| H           | -5.593           | -2.6738          | -1.1918          | H           | -5.4492          | -1.2746          | -2.1717          |
| H           | -1.3159          | -0.1447          | -0.8172          | H           | -1.2689          | -0.0717          | -0.9336          |
| H           | -1.5634          | 0.8592           | 0.5772           | H           | -1.5822          | 0.9815           | 0.4058           |
| H           | -1.8395          | -1.1015          | 2.0464           | H           | -1.9501          | -0.889           | 1.9459           |
| H           | -1.1053          | -2.7787          | -0.4123          | H           | -1.1292          | -2.7777          | -0.3157          |
| H           | -1.3452          | -3.3716          | 1.2226           | H           | -1.5579          | -3.2103          | 1.3271           |
| H           | -3.3611          | -3.7095          | -0.1767          | H           | -3.4196          | -3.5942          | -0.2759          |
| H           | -3.6619          | -2.7192          | 1.2419           | H           | -3.8465          | -2.5143          | 1.0416           |
| H           | -2.1764          | -1.77            | -2.1687          | H           | -1.888           | -1.7666          | -2.1713          |
| H           | -3.605           | -2.7416          | -2.5036          | H           | -3.2836          | -2.7023          | -2.6873          |
| H           | -3.6437          | -0.9897          | -2.743           | H           | -3.2343          | -0.9545          | -2.9649          |
| H           | -2.8369          | 2.2907           | 0.9122           | H           | -2.8931          | 2.4003           | 0.6938           |
| H           | 4.4167           | -0.0256          | 1.7202           | H           | 4.3439           | -0.0364          | 1.8428           |
| H           | 1.1267           | 5.3501           | -0.8237          | H           | 1.3309           | 5.3261           | -1.0394          |
| H           | 2.0521           | 4.285            | -1.999           | H           | 2.2751           | 4.1891           | -2.1295          |
| H           | 0.3185           | -0.9033          | 3.5075           | H           | 0.15             | -0.7108          | 3.4898           |
| <b>2d-3</b> | <b>X axis(Å)</b> | <b>Y axis(Å)</b> | <b>Z axis(Å)</b> | <b>2d-4</b> | <b>X axis(Å)</b> | <b>Y axis(Å)</b> | <b>Z axis(Å)</b> |
| C           | -2.1656          | -3.1488          | -0.8354          | C           | 3.0021           | -2.7369          | -1.1679          |
| C           | -2.0588          | -2.0759          | -1.9117          | C           | 2.8142           | -2.6124          | 0.3392           |
| C           | -2.0232          | -0.6769          | -1.2867          | C           | 2.3259           | -1.2062          | 0.7121           |
| C           | -3.2838          | -0.3976          | -0.3924          | C           | 3.3237           | -0.0986          | 0.2237           |
| C           | -3.5186          | -1.5317          | 0.6769           | C           | 3.6392           | -0.224           | -1.3144          |
| C           | -3.4045          | -2.9409          | 0.0271           | C           | 3.9833           | -1.6944          | -1.6908          |
| C           | -3.2537          | 0.9933           | 0.295            | C           | 2.8764           | 1.348            | 0.5588           |
| C           | -2.2971          | 1.1112           | 1.4974           | C           | 1.73             | 1.9021           | -0.3102          |
| C           | -2.5383          | -0.0206          | 2.5096           | C           | 2.0097           | 1.7062           | -1.8084          |
| C           | -2.5105          | -1.4013          | 1.8478           | C           | 2.4418           | 0.2799           | -2.1586          |
| C           | -4.9574          | -1.4657          | 1.27             | C           | 4.8931           | 0.6086           | -1.7134          |
| O           | -0.7689          | -0.5432          | -0.5806          | O           | 0.9817           | -1.0605          | 0.1982           |
| C           | -2.3579          | 2.513            | 2.0817           | C           | 1.38             | 3.3575           | -0.0316          |
| C           | 6.4111           | -0.0867          | 0.6285           | C           | -6.0407          | -1.0199          | -0.1777          |
| C           | 5.5269           | -1.0384          | 1.4236           | C           | -5.742           | 0.4583           | 0.0439           |
| C           | 4.1476           | -1.2333          | 0.8359           | C           | -4.268           | 0.7328           | 0.2092           |
| C           | 3.617            | -0.4306          | -0.1201          | C           | -3.3052          | -0.1349          | -0.1849          |
| C           | 4.3889           | 0.7939           | -0.6557          | C           | -3.6399          | -1.4161          | -0.9752          |
| C           | 5.6208           | 1.1461           | 0.2237           | C           | -5.156           | -1.5631          | -1.2868          |
| C           | 2.2496           | -0.6222          | -0.7661          | C           | -1.8293          | -0.0116          | 0.1648           |



|   |         |         |         |   |         |         |         |
|---|---------|---------|---------|---|---------|---------|---------|
| C | 1.3759  | 0.6452  | -0.6933 | C | -1.3573 | -1.2336 | 0.9794  |
| C | 2.1162  | 1.8325  | -1.3268 | C | -1.694  | -2.5575 | 0.2742  |
| C | 3.4739  | 2.048   | -0.6602 | C | -3.1696 | -2.6301 | -0.1334 |
| C | 4.8802  | 0.4959  | -2.0922 | C | -2.9225 | -1.4162 | -2.348  |
| C | 3.4355  | -2.4178 | 1.4131  | C | -3.9665 | 2.0363  | 0.8781  |
| O | 3.9066  | -3.0939 | 2.3221  | O | -4.8326 | 2.7264  | 1.4063  |
| C | 0.0102  | 0.3782  | -1.2853 | C | 0.1169  | -1.1619 | 1.2866  |
| C | -1.8723 | 0.357   | -2.3796 | C | 2.0846  | -1.1332 | 2.204   |
| O | -4.4524 | -0.4088 | -1.2494 | O | 4.5837  | -0.3012 | 0.912   |
| C | -3.0104 | 2.9002  | 3.1897  | C | 2.1927  | 4.304   | 0.4667  |
| O | -2.7333 | 0.6831  | -3.1854 | O | 2.9432  | -1.0349 | 3.0697  |
| C | -0.5487 | 0.9552  | -2.3477 | C | 0.6617  | -1.1847 | 2.5009  |
| C | -1.5815 | 3.5706  | 1.3662  | C | -0.0222 | 3.7871  | -0.3143 |
| H | -1.6317 | 4.5834  | 1.8007  | H | -0.2472 | 4.8522  | -0.1344 |
| O | -0.923  | 3.3434  | 0.3577  | O | -0.8862 | 3.0156  | -0.7136 |
| H | -2.2182 | -4.1348 | -1.3119 | H | 3.3796  | -3.7388 | -1.4038 |
| H | -1.2642 | -3.1544 | -0.2123 | H | 2.0382  | -2.6416 | -1.6805 |
| H | -1.1464 | -2.2609 | -2.4932 | H | 2.0888  | -3.3717 | 0.6586  |
| H | -2.8997 | -2.1656 | -2.6108 | H | 3.7553  | -2.8441 | 0.8534  |
| H | -3.4292 | -3.715  | 0.805   | H | 4.0585  | -1.7938 | -2.7814 |
| H | -4.2834 | -3.1224 | -0.6067 | H | 4.9768  | -1.9479 | -1.296  |
| H | -3.0238 | 1.7647  | -0.4507 | H | 2.6001  | 1.4197  | 1.6188  |
| H | -4.2717 | 1.2498  | 0.6213  | H | 3.7577  | 1.9961  | 0.473   |
| H | -1.2674 | 0.9769  | 1.1561  | H | 0.8411  | 1.3194  | -0.0567 |
| H | -1.767  | 0.013   | 3.2898  | H | 1.111   | 1.9461  | -2.3909 |
| H | -3.4967 | 0.1089  | 3.0238  | H | 2.7775  | 2.4146  | -2.1435 |
| H | -2.7283 | -2.1577 | 2.6133  | H | 2.6995  | 0.2487  | -3.2255 |
| H | -1.4896 | -1.6113 | 1.5139  | H | 1.578   | -0.3834 | -2.0526 |
| H | -5.7196 | -1.6678 | 0.509   | H | 5.7979  | 0.2436  | -1.2146 |
| H | -5.0871 | -2.2166 | 2.0585  | H | 5.0746  | 0.5424  | -2.7929 |
| H | -5.1916 | -0.4912 | 1.7064  | H | 4.795   | 1.6689  | -1.4667 |
| H | 7.2747  | 0.2055  | 1.2371  | H | -5.8799 | -1.5828 | 0.7496  |
| H | 6.8113  | -0.595  | -0.2561 | H | -7.096  | -1.145  | -0.4461 |
| H | 5.4147  | -0.6566 | 2.4466  | H | -6.2993 | 0.7762  | 0.933   |
| H | 6.0523  | -1.9987 | 1.4952  | H | -6.1185 | 1.047   | -0.8018 |
| H | 5.2986  | 1.66    | 1.1399  | H | -5.4079 | -2.6139 | -1.4773 |
| H | 6.2792  | 1.8484  | -0.303  | H | -5.406  | -1.0216 | -2.21   |
| H | 2.3961  | -0.9143 | -1.8143 | H | -1.2466 | 0.102   | -0.7565 |
| H | 1.6935  | -1.4471 | -0.3179 | H | -1.6121 | 0.876   | 0.7626  |
| H | 1.2162  | 0.8881  | 0.3676  | H | -1.9078 | -1.2241 | 1.9321  |
| H | 2.2535  | 1.6767  | -2.4035 | H | -1.4698 | -3.3996 | 0.9418  |
| H | 1.5221  | 2.7483  | -1.2165 | H | -1.0598 | -2.6973 | -0.6097 |
| H | 3.985   | 2.8836  | -1.1556 | H | -3.3335 | -3.562  | -0.6895 |
| H | 3.2889  | 2.3723  | 0.3734  | H | -3.7744 | -2.7069 | 0.7798  |
| H | 4.0556  | 0.3317  | -2.7928 | H | -1.8319 | -1.4054 | -2.268  |
| H | 5.4718  | 1.3307  | -2.4853 | H | -3.1906 | -2.3086 | -2.9261 |
| H | 5.5086  | -0.4008 | -2.1271 | H | -3.2086 | -0.5384 | -2.9398 |

|             |                  |                  |                  |             |                  |                  |                  |
|-------------|------------------|------------------|------------------|-------------|------------------|------------------|------------------|
| H           | 2.4545           | -2.67            | 0.9929           | H           | -2.9211          | 2.3698           | 0.8688           |
| H           | -4.2991          | 0.2055           | -1.9981          | H           | 4.4116           | -0.3283          | 1.877            |
| H           | -2.994           | 3.9254           | 3.5491           | H           | 1.8617           | 5.3233           | 0.647            |
| H           | -3.5984          | 2.2059           | 3.781            | H           | 3.2316           | 4.1035           | 0.7077           |
| H           | -0.1861          | 1.7095           | -3.0189          | H           | 0.2149           | -1.2439          | 3.4745           |
| <b>2d-5</b> | <b>X axis(Å)</b> | <b>Y axis(Å)</b> | <b>Z axis(Å)</b> | <b>2d-6</b> | <b>X axis(Å)</b> | <b>Y axis(Å)</b> | <b>Z axis(Å)</b> |
| C           | 2.8786           | -2.7534          | -1.8109          | C           | -2.2896          | -3.1761          | -0.5458          |
| C           | 2.354            | -2.8881          | -0.386           | C           | -2.1594          | -2.212           | -1.7181          |
| C           | 2.1108           | -1.5062          | 0.2329           | C           | -2.0441          | -0.7653          | -1.2255          |
| C           | 3.4225           | -0.6416          | 0.2486           | C           | -3.2684          | -0.3453          | -0.3358          |
| C           | 4.0805           | -0.5384          | -1.1782          | C           | -3.5293          | -1.3647          | 0.838            |
| C           | 4.1662           | -1.9388          | -1.8523          | C           | -3.4962          | -2.831           | 0.3185           |
| C           | 3.2289           | 0.7708           | 0.8565           | C           | -3.1575          | 1.0994           | 0.2199           |
| C           | 2.487            | 1.7721           | -0.0457          | C           | -2.1672          | 1.28             | 1.3869           |
| C           | 3.1218           | 1.8318           | -1.446           | C           | -2.4357          | 0.258            | 2.5037           |
| C           | 3.2847           | 0.4442           | -2.0754          | C           | -2.488           | -1.1769          | 1.9715           |
| C           | 5.5509           | -0.0314          | -1.0943          | C           | -4.9486          | -1.1756          | 1.4511           |
| O           | 1.0027           | -0.9058          | -0.479           | O           | -0.7684          | -0.6286          | -0.5596          |
| C           | 2.3541           | 3.1149           | 0.655            | C           | -2.1484          | 2.7304           | 1.8406           |
| C           | -6.3965          | 1.1243           | -0.8508          | C           | 5.8042           | 0.6501           | 1.1994           |
| C           | -6.3715          | -0.3713          | -0.5649          | C           | 5.327            | -0.7118          | 1.6884           |
| C           | -5.0792          | -0.858           | 0.0508           | C           | 4.0427           | -1.15            | 1.0263           |
| C           | -3.9329          | -0.1329          | 0.0663           | C           | 3.6015           | -0.6298          | -0.1451          |
| C           | -3.8616          | 1.2628           | -0.5876          | C           | 4.4412           | 0.3834           | -0.9515          |
| C           | -5.0895          | 1.5549           | -1.4942          | C           | 5.8319           | 0.6694           | -0.3187          |
| C           | -2.6239          | -0.5723          | 0.713            | C           | 2.2259           | -0.8762          | -0.7488          |
| C           | -1.4125          | -0.4758          | -0.2395          | C           | 1.4245           | 0.4423           | -0.821           |
| C           | -1.3062          | 0.9423           | -0.8174          | C           | 2.2129           | 1.5243           | -1.5834          |
| C           | -2.6078          | 1.3662           | -1.4937          | C           | 3.6313           | 1.704            | -1.0281          |
| C           | -3.8013          | 2.3413           | 0.5202           | C           | 4.7289           | -0.1449          | -2.3786          |
| C           | -5.208           | -2.2185          | 0.6628           | C           | 3.2846           | -2.1716          | 1.8148           |
| O           | -6.2249          | -2.8967          | 0.5593           | O           | 3.6668           | -2.5866          | 2.904            |
| C           | -0.0998          | -0.9128          | 0.3812           | C           | 0.0352           | 0.187            | -1.3607          |
| C           | 1.5315           | -1.6617          | 1.6196           | C           | -1.8718          | 0.1562           | -2.4117          |
| O           | 4.3917           | -1.3159          | 1.0901           | O           | -4.4567          | -0.3781          | -1.1647          |
| C           | 3.0506           | 4.2344           | 0.3999           | C           | -2.7524          | 3.2478           | 2.9227           |
| O           | 2.1387           | -2.0284          | 2.6165           | O           | -2.7356          | 0.4483           | -3.2274          |
| C           | 0.1201           | -1.3137          | 1.6328           | C           | -0.5217          | 0.6909           | -2.4606          |
| C           | 1.3134           | 3.2147           | 1.7235           | C           | -1.3439          | 3.6801           | 1.0135           |
| H           | 1.2297           | 4.1935           | 2.2257           | H           | -1.3353          | 4.7292           | 1.3544           |
| O           | 0.5873           | 2.2774           | 2.0344           | O           | -0.7246          | 3.3309           | 0.0149           |
| H           | 3.0693           | -3.7518          | -2.2218          | H           | -2.3993          | -4.1977          | -0.9283          |
| H           | 2.1196           | -2.2944          | -2.4543          | H           | -1.3746          | -3.1685          | 0.0571           |
| H           | 1.4223           | -3.4677          | -0.4153          | H           | -1.2709          | -2.493           | -2.2982          |
| H           | 3.0625           | -3.466           | 0.2204           | H           | -3.0203          | -2.3243          | -2.3892          |
| H           | 4.4852           | -1.8321          | -2.8971          | H           | -3.5377          | -3.5289          | 1.1647           |
| H           | 4.9473           | -2.5328          | -1.3582          | H           | -4.3977          | -3.0268          | -0.2782          |

|             |                  |                  |                  |   |         |         |         |
|-------------|------------------|------------------|------------------|---|---------|---------|---------|
| H           | 2.7249           | 0.6836           | 1.827            | H | -2.9107 | 1.7877  | -0.5982 |
| H           | 4.2129           | 1.1848           | 1.1187           | H | -4.1542 | 1.4332  | 0.5418  |
| H           | 1.4664           | 1.418            | -0.2026          | H | -1.1535 | 1.0656  | 1.0387  |
| H           | 2.4979           | 2.4477           | -2.1063          | H | -1.6449 | 0.3252  | 3.2618  |
| H           | 4.1015           | 2.3205           | -1.4102          | H | -3.3742 | 0.4799  | 3.0228  |
| H           | 3.7915           | 0.5593           | -3.0425          | H | -2.7218 | -1.8491 | 2.8075  |
| H           | 2.2937           | 0.0462           | -2.3139          | H | -1.4863 | -1.4656 | 1.638   |
| H           | 6.1936           | -0.738           | -0.5573          | H | -5.7376 | -1.409  | 0.7273  |
| H           | 5.9772           | 0.0891           | -2.0974          | H | -5.0936 | -1.8445 | 2.3077  |
| H           | 5.6396           | 0.9321           | -0.5858          | H | -5.1268 | -0.1553 | 1.8006  |
| H           | -7.2358          | 1.356            | -1.5167          | H | 5.1481  | 1.4417  | 1.5805  |
| H           | -6.5712          | 1.6821           | 0.0763           | H | 6.8067  | 0.8515  | 1.594   |
| H           | -6.5358          | -0.9209          | -1.5008          | H | 5.2009  | -0.6421 | 2.7754  |
| H           | -7.2193          | -0.5978          | 0.0934           | H | 6.0979  | -1.4693 | 1.5001  |
| H           | -4.9898          | 1.0237           | -2.4509          | H | 6.22    | 1.6347  | -0.6674 |
| H           | -5.1365          | 2.6226           | -1.7432          | H | 6.5592  | -0.0851 | -0.65   |
| H           | -2.4553          | 0.0518           | 1.6002           | H | 2.3308  | -1.3213 | -1.7454 |
| H           | -2.6738          | -1.5985          | 1.0813           | H | 1.6457  | -1.6042 | -0.179  |
| H           | -1.6011          | -1.165           | -1.076           | H | 1.2949  | 0.8109  | 0.2077  |
| H           | -1.0435          | 1.6587           | -0.0316          | H | 2.2699  | 1.2792  | -2.6506 |
| H           | -0.5023          | 0.9897           | -1.5627          | H | 1.6865  | 2.4848  | -1.5159 |
| H           | -2.4969          | 2.3933           | -1.865           | H | 4.161   | 2.4358  | -1.6515 |
| H           | -2.7422          | 0.7331           | -2.3819          | H | 3.5527  | 2.1519  | -0.0287 |
| H           | -2.9057          | 2.2547           | 1.1433           | H | 3.8265  | -0.293  | -2.9778 |
| H           | -3.7925          | 3.3482           | 0.087            | H | 5.3646  | 0.5571  | -2.9314 |
| H           | -4.6629          | 2.278            | 1.1937           | H | 5.2514  | -1.1083 | -2.3417 |
| H           | -4.3456          | -2.6026          | 1.2208           | H | 2.3607  | -2.5628 | 1.3713  |
| H           | 3.9794           | -1.4858          | 1.9637           | H | -4.2934 | 0.1578  | -1.9694 |
| H           | 2.8858           | 5.1614           | 0.9423           | H | -2.6794 | 4.2994  | 3.1857  |
| H           | 3.8246           | 4.2687           | -0.3598          | H | -3.3551 | 2.6391  | 3.5888  |
| H           | -0.5319          | -1.3986          | 2.4803           | H | -0.1418 | 1.3639  | -3.2047 |
| <b>2d-7</b> | <b>X axis(Å)</b> | <b>Y axis(Å)</b> | <b>Z axis(Å)</b> |   |         |         |         |
| C           | 2.9877           | -2.7323          | -1.3035          |   |         |         |         |
| C           | 2.874            | -2.5867          | 0.2094           |   |         |         |         |
| C           | 2.3192           | -1.2059          | 0.5805           |   |         |         |         |
| C           | 3.223            | -0.0482          | 0.0174           |   |         |         |         |
| C           | 3.4683           | -0.1897          | -1.5322          |   |         |         |         |
| C           | 3.8761           | -1.6463          | -1.8988          |   |         |         |         |
| C           | 2.696            | 1.3719           | 0.3508           |   |         |         |         |
| C           | 1.465            | 1.8086           | -0.4622          |   |         |         |         |
| C           | 1.7139           | 1.6386           | -1.9709          |   |         |         |         |
| C           | 2.205            | 0.2312           | -2.3262          |   |         |         |         |
| C           | 4.654            | 0.7018           | -2.0069          |   |         |         |         |
| O           | 0.9425           | -1.1637          | 0.134            |   |         |         |         |
| C           | 0.9888           | 3.1884           | -0.0437          |   |         |         |         |
| C           | -6.11            | -0.3249          | -0.9627          |   |         |         |         |
| C           | -5.6636          | 0.8765           | -0.1373          |   |         |         |         |

|   |         |         |         |
|---|---------|---------|---------|
| C | -4.1786 | 0.92    | 0.099   |
| C | -3.348  | -0.1339 | -0.0748 |
| C | -3.8664 | -1.4945 | -0.5672 |
| C | -5.416  | -1.5911 | -0.478  |
| C | -1.8497 | -0.0771 | 0.1813  |
| C | -1.3511 | -1.2321 | 1.0685  |
| C | -1.7713 | -2.5861 | 0.4844  |
| C | -3.2873 | -2.6465 | 0.2963  |
| C | -3.4423 | -1.6848 | -2.0427 |
| C | -3.6943 | 2.2712  | 0.5122  |
| O | -2.742  | 2.8426  | -0.0042 |
| C | 0.1424  | -1.1842 | 1.2761  |
| C | 2.1603  | -1.1093 | 2.0822  |
| O | 4.5271  | -0.1566 | 0.642   |
| C | 1.1123  | 4.3323  | -0.7363 |
| O | 3.0687  | -1.0175 | 2.8969  |
| C | 0.7564  | -1.1381 | 2.4565  |
| C | 0.2458  | 3.2784  | 1.2516  |
| H | -0.215  | 4.2554  | 1.4752  |
| O | 0.1603  | 2.3413  | 2.0387  |
| H | 3.4105  | -3.7156 | -1.5412 |
| H | 1.994   | -2.7041 | -1.7645 |
| H | 2.2143  | -3.3803 | 0.5832  |
| H | 3.854   | -2.7493 | 0.6751  |
| H | 3.8989  | -1.7651 | -2.9898 |
| H | 4.9023  | -1.8343 | -1.5539 |
| H | 2.4942  | 1.4391  | 1.4265  |
| H | 3.504   | 2.1012  | 0.1988  |
| H | 0.6367  | 1.1398  | -0.2297 |
| H | 0.7857  | 1.8363  | -2.5224 |
| H | 2.4446  | 2.372   | -2.3295 |
| H | 2.4136  | 0.198   | -3.4037 |
| H | 1.3862  | -0.4776 | -2.1682 |
| H | 5.6026  | 0.3887  | -1.5565 |
| H | 4.7791  | 0.6338  | -3.0942 |
| H | 4.5159  | 1.758   | -1.7617 |
| H | -7.197  | -0.441  | -0.8817 |
| H | -5.8936 | -0.1525 | -2.0233 |
| H | -6.1684 | 0.8552  | 0.837   |
| H | -5.9946 | 1.7893  | -0.6476 |
| H | -5.7234 | -1.7693 | 0.5617  |
| H | -5.7785 | -2.4515 | -1.0546 |
| H | -1.337  | -0.0877 | -0.7886 |
| H | -1.5649 | 0.8556  | 0.6722  |
| H | -1.8368 | -1.1284 | 2.0502  |
| H | -1.2656 | -2.7729 | -0.4707 |
| H | -1.4651 | -3.3961 | 1.1586  |

|   |         |         |         |
|---|---------|---------|---------|
| H | -3.5538 | -3.6162 | -0.1435 |
| H | -3.7482 | -2.6263 | 1.2936  |
| H | -2.3547 | -1.697  | -2.167  |
| H | -3.8227 | -2.6326 | -2.4408 |
| H | -3.8242 | -0.8808 | -2.6814 |
| H | -4.3013 | 2.7529  | 1.2974  |
| H | 4.4036  | -0.164  | 1.615   |
| H | 0.7156  | 5.2765  | -0.3743 |
| H | 1.6144  | 4.3704  | -1.6969 |
| H | 0.3631  | -1.1149 | 3.4541  |

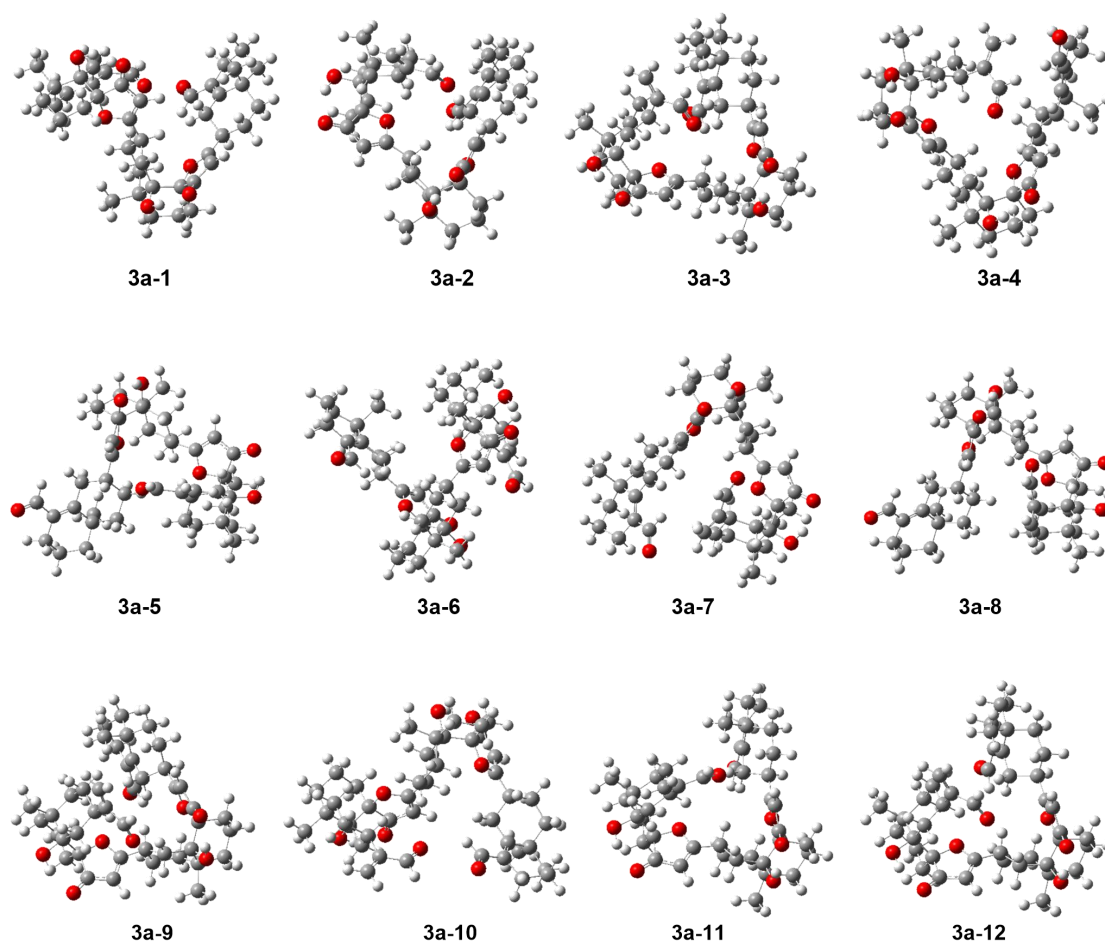

**Figure S16.** Optimized geometries of predominant conformers for **3a** at the B3LYP/6-31G (d,p) level

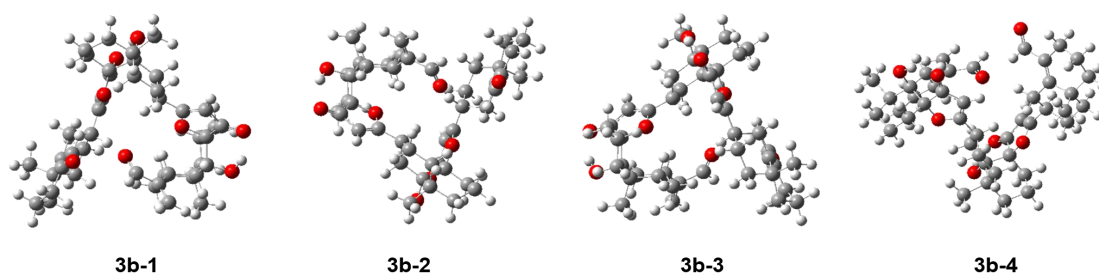

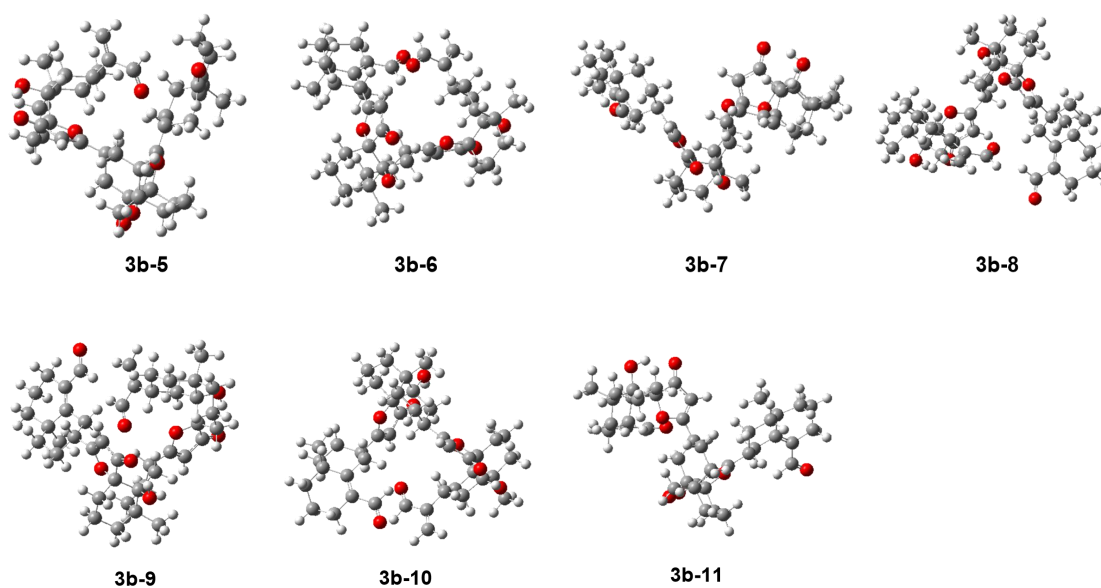

**Figure S17.** Optimized geometries of predominant conformers for **3b** at the B3LYP/6-31G (d,p) level

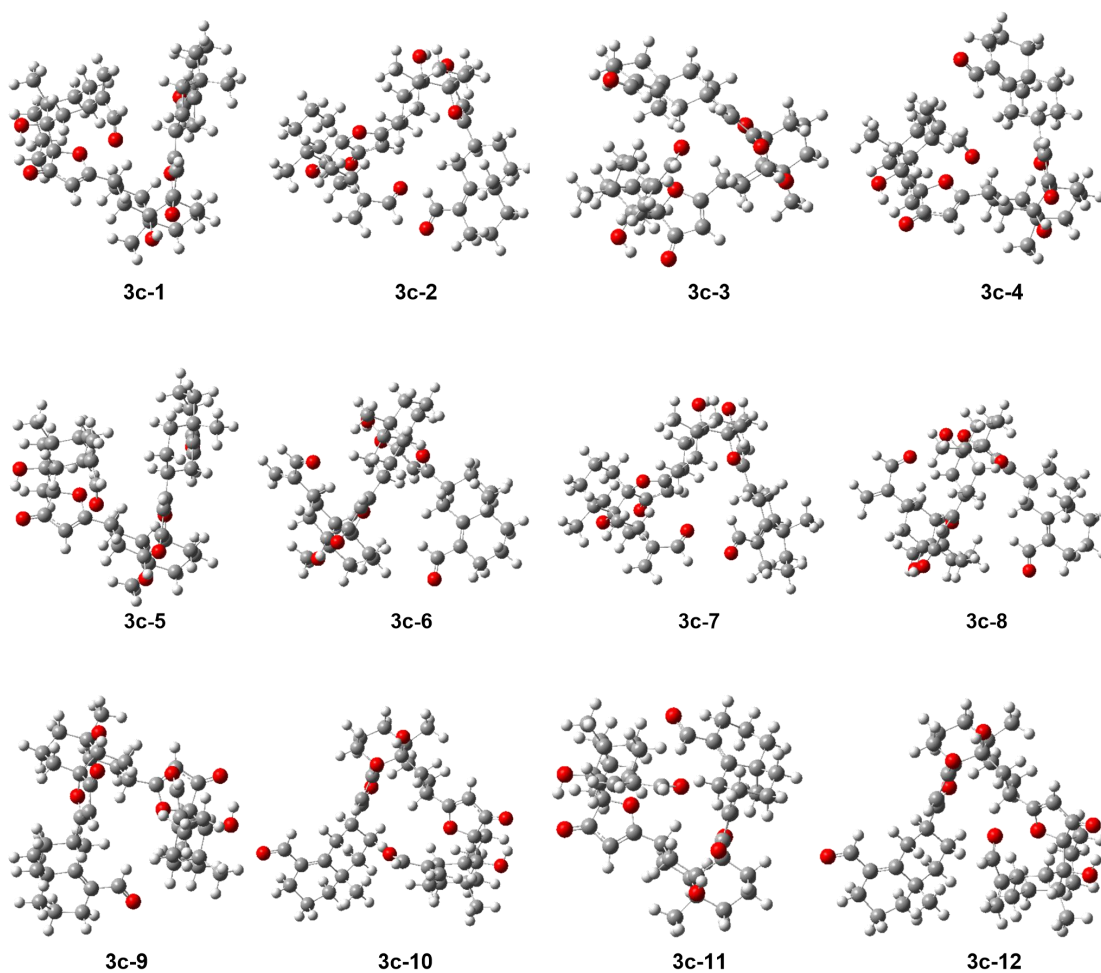

**Figure S18.** Optimized geometries of predominant conformers for **3c** at the S110

B3LYP/6-31G (d,p) level

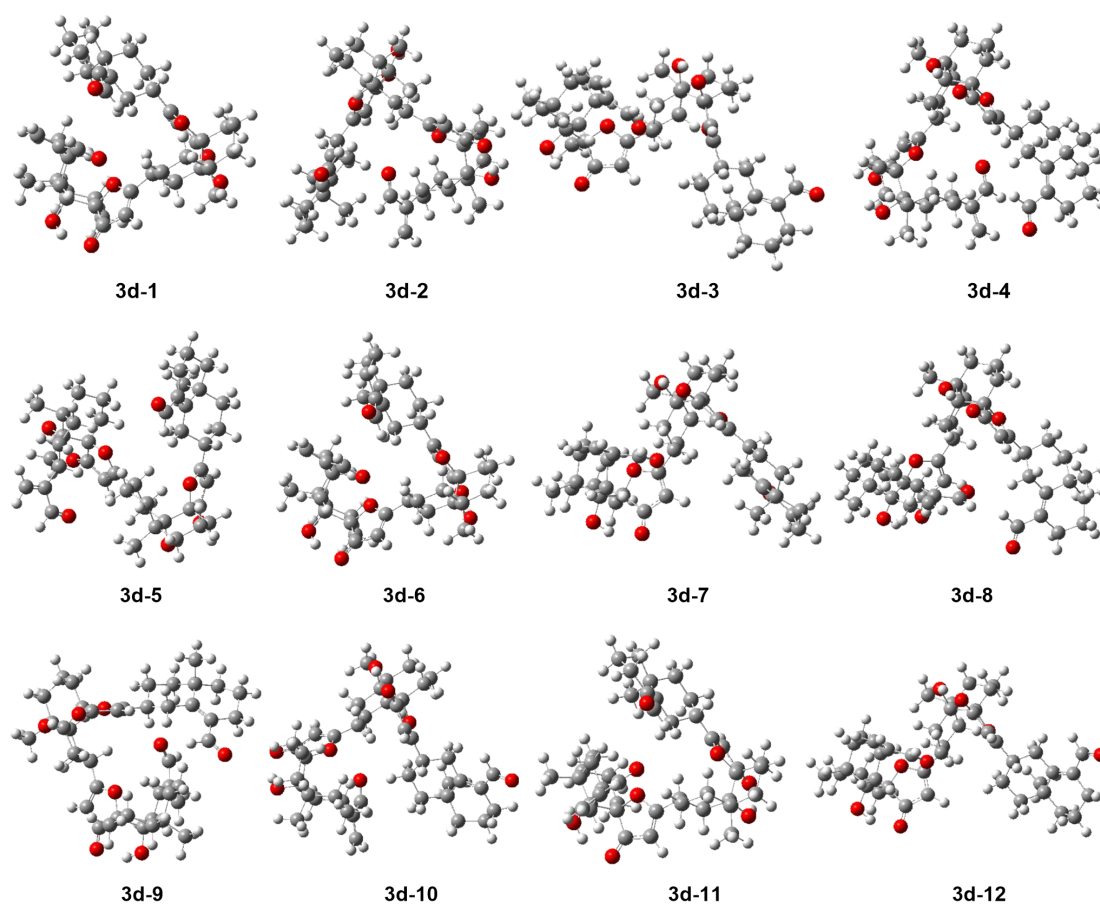

**Figure S19.** Optimized geometries of predominant conformers for **3d** at the B3LYP/6-31G (d,p) level

**Table S6.** Conformational analysis of the optimized **3a-3d** at the B3LYP/6-31G(d,p) level in the gas phase

|    | <i>Conformers</i> | G (Hartree)  | $\Delta G$ (Kcal/mol) | Population |
|----|-------------------|--------------|-----------------------|------------|
| 3a | 3a-1              | -2273.321998 | 1.23744972            | 4.53%      |
|    | 3a-2              | -2273.319115 | 3.04656105            | 0.21%      |
|    | 3a-3              | -2273.321414 | 1.60391556            | 2.44%      |
|    | 3a-4              | -2273.322442 | 0.95883528            | 7.25%      |
|    | 3a-5              | -2273.32397  | 0                     | 36.58%     |
|    | 3a-6              | -2273.321728 | 1.40687742            | 3.40%      |
|    | 3a-7              | -2273.322682 | 0.80823288            | 9.34%      |
|    | 3a-8              | -2273.323849 | 0.07592871            | 32.18%     |
|    | 3a-9              | -2273.320317 | 2.29229403            | 0.76%      |
|    | 3a-10             | -2273.321497 | 1.55183223            | 2.66%      |

|    |                   |              |                       |            |
|----|-------------------|--------------|-----------------------|------------|
|    | 3a-11             | -2273.319892 | 2.55898578            | 0.49%      |
|    | 3a-12             | -2273.318919 | 3.16955301            | 0.17%      |
|    | <i>Conformers</i> | G (Hartree)  | $\Delta G$ (Kcal/mol) | Population |
| 3b | 3b-1              | -2273.325528 | 0.00439257            | 22.08%     |
|    | 3b-2              | -2273.325535 | 0                     | 22.24%     |
|    | 3b-3              | -2273.325533 | 0.00125502            | 22.19%     |
|    | 3b-4              | -2273.324086 | 0.90926199            | 4.79%      |
|    | 3b-5              | -2273.323998 | 0.96448287            | 4.36%      |
|    | 3b-6              | -2273.320878 | 2.92231407            | 0.16%      |
|    | 3b-7              | -2273.325395 | 0.0878514             | 19.17%     |
|    | 3b-8              | -2273.323579 | 1.22740956            | 2.80%      |
|    | 3b-9              | -2273.319852 | 3.56613933            | 0.05%      |
|    | 3b-10             | -2273.318724 | 4.27397061            | 0.02%      |
|    | 3b-11             | -2273.323325 | 1.3867971             | 2.14%      |
|    | <i>Conformers</i> | G (Hartree)  | $\Delta G$ (Kcal/mol) | Population |
| 3c | 3c-1              | -2273.323715 | 0                     | 35.43%     |
|    | 3c-2              | -2273.322943 | 0.48443772            | 15.63%     |
|    | 3c-3              | -2273.320363 | 2.10341352            | 1.02%      |
|    | 3c-4              | -2273.319772 | 2.47427193            | 0.54%      |
|    | 3c-5              | -2273.322755 | 0.6024096             | 12.81%     |
|    | 3c-6              | -2273.322371 | 0.84337344            | 8.53%      |
|    | 3c-7              | -2273.322552 | 0.72979413            | 10.33%     |
|    | 3c-8              | -2273.320667 | 1.91265048            | 1.40%      |
|    | 3c-9              | -2273.321005 | 1.7005521             | 2.01%      |
|    | 3c-10             | -2273.32244  | 0.80007525            | 9.18%      |
|    | 3c-11             | -2273.31965  | 2.55082815            | 0.48%      |
|    | 3c-12             | -2273.321268 | 1.53551697            | 2.65%      |
|    | <i>Conformers</i> | G (Hartree)  | $\Delta G$ (Kcal/mol) | Population |
| 3d | 3d-1              | -2273.321013 | 2.79179199            | 0.41%      |
|    | 3d-2              | -2273.321006 | 2.79618456            | 0.41%      |
|    | 3d-3              | -2273.323818 | 1.03162644            | 8.08%      |
|    | 3d-4              | -2273.323431 | 1.27447281            | 5.36%      |
|    | 3d-5              | -2273.323067 | 1.50288645            | 3.65%      |



|       |              |            |        |
|-------|--------------|------------|--------|
| 3d-6  | -2273.319479 | 3.75439233 | 0.08%  |
| 3d-7  | -2273.323584 | 1.17846378 | 6.31%  |
| 3d-8  | -2273.325462 | 0          | 46.15% |
| 3d-9  | -2273.324662 | 0.502008   | 19.77% |
| 3d-10 | -2273.323377 | 1.30835835 | 5.07%  |
| 3d-11 | -2273.321147 | 2.70770565 | 0.48%  |
| 3d-12 | -2273.323208 | 1.41440754 | 4.24%  |

| Functional<br>mPW1PW91 |      | Solvent?<br>PCM |           | Basis Set<br>6-311+G(d, p) |           |           | Type of Data<br>Unscaled Shifts |  |
|------------------------|------|-----------------|-----------|----------------------------|-----------|-----------|---------------------------------|--|
| Nuclei                 | sp2? | DP4+            | 0.00%     | 0.00%                      | 100.00%   | 0.00%     | -                               |  |
|                        |      | xperimenta      | Isomer 1  | Isomer 2                   | Isomer 3  | Isomer 4  | Isomer 5                        |  |
| C                      |      | 18.5            | 22.00516  | 21.61972                   | 21.85539  | 21.35694  |                                 |  |
| C                      |      | 33.2            | 37.4723   | 37.585                     | 37.50901  | 37.15228  |                                 |  |
| C                      |      | 93.6            | 100.52166 | 100.58886                  | 100.49547 | 100.16015 |                                 |  |
| C                      |      | 74.4            | 80.56591  | 80.71014                   | 80.72082  | 80.73122  |                                 |  |
| C                      |      | 37.9            | 42.90397  | 43.01747                   | 42.99306  | 42.8591   |                                 |  |
| C                      |      | 36.3            | 38.28195  | 38.42252                   | 38.34745  | 38.39945  |                                 |  |
| C                      |      | 36.1            | 37.60372  | 39.47538                   | 38.49826  | 37.62716  |                                 |  |
| C                      |      | 38              | 42.48272  | 42.77595                   | 42.33652  | 42.65059  |                                 |  |
| C                      |      | 24.9            | 30.15873  | 27.13492                   | 27.8934   | 29.17111  |                                 |  |
| C                      |      | 32.4            | 34.97551  | 34.53289                   | 34.59852  | 35.01451  |                                 |  |
| C                      |      | 23.4            | 23.27989  | 23.35754                   | 23.32334  | 23.34326  |                                 |  |
| C                      | x    | 210.3           | 220.0469  | 220.01784                  | 220.00722 | 220.02076 |                                 |  |
| C                      | x    | 197.6           | 210.5433  | 209.49968                  | 209.55278 | 208.99988 |                                 |  |
| C                      | x    | 102.3           | 107.04463 | 107.91173                  | 107.76269 | 108.56628 |                                 |  |
| C                      |      | 18.5            | 21.89665  | 21.60234                   | 21.7993   | 22.06709  |                                 |  |
| C                      |      | 33.1            | 36.91326  | 36.1583                    | 36.90431  | 36.63697  |                                 |  |
| C                      |      | 93.3            | 99.95709  | 100.18042                  | 99.97775  | 99.96724  |                                 |  |
| C                      |      | 74.9            | 81.07304  | 81.30202                   | 81.04933  | 81.07785  |                                 |  |
| C                      |      | 37.9            | 43.14715  | 43.06538                   | 43.25677  | 43.08001  |                                 |  |
| C                      |      | 36.5            | 38.49565  | 38.2375                    | 38.59989  | 38.4872   |                                 |  |
| C                      |      | 39.3            | 41.31081  | 39.80418                   | 42.85913  | 41.95287  |                                 |  |
| C                      |      | 33.1            | 36.58307  | 35.67565                   | 36.42268  | 36.52298  |                                 |  |
| C                      |      | 25.7            | 28.22105  | 31.11239                   | 27.13623  | 27.56201  |                                 |  |
| C                      |      | 32.9            | 35.52049  | 35.7212                    | 35.42076  | 35.19318  |                                 |  |
| C                      | x    | 154.8           | 163.44246 | 163.39381                  | 163.7239  | 163.59607 |                                 |  |
| C                      | x    | 194.8           | 205.44158 | 205.3088                   | 205.66095 | 205.96902 |                                 |  |
| C                      | x    | 133.7           | 146.48014 | 146.27892                  | 146.3739  | 146.98392 |                                 |  |
| C                      |      | 23.6            | 23.72291  | 23.71101                   | 23.63809  | 23.47961  |                                 |  |
| C                      | x    | 210.6           | 219.76518 | 219.83176                  | 219.81448 | 219.52942 |                                 |  |
| C                      |      | 24.7            | 27.57358  | 27.67442                   | 27.44229  | 27.2944   |                                 |  |
| C                      | x    | 134.4           | 141.87903 | 141.85574                  | 142.02757 | 142.26977 |                                 |  |
| C                      | x    | 159.8           | 178.40818 | 176.93504                  | 178.40419 | 178.23444 |                                 |  |
| C                      |      | 36.8            | 43.15785  | 43.35943                   | 43.29841  | 43.21295  |                                 |  |
| C                      |      | 39.7            | 41.54968  | 41.65013                   | 41.5843   | 41.44618  |                                 |  |
| C                      |      | 27.7            | 31.23513  | 31.12004                   | 30.09693  | 29.60188  |                                 |  |
| C                      |      | 41.6            | 47.0894   | 46.02673                   | 46.71105  | 46.64381  |                                 |  |
| C                      |      | 25.4            | 27.44143  | 26.88702                   | 28.05394  | 29.77849  |                                 |  |
| C                      |      | 40.8            | 43.74743  | 44.03922                   | 43.82498  | 44.04707  |                                 |  |
| C                      | x    | 195.4           | 206.84814 | 207.84825                  | 206.51673 | 207.93039 |                                 |  |
| C                      | x    | 103.7           | 109.7072  | 108.67766                  | 109.27521 | 108.31101 |                                 |  |
| C                      |      | 25.1            | 26.60394  | 26.25846                   | 26.58522  | 26.4609   |                                 |  |
| C                      | x    | 190.9           | 198.86649 | 199.82868                  | 198.91614 | 200.20932 |                                 |  |
| C                      |      | 18.3            | 21.14086  | 21.30726                   | 21.26424  | 21.16564  |                                 |  |
| H                      |      | 1.92            | 1.98827   | 1.58018                    | 2.0071    | 1.53915   |                                 |  |
| H                      |      | 1.5             | 1.56413   | 2.03494                    | 1.56342   | 1.96668   |                                 |  |
| H                      |      | 2.35            | 2.21952   | 1.43634                    | 2.2329    | 1.41511   |                                 |  |
| H                      |      | 1.43            | 1.36112   | 2.18361                    | 1.39782   | 2.16659   |                                 |  |
| H                      |      | 1.31            | 2.03817   | 1.35078                    | 2.07621   | 1.32298   |                                 |  |
| H                      |      | 2.09            | 1.31158   | 2.03378                    | 1.32643   | 2.03706   |                                 |  |
| H                      |      | 2.23            | 1.8737    | 1.66356                    | 1.9773    | 1.56277   |                                 |  |
| H                      |      | 2.14            | 2.00691   | 1.80406                    | 1.60323   | 2.05469   |                                 |  |
| H                      |      | 3.11            | 2.89315   | 3.13874                    | 3.14615   | 3.16987   |                                 |  |
| H                      |      | 2.05            | 1.7274    | 1.50107                    | 2.07561   | 1.74438   |                                 |  |
| H                      |      | 1.93            | 2.0049    | 1.87628                    | 1.8838    | 1.91905   |                                 |  |

|   |   |       |         |          |          |          |  |
|---|---|-------|---------|----------|----------|----------|--|
| H |   | 2.57  | 2.64957 | 1.22682  | 2.53369  | 1.24002  |  |
| H |   | 1.29  | 1.28497 | 2.57928  | 1.21601  | 2.53624  |  |
| H |   | 1.27  | 1.56972 | 1.42815  | 1.62643  | 1.39783  |  |
| H |   | 1.27  | 0.41483 | 0.44166  | 0.42501  | 0.40865  |  |
| H |   | 1.27  | 1.46386 | 1.57781  | 1.42338  | 1.59587  |  |
| H |   | 5.77  | 5.55723 | 5.62367  | 5.53677  | 5.56618  |  |
| H | x | 5.81  | 5.64904 | 5.62395  | 5.62446  | 5.64433  |  |
| H |   | 1.85  | 1.90934 | 1.85468  | 1.9351   | 1.8842   |  |
| H |   | 1.5   | 1.51164 | 1.48116  | 1.53052  | 1.49193  |  |
| H |   | 2.3   | 2.15736 | 2.12188  | 2.12527  | 2.12026  |  |
| H |   | 1.32  | 1.31054 | 1.28127  | 1.2946   | 1.27379  |  |
| H |   | 2.03  | 1.96434 | 1.94981  | 1.97506  | 1.93721  |  |
| H |   | 1.27  | 1.26226 | 1.22979  | 1.26666  | 1.2737   |  |
| H |   | 1.65  | 1.46194 | 1.69227  | 1.32664  | 1.33751  |  |
| H |   | 1.63  | 1.24492 | 1.10954  | 1.25915  | 1.30306  |  |
| H |   | 2.9   | 2.6946  | 2.87372  | 2.88507  | 2.77878  |  |
| H |   | 1.52  | 1.63698 | 1.41111  | 1.43902  | 1.72293  |  |
| H |   | 1.63  | 1.42961 | 1.41983  | 1.72712  | 1.29571  |  |
| H |   | 1.15  | 1.12866 | 1.10551  | 1.19062  | 1.17619  |  |
| H |   | 2.38  | 2.34229 | 2.34838  | 2.39416  | 2.37775  |  |
| H | x | 9.44  | 9.64885 | 9.45425  | 9.4758   | 9.65677  |  |
| H | x | 5.85  | 6.50218 | 6.43751  | 6.42927  | 6.48445  |  |
| H | x | 6.18  | 6.83034 | 6.77967  | 6.81935  | 6.82224  |  |
| H |   | 1.17  | 1.52252 | 1.48265  | 1.54196  | 1.53763  |  |
| H |   | 1.17  | 0.3664  | 0.33701  | 0.3736   | 0.35553  |  |
| H |   | 1.17  | 1.38149 | 1.38384  | 1.33654  | 1.33012  |  |
| H |   | 2.51  | 2.04294 | 2.0127   | 2.52299  | 2.57831  |  |
| H |   | 2.17  | 2.59021 | 2.52312  | 2.07096  | 2.01855  |  |
| H |   | 1.29  | 1.40797 | 1.28521  | 1.4623   | 1.42979  |  |
| H |   | 1.5   | 1.64956 | 1.62175  | 1.65325  | 1.64141  |  |
| H |   | 3.8   | 2.57449 | 2.35408  | 4.06136  | 2.4884   |  |
| H |   | 2.44  | 3.71994 | 4.45273  | 2.78435  | 4.18248  |  |
| H |   | 2.93  | 3.11337 | 3.3933   | 2.96625  | 3.10982  |  |
| H |   | 1.13  | 2.06199 | 2.08613  | 1.91421  | 2.18376  |  |
| H |   | 2.03  | 2.35801 | 1.99235  | 2.19137  | 1.99907  |  |
| H |   | 1.5   | 1.7804  | 1.87974  | 1.67131  | 1.81481  |  |
| H |   | 1.73  | 1.73467 | 1.54953  | 1.89897  | 1.91833  |  |
| H | x | 5.98  | 5.59725 | 5.79804  | 5.7815   | 5.65936  |  |
| H |   | 1.18  | 1.56437 | 1.32511  | 0.80821  | 1.90107  |  |
| H |   | 1.18  | 1.08426 | 1.87058  | 1.95031  | 1.34854  |  |
| H |   | 1.18  | 1.53077 | 0.80472  | 1.29953  | 0.80325  |  |
| H | x | 10.41 | 10.5188 | 10.87848 | 10.53796 | 10.67221 |  |
| H |   | 5.66  | 5.5446  | 5.44611  | 5.53321  | 5.52304  |  |
| H |   | 1.5   | 1.64557 | 1.55985  | 1.63802  | 1.63786  |  |
| H |   | 1.5   | 1.69762 | 1.64052  | 1.6767   | 1.69681  |  |

| Functional       | Solvent? |          | Basis Set    |          | Type of Data    |          |
|------------------|----------|----------|--------------|----------|-----------------|----------|
| mPW1PW91         | PCM      |          | 6-311+G(d,p) |          | Unscaled Shifts |          |
|                  | Isomer 1 | Isomer 2 | Isomer 3     | Isomer 4 | Isomer 5        | Isomer 6 |
| sDP4+ (H data)   | 0.00%    | 0.00%    | 100.00%      | 0.00%    | –               | –        |
| sDP4+ (C data)   | 1.36%    | 4.26%    | 87.82%       | 6.56%    | –               | –        |
| sDP4+ (all data) | 0.00%    | 0.00%    | 100.00%      | 0.00%    | –               | –        |
| uDP4+ (H data)   | 0.00%    | 0.00%    | 100.00%      | 0.00%    | –               | –        |
| uDP4+ (C data)   | 18.50%   | 8.13%    | 61.03%       | 12.34%   | –               | –        |
| uDP4+ (all data) | 0.00%    | 0.00%    | 100.00%      | 0.00%    | –               | –        |
| DP4+ (H data)    | 0.00%    | 0.00%    | 100.00%      | 0.00%    | –               | –        |
| DP4+ (C data)    | 0.46%    | 0.63%    | 97.44%       | 1.47%    | –               | –        |
| DP4+ (all data)  | 0.00%    | 0.00%    | 100.00%      | 0.00%    | –               | –        |

**Figure S20.** DP4+ analysis of experimental NMR data of **3** and unscaled shifts of **3a-3d** (Isomer 1-4)

**Table S7.** The Cartesian coordinates of the lowest energy conformers for **3a-3d** in the gas phase at the B3LYP/6-31G(d,p) level

| <b>3a-1</b> | <b>X axis(Å)</b> | <b>Y axis(Å)</b> | <b>Z axis(Å)</b> | <b>3a-2</b> | <b>X axis(Å)</b> | <b>Y axis(Å)</b> | <b>Z axis(Å)</b> |
|-------------|------------------|------------------|------------------|-------------|------------------|------------------|------------------|
| C           | 2.9055           | 4.0582           | 2.425            | C           | 5.7147           | 0.7164           | -1.2828          |
| C           | 3.2373           | 4.2135           | 0.9455           | C           | 5.3437           | 0.8226           | 0.1907           |
| C           | 2.3428           | 3.3094           | 0.0875           | C           | 3.9654           | 0.2001           | 0.4593           |
| C           | 0.8199           | 3.6206           | 0.3128           | C           | 3.9117           | -1.3033          | 0.0165           |
| C           | 0.4283           | 3.5522           | 1.8364           | C           | 4.3642           | -1.488           | -1.4814          |
| C           | 1.4373           | 4.3622           | 2.701            | C           | 5.6967           | -0.7326          | -1.7536          |
| C           | -0.1326          | 2.7297           | -0.5227          | C           | 2.5375           | -1.9837          | 0.2459           |
| C           | -0.2629          | 1.282            | -0.0288          | C           | 1.4357           | -1.5943          | -0.7539          |
| C           | -0.56            | 1.2044           | 1.4757           | C           | 1.9073           | -1.6545          | -2.2143          |
| C           | 0.3687           | 2.0806           | 2.3194           | C           | 3.2622           | -0.9879          | -2.4484          |
| C           | -0.9614          | 4.2023           | 2.0999           | C           | 4.6582           | -2.9805          | -1.8115          |
| C           | 2.7388           | 3.4359           | -1.3655          | C           | 3.6201           | 0.3792           | 1.9196           |
| O           | 2.4769           | 4.3724           | -2.1071          | O           | 4.0625           | -0.2809          | 2.8499           |
| O           | 0.5776           | 4.9848           | -0.1095          | O           | 4.8653           | -2.0413          | 0.8208           |
| C           | -1.2794          | 0.5425           | -0.8651          | C           | 0.1769           | -2.4222          | -0.6124          |
| O           | -2.6219          | 0.6967           | -0.5251          | O           | -1.0276          | -1.7218          | -0.7146          |
| C           | -0.9948          | -0.2553          | -1.8924          | C           | 0.0986           | -3.7378          | -0.4177          |
| C           | -5.1826          | 1.7526           | -1.5309          | C           | -3.2643          | -1.4826          | -2.646           |
| C           | -4.1256          | 1.0358           | -2.3634          | C           | -2.5513          | -2.7711          | -2.2562          |
| C           | -3.3967          | -0.0153          | -1.519           | C           | -2.0832          | -2.7107          | -0.7966          |
| C           | -4.3928          | -1.0775          | -0.9279          | C           | -3.2811          | -2.4662          | 0.1866           |
| C           | -5.5762          | -0.4047          | -0.1359          | C           | -4.1361          | -1.2059          | -0.2155          |
| C           | -6.1929          | 0.7688           | -0.9518          | C           | -4.4579          | -1.2141          | -1.738           |
| C           | -3.7024          | -2.1553          | -0.0532          | C           | -2.8568          | -2.376           | 1.6757           |
| C           | -3.2616          | -1.6756          | 1.3406           | C           | -2.1706          | -1.0584          | 2.0896           |
| C           | -4.4256          | -1.0009          | 2.0857           | C           | -3.0078          | 0.1524           | 1.6498           |
| C           | -5.092           | 0.0971           | 1.2492           | C           | -3.3947          | 0.0978           | 0.17             |
| C           | -2.5787          | -2.8033          | 2.0961           | C           | -1.8407          | -0.9658          | 3.5735           |
| C           | -1.1679          | -3.1128          | 1.7088           | C           | -0.7742          | -6.00E-04        | 3.9752           |
| C           | -3.0926          | -3.5336          | 3.0989           | C           | -2.3805          | -1.6844          | 4.5721           |
| O           | -0.5689          | -2.492           | 0.8359           | O           | -0.1819          | 0.7105           | 3.1723           |
| C           | -6.7477          | -1.4043          | 0.098            | C           | -5.5208          | -1.2002          | 0.4977           |
| C           | -2.3113          | -0.6747          | -2.3413          | C           | -1.3337          | -3.9779          | -0.4518          |
| O           | -2.4821          | -1.4662          | -3.2586          | O           | -1.8312          | -5.0708          | -0.2181          |
| C           | 3.7825           | -4.5867          | 1.1007           | C           | -2.5219          | 4.2553           | -2.3447          |
| C           | 3.2381           | -3.1859          | 0.9386           | C           | -1.5306          | 3.2251           | -1.8542          |
| C           | 3.5514           | -2.3722          | -0.101           | C           | -0.8873          | 3.3051           | -0.6626          |
| C           | 4.5373           | -2.8197          | -1.1981          | C           | -1.1169          | 4.4955           | 0.2916           |
| C           | 5.3367           | -4.0871          | -0.7882          | C           | -1.8326          | 5.6802           | -0.4141          |
| C           | 2.9747           | -0.9802          | -0.325           | C           | 0.0908           | 2.2643           | -0.1311          |

|   |         |         |         |   |         |         |         |
|---|---------|---------|---------|---|---------|---------|---------|
| C | 4.0538  | 0.0952  | -0.5641 | C | 1.42    | 2.8681  | 0.3571  |
| C | 4.9715  | -0.3243 | -1.7224 | C | 1.1609  | 3.97    | 1.3933  |
| C | 5.58    | -1.7032 | -1.4706 | C | 0.236   | 5.0425  | 0.8198  |
| C | 3.4255  | 1.4629  | -0.7417 | C | 2.3561  | 1.7809  | 0.8355  |
| C | 3.4831  | 2.2646  | -1.8038 | C | 2.6711  | 1.466   | 2.091   |
| O | 2.7138  | 1.937   | 0.3628  | O | 2.969   | 1.0357  | -0.175  |
| C | 3.7489  | -3.1312 | -2.4925 | C | -1.9903 | 4.0311  | 1.4805  |
| C | 2.294   | -2.801  | 2.037   | C | -1.353  | 2.0899  | -2.8151 |
| O | 2.0179  | -3.552  | 2.9688  | O | -1.8871 | 2.0683  | -3.9195 |
| O | -5.0025 | -1.7837 | -2.0378 | O | -4.1769 | -3.6027 | 0.0901  |
| C | 4.4518  | -5.1442 | -0.149  | C | -3.002  | 5.2201  | -1.2684 |
| H | 3.1533  | 3.0464  | 2.7651  | H | 5.0335  | 1.3225  | -1.8904 |
| H | 3.5321  | 4.742   | 3.0097  | H | 6.7172  | 1.1335  | -1.4345 |
| H | 3.1255  | 5.2633  | 0.6468  | H | 6.1123  | 0.3344  | 0.8031  |
| H | 4.2954  | 3.9592  | 0.802   | H | 5.3508  | 1.884   | 0.4701  |
| H | 1.2832  | 5.4364  | 2.5294  | H | 6.5219  | -1.2562 | -1.2515 |
| H | 1.2352  | 4.1953  | 3.7669  | H | 5.9307  | -0.7598 | -2.8257 |
| H | 0.1815  | 2.7352  | -1.5749 | H | 2.1865  | -1.7872 | 1.2677  |
| H | -1.1267 | 3.1981  | -0.5506 | H | 2.6907  | -3.0707 | 0.2319  |
| H | 0.6929  | 0.7807  | -0.1909 | H | 1.1532  | -0.5616 | -0.5347 |
| H | -1.5993 | 1.4879  | 1.6802  | H | 1.9585  | -2.6966 | -2.5548 |
| H | -0.4592 | 0.1666  | 1.8157  | H | 1.162   | -1.1708 | -2.86   |
| H | 1.364   | 1.6269  | 2.3307  | H | 3.1356  | 0.0964  | -2.3799 |
| H | 0.026   | 2.0446  | 3.3621  | H | 3.5655  | -1.1754 | -3.487  |
| H | -1.7635 | 3.7388  | 1.5195  | H | 3.8006  | -3.6328 | -1.6268 |
| H | -1.2354 | 4.1153  | 3.1582  | H | 4.9328  | -3.0972 | -2.8667 |
| H | -0.9619 | 5.2706  | 1.8564  | H | 5.4936  | -3.3697 | -1.2189 |
| H | 0.8878  | 5.0861  | -1.0338 | H | 4.6816  | -1.8577 | 1.7668  |
| H | -0.056  | -0.5431 | -2.3231 | H | 0.8595  | -4.4864 | -0.3085 |
| H | -4.709  | 2.3262  | -0.7262 | H | -2.5667 | -0.6397 | -2.613  |
| H | -5.7071 | 2.4801  | -2.1615 | H | -3.609  | -1.5588 | -3.6839 |
| H | -4.5916 | 0.5734  | -3.2423 | H | -3.2167 | -3.629  | -2.4145 |
| H | -3.4179 | 1.7848  | -2.7416 | H | -1.6971 | -2.9093 | -2.9316 |
| H | -6.7738 | 0.3621  | -1.7911 | H | -5.2107 | -1.9867 | -1.9465 |
| H | -6.9093 | 1.3208  | -0.3298 | H | -4.917  | -0.2603 | -2.0286 |
| H | -4.3814 | -3.0123 | 0.0603  | H | -3.7556 | -2.5327 | 2.2863  |
| H | -2.8505 | -2.5785 | -0.5998 | H | -2.2104 | -3.2245 | 1.9345  |
| H | -2.5046 | -0.8986 | 1.2257  | H | -1.2115 | -1.0152 | 1.5636  |
| H | -5.1832 | -1.7371 | 2.3757  | H | -3.9097 | 0.233   | 2.2687  |
| H | -4.057  | -0.5579 | 3.0198  | H | -2.4504 | 1.0782  | 1.8243  |
| H | -5.941  | 0.4992  | 1.8175  | H | -4.0242 | 0.9681  | -0.0574 |
| H | -4.3933 | 0.9327  | 1.1427  | H | -2.4916 | 0.227   | -0.434  |
| H | -0.6865 | -3.9396 | 2.2589  | H | -0.5414 | 0.0412  | 5.0529  |
| H | -2.5271 | -4.3157 | 3.5988  | H | -2.0771 | -1.566  | 5.6089  |
| H | -4.1044 | -3.3822 | 3.4598  | H | -3.1576 | -2.4217 | 4.3987  |
| H | -6.4334 | -2.312  | 0.6195  | H | -5.4381 | -1.2463 | 1.5866  |
| H | -7.5391 | -0.9405 | 0.6989  | H | -6.0795 | -0.2892 | 0.2519  |

|             |                  |                  |                  |             |                  |                  |                  |
|-------------|------------------|------------------|------------------|-------------|------------------|------------------|------------------|
| H           | -7.2071          | -1.7192          | -0.8457          | H           | -6.1409          | -2.0483          | 0.1865           |
| H           | 4.5082           | -4.5796          | 1.9242           | H           | -2.0507          | 4.8266           | -3.155           |
| H           | 2.9813           | -5.2797          | 1.3854           | H           | -3.4059          | 3.7645           | -2.7702          |
| H           | 6.1252           | -3.8223          | -0.0701          | H           | -1.1262          | 6.2174           | -1.0621          |
| H           | 5.8493           | -4.5147          | -1.6591          | H           | -2.1836          | 6.4108           | 0.3256           |
| H           | 2.2944           | -1.0207          | -1.1854          | H           | -0.3944          | 1.7184           | 0.6857           |
| H           | 2.3595           | -0.6571          | 0.5149           | H           | 0.3297           | 1.5136           | -0.8842          |
| H           | 4.6768           | 0.1547           | 0.3405           | H           | 1.9106           | 3.3478           | -0.503           |
| H           | 4.4224           | -0.3303          | -2.6715          | H           | 0.7237           | 3.5553           | 2.3088           |
| H           | 5.7859           | 0.4023           | -1.837           | H           | 2.109            | 4.4392           | 1.685            |
| H           | 6.2069           | -1.9771          | -2.329           | H           | 0.0579           | 5.8062           | 1.5879           |
| H           | 6.2593           | -1.6162          | -0.6112          | H           | 0.7731           | 5.5477           | 0.005            |
| H           | 3.9504           | 2.1454           | -2.7624          | H           | 2.3275           | 1.8612           | 3.0274           |
| H           | 3.2314           | -2.2532          | -2.8913          | H           | -1.4951          | 3.2689           | 2.0893           |
| H           | 4.4181           | -3.494           | -3.2812          | H           | -2.2241          | 4.8693           | 2.147            |
| H           | 2.9851           | -3.8988          | -2.327           | H           | -2.9398          | 3.601            | 1.1437           |
| H           | 1.8452           | -1.8018          | 1.9887           | H           | -0.7212          | 1.2526           | -2.4951          |
| H           | -4.2901          | -2.1341          | -2.6133          | H           | -3.6585          | -4.424           | 0.2269           |
| H           | 3.6923           | -5.4906          | -0.8591          | H           | -3.7666          | 4.7396           | -0.6474          |
| H           | 5.051            | -6.0226          | 0.1175           | H           | -3.4837          | 6.0845           | -1.7401          |
| <b>3a-3</b> | <b>X axis(Å)</b> | <b>Y axis(Å)</b> | <b>Z axis(Å)</b> | <b>3a-4</b> | <b>X axis(Å)</b> | <b>Y axis(Å)</b> | <b>Z axis(Å)</b> |
| C           | 5.5885           | 0.2473           | -1.6236          | C           | -5.1748          | -2.3383          | -1.484           |
| C           | 5.411            | 0.4874           | -0.1295          | C           | -4.6447          | -2.7324          | -0.1122          |
| C           | 4.0451           | -0.0273          | 0.3501           | C           | -3.6383          | -1.701           | 0.4117           |
| C           | 3.8678           | -1.554           | 0.0492           | C           | -4.2439          | -0.2549          | 0.473            |
| C           | 4.1208           | -1.8867          | -1.4689          | C           | -4.8916          | 0.1704           | -0.8997          |
| C           | 5.4404           | -1.2298          | -1.9673          | C           | -5.8134          | -0.9553          | -1.4499          |
| C           | 2.5058           | -2.1353          | 0.5012           | C           | -3.2324          | 0.8261           | 0.9435           |
| C           | 1.2962           | -1.7708          | -0.3796          | C           | -2.1739          | 1.2374           | -0.0981          |
| C           | 1.5842           | -1.9821          | -1.875           | C           | -2.8136          | 1.5757           | -1.4541          |
| C           | 2.9267           | -1.4116          | -2.333           | C           | -3.7961          | 0.5113           | -1.9394          |
| C           | 4.3071           | -3.415           | -1.6993          | C           | -5.8092          | 1.4174           | -0.7377          |
| C           | 3.8807           | 0.2924           | 1.8181           | C           | -3.1271          | -2.1571          | 1.7574           |
| O           | 4.4075           | -0.3013          | 2.7488           | O           | -3.7563          | -2.1516          | 2.8065           |
| O           | 4.8812           | -2.2739          | 0.7956           | O           | -5.3224          | -0.258           | 1.4404           |
| C           | 0.0288           | -2.5222          | -0.0183          | C           | -1.2867          | 2.388            | 0.3259           |
| O           | -1.1547          | -1.995           | -0.5474          | O           | -0.1575          | 2.5787           | -0.4745          |
| C           | -0.0845          | -3.6102          | 0.7423           | C           | -1.4389          | 3.2186           | 1.3559           |
| C           | -3.2478          | -2.7169          | -2.5321          | C           | 0.7413           | 4.5583           | -2.477           |
| C           | -2.5669          | -3.6658          | -1.5539          | C           | 0.0593           | 4.8765           | -1.1516          |
| C           | -2.2107          | -2.9405          | -0.2509          | C           | 0.4327           | 3.8381           | -0.0848          |
| C           | -3.474           | -2.3053          | 0.4317           | C           | 1.9817           | 3.7701           | 0.1377           |
| C           | -4.2988          | -1.3988          | -0.56            | C           | 2.7611           | 3.5308           | -1.2103          |
| C           | -4.5093          | -2.1153          | -1.9249          | C           | 2.2561           | 4.4984           | -2.3197          |
| C           | -3.1393          | -1.5263          | 1.7309           | C           | 2.4141           | 2.7297           | 1.1995           |
| C           | -2.5011          | -0.1439          | 1.5136           | C           | 2.377            | 1.2604           | 0.7439           |
| C           | -3.3215          | 0.7062           | 0.5323           | C           | 3.0613           | 1.0473           | -0.6171          |

|   |         |         |         |   |         |         |         |
|---|---------|---------|---------|---|---------|---------|---------|
| C | -3.5911 | -0.0376 | -0.7773 | C | 2.6128  | 2.0585  | -1.6749 |
| C | -2.2536 | 0.5353  | 2.8487  | C | 2.9605  | 0.3757  | 1.8324  |
| C | -0.8735 | 0.4719  | 3.4125  | C | 2.0299  | -0.428  | 2.6717  |
| C | -3.17   | 1.1959  | 3.5754  | C | 4.2676  | 0.2615  | 2.1231  |
| O | 0.0682  | -0.0412 | 2.8192  | O | 0.8273  | -0.5111 | 2.4497  |
| C | -5.7305 | -1.1161 | -0.0156 | C | 4.2796  | 3.837   | -1.0532 |
| C | -1.5063 | -3.8972 | 0.6834  | C | -0.3169 | 4.1312  | 1.1947  |
| O | -2.0323 | -4.7943 | 1.3281  | O | -0.0458 | 5.008   | 2.0035  |
| C | -2.1818 | 4.3935  | -2.3717 | C | 4.7482  | -3.6262 | -0.1894 |
| C | -1.2571 | 3.3112  | -1.8627 | C | 3.3867  | -3.5703 | 0.4571  |
| C | -0.5822 | 3.389   | -0.6886 | C | 2.2175  | -3.6139 | -0.2273 |
| C | -0.6927 | 4.633   | 0.2183  | C | 2.1957  | -3.7796 | -1.7582 |
| C | -1.3402 | 5.8383  | -0.5172 | C | 3.5846  | -3.5    | -2.3974 |
| C | 0.3213  | 2.2966  | -0.1296 | C | 0.8404  | -3.5069 | 0.4169  |
| C | 1.7114  | 2.8178  | 0.2725  | C | -0.072  | -2.4609 | -0.26   |
| C | 1.577   | 3.9785  | 1.268   | C | -0.1846 | -2.7709 | -1.7609 |
| C | 0.7152  | 5.0953  | 0.6804  | C | 1.1964  | -2.7926 | -2.4125 |
| C | 2.589   | 1.6873  | 0.757   | C | -1.4319 | -2.323  | 0.3975  |
| C | 3.0119  | 1.4453  | 1.997   | C | -1.7448 | -2.5941 | 1.6642  |
| O | 3.028   | 0.8141  | -0.2408 | O | -2.4452 | -1.7845 | -0.3981 |
| C | -1.5573 | 4.2892  | 1.4546  | C | 1.7793  | -5.2326 | -2.089  |
| C | -1.1869 | 2.1308  | -2.7836 | C | 3.4438  | -3.5034 | 1.9481  |
| O | -1.7814 | 2.0944  | -3.8562 | O | 4.4392  | -3.1277 | 2.5577  |
| O | -4.3654 | -3.3813 | 0.8185  | O | 2.4158  | 5.0611  | 0.6337  |
| C | -2.5622 | 5.4316  | -1.324  | C | 4.7239  | -4.1433 | -1.6221 |
| H | 4.8666  | 0.8438  | -2.1927 | H | -4.3691 | -2.3692 | -2.2258 |
| H | 6.5832  | 0.5919  | -1.9299 | H | -5.9211 | -3.0731 | -1.8082 |
| H | 6.2232  | 0.0011  | 0.4251  | H | -5.4818 | -2.8428 | 0.5888  |
| H | 5.5076  | 1.5645  | 0.0581  | H | -4.1741 | -3.7206 | -0.1961 |
| H | 6.2982  | -1.7596 | -1.5308 | H | -6.7192 | -1.0204 | -0.8315 |
| H | 5.5324  | -1.3518 | -3.0543 | H | -6.156  | -0.6985 | -2.4606 |
| H | 2.3007  | -1.8459 | 1.5403  | H | -2.7337 | 0.4944  | 1.8636  |
| H | 2.6117  | -3.2272 | 0.5514  | H | -3.8016 | 1.7112  | 1.2584  |
| H | 1.079   | -0.7105 | -0.2192 | H | -1.4965 | 0.3925  | -0.2486 |
| H | 1.5458  | -3.0519 | -2.1173 | H | -3.3213 | 2.547   | -1.3995 |
| H | 0.7888  | -1.5169 | -2.4725 | H | -2.0313 | 1.6936  | -2.2157 |
| H | 2.857   | -0.3201 | -2.3483 | H | -3.2303 | -0.3807 | -2.2249 |
| H | 3.0867  | -1.7023 | -3.3798 | H | -4.2616 | 0.8667  | -2.8682 |
| H | 3.4515  | -4.0036 | -1.3582 | H | -5.2843 | 2.2777  | -0.3142 |
| H | 4.4449  | -3.632  | -2.7654 | H | -6.2142 | 1.7296  | -1.7078 |
| H | 5.1913  | -3.7986 | -1.1782 | H | -6.6655 | 1.2089  | -0.0867 |
| H | 4.8069  | -2.0206 | 1.7404  | H | -4.9919 | -0.6405 | 2.2806  |
| H | 0.6456  | -4.1923 | 1.2705  | H | -2.1896 | 3.2772  | 2.12    |
| H | -2.5564 | -1.9237 | -2.8379 | H | 0.3643  | 3.6119  | -2.8808 |
| H | -3.512  | -3.2658 | -3.4436 | H | 0.4842  | 5.3313  | -3.2108 |
| H | -3.2197 | -4.5244 | -1.3523 | H | 0.3354  | 5.8859  | -0.8219 |
| H | -1.6638 | -4.0649 | -2.0334 | H | -1.0255 | 4.8889  | -1.3184 |

|             |                  |                  |                  |             |                  |                  |                  |
|-------------|------------------|------------------|------------------|-------------|------------------|------------------|------------------|
| H           | -5.2375          | -2.9286          | -1.8014          | H           | 2.6063           | 5.5167           | -2.1015          |
| H           | -4.9545          | -1.4198          | -2.6481          | H           | 2.7027           | 4.227            | -3.285           |
| H           | -4.0605          | -1.4134          | 2.3198           | H           | 3.4286           | 2.9838           | 1.5379           |
| H           | -2.4938          | -2.1354          | 2.3769           | H           | 1.8071           | 2.8463           | 2.107            |
| H           | -1.5276          | -0.2802          | 1.0363           | H           | 1.33             | 0.9758           | 0.602            |
| H           | -4.2733          | 1.0184           | 0.9747           | H           | 4.1518           | 1.0963           | -0.5252          |
| H           | -2.7813          | 1.6313           | 0.3074           | H           | 2.8421           | 0.0342           | -0.9784          |
| H           | -4.2032          | 0.605            | -1.4236          | H           | 3.2061           | 1.8939           | -2.5841          |
| H           | -2.6438          | -0.17            | -1.3089          | H           | 1.5812           | 1.8347           | -1.962           |
| H           | -0.7389          | 0.9302           | 4.407            | H           | 2.4906           | -0.9696          | 3.5158           |
| H           | -2.9378          | 1.6653           | 4.5271           | H           | 4.6409           | -0.3923          | 2.9079           |
| H           | -4.2016          | 1.2769           | 3.2455           | H           | 5.0217           | 0.8223           | 1.5793           |
| H           | -5.7236          | -0.672           | 0.9833           | H           | 4.7507           | 3.2501           | -0.2604          |
| H           | -6.2682          | -0.4262          | -0.6769          | H           | 4.8174           | 3.6185           | -1.9835          |
| H           | -6.3297          | -2.0316          | 0.045            | H           | 4.4584           | 4.8929           | -0.8212          |
| H           | -1.6906          | 4.8966           | -3.2146          | H           | 5.178            | -2.6162          | -0.1757          |
| H           | -3.1106          | 3.9548           | -2.7568          | H           | 5.4222           | -4.269           | 0.3901           |
| H           | -0.6153          | 6.2973           | -1.2035          | H           | 3.7704           | -2.4176          | -2.4373          |
| H           | -1.6178          | 6.6205           | 0.2005           | H           | 3.6043           | -3.8514          | -3.4368          |
| H           | -0.1725          | 1.8519           | 0.7415           | H           | 0.3632           | -4.495           | 0.3891           |
| H           | 0.4589           | 1.4768           | -0.8349          | H           | 0.9233           | -3.2382          | 1.4714           |
| H           | 2.1959           | 3.2226           | -0.6287          | H           | 0.4118           | -1.4777          | -0.1678          |
| H           | 1.1444           | 3.6348           | 2.215            | H           | -0.7019          | -3.7245          | -1.9203          |
| H           | 2.568            | 4.3855           | 1.5057           | H           | -0.7835          | -2.0035          | -2.2674          |
| H           | 0.6221           | 5.9002           | 1.4209           | H           | 1.0828           | -3.0253          | -3.4792          |
| H           | 1.2599           | 5.5253           | -0.1716          | H           | 1.6015           | -1.7723          | -2.366           |
| H           | 2.8182           | 1.9436           | 2.9265           | H           | -1.1523          | -2.9537          | 2.4828           |
| H           | -2.5594          | 3.9521           | 1.1694           | H           | 0.7721           | -5.4694          | -1.7312          |
| H           | -1.1174          | 3.4953           | 2.0653           | H           | 1.7862           | -5.4062          | -3.1713          |
| H           | -1.6769          | 5.1638           | 2.1045           | H           | 2.4564           | -5.9631          | -1.6329          |
| H           | -0.5781          | 1.2764           | -2.4642          | H           | 2.5406           | -3.8128          | 2.4925           |
| H           | -3.8586          | -4.0368          | 1.3435           | H           | 1.8861           | 5.2808           | 1.4295           |
| H           | -3.3424          | 5.0323           | -0.666           | H           | 4.622            | -5.2345          | -1.6258          |
| H           | -2.9931          | 6.3099           | -1.8186          | H           | 5.6802           | -3.9188          | -2.1086          |
| <b>3a-5</b> | <b>X axis(Å)</b> | <b>Y axis(Å)</b> | <b>Z axis(Å)</b> | <b>3a-6</b> | <b>X axis(Å)</b> | <b>Y axis(Å)</b> | <b>Z axis(Å)</b> |
| C           | -3.336           | 4.2121           | -1.0331          | C           | 3.6849           | -4.3915          | 0.1404           |
| C           | -3.1423          | 3.8689           | 0.4389           | C           | 3.4817           | -3.5968          | -1.1441          |
| C           | -1.8333          | 3.0972           | 0.6524           | C           | 2.7315           | -2.2891          | -0.8623          |
| C           | -0.5914          | 3.91             | 0.1447           | C           | 3.4886           | -1.3998          | 0.1875           |
| C           | -0.7644          | 4.3646           | -1.3534          | C           | 3.824            | -2.1902          | 1.5088           |
| C           | -2.16            | 5.0169           | -1.5744          | C           | 4.4465           | -3.578           | 1.1802           |
| C           | 0.7634           | 3.178            | 0.3266           | C           | 2.7493           | -0.0802          | 0.5236           |
| C           | 1.0221           | 2.0273           | -0.6596          | C           | 1.5283           | -0.24            | 1.4389           |
| C           | 0.752            | 2.4321           | -2.1165          | C           | 1.8599           | -1.0396          | 2.7056           |
| C           | -0.5776          | 3.162            | -2.3127          | C           | 2.5556           | -2.3653          | 2.3836           |
| C           | 0.2716           | 5.4587           | -1.7444          | C           | 4.895            | -1.4465          | 2.3605           |
| C           | -1.7032          | 2.7197           | 2.1112           | C           | 2.4938           | -1.5506          | -2.1613          |



|   |         |         |         |   |         |         |         |
|---|---------|---------|---------|---|---------|---------|---------|
| O | -1.4012 | 3.4749  | 3.0251  | O | 3.3201  | -0.9121 | -2.7984 |
| O | -0.5    | 5.1253  | 0.9292  | O | 4.7633  | -1.028  | -0.391  |
| C | 2.4128  | 1.439   | -0.5626 | C | 0.8789  | 1.0924  | 1.7239  |
| O | 2.502   | 0.0656  | -0.8047 | O | -0.2216 | 1.4063  | 0.922   |
| C | 3.5476  | 2.0765  | -0.279  | C | 1.2314  | 1.9821  | 2.6501  |
| C | 3.5407  | -1.6744 | -2.9642 | C | -3.1517 | 1.7821  | 1.1656  |
| C | 4.2198  | -0.4254 | -2.4158 | C | -2.1007 | 2.2488  | 2.1647  |
| C | 3.9089  | -0.2508 | -0.9232 | C | -0.7958 | 2.6256  | 1.4501  |
| C | 4.3678  | -1.496  | -0.0877 | C | -1.0248 | 3.7473  | 0.3742  |
| C | 3.7921  | -2.8451 | -0.6603 | C | -2.1759 | 3.3763  | -0.6359 |
| C | 3.9799  | -2.9196 | -2.2033 | C | -3.4322 | 2.8527  | 0.1187  |
| C | 4.0599  | -1.3825 | 1.4274  | C | 0.2622  | 4.1376  | -0.3978 |
| C | 2.5843  | -1.5932 | 1.8257  | C | 0.7271  | 3.118   | -1.4554 |
| C | 2.0267  | -2.8867 | 1.2091  | C | -0.423  | 2.7475  | -2.4074 |
| C | 2.295   | -2.9939 | -0.2944 | C | -1.6863 | 2.3192  | -1.6573 |
| C | 2.341   | -1.577  | 3.3301  | C | 1.9905  | 3.6052  | -2.1482 |
| C | 0.9523  | -1.2876 | 3.7955  | C | 3.261   | 3.5139  | -1.3672 |
| C | 3.2487  | -1.7653 | 4.3029  | C | 2.1003  | 4.0787  | -3.4002 |
| O | 0.0239  | -1.0646 | 3.0282  | O | 3.3     | 3.0933  | -0.217  |
| C | 4.551   | -4.0811 | -0.0927 | C | -2.6628 | 4.6244  | -1.4303 |
| C | 4.5425  | 1.0258  | -0.4179 | C | 0.2385  | 3.0297  | 2.4777  |
| O | 5.7248  | 1.1879  | -0.1493 | O | 0.2609  | 4.0838  | 3.0981  |
| C | -5.595  | -4.1433 | -0.6093 | C | -5.0916 | -2.9372 | 1.297   |
| C | -5.2803 | -2.7418 | -0.1382 | C | -3.6316 | -2.5912 | 1.1144  |
| C | -4.1394 | -2.0797 | -0.4535 | C | -3.062  | -2.3287 | -0.0885 |
| C | -3.0423 | -2.7426 | -1.3155 | C | -3.893  | -2.3545 | -1.3856 |
| C | -3.2555 | -4.2743 | -1.4658 | C | -5.2629 | -3.0605 | -1.1915 |
| C | -3.8049 | -0.655  | -0.0246 | C | -1.5959 | -1.9685 | -0.2906 |
| C | -2.4249 | -0.5513 | 0.6497  | C | -0.8978 | -2.7594 | -1.4146 |
| C | -1.3347 | -1.1108 | -0.2701 | C | -1.7049 | -2.6723 | -2.7173 |
| C | -1.6463 | -2.5522 | -0.6634 | C | -3.1442 | -3.1326 | -2.4984 |
| C | -2.1287 | 0.8709  | 1.053   | C | 0.5441  | -2.3156 | -1.557  |
| C | -1.9756 | 1.3057  | 2.3019  | C | 1.1064  | -1.6746 | -2.5801 |
| O | -1.983  | 1.8015  | 0.0267  | O | 1.3767  | -2.6351 | -0.4806 |
| C | -3.0534 | -2.1036 | -2.7249 | C | -4.1475 | -0.8987 | -1.8435 |
| C | -6.3738 | -2.1531 | 0.6981  | C | -2.8841 | -2.5332 | 2.4112  |
| O | -7.3598 | -2.7952 | 1.0451  | O | -3.3745 | -2.9011 | 3.4735  |
| O | 5.8104  | -1.5984 | -0.2003 | O | -1.4679 | 4.9426  | 1.063   |
| C | -4.7058 | -4.6303 | -1.7458 | C | -5.9613 | -2.6254 | 0.0863  |
| H | -3.4725 | 3.2976  | -1.6213 | H | 2.719   | -4.7147 | 0.5446  |
| H | -4.2573 | 4.7946  | -1.1506 | H | 4.2468  | -5.3055 | -0.0853 |
| H | -3.1524 | 4.7867  | 1.04    | H | 4.452   | -3.3924 | -1.6137 |
| H | -4.0017 | 3.2706  | 0.7681  | H | 2.9186  | -4.2214 | -1.8495 |
| H | -2.1816 | 6.0026  | -1.0897 | H | 5.4701  | -3.4387 | 0.8061  |
| H | -2.3209 | 5.2036  | -2.644  | H | 4.5398  | -4.1731 | 2.0978  |
| H | 0.8545  | 2.8047  | 1.3551  | H | 2.4544  | 0.4216  | -0.4054 |
| H | 1.5651  | 3.9242  | 0.2512  | H | 3.4616  | 0.6171  | 0.9853  |

|   |         |         |         |   |         |         |         |
|---|---------|---------|---------|---|---------|---------|---------|
| H | 0.3338  | 1.2196  | -0.4016 | H | 0.7745  | -0.8193 | 0.9044  |
| H | 1.5676  | 3.0643  | -2.4901 | H | 2.4899  | -0.4534 | 3.3843  |
| H | 0.7569  | 1.5376  | -2.7536 | H | 0.936   | -1.251  | 3.2595  |
| H | -1.3927 | 2.4401  | -2.2072 | H | 1.8345  | -3.0317 | 1.8998  |
| H | -0.6335 | 3.5052  | -3.3543 | H | 2.8187  | -2.8583 | 3.3286  |
| H | 1.3058  | 5.1334  | -1.6042 | H | 4.5987  | -0.4258 | 2.6163  |
| H | 0.1603  | 5.7385  | -2.7989 | H | 5.0797  | -1.978  | 3.3016  |
| H | 0.1376  | 6.3729  | -1.1554 | H | 5.8556  | -1.3809 | 1.8374  |
| H | -0.5065 | 4.8837  | 1.8798  | H | 4.596   | -0.5486 | -1.2289 |
| H | 3.7494  | 3.1057  | -0.0531 | H | 2.0357  | 1.9831  | 3.36    |
| H | 2.451   | -1.5666 | -2.9193 | H | -2.8298 | 0.8546  | 0.682   |
| H | 3.7967  | -1.7895 | -4.024  | H | -4.0797 | 1.5454  | 1.6994  |
| H | 5.3028  | -0.4852 | -2.5813 | H | -2.4858 | 3.0998  | 2.7403  |
| H | 3.8637  | 0.4395  | -2.9903 | H | -1.927  | 1.4377  | 2.8838  |
| H | 5.0409  | -3.0894 | -2.4328 | H | -3.9267 | 3.6911  | 0.6281  |
| H | 3.4425  | -3.7886 | -2.6044 | H | -4.1648 | 2.4627  | -0.5998 |
| H | 4.6915  | -2.1146 | 1.9469  | H | 0.1054  | 5.1108  | -0.8842 |
| H | 4.4084  | -0.4146 | 1.8101  | H | 1.0664  | 4.34    | 0.32    |
| H | 2.0182  | -0.7505 | 1.4152  | H | 1.0038  | 2.1864  | -0.9551 |
| H | 2.4471  | -3.7598 | 1.7232  | H | -0.6704 | 3.5867  | -3.0667 |
| H | 0.9434  | -2.9464 | 1.369   | H | -0.1073 | 1.926   | -3.0635 |
| H | 1.9194  | -3.9641 | -0.6451 | H | -2.4756 | 2.1179  | -2.3932 |
| H | 1.6903  | -2.2448 | -0.8141 | H | -1.4934 | 1.3616  | -1.1672 |
| H | 0.8004  | -1.282  | 4.8883  | H | 4.1745  | 3.8505  | -1.8861 |
| H | 2.9927  | -1.7246 | 5.3584  | H | 3.0506  | 4.3931  | -3.8233 |
| H | 4.2914  | -1.9758 | 4.0888  | H | 1.2418  | 4.1783  | -4.0558 |
| H | 4.5364  | -4.1241 | 0.9994  | H | -1.8548 | 5.1269  | -1.9682 |
| H | 4.1044  | -5.0126 | -0.4606 | H | -3.4207 | 4.3415  | -2.1706 |
| H | 5.6026  | -4.0881 | -0.4008 | H | -3.1227 | 5.3701  | -0.7721 |
| H | -5.4936 | -4.8247 | 0.2454  | H | -5.1644 | -4.0082 | 1.5262  |
| H | -6.6357 | -4.2088 | -0.95   | H | -5.5097 | -2.3967 | 2.1553  |
| H | -2.9493 | -4.7916 | -0.546  | H | -5.1245 | -4.1498 | -1.1512 |
| H | -2.6184 | -4.6729 | -2.2653 | H | -5.9174 | -2.8676 | -2.0508 |
| H | -3.8442 | -0.0096 | -0.9118 | H | -1.5303 | -0.8947 | -0.5001 |
| H | -4.5422 | -0.2405 | 0.6658  | H | -1.0202 | -2.1346 | 0.6207  |
| H | -2.4497 | -1.1708 | 1.558   | H | -0.8743 | -3.8186 | -1.1188 |
| H | -1.2283 | -0.4962 | -1.1719 | H | -1.6999 | -1.6506 | -3.1147 |
| H | -0.3648 | -1.0804 | 0.2388  | H | -1.2445 | -3.3076 | -3.4846 |
| H | -0.8629 | -2.9144 | -1.3415 | H | -3.6913 | -3.05   | -3.4465 |
| H | -1.5751 | -3.1687 | 0.2434  | H | -3.1215 | -4.2028 | -2.2501 |
| H | -2.0097 | 0.7779  | 3.2355  | H | 0.7004  | -1.3137 | -3.5053 |
| H | -2.8188 | -1.0347 | -2.7036 | H | -4.6637 | -0.3142 | -1.0742 |
| H | -2.313  | -2.5806 | -3.3774 | H | -3.2204 | -0.3656 | -2.0728 |
| H | -4.0322 | -2.2026 | -3.2067 | H | -4.7653 | -0.8741 | -2.7485 |
| H | -6.2669 | -1.1041 | 0.9993  | H | -1.8635 | -2.1313 | 2.3853  |
| H | 6.2059  | -0.7385 | 0.0571  | H | -0.8206 | 5.1522  | 1.7699  |
| H | -5.0336 | -4.191  | -2.6948 | H | -6.1897 | -1.554  | 0.0541  |

|             |                  |                  |                  |             |                  |                  |                  |
|-------------|------------------|------------------|------------------|-------------|------------------|------------------|------------------|
| H           | -4.8105          | -5.7162          | -1.8531          | H           | -6.9223          | -3.1442          | 0.1824           |
| <b>3a-7</b> | <b>X axis(Å)</b> | <b>Y axis(Å)</b> | <b>Z axis(Å)</b> | <b>3a-8</b> | <b>X axis(Å)</b> | <b>Y axis(Å)</b> | <b>Z axis(Å)</b> |
| C           | -4.9508          | -2.7701          | -1.2239          | C           | -3.1633          | 4.1574           | -1.2685          |
| C           | -4.3615          | -2.937           | 0.17             | C           | -3.0527          | 3.8907           | 0.2281           |
| C           | -3.4255          | -1.7718          | 0.522            | C           | -1.7713          | 3.108            | 0.5483           |
| C           | -4.1485          | -0.3844          | 0.4187           | C           | -0.4928          | 3.8764           | 0.0694           |
| C           | -4.8547          | -0.1928          | -0.978           | C           | -0.5752          | 4.2582           | -1.456           |
| C           | -5.6955          | -1.4472          | -1.3508          | C           | -1.9468          | 4.9145           | -1.7882          |
| C           | -3.2282          | 0.828            | 0.7184           | C           | 0.837            | 3.1391           | 0.3615           |
| C           | -2.2267          | 1.1824           | -0.3963          | C           | 1.1432           | 1.935            | -0.5476          |
| C           | -2.904           | 1.2807           | -1.7712          | C           | 0.959            | 2.2752           | -2.035           |
| C           | -3.8094          | 0.0909           | -2.0855          | C           | -0.3492          | 3.0071           | -2.3417          |
| C           | -5.8649          | 0.9913           | -0.9514          | C           | 0.4956           | 5.3208           | -1.8412          |
| C           | -2.8413          | -2.0192          | 1.8929           | C           | -1.7288          | 2.7932           | 2.0273           |
| O           | -3.429           | -1.9021          | 2.9594           | O           | -1.4846          | 3.5862           | 2.926            |
| O           | -5.2037          | -0.354           | 1.4111           | O           | -0.429           | 5.1281           | 0.798            |
| C           | -1.4415          | 2.4523           | -0.1513          | C           | 2.5272           | 1.3502           | -0.3427          |
| O           | -0.2088          | 2.5145           | -0.8048          | O           | 2.7022           | 0.0421           | -0.8077          |
| C           | -1.773           | 3.4907           | 0.6137           | C           | 3.5756           | 1.9272           | 0.243            |
| C           | 1.1578           | 4.0168           | -2.9511          | C           | 4.2172           | -1.4472          | -2.8815          |
| C           | 0.2191           | 4.6073           | -1.9051          | C           | 4.7346           | -0.2763          | -2.0556          |
| C           | 0.3277           | 3.8379           | -0.5837          | C           | 4.1058           | -0.2782          | -0.6573          |
| C           | 1.7935           | 3.8444           | -0.0261          | C           | 4.3847           | -1.6203          | 0.1099           |
| C           | 2.8359           | 3.3324           | -1.0906          | C           | 3.9856           | -2.8895          | -0.7368          |
| C           | 2.6032           | 4.0224           | -2.4662          | C           | 4.5135           | -2.7752          | -2.196           |
| C           | 1.9522           | 3.0622           | 1.301            | C           | 3.7242           | -1.6722          | 1.5134           |
| C           | 1.9516           | 1.5302           | 1.1637           | C           | 2.209            | -1.9366          | 1.5079           |
| C           | 2.9319           | 1.0454           | 0.084            | C           | 1.8606           | -3.1767          | 0.6709           |
| C           | 2.7559           | 1.7908           | -1.2424          | C           | 2.448            | -3.0886          | -0.7399          |
| C           | 2.1856           | 0.8982           | 2.5246           | C           | 1.6766           | -1.9796          | 2.9289           |
| C           | 1.0052           | 0.3553           | 3.2529           | C           | 1.1465           | -0.7057          | 3.4976           |
| C           | 3.3717           | 0.7966           | 3.1462           | C           | 1.6264           | -3.0594          | 3.7258           |
| O           | -0.1144          | 0.3014           | 2.7584           | O           | 1.0779           | 0.3339           | 2.8526           |
| C           | 4.2935           | 3.6992           | -0.6835          | C           | 4.6373           | -4.1832          | -0.1628          |
| C           | -0.6539          | 4.3985           | 0.4203           | C           | 4.6085           | 0.9144           | 0.1234           |
| O           | -0.5447          | 5.4606           | 1.0177           | O           | 5.7231           | 1.037            | 0.613            |
| C           | 5.0258           | -3.3749          | -0.4546          | C           | -5.8815          | -3.945           | -0.5405          |
| C           | 3.7565           | -3.0769          | 0.3086           | C           | -5.4941          | -2.5557          | -0.0878          |
| C           | 2.5193           | -3.4566          | -0.0976          | C           | -4.3238          | -1.9549          | -0.4173          |
| C           | 2.3261           | -4.2713          | -1.392           | C           | -3.2698          | -2.6784          | -1.2834          |
| C           | 3.5875           | -4.2461          | -2.2991          | C           | -3.5623          | -4.1981          | -1.4234          |
| C           | 1.2252           | -3.1563          | 0.6533           | C           | -3.9151          | -0.5464          | -0.0018          |
| C           | 0.1049           | -2.5746          | -0.2381          | C           | -2.5241          | -0.5027          | 0.6582           |
| C           | -0.1298          | -3.482           | -1.4548          | C           | -1.4715          | -1.1306          | -0.2605          |
| C           | 1.1631           | -3.6941          | -2.236           | C           | -1.8627          | -2.5561          | -0.6402          |
| C           | -1.2008          | -2.3237          | 0.4891           | C           | -2.1588          | 0.9116           | 1.0277           |
| C           | -1.4535          | -2.4426          | 1.7918           | C           | -2.0439          | 1.3927           | 2.2636           |

|   |         |         |         |   |         |         |         |
|---|---------|---------|---------|---|---------|---------|---------|
| O | -2.2514 | -1.8733 | -0.3145 | O | -1.918  | 1.7892  | -0.0265 |
| C | 2.0184  | -5.7398 | -1.0128 | C | -3.2575 | -2.0474 | -2.6961 |
| C | 4.0082  | -2.3505 | 1.5908  | C | -6.553  | -1.9019 | 0.7442  |
| O | 5.0897  | -1.8417 | 1.8649  | O | -7.5435 | -2.504  | 1.1451  |
| O | 2.1543  | 5.218   | 0.2639  | O | 5.8147  | -1.7244 | 0.3263  |
| C | 4.8711  | -4.4576 | -1.5139 | C | -5.0319 | -4.4816 | -1.685  |
| H | -4.1614 | -2.8387 | -1.9807 | H | -3.2846 | 3.2149  | -1.8144 |
| H | -5.6435 | -3.5957 | -1.4251 | H | -4.067  | 4.7462  | -1.4652 |
| H | -5.1713 | -3.0148 | 0.9065  | H | -3.0753 | 4.8391  | 0.7792  |
| H | -3.8189 | -3.8908 | 0.2007  | H | -3.9399 | 3.326   | 0.5426  |
| H | -6.5813 | -1.4987 | -0.703  | H | -1.979  | 5.9258  | -1.36   |
| H | -6.0765 | -1.3521 | -2.3758 | H | -2.0469 | 5.0439  | -2.8737 |
| H | -2.6884 | 0.6626  | 1.6595  | H | 0.8669  | 2.8228  | 1.4121  |
| H | -3.8673 | 1.6945  | 0.9337  | H | 1.6491  | 3.8746  | 0.2891  |
| H | -1.4833 | 0.3806  | -0.4426 | H | 0.4378  | 1.1397  | -0.2905 |
| H | -3.4857 | 2.2088  | -1.84   | H | 1.8031  | 2.8808  | -2.389  |
| H | -2.1395 | 1.3526  | -2.5562 | H | 0.9882  | 1.3529  | -2.6304 |
| H | -3.1814 | -0.7855 | -2.271  | H | -1.178  | 2.2994  | -2.2468 |
| H | -4.3197 | 0.2856  | -3.0381 | H | -0.3423 | 3.298   | -3.4005 |
| H | -5.4006 | 1.9386  | -0.6653 | H | 1.5161  | 4.9921  | -1.6284 |
| H | -6.317  | 1.1375  | -1.9398 | H | 0.4462  | 5.5497  | -2.9126 |
| H | -6.6855 | 0.8082  | -0.2489 | H | 0.3417  | 6.2642  | -1.3055 |
| H | -4.8143 | -0.5697 | 2.2851  | H | -0.4586 | 4.9284  | 1.7579  |
| H | -2.6362 | 3.6802  | 1.2218  | H | 3.6991  | 2.8922  | 0.6948  |
| H | 0.8483  | 2.9972  | -3.2072 | H | 3.1411  | -1.3423 | -3.0599 |
| H | 1.0843  | 4.603   | -3.8747 | H | 4.6972  | -1.4344 | -3.8671 |
| H | 0.4482  | 5.6696  | -1.7548 | H | 5.8287  | -0.3224 | -1.9879 |
| H | -0.8055 | 4.5605  | -2.2962 | H | 4.4926  | 0.6533  | -2.5866 |
| H | 2.9273  | 5.0705  | -2.4068 | H | 5.6034  | -2.9137 | -2.2014 |
| H | 3.236   | 3.5546  | -3.2313 | H | 4.1037  | -3.5897 | -2.8072 |
| H | 2.8837  | 3.3856  | 1.7869  | H | 4.2248  | -2.4473 | 2.111   |
| H | 1.174   | 3.3695  | 2.0119  | H | 3.9392  | -0.7456 | 2.0612  |
| H | 0.963   | 1.2136  | 0.8218  | H | 1.7114  | -1.1015 | 1.0097  |
| H | 3.9708  | 1.1465  | 0.416   | H | 2.215   | -4.0939 | 1.153   |
| H | 2.7771  | -0.0261 | -0.0927 | H | 0.772   | -3.2805 | 0.5984  |
| H | 3.5299  | 1.4441  | -1.9398 | H | 2.1905  | -4.0076 | -1.2823 |
| H | 1.8059  | 1.4877  | -1.6931 | H | 1.9475  | -2.2791 | -1.2811 |
| H | 1.1975  | -0.0172 | 4.2735  | H | 0.8052  | -0.7512 | 4.5457  |
| H | 3.4909  | 0.3371  | 4.1232  | H | 1.2287  | -3.0241 | 4.7362  |
| H | 4.2841  | 1.1731  | 2.691   | H | 2.0009  | -4.0247 | 3.3992  |
| H | 4.5683  | 3.3121  | 0.3012  | H | 4.4044  | -4.342  | 0.8933  |
| H | 5.0118  | 3.2926  | -1.4055 | H | 4.2926  | -5.0679 | -0.7113 |
| H | 4.4467  | 4.7838  | -0.6573 | H | 5.7295  | -4.1603 | -0.2495 |
| H | 5.3645  | -2.4468 | -0.933  | H | -5.7999 | -4.6229 | 0.3189  |
| H | 5.8216  | -3.6905 | 0.2313  | H | -6.9288 | -3.964  | -0.8661 |
| H | 3.6609  | -3.28   | -2.8174 | H | -3.2722 | -4.7263 | -0.5046 |
| H | 3.5086  | -5.0082 | -3.0846 | H | -2.9554 | -4.6323 | -2.2279 |

|             |                  |                  |                  |              |                  |                  |                  |
|-------------|------------------|------------------|------------------|--------------|------------------|------------------|------------------|
| H           | 0.8836           | -4.0865          | 1.1257           | H            | -3.934           | 0.0952           | -0.8926          |
| H           | 1.3891           | -2.4444          | 1.4653           | H            | -4.6238          | -0.0941          | 0.6952           |
| H           | 0.4496           | -1.5976          | -0.6077          | H            | -2.568           | -1.102           | 1.5793           |
| H           | -0.5513          | -4.4448          | -1.1416          | H            | -0.5025          | -1.149           | 0.2485           |
| H           | -0.8662          | -3.0307          | -2.1319          | H            | -1.3306          | -0.5312          | -1.1678          |
| H           | 0.9577           | -4.3513          | -3.0909          | H            | -1.8211          | -3.1676          | 0.2719           |
| H           | 1.4604           | -2.7249          | -2.6603          | H            | -1.1027          | -2.9654          | -1.3183          |
| H           | -0.8315          | -2.7246          | 2.6183           | H            | -2.1569          | 0.9213           | 3.2201           |
| H           | 1.0952           | -5.838           | -0.433           | H            | -2.5461          | -2.5646          | -3.3503          |
| H           | 1.9038           | -6.3605          | -1.9089          | H            | -4.2431          | -2.1001          | -3.1714          |
| H           | 2.8184           | -6.1787          | -0.4066          | H            | -2.9694          | -0.9916          | -2.6823          |
| H           | 3.1754           | -2.2971          | 2.3034           | H            | -6.4149          | -0.842           | 0.9904           |
| H           | 1.4684           | 5.6044           | 0.8486           | H            | 6.1293           | -0.8982          | 0.7516           |
| H           | 4.8752           | -5.4473          | -1.0431          | H            | -5.3482          | -4.0303          | -2.6323          |
| H           | 5.7324           | -4.4328          | -2.1915          | H            | -5.1926          | -5.5613          | -1.7853          |
| <b>3a-9</b> | <b>X axis(Å)</b> | <b>Y axis(Å)</b> | <b>Z axis(Å)</b> | <b>3a-10</b> | <b>X axis(Å)</b> | <b>Y axis(Å)</b> | <b>Z axis(Å)</b> |
| C           | 5.3799           | 2.0132           | -0.8764          | C            | 2.865            | 4.0487           | 2.4255           |
| C           | 4.9454           | 1.6989           | 0.5498           | C            | 3.2017           | 4.1981           | 0.9467           |
| C           | 3.6813           | 0.8278           | 0.5594           | C            | 2.3023           | 3.3001           | 0.0868           |
| C           | 3.8938           | -0.5107          | -0.2296          | C            | 0.7808           | 3.6212           | 0.3088           |
| C           | 4.4323           | -0.2605          | -1.6885          | C            | 0.3864           | 3.5593           | 1.8322           |
| C           | 5.6254           | 0.7379           | -1.6737          | C            | 1.3986           | 4.3653           | 2.6964           |
| C           | 2.637            | -1.4145          | -0.2709          | C            | -0.1761          | 2.7333           | -0.5255          |
| C           | 1.5347           | -0.9648          | -1.2425          | C            | -0.3145          | 1.2878           | -0.0274          |
| C           | 2.0746           | -0.6398          | -2.6409          | C            | -0.6138          | 1.216            | 1.4769           |
| C           | 3.3025           | 0.2716           | -2.6067          | C            | 0.3182           | 2.0896           | 2.3193           |
| C           | 4.992            | -1.5684          | -2.3211          | C            | -0.9999          | 4.2179           | 2.0918           |
| C           | 3.2474           | 0.5928           | 1.9902           | C            | 2.7047           | 3.4261           | -1.3645          |
| O           | 3.7475           | -0.1893          | 2.7863           | O            | 2.4473           | 4.3629           | -2.1073          |
| O           | 4.9229           | -1.265           | 0.4558           | O            | 0.5471           | 4.9858           | -0.1172          |
| C           | 0.4024           | -1.9626          | -1.3257          | C            | -1.3299          | 0.5466           | -0.8638          |
| O           | -0.8685          | -1.4754          | -1.0127          | O            | -2.6707          | 0.6732           | -0.5063          |
| C           | 0.5018           | -3.2527          | -1.6429          | C            | -1.0438          | -0.2335          | -1.9042          |
| C           | -3.5354          | -1.0163          | -2.2376          | C            | -5.2659          | 1.6884           | -1.4689          |
| C           | -2.613           | -2.199           | -2.5049          | C            | -4.2048          | 1.0023           | -2.3217          |
| C           | -1.8046          | -2.5559          | -1.2513          | C            | -3.4446          | -0.0429          | -1.498           |
| C           | -2.7371          | -2.8841          | -0.0286          | C            | -4.4114          | -1.1314          | -0.9058          |
| C           | -3.789           | -1.7437          | 0.24             | C            | -5.5988          | -0.4911          | -0.0931          |
| C           | -4.4846          | -1.3066          | -1.0815          | C            | -6.2491          | 0.6778           | -0.8893          |
| C           | -1.9585          | -3.2148          | 1.2714           | C            | -3.6885          | -2.2038          | -0.0503          |
| C           | -1.3183          | -2.0049          | 1.9803           | C            | -3.243           | -1.7306          | 1.3443           |
| C           | -2.3566          | -0.8894          | 2.1957           | C            | -4.4115          | -1.0863          | 2.1089           |
| C           | -3.1093          | -0.5263          | 0.9125           | C            | -5.1085          | 0.0068           | 1.2911           |
| C           | -0.5923          | -2.4458          | 3.2439           | C            | -2.5315          | -2.8527          | 2.0817           |
| C           | 0.6922           | -3.1876          | 3.0585           | C            | -1.1147          | -3.1242          | 1.6878           |
| C           | -0.9586          | -2.2149          | 4.5153           | C            | -3.0258          | -3.6091          | 3.075            |
| O           | 1.1467           | -3.4543          | 1.9524           | O            | -0.5322          | -2.4803          | 0.8205           |

|   |         |         |         |   |         |         |         |
|---|---------|---------|---------|---|---------|---------|---------|
| C | -4.9383 | -2.2309 | 1.1708  | C | -6.7468 | -1.5169 | 0.1441  |
| C | -0.875  | -3.7075 | -1.5644 | C | -2.3578 | -0.6718 | -2.3418 |
| O | -1.2056 | -4.8741 | -1.7276 | O | -2.5251 | -1.4562 | -3.2659 |
| C | -3.287  | 4.3737  | -1.7405 | C | 4.0928  | -4.4227 | 1.147   |
| C | -2.1507 | 3.4272  | -1.4271 | C | 3.3249  | -3.1471 | 0.902   |
| C | -1.5766 | 3.317   | -0.2029 | C | 3.5088  | -2.3771 | -0.1984 |
| C | -2.055  | 4.1776  | 0.9837  | C | 4.4451  | -2.8091 | -1.3454 |
| C | -2.943  | 5.3667  | 0.525   | C | 5.1063  | -4.1971 | -1.1132 |
| C | -0.4445 | 2.3585  | 0.1398  | C | 2.8983  | -1.0009 | -0.413  |
| C | 0.7313  | 3.0256  | 0.8749  | C | 3.9948  | 0.0769  | -0.5626 |
| C | 0.2314  | 3.7741  | 2.1178  | C | 5.0025  | -0.3086 | -1.6623 |
| C | -0.8452 | 4.7897  | 1.7391  | C | 5.5506  | -1.7292 | -1.4739 |
| C | 1.8105  | 2.0057  | 1.1637  | C | 3.3787  | 1.4493  | -0.7407 |
| C | 2.114   | 1.4397  | 2.3303  | C | 3.4499  | 2.2541  | -1.7995 |
| O | 2.5852  | 1.6345  | 0.0624  | O | 2.6627  | 1.9245  | 0.3607  |
| C | -2.8778 | 3.29    | 1.9472  | C | 3.6658  | -2.9315 | -2.6786 |
| C | -1.7435 | 2.6022  | -2.6099 | C | 2.3782  | -2.8003 | 2.0086  |
| O | -2.2008 | 2.7872  | -3.733  | O | 2.1658  | -3.5481 | 2.9593  |
| O | -3.5085 | -4.0665 | -0.3556 | O | -5.0202 | -1.839  | -2.0154 |
| C | -3.975  | 4.9508  | -0.5103 | C | 5.3912  | -4.4794 | 0.3514  |
| H | 4.6269  | 2.6339  | -1.3748 | H | 3.1039  | 3.0357  | 2.7683  |
| H | 6.3015  | 2.6066  | -0.8511 | H | 3.4954  | 4.7288  | 3.0103  |
| H | 5.7618  | 1.199   | 1.086   | H | 3.099   | 5.2482  | 0.6459  |
| H | 4.7658  | 2.6482  | 1.0707  | H | 4.2581  | 3.9352  | 0.8066  |
| H | 6.5088  | 0.244   | -1.2461 | H | 1.2529  | 5.4399  | 2.5203  |
| H | 5.8999  | 1.009   | -2.7013 | H | 1.1924  | 4.204   | 3.7624  |
| H | 2.2149  | -1.4967 | 0.7369  | H | 0.1401  | 2.7343  | -1.5772 |
| H | 2.952   | -2.4394 | -0.5088 | H | -1.1677 | 3.2066  | -0.5562 |
| H | 1.1027  | -0.0451 | -0.8416 | H | 0.6397  | 0.7829  | -0.1857 |
| H | 2.3229  | -1.5611 | -3.1818 | H | -1.6519 | 1.505   | 1.6795  |
| H | 1.2892  | -0.1512 | -3.2327 | H | -0.5177 | 0.1789  | 1.8204  |
| H | 2.9866  | 1.2743  | -2.3033 | H | 1.311   | 1.6304  | 2.3328  |
| H | 3.6783  | 0.3856  | -3.6321 | H | -0.0258 | 2.0583  | 3.3616  |
| H | 4.2551  | -2.3755 | -2.3464 | H | -1.8038 | 3.7574  | 1.5114  |
| H | 5.317   | -1.3918 | -3.3534 | H | -1.2761 | 4.1354  | 3.1498  |
| H | 5.8626  | -1.9442 | -1.772  | H | -0.994  | 5.2856  | 1.8454  |
| H | 4.6248  | -1.4306 | 1.3749  | H | 0.8607  | 5.0834  | -1.0408 |
| H | 1.3549  | -3.8538 | -1.8922 | H | -0.1053 | -0.5007 | -2.3484 |
| H | -2.9478 | -0.1164 | -2.0281 | H | -4.7944 | 2.2626  | -0.6634 |
| H | -4.1194 | -0.8012 | -3.1401 | H | -5.8126 | 2.4119  | -2.0851 |
| H | -3.2019 | -3.0606 | -2.8435 | H | -4.6721 | 0.5402  | -3.2001 |
| H | -1.943  | -1.9328 | -3.3326 | H | -3.517  | 1.7697  | -2.6999 |
| H | -5.1742 | -2.0966 | -1.4091 | H | -6.831  | 0.2679  | -1.7263 |
| H | -5.1057 | -0.4196 | -0.9017 | H | -6.9696 | 1.2082  | -0.2534 |
| H | -2.6353 | -3.7226 | 1.9732  | H | -4.3477 | -3.0764 | 0.0604  |
| H | -1.2028 | -3.9789 | 1.0533  | H | -2.8331 | -2.6023 | -0.6101 |
| H | -0.5469 | -1.5731 | 1.3355  | H | -2.5028 | -0.9378 | 1.2293  |

|              |                  |                  |                  |              |                  |                  |                  |
|--------------|------------------|------------------|------------------|--------------|------------------|------------------|------------------|
| H            | -3.0859          | -1.1795          | 2.9603           | H            | -5.1516          | -1.8396          | 2.3998           |
| H            | -1.8551          | 0.0082           | 2.5786           | H            | -4.0411          | -0.6455          | 3.0434           |
| H            | -3.8623          | 0.2345           | 1.1548           | H            | -5.9584          | 0.3868           | 1.8731           |
| H            | -2.4172          | -0.0402          | 0.2206           | H            | -4.4271          | 0.8566           | 1.185            |
| H            | 1.2173           | -3.4868          | 3.9815           | H            | -0.6119          | -3.9447          | 2.2281           |
| H            | -0.3711          | -2.5583          | 5.3627           | H            | -2.4414          | -4.3851          | 3.5625           |
| H            | -1.869           | -1.6804          | 4.7653           | H            | -4.0402          | -3.4868          | 3.4398           |
| H            | -4.5752          | -2.6201          | 2.1255           | H            | -6.4076          | -2.4237          | 0.6515           |
| H            | -5.6297          | -1.4099          | 1.3956           | H            | -7.5398          | -1.0759          | 0.7599           |
| H            | -5.5293          | -3.0264          | 0.7032           | H            | -7.2115          | -1.8307          | -0.7974          |
| H            | -2.8903          | 5.1964           | -2.3495          | H            | 4.3538           | -4.5205          | 2.2077           |
| H            | -4.0518          | 3.8684           | -2.3433          | H            | 3.4547           | -5.2772          | 0.8898           |
| H            | -2.3191          | 6.1578           | 0.0867           | H            | 6.0348           | -4.2813          | -1.6918          |
| H            | -3.4498          | 5.82             | 1.3863           | H            | 4.4482           | -4.9953          | -1.4845          |
| H            | -0.8489          | 1.5504           | 0.7597           | H            | 2.2512           | -1.0181          | -1.2976          |
| H            | -0.042           | 1.878            | -0.7518          | H            | 2.2444           | -0.7107          | 0.4095           |
| H            | 1.1739           | 3.7758           | 0.2031           | H            | 4.5583           | 0.1114           | 0.3821           |
| H            | -0.1651          | 3.077            | 2.865            | H            | 4.5417           | -0.2283          | -2.6538          |
| H            | 1.0656           | 4.303            | 2.5959           | H            | 5.8439           | 0.3961           | -1.6566          |
| H            | -1.1896          | 5.2985           | 2.6487           | H            | 6.2104           | -1.9635          | -2.3191          |
| H            | -0.3737          | 5.5623           | 1.1161           | H            | 6.1848           | -1.7371          | -0.5774          |
| H            | 1.6805           | 1.5412           | 3.3062           | H            | 3.9225           | 2.1353           | -2.7554          |
| H            | -3.7331          | 2.8277           | 1.4429           | H            | 3.2236           | -1.9892          | -3.0129          |
| H            | -2.2856          | 2.4751           | 2.3738           | H            | 4.326            | -3.2757          | -3.4836          |
| H            | -3.2668          | 3.8779           | 2.7866           | H            | 2.8465           | -3.6548          | -2.5882          |
| H            | -1.0132          | 1.8017           | -2.4385          | H            | 1.8535           | -1.8399          | 1.9395           |
| H            | -2.891           | -4.7745          | -0.6386          | H            | -4.3082          | -2.1678          | -2.6039          |
| H            | -4.6685          | 4.2147           | -0.0882          | H            | 5.8455           | -5.4709          | 0.4593           |
| H            | -4.5815          | 5.8161           | -0.8022          | H            | 6.1121           | -3.7539          | 0.747            |
| <b>3a-11</b> | <b>X axis(Å)</b> | <b>Y axis(Å)</b> | <b>Z axis(Å)</b> | <b>3a-12</b> | <b>X axis(Å)</b> | <b>Y axis(Å)</b> | <b>Z axis(Å)</b> |
| C            | 5.7284           | 0.4258           | -1.1844          | C            | 5.5669           | -0.1795          | -1.5696          |
| C            | 5.3243           | 0.5203           | 0.2809           | C            | 5.3864           | 0.0662           | -0.077           |
| C            | 3.909            | -0.0343          | 0.5022           | C            | 3.9811           | -0.3518          | 0.3829           |
| C            | 3.7851           | -1.5219          | 0.0208           | C            | 3.6978           | -1.86            | 0.0701           |
| C            | 4.2697           | -1.6977          | -1.4684          | C            | 3.9482           | -2.2026          | -1.4465          |
| C            | 5.6481           | -1.0103          | -1.6866          | C            | 5.3188           | -1.6409          | -1.9224          |
| C            | 2.3682           | -2.1279          | 0.1958           | C            | 2.2902           | -2.3426          | 0.4988           |
| C            | 1.3211           | -1.6561          | -0.8273          | C            | 1.1245           | -1.8854          | -0.3978          |
| C            | 1.8311           | -1.7146          | -2.2745          | C            | 1.418            | -2.1106          | -1.8899          |
| C            | 3.2253           | -1.1162          | -2.4536          | C            | 2.8049           | -1.6372          | -2.3249          |
| C            | 4.4918           | -3.1964          | -1.8253          | C            | 4.0262           | -3.7392          | -1.6835          |
| C            | 3.5422           | 0.1288           | 1.9593           | C            | 3.8241           | -0.0281          | 1.8509           |
| O            | 3.9284           | -0.5762          | 2.8818           | O            | 4.2936           | -0.6644          | 2.7842           |
| O            | 4.6728           | -2.3311          | 0.832            | O            | 4.6451           | -2.6557          | 0.8262           |
| C            | 0.0143           | -2.4126          | -0.7346          | C            | -0.2009          | -2.5415          | -0.0608          |
| O            | -1.1467          | -1.6369          | -0.7808          | O            | -1.3341          | -1.9131          | -0.5893          |
| C            | -0.1403          | -3.7319          | -0.6325          | C            | -0.4062          | -3.6312          | 0.6777           |

|   |         |         |         |   |         |         |         |
|---|---------|---------|---------|---|---------|---------|---------|
| C | -3.3758 | -1.1357 | -2.6741 | C | -3.4567 | -2.4284 | -2.6046 |
| C | -2.7347 | -2.4859 | -2.3798 | C | -2.8633 | -3.4476 | -1.6401 |
| C | -2.259  | -2.5544 | -0.9231 | C | -2.4636 | -2.7782 | -0.32   |
| C | -3.4367 | -2.3101 | 0.0845  | C | -3.6794 | -2.0584 | 0.3647  |
| C | -4.223  | -0.9806 | -0.2248 | C | -4.4197 | -1.0697 | -0.615  |
| C | -4.5505 | -0.8671 | -1.7418 | C | -4.6723 | -1.7398 | -1.9963 |
| C | -2.9997 | -2.3436 | 1.5725  | C | -3.2972 | -1.3346 | 1.6823  |
| C | -2.2409 | -1.0953 | 2.0674  | C | -2.5495 | -0.0031 | 1.4996  |
| C | -3.0168 | 0.1844  | 1.7202  | C | -3.2907 | 0.9293  | 0.5298  |
| C | -3.4106 | 0.2519  | 0.2427  | C | -3.6049 | 0.2358  | -0.7976 |
| C | -1.8934 | -1.122  | 3.5499  | C | -2.2615 | 0.6241  | 2.8519  |
| C | -0.7827 | -0.2328 | 4.0038  | C | -0.9002 | 0.4256  | 3.4302  |
| C | -2.4532 | -1.8866 | 4.5022  | C | -3.125  | 1.3488  | 3.5822  |
| O | -0.1728 | 0.5109  | 3.2448  | O | 0.001   | -0.1525 | 2.834   |
| C | -5.6029 | -0.9488 | 0.4972  | C | -5.8303 | -0.6857 | -0.0771 |
| C | -1.5841 | -3.8847 | -0.6728 | C | -1.8454 | -3.805  | 0.6009  |
| O | -2.1443 | -4.9602 | -0.512  | O | -2.4465 | -4.6706 | 1.2227  |
| C | -1.9436 | 4.6818  | -2.319  | C | -1.4844 | 4.7718  | -2.4009 |
| C | -1.2672 | 3.4447  | -1.7807 | C | -0.9101 | 3.5031  | -1.8186 |
| C | -0.7636 | 3.3682  | -0.5248 | C | -0.3622 | 3.444   | -0.5803 |
| C | -0.9579 | 4.5059  | 0.5003  | C | -0.3964 | 4.65    | 0.3832  |
| C | -1.797  | 5.6933  | -0.051  | C | -1.1373 | 5.8847  | -0.2032 |
| C | 0.109   | 2.2349  | -0.0052 | C | 0.4115  | 2.256   | -0.0273 |
| C | 1.498   | 2.7561  | 0.4153  | C | 1.8637  | 2.6562  | 0.2965  |
| C | 1.3774  | 3.9124  | 1.4239  | C | 1.9083  | 3.8703  | 1.2417  |
| C | 0.4472  | 5.0191  | 0.9111  | C | 1.0703  | 5.0382  | 0.706   |
| C | 2.3748  | 1.6179  | 0.8843  | C | 2.6511  | 1.4633  | 0.7841  |
| C | 2.6493  | 1.2609  | 2.1379  | C | 3.0439  | 1.1871  | 2.0266  |
| O | 2.9715  | 0.8672  | -0.1319 | O | 3.0332  | 0.5634  | -0.2134 |
| C | -1.7183 | 3.9988  | 1.7499  | C | -1.1441 | 4.2936  | 1.692   |
| C | -1.1686 | 2.3343  | -2.779  | C | -0.9676 | 2.3372  | -2.7561 |
| O | -1.5889 | 2.4343  | -3.927  | O | -1.4489 | 2.4165  | -3.8816 |
| O | -4.3952 | -3.386  | -0.0799 | O | -4.657  | -3.0679 | 0.7215  |
| C | -1.5752 | 5.9347  | -1.5337 | C | -0.9593 | 6.0217  | -1.705  |
| H | 5.0961  | 1.0794  | -1.7956 | H | 4.8973  | 0.4693  | -2.1453 |
| H | 6.755   | 0.7927  | -1.3011 | H | 6.5878  | 0.0945  | -1.8607 |
| H | 6.0503  | -0.0205 | 0.9011  | H | 6.1545  | -0.4792 | 0.4856  |
| H | 5.3795  | 1.5738  | 0.5841  | H | 5.5572  | 1.1329  | 0.1174  |
| H | 6.4291  | -1.5876 | -1.173  | H | 6.1298  | -2.2325 | -1.4758 |
| H | 5.9115  | -1.0284 | -2.7521 | H | 5.4181  | -1.7652 | -3.0085 |
| H | 1.9984  | -1.9315 | 1.2109  | H | 2.0914  | -2.0438 | 1.5364  |
| H | 2.459   | -3.2216 | 0.1627  | H | 2.315   | -3.4394 | 0.5441  |
| H | 1.0929  | -0.6128 | -0.5969 | H | 0.9845  | -0.8127 | -0.2347 |
| H | 1.8377  | -2.7508 | -2.6355 | H | 1.3055  | -3.1737 | -2.1388 |
| H | 1.132   | -1.1791 | -2.9309 | H | 0.6674  | -1.586  | -2.4963 |
| H | 3.154   | -0.0286 | -2.3608 | H | 2.815   | -0.5434 | -2.334  |
| H | 3.5489  | -1.2951 | -3.4876 | H | 2.9589  | -1.9332 | -3.3711 |



|             |                  |                  |                  |             |                  |                  |                  |
|-------------|------------------|------------------|------------------|-------------|------------------|------------------|------------------|
| H           | 3.5961           | -3.8052          | -1.6763          | H           | 3.1253           | -4.2657          | -1.3577          |
| H           | 4.7868           | -3.3051          | -2.8759          | H           | 4.1629           | -3.9604          | -2.7488          |
| H           | 5.2898           | -3.6428          | -1.2214          | H           | 4.8727           | -4.1887          | -1.1525          |
| H           | 4.4755           | -2.1571          | 1.777            | H           | 4.5757           | -2.4027          | 1.7714           |
| H           | 0.5771           | -4.5283          | -0.581           | H           | 0.2712           | -4.2786          | 1.2              |
| H           | -2.6328          | -0.3363          | -2.5869          | H           | -2.7013          | -1.687           | -2.8884          |
| H           | -3.727           | -1.12            | -3.7125          | H           | -3.7544          | -2.9365          | -3.5294          |
| H           | -3.4479          | -3.2922          | -2.5925          | H           | -3.5843          | -4.2551          | -1.4614          |
| H           | -1.892           | -2.6241          | -3.0694          | H           | -1.9901          | -3.908           | -2.12            |
| H           | -5.3443          | -1.5824          | -1.9973          | H           | -5.4643          | -2.4947          | -1.8959          |
| H           | -4.9587          | 0.1276           | -1.9631          | H           | -5.0532          | -0.9968          | -2.7088          |
| H           | -3.902           | -2.4924          | 2.1801           | H           | -4.2126          | -1.1607          | 2.2656           |
| H           | -2.3987          | -3.2411          | 1.7674           | H           | -2.7088          | -2.006           | 2.3212           |
| H           | -1.285           | -1.066           | 1.5346           | H           | -1.5852          | -0.2056          | 1.027            |
| H           | -3.9113          | 0.2662           | 2.3497           | H           | -4.2197          | 1.3057           | 0.971            |
| H           | -2.4137          | 1.0673           | 1.9552           | H           | -2.678           | 1.8141           | 0.3286           |
| H           | -3.993           | 1.1682           | 0.0795           | H           | -4.1585          | 0.9376           | -1.435           |
| H           | -2.504           | 0.3731           | -0.3578          | H           | -2.6657          | 0.0407           | -1.3245          |
| H           | -0.5343          | -0.2794          | 5.0778           | H           | -0.7398          | 0.8454           | 4.4378           |
| H           | -2.1347          | -1.8545          | 5.5407           | H           | -2.8645          | 1.7758           | 4.5465           |
| H           | -3.2622          | -2.5772          | 4.2872           | H           | -4.1408          | 1.5288           | 3.2425           |
| H           | -5.5191          | -1.0762          | 1.5796           | H           | -5.7986          | -0.2638          | 0.9309           |
| H           | -6.1112          | 0.0066           | 0.3201           | H           | -6.3051          | 0.0576           | -0.7285          |
| H           | -6.2703          | -1.7375          | 0.132            | H           | -6.5004          | -1.5521          | -0.0408          |
| H           | -1.6611          | 4.8561           | -3.3641          | H           | -1.2329          | 4.8601           | -3.4646          |
| H           | -3.0299          | 4.5298           | -2.2979          | H           | -2.5783          | 4.7318           | -2.3284          |
| H           | -1.5765          | 6.6111           | 0.5084           | H           | -0.802           | 6.8043           | 0.2927           |
| H           | -2.8685          | 5.5003           | 0.0991           | H           | -2.2149          | 5.8098           | -3.00E-04        |
| H           | -0.3899          | 1.7404           | 0.8338           | H           | -0.0901          | 1.876            | 0.8676           |
| H           | 0.2543           | 1.454            | -0.7511          | H           | 0.4334           | 1.4146           | -0.7206          |
| H           | 1.9827           | 3.1762           | -0.4791          | H           | 2.3393           | 2.9782           | -0.6426          |
| H           | 1.0108           | 3.5509           | 2.3914           | H           | 1.5537           | 3.5978           | 2.2425           |
| H           | 2.369            | 4.343            | 1.6131           | H           | 2.9457           | 4.207            | 1.364            |
| H           | 0.3558           | 5.7873           | 1.6897           | H           | 1.0926           | 5.8514           | 1.4428           |
| H           | 0.931            | 5.5061           | 0.054            | H           | 1.5598           | 5.4276           | -0.1965          |
| H           | 2.3048           | 1.6497           | 3.0766           | H           | 2.8792           | 1.6947           | 2.9567           |
| H           | -1.1848          | 3.2149           | 2.2935           | H           | -0.6733          | 3.4828           | 2.2538           |
| H           | -1.8891          | 4.8172           | 2.4596           | H           | -1.188           | 5.1605           | 2.3621           |
| H           | -2.6975          | 3.5899           | 1.4734           | H           | -2.1751          | 3.9847           | 1.4837           |
| H           | -0.7177          | 1.3934           | -2.44            | H           | -0.5783          | 1.3786           | -2.3912          |
| H           | -3.9233          | -4.2425          | -0.0035          | H           | -4.209           | -3.7715          | 1.2378           |
| H           | -2.1924          | 6.775            | -1.8719          | H           | -1.5048          | 6.9005           | -2.0672          |
| H           | -0.5309          | 6.2098           | -1.7241          | H           | 0.0975           | 6.1789           | -1.9518          |
| <b>3b-1</b> | <b>X axis(Å)</b> | <b>Y axis(Å)</b> | <b>Z axis(Å)</b> | <b>3b-2</b> | <b>X axis(Å)</b> | <b>Y axis(Å)</b> | <b>Z axis(Å)</b> |
| C           | 4.2017           | -3.2755          | 0.8694           | C           | 5.1977           | 1.7467           | 0.7946           |
| C           | 3.8672           | -3.1801          | -0.6127          | C           | 4.8954           | 1.4378           | -0.6649          |
| C           | 2.3945           | -2.8102          | -0.824           | C           | 3.7291           | 0.4514           | -0.7929          |

|   |         |         |         |   |         |         |         |
|---|---------|---------|---------|---|---------|---------|---------|
| C | 1.4183  | -3.8207 | -0.1222 | C | 3.9806  | -0.8819 | -0.0035 |
| C | 1.787   | -4.054  | 1.3943  | C | 4.4173  | -0.6228 | 1.49    |
| C | 3.3134  | -4.2989 | 1.5651  | C | 5.5178  | 0.4734  | 1.5669  |
| C | -0.0767 | -3.423  | -0.2607 | C | 2.7697  | -1.8526 | -0.0522 |
| C | -0.5294 | -2.2763 | 0.6575  | C | 1.592   | -1.4795 | 0.8682  |
| C | -0.1416 | -2.5259 | 2.1203  | C | 2.0607  | -1.2259 | 2.3061  |
| C | 1.346   | -2.8485 | 2.2634  | C | 3.2022  | -0.2101 | 2.3585  |
| C | 1.0963  | -5.332  | 1.956   | C | 5.0534  | -1.8953 | 2.1239  |
| C | 2.123   | -2.7066 | -2.3072 | C | 3.4656  | 0.1956  | -2.2594 |
| O | 2.0228  | -3.6405 | -3.0911 | O | 4.1548  | -0.4783 | -3.0123 |
| O | 1.5651  | -5.1099 | -0.768  | O | 5.0935  | -1.5689 | -0.6265 |
| C | -1.9998 | -1.988  | 0.4689  | C | 0.4978  | -2.512  | 0.7414  |
| O | -2.288  | -0.9747 | -0.4461 | O | -0.377  | -2.3129 | -0.3297 |
| C | -3.0259 | -2.5266 | 1.1244  | C | 0.2481  | -3.5422 | 1.5475  |
| C | -3.7822 | -0.261  | -2.9019 | C | -1.2687 | -3.5648 | -2.8487 |
| C | -4.2497 | -1.2181 | -1.8121 | C | -0.9514 | -4.2981 | -1.5509 |
| C | -3.7198 | -0.7836 | -0.4425 | C | -1.2986 | -3.4268 | -0.3384 |
| C | -4.1596 | 0.6808  | -0.076  | C | -2.8115 | -3.0048 | -0.3357 |
| C | -3.7988 | 1.7116  | -1.2141 | C | -3.2464 | -2.338  | -1.6964 |
| C | -4.2245 | 1.1679  | -2.6087 | C | -2.7386 | -3.1678 | -2.9111 |
| C | -3.6071 | 1.1795  | 1.2887  | C | -3.1965 | -2.0946 | 0.8604  |
| C | -2.1102 | 1.5483  | 1.2859  | C | -2.7327 | -0.6305 | 0.7473  |
| C | -1.7752 | 2.5247  | 0.1519  | C | -3.1585 | -0.0196 | -0.5973 |
| C | -2.2823 | 2.0344  | -1.2067 | C | -2.7225 | -0.881  | -1.7859 |
| C | -1.5826 | 2.0765  | 2.6083  | C | -3.1787 | 0.1583  | 1.9672  |
| C | -0.173  | 1.7252  | 2.9585  | C | -2.3538 | 0.0037  | 3.2037  |
| C | -2.2585 | 2.8103  | 3.5068  | C | -4.217  | 1.0054  | 2.0505  |
| O | 0.5314  | 1.0265  | 2.2372  | O | -1.3747 | -0.7329 | 3.2496  |
| C | -4.5733 | 3.0514  | -1.0383 | C | -4.7971 | -2.3021 | -1.8421 |
| C | -4.1594 | -1.7751 | 0.6113  | C | -0.9198 | -4.151  | 0.934   |
| O | -5.2987 | -1.9195 | 1.0328  | O | -1.5033 | -5.1137 | 1.4134  |
| C | 2.7588  | 4.9543  | 1.2611  | C | -2.7749 | 4.6751  | 1.3736  |
| C | 2.8769  | 3.4657  | 1.029   | C | -1.4928 | 3.8965  | 1.1859  |
| C | 2.843   | 2.8904  | -0.1989 | C | -0.8261 | 3.8203  | 0.0074  |
| C | 2.6369  | 3.7367  | -1.471  | C | -1.3749 | 4.4935  | -1.2661 |
| C | 2.1902  | 5.191   | -1.1524 | C | -2.8405 | 4.9828  | -1.0964 |
| C | 2.9903  | 1.3962  | -0.4703 | C | 0.4928  | 3.0872  | -0.208  |
| C | 1.8365  | 0.8206  | -1.3175 | C | 0.4323  | 2.0625  | -1.3612 |
| C | 1.6836  | 1.6242  | -2.62   | C | -0.0597 | 2.7448  | -2.6493 |
| C | 1.5212  | 3.1173  | -2.3508 | C | -1.381  | 3.4798  | -2.4384 |
| C | 2.0138  | -0.6674 | -1.5502 | C | 1.7505  | 1.3351  | -1.5481 |
| C | 1.9592  | -1.3207 | -2.7098 | C | 2.2359  | 0.8403  | -2.6858 |
| O | 2.2101  | -1.4397 | -0.4021 | O | 2.5153  | 1.1313  | -0.3965 |
| C | 3.9637  | 3.7934  | -2.2638 | C | -0.4903 | 5.7106  | -1.6238 |
| C | 3.0454  | 2.6964  | 2.3033  | C | -1.0321 | 3.2318  | 2.4459  |
| O | 2.9245  | 3.2216  | 3.4072  | O | -1.7406 | 3.1612  | 3.4461  |
| O | -5.6044 | 0.6994  | 0.0369  | O | -3.6096 | -4.2081 | -0.2085 |

|   |         |         |         |   |         |         |         |
|---|---------|---------|---------|---|---------|---------|---------|
| C | 2.9666  | 5.7917  | 0.0066  | C | -3.0705 | 5.6549  | 0.2461  |
| H | 5.2513  | -3.5703 | 0.9848  | H | 6.055   | 2.4279  | 0.8499  |
| H | 4.1019  | -2.2942 | 1.3465  | H | 4.3543  | 2.2731  | 1.2552  |
| H | 4.5227  | -2.425  | -1.0655 | H | 4.6595  | 2.3808  | -1.1746 |
| H | 4.0988  | -4.1325 | -1.1061 | H | 5.7935  | 1.0352  | -1.1503 |
| H | 3.5715  | -4.3261 | 2.6316  | H | 5.7147  | 0.7339  | 2.6148  |
| H | 3.5716  | -5.2898 | 1.1669  | H | 6.4618  | 0.0724  | 1.1731  |
| H | -0.3013 | -3.1734 | -1.306  | H | 2.4168  | -1.954  | -1.087  |
| H | -0.698  | -4.3088 | -0.0668 | H | 3.1182  | -2.864  | 0.2015  |
| H | -0.013  | -1.3587 | 0.3606  | H | 1.1447  | -0.5422 | 0.5241  |
| H | -0.3714 | -1.6368 | 2.721   | H | 1.2268  | -0.8441 | 2.9062  |
| H | -0.7349 | -3.3399 | 2.5515  | H | 2.377   | -2.158  | 2.7873  |
| H | 1.5583  | -3.0521 | 3.3211  | H | 3.5135  | -0.0897 | 3.4044  |
| H | 1.9246  | -1.9527 | 2.016   | H | 2.8151  | 0.7677  | 2.054   |
| H | 1.4631  | -6.2405 | 1.465   | H | 5.9945  | -2.1664 | 1.6321  |
| H | 1.2998  | -5.4446 | 3.0275  | H | 5.2839  | -1.7284 | 3.1828  |
| H | 0.0105  | -5.3162 | 1.8298  | H | 4.3987  | -2.7689 | 2.0658  |
| H | 1.4653  | -4.9932 | -1.7363 | H | 4.919   | -1.6545 | -1.5873 |
| H | -3.0625 | -3.2821 | 1.8853  | H | 0.74    | -3.882  | 2.4381  |
| H | -2.6925 | -0.3074 | -3.0078 | H | -0.6315 | -2.6793 | -2.9524 |
| H | -4.1999 | -0.578  | -3.8647 | H | -1.0339 | -4.2162 | -3.6987 |
| H | -5.3457 | -1.2676 | -1.8052 | H | -1.4984 | -5.2484 | -1.5151 |
| H | -3.8915 | -2.2255 | -2.0607 | H | 0.1167  | -4.5511 | -1.5507 |
| H | -5.3194 | 1.1996  | -2.6931 | H | -3.3264 | -4.0926 | -2.9915 |
| H | -3.8423 | 1.8264  | -3.3995 | H | -2.918  | -2.6155 | -3.8427 |
| H | -4.2049 | 2.0454  | 1.6006  | H | -4.2887 | -2.1152 | 0.9839  |
| H | -3.8018 | 0.4318  | 2.0683  | H | -2.827  | -2.539  | 1.7931  |
| H | -1.562  | 0.6258  | 1.0914  | H | -1.639  | -0.5962 | 0.7489  |
| H | -0.6893 | 2.6658  | 0.0924  | H | -2.7201 | 0.9798  | -0.7001 |
| H | -2.1908 | 3.5163  | 0.3685  | H | -4.2437 | 0.1223  | -0.6395 |
| H | -2.0615 | 2.8038  | -1.958  | H | -3.0859 | -0.4092 | -2.7083 |
| H | -1.6941 | 1.1611  | -1.5056 | H | -1.6308 | -0.8585 | -1.8587 |
| H | 0.2046  | 2.1298  | 3.9133  | H | -2.6756 | 0.591   | 4.0806  |
| H | -1.8118 | 3.1466  | 4.4387  | H | -4.4482 | 1.5489  | 2.9637  |
| H | -3.2859 | 3.1168  | 3.3385  | H | -4.8775 | 1.1936  | 1.2114  |
| H | -4.3961 | 3.5191  | -0.0664 | H | -5.2904 | -1.8003 | -1.0056 |
| H | -4.2756 | 3.775   | -1.8066 | H | -5.0887 | -1.7744 | -2.758  |
| H | -5.6556 | 2.9103  | -1.1357 | H | -5.2221 | -3.3102 | -1.9059 |
| H | 1.7632  | 5.1616  | 1.6743  | H | -3.6054 | 3.9635  | 1.4588  |
| H | 3.4919  | 5.2852  | 2.0071  | H | -2.7423 | 5.2444  | 2.3107  |
| H | 1.1225  | 5.2123  | -0.893  | H | -3.5358 | 4.1355  | -1.1757 |
| H | 2.2997  | 5.8287  | -2.0386 | H | -3.1106 | 5.6733  | -1.9052 |
| H | 3.947   | 1.2266  | -0.9814 | H | 1.2792  | 3.8268  | -0.4065 |
| H | 3.0546  | 0.8187  | 0.4532  | H | 0.8121  | 2.5638  | 0.6946  |
| H | 0.9073  | 0.9369  | -0.7426 | H | -0.3032 | 1.2967  | -1.0786 |
| H | 2.5481  | 1.4622  | -3.2755 | H | 0.6986  | 3.4434  | -3.024  |
| H | 0.8018  | 1.2765  | -3.1734 | H | -0.2131 | 1.9985  | -3.4387 |

|             |                  |                  |                  |             |                  |                  |                  |
|-------------|------------------|------------------|------------------|-------------|------------------|------------------|------------------|
| H           | 1.4641           | 3.6465           | -3.311           | H           | -1.6565          | 3.9883           | -3.3715          |
| H           | 0.5472           | 3.2642           | -1.8674          | H           | -2.1572          | 2.7221           | -2.2668          |
| H           | 1.7923           | -0.9794          | -3.7132          | H           | 1.8441           | 0.8323           | -3.6846          |
| H           | 4.779            | 4.2044           | -1.6584          | H           | -0.4424          | 6.431            | -0.7997          |
| H           | 4.2898           | 2.8069           | -2.608           | H           | 0.5403           | 5.4269           | -1.8585          |
| H           | 3.862            | 4.4243           | -3.1544          | H           | -0.8833          | 6.2368           | -2.5015          |
| H           | 3.2779           | 1.6274           | 2.2206           | H           | -0.0279          | 2.79             | 2.4462           |
| H           | -5.8847          | -0.0201          | 0.641            | H           | -3.2982          | -4.7074          | 0.5764           |
| H           | 4.034            | 5.8517           | -0.2347          | H           | -2.4395          | 6.5456           | 0.3446           |
| H           | 2.6297           | 6.8184           | 0.1911           | H           | -4.1091          | 5.9973           | 0.3208           |
| <b>3b-3</b> | <b>X axis(Å)</b> | <b>Y axis(Å)</b> | <b>Z axis(Å)</b> | <b>3b-4</b> | <b>X axis(Å)</b> | <b>Y axis(Å)</b> | <b>Z axis(Å)</b> |
| C           | 2.391            | 4.8437           | -0.2829          | C           | 2.4428           | 5.0172           | -0.6471          |
| C           | 1.909            | 4.432            | 1.1016           | C           | 2.2089           | 4.486            | 0.7607           |
| C           | 0.7845           | 3.3929           | 1.0077           | C           | 1.4066           | 3.1785           | 0.7318           |
| C           | -0.4299          | 3.9102           | 0.1607           | C           | 0.0329           | 3.3466           | -0.0109          |
| C           | 0.0193           | 4.4489           | -1.2509          | C           | 0.193            | 4.0023           | -1.4354          |
| C           | 1.2451           | 5.3976           | -1.1201          | C           | 1.1229           | 5.2472           | -1.3725          |
| C           | -1.5602          | 2.8599           | 0.0019           | C           | -0.7718          | 2.0251           | -0.1136          |
| C           | -1.2704          | 1.7274           | -1               | C           | -0.2678          | 1.0346           | -1.1787          |
| C           | -0.7905          | 2.2761           | -2.3519          | C           | -0.0925          | 1.7046           | -2.5451          |
| C           | 0.3579           | 3.2746           | -2.2041          | C           | 0.7493           | 2.9776           | -2.4552          |
| C           | -1.0988          | 5.3054           | -1.9148          | C           | -1.1699          | 4.5271           | -1.9763          |
| C           | 0.3748           | 2.9834           | 2.4034           | C           | 1.2199           | 2.6851           | 2.152            |
| O           | -0.3008          | 3.642            | 3.1819           | O           | 0.4389           | 3.1336           | 2.9803           |
| O           | -1.0105          | 5.041            | 0.856            | O           | -0.7786          | 4.2689           | 0.759            |
| C           | -2.4699          | 0.8101           | -1.0975          | C           | -1.1356          | -0.1933          | -1.3099          |
| O           | -2.6959          | 0.0124           | 0.0276           | O           | -2.5109          | -0.0301          | -1.1617          |
| C           | -3.2882          | 0.6403           | -2.1344          | C           | -0.6848          | -1.4258          | -1.5352          |
| C           | -4.7065          | -0.573           | 2.1399           | C           | -5.0699          | -0.2811          | -2.617           |
| C           | -4.9985          | -0.2442          | 0.6814           | C           | -3.8726          | -1.2153          | -2.746           |
| C           | -3.8846          | -0.7683          | -0.231           | C           | -3.1212          | -1.3183          | -1.4141          |
| C           | -3.6687          | -2.316           | -0.0736          | C           | -4.0525          | -1.8299          | -0.2565          |
| C           | -3.4702          | -2.7408          | 1.4321           | C           | -5.3665          | -0.9704          | -0.1301          |
| C           | -4.5416          | -2.0743          | 2.3425           | C           | -6.0229          | -0.7516          | -1.5244          |
| C           | -2.5099          | -2.8688          | -0.9472          | C           | -3.3373          | -1.9294          | 1.1166           |
| C           | -1.0937          | -2.5698          | -0.4201          | C           | -3.0872          | -0.584           | 1.8192           |
| C           | -0.9397          | -2.9645          | 1.0552           | C           | -4.376           | 0.2513           | 1.9025           |
| C           | -2.0484          | -2.3722          | 1.9274           | C           | -5.0654          | 0.394            | 0.5419           |
| C           | -0.0349          | -3.2042          | -1.3043          | C           | -2.3826          | -0.804           | 3.1472           |
| C           | 0.8353           | -2.3049          | -2.1158          | C           | -0.9034          | -1.0136          | 3.1068           |
| C           | 0.1848           | -4.524           | -1.4249          | C           | -2.9459          | -0.8021          | 4.3664           |
| O           | 0.7955           | -1.0828          | -2.0294          | O           | -0.2512          | -1.0068          | 2.068            |
| C           | -3.662           | -4.2749          | 1.6205           | C           | -6.4455          | -1.7003          | 0.7237           |
| C           | -4.1911          | -0.3951          | -1.6634          | C           | -1.9082          | -2.2067          | -1.579           |
| O           | -5.0539          | -0.8984          | -2.3698          | O           | -1.9172          | -3.4221          | -1.7162          |
| C           | 5.0878           | -2.904           | -1.4778          | C           | 4.642            | -4.4778          | -0.1101          |
| C           | 4.3518           | -1.6164          | -1.1842          | C           | 3.6785           | -3.3503          | 0.1806           |

|   |         |         |         |   |         |         |         |
|---|---------|---------|---------|---|---------|---------|---------|
| C | 4.0454  | -1.1964 | 0.0682  | C | 3.9273  | -2.0542 | -0.1291 |
| C | 4.3765  | -2.0561 | 1.3035  | C | 5.2612  | -1.6193 | -0.7745 |
| C | 4.8132  | -3.4991 | 0.9248  | C | 6.3286  | -2.7482 | -0.7347 |
| C | 3.3566  | 0.1208  | 0.407   | C | 2.9689  | -0.8993 | 0.1178  |
| C | 2.0902  | -0.0646 | 1.2702  | C | 3.6213  | 0.2184  | 0.9454  |
| C | 2.4278  | -0.8756 | 2.5331  | C | 4.8807  | 0.7374  | 0.2418  |
| C | 3.1162  | -2.1965 | 2.1947  | C | 5.8648  | -0.406  | -0.0113 |
| C | 1.4259  | 1.2647  | 1.5735  | C | 2.6412  | 1.3246  | 1.2363  |
| C | 0.8821  | 1.6591  | 2.724   | C | 2.0969  | 1.5621  | 2.4275  |
| O | 1.3533  | 2.1627  | 0.5064  | O | 2.2561  | 2.1441  | 0.1745  |
| C | 5.5216  | -1.3916 | 2.1024  | C | 5.0086  | -1.234  | -2.2514 |
| C | 4.001   | -0.8575 | -2.4281 | C | 2.4162  | -3.8191 | 0.8384  |
| O | 4.1986  | -1.3187 | -3.5487 | O | 2.2766  | -4.9679 | 1.2461  |
| O | -4.8743 | -2.9858 | -0.5191 | O | -4.4833 | -3.1732 | -0.59   |
| C | 5.7635  | -3.5195 | -0.2598 | C | 5.7463  | -4.106  | -1.0918 |
| H | 3.1685  | 5.61    | -0.1822 | H | 2.9927  | 5.9639  | -0.5894 |
| H | 2.8593  | 3.9934  | -0.7912 | H | 3.0759  | 4.3259  | -1.2144 |
| H | 2.7647  | 4.026   | 1.6565  | H | 3.1861  | 4.3289  | 1.2354  |
| H | 1.5694  | 5.317   | 1.6544  | H | 1.6882  | 5.2434  | 1.3603  |
| H | 1.6264  | 5.6565  | -2.1163 | H | 1.3339  | 5.6091  | -2.3871 |
| H | 0.9267  | 6.3448  | -0.6634 | H | 0.6008  | 6.068   | -0.8621 |
| H | -1.8084 | 2.4354  | 0.9837  | H | -0.791  | 1.5339  | 0.8657  |
| H | -2.4843 | 3.3758  | -0.2956 | H | -1.8247 | 2.2728  | -0.3059 |
| H | -0.4606 | 1.1039  | -0.6091 | H | 0.7159  | 0.6812  | -0.8648 |
| H | -0.4563 | 1.4468  | -2.9886 | H | 0.3993  | 1.0104  | -3.2391 |
| H | -1.6151 | 2.7567  | -2.8908 | H | -1.0695 | 1.9294  | -2.9901 |
| H | 0.6104  | 3.6634  | -3.1994 | H | 0.8005  | 3.4324  | -3.4531 |
| H | 1.2499  | 2.7366  | -1.8686 | H | 1.7788  | 2.6987  | -2.208  |
| H | -1.3048 | 6.2169  | -1.3425 | H | -1.5636 | 5.3437  | -1.3607 |
| H | -0.7998 | 5.6212  | -2.9214 | H | -1.0585 | 4.9202  | -2.9939 |
| H | -2.045  | 4.7664  | -2.0104 | H | -1.939  | 3.7507  | -2.0093 |
| H | -1.2138 | 4.7727  | 1.7767  | H | -0.8325 | 3.9446  | 1.6826  |
| H | -3.3102 | 1.0955  | -3.1056 | H | 0.3122  | -1.7987 | -1.665  |
| H | -3.8096 | -0.0419 | 2.4778  | H | -4.7345 | 0.742   | -2.4127 |
| H | -5.5327 | -0.2128 | 2.764   | H | -5.6055 | -0.2457 | -3.573  |
| H | -5.9673 | -0.6699 | 0.3915  | H | -4.2058 | -2.2054 | -3.0812 |
| H | -5.0934 | 0.8452  | 0.586   | H | -3.213  | -0.8241 | -3.5313 |
| H | -5.5182 | -2.5431 | 2.1598  | H | -6.4758 | -1.6929 | -1.865  |
| H | -4.308  | -2.2663 | 3.3977  | H | -6.8488 | -0.0334 | -1.4404 |
| H | -2.6414 | -3.9547 | -1.0518 | H | -3.9282 | -2.5769 | 1.7798  |
| H | -2.6062 | -2.4976 | -1.9758 | H | -2.3934 | -2.4773 | 1.0009  |
| H | -0.9419 | -1.4895 | -0.4552 | H | -2.4015 | 0.0068  | 1.2115  |
| H | 0.0265  | -2.6109 | 1.4312  | H | -4.1405 | 1.2524  | 2.2859  |
| H | -0.9237 | -4.0539 | 1.1725  | H | -5.0837 | -0.1878 | 2.6137  |
| H | -1.9074 | -2.7268 | 2.9569  | H | -5.9992 | 0.9541  | 0.6831  |
| H | -1.9165 | -1.2865 | 1.9736  | H | -4.4452 | 1.0233  | -0.1038 |
| H | 1.5387  | -2.8067 | -2.8025 | H | -0.415  | -1.1762 | 4.0827  |

|             |                  |                  |                  |             |                  |                  |                  |
|-------------|------------------|------------------|------------------|-------------|------------------|------------------|------------------|
| H           | 0.9541           | -4.9338          | -2.0735          | H           | -2.3727          | -0.9547          | 5.2766           |
| H           | -0.4132          | -5.2456          | -0.8755          | H           | -4.0121          | -0.6551          | 4.505            |
| H           | -3.0025          | -4.8657          | 0.9794           | H           | -6.0873          | -1.9685          | 1.721            |
| H           | -3.4577          | -4.5673          | 2.6574           | H           | -7.3308          | -1.0666          | 0.8544           |
| H           | -4.689           | -4.5858          | 1.3983           | H           | -6.7839          | -2.626           | 0.2448           |
| H           | 4.3721           | -3.6235          | -1.8964          | H           | 5.0935           | -4.8002          | 0.837            |
| H           | 5.8604           | -2.7385          | -2.2386          | H           | 4.1063           | -5.3421          | -0.5218          |
| H           | 3.9352           | -4.1072          | 0.6663           | H           | 6.7672           | -2.8205          | 0.2701           |
| H           | 5.2834           | -3.9954          | 1.783            | H           | 7.1593           | -2.5144          | -1.4124          |
| H           | 4.0728           | 0.7659           | 0.9326           | H           | 2.6436           | -0.5115          | -0.8549          |
| H           | 3.0839           | 0.6766           | -0.4911          | H           | 2.0556           | -1.2108          | 0.6255           |
| H           | 1.3685           | -0.6447          | 0.6799           | H           | 3.9348           | -0.217           | 1.9061           |
| H           | 3.0651           | -0.2888          | 3.206            | H           | 4.6259           | 1.2254           | -0.7067          |
| H           | 1.5105           | -1.1021          | 3.0912           | H           | 5.3696           | 1.5              | 0.8611           |
| H           | 3.3731           | -2.7121          | 3.1291           | H           | 6.734            | -0.0147          | -0.5555          |
| H           | 2.3808           | -2.8351          | 1.6873           | H           | 6.2412           | -0.7392          | 0.9659           |
| H           | 0.7792           | 1.1648           | 3.6705           | H           | 2.214            | 1.0589           | 3.3674           |
| H           | 6.4163           | -1.253           | 1.4855           | H           | 4.5478           | -2.0557          | -2.8105          |
| H           | 5.2473           | -0.406           | 2.4908           | H           | 4.3454           | -0.3691          | -2.3522          |
| H           | 5.8056           | -2.0056          | 2.9649           | H           | 5.9471           | -0.9756          | -2.7554          |
| H           | 3.5403           | 0.1306           | -2.3072          | H           | 1.6055           | -3.0886          | 0.9531           |
| H           | -5.1099          | -2.6534          | -1.4112          | H           | -3.6907          | -3.7195          | -0.7771          |
| H           | 6.685            | -2.975           | -0.0239          | H           | 5.3539           | -4.0988          | -2.1151          |
| H           | 6.0584           | -4.5507          | -0.4861          | H           | 6.5326           | -4.8692          | -1.0643          |
| <b>3b-5</b> | <b>X axis(Å)</b> | <b>Y axis(Å)</b> | <b>Z axis(Å)</b> | <b>3b-6</b> | <b>X axis(Å)</b> | <b>Y axis(Å)</b> | <b>Z axis(Å)</b> |
| C           | 5.3856           | 0.9977           | 0.7753           | C           | -3.1338          | 4.7011           | -0.0668          |
| C           | 5.0071           | 0.7755           | -0.6823          | C           | -2.5117          | 4.1733           | -1.3554          |
| C           | 3.7123           | -0.0369          | -0.8006          | C           | -1.4637          | 3.0958           | -1.0478          |
| C           | 3.7999           | -1.4152          | -0.0551          | C           | -0.3267          | 3.6508           | -0.1224          |
| C           | 4.3048           | -1.2629          | 1.4314           | C           | -0.9043          | 4.2735           | 1.2              |
| C           | 5.5464           | -0.3293          | 1.5058           | C           | -2.0739          | 5.2506           | 0.8822           |
| C           | 2.4683           | -2.2118          | -0.0955          | C           | 0.7711           | 2.6147           | 0.2113           |
| C           | 1.3744           | -1.7107          | 0.8664           | C           | 0.3741           | 1.5149           | 1.2149           |
| C           | 1.9085           | -1.5649          | 2.2967           | C           | -0.2984          | 2.1136           | 2.4649           |
| C           | 3.1788           | -0.7152          | 2.3442           | C           | -1.3791          | 3.1552           | 2.1612           |
| C           | 4.7766           | -2.6285          | 2.013            | C           | 0.1612           | 5.1292           | 1.9451           |
| C           | 3.3761           | -0.2091          | -2.2645          | C           | -0.9193          | 2.5185           | -2.3364          |
| O           | 3.9386           | -0.9547          | -3.0542          | O           | -0.1269          | 3.0663           | -3.0903          |
| O           | 4.7934           | -2.2265          | -0.7286          | O           | 0.3361           | 4.7285           | -0.8283          |
| C           | 0.149            | -2.5845          | 0.7426           | C           | 1.577            | 0.6485           | 1.5514           |
| O           | -0.6871          | -2.2744          | -0.333           | O           | 2.4814           | 0.4248           | 0.5078           |
| C           | -0.2429          | -3.5642          | 1.555            | C           | 1.8811           | 0.0966           | 2.7256           |
| C           | -1.7519          | -3.4072          | -2.8429          | C           | 5.1889           | 1.5168           | -0.0968          |
| C           | -1.5388          | -4.1674          | -1.5394          | C           | 4.6952           | 1.0299           | 1.2588           |
| C           | -1.7572          | -3.2464          | -0.3338          | C           | 3.6853           | -0.1172          | 1.0974           |
| C           | -3.1944          | -2.6131          | -0.3331          | C           | 4.2972           | -1.3209          | 0.3044           |
| C           | -3.5339          | -1.9038          | -1.6998          | C           | 4.9228           | -0.8709          | -1.07            |

|   |         |         |         |   |         |         |         |
|---|---------|---------|---------|---|---------|---------|---------|
| C | -3.1513 | -2.8078 | -2.9074 | C | 5.8269  | 0.3816  | -0.887  |
| C | -3.4415 | -1.6458 | 0.855   | C | 3.3081  | -2.493  | 0.0801  |
| C | -2.7757 | -0.2634 | 0.7252  | C | 2.2309  | -2.2618 | -1.0008 |
| C | -3.1183 | 0.3887  | -0.6234 | C | 2.8495  | -1.7482 | -2.3109 |
| C | -2.8098 | -0.5362 | -1.8039 | C | 3.8081  | -0.5749 | -2.1035 |
| C | -3.0978 | 0.5923  | 1.9387  | C | 1.3633  | -3.4809 | -1.2837 |
| C | -2.283  | 0.3467  | 3.1673  | C | 0.029   | -3.2409 | -1.9077 |
| C | -4.0176 | 1.5668  | 2.022   | C | 1.6453  | -4.7638 | -1.0017 |
| O | -1.4093 | -0.5123 | 3.2125  | O | -0.4127 | -2.117  | -2.1201 |
| C | -5.0644 | -1.6507 | -1.844  | C | 5.8537  | -1.9689 | -1.6637 |
| C | -1.484  | -4.0079 | 0.9438  | C | 3.1732  | -0.519  | 2.4613  |
| O | -2.1971 | -4.8754 | 1.4296  | O | 3.7409  | -1.2472 | 3.2632  |
| C | -2.1727 | 4.9271  | 1.3507  | C | -4.0371 | -4.4945 | 1.0798  |
| C | -0.8889 | 4.1402  | 1.2342  | C | -3.1445 | -3.3125 | 0.792   |
| C | -0.1799 | 4.0519  | 0.082   | C | -3.601  | -2.0847 | 0.4461  |
| C | -0.5975 | 4.8196  | -1.1879 | C | -5.1116 | -1.7986 | 0.3234  |
| C | -1.8213 | 5.7518  | -0.9679 | C | -5.9606 | -3.1011 | 0.3145  |
| C | 1.012   | 3.1334  | -0.1461 | C | -2.7121 | -0.8859 | 0.1359  |
| C | 0.692   | 2.0751  | -1.2276 | C | -3.0546 | -0.2279 | -1.2133 |
| C | 0.1667  | 2.741   | -2.5174 | C | -4.5374 | 0.1603  | -1.2631 |
| C | -0.9483 | 3.7615  | -2.2631 | C | -5.4231 | -1.0559 | -1.0033 |
| C | 1.8697  | 1.1522  | -1.4751 | C | -2.1956 | 0.9803  | -1.4838 |
| C | 2.2476  | 0.6251  | -2.6388 | C | -1.4672 | 1.1925  | -2.5779 |
| O | 2.6158  | 0.7925  | -0.3495 | O | -2.1658 | 1.9589  | -0.4946 |
| C | 0.5445  | 5.7336  | -1.6948 | C | -5.554  | -0.9308 | 1.5254  |
| C | -0.5096 | 3.4274  | 2.4945  | C | -1.6924 | -3.6196 | 0.9513  |
| O | -1.2453 | 3.3856  | 3.4761  | O | -1.2562 | -4.766  | 0.9326  |
| O | -4.1559 | -3.6888 | -0.1932 | O | 5.3923  | -1.8562 | 1.0892  |
| C | -2.836  | 5.1728  | 0.0021  | C | -5.4869 | -4.1114 | 1.3471  |
| H | 6.3297  | 1.553   | 0.8231  | H | -3.8489 | 5.4959  | -0.3095 |
| H | 4.6346  | 1.621   | 1.2732  | H | -3.709  | 3.9101  | 0.4279  |
| H | 4.8916  | 1.7564  | -1.161  | H | -3.3145 | 3.7647  | -1.9825 |
| H | 5.8282  | 0.2672  | -1.2036 | H | -2.064  | 4.9997  | -1.9212 |
| H | 5.8021  | -0.1286 | 2.5542  | H | -2.5615 | 5.566   | 1.8137  |
| H | 6.4169  | -0.8435 | 1.0759  | H | -1.6689 | 6.1661  | 0.4293  |
| H | 2.0806  | -2.234  | -1.1225 | H | 1.127   | 2.1565  | -0.7209 |
| H | 2.6822  | -3.268  | 0.122   | H | 1.6572  | 3.1451  | 0.5887  |
| H | 1.0489  | -0.7126 | 0.5579  | H | -0.3438 | 0.8488  | 0.7292  |
| H | 1.149   | -1.0926 | 2.9305  | H | -0.7552 | 1.3094  | 3.0564  |
| H | 2.1072  | -2.5452 | 2.7438  | H | 0.4587  | 2.5709  | 3.1145  |
| H | 3.5288  | -0.6701 | 3.3838  | H | -1.707  | 3.5983  | 3.1111  |
| H | 2.9216  | 0.3148  | 2.0771  | H | -2.2626 | 2.6425  | 1.7707  |
| H | 5.6591  | -3.0101 | 1.4873  | H | 0.4859  | 5.9859  | 1.344   |
| H | 5.0542  | -2.5261 | 3.0689  | H | -0.2489 | 5.5309  | 2.8794  |
| H | 4.0075  | -3.4029 | 1.9511  | H | 1.0572  | 4.5593  | 2.2048  |
| H | 4.5809  | -2.2622 | -1.6849 | H | 0.6394  | 4.3876  | -1.6965 |
| H | 0.194   | -3.9618 | 2.4502  | H | 1.371   | 0.0999  | 3.6693  |

|             |                  |                  |                  |             |                  |                  |                  |
|-------------|------------------|------------------|------------------|-------------|------------------|------------------|------------------|
| H           | -0.9964          | -2.6212          | -2.9543          | H           | 4.3643           | 1.9616           | -0.665           |
| H           | -1.6127          | -4.0921          | -3.6877          | H           | 5.9273           | 2.3135           | 0.0516           |
| H           | -2.2145          | -5.0306          | -1.4954          | H           | 5.5467           | 0.7086           | 1.8719           |
| H           | -0.5171          | -4.5687          | -1.5378          | H           | 4.2393           | 1.8806           | 1.7817           |
| H           | -3.8637          | -3.6413          | -2.9784          | H           | 6.7502           | 0.092            | -0.3667          |
| H           | -3.2535          | -2.2443          | -3.8438          | H           | 6.1406           | 0.7641           | -1.8669          |
| H           | -4.5251          | -1.5105          | 0.9818           | H           | 3.9029           | -3.3801          | -0.1721          |
| H           | -3.1342          | -2.1284          | 1.7913           | H           | 2.823            | -2.7605          | 1.0279           |
| H           | -1.6883          | -0.3843          | 0.7209           | H           | 1.5581           | -1.487           | -0.6174          |
| H           | -2.5452          | 1.3157           | -0.7373          | H           | 2.0583           | -1.4246          | -2.999           |
| H           | -4.1731          | 0.6804           | -0.6642          | H           | 3.3723           | -2.564           | -2.8255          |
| H           | -3.1049          | -0.0268          | -2.7306          | H           | 4.2571           | -0.319           | -3.0723          |
| H           | -1.7257          | -0.6679          | -1.877           | H           | 3.2257           | 0.3053           | -1.8143          |
| H           | -2.5133          | 0.982            | 4.0395           | H           | -0.5584          | -4.1415          | -2.1563          |
| H           | -4.1657          | 2.1454           | 2.9308           | H           | 0.9491           | -5.5732          | -1.2081          |
| H           | -4.6601          | 1.8268           | 1.1882           | H           | 2.5766           | -5.0659          | -0.5351          |
| H           | -5.4801          | -1.0784          | -1.0106          | H           | 5.3449           | -2.9258          | -1.8059          |
| H           | -5.2808          | -1.094           | -2.7636          | H           | 6.243            | -1.6599          | -2.6412          |
| H           | -5.6274          | -2.5893          | -1.8996          | H           | 6.7202           | -2.1571          | -1.0199          |
| H           | -2.9003          | 4.4058           | 1.9823           | H           | -3.9939          | -5.1787          | 0.2227           |
| H           | -1.9535          | 5.8845           | 1.8398           | H           | -3.6687          | -5.0487          | 1.9519           |
| H           | -2.3115          | 5.9722           | -1.9246          | H           | -5.9109          | -3.5783          | -0.674           |
| H           | -1.4893          | 6.7205           | -0.5687          | H           | -7.0192          | -2.8689          | 0.4866           |
| H           | 1.8903           | 3.7248           | -0.4304          | H           | -2.818           | -0.1623          | 0.9544           |
| H           | 1.3084           | 2.6159           | 0.768            | H           | -1.6527          | -1.1492          | 0.1123           |
| H           | -0.114           | 1.4419           | -0.8307          | H           | -2.8765          | -0.9677          | -2.0066          |
| H           | 0.9905           | 3.2329           | -3.0495          | H           | -4.7598          | 0.9494           | -0.5344          |
| H           | -0.2242          | 1.9741           | -3.1985          | H           | -4.7835          | 0.5743           | -2.2493          |
| H           | -1.1915          | 4.2557           | -3.2127          | H           | -6.4746          | -0.7413          | -1.02            |
| H           | -1.8515          | 3.2138           | -1.9676          | H           | -5.2971          | -1.7458          | -1.8494          |
| H           | 1.84             | 0.7134           | -3.6274          | H           | -1.3154          | 0.5831           | -3.4482          |
| H           | 0.8528           | 6.443            | -0.9175          | H           | -5.3365          | -1.4214          | 2.4805           |
| H           | 1.4381           | 5.183            | -2.001           | H           | -5.0521          | 0.0417           | 1.5475           |
| H           | 0.2185           | 6.3154           | -2.5654          | H           | -6.632           | -0.7347          | 1.492            |
| H           | 0.4711           | 2.9354           | 2.5172           | H           | -1.0147          | -2.7655          | 1.0865           |
| H           | -3.9157          | -4.2218          | 0.5945           | H           | 5.0551           | -2.0763          | 1.9835           |
| H           | -3.6735          | 5.8688           | 0.1259           | H           | -5.5881          | -3.7026          | 2.359            |
| H           | -3.255           | 4.2388           | -0.3909          | H           | -6.1158          | -5.0084          | 1.3084           |
| <b>3b-7</b> | <b>X axis(Å)</b> | <b>Y axis(Å)</b> | <b>Z axis(Å)</b> | <b>3b-8</b> | <b>X axis(Å)</b> | <b>Y axis(Å)</b> | <b>Z axis(Å)</b> |
| C           | 2.3291           | 4.4843           | -0.6622          | C           | 2.4298           | 5.0047           | -0.5014          |
| C           | 2.0657           | 3.9916           | 0.756            | C           | 2.2094           | 4.4157           | 0.8854           |
| C           | 1.2158           | 2.7172           | 0.7401           | C           | 1.3979           | 3.1157           | 0.8104           |
| C           | -0.1488          | 2.9319           | -0.0054          | C           | 0.016            | 3.3248           | 0.0937           |
| C           | 0.0408           | 3.5414           | -1.4457          | C           | 0.163            | 4.0392           | -1.3038          |
| C           | 1.0259           | 4.7453           | -1.4094          | C           | 1.1029           | 5.2739           | -1.2002          |
| C           | -1.0113          | 1.6484           | -0.078           | C           | -0.8006          | 2.0149           | -0.0542          |
| C           | -0.5391          | 0.6008           | -1.0999          | C           | -0.3174          | 1.0666           | -1.1661          |



|   |         |         |         |   |         |         |         |
|---|---------|---------|---------|---|---------|---------|---------|
| C | -0.3433 | 1.2186  | -2.4881 | C | -0.1539 | 1.7924  | -2.5053 |
| C | 0.5467  | 2.4645  | -2.4408 | C | 0.6986  | 3.0547  | -2.373  |
| C | -1.2966 | 4.1136  | -2.0022 | C | -1.2027 | 4.596   | -1.8044 |
| C | 1.0054  | 2.2241  | 2.1557  | C | 1.2248  | 2.5621  | 2.2099  |
| O | 0.2874  | 2.7388  | 3.0026  | O | 0.4583  | 2.9804  | 3.0671  |
| O | -0.9164 | 3.9061  | 0.7451  | O | -0.7785 | 4.2195  | 0.9125  |
| C | -1.4611 | -0.5916 | -1.1618 | C | -1.1944 | -0.1498 | -1.338  |
| O | -2.8287 | -0.3414 | -1.2558 | O | -2.5647 | 0.0098  | -1.1458 |
| C | -1.0719 | -1.8633 | -1.0965 | C | -0.755  | -1.3708 | -1.6366 |
| C | -5.1474 | -0.7425 | -3.044  | C | -5.161  | -0.1579 | -2.5442 |
| C | -4.0157 | -1.736  | -2.8103 | C | -3.9722 | -1.0888 | -2.752  |
| C | -3.486  | -1.6258 | -1.3759 | C | -3.187  | -1.262  | -1.4473 |
| C | -4.6191 | -1.8754 | -0.3151 | C | -4.0904 | -1.829  | -0.2934 |
| C | -5.8709 | -0.9507 | -0.5583 | C | -5.3963 | -0.9722 | -0.0886 |
| C | -6.2881 | -0.963  | -2.0577 | C | -6.0876 | -0.6796 | -1.4521 |
| C | -4.1349 | -1.7539 | 1.1543  | C | -3.3404 | -2.0018 | 1.0535  |
| C | -3.8977 | -0.3153 | 1.6454  | C | -3.0648 | -0.6953 | 1.8172  |
| C | -5.1181 | 0.5783  | 1.3645  | C | -4.3465 | 0.1395  | 1.9773  |
| C | -5.5769 | 0.499   | -0.0947 | C | -5.0708 | 0.3547  | 0.6445  |
| C | -3.426  | -0.3121 | 3.0906  | C | -2.3266 | -0.9868 | 3.1128  |
| C | -1.9878 | -0.6363 | 3.3396  | C | -0.8502 | -1.2003 | 3.0219  |
| C | -4.1577 | -0.0119 | 4.1762  | C | -2.8576 | -1.0463 | 4.345   |
| O | -1.2014 | -0.9309 | 2.446   | O | -0.2255 | -1.1381 | 1.9681  |
| C | -7.1188 | -1.4628 | 0.2207  | C | -6.4564 | -1.7409 | 0.7547  |
| C | -2.33   | -2.5832 | -1.1859 | C | -1.9825 | -2.1448 | -1.688  |
| O | -2.4095 | -3.8012 | -1.1007 | O | -2.0002 | -3.3519 | -1.8854 |
| C | 7.1245  | -2.2464 | -1.5388 | C | 4.8891  | -4.3399 | -0.0626 |
| C | 6.2237  | -1.1082 | -1.1152 | C | 3.7845  | -3.3179 | 0.0572  |
| C | 5.4839  | -1.1171 | 0.0217  | C | 3.9262  | -2.0312 | -0.3433 |
| C | 5.4826  | -2.3388 | 0.9655  | C | 5.2016  | -1.5296 | -1.0541 |
| C | 6.1287  | -3.5913 | 0.3109  | C | 6.2332  | -2.661  | -1.3205 |
| C | 4.5982  | 0.0279  | 0.4994  | C | 2.9371  | -0.916  | -0.05   |
| C | 3.1584  | -0.4259 | 0.8063  | C | 3.5922  | 0.1341  | 0.866   |
| C | 3.1687  | -1.5701 | 1.8302  | C | 4.887   | 0.6853  | 0.2473  |
| C | 4.0277  | -2.7333 | 1.337   | C | 5.8491  | -0.4424 | -0.1532 |
| C | 2.3081  | 0.7571  | 1.2092  | C | 2.6247  | 1.2332  | 1.2179  |
| C | 1.757   | 1.0037  | 2.396   | C | 2.0948  | 1.4205  | 2.4244  |
| O | 2.0252  | 1.6571  | 0.1792  | O | 2.234   | 2.1017  | 0.198   |
| C | 6.276   | -1.9897 | 2.247   | C | 4.865   | -0.9285 | -2.4412 |
| C | 6.25    | 0.0382  | -2.0788 | C | 2.545   | -3.8455 | 0.7121  |
| O | 6.8703  | -0.0016 | -3.1364 | O | 2.4828  | -4.9693 | 1.1999  |
| O | -5.09   | -3.2374 | -0.4762 | O | -4.5366 | -3.1518 | -0.6841 |
| C | 7.4093  | -3.2561 | -0.4347 | C | 6.2653  | -3.7026 | -0.2151 |
| H | 2.9127  | 5.4114  | -0.6198 | H | 2.987   | 5.9446  | -0.4104 |
| H | 2.9415  | 3.7586  | -1.2092 | H | 3.0511  | 4.3342  | -1.1054 |
| H | 3.0323  | 3.8034  | 1.2409  | H | 3.191   | 4.2322  | 1.3409  |
| H | 1.571   | 4.7792  | 1.3378  | H | 1.7012  | 5.1501  | 1.5231  |

|   |         |         |         |   |         |           |         |
|---|---------|---------|---------|---|---------|-----------|---------|
| H | 1.2614  | 5.0671  | -2.432  | H | 1.3042  | 5.6767    | -2.2012 |
| H | 0.5352  | 5.6029  | -0.9289 | H | 0.5931  | 6.0761    | -0.6493 |
| H | -1.0704 | 1.1942  | 0.9162  | H | -0.8118 | 1.483     | 0.9038  |
| H | -2.0484 | 1.9377  | -0.2965 | H | -1.8537 | 2.2782    | -0.2228 |
| H | 0.4334  | 0.2176  | -0.7809 | H | 0.6673  | 0.6939    | -0.8794 |
| H | 0.1182  | 0.4827  | -3.1593 | H | 0.3242  | 1.1247    | -3.2341 |
| H | -1.3122 | 1.4673  | -2.9379 | H | -1.1346 | 2.0423    | -2.928  |
| H | 0.605   | 2.8883  | -3.4519 | H | 0.7403  | 3.5508    | -3.3514 |
| H | 1.568   | 2.1557  | -2.1959 | H | 1.729   | 2.7585    | -2.1513 |
| H | -1.6589 | 4.9557  | -1.4019 | H | -1.5826 | 5.3882    | -1.1496 |
| H | -1.1638 | 4.4852  | -3.0252 | H | -1.101  | 5.0315    | -2.8056 |
| H | -2.097  | 3.3693  | -2.0278 | H | -1.9778 | 3.8271    | -1.8607 |
| H | -0.9804 | 3.6055  | 1.6756  | H | -0.823  | 3.8567    | 1.8221  |
| H | -0.096  | -2.2962 | -0.9932 | H | 0.2369  | -1.7397   | -1.8098 |
| H | -4.7739 | 0.285   | -2.9686 | H | -4.8151 | 0.8522    | -2.2972 |
| H | -5.5259 | -0.8595 | -4.0663 | H | -5.7211 | -0.0719   | -3.4828 |
| H | -4.3648 | -2.7553 | -3.0177 | H | -4.3189 | -2.0593   | -3.1281 |
| H | -3.2173 | -1.5253 | -3.5335 | H | -3.3313 | -0.6607   | -3.5335 |
| H | -6.7503 | -1.9301 | -2.2989 | H | -6.5544 | -1.6004   | -1.8282 |
| H | -7.063  | -0.2064 | -2.2366 | H | -6.907  | 0.0367    | -1.3099 |
| H | -4.8676 | -2.2416 | 1.8128  | H | -3.9174 | -2.6801   | 1.6979  |
| H | -3.2285 | -2.3568 | 1.2918  | H | -2.4029 | -2.547    | 0.8851  |
| H | -3.0831 | 0.1204  | 1.067   | H | -2.392  | -0.0768   | 1.2227  |
| H | -4.8715 | 1.6216  | 1.6003  | H | -4.0958 | 1.1187    | 2.4052  |
| H | -5.9581 | 0.31    | 2.0142  | H | -5.0375 | -0.3328   | 2.6836  |
| H | -6.4772 | 1.1168  | -0.2095 | H | -5.9976 | 0.9101    | 0.839   |
| H | -4.8196 | 0.9703  | -0.7288 | H | -4.4646 | 1.0141    | 0.0158  |
| H | -1.662  | -0.5976 | 4.393   | H | -0.3373 | -1.4189   | 3.9741  |
| H | -3.7432 | -0.0155 | 5.1806  | H | -2.2613 | -1.2485   | 5.2305  |
| H | -5.2094 | 0.2459  | 4.1064  | H | -3.9189 | -0.9023   | 4.5194  |
| H | -6.939  | -1.5583 | 1.2946  | H | -6.0739 | -2.0611   | 1.7274  |
| H | -7.9649 | -0.7775 | 0.0913  | H | -7.3348 | -1.1115   | 0.9407  |
| H | -7.4461 | -2.4451 | -0.1382 | H | -6.8117 | -2.6397   | 0.2382  |
| H | 6.6532  | -2.7616 | -2.3858 | H | 4.9241  | -4.9834   | 0.8244  |
| H | 8.0883  | -1.861  | -1.8935 | H | 4.6786  | -4.9871   | -0.9232 |
| H | 5.4296  | -4.0498 | -0.4021 | H | 7.2368  | -2.239    | -1.4574 |
| H | 6.3346  | -4.3567 | 1.0696  | H | 5.9919  | -3.1771   | -2.2604 |
| H | 5.0505  | 0.4681  | 1.3978  | H | 2.6071  | -0.467    | -0.9926 |
| H | 4.5505  | 0.8438  | -0.2238 | H | 2.0253  | -1.2719   | 0.4311  |
| H | 2.7222  | -0.8253 | -0.1213 | H | 3.8751  | -0.3763   | 1.7994  |
| H | 3.5404  | -1.2227 | 2.8014  | H | 4.6632  | 1.3057    | -0.6289 |
| H | 2.1464  | -1.9327 | 1.9972  | H | 5.391   | 1.3442    | 0.9659  |
| H | 4.0359  | -3.5196 | 2.1029  | H | 6.7167  | -2.00E-04 | -0.6595 |
| H | 3.5283  | -3.1668 | 0.4592  | H | 6.2332  | -0.9035   | 0.7664  |
| H | 1.7831  | 0.457   | 3.3187  | H | 2.2184  | 0.8749    | 3.3395  |
| H | 7.3021  | -1.6826 | 2.0169  | H | 4.3424  | -1.66     | -3.0692 |
| H | 5.8207  | -1.1713 | 2.8133  | H | 4.2306  | -0.0395   | -2.3868 |

|             |                  |                  |                  |              |                  |                  |                  |
|-------------|------------------|------------------|------------------|--------------|------------------|------------------|------------------|
| H           | 6.3317           | -2.8524          | 2.9209           | H            | 5.7799           | -0.6317          | -2.9679          |
| H           | 5.6837           | 0.9372           | -1.8077          | H            | 1.6684           | -3.1849          | 0.7315           |
| H           | -4.3178          | -3.8408          | -0.4396          | H            | -3.7517          | -3.6905          | -0.9198          |
| H           | 8.1629           | -2.8579          | 0.2542           | H            | 7.0037           | -4.4768          | -0.4532          |
| H           | 7.8369           | -4.1659          | -0.8718          | H            | 6.5784           | -3.2461          | 0.7314           |
| <b>3b-9</b> | <b>X axis(Å)</b> | <b>Y axis(Å)</b> | <b>Z axis(Å)</b> | <b>3b-10</b> | <b>X axis(Å)</b> | <b>Y axis(Å)</b> | <b>Z axis(Å)</b> |
| C           | 3.3347           | 4.7228           | -0.0916          | C            | -3.095           | 4.7              | -0.1636          |
| C           | 2.8451           | 4.2025           | 1.253            | C            | -2.5015          | 4.1105           | -1.4389          |
| C           | 1.6563           | 3.2432           | 1.0754           | C            | -1.4573          | 3.0378           | -1.1034          |
| C           | 0.4676           | 3.929            | 0.3225           | C            | -0.2985          | 3.6221           | -0.2241          |
| C           | 0.9284           | 4.569            | -1.0401          | C            | -0.8462          | 4.307            | 1.0801           |
| C           | 2.2142           | 5.4231           | -0.8488          | C            | -2.013           | 5.2804           | 0.7411           |
| C           | -0.7477          | 2.9976           | 0.0941           | C            | 0.7964           | 2.5913           | 0.1347           |
| C           | -0.5971          | 1.9486           | -1.0255          | C            | 0.4081           | 1.5395           | 1.1917           |
| C           | -0.0382          | 2.5668           | -2.3195          | C            | -0.2366          | 2.1977           | 2.4265           |
| C           | 1.1775           | 3.4652           | -2.0977          | C            | -1.3129          | 3.2362           | 2.0976           |
| C           | -0.1413          | 5.5518           | -1.5998          | C            | 0.2402           | 5.1841           | 1.768            |
| C           | 1.2627           | 2.6963           | 2.4301           | C            | -0.9417          | 2.3996           | -2.375           |
| O           | 0.5741           | 3.2607           | 3.2681           | O            | -0.16            | 2.9074           | -3.1671          |
| O           | -0.0045          | 5.0232           | 1.1466           | O            | 0.3601           | 4.6618           | -0.9884          |
| C           | -1.9274          | 1.2443           | -1.2268          | C            | 1.6077           | 0.6757           | 1.5466           |
| O           | -2.4418          | 0.5946           | -0.0994          | O            | 2.5145           | 0.4297           | 0.5104           |
| C           | -2.6526          | 1.1736           | -2.3426          | C            | 1.9055           | 0.1436           | 2.7316           |
| C           | -4.7108          | 0.872            | 1.7967           | C            | 5.2315           | 1.49             | -0.1064          |
| C           | -4.7649          | 1.0936           | 0.2905           | C            | 4.731            | 1.0303           | 1.2563           |
| C           | -3.783           | 0.1633           | -0.4326          | C            | 3.7125           | -0.1113          | 1.1124           |
| C           | -4.0682          | -1.347           | -0.1186          | C            | 4.3161           | -1.3332          | 0.3413           |
| C           | -4.1352          | -1.6313          | 1.4295           | C            | 4.9469           | -0.9115          | -1.0397          |
| C           | -5.0234          | -0.5769          | 2.1508           | C            | 5.8612           | 0.3364           | -0.8763          |
| C           | -3.0686          | -2.3124          | -0.8055          | C            | 3.3185           | -2.5015          | 0.1352           |
| C           | -1.6737          | -2.3782          | -0.1592          | C            | 2.2444           | -2.2802          | -0.9506          |
| C           | -1.7724          | -2.6314          | 1.3538           | C            | 2.8673           | -1.7917          | -2.2683          |
| C           | -2.7137          | -1.6425          | 2.046            | C            | 3.8359           | -0.6234          | -2.0793          |
| C           | -0.8074          | -3.3707          | -0.9152          | C            | 1.3695           | -3.4979          | -1.2164          |
| C           | -0.0907          | -2.86            | -2.121           | C            | 0.0354           | -3.2586          | -1.8416          |
| C           | -0.6061          | -4.6616          | -0.6063          | C            | 1.6454           | -4.7789          | -0.9203          |
| O           | -0.1512          | -1.6907          | -2.4834          | O            | -0.4087          | -2.1348          | -2.0493          |
| C           | -4.8014          | -3.0072          | 1.7276           | C            | 5.8693           | -2.0268          | -1.6139          |
| C           | -3.8295          | 0.4376           | -1.9177          | C            | 3.1939           | -0.4854          | 2.4816           |
| O           | -4.7192          | 0.0986           | -2.6862          | O            | 3.7539           | -1.2041          | 3.2975           |
| C           | 3.6091           | -4.9463          | 0.1531           | C            | -4.2118          | -4.4685          | 0.8961           |
| C           | 2.8654           | -3.7211          | 0.6299           | C            | -3.2508          | -3.31            | 0.8098           |
| C           | 3.0789           | -2.474           | 0.1449           | C            | -3.6453          | -2.0269          | 0.6328           |
| C           | 4.2237           | -2.188           | -0.8494          | C            | -5.1339          | -1.6267          | 0.6485           |
| C           | 5.1758           | -3.405           | -1.0222          | C            | -6.0815          | -2.8223          | 0.9486           |
| C           | 2.2661           | -1.2351          | 0.5057           | C            | -2.7122          | -0.8746          | 0.2858           |
| C           | 3.1559           | -0.1208          | 1.0742           | C            | -3.0759          | -0.2763          | -1.0898          |

|   |         |         |         |   |         |         |         |
|---|---------|---------|---------|---|---------|---------|---------|
| C | 4.2886  | 0.2231  | 0.0904  | C | -4.5612 | 0.117   | -1.1628 |
| C | 5.0883  | -1.0179 | -0.305  | C | -5.4812 | -1.0334 | -0.7409 |
| C | 2.3461  | 1.0997  | 1.4347  | C | -2.2132 | 0.9112  | -1.4314 |
| C | 1.8413  | 1.3757  | 2.6357  | C | -1.5037 | 1.0687  | -2.5468 |
| O | 2.1408  | 2.0431  | 0.429   | O | -2.1587 | 1.933   | -0.4879 |
| C | 3.6439  | -1.8244 | -2.2357 | C | -5.408  | -0.5782 | 1.7545  |
| C | 1.875   | -4.0189 | 1.7091  | C | -1.8131 | -3.7009 | 0.8887  |
| O | 1.5611  | -5.1614 | 2.025   | O | -1.4259 | -4.8532 | 0.7265  |
| O | -5.3802 | -1.6743 | -0.6407 | O | 5.4059  | -1.8635 | 1.137   |
| C | 4.4157  | -4.7176 | -1.1189 | C | -5.5916 | -4.1282 | 0.3449  |
| H | 4.1578  | 5.4286  | 0.071   | H | -3.8075 | 5.4903  | -0.428  |
| H | 3.7454  | 3.9021  | -0.6902 | H | -3.6679 | 3.937   | 0.3756  |
| H | 3.6839  | 3.6972  | 1.7488  | H | -3.3193 | 3.6823  | -2.0327 |
| H | 2.5652  | 5.0447  | 1.8985  | H | -2.0574 | 4.9072  | -2.0485 |
| H | 2.5958  | 5.7502  | -1.8246 | H | -2.4805 | 5.6407  | 1.6666  |
| H | 1.9642  | 6.3412  | -0.2995 | H | -1.6084 | 6.1714  | 0.2413  |
| H | -1.0041 | 2.4967  | 1.0371  | H | 1.1313  | 2.0899  | -0.7828 |
| H | -1.6314 | 3.6187  | -0.1126 | H | 1.6935  | 3.1295  | 0.4732  |
| H | 0.1111  | 1.1806  | -0.6945 | H | -0.3239 | 0.8601  | 0.7473  |
| H | 0.24    | 1.7648  | -3.0159 | H | -0.6907 | 1.4244  | 3.0597  |
| H | -0.8109 | 3.1531  | -2.8308 | H | 0.5365  | 2.6742  | 3.0426  |
| H | 1.4472  | 3.9253  | -3.0577 | H | -1.6188 | 3.7232  | 3.0332  |
| H | 2.0341  | 2.84    | -1.83   | H | -2.2084 | 2.716   | 1.7462  |
| H | -0.2863 | 6.4123  | -0.937  | H | 0.5618  | 6.0102  | 1.1241  |
| H | 0.1678  | 5.9471  | -2.5748 | H | -0.1494 | 5.6304  | 2.6907  |
| H | -1.1195 | 5.083   | -1.735  | H | 1.1354  | 4.6172  | 2.0368  |
| H | -0.2413 | 4.666   | 2.0286  | H | 0.6443  | 4.2804  | -1.8461 |
| H | -2.4823 | 1.5564  | -3.3301 | H | 1.3915  | 0.1657  | 3.6729  |
| H | -3.7276 | 1.1561  | 2.1884  | H | 4.4117  | 1.9322  | -0.6836 |
| H | -5.44   | 1.5288  | 2.2853  | H | 5.9763  | 2.2829  | 0.0301  |
| H | -5.7877 | 0.9337  | -0.0731 | H | 5.5787  | 0.7129  | 1.8766  |
| H | -4.5217 | 2.1447  | 0.0885  | H | 4.2809  | 1.8934  | 1.7635  |
| H | -6.0783 | -0.758  | 1.9028  | H | 6.7812  | 0.048   | -0.3496 |
| H | -4.9441 | -0.7016 | 3.2385  | H | 6.1796  | 0.6997  | -1.862  |
| H | -3.506  | -3.3209 | -0.8219 | H | 3.9069  | -3.3971 | -0.1011 |
| H | -2.9781 | -2.0562 | -1.8689 | H | 2.8303  | -2.7495 | 1.0868  |
| H | -1.1839 | -1.4049 | -0.2569 | H | 1.5764  | -1.495  | -0.5802 |
| H | -0.7793 | -2.5397 | 1.8068  | H | 2.0784  | -1.4725 | -2.9611 |
| H | -2.1086 | -3.652  | 1.5643  | H | 3.3835  | -2.6196 | -2.7702 |
| H | -2.7705 | -1.9038 | 3.1108  | H | 4.288   | -0.3878 | -3.0518 |
| H | -2.2623 | -0.6458 | 2.0152  | H | 3.2607  | 0.2666  | -1.8059 |
| H | 0.5118  | -3.6004 | -2.674  | H | -0.55   | -4.1596 | -2.0938 |
| H | 0.039   | -5.312  | -1.1905 | H | 0.9434  | -5.5863 | -1.1163 |
| H | -1.079  | -5.1285 | 0.2525  | H | 2.5766  | -5.0813 | -0.4538 |
| H | -4.3045 | -3.8376 | 1.2192  | H | 5.3525  | -2.9815 | -1.7417 |
| H | -4.7817 | -3.2232 | 2.8025  | H | 6.2629  | -1.737  | -2.5955 |
| H | -5.8525 | -3.0245 | 1.4182  | H | 6.733   | -2.212  | -0.9655 |

|              |                  |                  |                  |   |         |         |         |
|--------------|------------------|------------------|------------------|---|---------|---------|---------|
| H            | 4.2833           | -5.2761          | 0.9541           | H | -3.8353 | -5.3309 | 0.3335  |
| H            | 2.9093           | -5.769           | -0.038           | H | -4.2954 | -4.779  | 1.945   |
| H            | 5.8663           | -3.4734          | -0.1702          | H | -7.095  | -2.6074 | 0.587   |
| H            | 5.8052           | -3.2769          | -1.9118          | H | -6.1731 | -2.9679 | 2.0341  |
| H            | 1.7471           | -0.8787          | -0.3928          | H | -2.765  | -0.1173 | 1.0768  |
| H            | 1.4648           | -1.4506          | 1.2158           | H | -1.6637 | -1.1785 | 0.2487  |
| H            | 3.6234           | -0.4996          | 1.9952           | H | -2.9099 | -1.0566 | -1.8464 |
| H            | 3.8893           | 0.6951           | -0.8157          | H | -4.7594 | 0.9963  | -0.5376 |
| H            | 4.9667           | 0.9562           | 0.5458           | H | -4.8154 | 0.4137  | -2.1887 |
| H            | 5.845            | -0.733           | -1.0473          | H | -6.5182 | -0.674  | -0.7497 |
| H            | 5.6417           | -1.352           | 0.5838           | H | -5.4215 | -1.8174 | -1.5072 |
| H            | 1.8589           | 0.8251           | 3.5561           | H | -1.3715 | 0.4193  | -3.391  |
| H            | 3.012            | -2.6268          | -2.6306          | H | -5.1241 | -0.965  | 2.7407  |
| H            | 3.033            | -0.9169          | -2.2152          | H | -4.8618 | 0.358   | 1.6095  |
| H            | 4.4466           | -1.6487          | -2.9614          | H | -6.4737 | -0.3229 | 1.792   |
| H            | 1.4453           | -3.1593          | 2.2384           | H | -1.0962 | -2.8981 | 1.1126  |
| H            | -5.4145          | -1.4135          | -1.5857          | H | 5.066   | -2.0641 | 2.0347  |
| H            | 3.7514           | -4.7145          | -1.9908          | H | -6.292  | -4.9365 | 0.5843  |
| H            | 5.1171           | -5.5475          | -1.2624          | H | -5.555  | -4.0539 | -0.7484 |
| <b>3b-11</b> | <b>X axis(Å)</b> | <b>Y axis(Å)</b> | <b>Z axis(Å)</b> |   |         |         |         |
| C            | 1.6862           | 5.0159           | -0.9717          |   |         |         |         |
| C            | 1.7585           | 4.3706           | 0.4076           |   |         |         |         |
| C            | 1.0591           | 3.0058           | 0.4057           |   |         |         |         |
| C            | -0.4423          | 3.1268           | -0.0372          |   |         |         |         |
| C            | -0.6059          | 3.8785           | -1.4111          |   |         |         |         |
| C            | 0.2422           | 5.1828           | -1.431           |   |         |         |         |
| C            | -1.1812          | 1.7683           | -0.0787          |   |         |         |         |
| C            | -0.833           | 0.8742           | -1.2784          |   |         |         |         |
| C            | -0.9639          | 1.6281           | -2.6058          |   |         |         |         |
| C            | -0.2048          | 2.9582           | -2.5925          |   |         |         |         |
| C            | -2.0772          | 4.3355           | -1.6396          |   |         |         |         |
| C            | 1.1871           | 2.3644           | 1.7701           |   |         |         |         |
| O            | 0.568            | 2.6745           | 2.7792           |   |         |         |         |
| O            | -1.1302          | 3.9387           | 0.9483           |   |         |         |         |
| C            | -1.6431          | -0.3989          | -1.3025          |   |         |         |         |
| O            | -3.0111          | -0.2944          | -1.0571          |   |         |         |         |
| C            | -1.1474          | -1.618           | -1.5048          |   |         |         |         |
| C            | -5.6502          | -0.7492          | -2.3118          |   |         |         |         |
| C            | -4.4159          | -1.6271          | -2.4791          |   |         |         |         |
| C            | -3.5699          | -1.6221          | -1.2006          |   |         |         |         |
| C            | -4.3915          | -2.1173          | 0.045            |   |         |         |         |
| C            | -5.7391          | -1.3205          | 0.22             |   |         |         |         |
| C            | -6.4996          | -1.2104          | -1.1334          |   |         |         |         |
| C            | -3.5816          | -2.107           | 1.369            |   |         |         |         |
| C            | -3.3587          | -0.7149          | 1.985            |   |         |         |         |
| C            | -4.6828          | 0.0574           | 2.1138           |   |         |         |         |
| C            | -5.4677          | 0.0916           | 0.799            |   |         |         |         |

|   |         |         |         |
|---|---------|---------|---------|
| C | -2.5549 | -0.8184 | 3.2709  |
| C | -1.0745 | -0.9806 | 3.1393  |
| C | -3.0298 | -0.7427 | 4.525   |
| O | -0.5015 | -1.0703 | 2.0588  |
| C | -6.7167 | -2.0573 | 1.1832  |
| C | -2.3274 | -2.4589 | -1.4112 |
| O | -2.2835 | -3.6797 | -1.4824 |
| C | 7.7141  | -2.3574 | -0.2534 |
| C | 6.7458  | -1.3973 | 0.4001  |
| C | 5.4133  | -1.3837 | 0.1467  |
| C | 4.7852  | -2.3493 | -0.8804 |
| C | 5.8543  | -3.0527 | -1.7618 |
| C | 4.3997  | -0.4663 | 0.8198  |
| C | 3.523   | 0.3088  | -0.187  |
| C | 2.8393  | -0.6659 | -1.1545 |
| C | 3.856   | -1.5705 | -1.847  |
| C | 2.5013  | 1.2226  | 0.4586  |
| C | 2.1631  | 1.2878  | 1.7454  |
| O | 1.855   | 2.1096  | -0.4086 |
| C | 3.9746  | -3.434  | -0.1319 |
| C | 7.4141  | -0.4769 | 1.3741  |
| O | 8.6293  | -0.4566 | 1.5391  |
| O | -4.7703 | -3.4973 | -0.1892 |
| C | 7.044   | -3.5347 | -0.9494 |
| H | 2.1696  | 5.9993  | -0.9361 |
| H | 2.2491  | 4.4211  | -1.6997 |
| H | 2.8156  | 4.2628  | 0.6823  |
| H | 1.3077  | 5.0357  | 1.1547  |
| H | 0.2381  | 5.6167  | -2.4392 |
| H | -0.2272 | 5.9322  | -0.7788 |
| H | -0.9927 | 1.2249  | 0.8526  |
| H | -2.263  | 1.9584  | -0.058  |
| H | 0.2114  | 0.5729  | -1.1798 |
| H | -0.5717 | 1.0091  | -3.4233 |
| H | -2.0201 | 1.8032  | -2.8443 |
| H | -0.3874 | 3.4722  | -3.5453 |
| H | 0.8694  | 2.7482  | -2.5769 |
| H | -2.3941 | 5.0722  | -0.8929 |
| H | -2.188  | 4.8094  | -2.6223 |
| H | -2.7896 | 3.5074  | -1.596  |
| H | -0.9864 | 3.5419  | 1.833   |
| H | -0.1436 | -1.9494 | -1.684  |
| H | -5.3576 | 0.2988  | -2.1816 |
| H | -6.2505 | -0.791  | -3.2282 |
| H | -4.7174 | -2.649  | -2.7408 |
| H | -3.8339 | -1.2452 | -3.3278 |
| H | -6.9216 | -2.1906 | -1.3946 |

|             |                  |                  |                  |             |                  |                  |                  |
|-------------|------------------|------------------|------------------|-------------|------------------|------------------|------------------|
| H           | -7.3565          | -0.5327          | -1.027           |             |                  |                  |                  |
| H           | -4.0906          | -2.7472          | 2.1035           |             |                  |                  |                  |
| H           | -2.6199          | -2.6121          | 1.2141           |             |                  |                  |                  |
| H           | -2.7488          | -0.1254          | 1.3009           |             |                  |                  |                  |
| H           | -4.4774          | 1.0886           | 2.4289           |             |                  |                  |                  |
| H           | -5.3168          | -0.3783          | 2.8934           |             |                  |                  |                  |
| H           | -6.4186          | 0.6111           | 0.9759           |             |                  |                  |                  |
| H           | -4.926           | 0.715            | 0.081            |             |                  |                  |                  |
| H           | -0.5097          | -1.0188          | 4.0864           |             |                  |                  |                  |
| H           | -2.3876          | -0.8088          | 5.3989           |             |                  |                  |                  |
| H           | -4.0876          | -0.6168          | 4.7315           |             |                  |                  |                  |
| H           | -6.2778          | -2.2534          | 2.1649           |             |                  |                  |                  |
| H           | -7.624           | -1.4629          | 1.3443           |             |                  |                  |                  |
| H           | -7.0362          | -3.0232          | 0.776            |             |                  |                  |                  |
| H           | 8.3128           | -1.7987          | -0.9843          |             |                  |                  |                  |
| H           | 8.4116           | -2.7639          | 0.4893           |             |                  |                  |                  |
| H           | 6.2253           | -2.3625          | -2.5321          |             |                  |                  |                  |
| H           | 5.4101           | -3.8989          | -2.301           |             |                  |                  |                  |
| H           | 3.7692           | -1.082           | 1.4741           |             |                  |                  |                  |
| H           | 4.8748           | 0.2644           | 1.4769           |             |                  |                  |                  |
| H           | 4.1949           | 0.9539           | -0.7723          |             |                  |                  |                  |
| H           | 2.0949           | -1.2712          | -0.6237          |             |                  |                  |                  |
| H           | 2.2959           | -0.1107          | -1.9288          |             |                  |                  |                  |
| H           | 3.3204           | -2.2721          | -2.4996          |             |                  |                  |                  |
| H           | 4.4631           | -0.939           | -2.5107          |             |                  |                  |                  |
| H           | 2.4876           | 0.7236           | 2.5979           |             |                  |                  |                  |
| H           | 4.5973           | -3.9828          | 0.583            |             |                  |                  |                  |
| H           | 3.1356           | -3.0168          | 0.4335           |             |                  |                  |                  |
| H           | 3.5544           | -4.1635          | -0.8339          |             |                  |                  |                  |
| H           | 6.7705           | 0.1982           | 1.9507           |             |                  |                  |                  |
| H           | -3.9639          | -4.0092          | -0.4113          |             |                  |                  |                  |
| H           | 6.7286           | -4.2796          | -0.2099          |             |                  |                  |                  |
| H           | 7.7677           | -4.0331          | -1.6047          |             |                  |                  |                  |
| <b>3c-1</b> | <b>X axis(Å)</b> | <b>Y axis(Å)</b> | <b>Z axis(Å)</b> | <b>3c-2</b> | <b>X axis(Å)</b> | <b>Y axis(Å)</b> | <b>Z axis(Å)</b> |
| C           | 5.4049           | 0.625            | -1.5761          | C           | -3.4328          | -3.8749          | 1.9801           |
| C           | 5.2581           | 0.6858           | -0.0617          | C           | -3.6352          | -3.9581          | 0.4714           |
| C           | 3.9604           | 0.0105           | 0.3973           | C           | -2.5658          | -3.1428          | -0.2665          |
| C           | 3.8617           | -1.4795          | -0.0851          | C           | -1.1177          | -3.6344          | 0.0881           |
| C           | 4.101            | -1.614           | -1.6378          | C           | -0.8679          | -3.6458          | 1.6424           |
| C           | 5.3612           | -0.8139          | -2.0755          | C           | -2.0413          | -4.3509          | 2.3828           |
| C           | 2.5322           | -2.178           | 0.3097           | C           | 0.0032           | -2.8405          | -0.6259          |
| C           | 1.2969           | -1.7589          | -0.5119          | C           | 0.2443           | -1.4263          | -0.0785          |
| C           | 1.5675           | -1.8265          | -2.0219          | C           | 0.4112           | -1.4198          | 1.4486           |
| C           | 2.8625           | -1.1244          | -2.4294          | C           | -0.6848          | -2.2023          | 2.1775           |
| C           | 4.3825           | -3.0894          | -2.0474          | C           | 0.4064           | -4.4603          | 2.0113           |
| C           | 3.8494           | 0.1329           | 1.8993           | C           | -2.8303          | -3.1807          | -1.7559          |
| O           | 4.5284           | -0.4635          | 2.7235           | O           | -2.6084          | -4.1218          | -2.5047          |

|   |         |         |         |   |         |         |         |
|---|---------|---------|---------|---|---------|---------|---------|
| O | 4.9263  | -2.2278 | 0.5511  | O | -0.9925 | -5.0072 | -0.3564 |
| C | 0.0382  | -2.5362 | -0.1949 | C | 1.4008  | -0.789  | -0.8121 |
| O | -1.1457 | -1.9466 | -0.6477 | O | 2.67    | -0.9126 | -0.2511 |
| C | -0.0764 | -3.6761 | 0.484   | C | 1.2973  | -0.1052 | -1.9501 |
| C | -3.3282 | -2.447  | -2.5907 | C | 5.3551  | -2.0481 | -0.7139 |
| C | -2.6545 | -3.4908 | -1.7086 | C | 4.4502  | -1.4328 | -1.7751 |
| C | -2.2189 | -2.8756 | -0.3736 | C | 3.6044  | -0.3051 | -1.1746 |
| C | -3.4273 | -2.2409 | 0.4021  | C | 4.4987  | 0.8217  | -0.5423 |
| C | -4.2437 | -1.2294 | -0.4899 | C | 5.5375  | 0.2457  | 0.4926  |
| C | -4.5368 | -1.8355 | -1.8927 | C | 6.2682  | -0.9993 | -0.0895 |
| C | -3.0148 | -1.5716 | 1.7394  | C | 3.6805  | 1.9734  | 0.0971  |
| C | -2.3204 | -0.2048 | 1.6026  | C | 3.029   | 1.6348  | 1.449   |
| C | -3.1289 | 0.7486  | 0.7087  | C | 4.0582  | 1.0559  | 2.4333  |
| C | -3.4802 | 0.1119  | -0.638  | C | 4.838   | -0.1166 | 1.8284  |
| C | -1.9944 | 0.3479  | 2.9803  | C | 2.2452  | 2.8291  | 1.9655  |
| C | -0.7135 | -0.1003 | 3.6022  | C | 0.8762  | 3.03    | 1.4004  |
| C | -2.7322 | 1.2131  | 3.6949  | C | 2.643   | 3.7132  | 2.8945  |
| O | 0.0981  | -0.8073 | 3.0164  | O | 0.3729  | 2.2635  | 0.586   |
| C | -5.6402 | -0.9242 | 0.1285  | C | 6.6631  | 1.2764  | 0.8043  |
| C | -1.5087 | -3.9205 | 0.4572  | C | 2.6757  | 0.258   | -2.2275 |
| O | -2.0387 | -4.8504 | 1.0502  | O | 3.0033  | 0.9435  | -3.1862 |
| C | -2.4834 | 4.0942  | -2.0848 | C | -3.1269 | 5.1473  | -0.4868 |
| C | -1.2366 | 3.2761  | -1.8375 | C | -2.6327 | 3.7425  | -0.7477 |
| C | -0.3514 | 3.5393  | -0.844  | C | -3.2414 | 2.6291  | -0.2686 |
| C | -0.5874 | 4.6867  | 0.1586  | C | -4.5211 | 2.7246  | 0.5879  |
| C | -2.0288 | 5.2615  | 0.0704  | C | -5.1721 | 4.1336  | 0.5202  |
| C | 0.9346  | 2.7639  | -0.5898 | C | -2.7449 | 1.2024  | -0.4761 |
| C | 1.0209  | 2.2237  | 0.8535  | C | -3.8434 | 0.2504  | -0.9886 |
| C | 0.8828  | 3.3834  | 1.8519  | C | -5.0751 | 0.2908  | -0.0762 |
| C | -0.4033 | 4.1734  | 1.6114  | C | -5.5891 | 1.7189  | 0.0832  |
| C | 2.2572  | 1.38    | 1.0877  | C | -3.3461 | -1.1684 | -1.1164 |
| C | 2.7892  | 1.0572  | 2.2657  | C | -3.3855 | -1.9164 | -2.2165 |
| O | 2.852   | 0.8244  | -0.0453 | O | -2.802  | -1.7457 | 0.0287  |
| C | 0.416   | 5.8284  | -0.1264 | C | -4.1639 | 2.417   | 2.0621  |
| C | -1.084  | 2.1479  | -2.8116 | C | -1.3773 | 3.7159  | -1.5653 |
| O | -1.947  | 1.8706  | -3.6384 | O | -0.8871 | 4.7327  | -2.0474 |
| O | -4.3491 | -3.3056 | 0.7459  | O | 5.2829  | 1.4192  | -1.6051 |
| C | -2.4922 | 5.4368  | -1.3658 | C | -4.1473 | 5.2487  | 0.6391  |
| H | 4.6217  | 1.2207  | -2.0581 | H | -3.5975 | -2.849  | 2.3288  |
| H | 6.36    | 1.0791  | -1.8653 | H | -4.1858 | -4.495  | 2.4806  |
| H | 6.1267  | 0.2119  | 0.4127  | H | -3.6133 | -5.0065 | 0.149   |
| H | 5.2711  | 1.7402  | 0.2431  | H | -4.6391 | -3.5805 | 0.2379  |
| H | 6.2627  | -1.3227 | -1.7074 | H | -1.9936 | -5.432  | 2.1929  |
| H | 5.442   | -0.8114 | -3.1702 | H | -1.9257 | -4.2303 | 3.4677  |
| H | 2.6795  | -3.2631 | 0.2244  | H | 0.9384  | -3.4161 | -0.5739 |
| H | 2.3342  | -2.0238 | 1.3783  | H | -0.2066 | -2.7924 | -1.7026 |
| H | 1.0608  | -0.721  | -0.2627 | H | -0.6319 | -0.8138 | -0.3027 |



|   |         |         |         |   |         |         |         |
|---|---------|---------|---------|---|---------|---------|---------|
| H | 1.5946  | -2.8718 | -2.3541 | H | 1.3885  | -1.8275 | 1.7329  |
| H | 0.7365  | -1.3626 | -2.5698 | H | 0.3981  | -0.3863 | 1.8149  |
| H | 2.7236  | -0.0449 | -2.3173 | H | -1.6191 | -1.6364 | 2.1169  |
| H | 3.0201  | -1.2846 | -3.5041 | H | -0.4369 | -2.2306 | 3.2469  |
| H | 3.5794  | -3.7709 | -1.7553 | H | 1.3082  | -4.0804 | 1.524   |
| H | 4.5011  | -3.1743 | -3.1343 | H | 0.5856  | -4.4307 | 3.0927  |
| H | 5.3067  | -3.4664 | -1.5953 | H | 0.3081  | -5.5153 | 1.7324  |
| H | 4.8813  | -2.0793 | 1.5192  | H | -1.222  | -5.0497 | -1.3085 |
| H | 0.6571  | -4.3016 | 0.9545  | H | 0.4435  | 0.1348  | -2.5527 |
| H | -2.6135 | -1.6645 | -2.8696 | H | 4.7548  | -2.5376 | 0.0612  |
| H | -3.6514 | -2.9185 | -3.5262 | H | 5.9676  | -2.8334 | -1.1724 |
| H | -3.3363 | -4.334  | -1.5414 | H | 5.0546  | -1.0616 | -2.6121 |
| H | -1.7879 | -3.8915 | -2.2503 | H | 3.8059  | -2.2237 | -2.1801 |
| H | -5.2973 | -2.6227 | -1.7979 | H | 6.9763  | -0.6758 | -0.8648 |
| H | -4.975  | -1.0706 | -2.5468 | H | 6.8744  | -1.4762 | 0.6914  |
| H | -3.9094 | -1.459  | 2.3684  | H | 2.9208  | 2.3238  | -0.6131 |
| H | -2.3813 | -2.2578 | 2.3161  | H | 4.3345  | 2.848   | 0.2223  |
| H | -1.365  | -0.3418 | 1.0886  | H | 2.2978  | 0.8391  | 1.301   |
| H | -2.5505 | 1.6626  | 0.5301  | H | 3.5455  | 0.7093  | 3.3397  |
| H | -4.052  | 1.0689  | 1.2027  | H | 4.7664  | 1.825   | 2.7597  |
| H | -4.085  | 0.8251  | -1.2131 | H | 5.5837  | -0.4523 | 2.5608  |
| H | -2.5604 | -0.0226 | -1.2149 | H | 4.1571  | -0.9637 | 1.6985  |
| H | -0.5248 | 0.2564  | 4.6289  | H | 0.3295  | 3.9167  | 1.7639  |
| H | -2.4304 | 1.5691  | 4.676   | H | 2.0186  | 4.5413  | 3.2183  |
| H | -3.6826 | 1.5903  | 3.3308  | H | 3.6203  | 3.6512  | 3.3621  |
| H | -5.5772 | -0.5514 | 1.1541  | H | 6.2749  | 2.2312  | 1.1682  |
| H | -6.1695 | -0.1675 | -0.4628 | H | 7.3441  | 0.8874  | 1.5707  |
| H | -6.2776 | -1.8153 | 0.1502  | H | 7.2708  | 1.4939  | -0.0813 |
| H | -2.6071 | 4.2897  | -3.1571 | H | -2.2891 | 5.8088  | -0.2345 |
| H | -3.3522 | 3.5057  | -1.7625 | H | -3.5724 | 5.5325  | -1.4131 |
| H | -2.7371 | 4.5906  | 0.5761  | H | -5.7042 | 4.2597  | -0.4328 |
| H | -2.0915 | 6.2218  | 0.5974  | H | -5.928  | 4.2442  | 1.3078  |
| H | 1.0402  | 1.9254  | -1.2789 | H | -1.9136 | 1.1486  | -1.1818 |
| H | 1.7916  | 3.4174  | -0.7977 | H | -2.3445 | 0.8418  | 0.4801  |
| H | 0.1644  | 1.5512  | 0.9939  | H | -4.1507 | 0.6019  | -1.9844 |
| H | 0.8577  | 3.0037  | 2.8806  | H | -5.8752 | -0.3291 | -0.501  |
| H | 1.7522  | 4.0489  | 1.7864  | H | -4.8473 | -0.1366 | 0.9079  |
| H | -1.245  | 3.5196  | 1.8777  | H | -5.972  | 2.0474  | -0.8931 |
| H | -0.4397 | 5.0159  | 2.3142  | H | -6.4506 | 1.7131  | 0.7633  |
| H | 2.4983  | 1.3039  | 3.268   | H | -3.7428 | -1.701  | -3.2051 |
| H | 0.238   | 6.682   | 0.5379  | H | -5.0441 | 2.517   | 2.7077  |
| H | 1.4555  | 5.5205  | 0.0236  | H | -3.7808 | 1.4008  | 2.1986  |
| H | 0.3357  | 6.1889  | -1.1577 | H | -3.3944 | 3.0974  | 2.443   |
| H | -0.1625 | 1.5559  | -2.7589 | H | -0.9004 | 2.7416  | -1.7263 |
| H | -3.8502 | -4.0173 | 1.2005  | H | 4.676   | 1.7032  | -2.3211 |
| H | -1.8493 | 6.151   | -1.8929 | H | -3.6412 | 5.2045  | 1.6102  |
| H | -3.505  | 5.8555  | -1.384  | H | -4.6474 | 6.2231  | 0.5934  |

| 3c-3 | X axis(Å) | Y axis(Å) | Z axis(Å) | 3c-4 | X axis(Å) | Y axis(Å) | Z axis(Å) |
|------|-----------|-----------|-----------|------|-----------|-----------|-----------|
| C    | 5.8014    | 1.4048    | -0.8226   | C    | 5.7       | 0.811     | -1.3189   |
| C    | 5.1993    | 1.5411    | 0.569     | C    | 5.342     | 1.1727    | 0.1163    |
| C    | 3.8737    | 0.7739    | 0.6807    | C    | 4.0157    | 0.5204    | 0.5385    |
| C    | 4.0391    | -0.7431   | 0.3245    | C    | 4.0616    | -1.0368   | 0.3905    |
| C    | 4.737     | -0.9428   | -1.0747   | C    | 4.5111    | -1.4761   | -1.0542   |
| C    | 6.0115    | -0.0588   | -1.1892   | C    | 5.7827    | -0.6992   | -1.5003   |
| C    | 2.715     | -1.5503   | 0.3815    | C    | 2.7391    | -1.7464   | 0.7748    |
| C    | 1.7559    | -1.3407   | -0.805    | C    | 1.5944    | -1.6366   | -0.2513   |
| C    | 2.4623    | -1.4134   | -2.1674   | C    | 2.0656    | -1.9471   | -1.682    |
| C    | 3.7575    | -0.6072   | -2.2268   | C    | 3.3663    | -1.2473   | -2.0711   |
| C    | 5.2278    | -2.4077   | -1.2641   | C    | 4.9076    | -2.9807   | -1.0992   |
| C    | 3.3092    | 0.9827    | 2.0676    | C    | 3.6818    | 0.9637    | 1.9453    |
| O    | 3.7002    | 0.4391    | 3.0915    | O    | 4.1817    | 0.5338    | 2.9754    |
| O    | 4.9228    | -1.3414   | 1.3046    | O    | 5.0727    | -1.5404   | 1.2987    |
| C    | 0.6017    | -2.3205   | -0.7934   | C    | 0.4061    | -2.5276   | 0.058     |
| O    | -0.6776   | -1.7714   | -0.9005   | O    | -0.7722   | -2.2122   | -0.6268   |
| C    | 0.689     | -3.648    | -0.7172   | C    | 0.358     | -3.5682   | 0.8888    |
| C    | -2.8576   | -1.6516   | -2.9119   | C    | -2.4471   | -3.3492   | -2.7884   |
| C    | -1.9925   | -2.8651   | -2.5963   | C    | -1.7775   | -4.134    | -1.6666   |
| C    | -1.5914   | -2.8754   | -1.1155   | C    | -1.7042   | -3.2928   | -0.3864   |
| C    | -2.8468   | -2.876    | -0.1743   | C    | -3.1257   | -2.8273   | 0.086     |
| C    | -3.8485   | -1.7085   | -0.5126   | C    | -3.927    | -2.1      | -1.0594   |
| C    | -4.1101   | -1.6254   | -2.0443   | C    | -3.8491   | -2.9045   | -2.3892   |
| C    | -2.4921   | -2.8609   | 1.3355    | C    | -3.0895   | -1.9521   | 1.3642    |
| C    | -1.9998   | -1.5062   | 1.8834    | C    | -2.6293   | -0.5009   | 1.1483    |
| C    | -2.9745   | -0.3806   | 1.5053    | C    | -3.4092   | 0.1753    | 0.0101    |
| C    | -3.3038   | -0.358    | 0.0111    | C    | -3.3943   | -0.6599   | -1.2728   |
| C    | -1.7301   | -1.4969   | 3.3822    | C    | -2.6834   | 0.2518    | 2.4655    |
| C    | -0.8289   | -0.4259   | 3.9034    | C    | -1.4192   | 0.3696    | 3.2483    |
| C    | -2.1869   | -2.3697   | 4.2956    | C    | -3.7726   | 0.8288    | 2.9985    |
| O    | -0.334    | 0.4339    | 3.1836    | O    | -0.331    | 0.0079    | 2.8153    |
| C    | -5.246    | -1.9453   | 0.1328    | C    | -5.4447   | -2.0064   | -0.7211   |
| C    | -0.6964   | -4.0638   | -0.8433   | C    | -0.991    | -4.0706   | 0.6954    |
| O    | -1.0546   | -5.2281   | -0.7315   | O    | -1.457    | -4.9985   | 1.3425    |
| C    | -3.7528   | 4.4643    | -0.3006   | C    | -3.1929   | 4.933     | -0.3279   |
| C    | -2.6318   | 3.6955    | 0.3608    | C    | -2.1376   | 4.0632    | 0.3135    |
| C    | -1.5329   | 3.2538    | -0.3001   | C    | -1.1103   | 3.4998    | -0.3684   |
| C    | -1.3076   | 3.5803    | -1.7898   | C    | -0.8748   | 3.8062    | -1.8614   |
| C    | -2.2913   | 4.6638    | -2.3119   | C    | -1.7597   | 4.9788    | -2.3691   |
| C    | -0.4254   | 2.4043    | 0.3097    | C    | -0.0949   | 2.5256    | 0.2163    |
| C    | 0.975     | 3.0098    | 0.1074    | C    | 1.3462    | 3.0185    | 0.0239    |
| C    | 1.2292    | 3.2794    | -1.3849   | C    | 1.6293    | 3.2776    | -1.4659   |
| C    | 0.1249    | 4.1431    | -1.9921   | C    | 0.6033    | 4.2353    | -2.0724   |
| C    | 2.0376    | 2.1306    | 0.7278    | C    | 2.3346    | 2.0578    | 0.6379    |
| C    | 2.2104    | 1.933     | 2.034     | C    | 2.6787    | 2.0171    | 1.9242    |
| O    | 2.8913    | 1.448     | -0.1368   | O    | 2.9512    | 1.1443    | -0.2149   |

|   |         |         |         |   |         |         |         |
|---|---------|---------|---------|---|---------|---------|---------|
| C | -1.4991 | 2.2979  | -2.6332 | C | -1.1923 | 2.5521  | -2.7095 |
| C | -2.8694 | 3.4664  | 1.8223  | C | -2.3386 | 3.8824  | 1.7839  |
| O | -3.8884 | 3.8428  | 2.3931  | O | -3.3375 | 4.2777  | 2.3753  |
| O | -3.5781 | -4.1065 | -0.4077 | O | -3.8947 | -4.0096 | 0.4215  |
| C | -3.7114 | 4.4331  | -1.823  | C | -3.1858 | 4.8872  | -1.8509 |
| H | 5.161   | 1.8964  | -1.5633 | H | 4.9679  | 1.2394  | -2.0125 |
| H | 6.7649  | 1.9271  | -0.8528 | H | 6.667   | 1.2596  | -1.575  |
| H | 5.9153  | 1.18    | 1.3182  | H | 6.1524  | 0.8654  | 0.7894  |
| H | 5.0463  | 2.6087  | 0.773   | H | 5.277   | 2.2661  | 0.1869  |
| H | 6.7947  | -0.4596 | -0.5312 | H | 6.6489  | -1.0572 | -0.9271 |
| H | 6.4161  | -0.1143 | -2.2081 | H | 6.0062  | -0.9181 | -2.5525 |
| H | 2.9703  | -2.6147 | 0.4715  | H | 2.9728  | -2.8034 | 0.9583  |
| H | 2.1842  | -1.335  | 1.3184  | H | 2.3889  | -1.384  | 1.7503  |
| H | 1.3228  | -0.3392 | -0.7115 | H | 1.2228  | -0.6063 | -0.2287 |
| H | 2.6808  | -2.4552 | -2.4331 | H | 2.1876  | -3.0303 | -1.8113 |
| H | 1.7837  | -1.0477 | -2.9497 | H | 1.2869  | -1.6524 | -2.3982 |
| H | 3.5072  | 0.4575  | -2.2399 | H | 3.1629  | -0.1813 | -2.2083 |
| H | 4.241   | -0.7995 | -3.1938 | H | 3.6712  | -1.6099 | -3.0617 |
| H | 4.4234  | -3.1408 | -1.1616 | H | 4.1013  | -3.6423 | -0.772  |
| H | 5.6668  | -2.5439 | -2.2597 | H | 5.1784  | -3.2797 | -2.1189 |
| H | 6.0013  | -2.6733 | -0.5348 | H | 5.7752  | -3.1901 | -0.4636 |
| H | 4.586   | -1.1271 | 2.2006  | H | 4.8709  | -1.2102 | 2.2001  |
| H | 1.5393  | -4.2973 | -0.6328 | H | 1.0987  | -4.0071 | 1.5287  |
| H | -2.2817 | -0.7302 | -2.7756 | H | -1.8371 | -2.4812 | -3.0628 |
| H | -3.1501 | -1.6802 | -3.9681 | H | -2.509  | -3.9793 | -3.6834 |
| H | -2.5301 | -3.785  | -2.8582 | H | -2.3244 | -5.0677 | -1.4858 |
| H | -1.103  | -2.8296 | -3.2383 | H | -0.7716 | -4.4202 | -1.9999 |
| H | -4.7422 | -2.4698 | -2.3517 | H | -4.4701 | -3.807  | -2.3057 |
| H | -4.6839 | -0.7191 | -2.2773 | H | -4.2819 | -2.3162 | -3.2086 |
| H | -3.3834 | -3.1825 | 1.8901  | H | -4.0908 | -1.9527 | 1.8179  |
| H | -1.7493 | -3.6387 | 1.5546  | H | -2.4622 | -2.4304 | 2.1278  |
| H | -1.0382 | -1.2945 | 1.4051  | H | -1.5858 | -0.5078 | 0.8222  |
| H | -2.5476 | 0.5903  | 1.7749  | H | -2.9706 | 1.1556  | -0.2038 |
| H | -3.8984 | -0.4684 | 2.0899  | H | -4.4471 | 0.3709  | 0.2994  |
| H | -4.037  | 0.4385  | -0.1718 | H | -4.0004 | -0.1452 | -2.0298 |
| H | -2.4082 | -0.0604 | -0.5416 | H | -2.3762 | -0.6716 | -1.6747 |
| H | -0.6287 | -0.4469 | 4.9882  | H | -1.5127 | 0.8287  | 4.2473  |
| H | -1.9349 | -2.2981 | 5.3503  | H | -3.7527 | 1.3676  | 3.9422  |
| H | -2.8424 | -3.193  | 4.0307  | H | -4.7388 | 0.7872  | 2.5045  |
| H | -5.1969 | -2.0717 | 1.2174  | H | -5.6358 | -1.5143 | 0.2361  |
| H | -5.9133 | -1.0982 | -0.0662 | H | -5.9801 | -1.4402 | -1.4926 |
| H | -5.7344 | -2.8382 | -0.2733 | H | -5.9111 | -2.9968 | -0.6711 |
| H | -4.7264 | 4.0686  | 0.0134  | H | -4.1928 | 4.6352  | 0.0106  |
| H | -3.7039 | 5.5066  | 0.04    | H | -3.0358 | 5.9677  | 0.0029  |
| H | -1.9726 | 5.6602  | -1.9759 | H | -1.3403 | 5.9409  | -2.0441 |
| H | -2.28   | 4.6952  | -3.4086 | H | -1.7673 | 5.0067  | -3.466  |
| H | -0.5769 | 2.245   | 1.3761  | H | -0.2625 | 2.3369  | 1.277   |

|             |                  |                  |                  |             |                  |                  |                  |
|-------------|------------------|------------------|------------------|-------------|------------------|------------------|------------------|
| H           | -0.4653          | 1.4025           | -0.1359          | H           | -0.2261          | 1.5474           | -0.2637          |
| H           | 1.0073           | 3.9789           | 0.6266           | H           | 1.449            | 3.9797           | 0.5491           |
| H           | 2.1916           | 3.7915           | -1.5122          | H           | 2.6328           | 3.7056           | -1.5855          |
| H           | 1.3031           | 2.3382           | -1.9434          | H           | 1.6242           | 2.3384           | -2.0325          |
| H           | 0.1957           | 5.1416           | -1.5385          | H           | 0.7667           | 5.2242           | -1.6218          |
| H           | 0.327            | 4.2781           | -3.0625          | H           | 0.8117           | 4.3492           | -3.144           |
| H           | 1.668            | 2.3083           | 2.8807           | H           | 2.3425           | 2.5911           | 2.7655           |
| H           | -1.3786          | 2.5099           | -3.7018          | H           | -1.0704          | 2.7616           | -3.7785          |
| H           | -0.7776          | 1.5145           | -2.381           | H           | -0.5382          | 1.7064           | -2.4763          |
| H           | -2.4965          | 1.8676           | -2.4917          | H           | -2.2215          | 2.2105           | -2.5549          |
| H           | -2.0827          | 2.9507           | 2.3863           | H           | -1.5325          | 3.388            | 2.3394           |
| H           | -2.962           | -4.8626          | -0.3049          | H           | -3.3811          | -4.5448          | 1.0635           |
| H           | -4.0941          | 3.4739           | -2.1902          | H           | -3.6641          | 3.9656           | -2.2019          |
| H           | -4.3758          | 5.2076           | -2.2234          | H           | -3.7819          | 5.7183           | -2.2451          |
| <b>3c-5</b> | <b>X axis(Å)</b> | <b>Y axis(Å)</b> | <b>Z axis(Å)</b> | <b>3c-6</b> | <b>X axis(Å)</b> | <b>Y axis(Å)</b> | <b>Z axis(Å)</b> |
| C           | 5.3915           | 0.2841           | -1.6008          | C           | 2.0679           | 5.0719           | 0.1197           |
| C           | 5.2368           | 0.4243           | -0.0928          | C           | 1.6224           | 4.4563           | -1.2012          |
| C           | 3.9117           | -0.1796          | 0.3894           | C           | 0.9173           | 3.1139           | -0.9668          |
| C           | 3.7591           | -1.6858          | -0.0226          | C           | -0.3233          | 3.2672           | -0.0197          |
| C           | 4.0054           | -1.9042          | -1.5649          | C           | 0.0457           | 3.9862           | 1.3306           |
| C           | 5.2987           | -1.1751          | -2.0287          | C           | 0.8878           | 5.2671           | 1.0642           |
| C           | 2.3999           | -2.3114          | 0.3924           | C           | -1.0493          | 1.9299           | 0.2653           |
| C           | 1.1902           | -1.8834          | -0.4616          | C           | -0.3401          | 0.9831           | 1.2493           |
| C           | 1.47             | -2.0375          | -1.9634          | C           | 0.0681           | 1.7163           | 2.5371           |
| C           | 2.7937           | -1.4056          | -2.3911          | C           | 0.8181           | 3.0229           | 2.2671           |
| C           | 4.2327           | -3.4073          | -1.9003          | C           | -1.2271          | 4.4751           | 2.0829           |
| C           | 3.8034           | 0.0199           | 1.8832           | C           | 0.541            | 2.501            | -2.2993          |
| O           | 4.4439           | -0.5746          | 2.7391           | O           | -0.3944          | 2.8365           | -3.0124          |
| O           | 4.7887           | -2.4435          | 0.6585           | O           | -1.2839          | 4.1245           | -0.6859          |
| C           | -0.1031          | -2.5897          | -0.1204          | C           | -1.1665          | -0.2671          | 1.4849           |
| O           | -1.2525          | -1.9818          | -0.6318          | O           | -1.4498          | -1.0208          | 0.3413           |
| C           | -0.2774          | -3.6779          | 0.6272           | C           | -1.6392          | -0.7309          | 2.641            |
| C           | -3.4432          | -2.4923          | -2.5575          | C           | -0.8787          | -3.6264          | -0.9041          |
| C           | -2.8322          | -3.5119          | -1.6041          | C           | -1.138           | -3.3884          | 0.5792           |
| C           | -2.3715          | -2.8362          | -0.3076          | C           | -2.1219          | -2.2287          | 0.775            |
| C           | -3.548           | -2.0899          | 0.4149           | C           | -3.4915          | -2.5112          | 0.057            |
| C           | -4.2986          | -1.0916          | -0.5469          | C           | -3.2981          | -2.8625          | -1.466           |
| C           | -4.6183          | -1.7689          | -1.9108          | C           | -2.1731          | -3.9219          | -1.6525          |
| C           | -3.1092          | -1.3625          | 1.7125           | C           | -4.5285          | -1.3714          | 0.2182           |
| C           | -2.3341          | -0.0502          | 1.4993           | C           | -4.2474          | -0.1154          | -0.6241          |
| C           | -3.0744          | 0.8897           | 0.5351           | C           | -4.0232          | -0.479           | -2.1024          |
| C           | -3.4579          | 0.192            | -0.7722          | C           | -2.9773          | -1.5846          | -2.2834          |
| C           | -1.9898          | 0.5683           | 2.8443           | C           | -5.3096          | 0.9437           | -0.3774          |
| C           | -0.7504          | 0.0764           | 3.5154           | C           | -5.2304          | 1.6838           | 0.9195           |
| C           | -2.6762          | 1.5255           | 3.4894           | C           | -6.2931          | 1.3155           | -1.2129          |
| O           | 0.0206           | -0.7171          | 2.9887           | O           | -4.3816          | 1.4432           | 1.7704           |
| C           | -5.6785          | -0.6675          | 0.0377           | C           | -4.5784          | -3.5118          | -2.0703          |

|   |         |         |         |   |         |         |         |
|---|---------|---------|---------|---|---------|---------|---------|
| C | -1.7192 | -3.8597 | 0.5942  | C | -2.3078 | -1.9614 | 2.2505  |
| O | -2.2985 | -4.7263 | 1.2351  | O | -2.9284 | -2.6649 | 3.0359  |
| C | -2.2858 | 4.2088  | -1.9764 | C | 5.4078  | -3.769  | 0.4087  |
| C | -0.985  | 3.4461  | -1.8877 | C | 4.226   | -2.8661 | 0.1395  |
| C | -0.033  | 3.7143  | -0.9605 | C | 4.3146  | -1.5163 | 0.0434  |
| C | -0.1711 | 4.8843  | 0.0327  | C | 5.674   | -0.794  | 0.1674  |
| C | -1.4282 | 5.76    | -0.2266 | C | 6.8748  | -1.7775 | 0.0897  |
| C | 1.196   | 2.8577  | -0.6951 | C | 3.1387  | -0.5721 | -0.1794 |
| C | 1.1123  | 2.2282  | 0.7151  | C | 3.3662  | 0.3787  | -1.3673 |
| C | 0.9031  | 3.317   | 1.7877  | C | 4.6721  | 1.1644  | -1.1933 |
| C | -0.2545 | 4.2673  | 1.4522  | C | 5.8547  | 0.2188  | -0.9955 |
| C | 2.2849  | 1.3138  | 1.0058  | C | 2.2067  | 1.3231  | -1.5543 |
| C | 2.8041  | 1.027   | 2.1988  | C | 1.4491  | 1.4185  | -2.6445 |
| O | 2.8356  | 0.6547  | -0.0946 | O | 1.9097  | 2.1733  | -0.4903 |
| C | 1.0382  | 5.8468  | -0.0559 | C | 5.7331  | -0.0528 | 1.5243  |
| C | -0.8838 | 2.3289  | -2.8799 | C | 2.9393  | -3.6182 | 0.0094  |
| O | -1.7925 | 2.0476  | -3.6543 | O | 2.8821  | -4.843  | 0.022   |
| O | -4.5297 | -3.079  | 0.8138  | O | -4.0822 | -3.6848 | 0.6693  |
| C | -2.6269 | 4.9513  | -0.6904 | C | 6.6444  | -3.0351 | 0.9105  |
| H | 4.6341  | 0.8836  | -2.1179 | H | 2.8331  | 4.4457  | 0.592   |
| H | 6.3646  | 0.6884  | -1.9037 | H | 2.5397  | 6.0423  | -0.0746 |
| H | 6.0842  | -0.0577 | 0.4111  | H | 0.9614  | 5.1522  | -1.7328 |
| H | 5.2878  | 1.4912  | 0.1602  | H | 2.5091  | 4.3227  | -1.8342 |
| H | 6.1772  | -1.6981 | -1.6266 | H | 0.2424  | 6.0438  | 0.6315  |
| H | 5.3887  | -1.2302 | -3.1213 | H | 1.2569  | 5.6767  | 2.0134  |
| H | 2.5034  | -3.4045 | 0.3616  | H | -2.0544 | 2.1537  | 0.6444  |
| H | 2.1996  | -2.0964 | 1.45    | H | -1.2366 | 1.4108  | -0.6831 |
| H | 0.9962  | -0.8251 | -0.2665 | H | 0.582   | 0.6264  | 0.7825  |
| H | 1.4598  | -3.0985 | -2.2427 | H | -0.8141 | 1.9299  | 3.1524  |
| H | 0.6623  | -1.5705 | -2.5427 | H | 0.7104  | 1.0648  | 3.1438  |
| H | 2.6954  | -0.3175 | -2.3306 | H | 1.8055  | 2.7837  | 1.8606  |
| H | 2.9538  | -1.6224 | -3.4555 | H | 1.013   | 3.5156  | 3.2288  |
| H | 3.4022  | -4.0428 | -1.5819 | H | -1.9353 | 3.668   | 2.2878  |
| H | 4.3548  | -3.5496 | -2.9808 | H | -0.9591 | 4.9256  | 3.046   |
| H | 5.1389  | -3.7968 | -1.423  | H | -1.7669 | 5.2391  | 1.5121  |
| H | 4.7395  | -2.2494 | 1.6183  | H | -1.484  | 3.7422  | -1.566  |
| H | 0.4212  | -4.3011 | 1.1509  | H | -1.5789 | -0.3454 | 3.6403  |
| H | -2.6845 | -1.771  | -2.8814 | H | -0.3753 | -2.7596 | -1.3469 |
| H | -3.7886 | -3.0053 | -3.4627 | H | -0.1935 | -4.4743 | -1.0199 |
| H | -3.5597 | -4.3047 | -1.3895 | H | -1.52   | -4.3057 | 1.0441  |
| H | -1.9854 | -3.9926 | -2.1108 | H | -0.1807 | -3.1672 | 1.0678  |
| H | -5.4234 | -2.5036 | -1.7728 | H | -2.5352 | -4.9007 | -1.309  |
| H | -5.0082 | -1.0239 | -2.6164 | H | -1.9463 | -4.0428 | -2.7197 |
| H | -4.0013 | -1.1583 | 2.3218  | H | -5.527  | -1.7561 | -0.0333 |
| H | -2.523  | -2.0468 | 2.3394  | H | -4.6185 | -1.1117 | 1.28    |
| H | -1.3825 | -0.2738 | 1.0096  | H | -3.3098 | 0.3283  | -0.2882 |
| H | -3.9782 | 1.3008  | 0.9966  | H | -3.6936 | 0.4108  | -2.6541 |

|             |                  |                  |                  |             |                  |                  |                  |
|-------------|------------------|------------------|------------------|-------------|------------------|------------------|------------------|
| H           | -2.4356          | 1.7496           | 0.3034           | H           | -4.9604          | -0.7986          | -2.571           |
| H           | -4.0192          | 0.9023           | -1.3934          | H           | -2.9149          | -1.8315          | -3.3514          |
| H           | -2.5458          | -0.0281          | -1.3353          | H           | -1.9925          | -1.1853          | -2.0217          |
| H           | -0.5525          | 0.4834           | 4.5215           | H           | -5.9897          | 2.4689           | 1.0746           |
| H           | -2.3632          | 1.9233           | 4.4508           | H           | -7.0058          | 2.0969           | -0.964           |
| H           | -3.5938          | 1.9416           | 3.0858           | H           | -6.4302          | 0.8486           | -2.1826          |
| H           | -5.5993          | -0.23            | 1.0363           | H           | -5.4663          | -2.8843          | -1.9589          |
| H           | -6.1614          | 0.076            | -0.6076          | H           | -4.4472          | -3.7027          | -3.1421          |
| H           | -6.3654          | -1.518           | 0.1137           | H           | -4.8052          | -4.4753          | -1.6             |
| H           | -2.221           | 4.9179           | -2.8111          | H           | 5.1471           | -4.5301          | 1.1544           |
| H           | -3.1209          | 3.5316           | -2.192           | H           | 5.6546           | -4.3001          | -0.5197          |
| H           | -1.6933          | 6.3245           | 0.6762           | H           | 7.0517           | -2.0787          | -0.9521          |
| H           | -1.2104          | 6.5104           | -0.9996          | H           | 7.7962           | -1.2841          | 0.4238           |
| H           | 1.3038           | 2.0605           | -1.432           | H           | 2.1988           | -1.0999          | -0.3522          |
| H           | 2.1066           | 3.4588           | -0.7995          | H           | 2.9825           | 0.0013           | 0.7433           |
| H           | 0.2214           | 1.5852           | 0.7216           | H           | 3.4623           | -0.2358          | -2.2744          |
| H           | 0.6884           | 2.8532           | 2.7585           | H           | 4.8564           | 1.7844           | -2.08            |
| H           | 1.8258           | 3.8948           | 1.9216           | H           | 4.6025           | 1.856            | -0.3448          |
| H           | -1.1929          | 3.7085           | 1.5601           | H           | 6.0055           | -0.3265          | -1.9376          |
| H           | -0.2848          | 5.0624           | 2.2081           | H           | 6.7638           | 0.8135           | -0.8378          |
| H           | 2.5416           | 1.353            | 3.1862           | H           | 1.4721           | 0.8784           | -3.5712          |
| H           | 0.8992           | 6.7068           | 0.6102           | H           | 6.7056           | 0.4334           | 1.6634           |
| H           | 1.986            | 5.3808           | 0.2269           | H           | 4.9712           | 0.7282           | 1.6104           |
| H           | 1.1587           | 6.2319           | -1.0755          | H           | 5.5816           | -0.7374          | 2.366            |
| H           | 0.0538           | 1.7601           | -2.9025          | H           | 2.0244           | -3.0268          | -0.1049          |
| H           | -4.0739          | -3.7872          | 1.3164           | H           | -4.129           | -3.5391          | 1.6381           |
| H           | -3.4803          | 5.6162           | -0.8664          | H           | 6.53             | -2.7864          | 1.9717           |
| H           | -2.9347          | 4.2428           | 0.0873           | H           | 7.5168           | -3.6949          | 0.8373           |
| <b>3c-7</b> | <b>X axis(Å)</b> | <b>Y axis(Å)</b> | <b>Z axis(Å)</b> | <b>3c-8</b> | <b>X axis(Å)</b> | <b>Y axis(Å)</b> | <b>Z axis(Å)</b> |
| C           | 2.9038           | 3.7723           | 2.4549           | C           | 2.0743           | 5.002            | 0.3869           |
| C           | 3.1621           | 4.0548           | 0.9809           | C           | 1.4998           | 4.4882           | -0.9277          |
| C           | 2.1763           | 3.2925           | 0.0882           | C           | 0.7986           | 3.1377           | -0.729           |
| C           | 0.6809           | 3.6189           | 0.4387           | C           | -0.344           | 3.2263           | 0.3401           |
| C           | 0.381            | 3.4249           | 1.974            | C           | 0.1561           | 3.8484           | 1.6988           |
| C           | 1.4706           | 4.1186           | 2.8407           | C           | 0.9887           | 5.1384           | 1.4472           |
| C           | -0.3421          | 2.816            | -0.4078          | C           | -1.0442          | 1.872            | 0.5995           |
| C           | -0.4844          | 1.3325           | -0.0242          | C           | -0.2828          | 0.8622           | 1.4704           |
| C           | -0.7108          | 1.1479           | 1.4829           | C           | 0.2435           | 1.5089           | 2.7597           |
| C           | 0.2984           | 1.9197           | 2.3341           | C           | 0.9929           | 2.8184           | 2.5009           |
| C           | -0.9648          | 4.0924           | 2.381            | C           | -1.04            | 4.2957           | 2.5913           |
| C           | 2.5024           | 3.576            | -1.3601          | C           | 0.3288           | 2.6173           | -2.0748          |
| O           | 2.2842           | 4.6201           | -1.9584          | O           | -0.5818          | 3.0512           | -2.7635          |
| O           | 0.449            | 5.0191           | 0.1543           | O           | -1.3484          | 4.1355           | -0.1649          |
| C           | -1.5477          | 0.676            | -0.872           | C           | -1.1493          | -0.363           | 1.6917           |
| O           | -2.8534          | 0.6748           | -0.3868          | O           | -1.4331          | -1.1059          | 0.541            |
| C           | -1.3244          | 0.0679           | -2.0355          | C           | -1.6759          | -0.8017          | 2.8336           |
| C           | -5.5887          | 1.6226           | -0.9529          | C           | -0.8942          | -3.7852          | -0.6166          |

|   |         |         |         |   |         |         |         |
|---|---------|---------|---------|---|---------|---------|---------|
| C | -4.5794 | 1.1391  | -1.988  | C | -1.217  | -3.4852 | 0.8418  |
| C | -3.6809 | 0.0482  | -1.3958 | C | -2.1651 | -2.2844 | 0.955   |
| C | -4.5174 | -1.1787 | -0.8797 | C | -3.5027 | -2.5269 | 0.167   |
| C | -5.6539 | -0.7433 | 0.1201  | C | -3.2413 | -2.9417 | -1.3305 |
| C | -6.448  | 0.4734  | -0.4386 | C | -2.1614 | -4.0584 | -1.4167 |
| C | -3.6499 | -2.3028 | -0.2552 | C | -4.4991 | -1.3385 | 0.2225  |
| C | -3.0992 | -1.9948 | 1.1478  | C | -4.1323 | -0.128  | -0.6593 |
| C | -4.2221 | -1.5472 | 2.0986  | C | -3.8034 | -0.5523 | -2.0986 |
| C | -5.0587 | -0.4052 | 1.5114  | C | -2.808  | -1.7126 | -2.1676 |
| C | -2.2544 | -3.1528 | 1.6509  | C | -5.1642 | 0.991   | -0.6656 |
| C | -0.8581 | -3.2519 | 1.1236  | C | -4.6752 | 2.3696  | -0.9759 |
| C | -2.615  | -4.0857 | 2.547   | C | -6.4756 | 0.8816  | -0.3957 |
| O | -0.3802 | -2.4334 | 0.3441  | O | -3.4956 | 2.6281  | -1.1849 |
| C | -6.7099 | -1.8724 | 0.3105  | C | -4.5151 | -3.5487 | -1.9896 |
| C | -2.6513 | -0.3816 | -2.4175 | C | -2.414  | -1.9827 | 2.4148  |
| O | -2.8681 | -1.0347 | -3.4292 | O | -3.1427 | -2.613  | 3.1683  |
| C | 3.9383  | -4.4785 | 0.8159  | C | 5.3377  | -3.7708 | 0.1988  |
| C | 3.5816  | -3.0115 | 0.8823  | C | 4.1493  | -2.8454 | 0.076   |
| C | 4.1412  | -2.0676 | 0.0853  | C | 4.2507  | -1.5058 | -0.1087 |
| C | 5.1326  | -2.4446 | -1.0331 | C | 5.6282  | -0.8181 | -0.2221 |
| C | 5.1877  | -3.9779 | -1.2826 | C | 6.7802  | -1.8378 | -0.4406 |
| C | 3.8692  | -0.5718 | 0.1732  | C | 3.0718  | -0.5439 | -0.2073 |
| C | 3.362   | 0.0084  | -1.1634 | C | 3.1472  | 0.369   | -1.4442 |
| C | 4.3793  | -0.2948 | -2.2769 | C | 4.4817  | 1.1227  | -1.4862 |
| C | 4.6854  | -1.7907 | -2.368  | C | 5.6564  | 0.1492  | -1.4354 |
| C | 3.0091  | 1.4791  | -1.0488 | C | 1.9998  | 1.3453  | -1.4942 |
| C | 3.0912  | 2.4089  | -1.9991 | C | 1.1564  | 1.501   | -2.5109 |
| O | 2.4818  | 1.8833  | 0.1783  | O | 1.8219  | 2.1662  | -0.384  |
| C | 6.5512  | -1.9592 | -0.655  | C | 5.9065  | -0.0321 | 1.0815  |
| C | 2.5405  | -2.712  | 1.9173  | C | 2.8413  | -3.5582 | 0.2107  |
| O | 2.0627  | -3.5779 | 2.6456  | O | 2.7531  | -4.7798 | 0.2699  |
| O | -5.1916 | -1.7707 | -2.019  | O | -4.1826 | -3.6508 | 0.7811  |
| C | 5.2004  | -4.7703 | 0.0139  | C | 6.6552  | -3.0537 | 0.462   |
| H | 3.1175  | 2.7221  | 2.6829  | H | 2.8697  | 4.3365  | 0.741   |
| H | 3.5954  | 4.3667  | 3.0635  | H | 2.5413  | 5.9797  | 0.2197  |
| H | 3.093   | 5.134   | 0.7944  | H | 0.8035  | 5.2264  | -1.3448 |
| H | 4.1948  | 3.7626  | 0.7505  | H | 2.3229  | 4.3932  | -1.6477 |
| H | 1.358   | 5.2088  | 2.7649  | H | 0.3182  | 5.9493  | 1.1311  |
| H | 1.3197  | 3.8726  | 3.8997  | H | 1.4484  | 5.4764  | 2.3849  |
| H | -1.3242 | 3.3047  | -0.3384 | H | -2.0249 | 2.0652  | 1.0566  |
| H | -0.0872 | 2.9023  | -1.4724 | H | -1.2812 | 1.4079  | -0.3653 |
| H | 0.4472  | 0.8134  | -0.2628 | H | 0.5899  | 0.5076  | 0.9159  |
| H | -1.7261 | 1.4515  | 1.7638  | H | -0.5774 | 1.7006  | 3.4604  |
| H | -0.6306 | 0.085   | 1.7392  | H | 0.9195  | 0.811   | 3.2705  |
| H | 1.2754  | 1.4363  | 2.2395  | H | 1.9351  | 2.5919  | 1.993   |
| H | 0.0215  | 1.8039  | 3.3903  | H | 1.2825  | 3.2481  | 3.4689  |
| H | -1.8154 | 3.714   | 1.8078  | H | -1.7461 | 3.4852  | 2.7904  |

|             |                  |                  |                  |              |                  |                  |                  |
|-------------|------------------|------------------|------------------|--------------|------------------|------------------|------------------|
| H           | -1.182           | 3.9129           | 3.4408           | H            | -0.6843          | 4.6653           | 3.5604           |
| H           | -0.9374          | 5.1787           | 2.2403           | H            | -1.6092          | 5.11             | 2.1288           |
| H           | 0.7274           | 5.2063           | -0.7665          | H            | -1.8997          | 3.6588           | -0.8295          |
| H           | -0.4173          | -0.084           | -2.587           | H            | -1.6304          | -0.4168          | 3.8341           |
| H           | -5.0739          | 2.1131           | -0.119           | H            | -0.336           | -2.9542          | -1.0622          |
| H           | -6.2356          | 2.3826           | -1.4066          | H            | -0.2384          | -4.6621          | -0.669           |
| H           | -5.1041          | 0.77             | -2.8779          | H            | -1.6574          | -4.3716          | 1.3153           |
| H           | -3.9787          | 1.9988           | -2.3122          | H            | -0.2766          | -3.2853          | 1.3707           |
| H           | -7.0847          | 0.1411           | -1.2701          | H            | -2.5856          | -5.0043          | -1.0528          |
| H           | -7.1321          | 0.8577           | 0.329            | H            | -1.8877          | -4.2348          | -2.465           |
| H           | -2.8298          | -2.556           | -0.9389          | H            | -5.4886          | -1.7191          | -0.0608          |
| H           | -4.2412          | -3.2285          | -0.2137          | H            | -4.6306          | -1.0092          | 1.2615           |
| H           | -2.4236          | -1.1419          | 1.0813           | H            | -3.2287          | 0.2981           | -0.2234          |
| H           | -3.7874          | -1.2133          | 3.0495           | H            | -3.3799          | 0.2952           | -2.6526          |
| H           | -4.8847          | -2.3841          | 2.344            | H            | -4.7237          | -0.8236          | -2.6305          |
| H           | -5.8674          | -0.1698          | 2.2156           | H            | -2.6864          | -2.0025          | -3.2196          |
| H           | -4.4415          | 0.4975           | 1.4666           | H            | -1.8247          | -1.349           | -1.8535          |
| H           | -0.2717          | -4.1168          | 1.4774           | H            | -5.4444          | 3.1602           | -1.0005          |
| H           | -1.9402          | -4.8747          | 2.8691           | H            | -7.1483          | 1.735            | -0.411           |
| H           | -3.6027          | -4.1005          | 2.9953           | H            | -6.9373          | -0.0707          | -0.1564          |
| H           | -6.2686          | -2.8135          | 0.6487           | H            | -5.3726          | -2.8715          | -1.96            |
| H           | -7.4616          | -1.5792          | 1.0531           | H            | -4.3286          | -3.7901          | -3.0429          |
| H           | -7.2476          | -2.0864          | -0.6201          | H            | -4.8218          | -4.4789          | -1.4984          |
| H           | 4.0837           | -4.8834          | 1.8249           | H            | 5.1819           | -4.4901          | 1.0122           |
| H           | 3.0937           | -5.0198          | 0.3704           | H            | 5.4206           | -4.3498          | -0.73            |
| H           | 4.3163           | -4.3             | -1.8692          | H            | 6.7847           | -2.1865          | -1.4826          |
| H           | 6.0691           | -4.2379          | -1.8822          | H            | 7.7529           | -1.3572          | -0.2765          |
| H           | 3.1527           | -0.3371          | 0.9611           | H            | 2.1111           | -1.0613          | -0.2449          |
| H           | 4.7916           | -0.0592          | 0.4756           | H            | 3.0475           | 0.0574           | 0.7106           |
| H           | 2.4246           | -0.5112          | -1.4115          | H            | 3.0953           | -0.2728          | -2.336           |
| H           | 3.9875           | 0.0303           | -3.2486          | H            | 4.5493           | 1.7128           | -2.4092          |
| H           | 5.3065           | 0.2669           | -2.1099          | H            | 4.5524           | 1.8391           | -0.6586          |
| H           | 3.7763           | -2.2892          | -2.7329          | H            | 5.6495           | -0.431           | -2.3687          |
| H           | 5.4505           | -1.9508          | -3.1387          | H            | 6.5932           | 0.7212           | -1.4381          |
| H           | 3.419            | 2.3566           | -3.0196          | H            | 1.0907           | 1.001            | -3.458           |
| H           | 7.2846           | -2.2655          | -1.41            | H            | 6.8966           | 0.4373           | 1.0525           |
| H           | 6.616            | -0.8698          | -0.5751          | H            | 5.1785           | 0.767            | 1.2536           |
| H           | 6.875            | -2.3703          | 0.3075           | H            | 5.8745           | -0.6833          | 1.9618           |
| H           | 2.1928           | -1.6747          | 1.9972           | H            | 1.939            | -2.9387          | 0.2622           |
| H           | -4.5249          | -1.9602          | -2.7126          | H            | -4.2655          | -3.4807          | 1.7433           |
| H           | 6.089            | -4.5239          | 0.6064           | H            | 6.719            | -2.7587          | 1.5156           |
| H           | 5.2566           | -5.8432          | -0.2031          | H            | 7.4892           | -3.7416          | 0.2806           |
| <b>3c-9</b> | <b>X axis(Å)</b> | <b>Y axis(Å)</b> | <b>Z axis(Å)</b> | <b>3c-10</b> | <b>X axis(Å)</b> | <b>Y axis(Å)</b> | <b>Z axis(Å)</b> |
| C           | -2.7716          | 4.9107           | -0.1837          | C            | -2.2119          | 5.1543           | -1.1113          |
| C           | -2.167           | 4.4021           | 1.1194           | C            | -2.3095          | 4.5542           | 0.2855           |
| C           | -1.184           | 3.2529           | 0.8538           | C            | -1.2451          | 3.4669           | 0.4936           |
| C           | -0.0336          | 3.6897           | -0.1156          | C            | 0.2035           | 4.0227           | 0.2671           |



|   |         |         |         |   |         |         |         |
|---|---------|---------|---------|---|---------|---------|---------|
| C | -0.587  | 4.3163  | -1.4509 | C | 0.3464  | 4.7302  | -1.1332 |
| C | -1.6891 | 5.373   | -1.1516 | C | -0.824  | 5.7274  | -1.3707 |
| C | 0.9689  | 2.5538  | -0.4309 | C | 1.3222  | 2.9651  | 0.4481  |
| C | 0.4643  | 1.4886  | -1.4146 | C | 1.4683  | 1.9599  | -0.7062 |
| C | -0.1258 | 2.1106  | -2.6885 | C | 1.4907  | 2.636   | -2.0851 |
| C | -1.1446 | 3.2122  | -2.3861 | C | 0.3904  | 3.6802  | -2.2713 |
| C | 0.5259  | 5.0848  | -2.2227 | C | 1.644   | 5.5862  | -1.2131 |
| C | -0.6611 | 2.721   | 2.1723  | C | -1.4148 | 2.8655  | 1.8693  |
| O | 0.2143  | 3.2209  | 2.865   | O | -1.0633 | 3.3731  | 2.9256  |
| O | 0.7168  | 4.739   | 0.542   | O | 0.4519  | 5.0458  | 1.2635  |
| C | 1.5511  | 0.4791  | -1.7045 | C | 2.688   | 1.0752  | -0.5698 |
| O | 1.4713  | -0.7174 | -0.9888 | O | 2.4899  | -0.2826 | -0.8304 |
| C | 2.5683  | 0.6138  | -2.5543 | C | 3.9219  | 1.4568  | -0.2427 |
| C | 0.9864  | -3.5948 | -1.4678 | C | 3.239   | -2.2439 | -2.9278 |
| C | 1.8151  | -2.6714 | -2.3506 | C | 4.1375  | -1.1564 | -2.3523 |
| C | 2.5045  | -1.5898 | -1.5082 | C | 3.7999  | -0.8968 | -0.8785 |
| C | 3.432   | -2.2153 | -0.4057 | C | 3.9387  | -2.1967 | -0.0114 |
| C | 2.666   | -3.2649 | 0.485   | C | 3.1273  | -3.4068 | -0.6103 |
| C | 1.8479  | -4.2525 | -0.3968 | C | 3.3742  | -3.5414 | -2.1406 |
| C | 4.1328  | -1.1604 | 0.4891  | C | 3.5732  | -1.9893 | 1.4822  |
| C | 3.2285  | -0.4808 | 1.5351  | C | 2.0644  | -1.8821 | 1.7879  |
| C | 2.4637  | -1.5255 | 2.366   | C | 1.3016  | -3.0594 | 1.1612  |
| C | 1.7321  | -2.5458 | 1.491   | C | 1.6149  | -3.2405 | -0.3254 |
| C | 4.0231  | 0.5221  | 2.358   | C | 1.7333  | -1.7604 | 3.2698  |
| C | 4.3783  | 1.8094  | 1.6879  | C | 0.3851  | -1.2245 | 3.6258  |
| C | 4.4152  | 0.396   | 3.6364  | C | 2.5353  | -2.0502 | 4.3081  |
| O | 4.0764  | 2.0546  | 0.5259  | O | -0.45   | -0.9068 | 2.7874  |
| C | 3.6536  | -4.1563 | 1.2945  | C | 3.5856  | -4.7639 | 0.0018  |
| C | 3.2633  | -0.6556 | -2.4237 | C | 4.6733  | 0.2186  | -0.3489 |
| O | 4.3161  | -0.9054 | -2.9946 | O | 5.8519  | 0.1261  | -0.0347 |
| C | -4.2647 | -4.5247 | 0.0629  | C | -6.2461 | -3.2262 | -1.0498 |
| C | -3.276  | -3.4173 | 0.3472  | C | -5.6785 | -2.035  | -0.3118 |
| C | -3.5394 | -2.1023 | 0.1478  | C | -4.3502 | -1.7984 | -0.1747 |
| C | -4.9383 | -1.628  | -0.3024 | C | -3.3006 | -2.7354 | -0.8092 |
| C | -6.0003 | -2.761  | -0.2312 | C | -3.9295 | -3.7232 | -1.8309 |
| C | -2.5424 | -0.9623 | 0.3297  | C | -3.7381 | -0.6349 | 0.5976  |
| C | -3.0668 | 0.111   | 1.2972  | C | -2.7369 | 0.1749  | -0.2508 |
| C | -4.4332 | 0.641   | 0.8352  | C | -1.6408 | -0.7442 | -0.8029 |
| C | -5.4337 | -0.4964 | 0.6389  | C | -2.2392 | -1.9112 | -1.5856 |
| C | -2.083  | 1.2424  | 1.4569  | C | -2.1282 | 1.3567  | 0.4711  |
| C | -1.3508 | 1.4928  | 2.54    | C | -2.0691 | 1.5711  | 1.7845  |
| O | -1.9503 | 2.1184  | 0.3805  | O | -1.5857 | 2.3451  | -0.3542 |
| C | -4.8681 | -1.1154 | -1.76   | C | -2.6159 | -3.5563 | 0.3078  |
| C | -1.9726 | -3.925  | 0.8754  | C | -6.7404 | -1.1541 | 0.2694  |
| O | -1.73   | -5.1189 | 1.0138  | O | -7.9368 | -1.3433 | 0.0747  |
| O | 4.4875  | -2.9494 | -1.0741 | O | 5.331   | -2.6025 | -0.0366 |
| C | -5.4671 | -4.0815 | -0.7603 | C | -5.2295 | -4.3262 | -1.3259 |

|   |         |         |         |   |         |         |           |
|---|---------|---------|---------|---|---------|---------|-----------|
| H | -3.3876 | 4.1314  | -0.6465 | H | -2.4593 | 4.4001  | -1.8666   |
| H | -3.4447 | 5.7486  | 0.0327  | H | -2.9575 | 5.9514  | -1.2155   |
| H | -1.6658 | 5.2247  | 1.6447  | H | -2.2038 | 5.3458  | 1.038     |
| H | -2.9862 | 4.0704  | 1.7703  | H | -3.3176 | 4.1384  | 0.4103    |
| H | -1.2251 | 6.2725  | -0.7241 | H | -0.697  | 6.6009  | -0.7164   |
| H | -2.1636 | 5.6949  | -2.0875 | H | -0.7858 | 6.1123  | -2.3979   |
| H | 1.8931  | 3.0016  | -0.821  | H | 2.2699  | 3.4965  | 0.606     |
| H | 1.2841  | 2.0731  | 0.5028  | H | 1.1752  | 2.4187  | 1.3892    |
| H | -0.3464 | 0.9298  | -0.9374 | H | 0.5987  | 1.2984  | -0.672    |
| H | 0.6653  | 2.52    | -3.3271 | H | 2.4651  | 3.1087  | -2.2621   |
| H | -0.6157 | 1.3294  | -3.2841 | H | 1.3875  | 1.8733  | -2.8684   |
| H | -2.0435 | 2.7535  | -1.963  | H | -0.5688 | 3.1644  | -2.3731   |
| H | -1.467  | 3.657   | -3.3367 | H | 0.549   | 4.1823  | -3.2349   |
| H | 1.3917  | 4.4584  | -2.453  | H | 2.5493  | 5.0028  | -1.0255   |
| H | 0.1416  | 5.4719  | -3.1739 | H | 1.7496  | 6.0382  | -2.2066   |
| H | 0.894   | 5.9455  | -1.653  | H | 1.633   | 6.4075  | -0.4879   |
| H | 1.0805  | 4.3796  | 1.3779  | H | 0.2615  | 4.6696  | 2.1492    |
| H | 2.8594  | 1.4315  | -3.1849 | H | 4.3256  | 2.421   | -3.00E-04 |
| H | 0.1645  | -3.0368 | -1.0072 | H | 2.195   | -1.9111 | -2.9365   |
| H | 0.5239  | -4.3717 | -2.0878 | H | 3.5149  | -2.4252 | -3.9733   |
| H | 2.5549  | -3.2557 | -2.912  | H | 5.1904  | -1.4447 | -2.4629   |
| H | 1.1475  | -2.2158 | -3.0934 | H | 3.9989  | -0.245  | -2.9479   |
| H | 2.5362  | -4.9419 | -0.9049 | H | 4.3879  | -3.9284 | -2.3132   |
| H | 1.2089  | -4.8795 | 0.238   | H | 2.6907  | -4.2876 | -2.566    |
| H | 4.9798  | -1.6356 | 1.004   | H | 4.0053  | -2.8248 | 2.0484    |
| H | 4.6138  | -0.4088 | -0.1486 | H | 4.0922  | -1.1059 | 1.876     |
| H | 2.4612  | 0.101   | 1.0178  | H | 1.7031  | -0.9589 | 1.3231    |
| H | 1.7296  | -1.0199 | 3.0065  | H | 0.2227  | -2.9091 | 1.2657    |
| H | 3.1408  | -2.0601 | 3.0412  | H | 1.5221  | -3.9854 | 1.7061    |
| H | 1.2507  | -3.2836 | 2.1461  | H | 1.0662  | -4.1182 | -0.6916   |
| H | 0.914   | -2.0376 | 0.9729  | H | 1.2035  | -2.3898 | -0.8775   |
| H | 4.9357  | 2.5375  | 2.3012  | H | 0.1736  | -1.1276 | 4.7044    |
| H | 4.9706  | 1.1725  | 4.1554  | H | 2.2246  | -1.9208 | 5.3415    |
| H | 4.2026  | -0.494  | 4.2191  | H | 3.5403  | -2.4362 | 4.1722    |
| H | 4.3342  | -3.5746 | 1.9215  | H | 3.5153  | -4.7831 | 1.0924    |
| H | 3.1067  | -4.8404 | 1.9543  | H | 2.971   | -5.5883 | -0.3789   |
| H | 4.2737  | -4.7752 | 0.6363  | H | 4.625   | -4.9953 | -0.257    |
| H | -3.776  | -5.3455 | -0.4763 | H | -7.0716 | -3.672  | -0.4813   |
| H | -4.6133 | -4.9314 | 1.021   | H | -6.6648 | -2.8742 | -2.0015   |
| H | -6.3228 | -2.9159 | 0.8077  | H | -4.1397 | -3.2072 | -2.7778   |
| H | -6.9017 | -2.4776 | -0.789  | H | -3.2214 | -4.5258 | -2.0728   |
| H | -1.5681 | -1.3032 | 0.685   | H | -4.4925 | 0.0583  | 0.9741    |
| H | -2.3406 | -0.5195 | -0.654  | H | -3.2436 | -1.0395 | 1.4895    |
| H | -3.2085 | -0.3635 | 2.2794  | H | -3.299  | 0.5845  | -1.1033   |
| H | -4.8314 | 1.3427  | 1.5793  | H | -1.0096 | -1.1195 | 0.0102    |
| H | -4.338  | 1.2073  | -0.0993 | H | -0.9802 | -0.1841 | -1.4754   |
| H | -5.6583 | -0.9148 | 1.63    | H | -2.6928 | -1.4973 | -2.497    |

|              |                  |                  |                  |              |                  |                  |                  |
|--------------|------------------|------------------|------------------|--------------|------------------|------------------|------------------|
| H            | -6.3768          | -0.0803          | 0.2618           | H            | -1.4261          | -2.5676          | -1.9219          |
| H            | -1.2723          | 0.9754           | 3.4765           | H            | -2.3858          | 0.9719           | 2.6163           |
| H            | -5.8604          | -0.8191          | -2.1193          | H            | -1.873           | -4.2457          | -0.1097          |
| H            | -4.218           | -0.242           | -1.8697          | H            | -2.0956          | -2.9224          | 1.0312           |
| H            | -4.4853          | -1.8844          | -2.4399          | H            | -3.3392          | -4.1522          | 0.8749           |
| H            | -1.2266          | -3.1765          | 1.1631           | H            | -6.4112          | -0.3114          | 0.8889           |
| H            | 4.9277           | -2.3488          | -1.7127          | H            | 5.8861           | -1.839           | 0.23             |
| H            | -5.1878          | -3.9887          | -1.8161          | H            | -5.0543          | -4.9134          | -0.4173          |
| H            | -6.2486          | -4.8485          | -0.71            | H            | -5.6344          | -5.0202          | -2.0716          |
| <b>3c-11</b> | <b>X axis(Å)</b> | <b>Y axis(Å)</b> | <b>Z axis(Å)</b> | <b>3c-12</b> | <b>X axis(Å)</b> | <b>Y axis(Å)</b> | <b>Z axis(Å)</b> |
| C            | 4.6198           | -3.1791          | -0.7886          | C            | -2.1428          | 4.9962           | -1.5178          |
| C            | 4.0349           | -3.1056          | 0.6161           | C            | -2.3973          | 4.553            | -0.082           |
| C            | 2.6114           | -2.528           | 0.5897           | C            | -1.3602          | 3.5089           | 0.3582           |
| C            | 1.6602           | -3.3748          | -0.3219          | C            | 0.0982           | 4.0676           | 0.2457           |
| C            | 2.2497           | -3.558           | -1.7706          | C            | 0.4058           | 4.6227           | -1.1947          |
| C            | 3.7369           | -4.0112          | -1.7104          | C            | -0.7366          | 5.5602           | -1.6823          |
| C            | 0.2099           | -2.835           | -0.3965          | C            | 1.1955           | 3.065            | 0.6763           |
| C            | -0.0041          | -1.6027          | -1.2935          | C            | 1.4996           | 1.9339           | -0.3229          |
| C            | 0.6932           | -1.7197          | -2.659           | C            | 1.685            | 2.4639           | -1.7544          |
| C            | 2.1271           | -2.2409          | -2.5768          | C            | 0.6052           | 3.4548           | -2.192           |
| C            | 1.5055           | -4.679           | -2.5533          | C            | 1.6936           | 5.4976           | -1.2114          |
| C            | 2.0961           | -2.4163          | 2.0075           | C            | -1.6836          | 3.0373           | 1.7566           |
| O            | 1.6927           | -3.3436          | 2.6965           | O            | -1.4751          | 3.6541           | 2.7923           |
| O            | 1.5648           | -4.7051          | 0.2469           | O            | 0.2106           | 5.1982           | 1.1473           |
| C            | -1.4818          | -1.3265          | -1.4903          | C            | 2.714            | 1.1047           | 0.0532           |
| O            | -1.9625          | -0.1             | -1.0261          | O            | 2.8496           | -0.1067          | -0.633           |
| C            | -2.3614          | -2.1484          | -2.0621          | C            | 3.6486           | 1.3899           | 0.9592           |
| C            | -3.1504          | 2.426            | -2.095           | C            | 4.645            | -1.3912          | -2.6199          |
| C            | -3.413           | 1.0147           | -2.6018          | C            | 5.0747           | -0.4943          | -1.4657          |
| C            | -3.346           | -5.00E-04        | -1.454           | C            | 4.1343           | -0.6627          | -0.2665          |
| C            | -4.3626          | 0.3441           | -0.3062          | C            | 4.0738           | -2.1517          | 0.2261           |
| C            | -4.2254          | 1.8318           | 0.1914           | C            | 3.7396           | -3.1534          | -0.9438          |
| C            | -4.1464          | 2.8169           | -1.0104          | C            | 4.6124           | -2.855           | -2.1969          |
| C            | -4.2942          | -0.634           | 0.8973           | C            | 3.1038           | -2.3649          | 1.4174           |
| C            | -3.0821          | -0.4449          | 1.8336           | C            | 1.6108           | -2.3715          | 1.0486           |
| C            | -2.96            | 1.0219           | 2.2764           | C            | 1.318            | -3.3331          | -0.1133          |
| C            | -2.9774          | 1.9877           | 1.0911           | C            | 2.2358           | -3.0851          | -1.3123          |
| C            | -3.0658          | -1.3738          | 3.0392           | C            | 0.7674           | -2.6412          | 2.2823           |
| C            | -1.7509          | -1.5621          | 3.7223           | C            | 0.113            | -1.4764          | 2.9459           |
| C            | -4.0947          | -2.0768          | 3.5403           | C            | 0.5549           | -3.8457          | 2.838            |
| O            | -0.7355          | -0.9734          | 3.3706           | O            | 0.1808           | -0.3328          | 2.5113           |
| C            | -5.4698          | 2.2809           | 1.013            | C            | 4.0723           | -4.6226          | -0.5478          |
| C            | -3.5942          | -1.3867          | -2.0058          | C            | 4.5614           | 0.2667           | 0.8455           |
| O            | -4.6739          | -1.8461          | -2.3515          | O            | 5.5299           | 0.1168           | 1.5779           |
| C            | 1.9468           | 5.694            | -0.3544          | C            | -6.3263          | -3.2581          | -0.9666          |
| C            | 1.5674           | 4.2432           | -0.1715          | C            | -5.7626          | -2.0503          | -0.252           |
| C            | 2.465            | 3.2329           | -0.0588          | C            | -4.4354          | -1.7932          | -0.1408          |

|   |         |         |         |   |         |         |         |
|---|---------|---------|---------|---|---------|---------|---------|
| C | 3.9825  | 3.51    | -0.1066 | C | -3.3849 | -2.7213 | -0.7862 |
| C | 4.3136  | 5.0199  | 0.0539  | C | -4.0189 | -3.7192 | -1.7944 |
| C | 2.1082  | 1.7573  | 0.1041  | C | -3.8275 | -0.6138 | 0.6092  |
| C | 2.8505  | 1.0853  | 1.2747  | C | -2.8462 | 0.1982  | -0.2601 |
| C | 4.3654  | 1.291   | 1.1553  | C | -1.7436 | -0.7157 | -0.807  |
| C | 4.7072  | 2.7739  | 1.0502  | C | -2.3432 | -1.889  | -1.5813 |
| C | 2.5497  | -0.3887 | 1.3681  | C | -2.2564 | 1.4065  | 0.4315  |
| C | 2.1637  | -1.0372 | 2.4649  | C | -2.3207 | 1.7301  | 1.7224  |
| O | 2.708   | -1.1378 | 0.2037  | O | -1.6003 | 2.3078  | -0.4106 |
| C | 4.538   | 3.0257  | -1.4673 | C | -2.6789 | -3.5303 | 0.3267  |
| C | 0.0887  | 4.0257  | -0.1633 | C | -6.8288 | -1.1774 | 0.3347  |
| O | -0.7197 | 4.9473  | -0.1392 | O | -8.0251 | -1.4031 | 0.1848  |
| O | -5.7041 | 0.2324  | -0.8463 | O | 5.3923  | -2.5221 | 0.7014  |
| C | 3.3958  | 5.9049  | -0.7725 | C | -5.2978 | -4.3422 | -1.2611 |
| H | 4.7537  | -2.1713 | -1.1976 | H | -2.2981 | 4.1587  | -2.2072 |
| H | 5.6188  | -3.6284 | -0.7417 | H | -2.875  | 5.7638  | -1.7948 |
| H | 4.0378  | -4.1032 | 1.073   | H | -2.3783 | 5.423   | 0.5862  |
| H | 4.6959  | -2.4802 | 1.23    | H | -3.4125 | 4.1396  | -0.0257 |
| H | 3.7867  | -5.0535 | -1.3667 | H | -0.6928 | 6.5066  | -1.1259 |
| H | 4.1717  | -4.0053 | -2.7183 | H | -0.5811 | 5.8234  | -2.7365 |
| H | -0.4393 | -3.6557 | -0.7319 | H | 2.11    | 3.64    | 0.8737  |
| H | -0.1626 | -2.6159 | 0.6131  | H | 0.9455  | 2.6312  | 1.6534  |
| H | 0.4249  | -0.7355 | -0.7793 | H | 0.646   | 1.2481  | -0.3196 |
| H | 0.1229  | -2.3717 | -3.3319 | H | 2.6705  | 2.9366  | -1.8551 |
| H | 0.7026  | -0.7356 | -3.1461 | H | 1.6892  | 1.623   | -2.4607 |
| H | 2.7642  | -1.456  | -2.1596 | H | -0.3283 | 2.9082  | -2.3544 |
| H | 2.4976  | -2.3954 | -3.5989 | H | 0.8795  | 3.8515  | -3.1785 |
| H | 0.4296  | -4.5006 | -2.6294 | H | 2.5768  | 4.9607  | -0.8558 |
| H | 1.8943  | -4.7619 | -3.5752 | H | 1.913   | 5.8443  | -2.2283 |
| H | 1.6369  | -5.6588 | -2.0806 | H | 1.5851  | 6.3905  | -0.5856 |
| H | 1.3102  | -4.6199 | 1.1907  | H | -0.0578 | 4.905   | 2.0441  |
| H | -2.2423 | -3.1305 | -2.4784 | H | 3.7704  | 2.2248  | 1.6218  |
| H | -2.1255 | 2.5074  | -1.7195 | H | 3.6637  | -1.0824 | -2.9973 |
| H | -3.2305 | 3.1316  | -2.9303 | H | 5.3483  | -1.2712 | -3.4523 |
| H | -4.3917 | 0.9744  | -3.0964 | H | 6.1092  | -0.7234 | -1.1811 |
| H | -2.6646 | 0.7796  | -3.3694 | H | 5.0697  | 0.5455  | -1.8175 |
| H | -5.1355 | 2.8954  | -1.4823 | H | 5.648   | -3.1662 | -2.0023 |
| H | -3.9026 | 3.8255  | -0.6523 | H | 4.27    | -3.462  | -3.0449 |
| H | -5.2236 | -0.5242 | 1.4715  | H | 3.3613  | -3.3112 | 1.9137  |
| H | -4.3248 | -1.6708 | 0.5381  | H | 3.2903  | -1.6097 | 2.1921  |
| H | -2.1869 | -0.6959 | 1.2562  | H | 1.3396  | -1.3787 | 0.6813  |
| H | -2.0246 | 1.1803  | 2.8263  | H | 1.4103  | -4.3779 | 0.2018  |
| H | -3.763  | 1.2733  | 2.9798  | H | 0.2787  | -3.2108 | -0.4362 |
| H | -2.9157 | 3.0144  | 1.4747  | H | 2.0062  | -3.8296 | -2.0858 |
| H | -2.064  | 1.8329  | 0.5116  | H | 1.9821  | -2.1173 | -1.7561 |
| H | -1.7412 | -2.2651 | 4.5724  | H | -0.4554 | -1.7036 | 3.8638  |
| H | -3.9901 | -2.7317 | 4.4012  | H | -0.0583 | -3.9841 | 3.7238  |

|             |                  |                  |                  |             |                  |                  |                  |
|-------------|------------------|------------------|------------------|-------------|------------------|------------------|------------------|
| H           | -5.0915          | -2.0232          | 3.1147           | H           | 1.007            | -4.7444          | 2.4285           |
| H           | -5.6724          | 1.6292           | 1.8668           | H           | 3.5661           | -4.9395          | 0.3678           |
| H           | -5.3307          | 3.296            | 1.4038           | H           | 3.7738           | -5.316           | -1.3431          |
| H           | -6.3772          | 2.2975           | 0.3988           | H           | 5.1466           | -4.7661          | -0.3865          |
| H           | 1.3095           | 6.1653           | -1.1128          | H           | -7.1291          | -3.7142          | -0.3743          |
| H           | 1.7628           | 6.22             | 0.5912           | H           | -6.7749          | -2.9212          | -1.9101          |
| H           | 4.2171           | 5.3189           | 1.1068           | H           | -4.2568          | -3.2068          | -2.7368          |
| H           | 5.3576           | 5.2141           | -0.2229          | H           | -3.3036          | -4.5108          | -2.051           |
| H           | 1.0402           | 1.5987           | 0.2678           | H           | -4.5872          | 0.0723           | 0.9879           |
| H           | 2.3404           | 1.2477           | -0.8399          | H           | -3.3136          | -1.001           | 1.4986           |
| H           | 2.5159           | 1.5689           | 2.204            | H           | -3.4202          | 0.5845           | -1.1158          |
| H           | 4.8702           | 0.8729           | 2.0358           | H           | -1.0826          | -0.1563          | -1.4807          |
| H           | 4.766            | 0.751            | 0.2885           | H           | -1.1135          | -1.0832          | 0.0096           |
| H           | 4.447            | 3.2458           | 2.0078           | H           | -2.8156          | -1.4797          | -2.4854          |
| H           | 5.7942           | 2.8818           | 0.9416           | H           | -1.5317          | -2.5387          | -1.9324          |
| H           | 1.9573           | -0.6864          | 3.4578           | H           | -2.7464          | 1.2239           | 2.5663           |
| H           | 5.6101           | 3.2381           | -1.5511          | H           | -1.9697          | -4.2491          | -0.099           |
| H           | 4.4126           | 1.9482           | -1.6127          | H           | -2.1162          | -2.8915          | 1.0133           |
| H           | 4.0365           | 3.5178           | -2.3078          | H           | -3.3949          | -4.0944          | 0.9345           |
| H           | -0.2581          | 2.9876           | -0.1919          | H           | -6.5029          | -0.3068          | 0.916            |
| H           | -5.8009          | -0.6428          | -1.2778          | H           | 5.69             | -1.8532          | 1.3543           |
| H           | 3.5142           | 5.6907           | -1.8408          | H           | -5.0938          | -4.9237          | -0.3549          |
| H           | 3.6674           | 6.9579           | -0.6344          | H           | -5.7068          | -5.045           | -1.9963          |
| <b>3d-1</b> | <b>X axis(Å)</b> | <b>Y axis(Å)</b> | <b>Z axis(Å)</b> | <b>3d-2</b> | <b>X axis(Å)</b> | <b>Y axis(Å)</b> | <b>Z axis(Å)</b> |
| C           | 5.5594           | 1.3904           | 0.9978           | C           | -2.6912          | 5.0272           | 0.2562           |
| C           | 5.2394           | 1.2256           | -0.4824          | C           | -2.1723          | 4.5989           | -1.1114          |
| C           | 3.9399           | 0.4312           | -0.6769          | C           | -1.1199          | 3.4894           | -0.9705          |
| C           | 4.0165           | -0.9815          | -0.0024          | C           | 0.0884           | 3.9531           | -0.0883          |
| C           | 4.441            | -0.8924          | 1.5115           | C           | -0.3811          | 4.4922           | 1.3134           |
| C           | 5.6753           | 0.0378           | 1.6893           | C           | -1.5555          | 5.5009           | 1.1551           |
| C           | 2.7174           | -1.8117          | -0.1509          | C           | 1.1821           | 2.8736           | 0.0893           |
| C           | 1.5564           | -1.4054          | 0.7732           | C           | 0.8473           | 1.7329           | 1.0672           |
| C           | 2.0031           | -1.2417          | 2.2338           | C           | 0.2976           | 2.2664           | 2.4011           |
| C           | 3.2613           | -0.3843          | 2.3781           | C           | -0.8024          | 3.3164           | 2.2311           |
| C           | 4.8858           | -2.2797          | 2.0615           | C           | 0.7512           | 5.286            | 2.0289           |
| C           | 3.6269           | 0.341            | -2.1533          | C           | -0.6859          | 3.0251           | -2.3421          |
| O           | 4.1557           | -0.4091          | -2.9616          | O           | 0.0955           | 3.5993           | -3.0874          |
| O           | 5.0607           | -1.7341          | -0.6689          | O           | 0.7244           | 5.0682           | -0.7612          |
| C           | 0.4214           | -2.3901          | 0.5924           | C           | 2.0715           | 0.8506           | 1.2176           |
| O           | -0.492           | -2.0817          | -0.4202          | O           | 2.4689           | 0.1788           | 0.0566           |
| C           | 0.2016           | -3.5037          | 1.2902           | C           | 2.8016           | 0.6425           | 2.3125           |
| C           | -1.3615          | -3.0976          | -3.0588          | C           | 4.7012           | 0.2087           | -1.8933          |
| C           | -1.005           | -3.9475          | -1.8453          | C           | 4.8265           | 0.3689           | -0.3831          |
| C           | -1.3782          | -3.2207          | -0.5474          | C           | 3.7447           | -0.442           | 0.3404           |
| C           | -2.9076          | -2.8661          | -0.4975          | C           | 3.8131           | -1.9657          | -0.0275          |
| C           | -3.3821          | -2.0846          | -1.7812          | C           | 3.7996           | -2.2058          | -1.5849          |
| C           | -2.8475          | -2.7612          | -3.0765          | C           | 4.8023           | -1.2561          | -2.3019          |

|   |         |         |         |   |         |         |         |
|---|---------|---------|---------|---|---------|---------|---------|
| C | -3.3188 | -2.1022 | 0.7885  | C | 2.7105  | -2.8096 | 0.6606  |
| C | -2.912  | -0.6186 | 0.8219  | C | 1.3048  | -2.667  | 0.0527  |
| C | -3.3865 | 0.1053  | -0.447  | C | 1.3257  | -2.8869 | -1.4677 |
| C | -2.9239 | -0.6053 | -1.7214 | C | 2.3731  | -2.0093 | -2.1592 |
| C | -3.363  | 0.0239  | 2.1226  | C | 0.3333  | -3.5549 | 0.8102  |
| C | -2.5096 | -0.2298 | 3.3235  | C | -0.3315 | -2.9573 | 2.0054  |
| C | -4.4203 | 0.8312  | 2.3049  | C | 0.0093  | -4.8239 | 0.5148  |
| O | -1.4971 | -0.9197 | 3.2729  | O | -0.1892 | -1.7809 | 2.3203  |
| C | -4.9341 | -2.1031 | -1.9178 | C | 4.2675  | -3.6478 | -1.9426 |
| C | -0.9704 | -4.0623 | 0.6406  | C | 3.8609  | -0.2273 | 1.8319  |
| O | -1.5296 | -5.0792 | 1.0281  | O | 4.7141  | -0.7096 | 2.5643  |
| C | -2.6426 | 4.6376  | 1.5141  | C | -4.7808 | -3.241  | 1.5641  |
| C | -1.5818 | 3.6033  | 1.2136  | C | -3.8243 | -2.1072 | 1.2688  |
| C | -1.0488 | 3.4084  | -0.0182 | C | -3.4091 | -1.7813 | 0.0194  |
| C | -1.4421 | 4.3042  | -1.2122 | C | -3.955  | -2.5181 | -1.2232 |
| C | -2.2246 | 5.5693  | -0.7637 | C | -5.1907 | -3.3994 | -0.89   |
| C | -0.0429 | 2.3191  | -0.3724 | C | -2.3999 | -0.6858 | -0.3088 |
| C | 1.2139  | 2.88    | -1.0595 | C | -2.9526 | 0.3218  | -1.3322 |
| C | 0.8201  | 3.6925  | -2.3031 | C | -3.3847 | -0.4105 | -2.6117 |
| C | -0.1657 | 4.8029  | -1.9415 | C | -4.4148 | -1.4944 | -2.296  |
| C | 2.2134  | 1.7803  | -1.337  | C | -1.984  | 1.4577  | -1.5695 |
| C | 2.5856  | 1.2885  | -2.5176 | C | -1.3411 | 1.7733  | -2.6926 |
| O | 2.8442  | 1.2527  | -0.2073 | O | -1.7943 | 2.3078  | -0.478  |
| C | -2.3274 | 3.5056  | -2.1979 | C | -2.8521 | -3.4272 | -1.8111 |
| C | -1.1882 | 2.8088  | 2.4209  | C | -3.3839 | -1.389  | 2.5099  |
| O | -1.7727 | 2.9092  | 3.4957  | O | -3.7702 | -1.7209 | 3.6267  |
| O | -3.6547 | -4.1087 | -0.4923 | O | 5.0812  | -2.4852 | 0.4447  |
| C | -3.2857 | 5.2491  | 0.2762  | C | -5.0017 | -4.1897 | 0.3935  |
| H | 6.5056  | 1.9337  | 1.1052  | H | -3.4158 | 5.8401  | 0.1301  |
| H | 4.7939  | 2.0033  | 1.4867  | H | -3.2325 | 4.2022  | 0.7329  |
| H | 5.1538  | 2.2251  | -0.928  | H | -3.0256 | 4.2523  | -1.7084 |
| H | 6.075   | 0.7285  | -0.991  | H | -1.7536 | 5.4641  | -1.6405 |
| H | 5.8712  | 0.2005  | 2.757   | H | -1.9657 | 5.7558  | 2.1408  |
| H | 6.5691  | -0.4623 | 1.2917  | H | -1.173  | 6.4416  | 0.7356  |
| H | 2.3796  | -1.7921 | -1.1956 | H | 1.4475  | 2.4559  | -0.8909 |
| H | 2.9605  | -2.8707 | 0.0181  | H | 2.1108  | 3.365   | 0.4144  |
| H | 1.1762  | -0.4315 | 0.4499  | H | 0.0693  | 1.1034  | 0.6227  |
| H | 1.1946  | -0.7785 | 2.8126  | H | -0.1005 | 1.4309  | 2.9916  |
| H | 2.1848  | -2.2151 | 2.7025  | H | 1.1026  | 2.7029  | 3.0037  |
| H | 3.554   | -0.3737 | 3.4363  | H | -1.0715 | 3.6992  | 3.2245  |
| H | 3.0104  | 0.6532  | 2.138   | H | -1.7063 | 2.8248  | 1.8599  |
| H | 5.7882  | -2.6447 | 1.5583  | H | 1.0269  | 6.1889  | 1.4725  |
| H | 5.1196  | -2.2161 | 3.1309  | H | 0.4273  | 5.6104  | 3.025   |
| H | 4.1189  | -3.0493 | 1.9414  | H | 1.6641  | 4.6992  | 2.1598  |
| H | 4.873   | -1.7447 | -1.6313 | H | 0.9703  | 4.7837  | -1.6668 |
| H | 0.7342  | -3.9466 | 2.1091  | H | 2.7053  | 1.0113  | 3.3151  |
| H | -0.7637 | -2.1793 | -3.0706 | H | 3.7557  | 0.6371  | -2.2446 |

|             |                  |                  |                  |             |                  |                  |                  |
|-------------|------------------|------------------|------------------|-------------|------------------|------------------|------------------|
| H           | -1.1042          | -3.6461          | -3.9725          | H           | 5.4998           | 0.7768           | -2.3846          |
| H           | -1.5131          | -4.918           | -1.9063          | H           | 5.8266           | 0.0576           | -0.0566          |
| H           | 0.0723           | -4.1558          | -1.8754          | H           | 4.7364           | 1.4358           | -0.1416          |
| H           | -3.3951          | -3.6977          | -3.2508          | H           | 5.8292           | -1.5868          | -2.0943          |
| H           | -3.0571          | -2.1241          | -3.9455          | H           | 4.6761           | -1.3308          | -3.3897          |
| H           | -4.4084          | -2.1783          | 0.914            | H           | 3.009            | -3.8674          | 0.6363           |
| H           | -2.9242          | -2.6249          | 1.6687           | H           | 2.68             | -2.5771          | 1.733            |
| H           | -1.8203          | -0.5415          | 0.8107           | H           | 0.9593           | -1.6383          | 0.1872           |
| H           | -4.4777          | 0.1978           | -0.4637          | H           | 1.5161           | -3.9364          | -1.7151          |
| H           | -2.9977          | 1.1284           | -0.4498          | H           | 0.3405           | -2.6514          | -1.8864          |
| H           | -3.3156          | -0.0564          | -2.5877          | H           | 2.3671           | -2.2413          | -3.2323          |
| H           | -1.8346          | -0.528           | -1.7952          | H           | 2.06             | -0.9629          | -2.0863          |
| H           | -2.8379          | 0.2464           | 4.2631           | H           | -0.9776          | -3.6345          | 2.5898           |
| H           | -4.6515          | 1.2735           | 3.2709           | H           | -0.6993          | -5.398           | 1.1056           |
| H           | -5.0963          | 1.0879           | 1.4967           | H           | 0.4535           | -5.3448          | -0.3274          |
| H           | -5.4426          | -1.7152          | -1.0313          | H           | 3.6774           | -4.4207          | -1.4431          |
| H           | -5.2559          | -1.4954          | -2.7719          | H           | 4.1907           | -3.8243          | -3.0221          |
| H           | -5.3145          | -3.1168          | -2.0866          | H           | 5.3146           | -3.815           | -1.6661          |
| H           | -3.4436          | 4.2009           | 2.123            | H           | -4.418           | -3.8375          | 2.4102           |
| H           | -2.184           | 5.4359           | 2.1118           | H           | -5.7445          | -2.8094          | 1.8642           |
| H           | -1.5361          | 6.309            | -0.3325          | H           | -6.0854          | -2.7719          | -0.7759          |
| H           | -2.6924          | 6.0567           | -1.6284          | H           | -5.4056          | -4.0873          | -1.7174          |
| H           | -0.5314          | 1.5918           | -1.033           | H           | -1.4886          | -1.1526          | -0.7025          |
| H           | 0.2641           | 1.7418           | 0.5003           | H           | -2.0777          | -0.1403          | 0.5791           |
| H           | 1.702            | 3.5758           | -0.3609          | H           | -3.8569          | 0.7779           | -0.9016          |
| H           | 1.7127           | 4.1463           | -2.7521          | H           | -3.8299          | 0.2999           | -3.3198          |
| H           | 0.3791           | 3.0445           | -3.0699          | H           | -2.5191          | -0.8558          | -3.1166          |
| H           | 0.3638           | 5.5258           | -1.3054          | H           | -5.3316          | -0.9925          | -1.9564          |
| H           | -0.4422          | 5.3451           | -2.855           | H           | -4.6792          | -2.0162          | -3.2248          |
| H           | 2.2667           | 1.5123           | -3.5172          | H           | -1.3173          | 1.3047           | -3.6574          |
| H           | -1.8206          | 2.6232           | -2.6006          | H           | -1.9868          | -2.8594          | -2.1628          |
| H           | -3.2486          | 3.1539           | -1.7224          | H           | -2.4858          | -4.1474          | -1.0729          |
| H           | -2.6172          | 4.1264           | -3.0538          | H           | -3.2284          | -3.9968          | -2.6688          |
| H           | -0.3418          | 2.1184           | 2.3163           | H           | -2.6998          | -0.5401          | 2.3887           |
| H           | -3.319           | -4.6713          | 0.2381           | H           | 5.1776           | -2.2592          | 1.3945           |
| H           | -4.0343          | 4.5628           | -0.1355          | H           | -4.1536          | -4.8777          | 0.3015           |
| H           | -3.8229          | 6.1627           | 0.5562           | H           | -5.8855          | -4.809           | 0.5857           |
| <b>3d-3</b> | <b>X axis(Å)</b> | <b>Y axis(Å)</b> | <b>Z axis(Å)</b> | <b>3d-4</b> | <b>X axis(Å)</b> | <b>Y axis(Å)</b> | <b>Z axis(Å)</b> |
| C           | 2.4159           | 4.0714           | -1.5176          | C           | -1.2246          | 5.5713           | -0.1763          |
| C           | 2.1778           | 3.8571           | -0.0274          | C           | -0.9514          | 4.8531           | 1.1386           |
| C           | 1.2814           | 2.6352           | 0.2098           | C           | -1.1926          | 3.3436           | 1.0032           |
| C           | -0.0979          | 2.7787           | -0.5245          | C           | -2.6505          | 3.0224           | 0.5238           |
| C           | 0.0678           | 3.1047           | -2.0564          | C           | -3.0277          | 3.8114           | -0.7863          |
| C           | 1.1013           | 4.2482           | -2.2689          | C           | -2.647           | 5.3143           | -0.6583          |
| C           | -1.0232          | 1.5537           | -0.3355          | C           | -2.918           | 1.5079           | 0.3336           |
| C           | -0.6406          | 0.3138           | -1.1585          | C           | -2.2915          | 0.8786           | -0.9255          |
| C           | -0.4481          | 0.6525           | -2.6405          | C           | -2.6152          | 1.697            | -2.1856          |

|   |         |         |         |   |         |         |         |
|---|---------|---------|---------|---|---------|---------|---------|
| C | 0.4963  | 1.8404  | -2.8452 | C | -2.326  | 3.1893  | -2.0198 |
| C | -1.2629 | 3.6261  | -2.6753 | C | -4.5634 | 3.7926  | -1.0411 |
| C | 1.1057  | 2.4139  | 1.6985  | C | -0.8537 | 2.6706  | 2.313   |
| O | 0.3953  | 3.0685  | 2.4497  | O | -1.5388 | 2.67    | 3.3262  |
| O | -0.7915 | 3.9124  | 0.0551  | O | -3.5671 | 3.4787  | 1.5485  |
| C | -1.6309 | -0.8128 | -0.9916 | C | -2.6859 | -0.5806 | -1.0246 |
| O | -2.9851 | -0.4942 | -1.0778 | O | -2.3104 | -1.372  | 0.0646  |
| C | -1.3139 | -2.0803 | -0.7356 | C | -3.2967 | -1.1959 | -2.0359 |
| C | -5.4121 | -1.028  | -2.6796 | C | -3.465  | -3.0649 | 2.2227  |
| C | -4.328  | -2.041  | -2.3322 | C | -3.9672 | -2.9632 | 0.7884  |
| C | -3.7208 | -1.7352 | -0.9581 | C | -2.8087 | -2.7062 | -0.182  |
| C | -4.811  | -1.7359 | 0.1748  | C | -1.7017 | -3.8152 | -0.0901 |
| C | -6.0201 | -0.7854 | -0.1664 | C | -1.2132 | -4.0458 | 1.3909  |
| C | -6.5123 | -1.0137 | -1.6251 | C | -2.4222 | -4.1671 | 2.3625  |
| C | -4.2462 | -1.4077 | 1.5825  | C | -0.4902 | -3.5509 | -1.0236 |
| C | -3.905  | 0.074   | 1.8174  | C | 0.4855  | -2.4608 | -0.5424 |
| C | -5.0878 | 0.9846  | 1.4461  | C | 0.9161  | -2.6936 | 0.9139  |
| C | -5.6233 | 0.6989  | 0.0398  | C | -0.2791 | -2.8964 | 1.8472  |
| C | -3.3551 | 0.2838  | 3.2188  | C | 1.6367  | -2.3226 | -1.5242 |
| C | -1.9223 | -0.0763 | 3.449   | C | 1.4294  | -1.4089 | -2.6864 |
| C | -4.0109 | 0.7962  | 4.273   | C | 2.8327  | -2.9281 | -1.4496 |
| O | -1.2042 | -0.5591 | 2.58    | O | 0.3994  | -0.7656 | -2.8504 |
| C | -7.2536 | -1.0848 | 0.7364  | C | -0.4331 | -5.3863 | 1.5303  |
| C | -2.6141 | -2.7228 | -0.661  | C | -3.3541 | -2.5753 | -1.5855 |
| O | -2.7589 | -3.9047 | -0.3796 | O | -3.7759 | -3.4882 | -2.2825 |
| C | 7.8825  | -2.257  | 0.2683  | C | 6.1597  | -1.0902 | -0.0974 |
| C | 6.9352  | -1.0945 | 0.4592  | C | 4.92    | -0.6315 | 0.6341  |
| C | 5.6396  | -1.1047 | 0.0585  | C | 4.3258  | 0.5718  | 0.4396  |
| C | 5.0218  | -2.3478 | -0.6188 | C | 4.9028  | 1.5885  | -0.5647 |
| C | 5.9198  | -3.6074 | -0.4715 | C | 5.944   | 0.9459  | -1.5229 |
| C | 4.6675  | 0.0599  | 0.208   | C | 3.0742  | 1.0528  | 1.1663  |
| C | 3.3497  | -0.3544 | 0.8891  | C | 1.981   | 1.6064  | 0.2245  |
| C | 2.6942  | -1.5186 | 0.1406  | C | 2.5732  | 2.6947  | -0.6848 |
| C | 3.6554  | -2.6997 | 0.0294  | C | 3.7787  | 2.1687  | -1.4582 |
| C | 2.4095  | 0.8175  | 1.0109  | C | 0.7502  | 2.1244  | 0.9426  |
| C | 1.9049  | 1.2867  | 2.1497  | C | 0.4302  | 1.9905  | 2.2287  |
| O | 2.0384  | 1.4597  | -0.1703 | O | -0.1686 | 2.803   | 0.1384  |
| C | 4.8269  | -2.0559 | -2.126  | C | 5.5914  | 2.7303  | 0.22    |
| C | 7.5876  | 0.0817  | 1.1169  | C | 4.4302  | -1.6363 | 1.6272  |
| O | 8.7243  | 0.0364  | 1.5757  | O | 4.7879  | -2.8091 | 1.6082  |
| O | -5.3653 | -3.0731 | 0.2605  | O | -2.2864 | -5.0702 | -0.5173 |
| C | 7.3872  | -3.3031 | -0.7215 | C | 6.9158  | 0.0328  | -0.7942 |
| H | 3.0358  | 4.9644  | -1.6596 | H | -1.0793 | 6.649   | -0.0369 |
| H | 2.9826  | 3.2322  | -1.9366 | H | -0.5014 | 5.2584  | -0.9377 |
| H | 3.1517  | 3.7227  | 0.4607  | H | 0.0877  | 5.0545  | 1.4298  |
| H | 1.7296  | 4.757   | 0.4121  | H | -1.5844 | 5.2741  | 1.9299  |
| H | 1.3167  | 4.3642  | -3.3389 | H | -2.7921 | 5.8209  | -1.6212 |



|   |         |         |         |   |         |         |         |
|---|---------|---------|---------|---|---------|---------|---------|
| H | 0.6613  | 5.2014  | -1.9451 | H | -3.3313 | 5.8053  | 0.0471  |
| H | -1.0654 | 1.292   | 0.7266  | H | -2.5856 | 0.9655  | 1.2284  |
| H | -2.0526 | 1.8547  | -0.5733 | H | -4.0039 | 1.337   | 0.3191  |
| H | 0.3161  | -0.0572 | -0.7849 | H | -1.2026 | 0.8752  | -0.8152 |
| H | -0.0364 | -0.2176 | -3.1682 | H | -2.0256 | 1.3194  | -3.0311 |
| H | -1.4152 | 0.8591  | -3.115  | H | -3.6667 | 1.5665  | -2.4681 |
| H | 0.5416  | 2.0673  | -3.9184 | H | -2.6481 | 3.7084  | -2.9322 |
| H | 1.5104  | 1.533   | -2.5706 | H | -1.2424 | 3.3335  | -1.9741 |
| H | -1.5715 | 4.5788  | -2.2304 | H | -5.1121 | 4.3133  | -0.2483 |
| H | -1.1482 | 3.7991  | -3.7521 | H | -4.8067 | 4.2982  | -1.9832 |
| H | -2.0931 | 2.9269  | -2.5451 | H | -4.9707 | 2.78    | -1.1016 |
| H | -0.8489 | 3.7788  | 1.0246  | H | -3.3107 | 3.0693  | 2.4016  |
| H | -0.362  | -2.5547 | -0.5997 | H | -3.6463 | -0.8319 | -2.9825 |
| H | -4.978  | -0.0277 | -2.7887 | H | -3.0513 | -2.1045 | 2.5501  |
| H | -5.8475 | -1.2838 | -3.6527 | H | -4.3099 | -3.2803 | 2.8873  |
| H | -4.7442 | -3.0559 | -2.3552 | H | -4.5013 | -3.8823 | 0.5163  |
| H | -3.5564 | -2.0013 | -3.112  | H | -4.7005 | -2.148  | 0.7374  |
| H | -7.0391 | -1.9761 | -1.685  | H | -2.9294 | -5.1273 | 2.1958  |
| H | -7.252  | -0.2487 | -1.8944 | H | -2.0673 | -4.19   | 3.4009  |
| H | -4.9701 | -1.7341 | 2.3425  | H | 0.0613  | -4.492  | -1.1604 |
| H | -3.3687 | -2.036  | 1.7804  | H | -0.8474 | -3.3141 | -2.0341 |
| H | -3.101  | 0.3581  | 1.1388  | H | -0.0287 | -1.496  | -0.536  |
| H | -5.9064 | 0.8769  | 2.1658  | H | 1.585   | -3.5562 | 0.9985  |
| H | -4.7731 | 2.0349  | 1.497   | H | 1.4888  | -1.8283 | 1.2652  |
| H | -6.4926 | 1.3454  | -0.1386 | H | 0.0999  | -3.1016 | 2.857   |
| H | -4.8738 | 1.0123  | -0.6935 | H | -0.8255 | -1.9516 | 1.9292  |
| H | -1.5352 | 0.1167  | 4.464   | H | 2.2685  | -1.3365 | -3.399  |
| H | -3.5422 | 0.9316  | 5.2439  | H | 3.6142  | -2.7772 | -2.1888 |
| H | -5.0513 | 1.0978  | 4.2104  | H | 3.0804  | -3.6145 | -0.6446 |
| H | -7.0253 | -1.017  | 1.8031  | H | 0.416   | -5.4554 | 0.8452  |
| H | -8.0656 | -0.3771 | 0.5308  | H | -0.0421 | -5.504  | 2.548   |
| H | -7.6532 | -2.0894 | 0.5572  | H | -1.0756 | -6.2519 | 1.3336  |
| H | 8.8591  | -1.9022 | -0.0835 | H | 6.8533  | -1.5814 | 0.5963  |
| H | 8.046   | -2.732  | 1.2443  | H | 5.865   | -1.8418 | -0.8408 |
| H | 5.8262  | -4.0232 | 0.5413  | H | 5.4329  | 0.3528  | -2.2939 |
| H | 5.5866  | -4.3973 | -1.1564 | H | 6.5027  | 1.7242  | -2.0578 |
| H | 4.4683  | 0.4711  | -0.7901 | H | 3.3736  | 1.8258  | 1.8861  |
| H | 5.0889  | 0.887   | 0.7831  | H | 2.622   | 0.253   | 1.7559  |
| H | 3.5952  | -0.7048 | 1.9026  | H | 1.6425  | 0.781   | -0.4172 |
| H | 1.7909  | -1.8427 | 0.6723  | H | 1.8253  | 3.0328  | -1.4133 |
| H | 2.3727  | -1.2085 | -0.8603 | H | 2.8507  | 3.5781  | -0.097  |
| H | 3.8189  | -3.0933 | 1.0423  | H | 3.4193  | 1.3933  | -2.1493 |
| H | 3.1672  | -3.504  | -0.536  | H | 4.1776  | 2.9759  | -2.0862 |
| H | 2.023   | 0.9547  | 3.1629  | H | 0.9297  | 1.505   | 3.0444  |
| H | 4.1295  | -1.2322 | -2.3076 | H | 4.8935  | 3.2796  | 0.8596  |
| H | 5.7707  | -1.7838 | -2.611  | H | 6.3859  | 2.3522  | 0.8726  |
| H | 4.4278  | -2.9338 | -2.647  | H | 6.043   | 3.4589  | -0.4633 |

|             |                  |                  |                  |             |                  |                  |                  |
|-------------|------------------|------------------|------------------|-------------|------------------|------------------|------------------|
| H           | 7.0062           | 1.0097           | 1.1773           | H           | 3.7262           | -1.2801          | 2.3909           |
| H           | -4.6277          | -3.7106          | 0.3663           | H           | -2.7084          | -4.9387          | -1.3927          |
| H           | 7.5376           | -2.9507          | -1.7483          | H           | 7.5033           | 0.6006           | -0.0638          |
| H           | 7.9823           | -4.2177          | -0.6161          | H           | 7.6326           | -0.3943          | -1.5051          |
| <b>3d-5</b> | <b>X axis(Å)</b> | <b>Y axis(Å)</b> | <b>Z axis(Å)</b> | <b>3d-6</b> | <b>X axis(Å)</b> | <b>Y axis(Å)</b> | <b>Z axis(Å)</b> |
| C           | 5.4819           | 0.2917           | 1.8185           | C           | 5.6172           | 1.0227           | 0.9867           |
| C           | 5.4999           | 0.6249           | 0.3314           | C           | 5.2715           | 0.9019           | -0.4917          |
| C           | 4.2029           | 0.1651           | -0.3463          | C           | 3.9261           | 0.187            | -0.6849          |
| C           | 3.9667           | -1.3762          | -0.1619          | C           | 3.9248           | -1.2379          | -0.032           |
| C           | 4.0241           | -1.8051          | 1.3531           | C           | 4.3724           | -1.1978          | 1.4776           |
| C           | 5.2774           | -1.201           | 2.0501           | C           | 5.6623           | -0.3462          | 1.6535           |
| C           | 2.6586           | -1.8931          | -0.8129          | C           | 2.5753           | -1.9852          | -0.1754          |
| C           | 1.3706           | -1.5339          | -0.0535          | C           | 1.4527           | -1.5253          | 0.7715           |
| C           | 1.4532           | -1.8815          | 1.4363           | C           | 1.9281           | -1.4112          | 2.2279           |
| C           | 2.7354           | -1.3684          | 2.0959           | C           | 3.2365           | -0.6323          | 2.3667           |
| C           | 4.1672           | -3.3479          | 1.5059           | C           | 4.7393           | -2.6176          | 2.0012           |
| C           | 4.2257           | 0.5611           | -1.8048          | C           | 3.5982           | 0.1399           | -2.1601          |
| O           | 4.8694           | 0.0174           | -2.6913          | O           | 4.0731           | -0.6292          | -2.984           |
| O           | 5.0522           | -2.0739          | -0.821           | O           | 4.9133           | -2.0422          | -0.7224          |
| C           | 0.1393           | -2.1331          | -0.691           | C           | 0.2575           | -2.4371          | 0.5945           |
| O           | -0.9213          | -1.2505          | -0.9091          | O           | -0.6437          | -2.0683          | -0.4093          |
| C           | -0.0311          | -3.3977          | -1.0738          | C           | -0.0261          | -3.5371          | 1.2908           |
| C           | -2.3462          | 0.0166           | -3.1663          | C           | -1.5959          | -3.0267          | -3.0442          |
| C           | -1.8554          | -1.4245          | -3.1172          | C           | -1.2814          | -3.8968          | -1.8336          |
| C           | -1.9129          | -1.9677          | -1.6832          | C           | -1.6             | -3.1499          | -0.5326          |
| C           | -3.3674          | -1.8998          | -1.0951          | C           | -3.1045          | -2.702           | -0.4703          |
| C           | -3.9928          | -0.458           | -1.2161          | C           | -3.5425          | -1.8955          | -1.7519          |
| C           | -3.7709          | 0.131            | -2.6392          | C           | -3.0597          | -2.6038          | -3.0505          |
| C           | -3.4665          | -2.4126          | 0.3653           | C           | -3.4567          | -1.9121          | 0.8179           |
| C           | -2.9165          | -1.4503          | 1.4356           | C           | -2.9635          | -0.4545          | 0.8432           |
| C           | -3.5396          | -0.0534          | 1.2767           | C           | -3.4085          | 0.2926           | -0.4229          |
| C           | -3.3922          | 0.4888           | -0.1465          | C           | -2.997           | -0.4461          | -1.6987          |
| C           | -3.0636          | -2.0543          | 2.8235           | C           | -3.363           | 0.2174           | 2.146            |
| C           | -2.12            | -3.1557          | 3.1812           | C           | -2.5126          | -0.0789          | 3.3389           |
| C           | -3.9237          | -1.6802          | 3.7847           | C           | -4.3702          | 1.0848           | 2.3359           |
| O           | -1.2654          | -3.5737          | 2.4086           | O           | -1.5385          | -0.8214          | 3.2799           |
| C           | -5.5379          | -0.4887          | -1.0201          | C           | -5.094           | -1.8225          | -1.8757          |
| C           | -1.3609          | -3.376           | -1.6586          | C           | -1.2368          | -4.0181          | 0.6508           |
| O           | -1.9274          | -4.3777          | -2.0737          | O           | -1.8566          | -4.9978          | 1.0422           |
| C           | -2.2654          | 4.3202           | 2.0717           | C           | -2.1166          | 4.9708           | 1.5081           |
| C           | -1.1968          | 3.3272           | 1.675            | C           | -1.3353          | 3.7213           | 1.1838           |
| C           | -0.5734          | 3.3369           | 0.4706           | C           | -0.9053          | 3.4253           | -0.0669          |
| C           | -0.8639          | 4.4323           | -0.5752          | C           | -1.2497          | 4.3195           | -1.2782          |
| C           | -1.6754          | 5.6147           | 0.0223           | C           | -2.1618          | 5.5256           | -0.916           |
| C           | 0.4477           | 2.3077           | 0.0069           | C           | 0.0133           | 2.2656           | -0.422           |
| C           | 1.7672           | 2.9454           | -0.4683          | C           | 1.3394           | 2.7898           | -1.0055          |
| C           | 1.4831           | 3.9784           | -1.5706          | C           | 1.0869           | 3.73             | -2.2002          |

|   |         |         |         |   |         |         |         |
|---|---------|---------|---------|---|---------|---------|---------|
| C | 0.4708  | 5.0247  | -1.1026 | C | 0.0916  | 4.8453  | -1.8542 |
| C | 2.7684  | 1.8796  | -0.8632 | C | 2.2776  | 1.6454  | -1.31   |
| C | 3.3487  | 1.6959  | -2.0479 | C | 2.6162  | 1.1567  | -2.5018 |
| O | 3.1279  | 0.9942  | 0.1564  | O | 2.8826  | 1.0621  | -0.1937 |
| C | -1.6709 | 3.8277  | -1.748  | C | -2.0146 | 3.5287  | -2.3686 |
| C | -0.9098 | 2.3239  | 2.7505  | C | -1.0395 | 2.8803  | 2.3853  |
| O | -1.5069 | 2.3148  | 3.8224  | O | -1.5876 | 3.0643  | 3.4681  |
| O | -4.2107 | -2.7677 | -1.8932 | O | -3.9263 | -3.8965 | -0.4562 |
| C | -2.8137 | 5.1383  | 0.9094  | C | -1.9    | 6.0711  | 0.4767  |
| H | 6.4323  | 0.6004  | 2.2696  | H | 6.5946  | 1.5081  | 1.0913  |
| H | 4.6985  | 0.8651  | 2.3267  | H | 4.8944  | 1.6705  | 1.4949  |
| H | 5.6291  | 1.7095  | 0.2235  | H | 5.2394  | 1.9121  | -0.9197 |
| H | 6.3713  | 0.1579  | -0.1445 | H | 6.0713  | 0.3659  | -1.0181 |
| H | 5.2321  | -1.3892 | 3.1306  | H | 5.8815  | -0.2141 | 2.7209  |
| H | 6.178   | -1.7183 | 1.6916  | H | 6.5194  | -0.8914 | 1.235   |
| H | 2.5869  | -1.5336 | -1.8478 | H | 2.2257  | -1.9271 | -1.2148 |
| H | 2.7352  | -2.9831 | -0.9236 | H | 2.7555  | -3.0598 | -0.0268 |
| H | 1.245   | -0.4524 | -0.1276 | H | 1.1273  | -0.5256 | 0.4683  |
| H | 0.5937  | -1.4484 | 1.9636  | H | 1.1565  | -0.9103 | 2.8253  |
| H | 1.3791  | -2.9662 | 1.5794  | H | 2.0584  | -2.4007 | 2.6795  |
| H | 2.7611  | -1.7311 | 3.132   | H | 3.5428  | -0.6541 | 3.4209  |
| H | 2.6764  | -0.2786 | 2.1746  | H | 3.0448  | 0.4215  | 2.1437  |
| H | 5.1085  | -3.7122 | 1.0794  | H | 5.613   | -3.0276 | 1.4821  |
| H | 4.1639  | -3.6345 | 2.5644  | H | 4.9879  | -2.5852 | 3.0687  |
| H | 3.3584  | -3.899  | 1.019   | H | 3.9266  | -3.3382 | 1.8781  |
| H | 5.1087  | -1.7628 | -1.7491 | H | 4.7151  | -2.0257 | -1.6826 |
| H | 0.6136  | -4.252  | -0.9986 | H | 0.4837  | -4.0155 | 2.1043  |
| H | -1.6756 | 0.6645  | -2.5922 | H | -0.9451 | -2.1452 | -3.0603 |
| H | -2.3132 | 0.376   | -4.2014 | H | -1.3783 | -3.5889 | -3.9599 |
| H | -2.4555 | -2.0474 | -3.7922 | H | -1.8475 | -4.8349 | -1.8907 |
| H | -0.8268 | -1.4504 | -3.4995 | H | -0.2189 | -4.1695 | -1.8724 |
| H | -4.4285 | -0.384  | -3.353  | H | -3.6627 | -3.5067 | -3.2189 |
| H | -4.073  | 1.1862  | -2.6589 | H | -3.2387 | -1.9564 | -3.9186 |
| H | -4.5181 | -2.6375 | 0.5934  | H | -4.5474 | -1.924  | 0.9548  |
| H | -2.9765 | -3.391  | 0.4395  | H | -3.0838 | -2.4548 | 1.6956  |
| H | -1.8416 | -1.316  | 1.2828  | H | -1.8693 | -0.4419 | 0.8203  |
| H | -4.6019 | -0.0672 | 1.5446  | H | -4.493  | 0.4454  | -0.4301 |
| H | -3.0627 | 0.6445  | 1.9733  | H | -2.9644 | 1.2929  | -0.4319 |
| H | -3.8833 | 1.4692  | -0.1968 | H | -3.3612 | 0.1234  | -2.5637 |
| H | -2.3337 | 0.6812  | -0.3435 | H | -1.9056 | -0.4343 | -1.7795 |
| H | -2.2326 | -3.5796 | 4.1935  | H | -2.8051 | 0.4166  | 4.2804  |
| H | -3.9507 | -2.154  | 4.7621  | H | -4.5655 | 1.5437  | 3.3021  |
| H | -4.6386 | -0.8774 | 3.6366  | H | -5.039  | 1.3767  | 1.5337  |
| H | -5.8368 | -0.9465 | -0.0737 | H | -5.5716 | -1.407  | -0.9846 |
| H | -5.9515 | 0.5267  | -1.0372 | H | -5.3865 | -1.1958 | -2.7266 |
| H | -6.0369 | -1.0497 | -1.8185 | H | -5.5348 | -2.812  | -2.0424 |
| H | -3.111  | 3.8048  | 2.5435  | H | -3.182  | 4.7174  | 1.5737  |

|             |                  |                  |                  |             |                  |                  |                  |
|-------------|------------------|------------------|------------------|-------------|------------------|------------------|------------------|
| H           | -1.8428          | 4.9998           | 2.8229           | H           | -1.8184          | 5.3728           | 2.4839           |
| H           | -1.0204          | 6.2597           | 0.6241           | H           | -2.0453          | 6.3294           | -1.6538          |
| H           | -2.0742          | 6.2497           | -0.7788          | H           | -3.2184          | 5.2264           | -0.9626          |
| H           | 0.0064           | 1.7191           | -0.8076          | H           | -0.4851          | 1.602            | -1.1377          |
| H           | 0.6759           | 1.5828           | 0.7882           | H           | 0.2312           | 1.6294           | 0.4365           |
| H           | 2.2079           | 3.4862           | 0.3822           | H           | 1.8307           | 3.3975           | -0.2305          |
| H           | 2.4117           | 4.4913           | -1.8516          | H           | 2.0328           | 4.1869           | -2.5177          |
| H           | 1.1116           | 3.486            | -2.4773          | H           | 0.7117           | 3.1687           | -3.0638          |
| H           | 0.9482           | 5.6178           | -0.3102          | H           | 0.5687           | 5.5207           | -1.1316          |
| H           | 0.2718           | 5.7209           | -1.9276          | H           | -0.0927          | 5.442            | -2.7569          |
| H           | 3.2483           | 2.2184           | -2.9797          | H           | 2.3043           | 1.415            | -3.4952          |
| H           | -1.1145          | 3.0546           | -2.2856          | H           | -1.4547          | 2.6774           | -2.7648          |
| H           | -2.6034          | 3.3682           | -1.4041          | H           | -2.9612          | 3.1372           | -1.9789          |
| H           | -1.9331          | 4.5986           | -2.4818          | H           | -2.2529          | 4.1765           | -3.2207          |
| H           | -0.1298          | 1.5794           | 2.5514           | H           | -0.3166          | 2.0637           | 2.264            |
| H           | -3.8046          | -3.6605          | -1.915           | H           | -3.619           | -4.4784          | 0.2715           |
| H           | -3.5273          | 4.5396           | 0.3319           | H           | -2.5776          | 6.9073           | 0.6835           |
| H           | -3.3711          | 5.9985           | 1.2979           | H           | -0.8786          | 6.4638           | 0.5476           |
| <b>3d-7</b> | <b>X axis(Å)</b> | <b>Y axis(Å)</b> | <b>Z axis(Å)</b> | <b>3d-8</b> | <b>X axis(Å)</b> | <b>Y axis(Å)</b> | <b>Z axis(Å)</b> |
| C           | 2.1697           | 4.827            | -1.3474          | C           | 1.7404           | 5.379            | -0.664           |
| C           | 1.8971           | 4.5666           | 0.1297           | C           | 1.7941           | 4.6854           | 0.6911           |
| C           | 1.1965           | 3.2162           | 0.3228           | C           | 1.135            | 3.3039           | 0.6284           |
| C           | -0.152           | 3.1452           | -0.4781          | C           | -0.3499          | 3.3754           | 0.1224           |
| C           | 0.0332           | 3.5042           | -2.0001          | C           | -0.4897          | 4.1814           | -1.2249          |
| C           | 0.8818           | 4.7982           | -2.1626          | C           | 0.3042           | 5.5172           | -1.1554          |
| C           | -0.8822          | 1.7889           | -0.3336          | C           | -1.0137          | 1.9803           | -0.0149          |
| C           | -0.2725          | 0.6299           | -1.1376          | C           | -0.58            | 1.1656           | -1.248           |
| C           | -0.0619          | 1.0057           | -2.608           | C           | -0.7061          | 1.9824           | -2.538           |
| C           | 0.6933           | 2.3287           | -2.766           | C           | -0.0025          | 3.3364           | -2.4292          |
| C           | -1.3318          | 3.8134           | -2.6834          | C           | -1.969           | 4.5885           | -1.4928          |
| C           | 0.9845           | 2.957            | 1.7985           | C           | 1.2263           | 2.6439           | 1.987            |
| O           | 0.1445           | 3.4854           | 2.5147           | O           | 0.5952           | 2.954            | 2.9885           |
| O           | -1.043           | 4.1514           | 0.0664           | O           | -1.1215          | 4.1101           | 1.1055           |
| C           | -1.0776          | -0.6416          | -1.0206          | C           | -1.3247          | -0.1405          | -1.3783          |
| O           | -2.463           | -0.5357          | -1.1299          | O           | -2.6905          | -0.1308          | -1.1054          |
| C           | -0.5719          | -1.8508          | -0.7857          | C           | -0.7731          | -1.3059          | -1.7113          |
| C           | -4.7521          | -1.4024          | -2.7897          | C           | -5.3267          | -0.5681          | -2.3628          |
| C           | -3.5289          | -2.2425          | -2.4424          | C           | -4.0588          | -1.3654          | -2.6451          |
| C           | -2.9992          | -1.8782          | -1.0509          | C           | -3.1884          | -1.4603          | -1.3869          |
| C           | -4.0937          | -2.0745          | 0.0607           | C           | -3.9608          | -2.1276          | -0.1922          |
| C           | -5.4306          | -1.3158          | -0.2842          | C           | -5.3361          | -1.4149          | 0.093            |
| C           | -5.8578          | -1.584           | -1.7566          | C           | -6.1299          | -1.1911          | -1.227           |
| C           | -3.6087          | -1.6947          | 1.4852           | C           | -3.1238          | -2.229           | 1.1103           |
| C           | -3.5066          | -0.1838          | 1.7558           | C           | -2.945           | -0.9066          | 1.8757           |
| C           | -4.8113          | 0.5398           | 1.3819           | C           | -4.2957          | -0.2079          | 2.1088           |
| C           | -5.2737          | 0.207            | -0.04            | C           | -5.1107          | -0.0642          | 0.8198           |
| C           | -3.0159          | 0.0771           | 3.1703           | C           | -2.1196          | -1.1289          | 3.1326           |

|   |         |         |         |   |         |         |         |
|---|---------|---------|---------|---|---------|---------|---------|
| C | -1.5464 | -0.0473 | 3.4163  | C | -0.6354 | -1.2042 | 2.9733  |
| C | -3.7611 | 0.4464  | 4.225   | C | -2.5817 | -1.2371 | 4.3892  |
| O | -0.7457 | -0.3805 | 2.5491  | O | -0.0658 | -1.0972 | 1.8923  |
| C | -6.6166 | -1.8243 | 0.5882  | C | -6.2605 | -2.2949 | 0.9858  |
| C | -1.7576 | -2.6886 | -0.7513 | C | -1.9121 | -2.2071 | -1.7039 |
| O | -1.7216 | -3.8841 | -0.4931 | O | -1.8148 | -3.4077 | -1.9168 |
| C | 5.8905  | -3.1523 | -1.3793 | C | 5.0594  | -4.1624 | -0.7307 |
| C | 4.816   | -2.0992 | -1.2279 | C | 4.1464  | -3.1539 | -0.07   |
| C | 4.3819  | -1.6342 | -0.0297 | C | 4.4811  | -1.8544 | 0.1262  |
| C | 4.9963  | -2.1361 | 1.2928  | C | 5.8297  | -1.2884 | -0.3666 |
| C | 6.3131  | -2.93   | 1.069   | C | 6.5445  | -2.2537 | -1.3518 |
| C | 3.2729  | -0.6072 | 0.161   | C | 3.6183  | -0.8288 | 0.8471  |
| C | 3.6862  | 0.578   | 1.0547  | C | 3.3948  | 0.4455  | 0.0098  |
| C | 4.2128  | 0.0637  | 2.4037  | C | 4.7409  | 1.063   | -0.388  |
| C | 5.3524  | -0.9343 | 2.2073  | C | 5.6096  | 0.0465  | -1.1291 |
| C | 2.5567  | 1.5801  | 1.1794  | C | 2.519   | 1.4784  | 0.6806  |
| C | 1.9232  | 1.961   | 2.2875  | C | 2.1528  | 1.5265  | 1.9598  |
| O | 2.1489  | 2.1785  | -0.0171 | O | 1.9767  | 2.4422  | -0.1731 |
| C | 3.9802  | -3.0596 | 2.0059  | C | 6.757   | -1.0491 | 0.8486  |
| C | 4.2692  | -1.6392 | -2.5446 | C | 2.8398  | -3.7493 | 0.3608  |
| O | 4.7231  | -2.0196 | -3.6188 | O | 2.5825  | -4.9408 | 0.2234  |
| O | -4.4344 | -3.483  | 0.1094  | O | -4.286  | -3.4878 | -0.5737 |
| C | 6.2087  | -3.9032 | -0.093  | C | 6.5025  | -3.6962 | -0.8757 |
| H | 2.6458  | 5.8082  | -1.4593 | H | 2.1899  | 6.3752  | -0.5779 |
| H | 2.882   | 4.0917  | -1.738  | H | 2.3431  | 4.8303  | -1.3962 |
| H | 2.8552  | 4.5851  | 0.665   | H | 2.846   | 4.5959  | 0.9914  |
| H | 1.2907  | 5.3805  | 0.5463  | H | 1.3042  | 5.312   | 1.447   |
| H | 1.1279  | 4.9541  | -3.2209 | H | 0.3114  | 6.0003  | -2.141  |
| H | 0.2811  | 5.6675  | -1.8618 | H | -0.2123 | 6.2144  | -0.4815 |
| H | -0.9318 | 1.5162  | 0.7253  | H | -0.8298 | 1.3978  | 0.8946  |
| H | -1.9339 | 1.9268  | -0.6193 | H | -2.104  | 2.1147  | -0.0248 |
| H | 0.71    | 0.4116  | -0.7156 | H | 0.475   | 0.9038  | -1.1357 |
| H | 0.5077  | 0.2151  | -3.1138 | H | -0.2644 | 1.4252  | -3.3745 |
| H | -1.0246 | 1.0609  | -3.1306 | H | -1.7614 | 2.1266  | -2.7997 |
| H | 0.7552  | 2.5677  | -3.8357 | H | -0.165  | 3.8889  | -3.3639 |
| H | 1.7282  | 2.1821  | -2.4411 | H | 1.0775  | 3.1655  | -2.3755 |
| H | -1.8081 | 4.7023  | -2.2547 | H | -2.3418 | 5.286   | -0.7344 |
| H | -1.1942 | 4.0097  | -3.7534 | H | -2.0638 | 5.0917  | -2.4625 |
| H | -2.0465 | 2.9911  | -2.5932 | H | -2.648  | 3.7317  | -1.5025 |
| H | -1.123  | 4.0058  | 1.0324  | H | -0.9812 | 3.7039  | 1.9861  |
| H | 0.4385  | -2.1776 | -0.6389 | H | 0.2416  | -1.565  | -1.9426 |
| H | -4.4775 | -0.3446 | -2.8696 | H | -5.0773 | 0.4721  | -2.1246 |
| H | -5.1268 | -1.6999 | -3.7761 | H | -5.9441 | -0.5383 | -3.2682 |
| H | -3.7815 | -3.3089 | -2.4944 | H | -4.3204 | -2.3655 | -3.0124 |
| H | -2.7606 | -2.0649 | -3.2059 | H | -3.5115 | -0.8671 | -3.4556 |
| H | -6.227  | -2.6149 | -1.8464 | H | -6.5166 | -2.1546 | -1.5867 |
| H | -6.7033 | -0.9373 | -2.0245 | H | -7.0116 | -0.567  | -1.0321 |

|             |                  |                  |                  |              |                  |                  |                  |
|-------------|------------------|------------------|------------------|--------------|------------------|------------------|------------------|
| H           | -4.2845          | -2.147           | 2.2248           | H            | -3.59            | -2.9692          | 1.776            |
| H           | -2.6469          | -2.1827          | 1.6873           | H            | -2.145           | -2.671           | 0.8847           |
| H           | -2.7477          | 0.2372           | 1.0971           | H            | -2.3679          | -0.2193          | 1.2566           |
| H           | -5.614           | 0.2891           | 2.0837           | H            | -4.8964          | -0.7505          | 2.8464           |
| H           | -4.6653          | 1.6248           | 1.4604           | H            | -4.1242          | 0.7906           | 2.5312           |
| H           | -6.2302          | 0.7143           | -0.2217          | H            | -6.0784          | 0.3901           | 1.0701           |
| H           | -4.5707          | 0.6501           | -0.7523          | H            | -4.6129          | 0.6582           | 0.1659           |
| H           | -1.2105          | 0.1793           | 4.4425           | H            | -0.0615          | -1.3633          | 3.9022           |
| H           | -3.3343          | 0.6323           | 5.2067           | H            | -1.927           | -1.3828          | 5.244            |
| H           | -4.8363          | 0.5731           | 4.1513           | H            | -3.6418          | -1.1925          | 4.6166           |
| H           | -6.4184          | -1.7468          | 1.6604           | H            | -5.7928          | -2.5768          | 1.9327           |
| H           | -7.5255          | -1.2467          | 0.3818           | H            | -7.1887          | -1.7627          | 1.226            |
| H           | -6.852           | -2.8742          | 0.3806           | H            | -6.5472          | -3.2241          | 0.4806           |
| H           | 5.5976           | -3.8935          | -2.133           | H            | 5.0696           | -5.1013          | -0.1637          |
| H           | 6.8022           | -2.6636          | -1.7466          | H            | 4.6543           | -4.3922          | -1.7248          |
| H           | 7.142            | -2.2393          | 0.8614           | H            | 6.0685           | -2.2071          | -2.3411          |
| H           | 6.5918           | -3.4741          | 1.9802           | H            | 7.5871           | -1.9461          | -1.5009          |
| H           | 2.4015           | -1.1126          | 0.5964           | H            | 4.1104           | -0.5781          | 1.7957           |
| H           | 2.9298           | -0.2041          | -0.7921          | H            | 2.642            | -1.227           | 1.126            |
| H           | 4.5156           | 1.1031           | 0.5585           | H            | 2.8748           | 0.1393           | -0.9099          |
| H           | 4.5826           | 0.9033           | 3.006            | H            | 4.582            | 1.9306           | -1.0411          |
| H           | 3.4081           | -0.4054          | 2.9824           | H            | 5.269            | 1.4372           | 0.4975           |
| H           | 6.2049           | -0.3871          | 1.7813           | H            | 5.1273           | -0.1585          | -2.0951          |
| H           | 5.6817           | -1.2957          | 3.1901           | H            | 6.5771           | 0.5089           | -1.3635          |
| H           | 2.0304           | 1.6537           | 3.3096           | H            | 2.3886           | 0.8916           | 2.7915           |
| H           | 3.0561           | -2.5392          | 2.2762           | H            | 6.3629           | -0.2932          | 1.535            |
| H           | 3.6919           | -3.9076          | 1.375            | H            | 6.9023           | -1.9637          | 1.4338           |
| H           | 4.4022           | -3.4646          | 2.933            | H            | 7.7452           | -0.7019          | 0.5254           |
| H           | 3.4299           | -0.9338          | -2.523           | H            | 2.1004           | -3.0741          | 0.8089           |
| H           | -3.6082          | -4.0013          | 0.2112           | H            | -3.463           | -3.9378          | -0.8608          |
| H           | 5.4372           | -4.6563          | 0.1037           | H            | 7.029            | -3.8011          | 0.0798           |
| H           | 7.1526           | -4.448           | -0.2109          | H            | 7.0255           | -4.3417          | -1.591           |
| <b>3d-9</b> | <b>X axis(Å)</b> | <b>Y axis(Å)</b> | <b>Z axis(Å)</b> | <b>3d-10</b> | <b>X axis(Å)</b> | <b>Y axis(Å)</b> | <b>Z axis(Å)</b> |
| C           | 1.4665           | 5.5072           | -0.3819          | C            | 2.7939           | 4.4943           | -0.6672          |
| C           | 1.3594           | 4.782            | 0.9541           | C            | 2.4235           | 4.1113           | 0.7606           |
| C           | 0.509            | 3.5107           | 0.8166           | C            | 1.2231           | 3.155            | 0.7721           |
| C           | -0.9309          | 3.8349           | 0.2935           | C            | -0.0274          | 3.7876           | 0.0706           |
| C           | -0.8978          | 4.6638           | -1.0434          | C            | 0.3058           | 4.2949           | -1.3819          |
| C           | 0.0895           | 5.8614           | -0.9301          | C            | 1.6155           | 5.1356           | -1.3901          |
| C           | -1.8307          | 2.587            | 0.1299           | C            | -1.2645          | 2.8569           | 0.0461           |
| C           | -1.5415          | 1.6996           | -1.0965          | C            | -1.2188          | 1.7103           | -0.9799          |
| C           | -1.4144          | 2.5336           | -2.383           | C            | -0.8153          | 2.209            | -2.3767          |
| C           | -0.5031          | 3.7536           | -2.2339          | C            | 0.4298           | 3.0986           | -2.3598          |
| C           | -2.2842          | 5.2997           | -1.3561          | C            | -0.8006          | 5.2492           | -1.9206          |
| C           | 0.491            | 2.7692           | 2.1337           | C            | 0.9257           | 2.732            | 2.1945           |
| O           | -0.183           | 3.053            | 3.1141           | O            | 0.3648           | 3.4058           | 3.0472           |
| O           | -1.5803          | 4.6773           | 1.2783           | O            | -0.4143          | 4.9599           | 0.8299           |

|   |         |         |         |   |         |         |         |
|---|---------|---------|---------|---|---------|---------|---------|
| C | -2.6074 | 0.6208  | -1.1741 | C | -2.5426 | 0.9741  | -0.9451 |
| O | -2.6773 | -0.2265 | -0.064  | O | -2.7681 | 0.2104  | 0.2048  |
| C | -3.4847 | 0.3946  | -2.1511 | C | -3.4971 | 0.9601  | -1.8744 |
| C | -4.515  | -0.5641 | 2.2295  | C | -4.5301 | 0.1909  | 2.5783  |
| C | -4.9281 | -0.3443 | 0.7789  | C | -4.9508 | 0.5386  | 1.1554  |
| C | -3.9084 | -0.9776 | -0.1781 | C | -4.133  | -0.2658 | 0.1377  |
| C | -3.753  | -2.515  | 0.083   | C | -4.289  | -1.8125 | 0.3577  |
| C | -3.4085 | -2.8243 | 1.5883  | C | -3.9749 | -2.2369 | 1.8425  |
| C | -4.361  | -2.0478 | 2.5434  | C | -4.6961 | -1.2988 | 2.8535  |
| C | -2.7331 | -3.2124 | -0.8511 | C | -3.4559 | -2.6619 | -0.6362 |
| C | -1.2548 | -2.9224 | -0.5342 | C | -1.9456 | -2.7042 | -0.3476 |
| C | -0.9349 | -3.1446 | 0.9519  | C | -1.6705 | -3.1045 | 1.1115  |
| C | -1.9323 | -2.4659 | 1.8941  | C | -2.4462 | -2.2318 | 2.1029  |
| C | -0.2763 | -3.7017 | -1.399  | C | -1.2418 | -3.5607 | -1.3864 |
| C | 1.0175  | -3.0368 | -1.726  | C | -0.9204 | -2.9037 | -2.6893 |
| C | -0.4538 | -4.9297 | -1.9134 | C | -0.8535 | -4.839  | -1.2505 |
| O | 1.3012  | -1.9129 | -1.3266 | O | -1.1692 | -1.7258 | -2.9177 |
| C | -3.6177 | -4.3292 | 1.9281  | C | -4.5114 | -3.6663 | 2.1518  |
| C | -4.2981 | -0.682  | -1.6075 | C | -4.527  | 0.1367  | -1.2648 |
| O | -5.1734 | -1.2464 | -2.2491 | O | -5.5618 | -0.1748 | -1.8387 |
| C | 5.4351  | -3.4553 | -0.4143 | C | 6.5315  | -3.0852 | 0.2058  |
| C | 4.3479  | -2.6387 | 0.2414  | C | 5.8462  | -1.8003 | 0.6112  |
| C | 4.3995  | -1.2926 | 0.3948  | C | 4.6552  | -1.3904 | 0.1086  |
| C | 5.608   | -0.48   | -0.1111 | C | 3.8879  | -2.2429 | -0.9248 |
| C | 6.5262  | -1.3068 | -1.0546 | C | 4.4535  | -3.6859 | -1.0369 |
| C | 3.3102  | -0.4473 | 1.0491  | C | 3.9517  | -0.0885 | 0.4739  |
| C | 2.8628  | 0.7515  | 0.1861  | C | 2.4887  | -0.3075 | 0.9025  |
| C | 4.0778  | 1.599   | -0.2199 | C | 1.7141  | -1.0592 | -0.1831 |
| C | 5.1312  | 0.7499  | -0.9253 | C | 2.397   | -2.3828 | -0.5163 |
| C | 1.8292  | 1.6443  | 0.838   | C | 1.829   | 1.0049  | 1.237   |
| C | 1.4129  | 1.6432  | 2.1034  | C | 1.4029  | 1.3799  | 2.441   |
| O | 1.2402  | 2.5819  | -0.0144 | O | 1.6579  | 1.905   | 0.1878  |
| C | 6.4441  | -0.0147 | 1.1045  | C | 3.9886  | -1.5655 | -2.3125 |
| C | 3.2045  | -3.4721 | 0.7229  | C | 6.6364  | -1.0136 | 1.6103  |
| O | 3.0343  | -4.632  | 0.3589  | O | 7.6453  | -1.4554 | 2.1499  |
| O | -5.0339 | -3.1421 | -0.1776 | O | -5.6772 | -2.1604 | 0.1277  |
| C | 6.7614  | -2.7185 | -0.5438 | C | 5.9724  | -3.7101 | -1.0657 |
| H | 2.0504  | 6.4256  | -0.2495 | H | 3.6328  | 5.1998  | -0.6465 |
| H | 2.0161  | 4.8936  | -1.1046 | H | 3.1438  | 3.6144  | -1.2187 |
| H | 2.3742  | 4.5367  | 1.2929  | H | 3.2984  | 3.6409  | 1.2276  |
| H | 0.9325  | 5.4524  | 1.7104  | H | 2.2052  | 5.0135  | 1.3454  |
| H | 0.2101  | 6.3414  | -1.9098 | H | 1.9113  | 5.3578  | -2.4235 |
| H | -0.3416 | 6.6272  | -0.2706 | H | 1.4266  | 6.1082  | -0.9152 |
| H | -1.7842 | 1.9816  | 1.0448  | H | -1.439  | 2.449   | 1.0505  |
| H | -2.8803 | 2.914   | 0.0965  | H | -2.1598 | 3.4684  | -0.1381 |
| H | -0.5879 | 1.1817  | -0.9434 | H | -0.4602 | 0.9858  | -0.6677 |
| H | -1.0257 | 1.9004  | -3.1912 | H | -0.6257 | 1.3484  | -3.0312 |

|              |                  |                  |                  |              |                  |                  |                  |
|--------------|------------------|------------------|------------------|--------------|------------------|------------------|------------------|
| H            | -2.4004          | 2.876            | -2.7188          | H            | -1.6364          | 2.7653           | -2.8431          |
| H            | -0.5401          | 4.3288           | -3.1686          | H            | 0.6047           | 3.4685           | -3.3788          |
| H            | 0.5328           | 3.4131           | -2.1489          | H            | 1.3021           | 2.4817           | -2.1247          |
| H            | -2.5751          | 6.032            | -0.5946          | H            | -0.8665          | 6.1687           | -1.3281          |
| H            | -2.2603          | 5.8288           | -2.3163          | H            | -0.5852          | 5.5489           | -2.9531          |
| H            | -3.0875          | 4.5605           | -1.4129          | H            | -1.7941          | 4.7932           | -1.9151          |
| H            | -1.5522          | 4.2178           | 2.1442           | H            | -0.5582          | 4.6935           | 1.7625           |
| H            | -3.6419          | 0.8775           | -3.096           | H            | -3.563           | 1.4308           | -2.8358          |
| H            | -3.5808          | -0.0324          | 2.4431           | H            | -3.4925          | 0.4964           | 2.7544           |
| H            | -5.2745          | -0.1315          | 2.8914           | H            | -5.1444          | 0.7598           | 3.2861           |
| H            | -5.929           | -0.76            | 0.608            | H            | -6.0238          | 0.3501           | 1.0261           |
| H            | -5.0059          | 0.7366           | 0.6045           | H            | -4.802           | 1.6158           | 1.006            |
| H            | -5.3618          | -2.4996          | 2.5048           | H            | -5.7729          | -1.5169          | 2.848            |
| H            | -4.0212          | -2.1572          | 3.5814           | H            | -4.3512          | -1.5121          | 3.8735           |
| H            | -2.9246          | -4.2918          | -0.8077          | H            | -3.8499          | -3.6882          | -0.6443          |
| H            | -2.9409          | -2.9529          | -1.8973          | H            | -3.6357          | -2.3119          | -1.6607          |
| H            | -1.0924          | -1.8633          | -0.7551          | H            | -1.5355          | -1.6967          | -0.4558          |
| H            | -0.8962          | -4.2185          | 1.1732           | H            | -1.9258          | -4.1551          | 1.286            |
| H            | 0.067            | -2.7584          | 1.1768           | H            | -0.5979          | -3.015           | 1.3246           |
| H            | -1.6853          | -2.7529          | 2.9247           | H            | -2.2397          | -2.5927          | 3.119            |
| H            | -1.7724          | -1.3842          | 1.8528           | H            | -2.0436          | -1.2146          | 2.0682           |
| H            | 1.7184           | -3.6177          | -2.3494          | H            | -0.4323          | -3.5427          | -3.4446          |
| H            | 0.3011           | -5.4219          | -2.5208          | H            | -0.344           | -5.382           | -2.0418          |
| H            | -1.3529          | -5.5074          | -1.7268          | H            | -1.0424          | -5.4014          | -0.3418          |
| H            | -3.0187          | -4.9934          | 1.2998           | H            | -4.127           | -4.4221          | 1.4619           |
| H            | -3.3418          | -4.5331          | 2.9697           | H            | -4.2297          | -3.9756          | 3.1654           |
| H            | -4.6647          | -4.6298          | 1.8103           | H            | -5.605           | -3.7098          | 2.0975           |
| H            | 5.617            | -4.3762          | 0.1534           | H            | 7.6039           | -2.9152          | 0.0492           |
| H            | 5.0883           | -3.7559          | -1.4114          | H            | 6.4372           | -3.8017          | 1.032            |
| H            | 6.0758           | -1.3783          | -2.0543          | H            | 4.1195           | -4.2912          | -0.1829          |
| H            | 7.4899           | -0.8003          | -1.1912          | H            | 4.061            | -4.1824          | -1.9333          |
| H            | 3.6954           | -0.0957          | 2.0149           | H            | 3.9984           | 0.5837           | -0.3929          |
| H            | 2.4164           | -1.031           | 1.2802           | H            | 4.4547           | 0.4463           | 1.2822           |
| H            | 2.4076           | 0.3523           | -0.73            | H            | 2.4933           | -0.9332          | 1.8071           |
| H            | 3.7693           | 2.4035           | -0.9             | H            | 0.6955           | -1.2579          | 0.1655           |
| H            | 4.514            | 2.0915           | 0.6578           | H            | 1.6163           | -0.4524          | -1.0911          |
| H            | 4.7038           | 0.4159           | -1.8811          | H            | 2.3146           | -3.0328          | 0.3659           |
| H            | 5.9885           | 1.3864           | -1.18            | H            | 1.8385           | -2.8821          | -1.3172          |
| H            | 1.6804           | 1.032            | 2.9432           | H            | 1.4115           | 0.8707           | 3.3852           |
| H            | 5.881            | 0.6429           | 1.7742           | H            | 3.5252           | -0.5741          | -2.3307          |
| H            | 6.7869           | -0.8623          | 1.7081           | H            | 5.0306           | -1.4334          | -2.6239          |
| H            | 7.3315           | 0.5413           | 0.7805           | H            | 3.4872           | -2.167           | -3.0797          |
| H            | 2.5071           | -3.0024          | 1.4278           | H            | 6.2791           | -0.0049          | 1.8512           |
| H            | -5.3196          | -2.8974          | -1.0833          | H            | -5.9435          | -1.8149          | -0.7511          |
| H            | 7.2765           | -2.6969          | 0.4234           | H            | 6.3491           | -3.1752          | -1.945           |
| H            | 7.4167           | -3.262           | -1.2343          | H            | 6.3286           | -4.7431          | -1.1534          |
| <b>3d-11</b> | <b>X axis(Å)</b> | <b>Y axis(Å)</b> | <b>Z axis(Å)</b> | <b>3d-12</b> | <b>X axis(Å)</b> | <b>Y axis(Å)</b> | <b>Z axis(Å)</b> |



|   |         |         |         |   |         |         |         |
|---|---------|---------|---------|---|---------|---------|---------|
| C | 5.4303  | 0.6606  | 1.7256  | C | 2.3736  | 4.1787  | -1.4141 |
| C | 5.4154  | 0.8649  | 0.216   | C | 2.1707  | 3.8906  | 0.069   |
| C | 4.1529  | 0.2537  | -0.4044 | C | 1.2901  | 2.6501  | 0.2658  |
| C | 4.0282  | -1.2786 | -0.0847 | C | -0.1069 | 2.8177  | -0.429  |
| C | 4.1442  | -1.5768 | 1.4584  | C | 0.0213  | 3.2177  | -1.9468 |
| C | 5.3516  | -0.819  | 2.0816  | C | 1.0411  | 4.3789  | -2.1273 |
| C | 2.7474  | -1.932  | -0.6672 | C | -1.0196 | 1.5781  | -0.278  |
| C | 1.4525  | -1.6154 | 0.0986  | C | -0.646  | 0.3818  | -1.1665 |
| C | 1.5994  | -1.8704 | 1.6018  | C | -0.4893 | 0.7913  | -2.6348 |
| C | 2.835   | -1.1885 | 2.1903  | C | 0.4409  | 1.996   | -2.8045 |
| C | 4.4182  | -3.0859 | 1.7291  | C | -1.3269 | 3.7567  | -2.5101 |
| C | 4.1509  | 0.5072  | -1.8939 | C | 1.1501  | 2.3532  | 1.7451  |
| O | 4.8276  | -0.0775 | -2.7285 | O | 0.452   | 2.9633  | 2.5437  |
| O | 5.1486  | -1.9581 | -0.7058 | O | -0.7945 | 3.9167  | 0.2202  |
| C | 0.2629  | -2.3572 | -0.4642 | C | -1.6227 | -0.7606 | -1.0305 |
| O | -0.8306 | -1.5686 | -0.8261 | O | -2.9811 | -0.4517 | -1.0739 |
| C | 0.1495  | -3.6731 | -0.6356 | C | -1.2889 | -2.0351 | -0.8384 |
| C | -2.349  | -0.7776 | -3.2536 | C | -5.4372 | -0.9363 | -2.6463 |
| C | -1.7814 | -2.1597 | -2.9573 | C | -4.337  | -1.9535 | -2.3683 |
| C | -1.7982 | -2.4452 | -1.4502 | C | -3.703  | -1.704  | -0.9949 |
| C | -3.2454 | -2.3363 | -0.8502 | C | -4.7685 | -1.7668 | 0.1596  |
| C | -3.941  | -0.9694 | -1.2138 | C | -5.9929 | -0.8135 | -0.1123 |
| C | -3.772  | -0.6427 | -2.7257 | C | -6.5145 | -0.9802 | -1.5691 |
| C | -3.3086 | -2.5771 | 0.6825  | C | -4.1764 | -1.4973 | 1.5686  |
| C | -2.7914 | -1.4116 | 1.5498  | C | -3.8428 | -0.0245 | 1.8632  |
| C | -3.4464 | -0.0829 | 1.1481  | C | -5.0413 | 0.8904  | 1.5591  |
| C | -3.366  | 0.183   | -0.3548 | C | -5.6048 | 0.6637  | 0.1529  |
| C | -2.9357 | -1.6217 | 3.0492  | C | -3.2641 | 0.1269  | 3.2606  |
| C | -1.9499 | -0.918  | 3.924   | C | -1.8239 | -0.2309 | 3.4433  |
| C | -3.8438 | -2.3876 | 3.6757  | C | -3.9005 | 0.586   | 4.3506  |
| O | -1.0115 | -0.2724 | 3.4727  | O | -1.1216 | -0.6684 | 2.5382  |
| C | -5.4784 | -1.0265 | -0.9721 | C | -7.204  | -1.1655 | 0.8018  |
| C | -1.1855 | -3.8043 | -1.1932 | C | -2.5814 | -2.6931 | -0.7663 |
| O | -1.7179 | -4.8863 | -1.3986 | O | -2.7097 | -3.888  | -0.5362 |
| C | -2.4841 | 4.524   | 1.5686  | C | 7.6819  | -2.4577 | 0.3839  |
| C | -1.3694 | 3.5271  | 1.3404  | C | 6.8792  | -1.1807 | 0.4497  |
| C | -0.7718 | 3.3313  | 0.1382  | C | 5.6599  | -1.0436 | -0.1256 |
| C | -1.14   | 4.1995  | -1.0835 | C | 5.0487  | -2.1548 | -1.0069 |
| C | -2.0237 | 5.421   | -0.7062 | C | 5.9923  | -3.3757 | -1.1956 |
| C | 0.302   | 2.2854  | -0.1524 | C | 4.7176  | 0.1323  | 0.0908  |
| C | 1.5742  | 2.8851  | -0.7881 | C | 3.4049  | -0.3444 | 0.7485  |
| C | 1.2109  | 3.7171  | -2.031  | C | 2.7504  | -1.4822 | -0.0494 |
| C | 0.1536  | 4.7712  | -1.7173 | C | 3.7336  | -2.6238 | -0.3308 |
| C | 2.6169  | 1.82    | -1.0736 | C | 2.4528  | 0.8066  | 0.9496  |
| C | 3.206   | 1.5545  | -2.2391 | C | 1.9686  | 1.2124  | 2.1212  |
| O | 3.021   | 1.0514  | 0.0227  | O | 2.0487  | 1.5025  | -0.1895 |
| C | -1.9072 | 3.3485  | -2.1219 | C | 4.7508  | -1.6273 | -2.4325 |

|   |         |         |         |   |         |         |         |
|---|---------|---------|---------|---|---------|---------|---------|
| C | -1.0071 | 2.7853  | 2.5927  | C | 7.5396  | -0.0995 | 1.2453  |
| O | -1.528  | 3.0438  | 3.6742  | O | 8.5916  | -0.269  | 1.8519  |
| O | -4.0588 | -3.3703 | -1.4598 | O | -5.3091 | -3.1117 | 0.196   |
| C | -3.1118 | 5.0547  | 0.2874  | C | 6.8273  | -3.6709 | 0.038   |
| H | 6.3539  | 1.0829  | 2.1386  | H | 2.9827  | 5.0833  | -1.5263 |
| H | 4.604   | 1.2086  | 2.1922  | H | 2.9377  | 3.3661  | -1.8855 |
| H | 5.4629  | 1.9427  | 0.0141  | H | 3.1563  | 3.742   | 0.5285  |
| H | 6.3167  | 0.4239  | -0.2282 | H | 1.7249  | 4.7639  | 0.5614  |
| H | 5.3339  | -0.9207 | 3.1744  | H | 1.2317  | 4.5473  | -3.195  |
| H | 6.2876  | -1.2895 | 1.7503  | H | 0.601   | 5.3119  | -1.749  |
| H | 2.6278  | -1.6527 | -1.7221 | H | -1.0368 | 1.2665  | 0.7712  |
| H | 2.9004  | -3.0193 | -0.7045 | H | -2.056  | 1.8816  | -0.4792 |
| H | 1.2375  | -0.5515 | -0.0314 | H | 0.3215  | 0.0028  | -0.8314 |
| H | 0.712   | -1.5004 | 2.1239  | H | -0.0827 | -0.0495 | -3.2118 |
| H | 1.637   | -2.9463 | 1.8106  | H | -1.4684 | 1.0113  | -3.0777 |
| H | 2.907   | -1.4554 | 3.2528  | H | 0.4593  | 2.2738  | -3.8665 |
| H | 2.6805  | -0.105  | 2.1723  | H | 1.4636  | 1.6849  | -2.5685 |
| H | 5.3895  | -3.3998 | 1.3304  | H | -1.633  | 4.6838  | -2.0126 |
| H | 4.4343  | -3.2901 | 2.8063  | H | -1.2378 | 3.9827  | -3.5794 |
| H | 3.6632  | -3.7401 | 1.2852  | H | -2.1486 | 3.0446  | -2.396  |
| H | 5.1814  | -1.7109 | -1.6542 | H | -0.8292 | 3.7357  | 1.183   |
| H | 0.8299  | -4.4744 | -0.4197 | H | -0.33   | -2.5054 | -0.7433 |
| H | -1.7066 | -0.003  | -2.821  | H | -5.0142 | 0.072   | -2.719  |
| H | -2.3481 | -0.6105 | -4.3371 | H | -5.8913 | -1.152  | -3.6206 |
| H | -2.3535 | -2.9217 | -3.5014 | H | -4.7448 | -2.9702 | -2.4284 |
| H | -0.7561 | -2.201  | -3.3469 | H | -3.5829 | -1.8711 | -3.1616 |
| H | -4.4101 | -1.3137 | -3.3169 | H | -7.0341 | -1.9439 | -1.6616 |
| H | -4.1312 | 0.374   | -2.9316 | H | -7.2663 | -0.2109 | -1.7877 |
| H | -4.3504 | -2.803  | 0.9433  | H | -4.8809 | -1.8646 | 2.3281  |
| H | -2.7666 | -3.496  | 0.9408  | H | -3.2895 | -2.1255 | 1.7191  |
| H | -1.7195 | -1.3275 | 1.3535  | H | -3.0564 | 0.2977  | 1.1812  |
| H | -4.4943 | -0.0643 | 1.4721  | H | -5.8432 | 0.7423  | 2.2904  |
| H | -2.9609 | 0.7486  | 1.6723  | H | -4.7348 | 1.9404  | 1.6511  |
| H | -3.9085 | 1.1127  | -0.5685 | H | -6.4833 | 1.3092  | 0.0227  |
| H | -2.324  | 0.384   | -0.6189 | H | -4.8741 | 1.0173  | -0.5811 |
| H | -2.1052 | -1.0222 | 5.0112  | H | -1.416  | -0.08   | 4.4573  |
| H | -3.8739 | -2.4895 | 4.7571  | H | -3.4116 | 0.6818  | 5.3162  |
| H | -4.605  | -2.9377 | 3.1323  | H | -4.9442 | 0.8814  | 4.3239  |
| H | -5.7363 | -1.2943 | 0.0559  | H | -6.9534 | -1.1438 | 1.8655  |
| H | -5.9402 | -0.0539 | -1.1803 | H | -8.0264 | -0.4571 | 0.6458  |
| H | -5.9654 | -1.7573 | -1.6274 | H | -7.5985 | -2.1647 | 0.5856  |
| H | -3.2848 | 4.0716  | 2.1667  | H | 8.4787  | -2.3361 | -0.3604 |
| H | -2.0833 | 5.3648  | 2.1496  | H | 8.1665  | -2.6627 | 1.3459  |
| H | -1.4075 | 6.214   | -0.2603 | H | 5.4148  | -4.2672 | -1.471  |
| H | -2.4771 | 5.8588  | -1.6044 | H | 6.6822  | -3.1938 | -2.0316 |
| H | -0.1223 | 1.5283  | -0.8241 | H | 4.524   | 0.6269  | -0.8683 |
| H | 0.5903  | 1.7369  | 0.746   | H | 5.1476  | 0.908   | 0.7283  |

|   |         |         |         |   |         |         |         |
|---|---------|---------|---------|---|---------|---------|---------|
| H | 2.0221  | 3.5704  | -0.0537 | H | 3.6639  | -0.7505 | 1.7379  |
| H | 2.1044  | 4.2269  | -2.4136 | H | 1.8938  | -1.8802 | 0.509   |
| H | 0.8518  | 3.0683  | -2.8393 | H | 2.3499  | -1.1079 | -0.9984 |
| H | 0.6054  | 5.5061  | -1.0365 | H | 3.9605  | -3.1233 | 0.6203  |
| H | -0.0888 | 5.3164  | -2.6387 | H | 3.2316  | -3.3713 | -0.9584 |
| H | 3.085   | 1.9844  | -3.2148 | H | 2.1136  | 0.8323  | 3.1139  |
| H | -1.3247 | 2.4963  | -2.4837 | H | 4.0167  | -0.8171 | -2.4521 |
| H | -2.8362 | 2.9463  | -1.7066 | H | 5.6625  | -1.2451 | -2.9072 |
| H | -2.1731 | 3.9485  | -3      | H | 4.356   | -2.4289 | -3.0683 |
| H | -0.237  | 2.0086  | 2.5127  | H | 7.0509  | 0.883   | 1.2537  |
| H | -3.6057 | -4.2331 | -1.3495 | H | -4.5639 | -3.7461 | 0.2574  |
| H | -3.789  | 4.3059  | -0.1392 | H | 7.4749  | -4.5356 | -0.1472 |
| H | -3.7232 | 5.9354  | 0.5157  | H | 6.1809  | -3.9337 | 0.8838  |

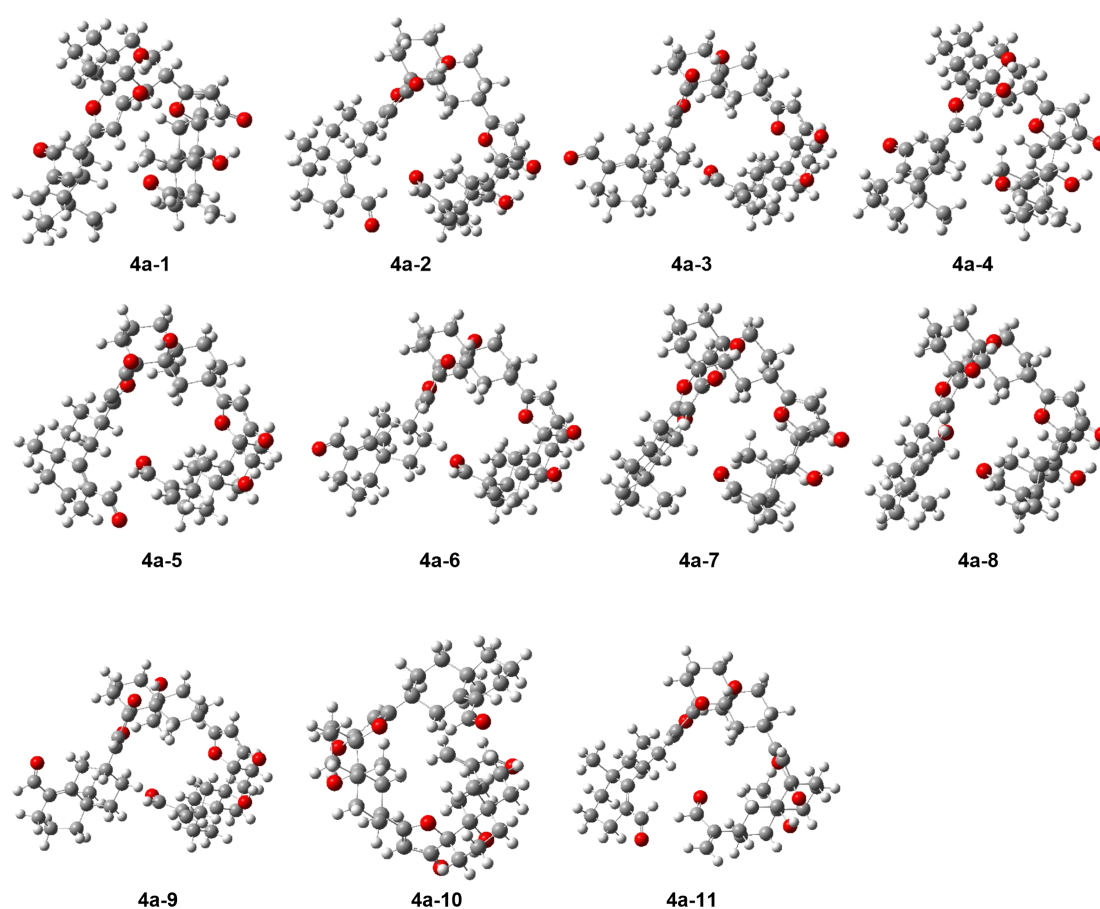

**Figure S21.** Optimized geometries of predominant conformers for **4a** at the B3LYP/6-31G (d,p) level

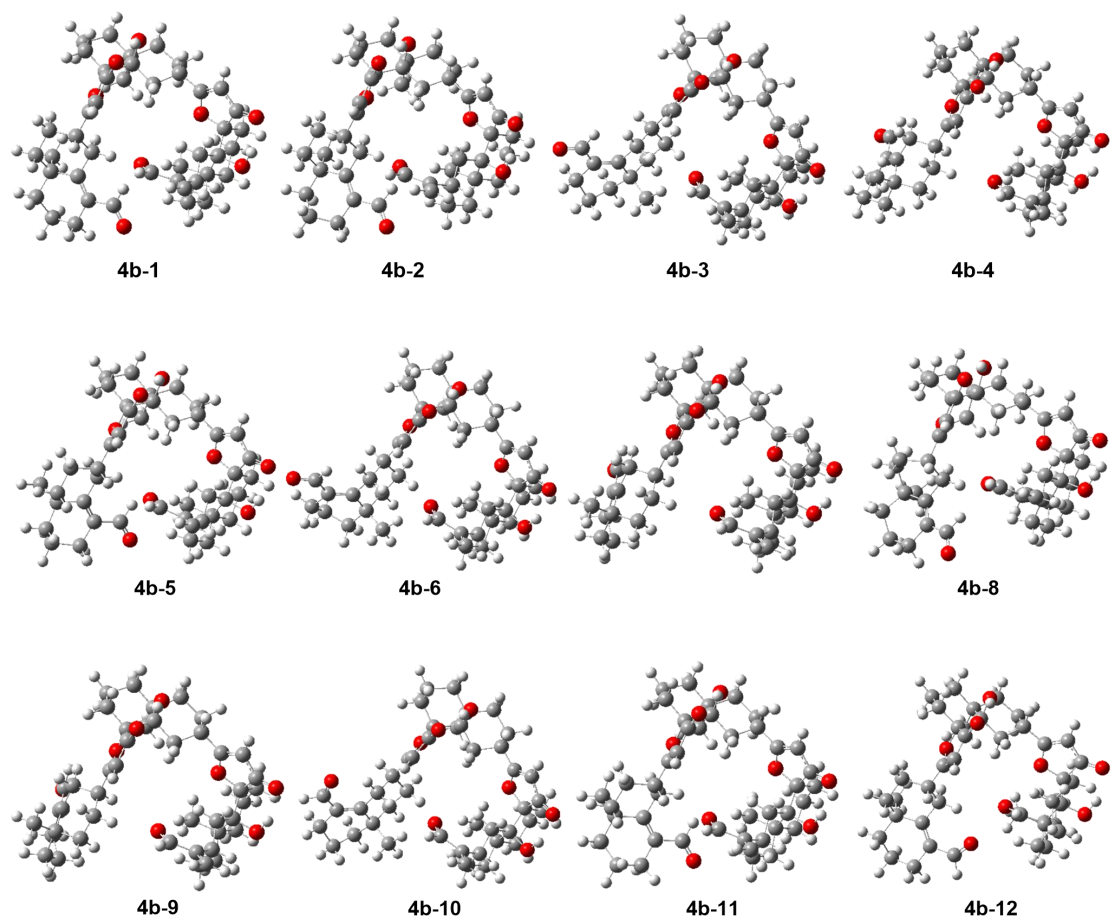

**Figure S22.** Optimized geometries of predominant conformers for **4b** at the B3LYP/6-31G (d,p) level

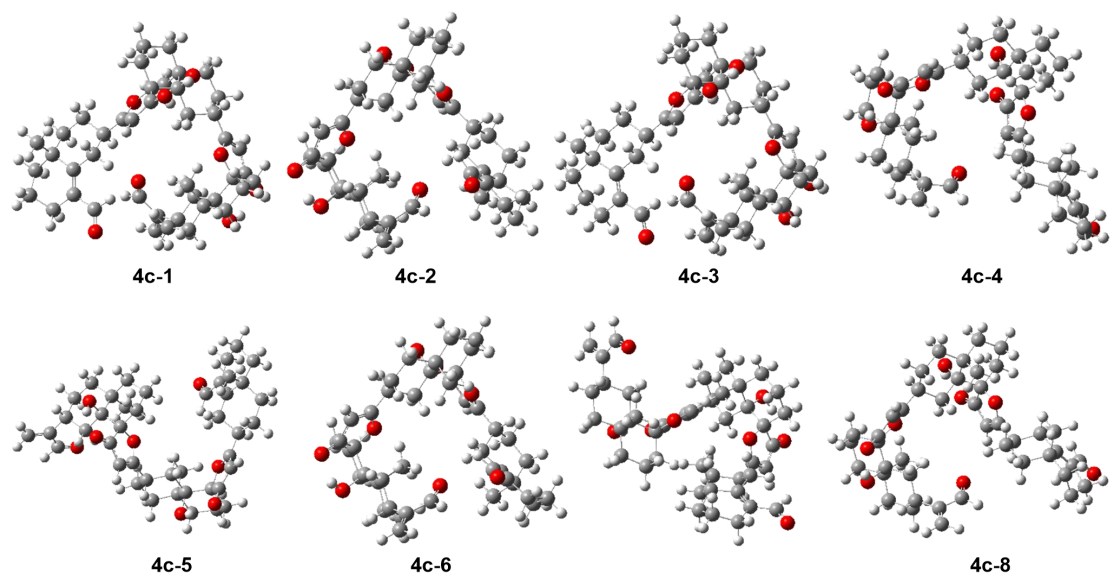

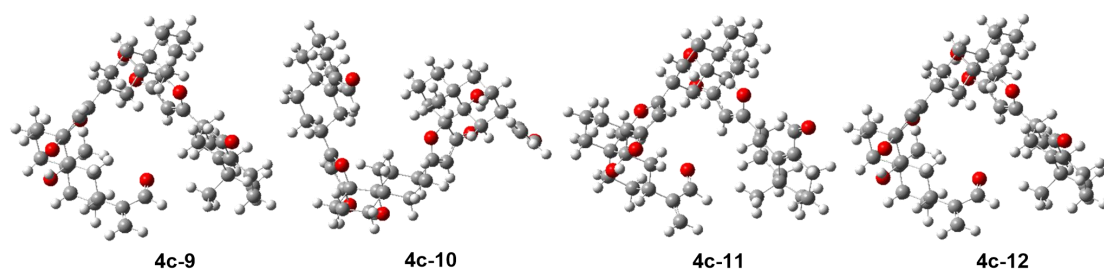

**Figure S23.** Optimized geometries of predominant conformers for **4c** at the B3LYP/6-31G (d,p) level

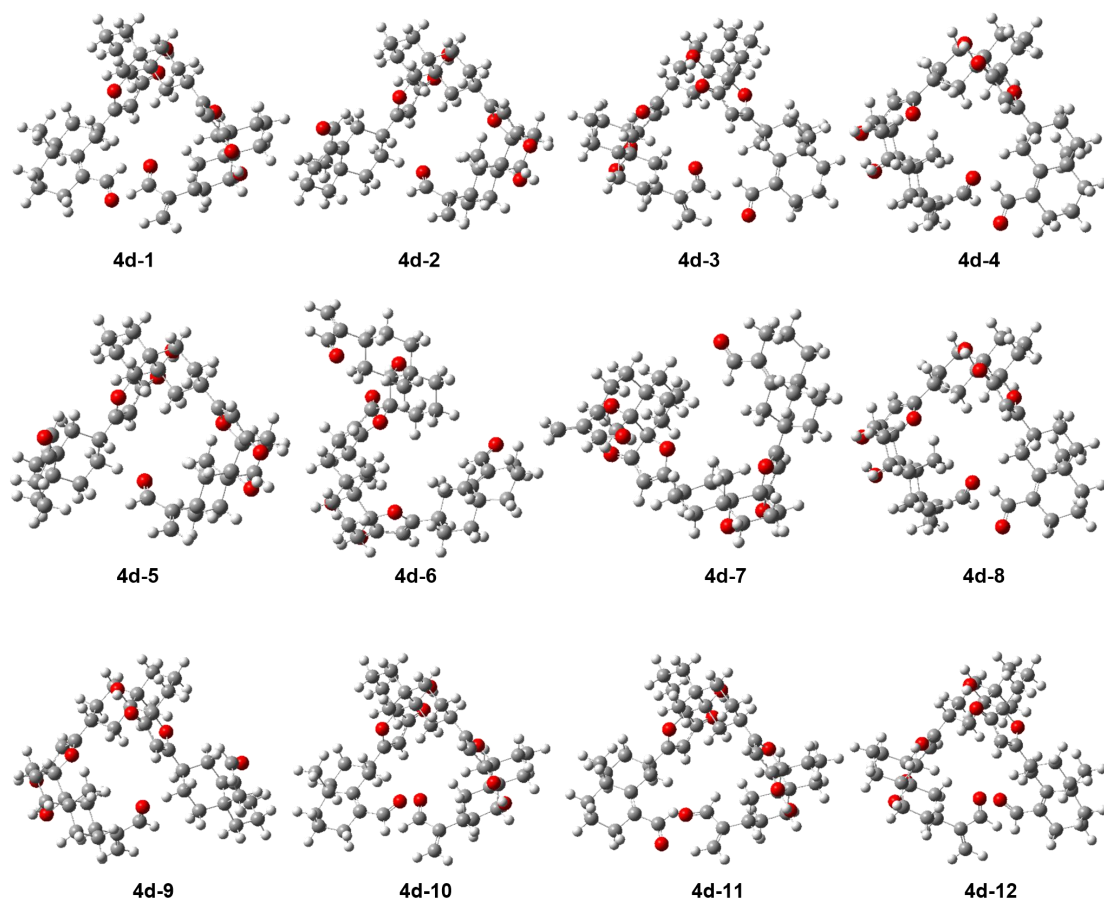

**Figure S24.** Optimized geometries of predominant conformers for **4d** at the B3LYP/6-31G (d,p) level

**Table S8.** Conformational analysis of the optimized **4a-4d** at the B3LYP/6-31G(d,p) level in the gas phase

|    | <i>Conformers</i> | G (Hartree) | $\Delta G$ (Kcal/mol) | Population |
|----|-------------------|-------------|-----------------------|------------|
| 4a | 4a-1              | -2273.33080 | 0.23406123            | 20.88%     |
|    | 4a-2              | -2273.33117 | 0                     | 30.99%     |
|    | 4a-3              | -2273.33108 | 0.05584839            | 28.21%     |

|    |                   |             |                       |            |
|----|-------------------|-------------|-----------------------|------------|
|    | 4a-4              | -2273.32889 | 1.43448786            | 2.75%      |
|    | 4a-5              | -2273.32875 | 1.5185742             | 2.39%      |
|    | 4a-6              | -2273.32965 | 0.95193267            | 6.21%      |
|    | 4a-7              | -2273.32688 | 2.69139039            | 0.33%      |
|    | 4a-8              | -2273.32688 | 2.69076288            | 0.33%      |
|    | 4a-9              | -2273.32935 | 1.1420682             | 4.51%      |
|    | 4a-10             | -2273.32852 | 1.66352901            | 1.87%      |
|    | 4a-11             | -2273.32834 | 1.77459828            | 1.55%      |
|    | <i>Conformers</i> | G (Hartree) | $\Delta G$ (Kcal/mol) | Population |
| 4b | 4b-1              | -2273.32986 | 0.76305216            | 9.82%      |
|    | 4b-2              | -2273.32834 | 1.71686736            | 1.96%      |
|    | 4b-3              | -2273.33063 | 0.27986946            | 22.21%     |
|    | 4b-4              | -2273.33107 | 0                     | 35.62%     |
|    | 4b-5              | -2273.32890 | 1.36546176            | 3.55%      |
|    | 4b-6              | -2273.32863 | 1.5311244             | 2.68%      |
|    | 4b-7              | -2273.32996 | 0.69841863            | 10.95%     |
|    | 4b-8              | -2273.32506 | 3.77321763            | 0.06%      |
|    | 4b-9              | -2273.32996 | 0.69841863            | 10.95%     |
|    | 4b-10             | -2273.32804 | 1.90386534            | 1.43%      |
|    | 4b-11             | -2273.32735 | 2.33747475            | 0.69%      |
|    | 4b-12             | -2273.32516 | 3.70732908            | 0.07%      |
|    | <i>Conformers</i> | G (Hartree) | $\Delta G$ (Kcal/mol) | Population |
| 4c | 4c-1              | -2273.33008 | 1.04605917            | 6.35%      |
|    | 4c-2              | -2273.32752 | 2.65122975            | 0.42%      |
|    | 4c-3              | -2273.32840 | 2.10090348            | 1.07%      |
|    | 4c-4              | -2273.33052 | 0.77120979            | 10.10%     |
|    | 4c-5              | -2273.33068 | 0.66955317            | 12.00%     |
|    | 4c-6              | -2273.32723 | 2.83446267            | 0.31%      |
|    | 4c-7              | -2273.33174 | 0                     | 37.16%     |
|    | 4c-8              | -2273.32894 | 1.757028              | 1.91%      |
|    | 4c-9              | -2273.32935 | 1.50414147            | 2.93%      |
|    | 4c-10             | -2273.33127 | 0.2949297             | 22.58%     |
|    | 4c-11             | -2273.32908 | 1.6691766             | 2.22%      |

|    |                   |             |                       |            |
|----|-------------------|-------------|-----------------------|------------|
|    | 4c-12             | -2273.32935 | 1.50288645            | 2.94%      |
|    | <i>Conformers</i> | G (Hartree) | $\Delta G$ (Kcal/mol) | Population |
| 4d | 4d-1              | -2273.32957 | 1.13955816            | 6.09%      |
|    | 4d-2              | -2273.33066 | 0.45996483            | 19.18%     |
|    | 4d-3              | -2273.32753 | 2.4221886             | 0.70%      |
|    | 4d-4              | -2273.32831 | 1.93084827            | 1.60%      |
|    | 4d-5              | -2273.32943 | 1.2299196             | 5.23%      |
|    | 4d-6              | -2273.33139 | 0                     | 41.69%     |
|    | 4d-7              | -2273.32926 | 1.33785132            | 4.35%      |
|    | 4d-8              | -2273.32683 | 2.85893556            | 0.33%      |
|    | 4d-9              | -2273.33067 | 0.45306222            | 19.40%     |
|    | 4d-10             | -2273.32729 | 2.57216349            | 0.54%      |
|    | 4d-11             | -2273.32693 | 2.79994962            | 0.37%      |
|    | 4d-12             | -2273.32726 | 2.59098879            | 0.53%      |

| Functional<br>mPW1PW91 |      | Solvent?<br>PCM |           | Basis Set<br>6-311+G(d,p) |           |           | Type of Data<br>Unscaled Shifts |  |
|------------------------|------|-----------------|-----------|---------------------------|-----------|-----------|---------------------------------|--|
|                        |      | DP4+            | 0.00%     | 0.00%                     | 100.00%   | 0.00%     | -                               |  |
| Nuclei                 | sp2? | Experimental    | Isomer 1  | Isomer 2                  | Isomer 3  | Isomer 4  | Isomer 5                        |  |
| C                      |      | 18.3            | 21.71124  | 22.37611                  | 21.83125  | 21.86178  |                                 |  |
| C                      |      | 31.1            | 36.33472  | 36.31442                  | 36.0008   | 36.08954  |                                 |  |
| C                      |      | 91.9            | 98.32359  | 98.26312                  | 98.53558  | 98.63436  |                                 |  |
| C                      |      | 75.3            | 81.6234   | 81.69776                  | 81.58459  | 81.67673  |                                 |  |
| C                      |      | 37.5            | 42.64329  | 42.47866                  | 42.63939  | 42.63689  |                                 |  |
| C                      |      | 34              | 36.77877  | 36.75209                  | 36.57267  | 36.60723  |                                 |  |
| C                      |      | 31.1            | 34.1448   | 34.11459                  | 34.98266  | 34.69681  |                                 |  |
| C                      |      | 35.9            | 41.61404  | 41.3538                   | 41.1075   | 40.53564  |                                 |  |
| C                      |      | 25.6            | 28.86024  | 28.86506                  | 27.36355  | 26.78691  |                                 |  |
| C                      |      | 36.1            | 38.28298  | 38.41729                  | 37.97265  | 37.81802  |                                 |  |
| C                      |      | 20.8            | 21.08743  | 21.07235                  | 21.10576  | 20.96887  |                                 |  |
| C                      | x    | 209.7           | 219.8436  | 219.74532                 | 219.77354 | 219.8935  |                                 |  |
| C                      | x    | 197.7           | 209.27044 | 209.17991                 | 209.42687 | 209.98241 |                                 |  |
| C                      | x    | 102             | 108.72491 | 108.63837                 | 108.31259 | 108.07143 |                                 |  |
| C                      |      | 18.3            | 21.90272  | 21.89574                  | 22.11371  | 22.21984  |                                 |  |
| C                      |      | 31.4            | 35.78217  | 35.84291                  | 35.70376  | 35.43914  |                                 |  |
| C                      |      | 92.1            | 99.19423  | 99.29608                  | 98.80442  | 98.67876  |                                 |  |
| C                      |      | 75.7            | 82.00326  | 82.2298                   | 81.92231  | 82.10562  |                                 |  |
| C                      |      | 37.5            | 42.54189  | 42.50907                  | 42.54017  | 41.27425  |                                 |  |
| C                      |      | 34.1            | 36.6924   | 36.66143                  | 36.67963  | 35.99773  |                                 |  |
| C                      |      | 32.5            | 34.42124  | 34.44377                  | 34.97503  | 36.11811  |                                 |  |
| C                      |      | 33.4            | 43.20152  | 43.53183                  | 41.72165  | 43.35825  |                                 |  |
| C                      |      | 26.8            | 28.13242  | 28.12192                  | 27.87111  | 28.14699  |                                 |  |
| C                      |      | 36.7            | 38.53513  | 38.58971                  | 38.80583  | 38.85056  |                                 |  |
| C                      | x    | 154.8           | 162.73587 | 162.81674                 | 163.05764 | 162.69117 |                                 |  |
| C                      | x    | 195             | 206.87033 | 206.6345                  | 206.54441 | 206.6166  |                                 |  |
| C                      | x    | 134.2           | 150.69418 | 150.64576                 | 149.38595 | 150.55471 |                                 |  |
| C                      |      | 20.5            | 21.24859  | 22.88507                  | 21.24496  | 21.28467  |                                 |  |
| C                      | x    | 209.9           | 220.01006 | 219.97521                 | 220.10916 | 219.84339 |                                 |  |
| C                      |      | 24.7            | 27.79854  | 27.43069                  | 27.44988  | 27.47406  |                                 |  |
| C                      | x    | 134.4           | 141.91186 | 141.76958                 | 142.04037 | 141.72484 |                                 |  |
| C                      | x    | 160.1           | 178.90296 | 179.45933                 | 178.3352  | 178.97238 |                                 |  |
| C                      |      | 36.9            | 43.36686  | 43.62503                  | 43.28358  | 43.13361  |                                 |  |
| C                      |      | 39.6            | 41.65417  | 41.5186                   | 41.41964  | 41.57867  |                                 |  |
| C                      |      | 26.9            | 30.61675  | 30.80064                  | 31.00308  | 30.44242  |                                 |  |
| C                      |      | 41.8            | 47.55591  | 47.15483                  | 47.16475  | 46.80541  |                                 |  |
| C                      |      | 26.3            | 28.45004  | 27.58925                  | 27.69221  | 28.24022  |                                 |  |
| C                      |      | 40.9            | 43.92124  | 43.69123                  | 43.738    | 43.64987  |                                 |  |
| C                      | x    | 196.7           | 208.34031 | 208.49654                 | 207.91073 | 208.26769 |                                 |  |
| C                      | x    | 102             | 108.06812 | 108.04379                 | 108.41881 | 108.45609 |                                 |  |
| C                      |      | 25.1            | 26.61205  | 26.83595                  | 26.38836  | 26.59271  |                                 |  |
| C                      | x    | 190.8           | 200.27997 | 199.23253                 | 198.84677 | 198.91827 |                                 |  |
| C                      |      | 18.3            | 21.34572  | 21.32706                  | 21.11142  | 21.12845  |                                 |  |
| H                      |      | 1.95            | 2.03032   | 2.06824                   | 2.0057    | 1.60952   |                                 |  |
| H                      |      | 1.55            | 1.59242   | 1.61616                   | 1.59104   | 2.04751   |                                 |  |
| H                      |      | 2.48            | 2.2971    | 2.29921                   | 2.30236   | 1.50858   |                                 |  |
| H                      |      | 1.5             | 1.459     | 1.43686                   | 1.47396   | 2.29777   |                                 |  |
| H                      |      | 2.11            | 2.12713   | 2.06209                   | 2.10006   | 1.18629   |                                 |  |
| H                      |      | 1.08            | 1.18927   | 1.17159                   | 1.1682    | 2.12127   |                                 |  |
| H                      |      | 1.61            | 1.03238   | 1.00422                   | 1.19792   | 1.81778   |                                 |  |
| H                      |      | 2.14            | 2.08439   | 2.12611                   | 1.93674   | 1.38494   |                                 |  |
| H                      |      | 3.44            | 3.48431   | 3.47177                   | 3.36732   | 3.36119   |                                 |  |
| H                      |      | 1.83            | 1.6933    | 1.52526                   | 1.52351   | 1.91251   |                                 |  |
| H                      |      | 1.83            | 1.91681   | 2.07406                   | 1.99739   | 1.64561   |                                 |  |
| H                      |      | 1.14            | 1.20163   | 1.20062                   | 1.20806   | 2.09753   |                                 |  |
| H                      |      | 2.2             | 2.08819   | 2.0912                    | 2.09186   | 1.19261   |                                 |  |
| H                      |      | 1.34            | 2.04646   | 1.49023                   | 2.00252   | 1.44069   |                                 |  |
| H                      |      | 1.34            | 0.48697   | 2.0054                    | 0.51355   | 0.47389   |                                 |  |
| H                      |      | 1.34            | 1.60418   | 0.6261                    | 1.56561   | 1.97956   |                                 |  |



|   |   |       |          |          |          |          |  |
|---|---|-------|----------|----------|----------|----------|--|
| H |   | 5.24  | 4.88096  | 4.90019  | 4.92285  | 5.04282  |  |
| H | x | 5.56  | 5.47046  | 5.46782  | 5.47291  | 5.49489  |  |
| H |   | 1.55  | 1.9878   | 1.95257  | 1.89432  | 1.85661  |  |
| H |   | 1.55  | 1.53724  | 1.51758  | 1.46599  | 1.60262  |  |
| H |   | 2.44  | 2.20933  | 2.19543  | 2.22176  | 2.2072   |  |
| H |   | 1.42  | 1.37651  | 1.34566  | 1.26199  | 1.31136  |  |
| H |   | 1.07  | 2.0409   | 2.03772  | 1.06352  | 1.99153  |  |
| H |   | 2.1   | 1.10479  | 1.09044  | 2.05309  | 1.04603  |  |
| H |   | 1.94  | 0.64394  | 0.64188  | 2.05388  | 0.66246  |  |
| H |   | 1.25  | 2.21502  | 2.24049  | 0.81254  | 2.31038  |  |
| H |   | 3.32  | 2.93977  | 2.94265  | 3.03474  | 2.95208  |  |
| H |   | 1.69  | 1.22692  | 1.19305  | 2.21628  | 1.15057  |  |
| H |   | 1.59  | 2.2167   | 2.27916  | 1.21217  | 2.26023  |  |
| H |   | 2.2   | 1.98945  | 2.03365  | 2.02956  | 1.99122  |  |
| H |   | 1.05  | 1.01316  | 1.04669  | 1.07042  | 1.01753  |  |
| H | x | 9.5   | 9.72478  | 9.71967  | 9.74732  | 9.70429  |  |
| H | x | 5.83  | 6.37701  | 6.4061   | 6.3897   | 6.41831  |  |
| H | x | 6.06  | 6.87201  | 6.90209  | 6.87171  | 6.88525  |  |
| H |   | 1.3   | 1.88661  | 1.93212  | 1.88956  | 1.83713  |  |
| H |   | 1.3   | 0.3175   | 0.39908  | 1.72795  | 0.35205  |  |
| H |   | 1.3   | 1.70042  | 1.77056  | 0.3977   | 1.71461  |  |
| H |   | 2.17  | 2.30485  | 2.43539  | 2.02969  | 2.06732  |  |
| H |   | 2.49  | 2.35133  | 2.24172  | 2.59837  | 2.60432  |  |
| H |   | 1.27  | 1.44791  | 1.44498  | 1.40739  | 1.40845  |  |
| H |   | 1.46  | 1.66976  | 1.62898  | 1.68047  | 1.63398  |  |
| H |   | 2.41  | 2.73732  | 4.1406   | 2.51718  | 2.56053  |  |
| H |   | 3.83  | 4.16208  | 2.62682  | 3.89824  | 3.91234  |  |
| H |   | 2.74  | 2.94943  | 2.9415   | 2.94854  | 3.34559  |  |
| H |   | 1.93  | 2.2313   | 2.65239  | 2.17017  | 2.18687  |  |
| H |   | 2.01  | 2.43049  | 2.25418  | 1.82365  | 1.92243  |  |
| H |   | 1.65  | 1.92814  | 1.72776  | 1.94102  | 1.87098  |  |
| H |   | 1.49  | 1.66574  | 1.84169  | 1.61221  | 1.64391  |  |
| H | x | 5.95  | 5.65976  | 5.6777   | 5.69197  | 5.70356  |  |
| H |   | 1.12  | 1.96425  | 0.8175   | 1.03717  | 1.86202  |  |
| H |   | 1.12  | 0.78592  | 1.99046  | 1.38198  | 0.86483  |  |
| H |   | 1.12  | 1.2651   | 1.17771  | 1.63462  | 1.37125  |  |
| H | x | 10.43 | 10.53428 | 10.66374 | 10.58585 | 10.54874 |  |
| H |   | 5.02  | 4.75845  | 4.72221  | 4.70394  | 4.68062  |  |
| H |   | 1.46  | 1.65069  | 1.64785  | 1.62225  | 1.65046  |  |
| H |   | 1.55  | 1.68827  | 1.64713  | 1.69904  | 1.69621  |  |

| Functional       | Solvent?                                                                                   |                                                                                           | Basis Set                                                                                   |                                                                                            | Type of Data    |          |
|------------------|--------------------------------------------------------------------------------------------|-------------------------------------------------------------------------------------------|---------------------------------------------------------------------------------------------|--------------------------------------------------------------------------------------------|-----------------|----------|
| mPW1PW91         | PCM                                                                                        |                                                                                           | 6-311+G(d,p)                                                                                |                                                                                            | Unscaled Shifts |          |
|                  | Isomer 1                                                                                   | Isomer 2                                                                                  | Isomer 3                                                                                    | Isomer 4                                                                                   | Isomer 5        | Isomer 6 |
| sDP4+ (H data)   |  0.00%  |  0.00% |  100.00% |  0.00%  | –               | –        |
| sDP4+ (C data)   |  12.21% |  3.20% |  66.27%  |  18.33% | –               | –        |
| sDP4+ (all data) |  0.00%  |  0.00% |  100.00% |  0.00%  | –               | –        |
| uDP4+ (H data)   |  0.00%  |  0.00% |  100.00% |  0.00%  | –               | –        |
| uDP4+ (C data)   |  2.35%  |  3.47% |  90.10%  |  4.08%  | –               | –        |
| uDP4+ (all data) |  0.00%  |  0.00% |  100.00% |  0.00%  | –               | –        |
| DP4+ (H data)    |  0.00%  |  0.00% |  100.00% |  0.00%  | –               | –        |
| DP4+ (C data)    |  0.47%  |  0.18% |  98.12%  |  1.23%  | –               | –        |
| DP4+ (all data)  |  0.00%  |  0.00% |  100.00% |  0.00%  | –               | –        |

**Figure S25.** DP4+ analysis of experimental NMR data of **4** and unscaled shifts of **4a-4d** (Isomer 1-4)

**Table S9.** The Cartesian coordinates of the lowest energy conformers for **4a–4d** in the gas phase at the B3LYP/6-31G(d,p) level

| 4a-1 | X axis(Å) | Y axis(Å) | Z axis(Å) | 4a-2 | X axis(Å) | Y axis(Å) | Z axis(Å) |
|------|-----------|-----------|-----------|------|-----------|-----------|-----------|
| C    | -0.2422   | 5.7818    | -0.6601   | C    | 0.6044    | 5.8243    | -0.3409   |
| C    | -0.3579   | 5.1996    | 0.7489    | C    | 0.1494    | 5.0856    | 0.9179    |
| C    | -0.0329   | 3.6973    | 0.797     | C    | 0.377     | 3.5679    | 0.8349    |
| C    | 1.3545    | 3.3986    | 0.1563    | C    | 1.848     | 3.2312    | 0.4532    |
| C    | 1.4194    | 3.9266    | -1.3255   | C    | 2.2532    | 3.926     | -0.8998   |
| C    | 1.091     | 5.4451    | -1.3351   | C    | 2.03      | 5.457     | -0.7651   |
| C    | 1.7771    | 1.9139    | 0.2178    | C    | 2.1426    | 1.7182    | 0.3906    |
| C    | 3.1894    | 1.6945    | -0.3735   | C    | 3.6181    | 1.4203    | 0.0405    |
| C    | 3.3236    | 2.2675    | -1.7916   | C    | 4.0904    | 2.1646    | -1.2168   |
| C    | 2.8601    | 3.7244    | -1.8732   | C    | 3.7594    | 3.6586    | -1.1711   |
| C    | 0.4457    | 3.2095    | -2.2987   | C    | 1.4607    | 3.4251    | -2.1374   |
| C    | -0.1067   | 3.2086    | 2.225     | C    | -0.0213   | 2.9256    | 2.1428    |
| O    | 0.6908    | 3.4694    | 3.1158    | O    | 0.5681    | 3.0424    | 3.2088    |
| O    | 2.3605    | 4.1356    | 0.9024    | O    | 2.7217    | 3.7744    | 1.4776    |
| C    | 3.5672    | 0.2365    | -0.3483   | C    | 3.8382    | -0.0625   | -0.1147   |
| O    | 2.7174    | -0.6406   | -1.0134   | O    | 2.956     | -0.7337   | -0.9543   |
| C    | 4.6272    | -0.2802   | 0.269     | C    | 4.7776    | -0.7821   | 0.4941    |
| C    | 2.4933    | -2.9224   | -3.0803   | C    | 2.6433    | -2.626    | -3.3439   |
| C    | 3.6805    | -2.544    | -2.1933   | C    | 3.7948    | -2.5438   | -2.3406   |
| C    | 3.2517    | -1.9709   | -0.8342   | C    | 3.3253    | -2.1282   | -0.9389   |
| C    | 2.2495    | -2.9155   | -0.1071   | C    | 2.1722    | -3.0435   | -0.4304   |
| C    | 0.9876    | -3.1921   | -1.0058   | C    | 0.9597    | -3.0399   | -1.4343   |
| C    | 1.457     | -3.7921   | -2.3593   | C    | 1.4688    | -3.4706   | -2.8378   |
| C    | 1.8239    | -2.4169   | 1.2943    | C    | 1.6889    | -2.7131   | 1.001     |
| C    | 0.8547    | -3.3992   | 1.9898    | C    | 0.5851    | -3.6856   | 1.4759    |
| C    | -0.3549   | -3.7554   | 1.1112    | C    | -0.5808   | -3.7893   | 0.4799    |
| C    | 0.068     | -4.2191   | -0.2873   | C    | -0.1012   | -4.0676   | -0.9483   |
| C    | 0.447     | -2.9311   | 3.3732    | C    | 0.1202    | -3.3811   | 2.8864    |
| C    | -0.296    | -1.6547   | 3.5585    | C    | -0.5518   | -2.0921   | 3.2053    |
| C    | 0.7315    | -3.6235   | 4.4892    | C    | 0.2861    | -4.2373   | 3.9087    |
| O    | -0.6125   | -0.9137   | 2.6361    | O    | -0.7816   | -1.2222   | 2.3734    |
| C    | 0.1341    | -1.9326   | -1.3028   | C    | 0.2489    | -1.6662   | -1.572    |
| C    | 4.4717    | -1.7032   | 0.0185    | C    | 4.4935    | -2.1279   | 0.0223    |
| O    | 5.2185    | -2.55     | 0.4899    | O    | 5.1075    | -3.1135   | 0.4077    |
| C    | -5.1617   | -1.5559   | -2.5098   | C    | -5.9189   | -2.057    | -0.9087   |
| C    | -3.9867   | -0.7501   | -2.0048   | C    | -4.8204   | -1.4115   | -0.0956   |
| C    | -3.7818   | -0.4593   | -0.6962   | C    | -4.5472   | -0.083    | -0.1183   |
| C    | -4.7776   | -0.9116   | 0.392     | C    | -5.3565   | 0.8844    | -1.0052   |
| C    | -6.123    | -1.401    | -0.2117   | C    | -6.2092   | 0.1355    | -2.0664   |
| C    | -2.5859   | 0.3066    | -0.1465   | C    | -3.4631   | 0.5993    | 0.7075    |
| C    | -2.9948   | 1.4962    | 0.7399    | C    | -2.5288   | 1.4949    | -0.1325   |
| C    | -3.8961   | 1.0119    | 1.8851    | C    | -3.357    | 2.5225    | -0.9182   |
| C    | -5.1173   | 0.2709    | 1.3399    | C    | -4.4079   | 1.8316    | -1.7845   |

|   |         |         |         |   |         |         |         |
|---|---------|---------|---------|---|---------|---------|---------|
| C | -1.7699 | 2.2599  | 1.1892  | C | -1.446  | 2.1897  | 0.667   |
| C | -1.263  | 2.3498  | 2.4175  | C | -1.207  | 2.1022  | 1.9746  |
| O | -1.1083 | 2.9576  | 0.1785  | O | -0.5749 | 2.9827  | -0.0804 |
| C | -4.1522 | -2.0714 | 1.2031  | C | -6.304  | 1.716   | -0.108  |
| C | -3.0619 | -0.3227 | -3.1027 | C | -4.0832 | -2.3917 | 0.7638  |
| O | -3.2909 | -0.5519 | -4.2861 | O | -4.2858 | -3.6008 | 0.7126  |
| O | 2.9004  | -4.1973 | 0.0991  | O | 2.6709  | -4.4074 | -0.3874 |
| C | -5.9184 | -2.3019 | -1.4182 | C | -6.9269 | -1.0707 | -1.4842 |
| H | -1.076  | 5.4233  | -1.2737 | H | -0.0967 | 5.6202  | -1.1577 |
| H | -0.353  | 6.8715  | -0.6086 | H | 0.5506  | 6.9049  | -0.1621 |
| H | 0.3134  | 5.7527  | 1.4184  | H | 0.6848  | 5.499   | 1.7824  |
| H | -1.3771 | 5.3815  | 1.1135  | H | -0.9143 | 5.303   | 1.0793  |
| H | 1.8867  | 6.0033  | -0.8247 | H | 2.7289  | 5.8744  | -0.0285 |
| H | 1.0737  | 5.821   | -2.366  | H | 2.2593  | 5.9571  | -1.7147 |
| H | 1.8045  | 1.5774  | 1.2625  | H | 1.9408  | 1.2581  | 1.3671  |
| H | 1.0386  | 1.2826  | -0.2895 | H | 1.4671  | 1.2328  | -0.3228 |
| H | 3.9038  | 2.2353  | 0.2634  | H | 4.2359  | 1.7708  | 0.8794  |
| H | 4.3715  | 2.2124  | -2.1139 | H | 5.1765  | 2.0481  | -1.3266 |
| H | 2.7576  | 1.6597  | -2.508  | H | 3.6511  | 1.717   | -2.1168 |
| H | 2.9208  | 4.0603  | -2.9164 | H | 4.0625  | 4.1202  | -2.1196 |
| H | 3.5699  | 4.3505  | -1.3172 | H | 4.377   | 4.1335  | -0.398  |
| H | -0.6039 | 3.438   | -2.1042 | H | 0.4106  | 3.7234  | -2.1272 |
| H | 0.6371  | 3.5243  | -3.3319 | H | 1.8852  | 3.844   | -3.058  |
| H | 0.5468  | 2.1213  | -2.2726 | H | 1.4824  | 2.3371  | -2.2416 |
| H | 2.2497  | 3.9307  | 1.855   | H | 2.3959  | 3.4758  | 2.3529  |
| H | 5.4023  | 0.1864  | 0.8457  | H | 5.5475  | -0.4954 | 1.1839  |
| H | 2.0198  | -2.0116 | -3.463  | H | 2.3006  | -1.6149 | -3.5903 |
| H | 2.8615  | -3.4609 | -3.9619 | H | 3.015   | -3.0548 | -4.2823 |
| H | 4.3077  | -3.4326 | -2.0458 | H | 4.2993  | -3.5175 | -2.2973 |
| H | 4.2975  | -1.8157 | -2.7351 | H | 4.5343  | -1.8279 | -2.7219 |
| H | 1.8923  | -4.7867 | -2.1975 | H | 1.7847  | -4.5217 | -2.8149 |
| H | 0.5962  | -3.9446 | -3.023  | H | 0.6511  | -3.4181 | -3.568  |
| H | 2.7083  | -2.3234 | 1.938   | H | 2.5264  | -2.8043 | 1.7049  |
| H | 1.3878  | -1.4162 | 1.2228  | H | 1.3507  | -1.6738 | 1.057   |
| H | 1.4121  | -4.3383 | 2.1245  | H | 1.044   | -4.6853 | 1.5017  |
| H | -0.9344 | -4.5564 | 1.5879  | H | -1.2594 | -4.5948 | 0.7885  |
| H | -1.0374 | -2.9039 | 1.0208  | H | -1.1792 | -2.8735 | 0.4833  |
| H | 0.5764  | -5.1878 | -0.1987 | H | 0.3067  | -5.0857 | -0.9906 |
| H | -0.8317 | -4.4085 | -0.8868 | H | -0.968  | -4.0659 | -1.6217 |
| H | -0.5543 | -1.3991 | 4.6004  | H | -0.8443 | -1.9541 | 4.2603  |
| H | 0.4434  | -3.2897 | 5.4816  | H | -0.0469 | -4.0227 | 4.9197  |
| H | 1.2733  | -4.5647 | 4.4392  | H | 0.7662  | -5.2007 | 3.7571  |
| H | 0.6109  | -1.2372 | -1.9964 | H | 0.8571  | -0.9154 | -2.0801 |
| H | -0.8198 | -2.2138 | -1.7647 | H | -0.6667 | -1.7671 | -2.1677 |
| H | -0.0965 | -1.3686 | -0.3977 | H | -0.0434 | -1.2424 | -0.6077 |
| H | -5.8511 | -0.8738 | -3.024  | H | -6.4735 | -2.7811 | -0.2992 |
| H | -4.8303 | -2.2951 | -3.2494 | H | -5.4542 | -2.6181 | -1.7297 |

|             |                  |                  |                  |             |                  |                  |                  |
|-------------|------------------|------------------|------------------|-------------|------------------|------------------|------------------|
| H           | -6.732           | -0.5423          | -0.5266          | H           | -5.5694          | -0.2131          | -2.8889          |
| H           | -6.7131          | -1.9307          | 0.5467           | H           | -6.942           | 0.816            | -2.5181          |
| H           | -1.9742          | -0.39            | 0.4367           | H           | -3.9528          | 1.1946           | 1.4891           |
| H           | -1.928           | 0.6745           | -0.9354          | H           | -2.8396          | -0.1226          | 1.2332           |
| H           | -3.5904          | 2.1904           | 0.1289           | H           | -2.014           | 0.8477           | -0.8578          |
| H           | -3.3431          | 0.3575           | 2.5692           | H           | -3.8349          | 3.2345           | -0.2344          |
| H           | -4.2386          | 1.8681           | 2.4799           | H           | -2.7073          | 3.1157           | -1.5742          |
| H           | -5.7225          | -0.0864          | 2.1831           | H           | -4.9921          | 2.5964           | -2.3125          |
| H           | -5.7391          | 1.0029           | 0.806            | H           | -3.8769          | 1.2632           | -2.5609          |
| H           | -1.5676          | 1.9022           | 3.3434           | H           | -1.6929          | 1.542            | 2.75             |
| H           | -3.2572          | -1.7644          | 1.7519           | H           | -5.7618          | 2.3424           | 0.6072           |
| H           | -4.8614          | -2.4599          | 1.943            | H           | -6.9283          | 2.3852           | -0.7113          |
| H           | -3.857           | -2.9054          | 0.5568           | H           | -6.9739          | 1.0762           | 0.4769           |
| H           | -2.1517          | 0.2165           | -2.814           | H           | -3.3446          | -1.988           | 1.466            |
| H           | 3.7735           | -4.0404          | 0.5165           | H           | 3.5117           | -4.4171          | 0.1163           |
| H           | -5.3713          | -3.2078          | -1.1334          | H           | -7.6338          | -0.7591          | -0.7068          |
| H           | -6.8884          | -2.6336          | -1.8065          | H           | -7.5195          | -1.5651          | -2.2627          |
| <b>4a-3</b> | <b>X axis(Å)</b> | <b>Y axis(Å)</b> | <b>Z axis(Å)</b> | <b>4a-4</b> | <b>X axis(Å)</b> | <b>Y axis(Å)</b> | <b>Z axis(Å)</b> |
| C           | -2.2971          | 4.8121           | -0.4649          | C           | -1.3456          | 5.5815           | -0.5061          |
| C           | -2.1335          | 4.1633           | 0.9099           | C           | -1.3313          | 4.9439           | 0.8833           |
| C           | -1.1703          | 2.9642           | 0.8866           | C           | -0.7108          | 3.5364           | 0.883            |
| C           | 0.201            | 3.3545           | 0.2618           | C           | 0.703            | 3.5426           | 0.2309           |
| C           | 0.0172           | 3.937            | -1.1892          | C           | 0.6487           | 4.1194           | -1.2331          |
| C           | -0.9572          | 5.1457           | -1.1283          | C           | 0.0228           | 5.5407           | -1.193           |
| C           | 1.2444           | 2.216            | 0.2575           | C           | 1.4143           | 2.1716           | 0.2431           |
| C           | 2.6033           | 2.6859           | -0.3119          | C           | 2.8367           | 2.257            | -0.359           |
| C           | 2.462            | 3.3349           | -1.6963          | C           | 2.842            | 2.8911           | -1.7572          |
| C           | 1.394            | 4.4318           | -1.7148          | C           | 2.0961           | 4.2277           | -1.7895          |
| C           | -0.5354          | 2.9153           | -2.2188          | C           | -0.1696          | 3.2527           | -2.2275          |
| C           | -1.0117          | 2.4144           | 2.2868           | C           | -0.6757          | 3.0002           | 2.2954           |
| O           | -0.4069          | 2.9516           | 3.205            | O           | 0.065            | 3.3831           | 3.1911           |
| O           | 0.7716           | 4.4219           | 1.0664           | O           | 1.5472           | 4.442            | 0.999            |
| C           | 3.5944           | 1.5524           | -0.3508          | C           | 3.4959           | 0.9027           | -0.3854          |
| O           | 3.223            | 0.4244           | -1.0738          | O           | 2.8235           | -0.105           | -1.0678          |
| C           | 4.7759           | 1.5316           | 0.2617           | C           | 4.6479           | 0.5877           | 0.2022           |
| C           | 4.0219           | -1.6136          | -3.2439          | C           | 2.9988           | -2.3393          | -3.1874          |
| C           | 4.9246           | -0.7943          | -2.3203          | C           | 4.1101           | -1.7605          | -2.3101          |
| C           | 4.2928           | -0.5373          | -0.9441          | C           | 3.6075           | -1.3105          | -0.9304          |
| C           | 3.8177           | -1.8624          | -0.2782          | C           | 2.8202           | -2.4457          | -0.2116          |
| C           | 2.8043           | -2.626           | -1.2093          | C           | 1.6157           | -2.9391          | -1.0963          |
| C           | 3.4825           | -2.887           | -2.5822          | C           | 2.1627           | -3.4072          | -2.4726          |
| C           | 3.2232           | -1.675           | 1.1379           | C           | 2.3367           | -2.0693          | 1.2089           |
| C           | 2.7981           | -3.0192          | 1.7707           | C           | 1.5875           | -3.2335          | 1.8951           |
| C           | 1.8689           | -3.8345          | 0.8571           | C           | 0.4514           | -3.7973          | 1.0271           |
| C           | 2.4436           | -3.9895          | -0.5556          | C           | 0.926            | -4.1397          | -0.3896          |
| C           | 2.2347           | -2.8499          | 3.1682           | C           | 1.1247           | -2.8795          | 3.2949           |
| C           | 0.9942           | -2.06            | 3.3993           | C           | 0.1541           | -1.7734          | 3.52             |

|   |         |         |         |   |         |         |         |
|---|---------|---------|---------|---|---------|---------|---------|
| C | 2.8119  | -3.3872 | 4.2563  | C | 1.5587  | -3.5253 | 4.3905  |
| O | 0.3687  | -1.5028 | 2.506   | O | -0.3191 | -1.0924 | 2.6186  |
| C | 1.4773  | -1.8637 | -1.4591 | C | 0.5302  | -1.8604 | -1.3459 |
| C | 5.2704  | 0.2031  | -0.0593 | C | 4.7696  | -0.8309 | -0.0899 |
| O | 6.3198  | -0.2441 | 0.3832  | O | 5.6777  | -1.5268 | 0.3439  |
| C | -7.0461 | -2.5682 | -0.7022 | C | -5.166  | -2.1213 | -2.455  |
| C | -6.2853 | -1.3879 | -0.1427 | C | -3.9531 | -1.3603 | -1.9777 |
| C | -4.9905 | -1.1169 | -0.4413 | C | -3.6488 | -1.2081 | -0.666  |
| C | -4.1758 | -2.0358 | -1.3779 | C | -4.4582 | -1.9102 | 0.4451  |
| C | -4.886  | -3.3935 | -1.637  | C | -5.5977 | -2.814  | -0.1044 |
| C | -4.2044 | 0.0828  | 0.0747  | C | -2.5712 | -0.2824 | -0.1219 |
| C | -2.8604 | -0.3159 | 0.7122  | C | -3.1954 | 0.8119  | 0.767   |
| C | -2.0213 | -1.1505 | -0.2585 | C | -4.0347 | 0.1861  | 1.896   |
| C | -2.7986 | -2.3701 | -0.746  | C | -5.0689 | -0.8095 | 1.3528  |
| C | -2.0967 | 0.8996  | 1.1714  | C | -2.1329 | 1.7787  | 1.2358  |
| C | -1.6731 | 1.1269  | 2.4127  | C | -1.6465 | 1.9323  | 2.466   |
| O | -1.8061 | 1.8595  | 0.2061  | O | -1.6204 | 2.6146  | 0.2433  |
| C | -3.9702 | -1.3212 | -2.7348 | C | -3.5509 | -2.8428 | 1.285   |
| C | -7.1216 | -0.5337 | 0.7584  | C | -3.1521 | -0.7537 | -3.0868 |
| O | -8.2564 | -0.8482 | 1.1021  | O | -3.4741 | -0.8507 | -4.2665 |
| O | 4.9719  | -2.7305 | -0.1224 | O | 3.7086  | -3.583  | -0.0492 |
| C | -6.3731 | -3.2263 | -1.8995 | C | -6.2283 | -2.2643 | -1.3717 |
| H | -2.8845 | 4.1524  | -1.1132 | H | -2.0953 | 5.0825  | -1.13   |
| H | -2.8844 | 5.7322  | -0.3602 | H | -1.6724 | 6.6246  | -0.4192 |
| H | -1.7774 | 4.9201  | 1.6206  | H | -0.7794 | 5.5992  | 1.5694  |
| H | -3.1247 | 3.8501  | 1.2623  | H | -2.3634 | 4.9062  | 1.2549  |
| H | -0.4941 | 5.9721  | -0.5735 | H | 0.6944  | 6.2307  | -0.6655 |
| H | -1.1455 | 5.5301  | -2.1389 | H | -0.0772 | 5.938   | -2.2112 |
| H | 1.4226  | 1.8698  | 1.2841  | H | 1.5178  | 1.8148  | 1.2763  |
| H | 0.8658  | 1.3501  | -0.2977 | H | 0.8118  | 1.4218  | -0.2823 |
| H | 3.0009  | 3.4537  | 0.367   | H | 3.4354  | 2.9074  | 0.2944  |
| H | 2.2266  | 2.578   | -2.4544 | H | 3.8771  | 3.0572  | -2.0828 |
| H | 3.4223  | 3.7727  | -1.998  | H | 2.4032  | 2.2059  | -2.4928 |
| H | 1.2945  | 4.8157  | -2.7382 | H | 2.0798  | 4.6023  | -2.821  |
| H | 1.7493  | 5.2781  | -1.1127 | H | 2.6709  | 4.9648  | -1.2141 |
| H | -1.5756 | 2.6388  | -2.0362 | H | -1.242  | 3.2595  | -2.0237 |
| H | -0.5085 | 3.3393  | -3.2301 | H | -0.0539 | 3.6321  | -3.2502 |
| H | 0.0427  | 1.9879  | -2.2459 | H | 0.1478  | 2.2066  | -2.2372 |
| H | 0.7727  | 4.1335  | 2.0039  | H | 1.4877  | 4.1881  | 1.9445  |
| H | 5.263   | 2.264   | 0.876   | H | 5.3263  | 1.1811  | 0.7841  |
| H | 3.1914  | -0.9885 | -3.5899 | H | 2.3521  | -1.5276 | -3.5384 |
| H | 4.5846  | -1.8886 | -4.1441 | H | 3.4446  | -2.7774 | -4.0884 |
| H | 5.8808  | -1.3205 | -2.2033 | H | 4.8984  | -2.5156 | -2.1955 |
| H | 5.1535  | 0.1574  | -2.817  | H | 4.5654  | -0.9157 | -2.8427 |
| H | 4.3147  | -3.5926 | -2.4608 | H | 2.7833  | -4.3036 | -2.3439 |
| H | 2.7744  | -3.3716 | -3.2665 | H | 1.3332  | -3.7066 | -3.126  |
| H | 3.9775  | -1.2291 | 1.7994  | H | 3.2003  | -1.8226 | 1.8403  |

|             |                  |                  |                  |             |                  |                  |                  |
|-------------|------------------|------------------|------------------|-------------|------------------|------------------|------------------|
| H           | 2.3861           | -0.9712          | 1.107            | H           | 1.7164           | -1.169           | 1.1703           |
| H           | 3.7168           | -3.6167          | 1.87             | H           | 2.3171           | -4.0506          | 1.999            |
| H           | 1.7149           | -4.8332          | 1.2857           | H           | 0.0471           | -4.7054          | 1.4925           |
| H           | 0.8752           | -3.3772          | 0.7977           | H           | -0.3839          | -3.0919          | 0.9695           |
| H           | 3.3309           | -4.6337          | -0.5059          | H           | 1.6127           | -4.9942          | -0.3345          |
| H           | 1.7184           | -4.5293          | -1.1779          | H           | 0.0671           | -4.4854          | -0.9791          |
| H           | 0.6564           | -1.997           | 4.4478           | H           | -0.1259          | -1.5899          | 4.5714           |
| H           | 2.4115           | -3.2657          | 5.2584           | H           | 1.2312           | -3.2721          | 5.3945           |
| H           | 3.7214           | -3.9767          | 4.1723           | H           | 2.2701           | -4.3434          | 4.311            |
| H           | 1.5918           | -0.9941          | -2.1092          | H           | 0.85             | -1.0719          | -2.03            |
| H           | 0.7442           | -2.5142          | -1.9511          | H           | -0.3629          | -2.3085          | -1.798           |
| H           | 1.0251           | -1.5086          | -0.5316          | H           | 0.2163           | -1.3706          | -0.4227          |
| H           | -7.1678          | -3.3104          | 0.0973           | H           | -5.6341          | -1.6133          | -3.3065          |
| H           | -8.053           | -2.2632          | -1.0129          | H           | -4.8483          | -3.1119          | -2.8034          |
| H           | -4.766           | -4.056           | -0.7687          | H           | -6.3725          | -2.9602          | 0.6587           |
| H           | -4.4198          | -3.9142          | -2.483           | H           | -5.2077          | -3.8159          | -0.3327          |
| H           | -4.0398          | 0.7694           | -0.7659          | H           | -1.8434          | -0.8673          | 0.4481           |
| H           | -4.7598          | 0.662            | 0.8152           | H           | -1.9923          | 0.1997           | -0.9116          |
| H           | -3.0796          | -0.941           | 1.5902           | H           | -3.8917          | 1.395            | 0.1454           |
| H           | -1.6914          | -0.5481          | -1.1134          | H           | -3.39            | -0.3213          | 2.6231           |
| H           | -1.1132          | -1.4955          | 0.2467           | H           | -4.5608          | 0.9751           | 2.4483           |
| H           | -2.179           | -2.9235          | -1.4635          | H           | -5.5923          | -1.2681          | 2.2015           |
| H           | -2.9413          | -3.0393          | 0.114            | H           | -5.8266          | -0.2449          | 0.7934           |
| H           | -1.7521          | 0.5311           | 3.3011           | H           | -1.8561          | 1.4126           | 3.3804           |
| H           | -3.3909          | -0.3974          | -2.6395          | H           | -2.7639          | -2.3108          | 1.825            |
| H           | -3.4311          | -1.9651          | -3.4393          | H           | -4.1389          | -3.3839          | 2.036            |
| H           | -4.9251          | -1.0499          | -3.1981          | H           | -3.0579          | -3.5876          | 0.6488           |
| H           | -6.6804          | 0.4061           | 1.1116           | H           | -2.2332          | -0.2223          | -2.8094          |
| H           | 5.6845           | -2.2246          | 0.3218           | H           | 4.5441           | -3.2709          | 0.3576           |
| H           | -6.5395          | -2.6266          | -2.8016          | H           | -7.0186          | -2.9396          | -1.7191          |
| H           | -6.8324          | -4.204           | -2.0861          | H           | -6.7021          | -1.2953          | -1.1738          |
| <b>4a-5</b> | <b>X axis(Å)</b> | <b>Y axis(Å)</b> | <b>Z axis(Å)</b> | <b>4a-6</b> | <b>X axis(Å)</b> | <b>Y axis(Å)</b> | <b>Z axis(Å)</b> |
| C           | -0.0756          | 5.812            | -0.407           | C           | -2.2195          | 4.895            | -0.4401          |
| C           | -0.4238          | 5.0525           | 0.8732           | C           | -2.0974          | 4.2136           | 0.9232           |
| C           | -0.0271          | 3.5686           | 0.8139           | C           | -1.1593          | 2.9949           | 0.8929           |
| C           | 1.4663           | 3.3925           | 0.4122           | C           | 0.2322           | 3.3693           | 0.3043           |
| C           | 1.7693           | 4.1018           | -0.9599          | C           | 0.0901           | 3.986            | -1.1372          |
| C           | 1.3757           | 5.6001           | -0.8493          | C           | -0.8597          | 5.2137           | -1.0695          |
| C           | 1.9296           | 1.9217           | 0.3715           | C           | 1.2515           | 2.2091           | 0.2964           |
| C           | 3.4244           | 1.787            | 0.0025           | C           | 2.6312           | 2.6615           | -0.2362          |
| C           | 3.7904           | 2.5547           | -1.2761          | C           | 2.5313           | 3.3421           | -1.6089          |
| C           | 3.2919           | 4.0018           | -1.2523          | C           | 1.4874           | 4.4621           | -1.6247          |
| C           | 1.0202           | 3.4896           | -2.1742          | C           | -0.4628          | 2.9983           | -2.1994          |
| C           | -0.3307          | 2.9128           | 2.1403           | C           | -1.0413          | 2.4113           | 2.2834           |
| O           | 0.2626           | 3.1111           | 3.1921           | O           | -0.4454          | 2.9159           | 3.2256           |
| O           | 2.2883           | 4.0514           | 1.4113           | O           | 0.8084           | 4.4069           | 1.143            |
| C           | 3.8104           | 0.3363           | -0.1282          | C           | 3.5986           | 1.5079           | -0.2803          |

|   |         |         |         |   |         |         |         |
|---|---------|---------|---------|---|---------|---------|---------|
| O | 3.0091  | -0.4445 | -0.9542 | O | 3.2144  | 0.4007  | -1.0282 |
| C | 4.8257  | -0.2617 | 0.4901  | C | 4.7698  | 1.4511  | 0.3494  |
| C | 2.9175  | -2.4004 | -3.3133 | C | 3.9994  | -1.6205 | -3.2179 |
| C | 4.0505  | -2.1695 | -2.3122 | C | 4.9068  | -0.8365 | -2.2685 |
| C | 3.535   | -1.7875 | -0.9172 | C | 4.2603  | -0.5866 | -0.8978 |
| C | 2.4933  | -2.8198 | -0.3925 | C | 3.7459  | -1.9109 | -0.2598 |
| C | 1.2902  | -2.9726 | -1.396  | C | 2.7298  | -2.6371 | -1.2175 |
| C | 1.8476  | -3.366  | -2.7921 | C | 3.4222  | -2.8916 | -2.5845 |
| C | 1.9726  | -2.5212 | 1.0327  | C | 3.1344  | -1.732  | 1.15    |
| C | 0.9863  | -3.6046 | 1.5253  | C | 2.6699  | -3.0758 | 1.7555  |
| C | -0.1571 | -3.8609 | 0.5311  | C | 1.7377  | -3.857  | 0.8156  |
| C | 0.3538  | -4.107  | -0.892  | C | 2.3299  | -4.0024 | -0.5909 |
| C | 0.4854  | -3.3276 | 2.9292  | C | 2.0878  | -2.9145 | 3.1462  |
| C | -0.3342 | -2.1201 | 3.221   | C | 0.8617  | -2.1    | 3.3691  |
| C | 0.7483  | -4.137  | 3.9691  | C | 2.6348  | -3.4809 | 4.2352  |
| O | -0.6628 | -1.3    | 2.3718  | O | 0.2641  | -1.5154 | 2.4741  |
| C | 0.4267  | -1.6921 | -1.5572 | C | 1.4235  | -1.8419 | -1.474  |
| C | 4.6951  | -1.6389 | 0.0424  | C | 5.2406  | 0.1179  | 0.0131  |
| O | 5.416   | -2.5421 | 0.4441  | O | 6.2737  | -0.3592 | 0.4628  |
| C | -5.5051 | -2.5733 | -1.1329 | C | -6.8158 | -2.7308 | -0.6286 |
| C | -4.6271 | -1.866  | -0.1293 | C | -6.2076 | -1.4189 | -0.1949 |
| C | -4.5891 | -0.5171 | -0.0033 | C | -4.987  | -0.9981 | -0.6063 |
| C | -5.5457 | 0.3992  | -0.7935 | C | -4.1686 | -1.7817 | -1.6552 |
| C | -6.5493 | -0.3839 | -1.6861 | C | -4.9183 | -3.0242 | -2.2122 |
| C | -3.5774 | 0.2543  | 0.8317  | C | -4.2377 | 0.2011  | -0.0434 |
| C | -2.7172 | 1.1836  | -0.0561 | C | -2.911  | -0.2439 | 0.6083  |
| C | -3.6108 | 2.1031  | -0.9114 | C | -2.0573 | -1.0903 | -0.347  |
| C | -4.6794 | 1.3228  | -1.6855 | C | -2.8526 | -2.2389 | -0.9758 |
| C | -1.6947 | 2.0007  | 0.7064  | C | -2.1327 | 0.9441  | 1.1121  |
| C | -1.4276 | 1.9682  | 2.0111  | C | -1.7309 | 1.1351  | 2.3666  |
| O | -0.9212 | 2.8613  | -0.073  | O | -1.8036 | 1.9194  | 0.1751  |
| C | -6.4114 | 1.2529  | 0.1659  | C | -3.8476 | -0.8957 | -2.8845 |
| C | -3.7793 | -2.7952 | 0.681   | C | -7.0623 | -0.6512 | 0.7631  |
| O | -3.7966 | -4.0124 | 0.5284  | O | -8.1209 | -1.0859 | 1.2043  |
| O | 3.1447  | -4.1167 | -0.3254 | O | 4.878   | -2.8069 | -0.1009 |
| C | -5.9556 | -1.6568 | -2.2638 | C | -5.7796 | -3.7102 | -1.1664 |
| H | -0.7615 | 5.513   | -1.2073 | H | -2.8074 | 4.2621  | -1.1141 |
| H | -0.2491 | 6.883   | -0.2475 | H | -2.7893 | 5.825   | -0.327  |
| H | 0.0752  | 5.541   | 1.7201  | H | -1.7402 | 4.9472  | 1.6572  |
| H | -1.5025 | 5.1517  | 1.0498  | H | -3.102  | 3.9141  | 1.2489  |
| H | 2.0339  | 6.1088  | -0.1328 | H | -0.3906 | 6.0182  | -0.488  |
| H | 1.5323  | 6.1037  | -1.8118 | H | -1.0194 | 5.6233  | -2.0751 |
| H | 1.7956  | 1.4609  | 1.3592  | H | 1.4018  | 1.8379  | 1.3187  |
| H | 1.3038  | 1.3485  | -0.3219 | H | 0.8659  | 1.3634  | -0.2844 |
| H | 4.01    | 2.2229  | 0.8243  | H | 3.0313  | 3.4061  | 0.4667  |
| H | 4.881   | 2.5601  | -1.4019 | H | 3.5065  | 3.7654  | -1.8824 |
| H | 3.3919  | 2.0421  | -2.1602 | H | 2.2951  | 2.6065  | -2.3874 |

|             |                  |                  |                  |             |                  |                  |                  |
|-------------|------------------|------------------|------------------|-------------|------------------|------------------|------------------|
| H           | 3.5261           | 4.4755           | -2.2143          | H           | 1.4167           | 4.8697           | -2.6413          |
| H           | 3.863            | 4.5595           | -0.4989          | H           | 1.8482           | 5.2875           | -0.9975          |
| H           | -0.0568          | 3.6661           | -2.1505          | H           | -1.5124          | 2.7411           | -2.0441          |
| H           | 1.3795           | 3.9363           | -3.1094          | H           | -0.4056          | 3.4425           | -3.2007          |
| H           | 1.1648           | 2.4094           | -2.2597          | H           | 0.0955           | 2.0591           | -2.2343          |
| H           | 2.013            | 3.7337           | 2.2972           | H           | 0.7844           | 4.0987           | 2.0739           |
| H           | 5.5586           | 0.1221           | 1.173            | H           | 5.2628           | 2.1622           | 0.9837           |
| H           | 2.461            | -1.4397          | -3.5764          | H           | 3.1881           | -0.9713          | -3.5653          |
| H           | 3.3372           | -2.7991          | -4.2446          | H           | 4.5688           | -1.8938          | -4.1144          |
| H           | 4.6635           | -3.078           | -2.2532          | H           | 5.8489           | -1.3861          | -2.146           |
| H           | 4.7033           | -1.3799          | -2.706           | H           | 5.1644           | 0.1173           | -2.7466          |
| H           | 2.2825           | -4.3731          | -2.7511          | H           | 4.2367           | -3.6175          | -2.4625          |
| H           | 1.0304           | -3.4207          | -3.5226          | H           | 2.7138           | -3.3494          | -3.2866          |
| H           | 2.8138           | -2.5032          | 1.7379           | H           | 3.8883           | -1.3133          | 1.8295           |
| H           | 1.5177           | -1.5264          | 1.0701           | H           | 2.3139           | -1.0091          | 1.1175           |
| H           | 1.5569           | -4.5443          | 1.571            | H           | 3.5737           | -3.6947          | 1.8602           |
| H           | -0.7385          | -4.7339          | 0.8543           | H           | 1.5564           | -4.8587          | 1.2261           |
| H           | -0.8575          | -3.0207          | 0.5181           | H           | 0.7549           | -3.378           | 0.7488           |
| H           | 0.8762           | -5.0719          | -0.9167          | H           | 3.2022           | -4.6667          | -0.5386          |
| H           | -0.5063          | -4.2167          | -1.5651          | H           | 1.6025           | -4.5164          | -1.2323          |
| H           | -0.6436          | -1.9959          | 4.273            | H           | 0.5079           | -2.0448          | 4.4128           |
| H           | 0.3902           | -3.9421          | 4.9755           | H           | 2.2206           | -3.365           | 5.2324           |
| H           | 1.3389           | -5.0401          | 3.8375           | H           | 3.532            | -4.0896          | 4.1569           |
| H           | 0.9462           | -0.8847          | -2.0767          | H           | 1.5668           | -0.964           | -2.1069          |
| H           | -0.4695          | -1.9073          | -2.1522          | H           | 0.6848           | -2.468           | -1.989           |
| H           | 0.0846           | -1.2891          | -0.6004          | H           | 0.9637           | -1.4933          | -0.5476          |
| H           | -4.9726          | -3.4171          | -1.5878          | H           | -7.3239          | -3.2203          | 0.2108           |
| H           | -6.3788          | -2.9842          | -0.6119          | H           | -7.5754          | -2.5315          | -1.3948          |
| H           | -6.9164          | 0.2535           | -2.5003          | H           | -4.2054          | -3.7451          | -2.6321          |
| H           | -7.4361          | -0.6642          | -1.1004          | H           | -5.5727          | -2.728           | -3.044           |
| H           | -4.1048          | 0.8289           | 1.6023           | H           | -4.0628          | 0.928            | -0.8453          |
| H           | -2.9055          | -0.4068          | 1.378            | H           | -4.8121          | 0.745            | 0.7098           |
| H           | -2.1489          | 0.5422           | -0.7462          | H           | -3.1658          | -0.8809          | 1.4685           |
| H           | -4.0866          | 2.8629           | -0.2792          | H           | -1.6225          | -0.4663          | -1.1372          |
| H           | -2.9988          | 2.6542           | -1.6371          | H           | -1.2118          | -1.5162          | 0.2043           |
| H           | -5.3173          | 2.0393           | -2.2187          | H           | -2.2098          | -2.7532          | -1.7017          |
| H           | -4.1748          | 0.7275           | -2.4582          | H           | -3.0741          | -2.9721          | -0.189           |
| H           | -1.8419          | 1.3798           | 2.8068           | H           | -1.8401          | 0.5214           | 3.2395           |
| H           | -6.9909          | 0.6145           | 0.8437           | H           | -3.2283          | -0.027           | -2.6445          |
| H           | -5.826           | 1.9336           | 0.7899           | H           | -3.3064          | -1.47            | -3.646           |
| H           | -7.1214          | 1.8702           | -0.3974          | H           | -4.7677          | -0.5168          | -3.3453          |
| H           | -3.144           | -2.3472          | 1.4544           | H           | -6.7141          | 0.3483           | 1.0524           |
| H           | 3.9805           | -4.0211          | 0.1775           | H           | 5.5949           | -2.3242          | 0.3618           |
| H           | -6.7023          | -2.1719          | -2.8789          | H           | -6.2869          | -4.5752          | -1.6088          |
| H           | -5.1103          | -1.4206          | -2.9211          | H           | -5.1574          | -4.0916          | -0.3481          |
| <b>4a-7</b> | <b>X axis(Å)</b> | <b>Y axis(Å)</b> | <b>Z axis(Å)</b> | <b>4a-8</b> | <b>X axis(Å)</b> | <b>Y axis(Å)</b> | <b>Z axis(Å)</b> |
| C           | -1.5638          | 5.5763           | -0.5137          | C           | -2.0834          | 5.4253           | -0.502           |



|   |         |         |         |   |         |         |         |
|---|---------|---------|---------|---|---------|---------|---------|
| C | -1.5613 | 4.9312  | 0.8727  | C | -1.9861 | 4.7973  | 0.8893  |
| C | -0.909  | 3.5388  | 0.8753  | C | -1.2268 | 3.4604  | 0.8788  |
| C | 0.517   | 3.5822  | 0.2518  | C | 0.1731  | 3.6145  | 0.2142  |
| C | 0.4784  | 4.1651  | -1.2102 | C | 0.0456  | 4.1758  | -1.2511 |
| C | -0.1821 | 5.571   | -1.1752 | C | -0.7274 | 5.5233  | -1.2088 |
| C | 1.2635  | 2.2295  | 0.2732  | C | 1.0344  | 2.3316  | 0.229   |
| C | 2.696   | 2.3577  | -0.2954 | C | 2.4357  | 2.5813  | -0.3757 |
| C | 2.7122  | 2.9928  | -1.693  | C | 2.3574  | 3.1876  | -1.7836 |
| C | 1.9336  | 4.3104  | -1.7374 | C | 1.4684  | 4.4342  | -1.8227 |
| C | -0.299  | 3.2843  | -2.2248 | C | -0.6844 | 3.2229  | -2.235  |
| C | -0.8879 | 2.9902  | 2.2831  | C | -1.1183 | 2.9202  | 2.2857  |
| O | -0.1855 | 3.3935  | 3.201   | O | -0.4346 | 3.3906  | 3.1854  |
| O | 1.3235  | 4.4987  | 1.0425  | O | 0.9178  | 4.607   | 0.974   |
| C | 3.4009  | 1.0263  | -0.3037 | C | 3.2672  | 1.3256  | -0.3735 |
| O | 2.7824  | -0.0045 | -1.0023 | O | 2.7382  | 0.2207  | -1.0306 |
| C | 4.5479  | 0.7522  | 0.3135  | C | 4.4499  | 1.1827  | 0.2201  |
| C | 3.1046  | -2.2134 | -3.1321 | C | 3.2451  | -2.0009 | -3.1214 |
| C | 4.167   | -1.5963 | -2.2212 | C | 4.253   | -1.2502 | -2.2502 |
| C | 3.6095  | -1.1785 | -0.8521 | C | 3.6833  | -0.8609 | -0.8777 |
| C | 2.8515  | -2.3515 | -0.1631 | C | 3.0676  | -2.0895 | -0.1442 |
| C | 1.6933  | -2.8882 | -1.0834 | C | 1.9605  | -2.775  | -1.0261 |
| C | 2.2957  | -3.3214 | -2.4479 | C | 2.5801  | -3.1741 | -2.3929 |
| C | 2.3154  | -2.0089 | 1.2473  | C | 2.5188  | -1.7655 | 1.2657  |
| C | 1.602   | -3.2123 | 1.9039  | C | 1.9487  | -3.0179 | 1.9686  |
| C | 0.5119  | -3.8138 | 1.0028  | C | 0.9245  | -3.7697 | 1.1037  |
| C | 1.036   | -4.1226 | -0.4043 | C | 1.4582  | -4.0566 | -0.3041 |
| C | 1.0949  | -2.8966 | 3.2976  | C | 1.4202  | -2.7116 | 3.3565  |
| C | 0.0674  | -1.8415 | 3.5143  | C | 0.2776  | -1.7763 | 3.5487  |
| C | 1.5382  | -3.5325 | 4.3953  | C | 1.9442  | -3.2508 | 4.4704  |
| O | -0.4227 | -1.1768 | 2.6103  | O | -0.295  | -1.2033 | 2.6304  |
| C | 0.5709  | -1.8542 | -1.3543 | C | 0.7259  | -1.8782 | -1.2949 |
| C | 4.7292  | -0.6599 | 0.0221  | C | 4.764   | -0.2112 | -0.0425 |
| O | 5.6505  | -1.3237 | 0.4779  | O | 5.7572  | -0.7671 | 0.4074  |
| C | -4.5742 | -2.6535 | -2.7083 | C | -4.6184 | -2.8697 | -2.7035 |
| C | -3.6684 | -1.5992 | -2.1313 | C | -3.7283 | -1.7861 | -2.1557 |
| C | -3.5604 | -1.3276 | -0.8105 | C | -3.545  | -1.5477 | -0.8359 |
| C | -4.4362 | -2.0404 | 0.2318  | C | -4.253  | -2.3908 | 0.2379  |
| C | -5.6027 | -2.8246 | -0.4333 | C | -5.3949 | -3.2602 | -0.3609 |
| C | -2.5796 | -0.3253 | -0.2207 | C | -2.6409 | -0.4538 | -0.2842 |
| C | -3.2761 | 0.7164  | 0.6698  | C | -3.3517 | 0.4456  | 0.7441  |
| C | -4.0748 | 0.0071  | 1.7771  | C | -3.9547 | -0.4072 | 1.8708  |
| C | -5.0718 | -0.9941 | 1.1871  | C | -4.8981 | -1.4704 | 1.3076  |
| C | -2.2722 | 1.726   | 1.1779  | C | -2.4209 | 1.5382  | 1.2207  |
| C | -1.8141 | 1.8785  | 2.4191  | C | -1.9315 | 1.7262  | 2.4449  |
| O | -1.7832 | 2.6035  | 0.2117  | O | -2.0487 | 2.4598  | 0.2429  |
| C | -3.5719 | -3.037  | 1.0389  | C | -3.2195 | -3.3282 | 0.9049  |
| C | -2.877  | -0.8763 | -3.1695 | C | -3.0396 | -1.0134 | -3.2335 |

|   |         |         |         |   |         |         |         |
|---|---------|---------|---------|---|---------|---------|---------|
| O | -2.7721 | 0.3422  | -3.2182 | O | -1.8554 | -0.7069 | -3.2125 |
| O | 3.783   | -3.4525 | 0.0133  | O | 4.1161  | -3.0783 | 0.0455  |
| C | -5.1503 | -3.6018 | -1.6624 | C | -4.9945 | -3.9249 | -1.6704 |
| H | -2.2898 | 5.0636  | -1.1544 | H | -2.7856 | 4.8492  | -1.1148 |
| H | -1.9163 | 6.6111  | -0.4276 | H | -2.515  | 6.4295  | -0.4132 |
| H | -1.038  | 5.5949  | 1.5729  | H | -1.4952 | 5.5068  | 1.5676  |
| H | -2.5992 | 4.8671  | 1.2241  | H | -3.0039 | 4.6548  | 1.2746  |
| H | 0.4629  | 6.274   | -0.6321 | H | -0.1254 | 6.2838  | -0.6944 |
| H | -0.2726 | 5.9708  | -2.1933 | H | -0.8827 | 5.9014  | -2.2274 |
| H | 1.3531  | 1.8698  | 1.3067  | H | 1.1804  | 1.9923  | 1.2629  |
| H | 0.6941  | 1.4668  | -0.2701 | H | 0.522   | 1.5162  | -0.2942 |
| H | 3.2589  | 3.0272  | 0.3707  | H | 2.947   | 3.3152  | 0.2635  |
| H | 3.7487  | 3.1855  | -1.9988 | H | 3.364   | 3.4619  | -2.1246 |
| H | 2.3046  | 2.2973  | -2.4368 | H | 1.988   | 2.4459  | -2.5021 |
| H | 1.9286  | 4.6875  | -2.7682 | H | 1.403   | 4.7937  | -2.8577 |
| H | 2.4782  | 5.0601  | -1.1489 | H | 1.9638  | 5.2359  | -1.2599 |
| H | -1.3754 | 3.266   | -2.0437 | H | -1.7512 | 3.1226  | -2.026  |
| H | -0.1707 | 3.6706  | -3.2434 | H | -0.6128 | 3.6043  | -3.261  |
| H | 0.0424  | 2.2458  | -2.2317 | H | -0.2616 | 2.2148  | -2.2386 |
| H | 1.2442  | 4.2407  | 1.9852  | H | 0.8981  | 4.3462  | 1.919   |
| H | 5.1894  | 1.3696  | 0.912   | H | 5.0404  | 1.8758  | 0.7873  |
| H | 2.4338  | -1.4265 | -3.4943 | H | 2.4836  | -1.3013 | -3.4833 |
| H | 3.592   | -2.6247 | -4.0243 | H | 3.7548  | -2.3776 | -4.0162 |
| H | 4.9827  | -2.3191 | -2.0907 | H | 5.1445  | -1.8778 | -2.1229 |
| H | 4.6009  | -0.7292 | -2.7355 | H | 4.5795  | -0.3545 | -2.7941 |
| H | 2.9498  | -4.192  | -2.3093 | H | 3.3305  | -3.9621 | -2.2484 |
| H | 1.4971  | -3.6498 | -3.1254 | H | 1.81    | -3.6072 | -3.044  |
| H | 3.1508  | -1.7297 | 1.9027  | H | 3.3293  | -1.3794 | 1.8978  |
| H | 1.6561  | -1.1371 | 1.2002  | H | 1.7695  | -0.9704 | 1.2071  |
| H | 2.3636  | -3.9987 | 2.0152  | H | 2.7944  | -3.7101 | 2.0966  |
| H | 0.1341  | -4.7422 | 1.45    | H | 0.6651  | -4.7222 | 1.5834  |
| H | -0.3503 | -3.1427 | 0.9299  | H | -0.0115 | -3.2073 | 1.028   |
| H | 1.7559  | -4.9486 | -0.3386 | H | 2.2677  | -4.7943 | -0.2308 |
| H | 0.2073  | -4.498  | -1.0184 | H | 0.6676  | -4.5394 | -0.8928 |
| H | -0.24   | -1.6817 | 4.5619  | H | -0.038  | -1.6178 | 4.594   |
| H | 1.1788  | -3.306  | 5.3947  | H | 1.5696  | -3.0313 | 5.4656  |
| H | 2.2903  | -4.3139 | 4.3223  | H | 2.7818  | -3.9415 | 4.4148  |
| H | 0.8754  | -1.0461 | -2.0223 | H | 0.9295  | -1.0521 | -1.9789 |
| H | -0.2891 | -2.3357 | -1.8346 | H | -0.0813 | -2.462  | -1.7533 |
| H | 0.2119  | -1.3875 | -0.4358 | H | 0.3286  | -1.4395 | -0.3784 |
| H | -5.3981 | -2.1506 | -3.2307 | H | -5.5315 | -2.4031 | -3.0949 |
| H | -4.0392 | -3.2497 | -3.4573 | H | -4.13   | -3.3718 | -3.5477 |
| H | -6.3976 | -2.1317 | -0.742  | H | -6.2815 | -2.6401 | -0.5523 |
| H | -6.0619 | -3.5122 | 0.288   | H | -5.7097 | -4.0265 | 0.3586  |
| H | -1.8461 | -0.8789 | 0.3759  | H | -1.7708 | -0.9263 | 0.1838  |
| H | -1.9899 | 0.1818  | -0.9888 | H | -2.2478 | 0.1854  | -1.0788 |
| H | -3.9983 | 1.2709  | 0.0526  | H | -4.1879 | 0.948   | 0.2355  |

|             |                  |                  |                  |              |                  |                  |                  |
|-------------|------------------|------------------|------------------|--------------|------------------|------------------|------------------|
| H           | -3.4034          | -0.5125          | 2.4709           | H            | -3.167           | -0.8886          | 2.4617           |
| H           | -4.6264          | 0.7465           | 2.3713           | H            | -4.518           | 0.2316           | 2.5628           |
| H           | -5.5935          | -1.5034          | 2.0074           | H            | -5.289           | -2.0749          | 2.1362           |
| H           | -5.8376          | -0.4204          | 0.6468           | H            | -5.7636          | -0.9511          | 0.8731           |
| H           | -2.0143          | 1.331            | 3.319            | H            | -2.0492          | 1.16             | 3.348            |
| H           | -2.7938          | -2.5392          | 1.6248           | H            | -2.4352          | -2.7771          | 1.4317           |
| H           | -4.1867          | -3.6059          | 1.7459           | H            | -3.7004          | -3.9821          | 1.6415           |
| H           | -3.0661          | -3.7563          | 0.3854           | H            | -2.7187          | -3.9683          | 0.1702           |
| H           | -2.4221          | -1.5258          | -3.9362          | H            | -3.6796          | -0.771           | -4.0989          |
| H           | 4.5915           | -3.1084          | 0.4483           | H            | 4.8919           | -2.6348          | 0.4484           |
| H           | -4.4023          | -4.3537          | -1.3855          | H            | -4.1549          | -4.6111          | -1.5108          |
| H           | -5.9977          | -4.1488          | -2.0916          | H            | -5.825           | -4.5306          | -2.0512          |
| <b>4a-9</b> | <b>X axis(Å)</b> | <b>Y axis(Å)</b> | <b>Z axis(Å)</b> | <b>4a-10</b> | <b>X axis(Å)</b> | <b>Y axis(Å)</b> | <b>Z axis(Å)</b> |
| C           | -2.3674          | 4.7683           | -0.5394          | C            | 4.1515           | -4.1217          | 0.7297           |
| C           | -2.2339          | 4.1147           | 0.8362           | C            | 3.5944           | -3.9281          | -0.6805          |
| C           | -1.2533          | 2.9295           | 0.8356           | C            | 2.7463           | -2.653           | -0.8153          |
| C           | 0.1294           | 3.3414           | 0.2509           | C            | 3.5182           | -1.3986          | -0.3104          |
| C           | -0.0217          | 3.9295           | -1.2017          | C            | 4.0056           | -1.5884          | 1.1736           |
| C           | -1.0139          | 5.1244           | -1.162           | C            | 4.8686           | -2.8768          | 1.2606           |
| C           | 1.1872           | 2.2161           | 0.2689           | C            | 2.73             | -0.0785          | -0.4486          |
| C           | 2.5551           | 2.7063           | -0.2602          | C            | 3.5615           | 1.1427           | 0.0057           |
| C           | 2.4442           | 3.3634           | -1.6436          | C            | 4.1518           | 0.9648           | 1.4127           |
| C           | 1.3623           | 4.446            | -1.6857          | C            | 4.884            | -0.3701          | 1.5755           |
| C           | -0.5311          | 2.9062           | -2.2518          | C            | 2.8557           | -1.7001          | 2.2105           |
| C           | -1.1262          | 2.3778           | 2.2383           | C            | 2.2991           | -2.4954          | -2.2503          |
| O           | -0.5446          | 2.9173           | 3.1706           | O            | 3.0033           | -2.1619          | -3.1931          |
| O           | 0.6649           | 4.4117           | 1.0762           | O            | 4.7122           | -1.2474          | -1.1217          |
| C           | 3.5605           | 1.5848           | -0.2801          | C            | 2.731            | 2.3966           | -0.0811          |
| O           | 3.2277           | 0.4627           | -1.0305          | O            | 1.6368           | 2.4788           | 0.7737           |
| C           | 4.7209           | 1.5695           | 0.3717           | C            | 2.9364           | 3.4092           | -0.9197          |
| C           | 4.1222           | -1.5344          | -3.1995          | C            | 0.2013           | 4.2374           | 2.8892           |
| C           | 4.9843           | -0.7182          | -2.2353          | C            | 1.0933           | 4.6644           | 1.7232           |
| C           | 4.3039           | -0.488           | -0.8776          | C            | 0.9769           | 3.7365           | 0.5041           |
| C           | 3.8234           | -1.828           | -0.246           | C            | -0.5057          | 3.5296           | 0.0775           |
| C           | 2.8514           | -2.5909          | -1.2207          | C            | -1.365           | 2.9838           | 1.2769           |
| C           | 3.5778           | -2.8237          | -2.5739          | C            | -1.2482          | 3.9727           | 2.4683           |
| C           | 3.1795           | -1.6668          | 1.1511           | C            | -0.6751          | 2.6168           | -1.1589          |
| C           | 2.7476           | -3.0237          | 1.752            | C            | -2.155           | 2.4716           | -1.5955          |
| C           | 1.8638           | -3.8408          | 0.7957           | C            | -3.0422          | 2.0288           | -0.4173          |
| C           | 2.4884           | -3.9682          | -0.5982          | C            | -2.8494          | 2.899            | 0.8293           |
| C           | 2.1275           | -2.8768          | 3.128            | C            | -2.3566          | 1.5583           | -2.7973          |
| C           | 0.8704           | -2.1015          | 3.3152           | C            | -3.6238          | 1.7258           | -3.572           |
| C           | 2.6653           | -3.4209          | 4.2328           | C            | -1.4985          | 0.639            | -3.2721          |
| O           | 0.2815           | -1.538           | 2.4014           | O            | -4.4929          | 2.5326           | -3.2683          |
| C           | 1.5228           | -1.8426          | -1.5035          | C            | -0.9498          | 1.5746           | 1.7772           |
| C           | 5.2424           | 0.2517           | 0.0493           | C            | 1.8141           | 4.2865           | -0.6301          |
| O           | 6.2827           | -0.1885          | 0.5193           | O            | 1.5816           | 5.3021           | -1.2706          |

|   |         |         |         |   |         |         |         |
|---|---------|---------|---------|---|---------|---------|---------|
| C | -7.0626 | -2.6684 | -0.7077 | C | -4.4946 | -2.4304 | 2.7036  |
| C | -6.2808 | -1.516  | -0.1363 | C | -3.1133 | -2.1924 | 2.1362  |
| C | -5.0213 | -1.1928 | -0.5096 | C | -2.8027 | -2.3409 | 0.8242  |
| C | -4.2288 | -2.0585 | -1.5044 | C | -3.8534 | -2.8296 | -0.196  |
| C | -4.9326 | -3.4174 | -1.7819 | C | -5.1198 | -3.4068 | 0.4945  |
| C | -4.2628 | 0.0266  | -0.0057 | C | -1.438  | -2.0568 | 0.2108  |
| C | -2.9101 | -0.3622 | 0.6121  | C | -0.8919 | -3.2476 | -0.5983 |
| C | -2.0693 | -1.161  | -0.3929 | C | -1.9003 | -3.6495 | -1.6847 |
| C | -2.8295 | -2.3814 | -0.9142 | C | -3.2633 | -3.9693 | -1.0706 |
| C | -2.1652 | 0.8568  | 1.0903  | C | 0.4923  | -2.9341 | -1.1198 |
| C | -1.7821 | 1.0865  | 2.3444  | C | 0.8754  | -2.7594 | -2.383  |
| O | -1.8511 | 1.8182  | 0.1332  | O | 1.4811  | -2.8366 | -0.1404 |
| C | -4.0755 | -1.3024 | -2.8444 | C | -4.2825 | -1.6481 | -1.0968 |
| C | -7.038  | -0.7486 | 0.8958  | C | -2.127  | -1.7665 | 3.1802  |
| O | -6.5575 | -0.3885 | 1.9628  | O | -2.4206 | -1.6672 | 4.367   |
| O | 4.9828  | -2.684  | -0.063  | O | -1.0601 | 4.8195  | -0.2783 |
| C | -6.4364 | -3.2636 | -1.9641 | C | -5.5896 | -2.5396 | 1.6505  |
| H | -2.9265 | 4.1039  | -1.2076 | H | 3.34    | -4.4078 | 1.4079  |
| H | -2.9706 | 5.6794  | -0.4471 | H | 4.8523  | -4.9651 | 0.7262  |
| H | -1.9092 | 4.8728  | 1.5603  | H | 4.4309  | -3.8997 | -1.3907 |
| H | -3.2303 | 3.7858  | 1.1584  | H | 2.9983  | -4.8126 | -0.9393 |
| H | -0.5783 | 5.9537  | -0.5895 | H | 5.7982  | -2.7443 | 0.6919  |
| H | -1.1784 | 5.5123  | -2.1754 | H | 5.1743  | -3.0571 | 2.2992  |
| H | 1.3415  | 1.8662  | 1.2981  | H | 2.4596  | 0.0836  | -1.5005 |
| H | 0.8353  | 1.3486  | -0.3011 | H | 1.7854  | -0.1337 | 0.105   |
| H | 2.9248  | 3.4739  | 0.4345  | H | 4.4068  | 1.2478  | -0.6892 |
| H | 3.4067  | 3.8161  | -1.9149 | H | 4.8545  | 1.7818  | 1.622   |
| H | 2.2406  | 2.609   | -2.4134 | H | 3.367   | 1.0444  | 2.1748  |
| H | 1.2862  | 4.8348  | -2.7093 | H | 5.2172  | -0.4693 | 2.6166  |
| H | 1.6892  | 5.2933  | -1.0691 | H | 5.7999  | -0.3447 | 0.9711  |
| H | -1.5716 | 2.6132  | -2.0988 | H | 2.2729  | -2.6176 | 2.1099  |
| H | -0.4833 | 3.3367  | -3.2595 | H | 3.2603  | -1.7071 | 3.23    |
| H | 0.0612  | 1.9875  | -2.2686 | H | 2.1509  | -0.8664 | 2.1529  |
| H | 0.6356  | 4.1197  | 2.0123  | H | 4.4561  | -1.2729 | -2.0679 |
| H | 5.1776  | 2.2991  | 1.012   | H | 3.6885  | 3.5618  | -1.6696 |
| H | 3.2955  | -0.9142 | -3.5632 | H | 0.6249  | 3.3462  | 3.3651  |
| H | 4.7171  | -1.7893 | -4.0848 | H | 0.2142  | 5.021   | 3.6564  |
| H | 5.9421  | -1.2352 | -2.0937 | H | 0.8299  | 5.6912  | 1.438   |
| H | 5.2183  | 0.2429  | -2.7109 | H | 2.1315  | 4.6977  | 2.0776  |
| H | 4.4146  | -3.5205 | -2.4349 | H | -1.7152 | 4.9315  | 2.2083  |
| H | 2.899   | -3.3071 | -3.288  | H | -1.8063 | 3.5907  | 3.3327  |
| H | 3.9057  | -1.222  | 1.844   | H | -0.1249 | 3.0413  | -2.0086 |
| H | 2.3369  | -0.971  | 1.1003  | H | -0.2346 | 1.6351  | -0.9555 |
| H | 3.6695  | -3.6106 | 1.8802  | H | -2.4859 | 3.474   | -1.9026 |
| H | 1.7108  | -4.8473 | 1.2059  | H | -4.1007 | 2.0699  | -0.7013 |
| H | 0.8655  | -3.3985 | 0.7076  | H | -2.8409 | 0.9804  | -0.1699 |
| H | 3.3826  | -4.6009 | -0.5269 | H | -3.2436 | 3.9023  | 0.6226  |

|              |                  |                  |                  |   |         |         |         |
|--------------|------------------|------------------|------------------|---|---------|---------|---------|
| H            | 1.7926           | -4.5094          | -1.2523          | H | -3.4683 | 2.4975  | 1.6421  |
| H            | 0.4857           | -2.0555          | 4.3484           | H | -3.7407 | 1.0697  | -4.4511 |
| H            | 2.2224           | -3.3141          | 5.2185           | H | -1.7151 | 0.0427  | -4.1544 |
| H            | 3.5834           | -4.0003          | 4.1795           | H | -0.5405 | 0.4475  | -2.802  |
| H            | 1.6474           | -0.9606          | -2.1348          | H | 0.0216  | 1.559   | 2.275   |
| H            | 0.8167           | -2.4948          | -2.0316          | H | -1.673  | 1.204   | 2.5134  |
| H            | 1.0329           | -1.5099          | -0.5868          | H | -0.9051 | 0.8385  | 0.9722  |
| H            | -7.1402          | -3.4477          | 0.0612           | H | -4.4696 | -3.3559 | 3.2933  |
| H            | -8.0857          | -2.3548          | -0.9481          | H | -4.7717 | -1.6201 | 3.3892  |
| H            | -4.7608          | -4.1113          | -0.9475          | H | -4.9143 | -4.4132 | 0.8844  |
| H            | -4.5016          | -3.8978          | -2.6693          | H | -5.9335 | -3.5226 | -0.2324 |
| H            | -4.1113          | 0.71             | -0.8516          | H | -1.5246 | -1.1775 | -0.4402 |
| H            | -4.8348          | 0.6113           | 0.7195           | H | -0.6951 | -1.7802 | 0.9605  |
| H            | -3.1078          | -1.0121          | 1.477            | H | -0.7849 | -4.1054 | 0.082   |
| H            | -1.7595          | -0.5294          | -1.2344          | H | -2.0093 | -2.8535 | -2.4309 |
| H            | -1.1493          | -1.5042          | 0.0918           | H | -1.5389 | -4.5353 | -2.2222 |
| H            | -2.2127          | -2.8924          | -1.6646          | H | -3.9646 | -4.2264 | -1.875  |
| H            | -2.9377          | -3.0853          | -0.0771          | H | -3.1492 | -4.8778 | -0.4628 |
| H            | -1.8924          | 0.491            | 3.2295           | H | 0.3258  | -2.781  | -3.3041 |
| H            | -3.4965          | -0.3792          | -2.743           | H | -3.4529 | -1.2523 | -1.6888 |
| H            | -3.5584          | -1.9217          | -3.5865          | H | -5.0608 | -1.9562 | -1.8044 |
| H            | -5.0483          | -1.0244          | -3.2647          | H | -4.6814 | -0.8142 | -0.5095 |
| H            | -8.097           | -0.5642          | 0.6487           | H | -1.1057 | -1.5455 | 2.8482  |
| H            | 5.672            | -2.1759          | 0.4142           | H | -0.4716 | 5.2499  | -0.9333 |
| H            | -6.6538          | -2.6274          | -2.8298          | H | -5.8698 | -1.5417 | 1.2945  |
| H            | -6.8897          | -4.2397          | -2.1719          | H | -6.4897 | -2.9728 | 2.1018  |
| <b>4a-11</b> | <b>X axis(Å)</b> | <b>Y axis(Å)</b> | <b>Z axis(Å)</b> |   |         |         |         |
| C            | -0.9518          | 5.5836           | -1.3163          |   |         |         |         |
| C            | -1.4516          | 5.0971           | 0.0422           |   |         |         |         |
| C            | -0.8774          | 3.7264           | 0.4377           |   |         |         |         |
| C            | 0.6754           | 3.6942           | 0.3289           |   |         |         |         |
| C            | 1.1622           | 4.1338           | -1.1001          |   |         |         |         |
| C            | 0.5732           | 5.5314           | -1.4326          |   |         |         |         |
| C            | 1.3001           | 2.3323           | 0.7059           |   |         |         |         |
| C            | 2.8422           | 2.3691           | 0.66             |   |         |         |         |
| C            | 3.3885           | 2.9318           | -0.6657          |   |         |         |         |
| C            | 2.7129           | 4.2384           | -1.0878          |   |         |         |         |
| C            | 0.7593           | 3.1543           | -2.2342          |   |         |         |         |
| C            | -1.3424          | 3.3882           | 1.8344           |   |         |         |         |
| O            | -0.9531          | 3.9081           | 2.8714           |   |         |         |         |
| O            | 1.2132           | 4.6704           | 1.2607           |   |         |         |         |
| C            | 3.4073           | 1.0009           | 0.9533           |   |         |         |         |
| O            | 3.5028           | 0.1167           | -0.1182          |   |         |         |         |
| C            | 3.825            | 0.5684           | 2.1412           |   |         |         |         |
| C            | 5.7742           | -1.2565          | -1.6924          |   |         |         |         |
| C            | 5.6889           | -0.9632          | -0.196           |   |         |         |         |
| C            | 4.2485           | -1.0298          | 0.3453           |   |         |         |         |

|   |         |         |         |  |  |  |  |
|---|---------|---------|---------|--|--|--|--|
| C | 3.5646  | -2.3777 | -0.0224 |  |  |  |  |
| C | 3.5936  | -2.6205 | -1.5787 |  |  |  |  |
| C | 5.0628  | -2.5552 | -2.0783 |  |  |  |  |
| C | 2.1231  | -2.526  | 0.5192  |  |  |  |  |
| C | 1.5154  | -3.9044 | 0.1648  |  |  |  |  |
| C | 1.6196  | -4.2409 | -1.3329 |  |  |  |  |
| C | 3.0337  | -4.0377 | -1.8801 |  |  |  |  |
| C | 0.0987  | -4.0792 | 0.6716  |  |  |  |  |
| C | -1.0073 | -3.2465 | 0.1274  |  |  |  |  |
| C | -0.2461 | -4.9921 | 1.5952  |  |  |  |  |
| O | -0.832  | -2.2585 | -0.5749 |  |  |  |  |
| C | 2.7555  | -1.6002 | -2.395  |  |  |  |  |
| C | 4.2752  | -0.7809 | 1.8368  |  |  |  |  |
| O | 4.6222  | -1.5804 | 2.6953  |  |  |  |  |
| C | -5.691  | -3.414  | 0.008   |  |  |  |  |
| C | -4.9132 | -2.3105 | 0.6815  |  |  |  |  |
| C | -4.8483 | -1.0376 | 0.2211  |  |  |  |  |
| C | -5.6184 | -0.6049 | -1.0412 |  |  |  |  |
| C | -6.1195 | -1.8216 | -1.8687 |  |  |  |  |
| C | -4.0344 | 0.0723  | 0.8725  |  |  |  |  |
| C | -3.1345 | 0.8458  | -0.1168 |  |  |  |  |
| C | -3.9738 | 1.3747  | -1.2876 |  |  |  |  |
| C | -4.7145 | 0.2335  | -1.9813 |  |  |  |  |
| C | -2.3413 | 1.9659  | 0.5248  |  |  |  |  |
| C | -2.318  | 2.3133  | 1.8107  |  |  |  |  |
| O | -1.5103 | 2.6847  | -0.338  |  |  |  |  |
| C | -6.8421 | 0.2375  | -0.6087 |  |  |  |  |
| C | -4.2336 | -2.7504 | 1.9374  |  |  |  |  |
| O | -3.9816 | -3.9275 | 2.1727  |  |  |  |  |
| O | 4.3408  | -3.4489 | 0.5782  |  |  |  |  |
| C | -6.721  | -2.912  | -0.9958 |  |  |  |  |
| H | -1.4143 | 4.9902  | -2.1125 |  |  |  |  |
| H | -1.2886 | 6.6151  | -1.4746 |  |  |  |  |
| H | -1.19   | 5.8459  | 0.8012  |  |  |  |  |
| H | -2.548  | 5.0569  | 0.0112  |  |  |  |  |
| H | 0.9987  | 6.2879  | -0.7603 |  |  |  |  |
| H | 0.8641  | 5.8323  | -2.4472 |  |  |  |  |
| H | 1.0087  | 2.0659  | 1.7306  |  |  |  |  |
| H | 0.9148  | 1.5336  | 0.0612  |  |  |  |  |
| H | 3.182   | 3.0464  | 1.4566  |  |  |  |  |
| H | 4.4686  | 3.1043  | -0.5716 |  |  |  |  |
| H | 3.2748  | 2.2009  | -1.4752 |  |  |  |  |
| H | 3.0811  | 4.5248  | -2.0814 |  |  |  |  |
| H | 3.0377  | 5.0376  | -0.4092 |  |  |  |  |
| H | -0.3191 | 3.1076  | -2.3978 |  |  |  |  |
| H | 1.2022  | 3.4704  | -3.1866 |  |  |  |  |
| H | 1.0971  | 2.1309  | -2.0513 |  |  |  |  |

|             |                  |                  |                  |             |                  |                  |                  |
|-------------|------------------|------------------|------------------|-------------|------------------|------------------|------------------|
| H           | 0.8098           | 4.5208           | 2.1418           |             |                  |                  |                  |
| H           | 3.841            | 1.048            | 3.1005           |             |                  |                  |                  |
| H           | 5.358            | -0.4143          | -2.256           |             |                  |                  |                  |
| H           | 6.8286           | -1.3238          | -1.9861          |             |                  |                  |                  |
| H           | 6.3251           | -1.6777          | 0.3424           |             |                  |                  |                  |
| H           | 6.1207           | 0.03             | -0.0171          |             |                  |                  |                  |
| H           | 5.6354           | -3.398           | -1.6695          |             |                  |                  |                  |
| H           | 5.0963           | -2.6695          | -3.1693          |             |                  |                  |                  |
| H           | 2.1286           | -2.4428          | 1.6139           |             |                  |                  |                  |
| H           | 1.4958           | -1.7078          | 0.1531           |             |                  |                  |                  |
| H           | 2.133            | -4.654           | 0.682            |             |                  |                  |                  |
| H           | 1.3273           | -5.2866          | -1.4955          |             |                  |                  |                  |
| H           | 0.9161           | -3.6411          | -1.9207          |             |                  |                  |                  |
| H           | 3.6904           | -4.8062          | -1.4523          |             |                  |                  |                  |
| H           | 3.0269           | -4.2216          | -2.9622          |             |                  |                  |                  |
| H           | -2.0226          | -3.5701          | 0.4027           |             |                  |                  |                  |
| H           | -1.268           | -5.1159          | 1.9468           |             |                  |                  |                  |
| H           | 0.4964           | -5.6511          | 2.0366           |             |                  |                  |                  |
| H           | 3.1725           | -0.5914          | -2.3816          |             |                  |                  |                  |
| H           | 2.7132           | -1.8976          | -3.45            |             |                  |                  |                  |
| H           | 1.7235           | -1.5235          | -2.0435          |             |                  |                  |                  |
| H           | -4.9797          | -4.0758          | -0.5028          |             |                  |                  |                  |
| H           | -6.2157          | -4.0229          | 0.7546           |             |                  |                  |                  |
| H           | -5.287           | -2.2611          | -2.4354          |             |                  |                  |                  |
| H           | -6.8581          | -1.4989          | -2.6133          |             |                  |                  |                  |
| H           | -4.7329          | 0.7612           | 1.3651           |             |                  |                  |                  |
| H           | -3.3837          | -0.3188          | 1.6588           |             |                  |                  |                  |
| H           | -2.3992          | 0.1357           | -0.5217          |             |                  |                  |                  |
| H           | -4.6821          | 2.1368           | -0.941           |             |                  |                  |                  |
| H           | -3.3298          | 1.8668           | -2.0275          |             |                  |                  |                  |
| H           | -5.3109          | 0.6458           | -2.8055          |             |                  |                  |                  |
| H           | -3.9617          | -0.4185          | -2.446           |             |                  |                  |                  |
| H           | -2.8272          | 1.9182           | 2.6681           |             |                  |                  |                  |
| H           | -6.5541          | 1.1529           | -0.0818          |             |                  |                  |                  |
| H           | -7.4374          | 0.5398           | -1.478           |             |                  |                  |                  |
| H           | -7.5011          | -0.3203          | 0.0655           |             |                  |                  |                  |
| H           | -3.9582          | -1.9641          | 2.6542           |             |                  |                  |                  |
| H           | 4.437            | -3.2586          | 1.5355           |             |                  |                  |                  |
| H           | -7.6067          | -2.5377          | -0.4701          |             |                  |                  |                  |
| H           | -7.0598          | -3.7463          | -1.6209          |             |                  |                  |                  |
| <b>4b-1</b> | <b>X axis(Å)</b> | <b>Y axis(Å)</b> | <b>Z axis(Å)</b> | <b>4b-2</b> | <b>X axis(Å)</b> | <b>Y axis(Å)</b> | <b>Z axis(Å)</b> |
| C           | -2.4491          | 5.2487           | -0.2917          | C           | -2.3402          | 5.2771           | -0.2427          |
| C           | -2.278           | 4.566            | 1.0653           | C           | -2.2106          | 4.5649           | 1.1036           |
| C           | -1.3876          | 3.3126           | 0.9909           | C           | -1.3369          | 3.3005           | 1.0241           |
| C           | -0.0186          | 3.6333           | 0.3265           | C           | 0.0517           | 3.6134           | 0.3974           |
| C           | -0.2174          | 4.2521           | -1.1082          | C           | -0.1048          | 4.2639           | -1.0283          |
| C           | -1.1147          | 5.5151           | -0.9943          | C           | -0.986           | 5.5377           | -0.9089          |

|   |         |         |         |   |         |         |         |
|---|---------|---------|---------|---|---------|---------|---------|
| C | 0.9538  | 2.4352  | 0.2673  | C | 1.0067  | 2.4014  | 0.3352  |
| C | 2.3164  | 2.8367  | -0.3427 | C | 2.3891  | 2.7927  | -0.2357 |
| C | 2.1661  | 3.5151  | -1.7117 | C | 2.281   | 3.5034  | -1.5924 |
| C | 1.1669  | 4.674   | -1.6749 | C | 1.2983  | 4.6764  | -1.554  |
| C | -0.8652 | 3.2837  | -2.1341 | C | -0.7427 | 3.3264  | -2.0885 |
| C | -1.2258 | 2.7286  | 2.3768  | C | -1.2137 | 2.6871  | 2.4013  |
| O | -0.5342 | 3.1894  | 3.2748  | O | -0.5402 | 3.1236  | 3.3248  |
| O | 0.6402  | 4.6499  | 1.1289  | O | 0.7077  | 4.6031  | 1.2349  |
| C | 3.2447  | 1.6551  | -0.4366 | C | 3.2981  | 1.5967  | -0.336  |
| O | 2.7708  | 0.5373  | -1.1154 | O | 2.8249  | 0.5092  | -1.0626 |
| C | 4.4672  | 1.5897  | 0.0856  | C | 4.5026  | 1.4918  | 0.2206  |
| C | 3.3434  | -1.4768 | -3.3734 | C | 3.433   | -1.4311 | -3.3739 |
| C | 4.3371  | -0.6967 | -2.5126 | C | 4.4131  | -0.701  | -2.4554 |
| C | 3.8216  | -0.4537 | -1.0862 | C | 3.8581  | -0.5001 | -1.0372 |
| C | 3.3712  | -1.7799 | -0.4058 | C | 3.3652  | -1.842  | -0.42   |
| C | 2.2849  | -2.5217 | -1.2687 | C | 2.2918  | -2.5307 | -1.3414 |
| C | 2.8496  | -2.7592 | -2.6962 | C | 2.895   | -2.7272 | -2.7593 |
| C | 2.875   | -1.5993 | 1.0473  | C | 2.8304  | -1.7067 | 1.0245  |
| C | 2.4849  | -2.9444 | 1.7     | C | 2.3976  | -3.0683 | 1.6135  |
| C | 1.5183  | -3.7719 | 0.8386  | C | 1.4381  | -3.8411 | 0.6949  |
| C | 1.9808  | -3.8989 | -0.6154 | C | 1.9419  | -3.9243 | -0.7487 |
| C | 1.9783  | -2.766  | 3.1186  | C | 1.8589  | -2.9383 | 3.0253  |
| C | 0.7309  | -1.9982 | 3.3927  | C | 0.6242  | -2.1516 | 3.302   |
| C | 2.611   | -3.2794 | 4.1872  | C | 2.4508  | -3.5134 | 4.0859  |
| O | 0.0555  | -1.4613 | 2.5222  | O | -0.0123 | -1.5573 | 2.4396  |
| C | 0.9414  | -1.7547 | -1.3967 | C | 0.9674  | -1.7332 | -1.4805 |
| C | 4.8863  | 0.2453  | -0.2701 | C | 4.9082  | 0.1513  | -0.1649 |
| O | 5.9485  | -0.2404 | 0.0943  | O | 5.949   | -0.3665 | 0.2165  |
| C | -4.3049 | -4.3422 | -0.759  | C | -4.6087 | -4.143  | -0.6635 |
| C | -3.4224 | -3.2534 | -0.1955 | C | -3.5451 | -3.1521 | -0.258  |
| C | -3.6067 | -1.9332 | -0.44   | C | -3.5826 | -1.8423 | -0.6038 |
| C | -4.8314 | -1.4283 | -1.23   | C | -4.7141 | -1.2651 | -1.4787 |
| C | -5.8836 | -2.5476 | -1.4687 | C | -5.6929 | -2.3499 | -2.0081 |
| C | -2.6765 | -0.8155 | 0.0164  | C | -2.6225 | -0.7724 | -0.1053 |
| C | -3.42   | 0.2371  | 0.8512  | C | -3.3817 | 0.2404  | 0.7703  |
| C | -4.6173 | 0.8023  | 0.0695  | C | -4.6016 | 0.8286  | 0.0329  |
| C | -5.5439 | -0.3116 | -0.4179 | C | -5.4913 | -0.2546 | -0.5925 |
| C | -2.4905 | 1.3399  | 1.2881  | C | -2.463  | 1.3319  | 1.2544  |
| C | -2.0164 | 1.5166  | 2.5195  | C | -2.0144 | 1.4775  | 2.4993  |
| O | -2.1049 | 2.2571  | 0.3145  | O | -2.0533 | 2.2692  | 0.3104  |
| C | -4.3788 | -0.8827 | -2.6043 | C | -4.1571 | -0.5524 | -2.7355 |
| C | -2.3265 | -3.7786 | 0.6761  | C | -2.4916 | -3.7393 | 0.626   |
| O | -2.1105 | -4.9778 | 0.8191  | O | -2.4164 | -4.9414 | 0.8596  |
| O | 4.521   | -2.6652 | -0.3401 | O | 4.497   | -2.7501 | -0.3549 |
| C | -5.239  | -3.8658 | -1.8645 | C | -5.931  | -3.4716 | -1.0124 |
| H | -3.096  | 4.6369  | -0.9301 | H | -2.9808 | 4.6879  | -0.9082 |
| H | -2.9769 | 6.1996  | -0.1514 | H | -2.8574 | 6.2328  | -0.0953 |



|   |         |         |         |   |         |         |         |
|---|---------|---------|---------|---|---------|---------|---------|
| H | -1.8543 | 5.2874  | 1.7758  | H | -1.7933 | 5.2656  | 1.8382  |
| H | -3.2741 | 4.3062  | 1.4462  | H | -3.2189 | 4.312   | 1.4562  |
| H | -0.5848 | 6.3022  | -0.4421 | H | -0.4578 | 6.3054  | -0.3285 |
| H | -1.3129 | 5.9287  | -1.9914 | H | -1.155  | 5.9744  | -1.9016 |
| H | 1.1465  | 2.0603  | 1.2811  | H | 1.1706  | 2.0031  | 1.3451  |
| H | 0.5055  | 1.6035  | -0.2882 | H | 0.5584  | 1.5882  | -0.2471 |
| H | 2.7791  | 3.5702  | 0.3331  | H | 2.849   | 3.5029  | 0.4663  |
| H | 3.1397  | 3.9002  | -2.0419 | H | 3.2677  | 3.8806  | -1.8911 |
| H | 1.8594  | 2.7856  | -2.4712 | H | 1.9815  | 2.7957  | -2.375  |
| H | 1.0552  | 5.0815  | -2.6878 | H | 1.2163  | 5.1066  | -2.5604 |
| H | 1.5931  | 5.4865  | -1.0723 | H | 1.7224  | 5.4697  | -0.9248 |
| H | -0.8467 | 3.7232  | -3.139  | H | -0.2354 | 2.3606  | -2.1586 |
| H | -0.3456 | 2.3239  | -2.1957 | H | -1.7986 | 3.1204  | -1.9026 |
| H | -1.9135 | 3.0669  | -1.9201 | H | -0.6953 | 3.7862  | -3.0833 |
| H | 0.6629  | 4.3394  | 2.0591  | H | 0.7026  | 4.275   | 2.1593  |
| H | 5.0309  | 2.3071  | 0.65    | H | 5.0621  | 2.1808  | 0.8233  |
| H | 2.494   | -0.8328 | -3.6266 | H | 2.6036  | -0.7623 | -3.6295 |
| H | 3.8198  | -1.7353 | -4.3267 | H | 3.9342  | -1.6643 | -4.321  |
| H | 5.2868  | -1.2461 | -2.4819 | H | 5.3517  | -1.2686 | -2.4162 |
| H | 4.5476  | 0.2593  | -3.0091 | H | 4.6554  | 0.2681  | -2.9101 |
| H | 3.6839  | -3.4715 | -2.6552 | H | 3.7143  | -3.4569 | -2.72   |
| H | 2.0859  | -3.2264 | -3.3311 | H | 2.1424  | -3.1559 | -3.4333 |
| H | 3.6745  | -1.1622 | 1.6599  | H | 3.6195  | -1.3084 | 1.6757  |
| H | 2.0433  | -0.8888 | 1.0769  | H | 2.0111  | -0.9822 | 1.0574  |
| H | 3.4103  | -3.5365 | 1.7608  | H | 3.3097  | -3.681  | 1.6733  |
| H | 1.4115  | -4.7774 | 1.2655  | H | 1.2978  | -4.8592 | 1.0802  |
| H | 0.5185  | -3.333  | 0.8535  | H | 0.4472  | -3.3812 | 0.6976  |
| H | 2.8698  | -4.5418 | -0.6474 | H | 2.8192  | -4.5832 | -0.778  |
| H | 1.2096  | -4.4289 | -1.1892 | H | 1.1787  | -4.4177 | -1.3643 |
| H | 0.4358  | -1.9323 | 4.4539  | H | 0.3012  | -2.1269 | 4.3569  |
| H | 2.2501  | -3.155  | 5.2037  | H | 2.0666  | -3.4238 | 5.0976  |
| H | 3.5261  | -3.8544 | 4.0705  | H | 3.3542  | -4.1061 | 3.9672  |
| H | 1.0191  | -0.8463 | -1.9972 | H | 1.079   | -0.8074 | -2.0483 |
| H | 0.1875  | -2.3814 | -1.8888 | H | 0.2155  | -2.3281 | -2.0134 |
| H | 0.5295  | -1.4616 | -0.4281 | H | 0.535   | -1.4638 | -0.5141 |
| H | -3.6945 | -5.1579 | -1.1653 | H | -4.2433 | -4.7223 | -1.5206 |
| H | -4.9012 | -4.7634 | 0.0606  | H | -4.8077 | -4.8553 | 0.1462  |
| H | -6.473  | -2.7173 | -0.557  | H | -6.6525 | -1.8957 | -2.2858 |
| H | -6.6013 | -2.2418 | -2.2403 | H | -5.2934 | -2.7986 | -2.9285 |
| H | -1.8246 | -1.1825 | 0.5899  | H | -1.7905 | -1.1814 | 0.4685  |
| H | -2.2284 | -0.3488 | -0.8706 | H | -2.1438 | -0.2764 | -0.958  |
| H | -3.8131 | -0.2603 | 1.7501  | H | -3.7645 | -0.3015 | 1.648   |
| H | -5.188  | 1.4885  | 0.7083  | H | -5.2034 | 1.4225  | 0.7329  |
| H | -4.2794 | 1.3938  | -0.7902 | H | -4.2814 | 1.5241  | -0.7524 |
| H | -6.0255 | -0.7513 | 0.4667  | H | -6.0009 | -0.7869 | 0.2214  |
| H | -6.3501 | 0.1316  | -1.0165 | H | -6.2792 | 0.2344  | -1.1795 |
| H | -2.1523 | 0.9429  | 3.4155  | H | -2.1706 | 0.8825  | 3.3779  |

|             |                  |                  |                  |             |                  |                  |                  |
|-------------|------------------|------------------|------------------|-------------|------------------|------------------|------------------|
| H           | -5.2406          | -0.5668          | -3.2036          | H           | -4.9747          | -0.203           | -3.3774          |
| H           | -3.719           | -0.014           | -2.5175          | H           | -3.5441          | 0.3231           | -2.5047          |
| H           | -3.8349          | -1.6403          | -3.1792          | H           | -3.5362          | -1.2342          | -3.329           |
| H           | -1.7279          | -3.0398          | 1.2209           | H           | -1.7763          | -3.0438          | 1.0774           |
| H           | 5.2694           | -2.1776          | 0.0638           | H           | 5.241            | -2.2918          | 0.0895           |
| H           | -4.6858          | -3.7564          | -2.8043          | H           | -6.6167          | -4.2116          | -1.4408          |
| H           | -6.0118          | -4.6225          | -2.0426          | H           | -6.41            | -3.0836          | -0.1057          |
| <b>4b-3</b> | <b>X axis(Å)</b> | <b>Y axis(Å)</b> | <b>Z axis(Å)</b> | <b>4b-4</b> | <b>X axis(Å)</b> | <b>Y axis(Å)</b> | <b>Z axis(Å)</b> |
| C           | -0.6888          | 5.6528           | -0.745           | C           | -2.1594          | 5.0457           | 0.2875           |
| C           | -1.009           | 4.9244           | 0.5608           | C           | -1.8775          | 4.2155           | 1.5405           |
| C           | -0.45            | 3.4922           | 0.5904           | C           | -0.9838          | 2.998            | 1.2603           |
| C           | 1.0746           | 3.4756           | 0.2739           | C           | 0.3227           | 3.4082           | 0.5177           |
| C           | 1.3726           | 4.1492           | -1.1171          | C           | -0.0059          | 4.1673           | -0.8214          |
| C           | 0.7975           | 5.5927           | -1.1117          | C           | -0.8894          | 5.4018           | -0.493           |
| C           | 1.7245           | 2.0762           | 0.3462           | C           | 1.2795           | 2.2289           | 0.2476           |
| C           | 3.2488           | 2.1396           | 0.0933           | C           | 2.5765           | 2.6703           | -0.4681          |
| C           | 3.5906           | 2.8566           | -1.2205          | C           | 2.3005           | 3.5033           | -1.7276          |
| C           | 2.9115           | 4.2253           | -1.325           | C           | 1.3231           | 4.6524           | -1.4638          |
| C           | 0.7754           | 3.3894           | -2.3313          | C           | -0.7462          | 3.3063           | -1.8805          |
| C           | -0.7459          | 2.8576           | 1.9291           | C           | -0.683           | 2.2759           | 2.5531           |
| O           | -0.2226          | 3.1516           | 2.9956           | O           | -0.0124          | 2.7136           | 3.4784           |
| O           | 1.7482           | 4.2845           | 1.2766           | O           | 1.0535           | 4.3401           | 1.3569           |
| C           | 3.862            | 0.7643           | 0.1305           | C           | 3.4332           | 1.4754           | -0.8026          |
| O           | 3.3472           | -0.1735          | -0.7576          | O           | 2.7854           | 0.3943           | -1.3904          |
| C           | 4.8322           | 0.3693           | 0.9517           | C           | 4.7353           | 1.3527           | -0.5567          |
| C           | 3.9864           | -2.267           | -2.9309          | C           | 2.7169           | -1.6711          | -3.6502          |
| C           | 4.8637           | -1.7879          | -1.7734          | C           | 3.9295           | -0.95            | -3.0585          |
| C           | 4.0513           | -1.4131          | -0.5248          | C           | 3.7633           | -0.6523          | -1.5618          |
| C           | 3.0938           | -2.5655          | -0.0999          | C           | 3.4023           | -1.9407          | -0.7626          |
| C           | 2.1304           | -2.9581          | -1.2808          | C           | 2.0968           | -2.6128          | -1.3296          |
| C           | 2.9847           | -3.3511          | -2.517           | C           | 2.3007           | -2.9055          | -2.8421          |
| C           | 2.2876           | -2.2693          | 1.1874           | C           | 3.2784           | -1.7223          | 0.7631           |
| C           | 1.3789           | -3.4537          | 1.587            | C           | 2.971            | -3.0384          | 1.5137           |
| C           | 0.4756           | -3.9191          | 0.434            | C           | 1.7571           | -3.7834          | 0.9343           |
| C           | 1.2713           | -4.18            | -0.8499          | C           | 1.8554           | -3.9566          | -0.5854          |
| C           | 0.6011           | -3.1849          | 2.8605           | C           | 2.8649           | -2.8347          | 3.0124           |
| C           | -0.3894          | -2.0759          | 2.9311           | C           | 1.8035           | -1.9617          | 3.5842           |
| C           | 0.7605           | -3.9141          | 3.978            | C           | 3.7048           | -3.4101          | 3.8893           |
| O           | -0.6336          | -1.3225          | 1.997            | O           | 0.9719           | -1.3764          | 2.9016           |
| C           | 1.1553           | -1.8287          | -1.7023          | C           | 0.8139           | -1.7543          | -1.1663          |
| C           | 4.9865           | -1.0325          | 0.601            | C           | 5.0132           | 7.00E-04         | -1.0149          |
| O           | 5.7467           | -1.7889          | 1.19             | O           | 6.1113           | -0.5283          | -0.908           |
| C           | -7.1333          | -1.6403          | -0.9253          | C           | -6.2588          | -2.1276          | -1.9979          |
| C           | -6.2288          | -0.7203          | -0.137           | C           | -5.5052          | -0.99            | -1.3466          |
| C           | -4.8749          | -0.7498          | -0.2126          | C           | -4.7581          | -1.1285          | -0.223           |
| C           | -4.1481          | -1.7279          | -1.161           | C           | -4.5851          | -2.5027          | 0.4584           |
| C           | -5.1136          | -2.3821          | -2.1878          | C           | -5.0714          | -3.6728          | -0.4409          |

|   |         |         |         |   |         |         |         |
|---|---------|---------|---------|---|---------|---------|---------|
| C | -3.9289 | 0.1296  | 0.5985  | C | -4.0245 | 0.0035  | 0.4874  |
| C | -2.9108 | 0.8811  | -0.2835 | C | -2.5323 | -0.308  | 0.711   |
| C | -2.128  | -0.1136 | -1.1479 | C | -2.3793 | -1.625  | 1.4849  |
| C | -3.0674 | -0.9781 | -1.9845 | C | -3.0862 | -2.7693 | 0.7609  |
| C | -1.9556 | 1.7712  | 0.4807  | C | -1.8339 | 0.8731  | 1.346   |
| C | -1.7446 | 1.8109  | 1.7952  | C | -1.2664 | 0.9445  | 2.5487  |
| O | -1.2237 | 2.6629  | -0.3041 | O | -1.7363 | 2.0016  | 0.5331  |
| C | -3.4875 | -2.8498 | -0.3252 | C | -5.3988 | -2.5232 | 1.7742  |
| C | -6.9883 | 0.215   | 0.7521  | C | -5.6847 | 0.3101  | -2.0685 |
| O | -8.2139 | 0.2654  | 0.7671  | O | -6.3296 | 0.4052  | -3.1079 |
| O | 3.8977  | -3.741  | 0.1862  | O | 4.477   | -2.9005 | -0.949  |
| C | -6.4168 | -2.831  | -1.5487 | C | -6.3949 | -3.3651 | -1.1205 |
| H | -1.2937 | 5.2325  | -1.5561 | H | -2.8594 | 4.5047  | -0.3587 |
| H | -0.9937 | 6.7023  | -0.6548 | H | -2.6728 | 5.9703  | 0.5777  |
| H | -0.6056 | 5.5051  | 1.4003  | H | -1.4081 | 4.8616  | 2.2934  |
| H | -2.099  | 4.9115  | 0.6893  | H | -2.8375 | 3.8928  | 1.9637  |
| H | 1.354   | 6.2145  | -0.3983 | H | -0.3141 | 6.1288  | 0.0949  |
| H | 0.9417  | 6.06    | -2.0942 | H | -1.173  | 5.9199  | -1.418  |
| H | 1.5771  | 1.6478  | 1.3463  | H | 1.5752  | 1.7631  | 1.1971  |
| H | 1.2393  | 1.3899  | -0.3573 | H | 0.7626  | 1.4533  | -0.3284 |
| H | 3.6971  | 2.7256  | 0.9082  | H | 3.1394  | 3.3073  | 0.2289  |
| H | 4.677   | 2.9957  | -1.2931 | H | 3.2423  | 3.9226  | -2.1049 |
| H | 3.3092  | 2.2381  | -2.0814 | H | 1.9146  | 2.866   | -2.5327 |
| H | 3.1415  | 4.6639  | -2.3044 | H | 1.1207  | 5.1724  | -2.409  |
| H | 3.3624  | 4.8982  | -0.5842 | H | 1.8128  | 5.391   | -0.8163 |
| H | 1.0548  | 2.3326  | -2.3474 | H | -0.2407 | 2.3584  | -2.0831 |
| H | -0.3146 | 3.4331  | -2.373  | H | -1.7738 | 3.0664  | -1.6008 |
| H | 1.1318  | 3.8295  | -3.2707 | H | -0.8113 | 3.8455  | -2.8336 |
| H | 1.4686  | 3.9722  | 2.1632  | H | 1.1338  | 3.9528  | 2.2541  |
| H | 5.3656  | 0.8994  | 1.7169  | H | 5.4331  | 2.0312  | -0.1054 |
| H | 3.4574  | -1.4116 | -3.3653 | H | 1.8772  | -0.9713 | -3.7259 |
| H | 4.6283  | -2.6585 | -3.7293 | H | 2.9474  | -1.9765 | -4.6778 |
| H | 5.5871  | -2.5764 | -1.5291 | H | 4.8244  | -1.5629 | -3.2255 |
| H | 5.4495  | -0.9262 | -2.1183 | H | 4.0832  | -0.0177 | -3.6168 |
| H | 3.5407  | -4.2747 | -2.3098 | H | 3.0693  | -3.6784 | -2.9732 |
| H | 2.3321  | -3.5775 | -3.3698 | H | 1.3806  | -3.3202 | -3.2732 |
| H | 2.9774  | -2.093  | 2.0231  | H | 4.2267  | -1.3373 | 1.1603  |
| H | 1.7071  | -1.3496 | 1.0679  | H | 2.5232  | -0.9596 | 0.975   |
| H | 2.0505  | -4.2992 | 1.7988  | H | 3.8342  | -3.6991 | 1.3436  |
| H | -0.0432 | -4.8427 | 0.7211  | H | 1.6798  | -4.7756 | 1.3973  |
| H | -0.3096 | -3.1839 | 0.2305  | H | 0.8235  | -3.2664 | 1.1796  |
| H | 1.9105  | -5.0589 | -0.6959 | H | 2.6644  | -4.6646 | -0.8066 |
| H | 0.5738  | -4.4557 | -1.6513 | H | 0.9359  | -4.4327 | -0.9497 |
| H | -0.9087 | -1.9605 | 3.8979  | H | 1.8029  | -1.8648 | 4.6833  |
| H | 0.2067  | -3.7231 | 4.8925  | H | 3.6302  | -3.2618 | 4.9625  |
| H | 1.4656  | -4.7409 | 4.0094  | H | 4.5077  | -4.0594 | 3.5496  |
| H | 1.6444  | -1.0063 | -2.228  | H | 0.8021  | -0.87   | -1.8064 |

|             |                  |                  |                  |             |                  |                  |                  |
|-------------|------------------|------------------|------------------|-------------|------------------|------------------|------------------|
| H           | 0.3905           | -2.2135          | -2.3877          | H           | -0.0745          | -2.3366          | -1.4401          |
| H           | 0.6357           | -1.3935          | -0.8472          | H           | 0.6656           | -1.4091          | -0.14            |
| H           | -7.9336          | -2.0322          | -0.2856          | H           | -7.2694          | -1.8069          | -2.2792          |
| H           | -7.6144          | -1.0534          | -1.7183          | H           | -5.7381          | -2.399           | -2.9254          |
| H           | -5.355           | -1.6699          | -2.9889          | H           | -4.3286          | -3.8849          | -1.2223          |
| H           | -4.6303          | -3.2373          | -2.6767          | H           | -5.1656          | -4.5944          | 0.1471           |
| H           | -4.461           | 0.8711           | 1.1971           | H           | -4.1004          | 0.9487           | -0.0525          |
| H           | -3.407           | -0.5096          | 1.3218           | H           | -4.5155          | 0.1873           | 1.4521           |
| H           | -3.4851          | 1.5388           | -0.9527          | H           | -2.0642          | -0.4534          | -0.2739          |
| H           | -1.4454          | 0.4183           | -1.8227          | H           | -1.3181          | -1.8799          | 1.5839           |
| H           | -1.504           | -0.7508          | -0.5138          | H           | -2.7751          | -1.5289          | 2.5028           |
| H           | -3.554           | -0.3233          | -2.7207          | H           | -2.5472          | -2.951           | -0.1794          |
| H           | -2.4703          | -1.6962          | -2.5615          | H           | -2.98            | -3.6861          | 1.3551           |
| H           | -2.1553          | 1.23             | 2.5978           | H           | -1.1713          | 0.2166           | 3.3315           |
| H           | -2.9874          | -3.5795          | -0.9727          | H           | -5.3337          | -3.5037          | 2.2601           |
| H           | -2.7322          | -2.4673          | 0.3671           | H           | -5.0444          | -1.784           | 2.4991           |
| H           | -4.2231          | -3.3919          | 0.2788           | H           | -6.4589          | -2.3108          | 1.5978           |
| H           | -6.4039          | 0.8724           | 1.4066           | H           | -5.2091          | 1.1976           | -1.6344          |
| H           | 4.613            | -3.4859          | 0.8063           | H           | 5.3286           | -2.4583          | -0.7485          |
| H           | -6.2288          | -3.5973          | -0.7882          | H           | -7.1841          | -3.2131          | -0.3753          |
| H           | -7.0637          | -3.2936          | -2.3032          | H           | -6.7072          | -4.2173          | -1.7352          |
| <b>4b-5</b> | <b>X axis(Å)</b> | <b>Y axis(Å)</b> | <b>Z axis(Å)</b> | <b>4b-6</b> | <b>X axis(Å)</b> | <b>Y axis(Å)</b> | <b>Z axis(Å)</b> |
| C           | -3.0069          | 4.8558           | -0.4161          | C           | -1.1368          | 5.528            | -0.674           |
| C           | -2.4899          | 4.3844           | 0.945            | C           | -1.3536          | 4.7767           | 0.6401           |
| C           | -1.534           | 3.189            | 0.8313           | C           | -0.6868          | 3.3908           | 0.6451           |
| C           | -0.3746          | 3.484            | -0.1673          | C           | 0.8223           | 3.4906           | 0.2748           |
| C           | -0.9382          | 3.8561           | -1.5891          | C           | 1.0182           | 4.1857           | -1.1239          |
| C           | -1.8891          | 5.0762           | -1.4429          | C           | 0.3357           | 5.5812           | -1.0935          |
| C           | 0.6626           | 2.3464           | -0.2773          | C           | 1.5795           | 2.1452           | 0.3197           |
| C           | 1.8143           | 2.696            | -1.2461          | C           | 3.0847           | 2.3255           | 0.0127           |
| C           | 1.2985           | 3.1326           | -2.6235          | C           | 3.323            | 3.0662           | -1.3107          |
| C           | 0.247            | 4.2427           | -2.5177          | C           | 2.5384           | 4.379            | -1.3865          |
| C           | -1.7177          | 2.711            | -2.2905          | C           | 0.4375           | 3.3831           | -2.3184          |
| C           | -0.9975          | 2.8094           | 2.193            | C           | -0.8876          | 2.7352           | 1.9914           |
| O           | -0.2893          | 3.5103           | 2.9032           | O           | -0.3464          | 3.0631           | 3.0389           |
| O           | 0.3523           | 4.6467           | 0.3105           | O           | 1.4674           | 4.3482           | 1.2556           |
| C           | 2.7883           | 1.5518           | -1.3712          | C           | 3.8036           | 1.0019           | 0.0245           |
| O           | 2.2497           | 0.2716           | -1.4547          | O           | 3.3255           | 0.0235           | -0.8399          |
| C           | 4.1147           | 1.6622           | -1.3611          | C           | 4.8352           | 0.6863           | 0.8042           |
| C           | 2.2088           | -2.4299          | -2.9117          | C           | 4.0174           | -2.0414          | -3.0244          |
| C           | 3.3478           | -1.4136          | -2.8211          | C           | 4.9083           | -1.4883          | -1.911           |
| C           | 3.356            | -0.6575          | -1.4853          | C           | 4.127            | -1.1598          | -0.6301          |
| C           | 3.3499           | -1.6378          | -0.2718          | C           | 3.2745           | -2.3733          | -0.1543          |
| C           | 2.126            | -2.6224          | -0.3418          | C           | 2.2905           | -2.846           | -1.2878          |
| C           | 2.1547           | -3.37            | -1.7031          | C           | 3.1156           | -3.19            | -2.558           |
| C           | 3.392            | -0.9339          | 1.1039           | C           | 2.5069           | -2.1213          | 1.1654           |
| C           | 3.4218           | -1.9406          | 2.2774           | C           | 1.7025           | -3.3619          | 1.6144           |

|   |         |         |         |   |         |         |         |
|---|---------|---------|---------|---|---------|---------|---------|
| C | 2.3235  | -3.0142 | 2.1879  | C | 0.7858  | -3.9038 | 0.5062  |
| C | 2.2509  | -3.6652 | 0.8037  | C | 1.5413  | -4.1214 | -0.8096 |
| C | 3.4306  | -1.2405 | 3.6228  | C | 0.9627  | -3.1321 | 2.9178  |
| C | 2.2665  | -0.4143 | 4.0491  | C | -0.0972 | -2.0918 | 3.0211  |
| C | 4.4604  | -1.3187 | 4.4821  | C | 1.2188  | -3.8355 | 4.0339  |
| O | 1.261   | -0.2627 | 3.3656  | O | -0.4337 | -1.3702 | 2.0904  |
| C | 0.748   | -1.9274 | -0.1925 | C | 1.2191  | -1.7938 | -1.6735 |
| C | 4.545   | 0.2755  | -1.4239 | C | 5.0806  | -0.7017 | 0.4505  |
| O | 5.7206  | -0.06   | -1.3749 | O | 5.9217  | -1.3943 | 1.007   |
| C | -3.8472 | -4.2314 | -1.5457 | C | -7.0078 | -1.7855 | -1.1503 |
| C | -3.201  | -2.8811 | -1.3432 | C | -6.1953 | -0.993  | -0.1544 |
| C | -3.6268 | -1.9664 | -0.437  | C | -4.8466 | -1.0878 | -0.0605 |
| C | -4.8606 | -2.2361 | 0.4485  | C | -4.0448 | -2.1109 | -0.8947 |
| C | -5.2565 | -3.7384 | 0.458   | C | -4.9426 | -3.022  | -1.7784 |
| C | -2.9834 | -0.6035 | -0.2105 | C | -3.9574 | -0.1704 | 0.7687  |
| C | -2.7163 | -0.2905 | 1.2788  | C | -2.9951 | 0.6206  | -0.1465 |
| C | -4.0034 | -0.4381 | 2.0956  | C | -2.1819 | -0.3298 | -1.0396 |
| C | -4.5885 | -1.8378 | 1.9228  | C | -3.0717 | -1.3164 | -1.8034 |
| C | -2.1093 | 1.0772  | 1.4846  | C | -2.072  | 1.5696  | 0.5845  |
| C | -1.3875 | 1.452   | 2.5391  | C | -1.819  | 1.6243  | 1.891   |
| O | -2.2851 | 2.0094  | 0.4684  | O | -1.4268 | 2.5059  | -0.2241 |
| C | -6.0515 | -1.4128 | -0.099  | C | -3.2472 | -3.0707 | 0.022   |
| C | -2.0616 | -2.6349 | -2.2816 | C | -7.0181 | -0.0634 | 0.6806  |
| O | -1.5646 | -3.5225 | -2.9668 | O | -8.2316 | 0.0525  | 0.5461  |
| O | 4.546   | -2.4583 | -0.3466 | O | 4.1725  | -3.4853 | 0.1045  |
| C | -5.236  | -4.3529 | -0.9321 | C | -6.1684 | -2.3023 | -2.3121 |
| H | -3.7317 | 4.13    | -0.8013 | H | -1.7366 | 5.0632  | -1.4643 |
| H | -3.5618 | 5.7924  | -0.2842 | H | -1.5171 | 6.5512  | -0.5696 |
| H | -1.9885 | 5.2236  | 1.4438  | H | -0.9654 | 5.3859  | 1.4665  |
| H | -3.3528 | 4.1224  | 1.5706  | H | -2.4341 | 4.6812  | 0.8075  |
| H | -1.3162 | 5.9638  | -1.1443 | H | 0.8684  | 6.2434  | -0.3985 |
| H | -2.3397 | 5.3217  | -2.4131 | H | 0.4087  | 6.0586  | -2.0791 |
| H | 1.1131  | 2.1549  | 0.7055  | H | 1.5012  | 1.7064  | 1.3231  |
| H | 0.1697  | 1.416   | -0.5804 | H | 1.1234  | 1.4241  | -0.3682 |
| H | 2.3596  | 3.549   | -0.8171 | H | 3.5153  | 2.9447  | 0.8125  |
| H | 2.135   | 3.4988  | -3.2327 | H | 4.3923  | 3.2877  | -1.4222 |
| H | 0.8842  | 2.2747  | -3.167  | H | 3.0585  | 2.4278  | -2.1624 |
| H | -0.1206 | 4.4831  | -3.5235 | H | 2.6989  | 4.8343  | -2.3722 |
| H | 0.7342  | 5.1559  | -2.1524 | H | 2.963   | 5.0841  | -0.6602 |
| H | -1.1579 | 1.7723  | -2.3154 | H | 0.7954  | 2.3506  | -2.3475 |
| H | -2.682  | 2.4971  | -1.8257 | H | -0.6535 | 3.3441  | -2.3213 |
| H | -1.9397 | 2.9803  | -3.3304 | H | 0.7258  | 3.8492  | -3.2686 |
| H | 0.5805  | 4.5046  | 1.2533  | H | 1.2451  | 4.0137  | 2.1504  |
| H | 4.7481  | 2.5247  | -1.2847 | H | 5.358   | 1.2594  | 1.5454  |
| H | 1.255   | -1.9023 | -3.0221 | H | 3.4095  | -1.2307 | -3.441  |
| H | 2.3308  | -3.0257 | -3.8242 | H | 4.6499  | -2.3944 | -3.8479 |
| H | 4.3022  | -1.9356 | -2.966  | H | 5.6967  | -2.2203 | -1.6937 |

|             |                  |                  |                  |             |                  |                  |                  |
|-------------|------------------|------------------|------------------|-------------|------------------|------------------|------------------|
| H           | 3.249            | -0.7086          | -3.6564          | H           | 5.4144           | -0.5904          | -2.2881          |
| H           | 3.0261           | -4.0364          | -1.7452          | H           | 3.7452           | -4.0692          | -2.3691          |
| H           | 1.2746           | -4.0191          | -1.7954          | H           | 2.4439           | -3.4715          | -3.3791          |
| H           | 4.3021           | -0.3242          | 1.1788           | H           | 3.2186           | -1.888           | 1.9682           |
| H           | 2.5511           | -0.2404          | 1.1991           | H           | 1.8584           | -1.2459          | 1.0649           |
| H           | 4.3748           | -2.4838          | 2.1903           | H           | 2.4408           | -4.1553          | 1.8046           |
| H           | 2.5147           | -3.7956          | 2.9349           | H           | 0.348            | -4.8589          | 0.8236           |
| H           | 1.3418           | -2.5997          | 2.4395           | H           | -0.0586          | -3.2292          | 0.3318           |
| H           | 3.1439           | -4.2868          | 0.6591           | H           | 2.2482           | -4.9506          | -0.6771          |
| H           | 1.4              | -4.3583          | 0.7806           | H           | 0.8311           | -4.4552          | -1.577           |
| H           | 2.3571           | 0.067            | 5.0378           | H           | -0.5798          | -1.9983          | 4.0089           |
| H           | 4.4651           | -0.8153          | 5.4443           | H           | 0.6926           | -3.6718          | 4.9696           |
| H           | 5.3454           | -1.9017          | 4.2407           | H           | 1.9796           | -4.612           | 4.0421           |
| H           | 0.4893           | -1.3018          | -1.0482          | H           | 1.6241           | -0.9439          | -2.2263          |
| H           | -0.0481          | -2.676           | -0.1041          | H           | 0.4548           | -2.2395          | -2.3215          |
| H           | 0.6848           | -1.2932          | 0.6951           | H           | 0.7073           | -1.3881          | -0.7993          |
| H           | -3.9339          | -4.4596          | -2.6151          | H           | -7.4851          | -2.6248          | -0.6293          |
| H           | -3.1912          | -4.9947          | -1.1076          | H           | -7.8099          | -1.1703          | -1.5752          |
| H           | -4.5629          | -4.3074          | 1.0923           | H           | -4.3643          | -3.434           | -2.615           |
| H           | -6.2519          | -3.8683          | 0.9012           | H           | -5.2896          | -3.8879          | -1.1973          |
| H           | -2.0306          | -0.5041          | -0.7356          | H           | -4.5292          | 0.5489           | 1.3583           |
| H           | -3.6484          | 0.1544           | -0.6446          | H           | -3.4044          | -0.7676          | 1.5026           |
| H           | -1.9916          | -1.0325          | 1.6456           | H           | -3.6211          | 1.2419           | -0.8048          |
| H           | -3.7972          | -0.2742          | 3.161            | H           | -1.5916          | 0.2437           | -1.7658          |
| H           | -4.7374          | 0.3226           | 1.8037           | H           | -1.4618          | -0.8836          | -0.4292          |
| H           | -3.8852          | -2.5521          | 2.3732           | H           | -3.6403          | -0.7522          | -2.5544          |
| H           | -5.5141          | -1.9111          | 2.5084           | H           | -2.4275          | -2.0078          | -2.3618          |
| H           | -1.0979          | 0.911            | 3.4196           | H           | -2.1633          | 1.019            | 2.7066           |
| H           | -6.9621          | -1.608           | 0.4792           | H           | -2.7086          | -3.8185          | -0.5723          |
| H           | -5.8688          | -0.3343          | -0.057           | H           | -2.5034          | -2.5615          | 0.6388           |
| H           | -6.2661          | -1.6548          | -1.1456          | H           | -3.9163          | -3.6074          | 0.7052           |
| H           | -1.6831          | -1.6066          | -2.3476          | H           | -6.4931          | 0.5135           | 1.4518           |
| H           | 5.3218           | -1.8726          | -0.4725          | H           | 4.8951           | -3.1731          | 0.6888           |
| H           | -5.9755          | -3.8661          | -1.5781          | H           | -6.768           | -2.9875          | -2.9222          |
| H           | -5.5207          | -5.4101          | -0.8775          | H           | -5.8715          | -1.4728          | -2.9648          |
| <b>4b-7</b> | <b>X axis(Å)</b> | <b>Y axis(Å)</b> | <b>Z axis(Å)</b> | <b>4b-8</b> | <b>X axis(Å)</b> | <b>Y axis(Å)</b> | <b>Z axis(Å)</b> |
| C           | -2.2292          | 5.0656           | 0.2156           | C           | 3.9712           | -4.1251          | -0.2524          |
| C           | -1.9423          | 4.2634           | 1.4855           | C           | 3.5418           | -3.6391          | 1.1323           |
| C           | -1.0464          | 3.0422           | 1.2297           | C           | 2.3066           | -2.7253          | 1.0813           |
| C           | 0.2572           | 3.4386           | 0.4747           | C           | 1.1339           | -3.4002          | 0.3119           |
| C           | -0.0769          | 4.1677           | -0.8797          | C           | 1.5728           | -3.8098          | -1.1435          |
| C           | -0.962           | 5.4072           | -0.5758          | C           | 2.8167           | -4.7363          | -1.053           |
| C           | 1.2154           | 2.2554           | 0.2273           | C           | -0.161           | -2.5592          | 0.2674           |
| C           | 2.5093           | 2.6832           | -0.5021          | C           | -1.3064          | -3.3072          | -0.4518          |
| C           | 2.228            | 3.4887           | -1.7783          | C           | -0.8965          | -3.8011          | -1.8469          |
| C           | 1.2493           | 4.6414           | -1.5363          | C           | 0.4132           | -4.5937          | -1.8196          |
| C           | -0.8184          | 3.2823           | -1.9178          | C           | 1.9232           | -2.6102          | -2.0643          |

|   |         |         |         |   |         |         |         |
|---|---------|---------|---------|---|---------|---------|---------|
| C | -0.7411 | 2.3489  | 2.5371  | C | 1.9021  | -2.3366 | 2.4861  |
| O | -0.0707 | 2.8087  | 3.4518  | O | 1.3975  | -3.0774 | 3.3191  |
| O | 0.9885  | 4.3899  | 1.2913  | O | 0.7932  | -4.6318 | 1.0034  |
| C | 3.3662  | 1.4824  | -0.8143 | C | -2.545  | -2.4538 | -0.531  |
| O | 2.718   | 0.3889  | -1.3783 | O | -2.4157 | -1.22   | -1.1601 |
| C | 4.6692  | 1.3661  | -0.5698 | C | -3.7394 | -2.7739 | -0.0386 |
| C | 2.6467  | -1.7181 | -3.5996 | C | -3.5336 | 0.5922  | -3.3893 |
| C | 3.8596  | -0.9842 | -3.0245 | C | -4.259  | -0.4734 | -2.5669 |
| C | 3.697   | -0.6593 | -1.5332 | C | -3.716  | -0.5909 | -1.1343 |
| C | 3.3403  | -1.9333 | -0.7093 | C | -3.6943 | 0.7909  | -0.4168 |
| C | 2.0345  | -2.6181 | -1.2605 | C | -2.8584 | 1.841   | -1.2384 |
| C | 2.235   | -2.9382 | -2.7678 | C | -3.4468 | 1.9436  | -2.6722 |
| C | 3.2199  | -1.6869 | 0.8123  | C | -3.2005 | 0.7298  | 1.0481  |
| C | 2.9168  | -2.9894 | 1.5879  | C | -3.2404 | 2.1164  | 1.7302  |
| C | 1.7031  | -3.7475 | 1.0255  | C | -2.5162 | 3.1998  | 0.9153  |
| C | 1.7977  | -3.9485 | -0.491  | C | -2.9716 | 3.229   | -0.5474 |
| C | 2.8137  | -2.7581 | 3.0829  | C | -2.7697 | 2.0657  | 3.1708  |
| C | 1.7517  | -1.8771 | 3.6411  | C | -1.3698 | 1.6834  | 3.5045  |
| C | 3.657   | -3.3153 | 3.9683  | C | -3.572  | 2.357   | 4.2088  |
| O | 0.9173  | -1.306  | 2.95    | O | -0.5297 | 1.3793  | 2.6661  |
| C | 0.7505  | -1.7591 | -1.1094 | C | -1.3504 | 1.4982  | -1.3542 |
| C | 4.9474  | 0.0056  | -1.0019 | C | -4.5338 | -1.6006 | -0.3601 |
| O | 6.0464  | -0.52   | -0.8872 | O | -5.6957 | -1.4626 | -0.0026 |
| C | -5.7136 | -2.3865 | -2.1777 | C | 3.1353  | 5.1263  | -0.9931 |
| C | -5.251  | -1.139  | -1.4636 | C | 2.3988  | 4.0006  | -0.3066 |
| C | -4.7331 | -1.1551 | -0.2109 | C | 2.68    | 2.6913  | -0.5003 |
| C | -4.6744 | -2.4501 | 0.627   | C | 3.8083  | 2.2349  | -1.4405 |
| C | -5.3209 | -3.6717 | -0.0841 | C | 4.8288  | 3.3811  | -1.6561 |
| C | -4.0642 | 0.0282  | 0.4747  | C | 2.0335  | 1.5267  | 0.2172  |
| C | -2.577  | -0.2826 | 0.7503  | C | 3.0315  | 0.8947  | 1.2075  |
| C | -2.4277 | -1.5853 | 1.5577  | C | 4.4877  | 0.9495  | 0.6872  |
| C | -3.1804 | -2.7545 | 0.9112  | C | 4.5563  | 1.0024  | -0.8432 |
| C | -1.8874 | 0.9158  | 1.3615  | C | 2.6099  | -0.5129 | 1.5445  |
| C | -1.3185 | 1.0151  | 2.5616  | C | 2.1679  | -0.9288 | 2.7291  |
| O | -1.7981 | 2.0284  | 0.5261  | O | 2.6808  | -1.4494 | 0.5182  |
| C | -5.4435 | -2.2839 | 1.9609  | C | 3.2042  | 1.8199  | -2.8018 |
| C | -5.3727 | 0.1008  | -2.2934 | C | 1.3629  | 4.4719  | 0.6639  |
| O | -5.8062 | 0.0905  | -3.4408 | O | 1.0959  | 5.6591  | 0.8193  |
| O | 4.4163  | -2.8946 | -0.8807 | O | -5.0558 | 1.2946  | -0.3676 |
| C | -5.1127 | -3.6564 | -1.5881 | C | 4.1481  | 4.6874  | -2.047  |
| H | -2.9298 | 4.5092  | -0.4169 | H | 4.4176  | -3.2939 | -0.8095 |
| H | -2.7438 | 5.9952  | 0.487   | H | 4.7652  | -4.873  | -0.1402 |
| H | -1.4724 | 4.9268  | 2.223   | H | 3.3408  | -4.5105 | 1.7685  |
| H | -2.9004 | 3.9478  | 1.9181  | H | 4.3885  | -3.1108 | 1.5892  |
| H | -0.3866 | 6.1479  | -0.0053 | H | 2.5397  | -5.6902 | -0.5856 |
| H | -1.2491 | 5.9046  | -1.511  | H | 3.1744  | -4.9872 | -2.0597 |
| H | 1.515   | 1.8111  | 1.1858  | H | -0.5018 | -2.3455 | 1.289   |

|   |         |         |         |   |         |         |         |
|---|---------|---------|---------|---|---------|---------|---------|
| H | 0.6982  | 1.4664  | -0.3298 | H | 0.0273  | -1.5876 | -0.2036 |
| H | 3.0737  | 3.3356  | 0.1791  | H | -1.5506 | -4.196  | 0.1474  |
| H | 3.168   | 3.9015  | -2.1672 | H | -1.6875 | -4.4415 | -2.2583 |
| H | 1.8411  | 2.8337  | -2.5685 | H | -0.8025 | -2.9577 | -2.5419 |
| H | 1.0432  | 5.1406  | -2.4918 | H | 0.6868  | -4.8665 | -2.8469 |
| H | 1.7395  | 5.3947  | -0.9063 | H | 0.239   | -5.5426 | -1.2961 |
| H | -0.3116 | 2.3311  | -2.1011 | H | 1.1333  | -1.8551 | -2.0948 |
| H | -1.8447 | 3.0465  | -1.6301 | H | 2.8431  | -2.0995 | -1.7742 |
| H | -0.8871 | 3.8005  | -2.8822 | H | 2.0799  | -2.9521 | -3.0947 |
| H | 1.0719  | 4.0225  | 2.1965  | H | 0.6519  | -4.4251 | 1.9516  |
| H | 5.3675  | 2.0544  | -0.1345 | H | -4.0727 | -3.6469 | 0.4885  |
| H | 1.8055  | -1.0212 | -3.6858 | H | -2.5297 | 0.2357  | -3.6446 |
| H | 2.8749  | -2.0419 | -4.6221 | H | -4.0563 | 0.7261  | -4.344  |
| H | 4.7551  | -1.5986 | -3.1827 | H | -5.3301 | -0.2349 | -2.5452 |
| H | 4.0101  | -0.0621 | -3.6003 | H | -4.1659 | -1.4343 | -3.089  |
| H | 3.0046  | -3.712  | -2.8868 | H | -4.4534 | 2.3799  | -2.6337 |
| H | 1.3144  | -3.3624 | -3.1888 | H | -2.8438 | 2.6311  | -3.2791 |
| H | 4.1685  | -1.2929 | 1.1999  | H | -3.8504 | 0.0631  | 1.6299  |
| H | 2.4638  | -0.9217 | 1.0121  | H | -2.1967 | 0.2962  | 1.0927  |
| H | 3.781   | -3.6515 | 1.4282  | H | -4.2983 | 2.4184  | 1.7518  |
| H | 1.6291  | -4.7312 | 1.5068  | H | -2.7027 | 4.1845  | 1.3628  |
| H | 0.7691  | -3.2282 | 1.2637  | H | -1.4327 | 3.0546  | 0.951   |
| H | 2.6076  | -4.6589 | -0.7014 | H | -4.0072 | 3.5905  | -0.5865 |
| H | 0.8783  | -4.433  | -0.8441 | H | -2.3757 | 3.9735  | -1.0909 |
| H | 1.7534  | -1.7603 | 4.7383  | H | -1.1179 | 1.6852  | 4.5789  |
| H | 3.5847  | -3.1474 | 5.0387  | H | -3.2385 | 2.3229  | 5.2417  |
| H | 4.4605  | -3.9691 | 3.6387  | H | -4.6076 | 2.6467  | 4.0496  |
| H | 0.7352  | -0.887  | -1.766  | H | -1.1492 | 0.6386  | -1.9965 |
| H | -0.1378 | -2.348  | -1.3691 | H | -0.7957 | 2.3385  | -1.7891 |
| H | 0.605   | -1.3947 | -0.0894 | H | -0.8996 | 1.2819  | -0.3839 |
| H | -6.8088 | -2.4336 | -2.1336 | H | 2.4219  | 5.8135  | -1.4643 |
| H | -5.4336 | -2.3549 | -3.2375 | H | 3.669   | 5.7001  | -0.2236 |
| H | -4.9293 | -4.6085 | 0.3321  | H | 5.4084  | 3.5469  | -0.7378 |
| H | -6.4037 | -3.6879 | 0.104   | H | 5.553   | 3.1052  | -2.4331 |
| H | -4.1246 | 0.9426  | -0.1181 | H | 1.1219  | 1.7998  | 0.7483  |
| H | -4.5901 | 0.265   | 1.4072  | H | 1.7018  | 0.7965  | -0.5328 |
| H | -2.0876 | -0.4559 | -0.2202 | H | 3.0073  | 1.4858  | 2.1346  |
| H | -1.3681 | -1.8552 | 1.6325  | H | 4.9753  | 1.8468  | 1.0907  |
| H | -2.7842 | -1.4462 | 2.5851  | H | 5.0722  | 0.0978  | 1.0563  |
| H | -2.6678 | -3.015  | -0.0244 | H | 5.607   | 1.003   | -1.1595 |
| H | -3.0911 | -3.6321 | 1.5642  | H | 4.1325  | 0.0698  | -1.2371 |
| H | -1.2163 | 0.3036  | 3.3585  | H | 2.0066  | -0.395  | 3.6454  |
| H | -5.4391 | -3.2208 | 2.5308  | H | 3.9931  | 1.5619  | -3.5176 |
| H | -5.0212 | -1.5152 | 2.6137  | H | 2.5528  | 0.9434  | -2.7057 |
| H | -6.4898 | -2.0108 | 1.7783  | H | 2.5962  | 2.616   | -3.2443 |
| H | -5.0717 | 1.0475  | -1.8282 | H | 0.8487  | 3.7057  | 1.2575  |
| H | 5.2676  | -2.4471 | -0.6909 | H | -5.6337 | 0.5968  | 0.0069  |



|             |                  |                  |                  |              |                  |                  |                  |
|-------------|------------------|------------------|------------------|--------------|------------------|------------------|------------------|
| H           | -5.5903          | -4.5331          | -2.0404          | H            | 3.649            | 4.58             | -3.0168          |
| H           | -4.0444          | -3.7179          | -1.8275          | H            | 4.9004           | 5.4738           | -2.1803          |
| <b>4b-9</b> | <b>X axis(Å)</b> | <b>Y axis(Å)</b> | <b>Z axis(Å)</b> | <b>4b-10</b> | <b>X axis(Å)</b> | <b>Y axis(Å)</b> | <b>Z axis(Å)</b> |
| C           | -1.6337          | 5.3728           | -0.6905          | C            | -0.6398          | 5.6506           | -0.8307          |
| C           | -1.5931          | 4.8145           | 0.7313           | C            | -1.0021          | 4.9378           | 0.4726           |
| C           | -0.83            | 3.4851           | 0.8334           | C            | -0.4599          | 3.4996           | 0.5301           |
| C           | 0.5869           | 3.5809           | 0.1925           | C            | 1.0723           | 3.4636           | 0.2541           |
| C           | 0.498            | 4.066            | -1.3022          | C            | 1.4146           | 4.1226           | -1.1339          |
| C           | -0.2512          | 5.4252           | -1.3476          | C            | 0.855            | 5.572            | -1.1561          |
| C           | 1.3955           | 2.2695           | 0.2811           | C            | 1.7046           | 2.0577           | 0.354            |
| C           | 2.8021           | 2.3908           | -0.3474          | C            | 3.2359           | 2.1029           | 0.1416           |
| C           | 2.7801           | 2.9934           | -1.7607          | C            | 3.6211           | 2.8074           | -1.1672          |
| C           | 1.9379           | 4.2677           | -1.8487          | C            | 2.9592           | 4.1817           | -1.3006          |
| C           | -0.23            | 3.0768           | -2.2527          | C            | 0.8423           | 3.3587           | -2.3575          |
| C           | -0.7621          | 3.0585           | 2.281            | C            | -0.7985          | 2.8834           | 1.8673           |
| O           | -0.1314          | 3.6206           | 3.1662           | O            | -0.2905          | 3.1777           | 2.9414           |
| O           | 1.3504           | 4.5837           | 0.911            | O            | 1.7289           | 4.2734           | 1.2677           |
| C           | 3.4801           | 1.0441           | -0.3687          | C            | 3.8333           | 0.7216           | 0.2034           |
| O           | 2.7848           | 0.018            | -0.9998          | O            | 3.3449           | -0.2114          | -0.7044          |
| C           | 4.6591           | 0.7465           | 0.1716           | C            | 4.7672           | 0.3176           | 1.0615           |
| C           | 2.8939           | -2.1656          | -3.15            | C            | 4.0389           | -2.3153          | -2.8477          |
| C           | 4.0413           | -1.594           | -2.3154          | C            | 4.8788           | -1.8457          | -1.659           |
| C           | 3.5945           | -1.1723          | -0.9078          | C            | 4.0249           | -1.4585          | -0.4423          |
| C           | 2.8601           | -2.333           | -0.1738          | C            | 3.0385           | -2.5986          | -0.0513          |
| C           | 1.6232           | -2.8364          | -1.0084          | C            | 2.1151           | -2.9821          | -1.2666          |
| C           | 2.111            | -3.2631          | -2.4203          | C            | 3.0101           | -3.387           | -2.4698          |
| C           | 2.4352           | -1.9945          | 1.2741           | C            | 2.1892           | -2.2882          | 1.2037           |
| C           | 1.7558           | -3.1959          | 1.9711           | C            | 1.2455           | -3.4556          | 1.5717           |
| C           | 0.5913           | -3.7747          | 1.1507           | C            | 0.3862           | -3.9198          | 0.3847           |
| C           | 0.9993           | -4.0701          | -0.2969          | C            | 1.2286           | -4.1941          | -0.8656          |
| C           | 1.3592           | -2.8886          | 3.4015           | C            | 0.4113           | -3.1623          | 2.8038           |
| C           | 0.3583           | -1.829           | 3.6995           | C            | -0.5538          | -2.0284          | 2.815            |
| C           | 1.8779           | -3.5368          | 4.4581           | C            | 0.4939           | -3.8888          | 3.9312           |
| O           | -0.183           | -1.1488          | 2.8368           | O            | -0.7133          | -1.2685          | 1.8681           |
| C           | 0.4975           | -1.7818          | -1.179           | C            | 1.1677           | -1.8433          | -1.7257          |
| C           | 4.7819           | -0.6749          | -0.1132          | C            | 4.9217           | -1.0858          | 0.717            |
| O           | 5.714            | -1.3583          | 0.2884           | O            | 5.6538           | -1.8485          | 1.3329           |
| C           | -4.3234          | -2.9506          | -2.2564          | C            | -7.1717          | -1.5895          | -1.0066          |
| C           | -3.8271          | -1.5499          | -1.9886          | C            | -6.246           | -0.719           | -0.1991          |
| C           | -4.1228          | -0.8665          | -0.8557          | C            | -4.8976          | -0.7247          | -0.319           |
| C           | -5.0784          | -1.4355          | 0.212            | C            | -4.1855          | -1.6667          | -1.3051          |
| C           | -5.7077          | -2.7974          | -0.1937          | C            | -5.1714          | -2.2913          | -2.3325          |
| C           | -3.4857          | 0.4509           | -0.4379          | C            | -3.9652          | 0.1637           | 0.4958           |
| C           | -2.654           | 0.2584           | 0.8521           | C            | -2.9457          | 0.9247           | -0.3774          |
| C           | -3.5265          | -0.3474          | 1.9703           | C            | -2.1678          | -0.0549          | -1.2643          |
| C           | -4.2603          | -1.6159          | 1.5161           | C            | -3.1145          | -0.8951          | -2.1182          |
| C           | -1.9301          | 1.5233           | 1.2685           | C            | -1.9902          | 1.8042           | 0.3993           |

|   |         |         |         |   |         |         |         |
|---|---------|---------|---------|---|---------|---------|---------|
| C | -1.5147 | 1.835   | 2.4955  | C | -1.8162 | 1.8578  | 1.719   |
| O | -1.6137 | 2.4211  | 0.2497  | O | -1.2181 | 2.6702  | -0.3767 |
| C | -6.2691 | -0.4783 | 0.4638  | C | -3.5149 | -2.8102 | -0.5079 |
| C | -2.9344 | -1.0194 | -3.067  | C | -6.9743 | 0.1309  | 0.7906  |
| O | -2.6314 | -1.6744 | -4.0591 | O | -6.6021 | 0.3139  | 1.9421  |
| O | 3.7789  | -3.4541 | -0.0742 | O | 3.8169  | -3.7828 | 0.2675  |
| C | -4.7545 | -3.6742 | -0.9868 | C | -6.4689 | -2.7576 | -1.6874 |
| H | -2.3197 | 4.7739  | -1.2995 | H | -1.227  | 5.2287  | -1.654  |
| H | -2.0582 | 6.3837  | -0.6672 | H | -0.9362 | 6.7038  | -0.7583 |
| H | -1.1318 | 5.5626  | 1.389   | H | -0.6145 | 5.5219  | 1.3171  |
| H | -2.6255 | 4.6877  | 1.0817  | H | -2.0952 | 4.938   | 0.5723  |
| H | 0.3434  | 6.1985  | -0.8439 | H | 1.3985  | 6.1941  | -0.433  |
| H | -0.363  | 5.7603  | -2.3866 | H | 1.0309  | 6.0294  | -2.1381 |
| H | 1.5335  | 1.9889  | 1.3339  | H | 1.5258  | 1.6387  | 1.353   |
| H | 0.8343  | 1.4502  | -0.1824 | H | 1.2311  | 1.371   | -0.357  |
| H | 3.3922  | 3.0667  | 0.2875  | H | 3.6686  | 2.6896  | 0.9645  |
| H | 3.806   | 3.2263  | -2.0747 | H | 4.7105  | 2.935   | -1.2105 |
| H | 2.4085  | 2.2604  | -2.4873 | H | 3.3576  | 2.1856  | -2.0315 |
| H | 1.904   | 4.6007  | -2.8941 | H | 3.22    | 4.6101  | -2.2768 |
| H | 2.4483  | 5.0681  | -1.2979 | H | 3.3969  | 4.856   | -0.5532 |
| H | 0.1783  | 2.0639  | -2.2042 | H | 1.1123  | 2.2994  | -2.3583 |
| H | -1.3006 | 2.9972  | -2.055  | H | -0.2458 | 3.4118  | -2.4279 |
| H | -0.1378 | 3.41    | -3.2937 | H | 1.2272  | 3.7882  | -3.2905 |
| H | 1.283   | 4.3993  | 1.8715  | H | 1.4191  | 3.9721  | 2.1484  |
| H | 5.3599  | 1.3538  | 0.7108  | H | 5.2755  | 0.843   | 1.8468  |
| H | 2.2183  | -1.355  | -3.4451 | H | 3.5362  | -1.4541 | -3.3014 |
| H | 3.2983  | -2.5744 | -4.0837 | H | 4.7048  | -2.7152 | -3.6218 |
| H | 4.8405  | -2.3433 | -2.2493 | H | 5.5824  | -2.6429 | -1.3868 |
| H | 4.4646  | -0.736  | -2.8533 | H | 5.488   | -0.992  | -1.9828 |
| H | 2.7524  | -4.1506 | -2.3423 | H | 3.5474  | -4.3166 | -2.2409 |
| H | 1.2562  | -3.5631 | -3.0399 | H | 2.387   | -3.6074 | -3.3459 |
| H | 3.3205  | -1.7326 | 1.8681  | H | 2.8491  | -2.1213 | 2.0651  |
| H | 1.7871  | -1.113  | 1.2818  | H | 1.6311  | -1.3586 | 1.0595  |
| H | 2.5123  | -3.9936 | 2.0176  | H | 1.8944  | -4.3083 | 1.822   |
| H | 0.2416  | -4.706  | 1.6146  | H | -0.1519 | -4.8373 | 0.6555  |
| H | -0.2692 | -3.0968 | 1.1549  | H | -0.3842 | -3.1795 | 0.1465  |
| H | 1.7079  | -4.9084 | -0.2985 | H | 1.8524  | -5.0787 | -0.6835 |
| H | 0.1195  | -4.4233 | -0.85   | H | 0.5602  | -4.4662 | -1.6926 |
| H | 0.1227  | -1.6796 | 4.767   | H | -1.1317 | -1.9003 | 3.7462  |
| H | 1.5956  | -3.3163 | 5.4833  | H | -0.1025 | -3.6778 | 4.8139  |
| H | 2.6159  | -4.3234 | 4.3228  | H | 1.1753  | -4.7325 | 4.0031  |
| H | 0.7716  | -0.9589 | -1.8419 | H | 1.6852  | -1.0258 | -2.2314 |
| H | -0.3943 | -2.242  | -1.6214 | H | 0.4274  | -2.2212 | -2.4412 |
| H | 0.1921  | -1.3389 | -0.2286 | H | 0.6173  | -1.4028 | -0.8926 |
| H | -5.162  | -2.8991 | -2.9619 | H | -7.969  | -1.991  | -0.3689 |
| H | -3.541  | -3.5575 | -2.7277 | H | -7.6569 | -0.9648 | -1.7675 |
| H | -6.0524 | -3.3398 | 0.6957  | H | -5.4239 | -1.5558 | -3.1088 |

|              |                  |                  |                  |              |                  |                  |                  |
|--------------|------------------|------------------|------------------|--------------|------------------|------------------|------------------|
| H            | -6.6018          | -2.6302          | -0.8107          | H            | -4.6976          | -3.133           | -2.8533          |
| H            | -2.8372          | 0.8538           | -1.2169          | H            | -4.5182          | 0.9124           | 1.0693           |
| H            | -4.2582          | 1.2148           | -0.2921          | H            | -3.4478          | -0.467           | 1.2294           |
| H            | -1.8684          | -0.4735          | 0.617            | H            | -3.52            | 1.5941           | -1.035           |
| H            | -2.908           | -0.6098          | 2.8369           | H            | -1.4856          | 0.4887           | -1.93            |
| H            | -4.2517          | 0.3947           | 2.326            | H            | -1.5433          | -0.7079          | -0.647           |
| H            | -3.5126          | -2.4087          | 1.3801           | H            | -3.6078          | -0.2204          | -2.8315          |
| H            | -4.9165          | -1.9509          | 2.3298           | H            | -2.5227          | -1.5967          | -2.7202          |
| H            | -1.5902          | 1.2986           | 3.4216           | H            | -2.2684          | 1.2995           | 2.5157           |
| H            | -6.9731          | -0.9152          | 1.1821           | H            | -3.0058          | -3.5113          | -1.1793          |
| H            | -5.9683          | 0.492            | 0.868            | H            | -2.767           | -2.442           | 0.2003           |
| H            | -6.8192          | -0.2844          | -0.4648          | H            | -4.2454          | -3.3813          | 0.0753           |
| H            | -2.5597          | 0.0048           | -2.9504          | H            | -7.9205          | 0.5581           | 0.4169           |
| H            | 4.623            | -3.1315          | 0.3055           | H            | 4.5086           | -3.5349          | 0.9164           |
| H            | -5.2465          | -4.6174          | -1.2508          | H            | -6.271           | -3.5526          | -0.9595          |
| H            | -3.8776          | -3.9327          | -0.3814          | H            | -7.1298          | -3.1895          | -2.448           |
| <b>4b-11</b> | <b>X axis(Å)</b> | <b>Y axis(Å)</b> | <b>Z axis(Å)</b> | <b>4b-12</b> | <b>X axis(Å)</b> | <b>Y axis(Å)</b> | <b>Z axis(Å)</b> |
| C            | -3.0434          | 4.8387           | -0.3615          | C            | -0.9587          | 5.5786           | -0.5235          |
| C            | -2.5591          | 4.3152           | 0.9925           | C            | -1.0753          | 4.911            | 0.8454           |
| C            | -1.5876          | 3.1347           | 0.8563           | C            | -0.5081          | 3.478            | 0.8605           |
| C            | -0.4048          | 3.4816           | -0.097           | C            | 0.9527           | 3.4457           | 0.3226           |
| C            | -0.9337          | 3.9073           | -1.5172          | C            | 1.0401           | 4.0692           | -1.1209          |
| C            | -1.9002          | 5.112            | -1.3467          | C            | 0.4606           | 5.5099           | -1.0912          |
| C            | 0.6454           | 2.3584           | -0.2255          | C            | 1.6094           | 2.0484           | 0.3431           |
| C            | 1.819            | 2.7559           | -1.1485          | C            | 3.0791           | 2.0931           | -0.1428          |
| C            | 1.3362           | 3.2459           | -2.5198          | C            | 3.2299           | 2.7877           | -1.5048          |
| C            | 0.2722           | 4.3422           | -2.3964          | C            | 2.5319           | 4.1478           | -1.5489          |
| C            | -1.683           | 2.7856           | -2.2862          | C            | 0.2806           | 3.2599           | -2.2059          |
| C            | -1.0853          | 2.7046           | 2.216            | C            | -0.6157          | 2.927            | 2.2649           |
| O            | -0.4046          | 3.3826           | 2.9736           | O            | 0.0963           | 3.2332           | 3.2122           |
| O            | 0.2976           | 4.6296           | 0.448            | O            | 1.7654           | 4.2878           | 1.1849           |
| C            | 2.8047           | 1.6242           | -1.2948          | C            | 3.6715           | 0.7087           | -0.1939          |
| O            | 2.2781           | 0.3434           | -1.4306          | O            | 3.0412           | -0.1985          | -1.0365          |
| C            | 4.1297           | 1.744            | -1.2564          | C            | 4.7233           | 0.2774           | 0.4983           |
| C            | 2.2853           | -2.3187          | -2.9584          | C            | 3.2634           | -2.3127          | -3.2441          |
| C            | 3.4147           | -1.2972          | -2.8192          | C            | 4.3209           | -1.8938          | -2.2207          |
| C            | 3.392            | -0.5764          | -1.4642          | C            | 3.7092           | -1.468           | -0.8788          |
| C            | 3.3698           | -1.5882          | -0.2771          | C            | 2.7545           | -2.5623          | -0.3167          |
| C            | 2.1539           | -2.5779          | -0.3965          | C            | 1.6091           | -2.8827          | -1.3494          |
| C            | 2.2144           | -3.29            | -1.7756          | C            | 2.2565           | -3.3276          | -2.6898          |
| C            | 3.3816           | -0.9206          | 1.1172           | C            | 2.1641           | -2.2183          | 1.0694           |
| C            | 3.3943           | -1.9572          | 2.2645           | C            | 1.2191           | -3.3195          | 1.5999           |
| C            | 2.3046           | -3.0342          | 2.1254           | C            | 0.1451           | -3.7201          | 0.5773           |
| C            | 2.2639           | -3.6495          | 0.7238           | C            | 0.7423           | -4.045           | -0.7944          |
| C            | 3.3719           | -1.2919          | 3.6274           | C            | 0.5929           | -2.9926          | 2.9424           |
| C            | 2.1938           | -0.4845          | 4.0512           | C            | -0.1863          | -1.7371          | 3.1357           |
| C            | 4.385            | -1.3856          | 4.5048           | C            | 0.6895           | -3.804           | 4.0091           |

|   |         |         |         |   |         |         |         |
|---|---------|---------|---------|---|---------|---------|---------|
| O | 1.2008  | -0.3229 | 3.352   | O | -0.2008 | -0.8219 | 2.3218  |
| C | 0.7684  | -1.8955 | -0.2556 | C | 0.6528  | -1.6933 | -1.6396 |
| C | 4.5723  | 0.3632  | -1.3549 | C | 4.7999  | -1.1226 | 0.1099  |
| O | 5.7495  | 0.0353  | -1.2963 | O | 5.6175  | -1.9033 | 0.578   |
| C | -3.6949 | -4.3345 | -1.436  | C | -5.3191 | -3.2685 | -0.6171 |
| C | -3.1726 | -2.9195 | -1.4124 | C | -4.2244 | -2.4022 | -0.0548 |
| C | -3.6903 | -1.954  | -0.6154 | C | -3.9644 | -1.141  | -0.469  |
| C | -4.977  | -2.1844 | 0.205   | C | -4.8646 | -0.4296 | -1.4922 |
| C | -5.5797 | -3.6056 | 0.0155  | C | -6.172  | -1.2244 | -1.7737 |
| C | -3.0559 | -0.5917 | -0.3735 | C | -2.7938 | -0.2997 | 0.0214  |
| C | -2.7493 | -0.3709 | 1.1286  | C | -3.2677 | 1.0374  | 0.6086  |
| C | -3.9941 | -0.6109 | 1.9963  | C | -4.1226 | 1.8056  | -0.415  |
| C | -4.641  | -1.9684 | 1.7019  | C | -5.2858 | 0.9549  | -0.9284 |
| C | -2.1594 | 0.9922  | 1.4067  | C | -2.1094 | 1.8739  | 1.0921  |
| C | -1.4722 | 1.3311  | 2.496   | C | -1.7178 | 1.9851  | 2.3602  |
| O | -2.3151 | 1.9637  | 0.4244  | O | -1.4032 | 2.6038  | 0.1362  |
| C | -6.0836 | -1.1929 | -0.2335 | C | -4.1018 | -0.2544 | -2.8253 |
| C | -2.0162 | -2.6884 | -2.3317 | C | -3.4407 | -3.078  | 1.0197  |
| O | -1.4656 | -3.5937 | -2.9487 | O | -3.1904 | -2.5667 | 2.1042  |
| O | 4.5727  | -2.3988 | -0.3506 | O | 3.515   | -3.7864 | -0.1405 |
| C | -4.5185 | -4.6713 | -0.1985 | C | -5.922  | -2.7205 | -1.9058 |
| H | -3.7501 | 4.1232  | -0.7966 | H | -1.668  | 5.1169  | -1.2191 |
| H | -3.6111 | 5.764   | -0.2061 | H | -1.2607 | 6.6293  | -0.438  |
| H | -2.0806 | 5.1374  | 1.5397  | H | -0.5546 | 5.5296  | 1.5878  |
| H | -3.4361 | 4.019   | 1.5823  | H | -2.1341 | 4.9077  | 1.1349  |
| H | -1.3444 | 5.9911  | -0.9956 | H | 1.1062  | 6.1609  | -0.4873 |
| H | -2.3264 | 5.394   | -2.318  | H | 0.4618  | 5.9386  | -2.1016 |
| H | 1.0715  | 2.1304  | 0.7604  | H | 1.6154  | 1.6557  | 1.3684  |
| H | 0.1688  | 1.4373  | -0.5791 | H | 1.0217  | 1.3407  | -0.2524 |
| H | 2.3462  | 3.5938  | -0.6701 | H | 3.6533  | 2.6801  | 0.5879  |
| H | 2.1853  | 3.6439  | -3.0903 | H | 4.2951  | 2.9303  | -1.7286 |
| H | 0.9445  | 2.4083  | -3.1097 | H | 2.8395  | 2.1514  | -2.3085 |
| H | -0.0706 | 4.6216  | -3.4009 | H | 2.6147  | 4.5582  | -2.5635 |
| H | 0.7411  | 5.2431  | -1.9802 | H | 3.0786  | 4.8447  | -0.9005 |
| H | -1.1135 | 1.8538  | -2.3348 | H | 0.5753  | 2.2075  | -2.2325 |
| H | -2.6571 | 2.5441  | -1.857  | H | -0.8036 | 3.2844  | -2.0808 |
| H | -1.8798 | 3.0962  | -3.3197 | H | 0.4815  | 3.6736  | -3.2017 |
| H | 0.5016  | 4.4502  | 1.39    | H | 1.6288  | 3.9937  | 2.1112  |
| H | 4.7546  | 2.6083  | -1.1395 | H | 5.3541  | 0.7805  | 1.2053  |
| H | 1.3299  | -1.7952 | -3.0743 | H | 2.7374  | -1.4232 | -3.6083 |
| H | 2.4297  | -2.89   | -3.8832 | H | 3.7627  | -2.7447 | -4.1197 |
| H | 4.3756  | -1.8085 | -2.9594 | H | 5.0186  | -2.7274 | -2.0698 |
| H | 3.3266  | -0.5711 | -3.6376 | H | 4.9084  | -1.0712 | -2.6483 |
| H | 3.0913  | -3.9491 | -1.8177 | H | 2.7718  | -4.2877 | -2.5561 |
| H | 1.3412  | -3.9426 | -1.9015 | H | 1.4788  | -3.5061 | -3.4433 |
| H | 4.2868  | -0.3085 | 1.2256  | H | 2.9728  | -2.1059 | 1.8032  |
| H | 2.5354  | -0.2339 | 1.2144  | H | 1.6613  | -1.2511 | 1.0131  |

|             |                  |                  |                  |             |                  |                  |                  |
|-------------|------------------|------------------|------------------|-------------|------------------|------------------|------------------|
| H           | 4.3522           | -2.4926          | 2.1826           | H           | 1.8451           | -4.2124          | 1.747            |
| H           | 2.4855           | -3.8335          | 2.8558           | H           | -0.4009          | -4.6008          | 0.9394           |
| H           | 1.3154           | -2.6318          | 2.3674           | H           | -0.5996          | -2.9241          | 0.4733           |
| H           | 3.164            | -4.2611          | 0.5809           | H           | 1.3388           | -4.9627          | -0.7135          |
| H           | 1.4187           | -4.3475          | 0.6659           | H           | -0.0724          | -4.2791          | -1.4917          |
| H           | 2.2616           | -0.0274          | 5.0532           | H           | -0.7428          | -1.6597          | 4.0852           |
| H           | 4.3672           | -0.9072          | 5.4794           | H           | 0.2353           | -3.57            | 4.9674           |
| H           | 5.2786           | -1.9566          | 4.2662           | H           | 1.2347           | -4.742           | 3.9506           |
| H           | 0.516            | -1.2572          | -1.1041          | H           | 1.113            | -0.903           | -2.2359          |
| H           | -0.0228          | -2.6514          | -0.1909          | H           | -0.2186          | -2.0322          | -2.2133          |
| H           | 0.6878           | -1.2775          | 0.6419           | H           | 0.2742           | -1.2262          | -0.7269          |
| H           | -4.3007          | -4.4746          | -2.3398          | H           | -4.943           | -4.2796          | -0.8147          |
| H           | -2.8674          | -5.0523          | -1.4856          | H           | -6.1083          | -3.3637          | 0.1397           |
| H           | -6.2043          | -3.8756          | 0.8763           | H           | -6.8927          | -1.0716          | -0.9586          |
| H           | -6.2484          | -3.6199          | -0.8565          | H           | -6.6595          | -0.8508          | -2.6829          |
| H           | -2.1185          | -0.4639          | -0.9203          | H           | -2.1949          | -0.8304          | 0.7627           |
| H           | -3.7283          | 0.1848           | -0.757           | H           | -2.1098          | -0.122           | -0.8182          |
| H           | -1.995           | -1.1185          | 1.4166           | H           | -3.9108          | 0.8148           | 1.4729           |
| H           | -3.7217          | -0.5798          | 3.0592           | H           | -4.5231          | 2.7178           | 0.0453           |
| H           | -4.7243          | 0.194            | 1.848            | H           | -3.5122          | 2.1331           | -1.2654          |
| H           | -3.959           | -2.7568          | 2.0472           | H           | -5.986           | 0.814            | -0.0933          |
| H           | -5.55            | -2.0608          | 2.31             | H           | -5.8321          | 1.5214           | -1.6935          |
| H           | -1.2025          | 0.758            | 3.3625           | H           | -2.0827          | 1.5117           | 3.2506           |
| H           | -7.0106          | -1.3744          | 0.3233           | H           | -4.7416          | 0.2105           | -3.5844          |
| H           | -5.8155          | -0.145           | -0.0731          | H           | -3.2166          | 0.3812           | -2.7246          |
| H           | -6.3098          | -1.3048          | -1.3008          | H           | -3.7601          | -1.2161          | -3.2235          |
| H           | -1.6831          | -1.6498          | -2.4591          | H           | -3.1402          | -4.1134          | 0.787            |
| H           | 5.3467           | -1.8052          | -0.4467          | H           | 4.3186           | -3.5782          | 0.3805           |
| H           | -4.9929          | -5.6508          | -0.3281          | H           | -5.2532          | -2.9237          | -2.7501          |
| H           | -3.8691          | -4.7458          | 0.682            | H           | -6.8633          | -3.2398          | -2.1196          |
| <b>4c-1</b> | <b>X axis(Å)</b> | <b>Y axis(Å)</b> | <b>Z axis(Å)</b> | <b>4c-2</b> | <b>X axis(Å)</b> | <b>Y axis(Å)</b> | <b>Z axis(Å)</b> |
| C           | -0.7154          | 5.8082           | -0.3467          | C           | 0.0056           | 5.6327           | 1.1087           |
| C           | -0.8146          | 4.9733           | 0.9299           | C           | -0.0436          | 5.2572           | -0.3723          |
| C           | -0.3112          | 3.5329           | 0.7375           | C           | -0.3165          | 3.7598           | -0.5912          |
| C           | 1.121            | 3.5077           | 0.1287           | C           | -1.5967          | 3.301            | 0.1694           |
| C           | 1.1824           | 4.3034           | -1.2248          | C           | -1.4988          | 3.6256           | 1.7025           |
| C           | 0.676            | 5.7523           | -0.9846          | C           | -1.2214          | 5.1436           | 1.8838           |
| C           | 1.7032           | 2.0893           | -0.0559          | C           | -1.9626          | 1.816            | -0.0405          |
| C           | 3.1635           | 2.1188           | -0.5722          | C           | -3.2979          | 1.4299           | 0.651            |
| C           | 3.2936           | 2.9753           | -1.846           | C           | -3.2941          | 1.8356           | 2.1381           |
| C           | 2.6599           | 4.3623           | -1.7017          | C           | -2.8585          | 3.2852           | 2.3705           |
| C           | 0.3424           | 3.6775           | -2.3691          | C           | -0.3937          | 2.8338           | 2.4501           |
| C           | -0.3688          | 2.7994           | 2.0575           | C           | -0.4181          | 3.4744           | -2.0714          |
| O           | 0.3611           | 2.9892           | 3.0208           | O           | -1.3367          | 3.8056           | -2.8085          |
| O           | 2.0077           | 4.1989           | 1.0491           | O           | -2.7173          | 4.0725           | -0.3422          |
| C           | 3.7125           | 0.714            | -0.7204          | C           | -3.637           | -0.0366          | 0.4497           |
| O           | 3.503            | -0.1238          | 0.374            | O           | -3.0349          | -0.6647          | -0.6378          |

|   |         |         |         |   |         |         |         |
|---|---------|---------|---------|---|---------|---------|---------|
| C | 4.3754  | 0.1972  | -1.7537 | C | -4.4361 | -0.7874 | 1.2071  |
| C | 4.8328  | -1.9092 | 2.4804  | C | -3.2819 | -2.4382 | -3.1321 |
| C | 5.3014  | -1.6084 | 1.0556  | C | -4.1859 | -2.3979 | -1.8979 |
| C | 4.1307  | -1.3908 | 0.0855  | C | -3.4185 | -2.0562 | -0.6133 |
| C | 3.1294  | -2.5825 | 0.13    | C | -2.1969 | -3.0023 | -0.4142 |
| C | 2.5868  | -2.8126 | 1.5892  | C | -1.2261 | -2.9258 | -1.6511 |
| C | 3.7931  | -3.0336 | 2.5436  | C | -2.0234 | -3.2924 | -2.9333 |
| C | 1.9581  | -2.4587 | -0.8708 | C | -1.427  | -2.7608 | 0.9046  |
| C | 1.0248  | -3.6903 | -0.8219 | C | -0.2342 | -3.7293 | 1.0718  |
| C | 0.539   | -4.0105 | 0.6013  | C | 0.6968  | -3.7316 | -0.1508 |
| C | 1.6961  | -4.087  | 1.6029  | C | -0.0746 | -3.9515 | -1.4571 |
| C | -0.1194 | -3.5892 | -1.8098 | C | 0.526   | -3.5069 | 2.3649  |
| C | -1.1256 | -2.5003 | -1.6906 | C | 1.1508  | -2.1882 | 2.6574  |
| C | -0.2927 | -4.4578 | -2.82   | C | 0.6747  | -4.4601 | 3.3     |
| O | -1.0766 | -1.6269 | -0.8317 | O | 1.0575  | -1.2221 | 1.9092  |
| C | 1.7321  | -1.6413 | 2.1437  | C | -0.5744 | -1.5341 | -1.8638 |
| C | 4.6503  | -1.1613 | -1.314  | C | -4.3424 | -2.0965 | 0.5801  |
| O | 5.1987  | -1.9936 | -2.0239 | O | -4.9049 | -3.0898 | 1.02    |
| C | -5.7542 | -2.9921 | -0.4986 | C | 5.7153  | -1.241  | 1.3424  |
| C | -4.618  | -2.2424 | 0.1558  | C | 4.4535  | -0.4328 | 1.147   |
| C | -4.6177 | -0.9024 | 0.361   | C | 3.9285  | -0.1385 | -0.0681 |
| C | -5.8035 | -0.0242 | -0.0879 | C | 4.6329  | -0.5661 | -1.3694 |
| C | -6.775  | -0.7814 | -1.0362 | C | 6.092   | -1.0365 | -1.1179 |
| C | -3.4887 | -0.1222 | 1.0254  | C | 2.609   | 0.5891  | -0.2977 |
| C | -2.9996 | 1.0661  | 0.1714  | C | 2.7445  | 1.7931  | -1.2482 |
| C | -4.1787 | 1.9878  | -0.1727 | C | 3.3779  | 1.3472  | -2.5765 |
| C | -5.2943 | 1.2141  | -0.8716 | C | 4.7115  | 0.6365  | -2.3466 |
| C | -1.8866 | 1.8739  | 0.8015  | C | 1.416   | 2.5029  | -1.4097 |
| C | -1.4184 | 1.7944  | 2.0459  | C | 0.7341  | 2.7183  | -2.5336 |
| O | -1.2682 | 2.7915  | -0.0498 | O | 0.8627  | 3.0061  | -0.2309 |
| C | -6.5935 | 0.4334  | 1.1609  | C | 3.847   | -1.7283 | -2.0219 |
| C | -3.4941 | -3.1384 | 0.5709  | C | 3.8264  | -0.007  | 2.4387  |
| O | -3.3952 | -4.2938 | 0.1685  | O | 4.2233  | -0.408  | 3.5294  |
| O | 3.8527  | -3.7879 | -0.238  | O | -2.685  | -4.3685 | -0.3512 |
| C | -7.0531 | -2.1999 | -0.5672 | C | 6.1987  | -1.9565 | 0.0871  |
| H | -1.4731 | 5.473   | -1.0635 | H | 0.9204  | 5.2312  | 1.5587  |
| H | -0.9615 | 6.8511  | -0.1137 | H | 0.0771  | 6.723   | 1.2008  |
| H | -0.2418 | 5.4698  | 1.7237  | H | -0.8172 | 5.8588  | -0.8667 |
| H | -1.8618 | 4.9709  | 1.2589  | H | 0.9114  | 5.5428  | -0.8318 |
| H | 1.3764  | 6.2913  | -0.3334 | H | -2.0918 | 5.7256  | 1.5536  |
| H | 0.6573  | 6.3076  | -1.931  | H | -1.0887 | 5.3787  | 2.9476  |
| H | 1.7022  | 1.5765  | 0.9143  | H | -2.0836 | 1.6292  | -1.1154 |
| H | 1.0745  | 1.4874  | -0.7224 | H | -1.1515 | 1.1612  | 0.2992  |
| H | 3.7805  | 2.5975  | 0.2016  | H | -4.0987 | 1.9945  | 0.1532  |
| H | 4.3541  | 3.1063  | -2.0968 | H | -4.2998 | 1.7155  | 2.5603  |
| H | 2.8401  | 2.4567  | -2.6995 | H | -2.6428 | 1.1616  | 2.7085  |
| H | 2.7269  | 4.8863  | -2.6639 | H | -2.8069 | 3.472   | 3.4509  |

|             |                  |                  |                  |             |                  |                  |                  |
|-------------|------------------|------------------|------------------|-------------|------------------|------------------|------------------|
| H           | 3.264            | 4.952            | -1.0001          | H           | -3.6458          | 3.9504           | 1.9926           |
| H           | -0.7334          | 3.7303           | -2.1912          | H           | 0.6166           | 3.1189           | 2.1502           |
| H           | 0.522            | 4.211            | -3.3106          | H           | -0.4549          | 3.0195           | 3.5295           |
| H           | 0.5859           | 2.6269           | -2.5469          | H           | -0.4772          | 1.7532           | 2.3081           |
| H           | 1.915            | 3.7885           | 1.9352           | H           | -2.7381          | 3.9785           | -1.3183          |
| H           | 4.6648           | 0.6202           | -2.6961          | H           | -5.0066          | -0.5525          | 2.0849           |
| H           | 4.4271           | -0.9969          | 2.9316           | H           | -3.001           | -1.4162          | -3.4101          |
| H           | 5.6995           | -2.1876          | 3.0919           | H           | -3.8521          | -2.833           | -3.9816          |
| H           | 5.9335           | -2.4349          | 0.7067           | H           | -4.6851          | -3.3696          | -1.7925          |
| H           | 5.943            | -0.7183          | 1.0842           | H           | -4.9788          | -1.6598          | -2.0745          |
| H           | 3.4415           | -3.1364          | 3.5782           | H           | -1.3815          | -3.1923          | -3.8179          |
| H           | 4.2938           | -3.98            | 2.3008           | H           | -2.3245          | -4.3475          | -2.898           |
| H           | 1.4054           | -1.5321          | -0.6897          | H           | -1.1038          | -1.7179          | 0.9582           |
| H           | 2.3496           | -2.3896          | -1.8941          | H           | -2.0957          | -2.9221          | 1.7602           |
| H           | 1.635            | -4.5525          | -1.1299          | H           | -0.664           | -4.7408          | 1.1251           |
| H           | -0.1882          | -3.2673          | 0.945            | H           | 1.2637           | -2.7961          | -0.2116          |
| H           | 0.0083           | -4.9713          | 0.6017           | H           | 1.4433           | -4.5293          | -0.045           |
| H           | 2.2993           | -4.9754          | 1.3759           | H           | -0.4718          | -4.9747          | -1.4641          |
| H           | 1.2872           | -4.254           | 2.6077           | H           | 0.6278           | -3.8986          | -2.2988          |
| H           | -1.9409          | -2.5173          | -2.4338          | H           | 1.7103           | -2.1205          | 3.6065           |
| H           | -1.1199          | -4.3898          | -3.52            | H           | 1.2205           | -4.2969          | 4.225            |
| H           | 0.3953           | -5.2858          | -2.9686          | H           | 0.2483           | -5.4501          | 3.162            |
| H           | 2.316            | -0.7424          | 2.3507           | H           | -1.2701          | -0.7823          | -2.2413          |
| H           | 0.924            | -1.3503          | 1.4675           | H           | -0.1415          | -1.135           | -0.9444          |
| H           | 1.2669           | -1.9246          | 3.0958           | H           | 0.2316           | -1.5941          | -2.605           |
| H           | -5.4454          | -3.2705          | -1.5144          | H           | 6.5041           | -0.5645          | 1.6962           |
| H           | -5.9588          | -3.9245          | 0.0419           | H           | 5.5701           | -1.9992          | 2.1215           |
| H           | -6.3513          | -0.8356          | -2.0485          | H           | 6.7459           | -0.1704          | -0.9456          |
| H           | -7.7211          | -0.2339          | -1.132           | H           | 6.4887           | -1.5455          | -2.0053          |
| H           | -3.8504          | 0.234            | 1.9985           | H           | 1.8921           | -0.1269          | -0.7143          |
| H           | -2.6239          | -0.7503          | 1.2472           | H           | 2.1559           | 0.9321           | 0.6332           |
| H           | -2.6023          | 0.6566           | -0.7682          | H           | 3.4306           | 2.5162           | -0.7833          |
| H           | -4.5641          | 2.473            | 0.7324           | H           | 2.6985           | 0.6853           | -3.127           |
| H           | -3.8481          | 2.7964           | -0.8372          | H           | 3.5531           | 2.2195           | -3.219           |
| H           | -6.1283          | 1.8982           | -1.0753          | H           | 5.1105           | 0.3074           | -3.3148          |
| H           | -4.9131          | 0.897            | -1.8524          | H           | 5.4224           | 1.3797           | -1.9593          |
| H           | -1.6952          | 1.1712           | 2.8739           | H           | 0.9323           | 2.4429           | -3.5513          |
| H           | -7.4699          | 1.0265           | 0.8752           | H           | 4.3549           | -2.0863          | -2.9249          |
| H           | -6.9487          | -0.4194          | 1.7498           | H           | 3.7427           | -2.5798          | -1.3407          |
| H           | -5.9931          | 1.0546           | 1.8329           | H           | 2.8353           | -1.4375          | -2.3202          |
| H           | -2.7449          | -2.7203          | 1.2554           | H           | 2.9855           | 0.6954           | 2.3824           |
| H           | 4.3159           | -3.6255          | -1.0865          | H           | -3.4054          | -4.4109          | 0.312            |
| H           | -7.5419          | -2.1919          | 0.4137           | H           | 5.6138           | -2.8694          | -0.0732          |
| H           | -7.747           | -2.6931          | -1.2578          | H           | 7.2387           | -2.2744          | 0.2245           |
| <b>4c-3</b> | <b>X axis(Å)</b> | <b>Y axis(Å)</b> | <b>Z axis(Å)</b> | <b>4c-4</b> | <b>X axis(Å)</b> | <b>Y axis(Å)</b> | <b>Z axis(Å)</b> |
| C           | -1.0876          | 5.6849           | -0.4254          | C           | 2.2109           | 5.0966           | -0.5088          |
| C           | -1.1158          | 4.876            | 0.8714           | C           | 1.866            | 4.1423           | -1.6537          |

|   |         |         |         |   |         |         |         |
|---|---------|---------|---------|---|---------|---------|---------|
| C | -0.5189 | 3.4682  | 0.7051  | C | 1.0831  | 2.9085  | -1.1825 |
| C | 0.9051  | 3.5258  | 0.08    | C | -0.1706 | 3.3121  | -0.3514 |
| C | 0.8989  | 4.2916  | -1.2918 | C | 0.2288  | 4.2069  | 0.8788  |
| C | 0.2974  | 5.7081  | -1.079  | C | 1.0001  | 5.4525  | 0.3617  |
| C | 1.5812  | 2.1466  | -0.0784 | C | -1.0283 | 2.1136  | 0.1085  |
| C | 3.0317  | 2.264   | -0.61   | C | -2.2912 | 2.5553  | 0.8799  |
| C | 3.0906  | 3.096   | -1.9051 | C | -1.9482 | 3.5013  | 2.0433  |
| C | 2.3642  | 4.4395  | -1.7868 | C | -1.067  | 4.6746  | 1.5994  |
| C | 0.0923  | 3.5831  | -2.4115 | C | 1.1145  | 3.4888  | 1.9323  |
| C | -0.5131 | 2.763   | 2.0416  | C | 0.7026  | 2.0492  | -2.3683 |
| O | 0.2169  | 3.019   | 2.9894  | O | -0.0556 | 2.3707  | -3.2726 |
| O | 1.7517  | 4.2974  | 0.9742  | O | -1.0267 | 4.1278  | -1.1928 |
| C | 3.6749  | 0.8971  | -0.7307 | C | -3.0867 | 1.3329  | 1.2775  |
| O | 3.5214  | 0.0687  | 0.3799  | O | -3.6912 | 0.6618  | 0.2151  |
| C | 4.3715  | 0.4058  | -1.7542 | C | -3.2774 | 0.8312  | 2.496   |
| C | 4.9379  | -1.6143 | 2.5143  | C | -6.4415 | -0.2366 | -0.8395 |
| C | 5.3962  | -1.3048 | 1.0879  | C | -5.9659 | -0.113  | 0.6076  |
| C | 4.2204  | -1.1645 | 0.1101  | C | -4.4681 | -0.4205 | 0.7689  |
| C | 3.2859  | -2.409  | 0.1653  | C | -4.0986 | -1.8003 | 0.1489  |
| C | 2.7492  | -2.6506 | 1.6247  | C | -4.5221 | -1.8732 | -1.3659 |
| C | 3.9612  | -2.7935 | 2.5869  | C | -6.0407 | -1.5671 | -1.4828 |
| C | 2.1148  | -2.361  | -0.8419 | C | -2.61   | -2.1911 | 0.311   |
| C | 1.2489  | -3.64   | -0.7821 | C | -2.319  | -3.5945 | -0.2719 |
| C | 0.7746  | -3.9702 | 0.6427  | C | -2.8082 | -3.7535 | -1.7215 |
| C | 1.9293  | -3.9715 | 1.6501  | C | -4.2638 | -3.3114 | -1.8955 |
| C | 0.1059  | -3.6096 | -1.7756 | C | -0.8693 | -4.0078 | -0.1131 |
| C | -0.9571 | -2.5742 | -1.6716 | C | 0.2103  | -3.2768 | -0.8295 |
| C | -0.0167 | -4.4963 | -2.7775 | C | -0.484  | -5.0421 | 0.6533  |
| O | -0.9619 | -1.6945 | -0.8175 | O | 0.0223  | -2.2595 | -1.485  |
| C | 1.8289  | -1.5214 | 2.1612  | C | -3.7531 | -0.8892 | -2.2875 |
| C | 4.7325  | -0.9242 | -1.2904 | C | -4.0953 | -0.3416 | 2.2311  |
| O | 5.3366  | -1.7309 | -1.9843 | O | -4.3998 | -1.1513 | 3.0965  |
| C | -5.5662 | -3.1322 | -0.7287 | C | 7.0573  | -2.6406 | 0.4246  |
| C | -4.5241 | -2.4434 | 0.1179  | C | 6.2376  | -1.5852 | -0.2821 |
| C | -4.6161 | -1.1454 | 0.4953  | C | 5.1219  | -1.021  | 0.2434  |
| C | -5.8715 | -0.3013 | 0.1967  | C | 4.5835  | -1.4505 | 1.6257  |
| C | -6.9988 | -1.1091 | -0.5057 | C | 5.248   | -2.7587 | 2.1375  |
| C | -3.4933 | -0.344  | 1.1406  | C | 4.2935  | 0.07    | -0.4263 |
| C | -3.073  | 0.8423  | 0.2409  | C | 2.7983  | -0.2873 | -0.4973 |
| C | -4.2884 | 1.7076  | -0.1419 | C | 2.2498  | -0.611  | 0.8985  |
| C | -5.4402 | 0.875   | -0.7147 | C | 3.0577  | -1.7292 | 1.5521  |
| C | -1.9905 | 1.7199  | 0.8304  | C | 2.005   | 0.8225  | -1.1351 |
| C | -1.5018 | 1.6982  | 2.0693  | C | 1.321   | 0.7369  | -2.2739 |
| O | -1.4336 | 2.647   | -0.0529 | O | 1.9643  | 2.0305  | -0.4475 |
| C | -6.4948 | 0.2442  | 1.5051  | C | 4.8625  | -0.3241 | 2.6492  |
| C | -3.3564 | -3.3126 | 0.4599  | C | 6.8039  | -1.211  | -1.6168 |
| O | -3.1769 | -4.411  | -0.0572 | O | 7.7465  | -1.8097 | -2.1246 |



|   |         |         |         |   |         |         |         |
|---|---------|---------|---------|---|---------|---------|---------|
| O | 4.0758  | -3.5774 | -0.1846 | O | -4.866  | -2.8213 | 0.8422  |
| C | -6.4621 | -2.1497 | -1.4731 | C | 6.7502  | -2.7702 | 1.9107  |
| H | -1.8283 | 5.2819  | -1.1248 | H | 3.0008  | 4.6547  | 0.1086  |
| H | -1.4015 | 6.714   | -0.2136 | H | 2.6357  | 6.0177  | -0.9254 |
| H | -0.5686 | 5.4284  | 1.6461  | H | 1.2878  | 4.6903  | -2.4086 |
| H | -2.1567 | 4.8116  | 1.2139  | H | 2.8004  | 3.8354  | -2.141  |
| H | 0.9664  | 6.3089  | -0.4492 | H | 0.3284  | 6.0925  | -0.2252 |
| H | 0.2309  | 6.238   | -2.0378 | H | 1.3368  | 6.0657  | 1.2073  |
| H | 1.6236  | 1.6579  | 0.9032  | H | -1.3592 | 1.5459  | -0.7712 |
| H | 0.9892  | 1.4879  | -0.7244 | H | -0.4368 | 1.4206  | 0.7183  |
| H | 3.6208  | 2.8025  | 0.146   | H | -2.9306 | 3.1262  | 0.1913  |
| H | 4.1372  | 3.2935  | -2.1706 | H | -2.8736 | 3.9005  | 2.4779  |
| H | 2.666   | 2.5267  | -2.741  | H | -1.4438 | 2.9566  | 2.8497  |
| H | 2.3858  | 4.943   | -2.7619 | H | -0.8145 | 5.283   | 2.4773  |
| H | 2.9332  | 5.0861  | -1.1064 | H | -1.6548 | 5.3287  | 0.9426  |
| H | -0.9828 | 3.5664  | -2.222  | H | 2.126   | 3.2819  | 1.5773  |
| H | 0.2251  | 4.1055  | -3.3669 | H | 1.2306  | 4.1156  | 2.825   |
| H | 0.4056  | 2.5478  | -2.5685 | H | 0.691   | 2.5368  | 2.2625  |
| H | 1.6977  | 3.9008  | 1.8698  | H | -1.1971 | 3.6436  | -2.0283 |
| H | 4.6324  | 0.829   | -2.7048 | H | -2.9237 | 1.1452  | 3.4586  |
| H | 4.4804  | -0.7204 | 2.9527  | H | -6.0488 | 0.6004  | -1.4272 |
| H | 5.8155  | -1.8372 | 3.1328  | H | -7.5334 | -0.1387 | -0.8684 |
| H | 6.0751  | -2.099  | 0.752   | H | -6.5591 | -0.7908 | 1.235   |
| H | 5.987   | -0.3801 | 1.1083  | H | -6.1866 | 0.9041  | 0.9563  |
| H | 3.6108  | -2.903  | 3.6212  | H | -6.3439 | -1.5588 | -2.5375 |
| H | 4.5144  | -3.7137 | 2.3578  | H | -6.6219 | -2.3689 | -1.0089 |
| H | 1.5119  | -1.4635 | -0.6748 | H | -1.9654 | -1.4317 | -0.1423 |
| H | 2.5072  | -2.2834 | -1.8643 | H | -2.3493 | -2.22   | 1.3771  |
| H | 1.9056  | -4.4718 | -1.0782 | H | -2.9163 | -4.3032 | 0.3213  |
| H | 0.0054  | -3.2649 | 0.9749  | H | -2.1752 | -3.19   | -2.4153 |
| H | 0.2978  | -4.9589 | 0.6519  | H | -2.7214 | -4.8048 | -2.0252 |
| H | 2.5813  | -4.8283 | 1.4363  | H | -4.9133 | -4.0298 | -1.379  |
| H | 1.5254  | -4.1489 | 2.6551  | H | -4.5321 | -3.379  | -2.9578 |
| H | -1.7643 | -2.6389 | -2.4212 | H | 1.2234  | -3.7015 | -0.7273 |
| H | -0.8443 | -4.4795 | -3.4803 | H | 0.5539  | -5.3421 | 0.763   |
| H | 0.7144  | -5.2884 | -2.915  | H | -1.2138 | -5.6307 | 1.2035  |
| H | 2.3617  | -0.5895 | 2.3601  | H | -4.0019 | 0.1575  | -2.1029 |
| H | 1.0097  | -1.2831 | 1.4779  | H | -2.6681 | -0.9813 | -2.1927 |
| H | 1.375   | -1.8185 | 3.1146  | H | -3.9998 | -1.0789 | -3.3394 |
| H | -5.0949 | -3.7779 | -1.4791 | H | 6.8755  | -3.6049 | -0.0672 |
| H | -6.1745 | -3.7778 | -0.0831 | H | 8.1283  | -2.4257 | 0.3239  |
| H | -7.6819 | -0.4327 | -1.0348 | H | 4.8192  | -3.6288 | 1.6213  |
| H | -7.6113 | -1.6312 | 0.2427  | H | 5.0363  | -2.9037 | 3.2044  |
| H | -3.8251 | 0.0066  | 2.1249  | H | 4.4367  | 1.0036  | 0.1333  |
| H | -2.6045 | -0.948  | 1.335   | H | 4.629   | 0.2881  | -1.4422 |
| H | -2.6659 | 0.4172  | -0.6877 | H | 2.6989  | -1.1894 | -1.1179 |
| H | -4.6377 | 2.277   | 0.7284  | H | 2.2618  | 0.2781  | 1.5404  |

|             |                  |                  |                  |             |                  |                  |                  |
|-------------|------------------|------------------|------------------|-------------|------------------|------------------|------------------|
| H           | -3.9959          | 2.4538           | -0.8921          | H           | 1.1997           | -0.9207          | 0.8287           |
| H           | -6.2931          | 1.54             | -0.9016          | H           | 2.6603           | -1.9145          | 2.5583           |
| H           | -5.1292          | 0.4921           | -1.6957          | H           | 2.8797           | -2.6494          | 0.979            |
| H           | -1.7343          | 1.0847           | 2.9177           | H           | 1.1803           | -0.0857          | -2.9495          |
| H           | -7.4119          | 0.8068           | 1.2931           | H           | 4.5298           | -0.6147          | 3.6524           |
| H           | -6.7573          | -0.5749          | 2.1854           | H           | 5.9305           | -0.0879          | 2.7099           |
| H           | -5.8308          | 0.9165           | 2.055            | H           | 4.3463           | 0.6082           | 2.3992           |
| H           | -2.6551          | -2.9311          | 1.214            | H           | 6.3409           | -0.366           | -2.1406          |
| H           | 4.5349           | -3.3999          | -1.0323          | H           | -4.7345          | -2.7066          | 1.8071           |
| H           | -7.2934          | -2.6911          | -1.939           | H           | 7.2295           | -1.9563          | 2.4666           |
| H           | -5.9038          | -1.6668          | -2.284           | H           | 7.1793           | -3.7035          | 2.2933           |
| <b>4c-5</b> | <b>X axis(Å)</b> | <b>Y axis(Å)</b> | <b>Z axis(Å)</b> | <b>4c-6</b> | <b>X axis(Å)</b> | <b>Y axis(Å)</b> | <b>Z axis(Å)</b> |
| C           | 3.5944           | -4.0381          | -2.2938          | C           | 0.9664           | 5.5527           | 1.0663           |
| C           | 4.1777           | -3.747           | -0.9112          | C           | 0.8687           | 5.1622           | -0.4081          |
| C           | 3.3153           | -2.7783          | -0.0899          | C           | 0.3406           | 3.7312           | -0.6059          |
| C           | 1.8285           | -3.2419          | -0.0229          | C           | -1.0071          | 3.5154           | 0.145            |
| C           | 1.2313           | -3.439           | -1.4649          | C           | -0.8696          | 3.8494           | 1.6735           |
| C           | 2.119            | -4.4477          | -2.2432          | C           | -0.3356          | 5.2999           | 1.8315           |
| C           | 0.9254           | -2.3031          | 0.8047           | C           | -1.6209          | 2.1108           | -0.0418          |
| C           | -0.5359          | -2.7941          | 0.878            | C           | -3.0086          | 1.9742           | 0.6408           |
| C           | -1.1253          | -3.1338          | -0.5006          | C           | -2.9503          | 2.4058           | 2.1195           |
| C           | -0.2024          | -4.0239          | -1.3365          | C           | -2.2741          | 3.7632           | 2.3295           |
| C           | 1.1312           | -2.1329          | -2.299           | C           | 0.0742           | 2.8939           | 2.4502           |
| C           | 3.9064           | -2.6193          | 1.2918           | C           | 0.2098           | 3.4432           | -2.0835          |
| O           | 3.9713           | -3.4876          | 2.1511           | O           | -0.633           | 3.9099           | -2.8375          |
| O           | 1.7803           | -4.5372          | 0.6284           | O           | -1.9725          | 4.4575           | -0.3955          |
| C           | -1.3933          | -1.7668          | 1.5728           | C           | -3.5951          | 0.5846           | 0.4642           |
| O           | -1.4187          | -0.4986          | 1.0008           | O           | -3.1108          | -0.1576          | -0.6104          |
| C           | -2.1273          | -1.9646          | 2.6648           | C           | -4.514           | -0.0015          | 1.2309           |
| C           | -1.0323          | 2.5118           | 1.4849           | C           | -3.721           | -1.8462          | -3.1013          |
| C           | -1.4822          | 1.4356           | 2.4735           | C           | -4.5874          | -1.6338          | -1.858           |
| C           | -2.2968          | 0.3178           | 1.8042           | C           | -3.7548          | -1.4494          | -0.5814          |
| C           | -3.4868          | 0.8935           | 0.9812           | C           | -2.7387          | -2.6151          | -0.3941          |
| C           | -2.9828          | 1.927            | -0.0939          | C           | -1.786           | -2.7304          | -1.6418          |
| C           | -2.1784          | 3.0472           | 0.6214           | C           | -2.6532          | -2.9313          | -2.9153          |
| C           | -4.3699          | -0.1883          | 0.3196           | C           | -1.9207          | -2.5298          | 0.9154           |
| C           | -5.5566          | 0.4225           | -0.4606          | C           | -0.9435          | -3.7175          | 1.0709           |
| C           | -5.1268          | 1.5208           | -1.4475          | C           | -0.0449          | -3.9043          | -0.1619          |
| C           | -4.2138          | 2.5642           | -0.7962          | C           | -0.858           | -3.9638          | -1.4599          |
| C           | -6.4155          | -0.6355          | -1.1261          | C           | -0.1409          | -3.6542          | 2.356            |
| C           | -5.8407          | -1.5222          | -2.1763          | C           | 0.7525           | -2.4968          | 2.6326           |
| C           | -7.7087          | -0.8292          | -0.8169          | C           | -0.1878          | -4.6126          | 3.2964           |
| O           | -4.6687          | -1.4792          | -2.528           | O           | 0.8531           | -1.5342          | 1.8813           |
| C           | -2.0829          | 1.3102           | -1.1979          | C           | -0.8752          | -1.4942          | -1.8623          |
| C           | -2.7657          | -0.6708          | 2.8491           | C           | -4.6588          | -1.3131          | 0.6199           |
| O           | -3.595           | -0.4544          | 3.7222           | O           | -5.3868          | -2.1852          | 1.0742           |
| C           | 2.0122           | 4.9427           | -1.813           | C           | 5.6466           | -1.9055          | 1.3133           |

|   |         |         |         |   |         |         |         |
|---|---------|---------|---------|---|---------|---------|---------|
| C | 2.0225  | 3.4605  | -1.5138 | C | 4.3677  | -1.1233 | 1.1467  |
| C | 2.698   | 2.9071  | -0.4758 | C | 3.8216  | -0.8542 | -0.0637 |
| C | 3.5573  | 3.7707  | 0.4697  | C | 4.4201  | -1.4164 | -1.3689 |
| C | 3.8012  | 5.1981  | -0.0931 | C | 5.6609  | -2.3248 | -1.1383 |
| C | 2.6875  | 1.4277  | -0.1149 | C | 2.6284  | 0.0594  | -0.3007 |
| C | 4.1007  | 0.8286  | 0.0448  | C | 3.0241  | 1.2598  | -1.1848 |
| C | 4.9128  | 1.6486  | 1.058   | C | 3.6811  | 0.7859  | -2.496  |
| C | 4.955   | 3.1238  | 0.6629  | C | 4.8265  | -0.2048 | -2.2476 |
| C | 3.9925  | -0.6412 | 0.3867  | C | 1.8425  | 2.185   | -1.3814 |
| C | 4.3409  | -1.2505 | 1.5185  | C | 1.2277  | 2.5013  | -2.5197 |
| O | 3.4412  | -1.438  | -0.6162 | O | 1.3643  | 2.7887  | -0.217  |
| C | 2.8403  | 3.8969  | 1.835   | C | 3.3899  | -2.2958 | -2.1207 |
| C | 1.1915  | 2.6728  | -2.4799 | C | 3.7918  | -0.6409 | 2.4407  |
| O | 0.6335  | 3.1893  | -3.4426 | O | 4.2094  | -1.0236 | 3.5302  |
| O | -4.3488 | 1.627   | 1.8914  | O | -3.4839 | -3.8598 | -0.3234 |
| C | 2.5391  | 5.8099  | -0.6773 | C | 6.5002  | -1.8921 | 0.0511  |
| H | 3.7206  | -3.1599 | -2.9364 | H | 1.7923  | 5.0076  | 1.5365  |
| H | 4.1733  | -4.8411 | -2.7657 | H | 1.2254  | 6.6157  | 1.1401  |
| H | 4.2932  | -4.696  | -0.3719 | H | 0.2175  | 5.8796  | -0.9239 |
| H | 5.1882  | -3.3388 | -1.0415 | H | 1.8639  | 5.2681  | -0.8586 |
| H | 2.0505  | -5.4414 | -1.7817 | H | -1.0881 | 6.0168  | 1.4777  |
| H | 1.7465  | -4.5655 | -3.2687 | H | -0.1766 | 5.5302  | 2.8927  |
| H | 1.2988  | -2.2427 | 1.8356  | H | -1.7625 | 1.9259  | -1.1146 |
| H | 0.969   | -1.2848 | 0.4025  | H | -0.9379 | 1.3332  | 0.3196  |
| H | -0.548  | -3.7169 | 1.4749  | H | -3.6955 | 2.6575  | 0.1218  |
| H | -2.0878 | -3.6458 | -0.3707 | H | -3.966  | 2.4701  | 2.5299  |
| H | -1.3522 | -2.2183 | -1.0608 | H | -2.4311 | 1.6424  | 2.7124  |
| H | -0.6463 | -4.1626 | -2.3307 | H | -2.2018 | 3.9616  | 3.4067  |
| H | -0.1693 | -5.0229 | -0.8833 | H | -2.9309 | 4.5458  | 1.9281  |
| H | 2.1039  | -1.7267 | -2.5827 | H | 1.1215  | 2.9933  | 2.1584  |
| H | 0.5942  | -2.3195 | -3.2371 | H | 0.0356  | 3.1094  | 3.5251  |
| H | 0.594   | -1.3366 | -1.7771 | H | -0.1939 | 1.8412  | 2.3273  |
| H | 2.2994  | -4.4949 | 1.4586  | H | -1.9988 | 4.3491  | -1.37   |
| H | -2.2748 | -2.8419 | 3.2644  | H | -5.036  | 0.3446  | 2.1021  |
| H | -0.2392 | 2.1107  | 0.846   | H | -3.2477 | -0.8984 | -3.3809 |
| H | -0.5816 | 3.3433  | 2.0393  | H | -4.3656 | -2.1192 | -3.9454 |
| H | -2.0734 | 1.9089  | 3.2679  | H | -5.2643 | -2.4906 | -1.7471 |
| H | -0.5896 | 1.0184  | 2.9574  | H | -5.224  | -0.7558 | -2.0267 |
| H | -1.7697 | 3.7489  | -0.1171 | H | -2.0134 | -2.9581 | -3.8066 |
| H | -2.8466 | 3.6382  | 1.2612  | H | -3.1554 | -3.9066 | -2.8761 |
| H | -3.7588 | -0.8276 | -0.3239 | H | -1.3951 | -1.5723 | 0.9631  |
| H | -4.793  | -0.8441 | 1.0919  | H | -2.5983 | -2.5542 | 1.7789  |
| H | -6.1884 | 0.9249  | 0.2872  | H | -1.5658 | -4.623  | 1.1293  |
| H | -4.6211 | 1.0913  | -2.319  | H | 0.6967  | -3.1007 | -0.2303 |
| H | -6.0169 | 2.0291  | -1.8406 | H | 0.5283  | -4.8351 | -0.0633 |
| H | -4.803  | 3.1481  | -0.0774 | H | -1.4496 | -4.8884 | -1.463  |
| H | -3.8865 | 3.2789  | -1.5622 | H | -0.1676 | -4.049  | -2.309  |

|             |                  |                  |                  |             |                  |                  |                  |
|-------------|------------------|------------------|------------------|-------------|------------------|------------------|------------------|
| H           | -6.5416          | -2.2437          | -2.6297          | H           | 1.3285           | -2.5466          | 3.5728           |
| H           | -8.3216          | -1.5871          | -1.2955          | H           | 0.389            | -4.5642          | 4.2156           |
| H           | -8.1991          | -0.2205          | -0.0619          | H           | -0.8157          | -5.4904          | 3.1692           |
| H           | -1.1037          | 0.9966           | -0.8313          | H           | -1.4143          | -0.6174          | -2.2261          |
| H           | -2.5381          | 0.4396           | -1.6769          | H           | -0.3566          | -1.1939          | -0.9496          |
| H           | -1.8902          | 2.0459           | -1.988           | H           | -0.1092          | -1.709           | -2.6171          |
| H           | 2.6196           | 5.1169           | -2.7106          | H           | 6.2539           | -1.4867          | 2.1249           |
| H           | 0.9941           | 5.2799           | -2.0435          | H           | 5.3997           | -2.9374          | 1.5919           |
| H           | 4.5637           | 5.169            | -0.8837          | H           | 6.2869           | -2.3548          | -2.0391          |
| H           | 4.1999           | 5.8554           | 0.6899           | H           | 5.3413           | -3.3613          | -0.9605          |
| H           | 2.1276           | 1.3038           | 0.8215           | H           | 1.8211           | -0.5106          | -0.7705          |
| H           | 2.1454           | 0.8301           | -0.8494          | H           | 2.1982           | 0.4387           | 0.6271           |
| H           | 4.6157           | 0.8965           | -0.9243          | H           | 3.785            | 1.8396           | -0.641           |
| H           | 4.4934           | 1.5515           | 2.0664           | H           | 2.9375           | 0.3193           | -3.1529          |
| H           | 5.9403           | 1.2667           | 1.1092           | H           | 4.0772           | 1.6498           | -3.0448          |
| H           | 5.5232           | 3.6785           | 1.4207           | H           | 5.2041           | -0.5522          | -3.2178          |
| H           | 5.5301           | 3.2035           | -0.2701          | H           | 5.6539           | 0.3387           | -1.7724          |
| H           | 4.768            | -0.874           | 2.4279           | H           | 1.3922           | 2.1838           | -3.5311          |
| H           | 2.7045           | 2.9308           | 2.3307           | H           | 3.835            | -2.7273          | -3.0252          |
| H           | 3.4134           | 4.5312           | 2.5212           | H           | 3.0488           | -3.1254          | -1.4899          |
| H           | 1.8442           | 4.34             | 1.7293           | H           | 2.4988           | -1.7482          | -2.4381          |
| H           | 1.095            | 1.5952           | -2.3011          | H           | 2.9591           | 0.071            | 2.3884           |
| H           | -4.5722          | 1.0434           | 2.6465           | H           | -4.1898          | -3.7613          | 0.3496           |
| H           | 1.7715           | 5.9225           | 0.0968           | H           | 7.3508           | -2.5719          | 0.1752           |
| H           | 2.751            | 6.8173           | -1.0538          | H           | 6.9145           | -0.8908          | -0.1179          |
| <b>4c-7</b> | <b>X axis(Å)</b> | <b>Y axis(Å)</b> | <b>Z axis(Å)</b> | <b>4c-8</b> | <b>X axis(Å)</b> | <b>Y axis(Å)</b> | <b>Z axis(Å)</b> |
| C           | 2.6908           | 4.1474           | 2.2274           | C           | 2.1448           | 5.192            | -0.5388          |
| C           | 3.0738           | 4.1628           | 0.7476           | C           | 1.8327           | 4.219            | -1.6773          |
| C           | 2.2378           | 3.19             | -0.0968          | C           | 1.0753           | 2.9714           | -1.2012          |
| C           | 0.7101           | 3.4039           | 0.1209           | C           | -0.1945          | 3.3521           | -0.3833          |
| C           | 0.3367           | 3.2805           | 1.645            | C           | 0.1733           | 4.2678           | 0.8412           |
| C           | 1.1834           | 4.3002           | 2.4543           | C           | 0.9183           | 5.5268           | 0.3182           |
| C           | -0.1738          | 2.4633           | -0.7257          | C           | -1.0257          | 2.137            | 0.0817           |
| C           | -1.6826          | 2.7083           | -0.5057          | C           | -2.3048          | 2.5532           | 0.8405           |
| C           | -2.0742          | 2.7211           | 0.9804           | C           | -1.9948          | 3.5202           | 1.996            |
| C           | -1.1679          | 3.623            | 1.8211           | C           | -1.1394          | 4.7105           | 1.5469           |
| C           | 0.5672           | 1.8678           | 2.2483           | C           | 1.0677           | 3.5816           | 1.9084           |
| C           | 2.6199           | 3.3267           | -1.5541          | C           | 0.724            | 2.093            | -2.382           |
| O           | 2.4091           | 4.3001           | -2.2643          | O           | -0.0293          | 2.3913           | -3.2983          |
| O           | 0.3741           | 4.7558           | -0.2838          | O           | -1.064           | 4.1386           | -1.2387          |
| C           | -2.5052          | 1.6813           | -1.2421          | C           | -3.0694          | 1.3138           | 1.2464           |
| O           | -2.1579          | 0.3495           | -1.0388          | O           | -3.6459          | 0.6127           | 0.1877           |
| C           | -3.5379          | 1.933            | -2.0428          | C           | -3.2557          | 0.8216           | 2.4695           |
| C           | -1.422           | -2.3015          | -2.435           | C           | -6.3663          | -0.3676          | -0.8731          |
| C           | -2.3126          | -1.1667          | -2.9402          | C           | -5.9032          | -0.2144          | 0.5751           |
| C           | -3.0737          | -0.456           | -1.8099          | C           | -4.3991          | -0.4824          | 0.7493           |
| C           | -3.8535          | -1.4678          | -0.9202          | C           | -3.9914          | -1.8602          | 0.1488           |

|   |         |         |         |   |         |         |         |
|---|---------|---------|---------|---|---------|---------|---------|
| C | -2.8893 | -2.567  | -0.3356 | C | -4.4041 | -1.9631 | -1.3671 |
| C | -2.1606 | -3.274  | -1.5111 | C | -5.929  | -1.6959 | -1.4967 |
| C | -4.6652 | -0.8031 | 0.2143  | C | -2.4945 | -2.2117 | 0.3239  |
| C | -5.4499 | -1.8362 | 1.0547  | C | -2.1655 | -3.6151 | -0.2388 |
| C | -4.5739 | -2.9974 | 1.5546  | C | -2.6431 | -3.8057 | -1.6886 |
| C | -3.7342 | -3.6194 | 0.4348  | C | -4.1079 | -3.4013 | -1.8764 |
| C | -6.231  | -1.186  | 2.1805  | C | -0.7066 | -3.9896 | -0.0669 |
| C | -5.5195 | -0.4601 | 3.2699  | C | 0.3576  | -3.2433 | -0.7904 |
| C | -7.5717 | -1.2245 | 2.2587  | C | -0.2992 | -5.001  | 0.7183  |
| O | -4.3028 | -0.3275 | 3.3093  | O | 0.1459  | -2.2442 | -1.4665 |
| C | -1.8154 | -2.0203 | 0.6439  | C | -3.654  | -0.9724 | -2.297  |
| C | -3.9858 | 0.5965  | -2.4008 | C | -4.0385 | -0.3766 | 2.2129  |
| O | -4.9921 | 0.3847  | -3.0637 | O | -4.3265 | -1.1844 | 3.0858  |
| C | 6.4415  | -3.9094 | 0.5007  | C | 6.6721  | -2.8908 | 0.4249  |
| C | 6.1239  | -2.4369 | 0.3755  | C | 6.0797  | -1.674  | -0.2445 |
| C | 4.8635  | -1.9417 | 0.3023  | C | 5.106   | -0.9198 | 0.321   |
| C | 3.6341  | -2.8774 | 0.3201  | C | 4.6079  | -1.1821 | 1.759   |
| C | 4.0218  | -4.3665 | 0.1033  | C | 5.3777  | -2.3277 | 2.4742  |
| C | 4.5087  | -0.4619 | 0.2099  | C | 4.3266  | 0.1789  | -0.3891 |
| C | 3.551   | -0.1539 | -0.9554 | C | 2.8302  | -0.1879 | -0.4569 |
| C | 2.291   | -1.0241 | -0.8758 | C | 2.2594  | -0.5077 | 0.9363  |
| C | 2.6521  | -2.5054 | -0.8227 | C | 3.1034  | -1.5511 | 1.6758  |
| C | 3.1605  | 1.3009  | -0.9898 | C | 2.0328  | 0.903   | -1.1204 |
| C | 3.2333  | 2.104   | -2.0484 | C | 1.3615  | 0.7919  | -2.2646 |
| O | 2.6359  | 1.8297  | 0.1843  | O | 1.9705  | 2.1205  | -0.4514 |
| C | 2.9195  | -2.7489 | 1.6866  | C | 4.7965  | 0.0722  | 2.6478  |
| C | 7.3503  | -1.5783 | 0.3687  | C | 6.6398  | -1.4096 | -1.6064 |
| O | 8.4833  | -2.0446 | 0.31    | O | 7.4432  | -2.1602 | -2.1496 |
| O | -4.8131 | -2.1616 | -1.7606 | O | -4.7372 | -2.8913 | 0.8508  |
| C | 5.249   | -4.7664 | 0.9048  | C | 5.7808  | -3.4459 | 1.5291  |
| H | 3.0498  | 3.2205  | 2.6881  | H | 2.9397  | 4.775   | 0.0894  |
| H | 3.2152  | 4.9612  | 2.7424  | H | 2.551   | 6.1191  | -0.9605 |
| H | 2.9595  | 5.1853  | 0.3651  | H | 1.2481  | 4.7462  | -2.4421 |
| H | 4.1405  | 3.9178  | 0.6648  | H | 2.7782  | 3.93    | -2.1538 |
| H | 0.8944  | 5.3246  | 2.1854  | H | 0.2363  | 6.1445  | -0.2805 |
| H | 0.9724  | 4.1994  | 3.5266  | H | 1.2329  | 6.1562  | 1.1604  |
| H | 0.0285  | 2.6231  | -1.7931 | H | -1.3361 | 1.5533  | -0.7949 |
| H | 0.0822  | 1.4186  | -0.5172 | H | -0.4217 | 1.4646  | 0.7021  |
| H | -1.9217 | 3.6995  | -0.9162 | H | -2.9547 | 3.0994  | 0.1417  |
| H | -3.1104 | 3.0689  | 1.0838  | H | -2.9334 | 3.9006  | 2.4189  |
| H | -2.0618 | 1.7037  | 1.3908  | H | -1.4836 | 2.9971  | 2.8123  |
| H | -1.4569 | 3.5345  | 2.8762  | H | -0.9089 | 5.3337  | 2.4205  |
| H | -1.3572 | 4.6688  | 1.5471  | H | -1.7379 | 5.3433  | 0.8791  |
| H | 1.6224  | 1.6017  | 2.3344  | H | 2.0862  | 3.3943  | 1.5628  |
| H | 0.158   | 1.8154  | 3.2647  | H | 1.1627  | 4.2202  | 2.7952  |
| H | 0.0854  | 1.0758  | 1.6688  | H | 0.6639  | 2.6236  | 2.2459  |
| H | 0.7421  | 4.9177  | -1.1777 | H | -1.2147 | 3.6438  | -2.0717 |

|             |                  |                  |                  |              |                  |                  |                  |
|-------------|------------------|------------------|------------------|--------------|------------------|------------------|------------------|
| H           | -3.9951          | 2.8597           | -2.3312          | H            | -2.9187          | 1.1569           | 3.431            |
| H           | -0.554           | -1.8802          | -1.9183          | H            | -5.9902          | 0.4713           | -1.469           |
| H           | -1.0219          | -2.8544          | -3.2932          | H            | -7.4599          | -0.2967          | -0.91            |
| H           | -3.0216          | -1.5738          | -3.6725          | H            | -6.4833          | -0.8991          | 1.2072           |
| H           | -1.6825          | -0.4506          | -3.4833          | H            | -6.1514          | 0.8011           | 0.9098           |
| H           | -1.4447          | -4.0101          | -1.1234          | H            | -6.226           | -1.7086          | -2.5532          |
| H           | -2.8819          | -3.8428          | -2.1121          | H            | -6.4933          | -2.5056          | -1.0158          |
| H           | -4.0044          | -0.2007          | 0.8444           | H            | -1.8662          | -1.4426          | -0.1361          |
| H           | -5.3991          | -0.1081          | -0.2145          | H            | -2.2391          | -2.22            | 1.3916           |
| H           | -6.1854          | -2.2901          | 0.3736           | H            | -2.748           | -4.3306          | 0.3609           |
| H           | -3.9111          | -2.672           | 2.3635           | H            | -2.0204          | -3.2367          | -2.3871          |
| H           | -5.2127          | -3.7771          | 1.9896           | H            | -2.5293          | -4.8587          | -1.9773          |
| H           | -4.4041          | -4.1493          | -0.2547          | H            | -4.7428          | -4.1286          | -1.3541          |
| H           | -3.0811          | -4.3895          | 0.8651           | H            | -4.3682          | -3.4891          | -2.9391          |
| H           | -6.1614          | -0.0329          | 4.059            | H            | 1.3815           | -3.6374          | -0.673           |
| H           | -8.1285          | -0.7579          | 3.0658           | H            | 0.7454           | -5.273           | 0.8372           |
| H           | -8.1604          | -1.7356          | 1.5014           | H            | -1.0166          | -5.5986          | 1.275            |
| H           | -1.0599          | -1.4017          | 0.1557           | H            | -3.9282          | 0.0703           | -2.1261          |
| H           | -2.2456          | -1.4213          | 1.4505           | H            | -2.5676          | -1.0377          | -2.1961          |
| H           | -1.2701          | -2.8479          | 1.1142           | H            | -3.8909          | -1.1805          | -3.3476          |
| H           | 6.8298           | -4.2617          | -0.4637          | H            | 6.8316           | -3.6962          | -0.3019          |
| H           | 7.2329           | -4.0695          | 1.2432           | H            | 7.6547           | -2.6253          | 0.8345           |
| H           | 4.2337           | -4.5523          | -0.9587          | H            | 4.7767           | -2.7386          | 3.2952           |
| H           | 3.1822           | -5.0227          | 0.3649           | H            | 6.2931           | -1.9346          | 2.9383           |
| H           | 4.0603           | -0.1597          | 1.1651           | H            | 4.4786           | 1.1319           | 0.1311           |
| H           | 5.3871           | 0.1751           | 0.0877           | H            | 4.6749           | 0.3546           | -1.4092          |
| H           | 4.0724           | -0.3981          | -1.8924          | H            | 2.7434           | -1.1002          | -1.0648          |
| H           | 1.6835           | -0.7563          | -0.0027          | H            | 2.1904           | 0.4018           | 1.5451           |
| H           | 1.6598           | -0.8433          | -1.7551          | H            | 1.2321           | -0.8808          | 0.8427           |
| H           | 1.7297           | -3.0938          | -0.7328          | H            | 2.6906           | -1.685           | 2.6838           |
| H           | 3.0946           | -2.776           | -1.7914          | H            | 2.9834           | -2.515           | 1.1643           |
| H           | 3.5717           | 1.9219           | -3.0502          | H            | 1.2376           | -0.0427          | -2.9287          |
| H           | 2.0622           | -3.4295          | 1.7463           | H            | 4.4828           | -0.1318          | 3.6785           |
| H           | 3.591            | -2.9882          | 2.5184           | H            | 5.8492           | 0.3783           | 2.6751           |
| H           | 2.5382           | -1.7391          | 1.8684           | H            | 4.2207           | 0.9372           | 2.3073           |
| H           | 7.2033           | -0.4926          | 0.4201           | H            | 6.3157           | -0.4901          | -2.1102          |
| H           | -5.3382          | -1.4938          | -2.2498          | H            | -4.6137          | -2.7616          | 1.8148           |
| H           | 5.0576           | -4.6626          | 1.979            | H            | 6.3205           | -4.2246          | 2.0801           |
| H           | 5.4817           | -5.8233          | 0.7305           | H            | 4.8921           | -3.921           | 1.0968           |
| <b>4c-9</b> | <b>X axis(Å)</b> | <b>Y axis(Å)</b> | <b>Z axis(Å)</b> | <b>4c-10</b> | <b>X axis(Å)</b> | <b>Y axis(Å)</b> | <b>Z axis(Å)</b> |
| C           | 2.0172           | 5.7582           | 0.076            | C            | -3.7691          | -4.0215          | 2.2957           |
| C           | 1.8688           | 4.864            | -1.1552          | C            | -4.2728          | -3.7697          | 0.8746           |
| C           | 1.2301           | 3.5041           | -0.8277          | C            | -3.3716          | -2.8131          | 0.0811           |
| C           | -0.1156          | 3.6767           | -0.0651          | C            | -1.8799          | -3.2643          | 0.1125           |
| C           | 0.081            | 4.5236           | 1.2463           | C            | -1.3663          | -3.4205          | 1.5916           |
| C           | 0.7168           | 5.8917           | 0.8745           | C            | -2.2901          | -4.4181          | 2.3417           |
| C           | -0.8427          | 2.3482           | 0.2517           | C            | -0.9367          | -2.3379          | -0.6837          |

|   |         |         |         |   |         |         |         |
|---|---------|---------|---------|---|---------|---------|---------|
| C | -2.2087 | 2.5895  | 0.9351  | C | 0.5303  | -2.8176 | -0.6595 |
| C | -2.0692 | 3.4801  | 2.1829  | C | 1.0407  | -3.1174 | 0.7589  |
| C | -1.3085 | 4.7774  | 1.8936  | C | 0.0772  | -3.9951 | 1.5617  |
| C | 0.9777  | 3.844   | 2.3149  | C | -1.3252 | -2.0938 | 2.3976  |
| C | 1.0519  | 2.7091  | -2.1015 | C | -3.8835 | -2.6912 | -1.3355 |
| O | 0.2556  | 2.9537  | -2.9972 | O | -3.8907 | -3.5796 | -2.1762 |
| O | -1.0128 | 4.4403  | -0.9144 | O | -1.7828 | -4.5746 | -0.5012 |
| C | -2.9314 | 1.2841  | 1.1861  | C | 1.416   | -1.8    | -1.3324 |
| O | -3.2918 | 0.5781  | 0.0369  | O | 1.4188  | -0.5221 | -0.7805 |
| C | -3.3062 | 0.7627  | 2.3531  | C | 2.1862  | -2.0132 | -2.3962 |
| C | -5.86   | -0.1865 | -1.4612 | C | 0.9923  | 2.4721  | -1.3636 |
| C | -5.6279 | -0.0985 | 0.0471  | C | 1.4845  | 1.3741  | -2.3062 |
| C | -4.19   | -0.4768 | 0.4455  | C | 2.3028  | 0.2898  | -1.5856 |
| C | -3.7997 | -1.8736 | -0.1188 | C | 3.4571  | 0.9083  | -0.7451 |
| C | -3.9676 | -1.9233 | -1.683  | C | 2.9079  | 1.9675  | 0.2806  |
| C | -5.4261 | -1.532  | -2.0495 | C | 2.1077  | 3.053   | -0.4901 |
| C | -2.3881 | -2.3562 | 0.2895  | C | 4.3365  | -0.1362 | -0.0195 |
| C | -2.1015 | -3.7815 | -0.2402 | C | 5.5135  | 0.5155  | 0.7463  |
| C | -2.3329 | -3.9066 | -1.7556 | C | 5.0212  | 1.6277  | 1.6946  |
| C | -3.706  | -3.3743 | -2.1766 | C | 4.1134  | 2.6425  | 0.9921  |
| C | -0.7417 | -4.3008 | 0.1766  | C | 6.3654  | -0.5499 | 1.4201  |
| C | 0.5012  | -3.6789 | -0.3494 | C | 7.2987  | -1.3222 | 0.5461  |
| C | -0.578  | -5.3325 | 1.0215  | C | 6.3983  | -0.8544 | 2.7281  |
| O | 0.5165  | -2.6338 | -0.9888 | O | 7.3613  | -1.1634 | -0.6667 |
| C | -3.0013 | -0.9846 | -2.4527 | C | 1.9855  | 1.3733  | 1.3788  |
| C | -4.0513 | -0.4189 | 1.9488  | C | 2.81    | -0.7147 | -2.598  |
| O | -4.4934 | -1.2348 | 2.7461  | O | 3.6396  | -0.5056 | -3.4713 |
| C | 4.9572  | -3.5387 | 1.7549  | C | -2.1876 | 4.9435  | 1.6751  |
| C | 3.9395  | -2.532  | 1.2738  | C | -2.1769 | 3.4567  | 1.4008  |
| C | 4.1513  | -1.6771 | 0.2445  | C | -2.8111 | 2.8811  | 0.349   |
| C | 5.5121  | -1.6095 | -0.4767 | C | -3.6462 | 3.7205  | -0.6392 |
| C | 6.6224  | -2.3628 | 0.3071  | C | -3.9246 | 5.1525  | -0.105  |
| C | 3.1046  | -0.7362 | -0.3365 | C | -2.7718 | 1.3977  | 0.0092  |
| C | 3.6038  | 0.7156  | -0.3915 | C | -4.173  | 0.7815  | -0.1815 |
| C | 4.9151  | 0.8109  | -1.1824 | C | -4.9576 | 1.5719  | -1.2386 |
| C | 5.9729  | -0.1313 | -0.6049 | C | -5.0292 | 3.0541  | -0.8726 |
| C | 2.5574  | 1.65    | -0.9439 | C | -4.0369 | -0.6942 | -0.483  |
| C | 1.9519  | 1.5681  | -2.1276 | C | -4.3168 | -1.3321 | -1.6179 |
| O | 2.1791  | 2.6915  | -0.1019 | O | -3.5365 | -1.4623 | 0.5677  |
| C | 5.3836  | -2.244  | -1.8816 | C | -2.8834 | 3.8357  | -1.9804 |
| C | 2.6533  | -2.5777 | 2.034   | C | -1.3762 | 2.6891  | 2.4075  |
| O | 2.3326  | -3.5344 | 2.7313  | O | -0.8223 | 3.2255  | 3.3616  |
| O | -4.7346 | -2.8452 | 0.4261  | O | 4.3283  | 1.6303  | -1.6517 |
| C | 6.1483  | -3.7137 | 0.82    | C | -2.6887 | 5.7875  | 0.5104  |
| H | 2.815   | 5.368   | 0.7175  | H | -3.9399 | -3.1291 | 2.9078  |
| H | 2.347   | 6.7547  | -0.2416 | H | -4.3682 | -4.8182 | 2.7528  |
| H | 1.2673  | 5.3919  | -1.9064 | H | -4.3488 | -4.7326 | 0.3531  |

|   |         |         |         |   |         |         |         |
|---|---------|---------|---------|---|---------|---------|---------|
| H | 2.8625  | 4.7215  | -1.5988 | H | -5.2924 | -3.368  | 0.9356  |
| H | 0.008   | 6.4862  | 0.2833  | H | -2.1867 | -5.4222 | 1.9101  |
| H | 0.9142  | 6.4754  | 1.7828  | H | -1.9774 | -4.5072 | 3.3899  |
| H | -1.029  | 1.8047  | -0.6837 | H | -1.2498 | -2.3059 | -1.7358 |
| H | -0.217  | 1.6939  | 0.8695  | H | -1.0107 | -1.3104 | -0.3103 |
| H | -2.8439 | 3.1434  | 0.2285  | H | 0.5835  | -3.7553 | -1.2304 |
| H | -3.0648 | 3.7387  | 2.5659  | H | 2.013   | -3.6236 | 0.6981  |
| H | -1.5638 | 2.9349  | 2.9888  | H | 1.2272  | -2.1863 | 1.3082  |
| H | -1.1947 | 5.3405  | 2.8288  | H | 0.463   | -4.1053 | 2.5833  |
| H | -1.9247 | 5.4079  | 1.2398  | H | 0.0784  | -5.0052 | 1.1326  |
| H | 2.027   | 3.7814  | 2.0201  | H | -2.3159 | -1.6902 | 2.6149  |
| H | 0.9599  | 4.4176  | 3.2498  | H | -0.8419 | -2.2525 | 3.3694  |
| H | 0.6521  | 2.829   | 2.5566  | H | -0.7652 | -1.3052 | 1.888   |
| H | -1.0758 | 3.99    | -1.7836 | H | -2.2508 | -4.558  | -1.3623 |
| H | -3.1691 | 1.1005  | 3.362   | H | 2.3535  | -2.8972 | -2.9808 |
| H | -5.3309 | 0.632   | -1.9618 | H | 0.19    | 2.0773  | -0.7325 |
| H | -6.9249 | -0.0299 | -1.6706 | H | 0.542   | 3.2783  | -1.9546 |
| H | -6.346  | -0.7532 | 0.5575  | H | 2.0867  | 1.834   | -3.1003 |
| H | -5.8591 | 0.9245  | 0.3706  | H | 0.6112  | 0.927   | -2.7985 |
| H | -5.5456 | -1.4998 | -3.14   | H | 1.6704  | 3.7717  | 0.2149  |
| H | -6.1212 | -2.3037 | -1.6935 | H | 2.7836  | 3.6332  | -1.1316 |
| H | -1.6289 | -1.6443 | -0.0491 | H | 3.7347  | -0.7477 | 0.6629  |
| H | -2.3102 | -2.3929 | 1.3838  | H | 4.7553  | -0.828  | -0.7605 |
| H | -2.8459 | -4.4422 | 0.2287  | H | 6.1602  | 1.0182  | 0.0127  |
| H | -1.5542 | -3.3801 | -2.3178 | H | 4.4783  | 1.2028  | 2.5459  |
| H | -2.2575 | -4.9603 | -2.0538 | H | 5.884   | 2.1589  | 2.1164  |
| H | -4.4779 | -4.0522 | -1.7898 | H | 4.7129  | 3.2143  | 0.2722  |
| H | -3.7877 | -3.4242 | -3.27   | H | 3.7574  | 3.3729  | 1.73    |
| H | 1.4378  | -4.2133 | -0.1159 | H | 7.9373  | -2.0623 | 1.0575  |
| H | 0.4007  | -5.6907 | 1.3305  | H | 7.0503  | -1.6238 | 3.1323  |
| H | -1.4335 | -5.8441 | 1.4539  | H | 5.7697  | -0.3476 | 3.4527  |
| H | -3.2185 | 0.0744  | -2.3008 | H | 1.0232  | 1.03    | 0.9943  |
| H | -1.9545 | -1.1397 | -2.1791 | H | 2.4384  | 0.5271  | 1.9017  |
| H | -3.0789 | -1.1584 | -3.533  | H | 1.7576  | 2.1325  | 2.1366  |
| H | 5.3188  | -3.2158 | 2.7397  | H | -2.8225 | 5.1269  | 2.5516  |
| H | 4.4923  | -4.5225 | 1.8916  | H | -1.1796 | 5.2934  | 1.9298  |
| H | 6.9499  | -1.7659 | 1.1694  | H | -4.7117 | 5.1253  | 0.6611  |
| H | 7.5101  | -2.4999 | -0.3231 | H | -4.3052 | 5.794   | -0.9098 |
| H | 2.8514  | -1.0886 | -1.3445 | H | -2.1848 | 1.2683  | -0.9098 |
| H | 2.1622  | -0.7562 | 0.2148  | H | -2.2418 | 0.816   | 0.7647  |
| H | 3.8159  | 1.029   | 0.6415  | H | -4.7205 | 0.8665  | 0.7684  |
| H | 4.7499  | 0.578   | -2.2413 | H | -4.5015 | 1.4606  | -2.2294 |
| H | 5.2977  | 1.8391  | -1.1492 | H | -5.9783 | 1.1771  | -1.3186 |
| H | 6.8783  | -0.0723 | -1.2226 | H | -5.5745 | 3.589   | -1.6609 |
| H | 6.2532  | 0.2525  | 0.386   | H | -5.6394 | 3.1442  | 0.0369  |
| H | 2.0535  | 0.8582  | -2.9261 | H | -4.6942 | -0.9799 | -2.5587 |
| H | 6.3534  | -2.2653 | -2.392  | H | -1.8946 | 4.2874  | -1.8461 |



|              |                  |                  |                  |              |                  |                  |                  |
|--------------|------------------|------------------|------------------|--------------|------------------|------------------|------------------|
| H            | 5.0139           | -3.2739          | -1.8287          | H            | -2.724           | 2.8646           | -2.4593          |
| H            | 4.6952           | -1.6936          | -2.5303          | H            | -3.437           | 4.4572           | -2.6937          |
| H            | 1.9882           | -1.7086          | 1.9412           | H            | -1.2983          | 1.6044           | 2.2683           |
| H            | -4.7302          | -2.7607          | 1.4033           | H            | 4.6714           | 1.002            | -2.3222          |
| H            | 5.8754           | -4.3672          | -0.0164          | H            | -1.8982          | 5.8984           | -0.2405          |
| H            | 6.9619           | -4.2175          | 1.3547           | H            | -2.9242          | 6.7977           | 0.865            |
| <b>4c-11</b> | <b>X axis(Å)</b> | <b>Y axis(Å)</b> | <b>Z axis(Å)</b> | <b>4c-12</b> | <b>X axis(Å)</b> | <b>Y axis(Å)</b> | <b>Z axis(Å)</b> |
| C            | 2.7546           | 5.04             | -1.0531          | C            | 2.2613           | 5.367            | -0.3754          |
| C            | 2.1572           | 4.1366           | -2.1342          | C            | 1.8705           | 4.5098           | -1.5795          |
| C            | 1.4376           | 2.9118           | -1.5502          | C            | 1.1784           | 3.1968           | -1.1719          |
| C            | 0.3816           | 3.3309           | -0.4863          | C            | -0.0333          | 3.4672           | -0.2347          |
| C            | 1.0455           | 4.1673           | 0.6701           | C            | 0.4067           | 4.2741           | 1.0427           |
| C            | 1.7525           | 5.4037           | 0.0491           | C            | 1.099            | 5.5917           | 0.5963           |
| C            | -0.4295          | 2.1519           | 0.0937           | C            | -0.8246          | 2.2019           | 0.17             |
| C            | -1.5005          | 2.6247           | 1.1007           | C            | -2.0657          | 2.5534           | 1.0254           |
| C            | -0.8956          | 3.497            | 2.212            | C            | -1.6834          | 3.4001           | 2.2521           |
| C            | -0.0654          | 4.6538           | 1.6434           | C            | -0.8568          | 4.6324           | 1.8733           |
| C            | 2.0869           | 3.3818           | 1.5121           | C            | 1.3782           | 3.5049           | 1.977            |
| C            | 0.8153           | 2.094            | -2.6582          | C            | 0.7761           | 2.4328           | -2.4123          |
| O            | -0.1055          | 2.4504           | -3.38            | O            | -0.1406          | 2.7209           | -3.1692          |
| O            | -0.5802          | 4.207            | -1.1296          | O            | -0.9667          | 4.3164           | -0.9545          |
| C            | -2.2886          | 1.4357           | 1.5942           | C            | -2.8681          | 1.3143           | 1.3534           |
| O            | -3.2621          | 0.9791           | 0.7081           | O            | -3.4214          | 0.6655           | 0.2497           |
| C            | -2.1724          | 0.7894           | 2.7524           | C            | -3.1433          | 0.804            | 2.5524           |
| C            | -6.3021          | 0.5347           | 0.4947           | C            | -6.1427          | -0.0528          | -0.9845          |
| C            | -5.3994          | 0.3944           | 1.7199           | C            | -5.7583          | 0.0337           | 0.4929           |
| C            | -3.9822          | -0.0851          | 1.3636           | C            | -4.2964          | -0.3692          | 0.7475           |
| C            | -4.0182          | -1.3885          | 0.5137           | C            | -3.9831          | -1.7692          | 0.1451           |
| C            | -4.8805          | -1.1885          | -0.7893          | C            | -4.301           | -1.8095          | -1.3957          |
| C            | -6.305           | -0.7178          | -0.3863          | C            | -5.7844          | -1.4024          | -1.6148          |
| C            | -2.6215          | -1.9511          | 0.1565           | C            | -2.5437          | -2.263           | 0.4139           |
| C            | -2.7231          | -3.2701          | -0.6456          | C            | -2.3109          | -3.6826          | -0.1531          |
| C            | -3.6344          | -3.1503          | -1.8784          | C            | -2.6929          | -3.8002          | -1.6378          |
| C            | -4.9985          | -2.5473          | -1.5333          | C            | -4.0992          | -3.2602          | -1.9172          |
| C            | -1.3736          | -3.8574          | -1.0065          | C            | -0.9121          | -4.1938          | 0.1237           |
| C            | -0.4477          | -3.1306          | -1.9161          | C            | 0.272            | -3.5064          | -0.457           |
| C            | -0.9533          | -5.0519          | -0.5566          | C            | -0.665           | -5.269           | 0.8909           |
| O            | -0.6124          | -1.9711          | -2.2733          | O            | 0.2005           | -2.4982          | -1.1488          |
| C            | -4.2908          | -0.1585          | -1.7899          | C            | -3.4061          | -0.8759          | -2.2536          |
| C            | -3.1783          | -0.2548          | 2.6318           | C            | -4.005           | -0.3219          | 2.2292           |
| O            | -3.3128          | -1.1502          | 3.4547           | O            | -4.4087          | -1.116           | 3.068            |
| C            | 5.7978           | -2.6022          | 2.2328           | C            | 5.8796           | -2.5242          | 2.0988           |
| C            | 4.8075           | -1.5701          | 1.742            | C            | 4.7504           | -1.6077          | 1.685            |
| C            | 4.083            | -1.7044          | 0.6033           | C            | 4.3318           | -1.4594          | 0.4033           |
| C            | 4.2595           | -2.9299          | -0.3173          | C            | 5.0248           | -2.2083          | -0.7563          |
| C            | 5.5273           | -3.7556          | 0.036            | C            | 6.3866           | -2.8208          | -0.327           |
| C            | 3.0434           | -0.7084          | 0.1026           | C            | 3.1691           | -0.5785          | -0.0406          |

|   |         |         |         |   |         |         |         |
|---|---------|---------|---------|---|---------|---------|---------|
| C | 3.3189  | -0.2551 | -1.3446 | C | 3.5596  | 0.3885  | -1.1715 |
| C | 3.3658  | -1.4777 | -2.2715 | C | 4.1274  | -0.3921 | -2.3649 |
| C | 4.4184  | -2.4797 | -1.7958 | C | 5.3236  | -1.2393 | -1.9322 |
| C | 2.3373  | 0.8157  | -1.7619 | C | 2.4063  | 1.2999  | -1.5193 |
| C | 1.4371  | 0.7808  | -2.7431 | C | 1.6385  | 1.2779  | -2.6076 |
| O | 2.4157  | 1.9921  | -1.0189 | O | 2.1552  | 2.3072  | -0.5875 |
| C | 3.0226  | -3.8467 | -0.1773 | C | 4.105   | -3.3509 | -1.2461 |
| C | 4.7057  | -0.3869 | 2.6554  | C | 4.1332  | -0.89   | 2.8461  |
| O | 5.3841  | -0.2757 | 3.6714  | O | 4.5325  | -1.0302 | 3.9976  |
| O | -4.6825 | -2.416  | 1.2975  | O | -4.8683 | -2.7345 | 0.7756  |
| C | 5.6888  | -3.9513 | 1.5342  | C | 6.3058  | -3.5142 | 1.0226  |
| H | 3.6327  | 4.5524  | -0.6154 | H | 3.1044  | 4.9014  | 0.147   |
| H | 3.1242  | 5.9611  | -1.5194 | H | 2.626   | 6.3386  | -0.7294 |
| H | 1.4629  | 4.7267  | -2.7459 | H | 1.2131  | 5.0952  | -2.2352 |
| H | 2.9666  | 3.8186  | -2.8038 | H | 2.7779  | 4.2998  | -2.1603 |
| H | 1.0063  | 6.0882  | -0.375  | H | 0.3685  | 6.2534  | 0.1127  |
| H | 2.2726  | 5.9728  | 0.8302  | H | 1.4674  | 6.1403  | 1.4726  |
| H | -0.9488 | 1.6292  | -0.7205 | H | -1.1758 | 1.6889  | -0.7346 |
| H | 0.2331  | 1.4143  | 0.5616  | H | -0.1835 | 1.4879  | 0.6998  |
| H | -2.2164 | 3.264   | 0.5639  | H | -2.7317 | 3.1775  | 0.412   |
| H | -1.6994 | 3.9114  | 2.8339  | H | -2.592  | 3.7359  | 2.7683  |
| H | -0.2708 | 2.8961  | 2.8826  | H | -1.125  | 2.7956  | 2.9767  |
| H | 0.3774  | 5.2177  | 2.4743  | H | -0.5709 | 5.1657  | 2.7891  |
| H | -0.7392 | 5.3542  | 1.1333  | H | -1.4971 | 5.3258  | 1.3129  |
| H | 3.0072  | 3.1635  | 0.9669  | H | 2.37    | 3.3623  | 1.5437  |
| H | 2.3894  | 3.9669  | 2.3893  | H | 1.5329  | 4.0613  | 2.9096  |
| H | 1.6994  | 2.4286  | 1.881   | H | 1.0041  | 2.5157  | 2.2535  |
| H | -0.9326 | 3.7525  | -1.9239 | H | -1.1909 | 3.8772  | -1.8027 |
| H | -1.5106 | 0.9331  | 3.584   | H | -2.8568 | 1.1105  | 3.5396  |
| H | -5.9918 | 1.4072  | -0.0907 | H | -5.659  | 0.7607  | -1.5365 |
| H | -7.3266 | 0.7433  | 0.8253  | H | -7.2217 | 0.1149  | -1.0852 |
| H | -5.8662 | -0.3044 | 2.426   | H | -6.4332 | -0.6076 | 1.0743  |
| H | -5.3573 | 1.3661  | 2.2286  | H | -5.9369 | 1.0612  | 0.8352  |
| H | -6.9056 | -0.521  | -1.2835 | H | -6.0113 | -1.3663 | -2.688  |
| H | -6.8253 | -1.5193 | 0.1543  | H | -6.4489 | -2.1675 | -1.1925 |
| H | -2.0388 | -1.1998 | -0.3846 | H | -1.8178 | -1.549  | 0.0132  |
| H | -2.0639 | -2.1705 | 1.0764  | H | -2.3636 | -2.3113 | 1.4958  |
| H | -3.2159 | -3.9954 | 0.0191  | H | -3.0026 | -4.3477 | 0.3853  |
| H | -3.1581 | -2.5494 | -2.6609 | H | -1.9711 | -3.2758 | -2.2731 |
| H | -3.7913 | -4.1438 | -2.3182 | H | -2.6528 | -4.8531 | -1.9455 |
| H | -5.5579 | -3.2682 | -0.9233 | H | -4.8321 | -3.9352 | -1.4566 |
| H | -5.5787 | -2.4261 | -2.4571 | H | -4.2906 | -3.3059 | -2.997  |
| H | 0.4341  | -3.7022 | -2.2519 | H | 1.2485  | -3.9606 | -0.2197 |
| H | 0.0102  | -5.4773 | -0.8204 | H | 0.3378  | -5.6349 | 1.0902  |
| H | -1.5763 | -5.6494 | 0.1044  | H | -1.4781 | -5.8246 | 1.3512  |
| H | -4.3313 | 0.8694  | -1.4246 | H | -3.6025 | 0.1845  | -2.0839 |
| H | -3.2485 | -0.3663 | -2.045  | H | -2.339  | -1.0359 | -2.0788 |

|             |                  |                  |                  |             |                  |                  |                  |
|-------------|------------------|------------------|------------------|-------------|------------------|------------------|------------------|
| H           | -4.8588          | -0.1686          | -2.7283          | H           | -3.5855          | -1.0499          | -3.3216          |
| H           | 6.8102           | -2.2032          | 2.0881           | H           | 6.7411           | -1.9034          | 2.3771           |
| H           | 5.6712           | -2.7737          | 3.3088           | H           | 5.5991           | -3.1009          | 2.9887           |
| H           | 6.427            | -3.2491          | -0.34            | H           | 7.152            | -2.0351          | -0.2619          |
| H           | 5.4982           | -4.7332          | -0.4614          | H           | 6.7429           | -3.5309          | -1.0839          |
| H           | 2.0501           | -1.1722          | 0.1656           | H           | 2.3521           | -1.2277          | -0.3738          |
| H           | 2.9799           | 0.1753           | 0.7388           | H           | 2.7508           | 0.0068           | 0.78             |
| H           | 4.3142           | 0.2129           | -1.3708          | H           | 4.3669           | 1.0376           | -0.8003          |
| H           | 2.3862           | -1.9656          | -2.3217          | H           | 3.3608           | -1.0338          | -2.8147          |
| H           | 3.614            | -1.1659          | -3.2939          | H           | 4.4525           | 0.3041           | -3.1484          |
| H           | 4.4016           | -3.3548          | -2.4582          | H           | 5.6931           | -1.8027          | -2.7988          |
| H           | 5.4039           | -2.0129          | -1.9326          | H           | 6.1327           | -0.5527          | -1.6469          |
| H           | 1.1722           | 0.0086           | -3.4404          | H           | 1.6222           | 0.6186           | -3.4539          |
| H           | 3.1233           | -4.7423          | -0.8011          | H           | 4.5942           | -3.9402          | -2.0303          |
| H           | 2.876            | -4.1773          | 0.8566           | H           | 3.8416           | -4.0362          | -0.4332          |
| H           | 2.0998           | -3.3462          | -0.4805          | H           | 3.1657           | -2.9797          | -1.6665          |
| H           | 3.9931           | 0.4006           | 2.3829           | H           | 3.2936           | -0.2174          | 2.6347           |
| H           | -4.2518          | -2.4607          | 2.1772           | H           | -4.7884          | -2.6379          | 1.7481           |
| H           | 4.8442           | -4.5184          | 1.9417           | H           | 5.6012           | -4.3526          | 0.9829           |
| H           | 6.5882           | -4.5435          | 1.7394           | H           | 7.2815           | -3.9407          | 1.2833           |
| <b>4d-1</b> | <b>X axis(Å)</b> | <b>Y axis(Å)</b> | <b>Z axis(Å)</b> | <b>4d-2</b> | <b>X axis(Å)</b> | <b>Y axis(Å)</b> | <b>Z axis(Å)</b> |
| C           | -2.7674          | 5.0924           | -0.2394          | C           | -0.605           | 5.3162           | 0.9965           |
| C           | -2.2045          | 4.375            | -1.4689          | C           | -0.5231          | 4.929            | -0.4789          |
| C           | -1.415           | 3.1103           | -1.1015          | C           | 0.0448           | 3.5184           | -0.7003          |
| C           | -0.3128          | 3.4206           | -0.0473          | C           | 1.3951           | 3.311            | 0.0498           |
| C           | -0.9298          | 4.0611           | 1.2497           | C           | 1.2572           | 3.6407           | 1.5787           |
| C           | -1.7149          | 5.3408           | 0.8483           | C           | 0.7133           | 5.0857           | 1.7398           |
| C           | 0.5713           | 2.2081           | 0.3155           | C           | 1.9891           | 1.9005           | -0.1327          |
| C           | 1.6987           | 2.5899           | 1.3009           | C           | 3.3571           | 1.7076           | 0.571            |
| C           | 1.1372           | 3.2702           | 2.56             | C           | 3.3265           | 2.1923           | 2.0354           |
| C           | 0.2243           | 4.454            | 2.2158           | C           | 2.6655           | 3.5595           | 2.2255           |
| C           | -1.8896          | 3.1251           | 2.0315           | C           | 0.3197           | 2.679            | 2.3574           |
| C           | -0.824           | 2.4765           | -2.3421          | C           | 0.1825           | 3.2712           | -2.1847          |
| O           | 0.0449           | 2.9635           | -3.052           | O           | 0.9781           | 3.8187           | -2.9358          |
| O           | 0.5783           | 4.4176           | -0.6142          | O           | 2.3657           | 4.2454           | -0.4883          |
| C           | 2.5797           | 1.391            | 1.5623           | C           | 3.8187           | 0.263            | 0.4554           |
| O           | 3.2862           | 0.9443           | 0.4475           | O           | 3.3255           | -0.4511          | -0.6359          |
| C           | 2.7775           | 0.735            | 2.7037           | C           | 4.5941           | -0.4077          | 1.3066           |
| C           | 6.1299           | 0.5284           | -0.61            | C           | 3.7283           | -2.4333          | -2.953           |
| C           | 5.6178           | 0.3714           | 0.8223           | C           | 4.5597           | -2.2696          | -1.6792          |
| C           | 4.1611           | -0.1176          | 0.8784           | C           | 3.7175           | -1.8303          | -0.4739          |
| C           | 3.9703           | -1.4204          | 0.0491           | C           | 2.4919           | -2.7714          | -0.2604          |
| C           | 4.4141           | -1.2054          | -1.4475          | C           | 1.5977           | -2.8306          | -1.5548          |
| C           | 5.889            | -0.7166          | -1.4699          | C           | 2.4766           | -3.2951          | -2.7487          |
| C           | 2.542            | -2.0122          | 0.1113           | C           | 1.6334           | -2.4195          | 0.9782           |
| C           | 2.4383           | -3.3327          | -0.6881          | C           | 0.4498           | -3.396           | 1.1658           |
| C           | 2.9295           | -3.185           | -2.1366          | C           | -0.4022          | -3.5425          | -0.105           |

|   |         |         |         |   |         |         |         |
|---|---------|---------|---------|---|---------|---------|---------|
| C | 4.3262  | -2.5597 | -2.2049 | C | 0.4542  | -3.8611 | -1.3361 |
| C | 1.0666  | -3.9693 | -0.6192 | C | -0.3882 | -3.068  | 2.3862  |
| C | -0.1308 | -3.2742 | -1.1622 | C | -1.0897 | -1.7596 | 2.5005  |
| C | 0.8557  | -5.1806 | -0.0771 | C | -0.5415 | -3.9171 | 3.4164  |
| O | -0.1217 | -2.1174 | -1.5668 | O | -1.0397 | -0.8905 | 1.6381  |
| C | 3.5471  | -0.1811 | -2.2283 | C | 0.9364  | -1.4799 | -1.9338 |
| C | 3.7356  | -0.2911 | 2.3179  | C | 4.576   | -1.758  | 0.7661  |
| O | 4.11    | -1.1737 | 3.0778  | O | 5.1364  | -2.7008 | 1.308   |
| C | -4.5353 | -4.0676 | 1.4059  | C | -5.6012 | -1.7213 | 1.4057  |
| C | -3.5993 | -2.9217 | 1.1082  | C | -4.6629 | -0.5652 | 1.1519  |
| C | -3.9756 | -1.7754 | 0.4921  | C | -4.3671 | -0.0966 | -0.0854 |
| C | -5.4378 | -1.5458 | 0.0585  | C | -4.9171 | -0.7784 | -1.3545 |
| C | -6.273  | -2.8566 | 0.0848  | C | -5.6    | -2.1415 | -1.0493 |
| C | -3.0372 | -0.6179 | 0.1705  | C | -3.4571 | 1.0911  | -0.3775 |
| C | -3.1412 | -0.1489 | -1.2941 | C | -2.2831 | 0.7016  | -1.2952 |
| C | -4.5909 | 0.188   | -1.6582 | C | -2.8267 | 0.1092  | -2.6064 |
| C | -5.504  | -1.0061 | -1.3944 | C | -3.7538 | -1.0763 | -2.3385 |
| C | -2.2531 | 1.0384  | -1.5602 | C | -1.3123 | 1.8474  | -1.4916 |
| C | -1.3976 | 1.1604  | -2.5728 | C | -0.7388 | 2.2387  | -2.6284 |
| O | -2.3349 | 2.0907  | -0.6553 | O | -0.9378 | 2.5264  | -0.3311 |
| C | -6.0881 | -0.5269 | 1.0246  | C | -5.9555 | 0.1485  | -2.0276 |
| C | -2.2076 | -3.1597 | 1.5931  | C | -4.0836 | 0.0012  | 2.4105  |
| O | -1.7861 | -4.2834 | 1.8454  | O | -4.2455 | -0.5299 | 3.5061  |
| O | 4.8534  | -2.4324 | 0.6035  | O | 2.9891  | -4.118  | -0.0387 |
| C | -6.0088 | -3.6899 | 1.3286  | C | -6.4599 | -2.0875 | 0.2021  |
| H | -3.1955 | 6.0531  | -0.5496 | H | -0.8809 | 6.3746  | 1.0752  |
| H | -3.6005 | 4.5113  | 0.1713  | H | -1.4151 | 4.7578  | 1.4782  |
| H | -3.0404 | 4.1217  | -2.1335 | H | -1.5286 | 5.0064  | -0.912  |
| H | -1.5657 | 5.0719  | -2.0262 | H | 0.098   | 5.6685  | -1.001  |
| H | -2.2071 | 5.7731  | 1.7289  | H | 0.5693  | 5.319   | 2.8025  |
| H | -1.0193 | 6.1087  | 0.4858  | H | 1.4518  | 5.8088  | 1.3699  |
| H | -0.0314 | 1.3889  | 0.7248  | H | 1.2794  | 1.1385  | 0.2102  |
| H | 1.0431  | 1.819   | -0.596  | H | 2.1447  | 1.7198  | -1.2046 |
| H | 2.3457  | 3.3306  | 0.8089  | H | 4.0927  | 2.3191  | 0.0305  |
| H | 0.5853  | 2.5488  | 3.1739  | H | 2.8107  | 1.4556  | 2.6643  |
| H | 1.9637  | 3.6345  | 3.1834  | H | 4.3514  | 2.2532  | 2.4238  |
| H | 0.8352  | 5.2516  | 1.7736  | H | 3.3254  | 4.3305  | 1.8076  |
| H | -0.1838 | 4.872   | 3.1449  | H | 2.6011  | 3.7761  | 3.2998  |
| H | -1.4466 | 2.1489  | 2.2452  | H | 0.6023  | 1.6289  | 2.2473  |
| H | -2.1598 | 3.5731  | 2.9957  | H | 0.3475  | 2.9054  | 3.4303  |
| H | -2.8324 | 2.9427  | 1.512   | H | -0.7264 | 2.7588  | 2.0553  |
| H | 0.8997  | 4.09    | -1.481  | H | 2.3728  | 4.163   | -1.4652 |
| H | 2.3664  | 0.8738  | 3.6846  | H | 5.077   | -0.1041 | 2.2153  |
| H | 5.6579  | 1.4021  | -1.0731 | H | 3.4461  | -1.4452 | -3.3331 |
| H | 7.2046  | 0.7449  | -0.5854 | H | 4.3521  | -2.887  | -3.7325 |
| H | 6.2715  | -0.3273 | 1.3601  | H | 5.0635  | -3.22   | -1.4613 |
| H | 5.7155  | 1.3395  | 1.3302  | H | 5.3524  | -1.5363 | -1.8758 |

|             |                  |                  |                  |             |                  |                  |                  |
|-------------|------------------|------------------|------------------|-------------|------------------|------------------|------------------|
| H           | 6.5531           | -1.515           | -1.114           | H           | 2.794            | -4.3351          | -2.5978          |
| H           | 6.2003           | -0.5037          | -2.5005          | H           | 1.8871           | -3.292           | -3.6745          |
| H           | 2.2789           | -2.2391          | 1.1527           | H           | 2.2499           | -2.4803          | 1.8846           |
| H           | 1.8122           | -1.2758          | -0.2382          | H           | 1.2831           | -1.3858          | 0.9113           |
| H           | 3.1345           | -4.037           | -0.2086          | H           | 0.8943           | -4.3869          | 1.3431           |
| H           | 2.9626           | -4.1709          | -2.6179          | H           | -1.1335          | -4.3493          | 0.0329           |
| H           | 2.2287           | -2.5852          | -2.7279          | H           | -0.9885          | -2.6362          | -0.2918          |
| H           | 5.0513           | -3.2733          | -1.7927          | H           | 0.8691           | -4.8711          | -1.2246          |
| H           | 4.6061           | -2.426           | -3.2577          | H           | -0.195           | -3.9019          | -2.2202          |
| H           | -1.0626          | -3.8656          | -1.1692          | H           | -1.6681          | -1.6068          | 3.4278           |
| H           | -0.13            | -5.6335          | -0.0092          | H           | -1.144           | -3.6804          | 4.2891           |
| H           | 1.6738           | -5.7568          | 0.3461           | H           | -0.0632          | -4.8928          | 3.4136           |
| H           | 3.6904           | 0.8485           | -1.8949          | H           | 1.6451           | -0.7416          | -2.3135          |
| H           | 3.8092           | -0.1914          | -3.2935          | H           | 0.1962           | -1.624           | -2.7301          |
| H           | 2.4772           | -0.3948          | -2.1601          | H           | 0.418            | -1.0205          | -1.0901          |
| H           | -4.3301          | -4.876           | 0.6924           | H           | -5.0052          | -2.5932          | 1.705            |
| H           | -4.343           | -4.4686          | 2.4087           | H           | -6.2752          | -1.49            | 2.2397           |
| H           | -6.0363          | -3.4731          | -0.7934          | H           | -4.8416          | -2.9236          | -0.9057          |
| H           | -7.3443          | -2.6287          | 0.0166           | H           | -6.21            | -2.4649          | -1.9021          |
| H           | -3.2727          | 0.2059           | 0.8565           | H           | -4.0491          | 1.8891           | -0.8437          |
| H           | -1.9895          | -0.868           | 0.3558           | H           | -3.0604          | 1.5366           | 0.5352           |
| H           | -2.8155          | -0.9797          | -1.9366          | H           | -1.7173          | -0.09            | -0.7874          |
| H           | -4.9419          | 1.0627           | -1.0973          | H           | -3.3582          | 0.8762           | -3.1829          |
| H           | -4.6576          | 0.4573           | -2.7202          | H           | -1.9998          | -0.2405          | -3.2369          |
| H           | -6.5357          | -0.7281          | -1.6454          | H           | -4.154           | -1.4388          | -3.2942          |
| H           | -5.2227          | -1.8033          | -2.0966          | H           | -3.1348          | -1.8918          | -1.9384          |
| H           | -1.1513          | 0.485            | -3.3696          | H           | -0.8257          | 1.871            | -3.6325          |
| H           | -7.1408          | -0.3602          | 0.7686           | H           | -5.5182          | 1.0915           | -2.3698          |
| H           | -6.0512          | -0.8728          | 2.0634           | H           | -6.3994          | -0.3327          | -2.9068          |
| H           | -5.5931          | 0.4491           | 0.9995           | H           | -6.7716          | 0.404            | -1.3426          |
| H           | -1.5625          | -2.2782          | 1.712            | H           | -3.4812          | 0.9135           | 2.3248           |
| H           | 4.6782           | -2.5007          | 1.5657           | H           | 3.6736           | -4.0872          | 0.662            |
| H           | -6.304           | -3.1398          | 2.2293           | H           | -7.2705          | -1.3598          | 0.0808           |
| H           | -6.6194          | -4.6             | 1.3053           | H           | -6.9346          | -3.0606          | 0.3729           |
| <b>4d-3</b> | <b>X axis(Å)</b> | <b>Y axis(Å)</b> | <b>Z axis(Å)</b> | <b>4d-4</b> | <b>X axis(Å)</b> | <b>Y axis(Å)</b> | <b>Z axis(Å)</b> |
| C           | -2.7942          | 5.0535           | -0.3643          | C           | 2.5226           | 5.165            | -0.6268          |
| C           | -2.2462          | 4.2799           | -1.5662          | C           | 2.2077           | 4.6656           | 0.7826           |
| C           | -1.4516          | 3.0335           | -1.1499          | C           | 1.3202           | 3.4074           | 0.7791           |
| C           | -0.3363          | 3.3937           | -0.1261          | C           | 0.0284           | 3.63             | -0.0593          |
| C           | -0.9377          | 4.092            | 1.1484           | C           | 0.3689           | 4.0748           | -1.5276          |
| C           | -1.7292          | 5.3516           | 0.6987           | C           | 1.2657           | 5.3427           | -1.4824          |
| C           | 0.5557           | 2.2009           | 0.2795           | C           | -0.9385          | 2.4248           | -0.0753          |
| C           | 1.6941           | 2.6305           | 1.2315           | C           | -2.255           | 2.7441           | -0.8318          |
| C           | 1.1464           | 3.362            | 2.4672           | C           | -1.9708          | 3.2867           | -2.2462          |
| C           | 0.2276           | 4.5287           | 2.0819           | C           | -0.9529          | 4.43             | -2.2603          |
| C           | -1.8869          | 3.1921           | 1.984            | C           | 1.0973           | 2.9916           | -2.3658          |
| C           | -0.8772          | 2.3397           | -2.3659          | C           | 1.0106           | 3.012            | 2.2063           |

|   |         |         |         |   |         |         |         |
|---|---------|---------|---------|---|---------|---------|---------|
| O | -0.0178 | 2.7913  | -3.1099 | O | 0.2262  | 3.5754  | 2.9571  |
| O | 0.5447  | 4.365   | -0.7504 | O | -0.7024 | 4.7324  | 0.5432  |
| C | 2.5849  | 1.4482  | 1.5299  | C | -3.218  | 1.5713  | -0.8262 |
| O | 3.304   | 0.9822  | 0.4315  | O | -3.1754 | 0.7492  | 0.2986  |
| C | 2.7807  | 0.8221  | 2.6883  | C | -4.1082 | 1.2551  | -1.766  |
| C | 6.1639  | 0.5874  | -0.5872 | C | -4.8123 | -0.3576 | 2.6383  |
| C | 5.6394  | 0.4522  | 0.843   | C | -5.2932 | 0.0144  | 1.2346  |
| C | 4.1894  | -0.0568 | 0.8948  | C | -4.2222 | -0.2363 | 0.1623  |
| C | 4.0265  | -1.3794 | 0.0915  | C | -3.6915 | -1.6985 | 0.2249  |
| C | 4.4814  | -1.1878 | -1.4052 | C | -3.1139 | -2.0298 | 1.6504  |
| C | 5.9492  | -0.678  | -1.4238 | C | -4.2179 | -1.7684 | 2.7125  |
| C | 2.6069  | -1.9928 | 0.1529  | C | -2.66   | -2.041  | -0.8739 |
| C | 2.5326  | -3.3306 | -0.6207 | C | -2.2028 | -3.5162 | -0.7975 |
| C | 3.0323  | -3.2019 | -2.0679 | C | -1.7154 | -3.9135 | 0.6049  |
| C | 4.4202  | -2.5578 | -2.1365 | C | -2.7184 | -3.5323 | 1.6982  |
| C | 1.174   | -3.9946 | -0.5526 | C | -1.1944 | -3.8755 | -1.8709 |
| C | -0.0357 | -3.3311 | -1.1083 | C | 0.1178  | -3.1774 | -1.9397 |
| C | 0.9871  | -5.2071 | -0.0045 | C | -1.4175 | -4.8249 | -2.7951 |
| O | -0.0541 | -2.1735 | -1.5108 | O | 0.4262  | -2.2483 | -1.2027 |
| C | 3.6071  | -0.1923 | -2.2147 | C | -1.8573 | -1.2041 | 2.0369  |
| C | 3.7511  | -0.2038 | 2.3335  | C | -4.7694 | 0.0876  | -1.2071 |
| O | 4.1259  | -1.0667 | 3.1156  | O | -5.6289 | -0.5435 | -1.8071 |
| C | -4.6489 | -4.1301 | 1.1953  | C | 4.6149  | -4.2211 | -0.0422 |
| C | -3.6885 | -2.971  | 1.1051  | C | 3.6183  | -3.1326 | 0.2828  |
| C | -4.0451 | -1.742  | 0.6637  | C | 3.8657  | -1.81   | 0.1158  |
| C | -5.5146 | -1.3852 | 0.3617  | C | 5.2438  | -1.3089 | -0.3632 |
| C | -6.4992 | -2.5507 | 0.6622  | C | 6.3241  | -2.4251 | -0.3194 |
| C | -3.0663 | -0.6275 | 0.3198  | C | 2.8536  | -0.6908 | 0.3419  |
| C | -3.1926 | -0.2224 | -1.166  | C | 3.3897  | 0.3981  | 1.285   |
| C | -4.6443 | 0.1057  | -1.5507 | C | 4.73    | 0.9518  | 0.781   |
| C | -5.6136 | -1.0056 | -1.1373 | C | 5.7442  | -0.1693 | 0.5644  |
| C | -2.299  | 0.9439  | -1.4984 | C | 2.3929  | 1.5149  | 1.4598  |
| C | -1.4554 | 1.0147  | -2.5256 | C | 1.7856  | 1.8454  | 2.5973  |
| O | -2.366  | 2.0378  | -0.6431 | O | 2.101   | 2.2775  | 0.3308  |
| C | -5.9802 | -0.198  | 1.2404  | C | 5.1272  | -0.7954 | -1.8178 |
| C | -2.2911 | -3.3027 | 1.5085  | C | 2.3181  | -3.6677 | 0.7961  |
| O | -1.8883 | -4.4561 | 1.6119  | O | 2.0727  | -4.8694 | 0.8483  |
| O | 4.9199  | -2.3654 | 0.6754  | O | -4.8179 | -2.5927 | 0.0161  |
| C | -5.9052 | -3.916  | 0.3591  | C | 5.8073  | -3.7465 | -0.8628 |
| H | -3.2263 | 5.9991  | -0.7134 | H | 3.0494  | 6.1243  | -0.559  |
| H | -3.6223 | 4.4922  | 0.0827  | H | 3.2175  | 4.4727  | -1.115  |
| H | -3.0901 | 3.9959  | -2.2079 | H | 3.1573  | 4.4638  | 1.2948  |
| H | -1.6146 | 4.95    | -2.1632 | H | 1.7182  | 5.4709  | 1.3453  |
| H | -2.2115 | 5.8231  | 1.5644  | H | 1.5633  | 5.6314  | -2.4986 |
| H | -1.0388 | 6.1028  | 0.2935  | H | 0.6948  | 6.1915  | -1.0838 |
| H | -0.0394 | 1.3999  | 0.7336  | H | -0.4574 | 1.536   | -0.4996 |
| H | 1.0172  | 1.7715  | -0.6192 | H | -1.2024 | 2.1699  | 0.959   |

|   |         |         |         |   |         |         |         |
|---|---------|---------|---------|---|---------|---------|---------|
| H | 2.3302  | 3.3529  | 0.6997  | H | -2.7657 | 3.5414  | -0.2731 |
| H | 0.6029  | 2.6668  | 3.1177  | H | -1.62   | 2.4754  | -2.896  |
| H | 1.9793  | 3.7538  | 3.0648  | H | -2.8997 | 3.659   | -2.6967 |
| H | 0.8318  | 5.3063  | 1.5969  | H | -1.4158 | 5.3141  | -1.803  |
| H | -0.1697 | 4.9874  | 2.9964  | H | -0.7461 | 4.7095  | -3.3014 |
| H | -1.4412 | 2.2258  | 2.2337  | H | 0.5596  | 2.0402  | -2.3865 |
| H | -2.143  | 3.6822  | 2.9314  | H | 1.2027  | 3.3211  | -3.4068 |
| H | -2.8372 | 2.9885  | 1.4868  | H | 2.1079  | 2.7807  | -2.0107 |
| H | 0.8566  | 3.9972  | -1.6044 | H | -0.8479 | 4.5236  | 1.4907  |
| H | 2.3602  | 0.98    | 3.6623  | H | -4.3437 | 1.7158  | -2.7058 |
| H | 5.6845  | 1.4447  | -1.0726 | H | -4.0756 | 0.3785  | 2.9789  |
| H | 7.2351  | 0.8196  | -0.5564 | H | -5.6545 | -0.2861 | 3.337   |
| H | 6.2976  | -0.2255 | 1.4016  | H | -6.2007 | -0.5585 | 1.005   |
| H | 5.7181  | 1.4319  | 1.3316  | H | -5.5875 | 1.0718  | 1.2398  |
| H | 6.6214  | -1.4593 | -1.0457 | H | -5.0338 | -2.4927 | 2.5899  |
| H | 6.2672  | -0.4813 | -2.4557 | H | -3.8179 | -1.9342 | 3.721   |
| H | 2.3375  | -2.2028 | 1.1962  | H | -3.1081 | -1.8928 | -1.865  |
| H | 1.8693  | -1.2754 | -0.2185 | H | -1.8114 | -1.3538 | -0.8144 |
| H | 3.2382  | -4.0121 | -0.1221 | H | -3.0988 | -4.1261 | -0.9867 |
| H | 3.0839  | -4.1957 | -2.5313 | H | -1.5464 | -4.9973 | 0.6439  |
| H | 2.3266  | -2.6233 | -2.6745 | H | -0.7487 | -3.4513 | 0.8257  |
| H | 5.152   | -3.2523 | -1.7037 | H | -3.6096 | -4.1645 | 1.5937  |
| H | 4.7077  | -2.4407 | -3.1892 | H | -2.2901 | -3.7816 | 2.6775  |
| H | -0.9505 | -3.9481 | -1.1279 | H | 0.8152  | -3.5415 | -2.7134 |
| H | 0.0112  | -5.682  | 0.0582  | H | -0.692  | -5.0854 | -3.5599 |
| H | 1.8155  | -5.7637 | 0.4249  | H | -2.3495 | -5.3838 | -2.807  |
| H | 3.7342  | 0.8461  | -1.9029 | H | -2.0739 | -0.1495 | 2.2175  |
| H | 3.8777  | -0.222  | -3.2773 | H | -1.4201 | -1.5858 | 2.9677  |
| H | 2.5396  | -0.4188 | -2.15   | H | -1.0737 | -1.245  | 1.2757  |
| H | -4.1759 | -5.0563 | 0.8484  | H | 4.9753  | -4.6504 | 0.9016  |
| H | -4.9217 | -4.281  | 2.2472  | H | 4.1304  | -5.0322 | -0.5994 |
| H | -7.4304 | -2.4208 | 0.0966  | H | 6.6594  | -2.589  | 0.7141  |
| H | -6.7868 | -2.5381 | 1.7229  | H | 7.2146  | -2.1188 | -0.8826 |
| H | -3.2495 | 0.2248  | 0.9843  | H | 2.5971  | -0.2559 | -0.6329 |
| H | -2.0251 | -0.9112 | 0.4939  | H | 1.9069  | -1.0498 | 0.7493  |
| H | -2.8789 | -1.0858 | -1.7709 | H | 3.5676  | -0.0662 | 2.2661  |
| H | -4.9578 | 1.0559  | -1.1011 | H | 4.5963  | 1.5126  | -0.1521 |
| H | -4.7154 | 0.2494  | -2.6367 | H | 5.1366  | 1.6643  | 1.5102  |
| H | -6.6355 | -0.6869 | -1.3798 | H | 6.6711  | 0.2613  | 0.164   |
| H | -5.4109 | -1.887  | -1.76   | H | 5.9993  | -0.5825 | 1.5502  |
| H | -1.2214 | 0.3023  | -3.2935 | H | 1.8402  | 1.416   | 3.5788  |
| H | -5.4138 | 0.7207  | 1.0637  | H | 4.4557  | 0.0639  | -1.909  |
| H | -7.0346 | 0.0354  | 1.0506  | H | 6.1041  | -0.4782 | -2.2008 |
| H | -5.8789 | -0.4357 | 2.3062  | H | 4.7431  | -1.5701 | -2.4905 |
| H | -1.623  | -2.4558 | 1.7202  | H | 1.5801  | -2.9374 | 1.148   |
| H | 4.7357  | -2.4165 | 1.637   | H | -5.2799 | -2.3227 | -0.8053 |
| H | -6.6359 | -4.7006 | 0.5869  | H | 5.5222  | -3.6442 | -1.916  |

| H           | -5.6695          | -4.002           | -0.7083          | H           | 6.6006           | -4.5022          | -0.827           |
|-------------|------------------|------------------|------------------|-------------|------------------|------------------|------------------|
| <b>4d-5</b> | <b>X axis(Å)</b> | <b>Y axis(Å)</b> | <b>Z axis(Å)</b> | <b>4d-6</b> | <b>X axis(Å)</b> | <b>Y axis(Å)</b> | <b>Z axis(Å)</b> |
| C           | -0.5958          | 5.3378           | 1.041            | C           | -3.1639          | -4.4084          | -1.8723          |
| C           | -0.5473          | 4.9508           | -0.436           | C           | -3.6481          | -4.1388          | -0.4481          |
| C           | 0.0064           | 3.5365           | -0.6687          | C           | -2.8169          | -3.0656          | 0.2729           |
| C           | 1.3719           | 3.3219           | 0.0514           | C           | -1.2947          | -3.3861          | 0.2193           |
| C           | 1.2695           | 3.6516           | 1.583            | C           | -0.8076          | -3.5648          | -1.2669          |
| C           | 0.7365           | 5.0994           | 1.7564           | C           | -1.6573          | -4.6727          | -1.9469          |
| C           | 1.9565           | 1.9092           | -0.1452          | C           | -0.4147          | -2.35            | 0.9514           |
| C           | 3.3403           | 1.713            | 0.5261           | C           | 1.0844           | -2.7192          | 0.9074           |
| C           | 3.3427           | 2.1937           | 1.9921           | C           | 1.5816           | -3.0208          | -0.5155          |
| C           | 2.6914           | 3.5633           | 2.1989           | C           | 0.6803           | -4.0101          | -1.2569          |
| C           | 0.3448           | 2.6942           | 2.3818           | C           | -0.9049          | -2.2771          | -2.1296          |
| C           | 0.1112           | 3.2862           | -2.1554          | C           | -3.3124          | -2.9196          | 1.6946           |
| O           | 0.8926           | 3.8293           | -2.9245          | O           | -3.1618          | -3.7323          | 2.5963           |
| O           | 2.3344           | 4.2527           | -0.5077          | O           | -1.0732          | -4.6558          | 0.886            |
| C           | 3.7996           | 0.269            | 0.3952           | C           | 1.9265           | -1.6318          | 1.5234           |
| O           | 3.2826           | -0.4416          | -0.6872          | O           | 1.7484           | -0.349           | 1.0161           |
| C           | 4.5956           | -0.4038          | 1.2255           | C           | 2.8374           | -1.7959          | 2.4797           |
| C           | 3.6317           | -2.4151          | -3.0207          | C           | 1.2066           | 2.6016           | 1.7055           |
| C           | 4.4937           | -2.2545          | -1.7669          | C           | 1.9              | 1.5347           | 2.5517           |
| C           | 3.6802           | -1.8209          | -0.54            | C           | 2.677            | 0.5164           | 1.7037           |
| C           | 2.4614           | -2.7646          | -0.3006          | C           | 3.6601           | 1.2198           | 0.722            |
| C           | 1.5361           | -2.8202          | -1.5729          | C           | 2.9003           | 2.2444           | -0.2012          |
| C           | 2.3867           | -3.2798          | -2.7891          | C           | 2.1459           | 3.2651           | 0.6941           |
| C           | 1.6332           | -2.4179          | 0.9591           | C           | 4.4961           | 0.2407           | -0.1325          |
| C           | 0.4549           | -3.3955          | 1.1723           | C           | 5.4813           | 0.9766           | -1.0692          |
| C           | -0.4281          | -3.5382          | -0.0776          | C           | 4.8075           | 2.0723           | -1.9125          |
| C           | 0.3986           | -3.8521          | -1.3301          | C           | 3.9401           | 3.0094           | -1.0664          |
| C           | -0.3531          | -3.0705          | 2.4134           | C           | 6.2885           | 0.0168           | -1.9221          |
| C           | -1.038           | -1.7559          | 2.5533           | C           | 5.6093           | -0.8675          | -2.9102          |
| C           | -0.4913          | -3.926           | 3.4403           | C           | 7.6252           | -0.0896          | -1.8384          |
| O           | -1.007           | -0.8855          | 1.6912           | O           | 4.3956           | -0.8924          | -3.0713          |
| C           | 0.8643           | -1.4693          | -1.9322          | C           | 1.8742           | 1.5943           | -1.1685          |
| C           | 4.5678           | -1.7518          | 0.6797           | C           | 3.3923           | -0.4585          | 2.6128           |
| O           | 5.1433           | -2.6956          | 1.2039           | O           | 4.3394           | -0.1989          | 3.3424           |
| C           | -5.3171          | -1.9344          | 1.3731           | C           | -3.4529          | 5.2127           | -0.0289          |
| C           | -4.6019          | -0.619           | 1.1805           | C           | -3.0877          | 3.8224           | 0.4394           |
| C           | -4.431           | -0.0419          | -0.0342          | C           | -3.4445          | 2.6903           | -0.2162          |
| C           | -5.0363          | -0.6493          | -1.3154          | C           | -4.332           | 2.742            | -1.4789          |
| C           | -5.9233          | -1.8953          | -1.0405          | C           | -4.9615          | 4.1454           | -1.7021          |
| C           | -3.5366          | 1.1595           | -0.3112          | C           | -3.0347          | 1.2771           | 0.179            |
| C           | -2.3525          | 0.7367           | -1.2078          | C           | -4.2468          | 0.3415           | 0.3367           |
| C           | -2.8641          | 0.0846           | -2.5083          | C           | -5.0967          | 0.3281           | -0.9408          |
| C           | -3.8563          | -1.0535          | -2.2372          | C           | -5.5134          | 1.743            | -1.3386          |
| C           | -1.3778          | 1.8738           | -1.4283          | C           | -3.7982          | -1.0488          | 0.7053           |
| C           | -0.8234          | 2.2566           | -2.5773          | C           | -3.9781          | -1.6406          | 1.8837           |



|   |         |         |         |   |         |         |         |
|---|---------|---------|---------|---|---------|---------|---------|
| O | -0.9753 | 2.5522  | -0.277  | O | -3.1182 | -1.7631 | -0.2756 |
| C | -5.9499 | 0.3685  | -2.0404 | C | -3.4804 | 2.3841  | -2.7199 |
| C | -4.0382 | -0.0557 | 2.4475  | C | -2.2823 | 3.829   | 1.7006  |
| O | -4.1157 | -0.6411 | 3.5243  | O | -1.983  | 4.8614  | 2.291   |
| O | 2.9653  | -4.1113 | -0.0958 | O | 4.6077  | 1.9907  | 1.5068  |
| C | -5.3939 | -2.7566 | 0.0928  | C | -3.9656 | 5.2673  | -1.4621 |
| H | -0.864  | 6.3976  | 1.126   | H | -3.7006 | -5.2753 | -2.276  |
| H | -1.3986 | 4.7836  | 1.5395  | H | -3.4318 | -3.5633 | -2.516  |
| H | -1.5612 | 5.0348  | -0.848  | H | -4.7024 | -3.8371 | -0.4943 |
| H | 0.0675  | 5.6863  | -0.971  | H | -3.6191 | -5.0787 | 0.1183  |
| H | 0.6161  | 5.3326  | 2.822   | H | -1.3657 | -4.7795 | -2.9996 |
| H | 1.471   | 5.8189  | 1.3716  | H | -1.4521 | -5.6436 | -1.4776 |
| H | 1.2528  | 1.1492  | 0.214   | H | -0.5813 | -1.3496 | 0.5357  |
| H | 2.0865  | 1.7284  | -1.2205 | H | -0.7055 | -2.2956 | 2.0089  |
| H | 4.0638  | 2.3258  | -0.0291 | H | 1.2189  | -3.6344 | 1.5013  |
| H | 2.8373  | 1.4573  | 2.6296  | H | 1.6666  | -2.0954 | -1.0986 |
| H | 4.3758  | 2.25    | 2.3589  | H | 2.597   | -3.4359 | -0.4694 |
| H | 3.3451  | 4.3322  | 1.7678  | H | 0.7809  | -4.9981 | -0.7897 |
| H | 2.6514  | 3.7783  | 3.2746  | H | 1.0489  | -4.1275 | -2.2841 |
| H | 0.6195  | 1.6428  | 2.2646  | H | -0.4099 | -1.419  | -1.6673 |
| H | 0.3978  | 2.9197  | 3.454   | H | -0.4285 | -2.4343 | -3.1051 |
| H | -0.7073 | 2.7799  | 2.1034  | H | -1.9327 | -1.9758 | -2.3408 |
| H | 2.3206  | 4.1695  | -1.4844 | H | -1.5009 | -4.6258 | 1.7677  |
| H | 5.0995  | -0.1029 | 2.1237  | H | 3.1597  | -2.6765 | 3.0008  |
| H | 3.3385  | -1.4262 | -3.3902 | H | 0.3509  | 2.1558  | 1.1872  |
| H | 4.237   | -2.865  | -3.8167 | H | 0.7928  | 3.3709  | 2.368   |
| H | 5.0041  | -3.2048 | -1.5646 | H | 2.5769  | 2.0294  | 3.26    |
| H | 5.2801  | -1.5191 | -1.98   | H | 1.138   | 1.0248  | 3.1551  |
| H | 2.7093  | -4.3198 | -2.649  | H | 2.8655  | 3.885   | 1.2446  |
| H | 1.7752  | -3.2749 | -3.7004 | H | 1.566   | 3.958   | 0.071   |
| H | 2.2712  | -2.4811 | 1.8503  | H | 5.0936  | -0.4056 | 0.524   |
| H | 1.2815  | -1.384  | 0.9031  | H | 3.8348  | -0.4232 | -0.6967 |
| H | 0.9038  | -4.3866 | 1.3362  | H | 6.1933  | 1.5009  | -0.4142 |
| H | -1.1552 | -4.3462 | 0.0753  | H | 5.5767  | 2.6684  | -2.4205 |
| H | -1.0199 | -2.6319 | -0.2466 | H | 4.1957  | 1.6365  | -2.7095 |
| H | 0.8168  | -4.8623 | -1.2321 | H | 4.5958  | 3.6152  | -0.4277 |
| H | -0.2717 | -3.8904 | -2.1985 | H | 3.4321  | 3.7208  | -1.7302 |
| H | -1.584  | -1.6    | 3.4994  | H | 6.2723  | -1.5203 | -3.5031 |
| H | -1.0724 | -3.6903 | 4.3276  | H | 8.2011  | -0.7775 | -2.4501 |
| H | -0.0226 | -4.9061 | 3.4195  | H | 8.1911  | 0.5229  | -1.1413 |
| H | 1.5639  | -0.726  | -2.3187 | H | 1.0021  | 1.1795  | -0.6591 |
| H | 0.1135  | -1.6124 | -2.7184 | H | 1.4861  | 2.3412  | -1.872  |
| H | 0.3559  | -1.0166 | -1.0784 | H | 2.3085  | 0.7883  | -1.7653 |
| H | -4.8076 | -2.5498 | 2.1243  | H | -4.2212 | 5.6133  | 0.645   |
| H | -6.3274 | -1.734  | 1.751   | H | -2.5852 | 5.8803  | 0.0398  |
| H | -6.0213 | -2.5029 | -1.949  | H | -5.8115 | 4.2933  | -1.0217 |
| H | -6.9426 | -1.5808 | -0.7757 | H | -5.3687 | 4.2258  | -2.7179 |

|             |                  |                  |                  |             |                  |                  |                  |
|-------------|------------------|------------------|------------------|-------------|------------------|------------------|------------------|
| H           | -4.116           | 1.9603           | -0.785           | H           | -2.351           | 0.888            | -0.5869          |
| H           | -3.1473          | 1.6055           | 0.6049           | H           | -2.4597          | 1.2474           | 1.1067           |
| H           | -1.7925          | -0.0361          | -0.6646          | H           | -4.8719          | 0.7337           | 1.1521           |
| H           | -3.3357          | 0.8379           | -3.1509          | H           | -4.5523          | -0.1407          | -1.7695          |
| H           | -2.0219          | -0.3243          | -3.08            | H           | -5.9971          | -0.2791          | -0.7829          |
| H           | -4.2373          | -1.4227          | -3.198           | H           | -6.0794          | 1.6968           | -2.2779          |
| H           | -3.3             | -1.8869          | -1.7881          | H           | -6.2151          | 2.109            | -0.5761          |
| H           | -0.9329          | 1.886            | -3.5781          | H           | -4.4487          | -1.2944          | 2.7837           |
| H           | -5.4168          | 1.2546           | -2.3953          | H           | -3.0865          | 1.3638           | -2.6808          |
| H           | -6.4208          | -0.0894          | -2.9185          | H           | -4.0743          | 2.4608           | -3.638           |
| H           | -6.7509          | 0.7175           | -1.3778          | H           | -2.6193          | 3.0531           | -2.8253          |
| H           | -3.5466          | 0.923            | 2.388            | H           | -1.9694          | 2.8578           | 2.1015           |
| H           | 3.6662           | -4.0822          | 0.5886           | H           | 4.99             | 1.4078           | 2.1959           |
| H           | -6.0547          | -3.6171          | 0.2482           | H           | -3.1277          | 5.1952           | -2.165           |
| H           | -4.4051          | -3.158           | -0.1594          | H           | -4.4429          | 6.2372           | -1.6437          |
| <b>4d-7</b> | <b>X axis(Å)</b> | <b>Y axis(Å)</b> | <b>Z axis(Å)</b> | <b>4d-8</b> | <b>X axis(Å)</b> | <b>Y axis(Å)</b> | <b>Z axis(Å)</b> |
| C           | 3.6154           | -4.0006          | 1.9246           | C           | 2.6886           | 5.1034           | -0.5966          |
| C           | 3.9308           | -3.7986          | 0.4421           | C           | 2.3838           | 4.5888           | 0.8096           |
| C           | 2.9183           | -2.8801          | -0.2607          | C           | 1.4562           | 3.3606           | 0.8016           |
| C           | 1.4577           | -3.3673          | -0.036           | C           | 0.1575           | 3.637            | -0.0099          |
| C           | 1.13             | -3.4672          | 1.5009           | C           | 0.4868           | 4.0955           | -1.4765          |
| C           | 2.1613           | -4.4138          | 2.1744           | C           | 1.4228           | 5.3346           | -1.426           |
| C           | 0.3938           | -2.515           | -0.7614          | C           | -0.8449          | 2.461            | -0.0287          |
| C           | -1.0366          | -3.06            | -0.5436          | C           | -2.1632          | 2.8294           | -0.7588          |
| C           | -1.3637          | -3.2557          | 0.9449           | C           | -1.8866          | 3.3893           | -2.168           |
| C           | -0.2914          | -4.068           | 1.6748           | C           | -0.8358          | 4.5026           | -2.1799          |
| C           | 1.1537           | -2.1071          | 2.2502           | C           | 1.1674           | 3.0051           | -2.3453          |
| C           | 3.2593           | -2.7774          | -1.7306          | C           | 1.158            | 2.951            | 2.2271           |
| O           | 3.1235           | -3.6623          | -2.5641          | O           | 0.4148           | 3.5339           | 3.0044           |
| O           | 1.34             | -4.7094          | -0.5766          | O           | -0.5295          | 4.7503           | 0.6229           |
| C           | -2.0815          | -2.1822          | -1.1851          | C           | -3.1587          | 1.6837           | -0.7598          |
| O           | -1.8716          | -0.8087          | -1.1294          | O           | -3.1041          | 0.8198           | 0.3334           |
| C           | -3.1969          | -2.6117          | -1.7713          | C           | -4.0877          | 1.4273           | -1.6801          |
| C           | -1.7355          | 1.776            | -2.8134          | C           | -4.7228          | -0.27            | 2.6951           |
| C           | -2.5553          | 0.5121           | -3.0651          | C           | -5.2252          | 0.156            | 1.3147           |
| C           | -3.0034          | -0.1767          | -1.7664          | C           | -4.1964          | -0.1166          | 0.2065           |
| C           | -3.7283          | 0.8148           | -0.8104          | C           | -3.7308          | -1.6022          | 0.2208           |
| C           | -2.8181          | 2.0605           | -0.4942          | C           | -3.1333          | -1.9956          | 1.622            |
| C           | -2.4118          | 2.7376           | -1.8316          | C           | -4.1949          | -1.7085          | 2.7201           |
| C           | -4.2264          | 0.1643           | 0.4996           | C           | -2.7436          | -1.964           | -0.912           |
| C           | -4.9654          | 1.1726           | 1.4088           | C           | -2.3569          | -3.4612          | -0.8841          |
| C           | -4.1661          | 2.4637           | 1.6537           | C           | -1.8576          | -3.9202          | 0.4953           |
| C           | -3.6324          | 3.0757           | 0.3548           | C           | -2.8107          | -3.5163          | 1.6243           |
| C           | -5.4351          | 0.5398           | 2.7046           | C           | -1.3923          | -3.838           | -1.9914          |
| C           | -4.4483          | -0.0075          | 3.6776           | C           | -0.0448          | -3.211           | -2.065           |
| C           | -6.7319          | 0.4381           | 3.0412           | C           | -1.6872          | -4.7397          | -2.9429          |
| O           | -3.2387          | -0.0058          | 3.4859           | O           | 0.3322           | -2.3341          | -1.297           |

|   |         |         |         |   |         |         |         |
|---|---------|---------|---------|---|---------|---------|---------|
| C | -1.5226 | 1.7246  | 0.2939  | C | -1.8288 | -1.2401 | 1.9926  |
| C | -3.8689 | -1.3683 | -2.1105 | C | -4.7688 | 0.2636  | -1.138  |
| O | -4.9991 | -1.3258 | -2.5767 | O | -5.6639 | -0.3224 | -1.7317 |
| C | 2.7901  | 5.4158  | -0.101  | C | 4.5709  | -4.2874 | 0.138   |
| C | 2.4748  | 3.989   | -0.488  | C | 3.5099  | -3.2224 | 0.2692  |
| C | 3.0744  | 2.907   | 0.0677  | C | 3.7258  | -1.9216 | -0.0431 |
| C | 4.186   | 3.0669  | 1.1275  | C | 5.0627  | -1.443  | -0.6467 |
| C | 4.705   | 4.5286  | 1.2258  | C | 6.0657  | -2.6002 | -0.9144 |
| C | 2.7427  | 1.454   | -0.2542 | C | 2.7529  | -0.7804 | 0.2212  |
| C | 3.9894  | 0.6348  | -0.6373 | C | 3.3743  | 0.2357  | 1.1985  |
| C | 5.0659  | 0.7312  | 0.4514  | C | 4.7581  | 0.719   | 0.7273  |
| C | 5.41    | 2.1873  | 0.7554  | C | 5.6881  | -0.4434 | 0.3607  |
| C | 3.6304  | -0.8055 | -0.8982 | C | 2.4537  | 1.4071  | 1.4227  |
| C | 3.7557  | -1.449  | -2.0564 | C | 1.8814  | 1.7394  | 2.5776  |
| O | 3.1164  | -1.5184 | 0.1793  | O | 2.1897  | 2.2139  | 0.3185  |
| C | 3.6349  | 2.6482  | 2.5112  | C | 4.844   | -0.7513 | -2.0153 |
| C | 1.4158  | 3.896   | -1.5402 | C | 2.2183  | -3.7354 | 0.8221  |
| O | 0.9349  | 4.8831  | -2.0866 | O | 2.0161  | -4.9284 | 1.0283  |
| O | -4.906  | 1.3212  | -1.4913 | O | -4.9019 | -2.4393 | 0.0209  |
| C | 3.5756  | 5.5442  | 1.1974  | C | 5.98    | -3.7084 | 0.1202  |
| H | 4.282   | -4.7702 | 2.3319  | H | 3.2459  | 6.0447  | -0.522  |
| H | 3.8458  | -3.0819 | 2.4753  | H | 3.353   | 4.3991  | -1.1093 |
| H | 4.9437  | -3.3838 | 0.3593  | H | 3.3355  | 4.3468  | 1.3     |
| H | 3.9561  | -4.7784 | -0.0519 | H | 1.9314  | 5.3993  | 1.3954  |
| H | 1.9838  | -4.4568 | 3.2566  | H | 1.7112  | 5.6318  | -2.4423 |
| H | 2.0251  | -5.439  | 1.8061  | H | 0.8854  | 6.1932  | -1.0026 |
| H | 0.4665  | -1.4698 | -0.4401 | H | -0.3967 | 1.5655  | -0.4744 |
| H | 0.5832  | -2.521  | -1.8427 | H | -1.1003 | 2.1976  | 1.0057  |
| H | -1.0913 | -4.0469 | -1.0248 | H | -2.6426 | 3.6301  | -0.1777 |
| H | -1.4956 | -2.2846 | 1.4382  | H | -1.5711 | 2.58    | -2.8381 |
| H | -2.3252 | -3.7756 | 1.0474  | H | -2.8113 | 3.797   | -2.5959 |
| H | -0.3174 | -5.1006 | 1.3035  | H | -1.2646 | 5.3917  | -1.6996 |
| H | -0.5518 | -4.1276 | 2.7394  | H | -0.6382 | 4.7943  | -3.2195 |
| H | 0.5357  | -1.3464 | 1.7659  | H | 0.6013  | 2.0704  | -2.3711 |
| H | 0.7728  | -2.2269 | 3.2719  | H | 1.2638  | 3.3485  | -3.3826 |
| H | 2.1563  | -1.6872 | 2.3517  | H | 2.1775  | 2.7585  | -2.0125 |
| H | 1.6701  | -4.7026 | -1.4998 | H | -0.6604 | 4.5333  | 1.5706  |
| H | -3.5793 | -3.6041 | -1.9126 | H | -4.3395 | 1.9282  | -2.5947 |
| H | -0.7434 | 1.494   | -2.4463 | H | -3.9423 | 0.4224  | 3.0298  |
| H | -1.5687 | 2.2934  | -3.7656 | H | -5.5404 | -0.1754 | 3.4197  |
| H | -3.4309 | 0.7745  | -3.6729 | H | -6.1635 | -0.3705 | 1.0984  |
| H | -1.9514 | -0.1751 | -3.6715 | H | -5.4714 | 1.225   | 1.3523  |
| H | -3.2974 | 3.1648  | -2.3199 | H | -5.0475 | -2.3901 | 2.6034  |
| H | -1.7396 | 3.5826  | -1.6374 | H | -3.7765 | -1.9176 | 3.713   |
| H | -4.9336 | -0.6424 | 0.2658  | H | -3.2079 | -1.7685 | -1.8873 |
| H | -3.3903 | -0.3043 | 1.0265  | H | -1.8611 | -1.3203 | -0.8576 |
| H | -5.8659 | 1.4804  | 0.8563  | H | -3.2855 | -4.0223 | -1.0674 |

|             |                  |                  |                  |              |                  |                  |                  |
|-------------|------------------|------------------|------------------|--------------|------------------|------------------|------------------|
| H           | -4.8071          | 3.2021           | 2.1527           | H            | -1.7454          | -5.0121          | 0.5025           |
| H           | -3.3301          | 2.2861           | 2.3386           | H            | -0.8626          | -3.5161          | 0.7031           |
| H           | -4.479           | 3.4653           | -0.2249          | H            | -3.7344          | -4.1018          | 1.5305           |
| H           | -3.0135          | 3.9483           | 0.6002           | H            | -2.3692          | -3.8095          | 2.5854           |
| H           | -4.8737          | -0.4304          | 4.6036           | H            | 0.6126           | -3.5789          | -2.8711          |
| H           | -7.0661          | -0.0153          | 3.9696           | H            | -0.9937          | -5.012           | -3.7328          |
| H           | -7.5102          | 0.8151           | 2.3829           | H            | -2.6496          | -5.2446          | -2.9538          |
| H           | -0.7972          | 1.154            | -0.2893          | H            | -1.9886          | -0.1796          | 2.1964           |
| H           | -1.0093          | 2.6456           | 0.5964           | H            | -1.3895          | -1.6605          | 2.9056           |
| H           | -1.7188          | 1.1536           | 1.2049           | H            | -1.066           | -1.3054          | 1.2123           |
| H           | 3.3623           | 5.8763           | -0.9167          | H            | 4.5179           | -4.9936          | 0.9754           |
| H           | 1.8658           | 5.9959           | 0.0106           | H            | 4.3875           | -4.8593          | -0.7801          |
| H           | 5.3815           | 4.7484           | 0.3883           | H            | 7.0922           | -2.215           | -0.9566          |
| H           | 5.2984           | 4.664            | 2.1388           | H            | 5.8709           | -3.0468          | -1.8996          |
| H           | 2.2504           | 1.0125           | 0.6223           | H            | 2.4823           | -0.3027          | -0.7278          |
| H           | 2.0181           | 1.3556           | -1.065           | H            | 1.8042           | -1.1153          | 0.6446           |
| H           | 4.404            | 1.0649           | -1.5606          | H            | 3.5206           | -0.2791          | 2.1598           |
| H           | 4.7405           | 0.2291           | 1.3706           | H            | 4.6614           | 1.391            | -0.1343          |
| H           | 5.975            | 0.2107           | 0.1237           | H            | 5.2298           | 1.3141           | 1.5199           |
| H           | 6.1527           | 2.2164           | 1.5632           | H            | 6.6206           | -0.031           | -0.0453          |
| H           | 5.9063           | 2.6043           | -0.132           | H            | 5.9613           | -0.968           | 1.2858           |
| H           | 4.1103           | -1.1186          | -3.0136          | H            | 1.9231           | 1.2789           | 3.5456           |
| H           | 3.3372           | 1.5955           | 2.5451           | H            | 4.236            | 0.1554           | -1.9534          |
| H           | 4.3894           | 2.7915           | 3.2933           | H            | 5.8029           | -0.459           | -2.4597          |
| H           | 2.7532           | 3.2358           | 2.7897           | H            | 4.343            | -1.4265          | -2.7194          |
| H           | 1.0789           | 2.893            | -1.823           | H            | 1.4381           | -2.9975          | 1.0408           |
| H           | -5.42            | 0.5603           | -1.8343          | H            | -5.3717          | -2.1287          | -0.7817          |
| H           | 2.9095           | 5.4035           | 2.0562           | H            | 6.6994           | -4.4997          | -0.1196          |
| H           | 3.9821           | 6.5588           | 1.2808           | H            | 6.2467           | -3.3266          | 1.1129           |
| <b>4d-9</b> | <b>X axis(Å)</b> | <b>Y axis(Å)</b> | <b>Z axis(Å)</b> | <b>4d-10</b> | <b>X axis(Å)</b> | <b>Y axis(Å)</b> | <b>Z axis(Å)</b> |
| C           | 2.2856           | 4.8993           | 0.166            | C            | -2.7772          | 4.9066           | -0.4927          |
| C           | 1.9157           | 4.1053           | 1.4185           | C            | -2.2065          | 4.1018           | -1.6629          |
| C           | 1.0155           | 2.8966           | 1.1115           | C            | -1.4201          | 2.8661           | -1.1981          |
| C           | -0.2383          | 3.3143           | 0.2896           | C            | -0.321           | 3.2566           | -0.1682          |
| C           | 0.1676           | 4.0574           | -1.0345          | C            | -0.9454          | 3.9892           | 1.0766           |
| C           | 1.0646           | 5.2749           | -0.6787          | C            | -1.7316          | 5.2346           | 0.5802           |
| C           | -1.205           | 2.1506           | -0.0228          | C            | 0.5707           | 2.0799           | 0.2832           |
| C           | -2.4797          | 2.6306           | -0.7606          | C            | 1.6876           | 2.5414           | 1.2462           |
| C           | -2.1303          | 3.456            | -2.0135          | C            | 1.1143           | 3.3021           | 2.4521           |
| C           | -1.1213          | 4.573            | -1.7317          | C            | 0.2021           | 4.4558           | 2.0174           |
| C           | 0.9323           | 3.1709           | -2.0528          | C            | -1.9065          | 3.1096           | 1.9202           |
| C           | 0.6352           | 2.2139           | 2.4049           | C            | -0.8303          | 2.1407           | -2.387           |
| O           | -0.1336          | 2.6498           | 3.2508           | O            | 0.0489           | 2.5698           | -3.1216          |
| O           | -0.9907          | 4.2719           | 1.0815           | O            | 0.5665           | 4.2139           | -0.806           |
| C           | -3.4131          | 1.4685           | -1.0347          | C            | 2.5733           | 1.3706           | 1.5969           |
| O           | -3.6906          | 0.6576           | 0.0652           | O            | 3.4355           | 0.9758           | 0.5765           |
| C           | -4.0035          | 1.1443           | -2.184           | C            | 2.638            | 0.6926           | 2.7406           |

|   |         |         |         |   |         |         |         |
|---|---------|---------|---------|---|---------|---------|---------|
| C | -5.9058 | -0.5048 | 1.843   | C | 6.39    | 0.5218  | -0.1465 |
| C | -5.9698 | -0.1344 | 0.3605  | C | 5.7014  | 0.3521  | 1.2081  |
| C | -4.6304 | -0.3523 | -0.3591 | C | 4.2411  | -0.1099 | 1.0786  |
| C | -4.0983 | -1.7998 | -0.1417 | C | 4.1252  | -1.3886 | 0.1987  |
| C | -3.952  | -2.1266 | 1.3904  | C | 4.756   | -1.1543 | -1.225  |
| C | -5.3238 | -1.9017 | 2.085   | C | 6.2326  | -0.7031 | -1.053  |
| C | -2.78   | -2.1042 | -0.8885 | C | 2.6846  | -1.9327 | 0.0683  |
| C | -2.324  | -3.5674 | -0.683  | C | 2.63    | -3.2245 | -0.7801 |
| C | -2.2586 | -3.9683 | 0.8002  | C | 3.3196  | -3.0743 | -2.1453 |
| C | -3.5469 | -3.6189 | 1.5527  | C | 4.7304  | -2.4914 | -2.0171 |
| C | -1.0367 | -3.8788 | -1.4207 | C | 1.2251  | -3.7747 | -0.9065 |
| C | 0.2216  | -3.1666 | -1.0701 | C | 0.1478  | -2.968  | -1.5461 |
| C | -0.9592 | -4.787  | -2.4078 | C | 0.8752  | -4.9893 | -0.4506 |
| O | 0.2873  | -2.3058 | -0.2016 | O | 0.3339  | -1.863  | -2.0432 |
| C | -2.8856 | -1.2709 | 2.1251  | C | 4.0174  | -0.0917 | -2.0825 |
| C | -4.7748 | -0.0357 | -1.8288 | C | 3.65    | -0.3133 | 2.4551  |
| O | -5.415  | -0.6849 | -2.6449 | O | 3.9399  | -1.2071 | 3.2391  |
| C | 6.75    | -1.9677 | -1.6248 | C | -5.0614 | -3.9135 | 1.7356  |
| C | 5.8424  | -0.8668 | -1.1249 | C | -4.0139 | -2.926  | 1.2961  |
| C | 5.1326  | -0.9429 | 0.0284  | C | -4.2725 | -1.7809 | 0.6238  |
| C | 5.1677  | -2.2108 | 0.9075  | C | -5.7022 | -1.4213 | 0.1864  |
| C | 5.8175  | -3.4185 | 0.1766  | C | -6.6738 | -2.6282 | 0.3209  |
| C | 4.243   | 0.163   | 0.5855  | C | -3.2216 | -0.736  | 0.2649  |
| C | 2.8106  | -0.3238 | 0.8843  | C | -3.2578 | -0.3387 | -1.2239 |
| C | 2.8593  | -1.5196 | 1.8485  | C | -4.6752 | 0.0741  | -1.65   |
| C | 3.7255  | -2.6441 | 1.2838  | C | -5.7016 | -1.0034 | -1.3063 |
| C | 1.948   | 0.822   | 1.3657  | C | -2.3024 | 0.7879  | -1.5309 |
| C | 1.2994  | 0.9272  | 2.5245  | C | -1.4385 | 0.8289  | -2.5432 |
| O | 1.7956  | 1.8715  | 0.4578  | O | -2.3476 | 1.8881  | -0.6808 |
| C | 5.9813  | -1.9177 | 2.1903  | C | -6.2332 | -0.2627 | 1.0628  |
| C | 5.8218  | 0.3229  | -2.0346 | C | -2.6358 | -3.3251 | 1.6944  |
| O | 6.4127  | 0.3416  | -3.1097 | O | -1.6944 | -3.3533 | 0.9126  |
| O | -5.0867 | -2.7253 | -0.6697 | O | 4.9045  | -2.4391 | 0.8316  |
| C | 7.0759  | -3.0255 | -0.5786 | C | -6.4854 | -3.3804 | 1.6309  |
| H | 2.8115  | 5.8145  | 0.4632  | H | -3.2039 | 5.8417  | -0.8748 |
| H | 2.9986  | 4.3243  | -0.4352 | H | -3.6126 | 4.3562  | -0.0455 |
| H | 2.8437  | 3.7766  | 1.9038  | H | -3.0384 | 3.8011  | -2.3127 |
| H | 1.4158  | 4.7765  | 2.1287  | H | -1.5637 | 4.7559  | -2.2656 |
| H | 1.4044  | 5.7742  | -1.595  | H | -2.2296 | 5.7276  | 1.4248  |
| H | 0.4801  | 6.0231  | -0.1275 | H | -1.0356 | 5.9764  | 0.1673  |
| H | -0.7034 | 1.3647  | -0.5995 | H | -0.0295 | 1.2875  | 0.7456  |
| H | -1.5196 | 1.6867  | 0.9207  | H | 1.0538  | 1.6299  | -0.594  |
| H | -3.0278 | 3.2973  | -0.0798 | H | 2.3308  | 3.2539  | 0.7096  |
| H | -1.7355 | 2.8024  | -2.8009 | H | 0.558   | 2.6243  | 3.1098  |
| H | -3.0419 | 3.9103  | -2.4226 | H | 1.935   | 3.71    | 3.0558  |
| H | -1.6091 | 5.3385  | -1.1146 | H | 0.8139  | 5.2201  | 1.5209  |
| H | -0.8679 | 5.0708  | -2.6766 | H | -0.2121 | 4.9398  | 2.9111  |

|              |                  |                  |                  |              |                  |                  |                  |
|--------------|------------------|------------------|------------------|--------------|------------------|------------------|------------------|
| H            | 0.3995           | 2.2475           | -2.2938          | H            | -1.4649          | 2.149            | 2.1981           |
| H            | 1.0779           | 3.7116           | -2.996           | H            | -2.1752          | 3.6217           | 2.8523           |
| H            | 1.9287           | 2.8844           | -1.7108          | H            | -2.8502          | 2.8949           | 1.4151           |
| H            | -1.1712          | 3.8738           | 1.9596           | H            | 0.8972           | 3.8173           | -1.6402          |
| H            | -3.9615          | 1.5946           | -3.1568          | H            | 2.091            | 0.7922           | 3.6576           |
| H            | -5.3176          | 0.246            | 2.3822           | H            | 5.9971           | 1.4137           | -0.647           |
| H            | -6.9154          | -0.4585          | 2.2684           | H            | 7.4575           | 0.7136           | 0.0151           |
| H            | -6.7583          | -0.7273          | -0.1205          | H            | 6.2723           | -0.368           | 1.8083           |
| H            | -6.279           | 0.9156           | 0.2803           | H            | 5.7523           | 1.3096           | 1.7423           |
| H            | -6.0498          | -2.6441          | 1.7287           | H            | 6.8283           | -1.5235          | -0.6319          |
| H            | -5.2308          | -2.0669          | 3.166            | H            | 6.676            | -0.4813          | -2.0321          |
| H            | -2.9223          | -1.958           | -1.9673          | H            | 2.2902           | -2.179           | 1.0629           |
| H            | -2.0027          | -1.3976          | -0.5827          | H            | 2.0261           | -1.1607          | -0.3408          |
| H            | -3.1065          | -4.1999          | -1.1284          | H            | 3.2175           | -3.9759          | -0.2313          |
| H            | -2.0862          | -5.0493          | 0.8809           | H            | 3.3877           | -4.0554          | -2.6328          |
| H            | -1.4079          | -3.4929          | 1.3001           | H            | 2.7262           | -2.4471          | -2.8192          |
| H            | -4.3518          | -4.273           | 1.1934           | H            | 5.3754           | -3.2344          | -1.5306          |
| H            | -3.4169          | -3.8639          | 2.6147           | H            | 5.1487           | -2.3465          | -3.0215          |
| H            | 1.1153           | -3.4581          | -1.6478          | H            | -0.8518          | -3.4341          | -1.5664          |
| H            | -0.0363          | -5.0073          | -2.936           | H            | -0.1392          | -5.3698          | -0.5265          |
| H            | -1.8367          | -5.3469          | -2.7209          | H            | 1.5998           | -5.6365          | 0.0342           |
| H            | -3.1695          | -0.2215          | 2.2248           | H            | 4.1343           | 0.9255           | -1.7039          |
| H            | -2.7353          | -1.6416          | 3.1464           | H            | 4.4157           | -0.081           | -3.1045          |
| H            | -1.9111          | -1.2937          | 1.6304           | H            | 2.9439           | -0.2828          | -2.1597          |
| H            | 6.2669           | -2.4485          | -2.4853          | H            | -4.9674          | -4.8132          | 1.1139           |
| H            | 7.6992           | -1.5493          | -1.9818          | H            | -4.8843          | -4.2239          | 2.7725           |
| H            | 5.1098           | -3.852           | -0.5435          | H            | -6.5149          | -3.336           | -0.5044          |
| H            | 6.0518           | -4.2178          | 0.891            | H            | -7.7149          | -2.292           | 0.237            |
| H            | 4.7028           | 0.5546           | 1.5024           | H            | -3.4036          | 0.1437           | 0.896            |
| H            | 4.182            | 1.0197           | -0.0873          | H            | -2.2065          | -1.0557          | 0.5167           |
| H            | 2.3713           | -0.6715          | -0.0611          | H            | -2.9679          | -1.2197          | -1.8142          |
| H            | 3.245            | -1.2122          | 2.8281           | H            | -4.9617          | 1.0227           | -1.1791          |
| H            | 1.8484           | -1.9086          | 2.0217           | H            | -4.7001          | 0.2528           | -2.7328          |
| H            | 3.7582           | -3.4669          | 2.0095           | H            | -6.6993          | -0.6508          | -1.5979          |
| H            | 3.217            | -3.0413          | 0.3944           | H            | -5.4902          | -1.8797          | -1.9349          |
| H            | 1.2287           | 0.2612           | 3.3626           | H            | -1.2142          | 0.1093           | -3.3073          |
| H            | 5.5254           | -1.1382          | 2.8084           | H            | -7.2657          | -0.0105          | 0.7946           |
| H            | 6.0631           | -2.8141          | 2.8159           | H            | -6.2213          | -0.5221          | 2.1271           |
| H            | 6.9979           | -1.5829          | 1.9569           | H            | -5.6426          | 0.6524           | 0.955            |
| H            | 5.2463           | 1.1974           | -1.7083          | H            | -2.5313          | -3.6496          | 2.7433           |
| H            | -5.3087          | -2.4539          | -1.5853          | H            | 4.6124           | -2.5198          | 1.7637           |
| H            | 7.8381           | -2.6488          | 0.113            | H            | -6.7048          | -2.7269          | 2.4829           |
| H            | 7.5081           | -3.9052          | -1.0694          | H            | -7.194           | -4.2148          | 1.6883           |
| <b>4d-11</b> | <b>X axis(Å)</b> | <b>Y axis(Å)</b> | <b>Z axis(Å)</b> | <b>4d-12</b> | <b>X axis(Å)</b> | <b>Y axis(Å)</b> | <b>Z axis(Å)</b> |
| C            | 2.6209           | 5.1036           | 0.5025           | C            | -4.0516          | -4.3576          | 0.3278           |
| C            | 2.1326           | 4.2406           | 1.667            | C            | -3.3265          | -3.8152          | 1.5606           |
| C            | 1.3827           | 2.9826           | 1.1997           | C            | -2.2798          | -2.7475          | 1.2146           |

|   |         |         |         |   |         |         |         |
|---|---------|---------|---------|---|---------|---------|---------|
| C | 0.2325  | 3.3433  | 0.2154  | C | -1.2929 | -3.2461 | 0.1141  |
| C | 0.7801  | 4.1423  | -1.0251 | C | -2.0674 | -3.6981 | -1.1782 |
| C | 1.5196  | 5.4111  | -0.518  | C | -3.0949 | -4.7954 | -0.7872 |
| C | -0.6058 | 2.1312  | -0.2473 | C | -0.1907 | -2.2264 | -0.2482 |
| C | -1.7673 | 2.5497  | -1.1777 | C | 0.7941  | -2.7632 | -1.3075 |
| C | -1.2765 | 3.3924  | -2.3661 | C | 0.0659  | -3.3023 | -2.5506 |
| C | -0.4186 | 4.5789  | -1.9139 | C | -1.0479 | -4.2924 | -2.1905 |
| C | 1.7561  | 3.3357  | -1.9234 | C | -2.8291 | -2.5555 | -1.902  |
| C | 0.8764  | 2.2127  | 2.4001  | C | -1.5394 | -2.3206 | 2.4636  |
| O | -0.0547 | 2.5377  | 3.1239  | O | -0.8534 | -3.0427 | 3.1737  |
| O | -0.6865 | 4.2302  | 0.9051  | O | -0.6114 | -4.4243 | 0.6187  |
| C | -2.5666 | 1.3301  | -1.5703 | C | 1.8359  | -1.7067 | -1.6005 |
| O | -3.5113 | 0.9209  | -0.6303 | O | 2.7754  | -1.5182 | -0.5867 |
| C | -2.4752 | 0.6158  | -2.6902 | C | 1.9593  | -0.9487 | -2.6889 |
| C | -6.5156 | 0.2644  | -0.2256 | C | 5.7888  | -1.6335 | -0.0096 |
| C | -5.6577 | 0.1217  | -1.4821 | C | 5.0805  | -1.2456 | -1.3074 |
| C | -4.1942 | -0.2304 | -1.1737 | C | 3.7322  | -0.5481 | -1.0601 |
| C | -4.0833 | -1.4669 | -0.2339 | C | 3.8911  | 0.6672  | -0.0988 |
| C | -4.9036 | -1.2494 | 1.0917  | C | 4.5459  | 0.2312  | 1.2645  |
| C | -6.378  | -0.9281 | 0.7252  | C | 5.904   | -0.4657 | 0.9743  |
| C | -2.6278 | -1.8617 | 0.1004  | C | 2.5832  | 1.4521  | 0.1567  |
| C | -2.5478 | -3.1107 | 1.0087  | C | 2.8187  | 2.6795  | 1.069   |
| C | -3.4426 | -3.0111 | 2.2556  | C | 3.5466  | 2.3213  | 2.3756  |
| C | -4.8685 | -2.5613 | 1.9244  | C | 4.8126  | 1.4964  | 2.1271  |
| C | -1.1119 | -3.4288 | 1.3721  | C | 1.554   | 3.477   | 1.3212  |
| C | -0.3011 | -2.3931 | 2.074   | C | 0.4156  | 2.8722  | 2.0634  |
| C | -0.5131 | -4.5921 | 1.0728  | C | 1.3971  | 4.7485  | 0.915   |
| O | 0.9237  | -2.3504 | 2.0451  | O | 0.4093  | 1.7195  | 2.4756  |
| C | -4.3663 | -0.1063 | 1.9943  | C | 3.6706  | -0.7344 | 2.1069  |
| C | -3.4483 | -0.4418 | -2.4712 | C | 3.1276  | -0.1393 | -2.3832 |
| O | -3.5916 | -1.3846 | -3.2372 | O | 3.5408  | 0.7531  | -3.1124 |
| C | 4.8561  | -4.1031 | -1.3483 | C | -2.2975 | 4.7753  | -1.7918 |
| C | 3.8268  | -3.0829 | -0.9195 | C | -1.9357 | 3.3892  | -1.3255 |
| C | 4.1315  | -1.8095 | -0.567  | C | -2.7706 | 2.5797  | -0.6311 |
| C | 5.5945  | -1.3187 | -0.5216 | C | -4.2213 | 2.9918  | -0.3295 |
| C | 6.6122  | -2.4893 | -0.6177 | C | -4.4245 | 4.5238  | -0.4879 |
| C | 3.1172  | -0.7367 | -0.1893 | C | -2.3871 | 1.1908  | -0.1457 |
| C | 3.4305  | -0.0921 | 1.172   | C | -2.8212 | 0.8937  | 1.3041  |
| C | 4.8534  | 0.4807  | 1.1851  | C | -4.3095 | 1.1787  | 1.5079  |
| C | 5.8769  | -0.5941 | 0.823   | C | -4.6244 | 2.6242  | 1.123   |
| C | 2.4257  | 0.9777  | 1.5132  | C | -2.4679 | -0.5228 | 1.6745  |
| C | 1.6261  | 0.9803  | 2.577   | C | -1.6819 | -0.8904 | 2.6841  |
| O | 2.3233  | 2.0462  | 0.6282  | O | -2.9431 | -1.5226 | 0.8318  |
| C | 5.8455  | -0.3517 | -1.7029 | C | -5.1545 | 2.2577  | -1.3231 |
| C | 2.4308  | -3.6233 | -0.9366 | C | -0.571  | 2.9684  | -1.7778 |
| O | 2.1721  | -4.7764 | -1.2684 | O | -0.2702 | 1.8258  | -2.098  |
| O | -4.6766 | -2.6067 | -0.9041 | O | 4.8123  | 1.6084  | -0.7171 |

|   |         |         |         |   |         |         |         |
|---|---------|---------|---------|---|---------|---------|---------|
| C | 6.2198  | -3.5079 | -1.6745 | C | -3.7929 | 5.0686  | -1.7619 |
| H | 3.0178  | 6.0468  | 0.8966  | H | -4.6716 | -5.2124 | 0.6238  |
| H | 3.4632  | 4.6067  | 0.0086  | H | -4.747  | -3.5996 | -0.0491 |
| H | 3.0018  | 3.9625  | 2.2768  | H | -4.0753 | -3.4026 | 2.2487  |
| H | 1.4841  | 4.8478  | 2.3116  | H | -2.8504 | -4.6532 | 2.0857  |
| H | 1.9591  | 5.9552  | -1.3639 | H | -3.6829 | -5.0919 | -1.6653 |
| H | 0.8032  | 6.1025  | -0.0554 | H | -2.5696 | -5.7011 | -0.4574 |
| H | 0.0281  | 1.3844  | -0.7399 | H | -0.6313 | -1.2862 | -0.5962 |
| H | -1.0457 | 1.6338  | 0.6273  | H | 0.3907  | -1.9843 | 0.6512  |
| H | -2.4493 | 3.1941  | -0.6043 | H | 1.3334  | -3.6158 | -0.8703 |
| H | -0.7027 | 2.7786  | -3.0697 | H | -0.3593 | -2.4811 | -3.1388 |
| H | -2.1389 | 3.7733  | -2.9279 | H | 0.7861  | -3.8053 | -3.2084 |
| H | -1.0563 | 5.2894  | -1.3723 | H | -0.5925 | -5.2045 | -1.784  |
| H | -0.0583 | 5.117   | -2.8    | H | -1.562  | -4.6001 | -3.1101 |
| H | 1.3502  | 2.3663  | -2.2239 | H | -2.1921 | -1.6942 | -2.1188 |
| H | 1.9768  | 3.891   | -2.8433 | H | -3.2272 | -2.9093 | -2.861  |
| H | 2.7211  | 3.1448  | -1.4498 | H | -3.6872 | -2.1837 | -1.3389 |
| H | -0.9578 | 3.8049  | 1.746   | H | -0.2161 | -4.2079 | 1.4889  |
| H | -1.8366 | 0.714   | -3.5466 | H | 1.3667  | -0.8822 | -3.5804 |
| H | -6.2544 | 1.1936  | 0.2925  | H | 5.2614  | -2.4713 | 0.4595  |
| H | -7.567  | 0.3696  | -0.519  | H | 6.7935  | -2.0041 | -0.2456 |
| H | -6.1009 | -0.6507 | -2.1241 | H | 5.7419  | -0.593  | -1.8917 |
| H | -5.7125 | 1.0621  | -2.0453 | H | 4.936   | -2.1547 | -1.9052 |
| H | -6.847  | -1.8024 | 0.2555  | H | 6.6176  | 0.2612  | 0.5647  |
| H | -6.9582 | -0.7275 | 1.6349  | H | 6.3487  | -0.8297 | 1.9093  |
| H | -2.0873 | -2.098  | -0.8259 | H | 2.1908  | 1.8281  | -0.7962 |
| H | -2.1012 | -1.0156 | 0.5549  | H | 1.8148  | 0.7907  | 0.5688  |
| H | -2.9363 | -3.9536 | 0.4182  | H | 3.5045  | 3.3424  | 0.5202  |
| H | -3.488  | -3.9894 | 2.7515  | H | 3.825   | 3.2416  | 2.9052  |
| H | -3.0128 | -2.3258 | 2.9945  | H | 2.8875  | 1.7731  | 3.0571  |
| H | -5.3771 | -3.3704 | 1.3847  | H | 5.5597  | 2.1376  | 1.6417  |
| H | -5.427  | -2.4317 | 2.8604  | H | 5.2481  | 1.2123  | 3.0937  |
| H | -0.8823 | -1.6297 | 2.616   | H | -0.4533 | 3.5328  | 2.2254  |
| H | 0.5239  | -4.7913 | 1.3332  | H | 0.4963  | 5.3229  | 1.1085  |
| H | -1.037  | -5.3837 | 0.5457  | H | 2.1903  | 5.2622  | 0.3775  |
| H | -4.4944 | 0.8853  | 1.5562  | H | 3.5694  | -1.725  | 1.6594  |
| H | -4.9052 | -0.089  | 2.9496  | H | 4.1187  | -0.8926 | 3.0955  |
| H | -3.3044 | -0.2155 | 2.2292  | H | 2.6596  | -0.353  | 2.2718  |
| H | 4.9676  | -4.8399 | -0.5423 | H | -1.7767 | 5.4974  | -1.1497 |
| H | 4.5106  | -4.6477 | -2.2356 | H | -1.9346 | 4.9408  | -2.8138 |
| H | 6.684   | -3.0101 | 0.3471  | H | -3.9794 | 5.0519  | 0.3667  |
| H | 7.6179  | -2.1062 | -0.8315 | H | -5.494  | 4.7694  | -0.4768 |
| H | 3.1162  | 0.0259  | -0.9792 | H | -2.8309 | 0.4627  | -0.8361 |
| H | 2.0921  | -1.1096 | -0.1623 | H | -1.3047 | 1.0379  | -0.1823 |
| H | 3.3781  | -0.8782 | 1.939   | H | -2.2666 | 1.5733  | 1.9651  |
| H | 4.9412  | 1.3262  | 0.4919  | H | -4.9267 | 0.4846  | 0.9255  |
| H | 5.0884  | 0.8753  | 2.1819  | H | -4.5796 | 1.0231  | 2.5601  |



|   |         |         |         |   |         |        |         |
|---|---------|---------|---------|---|---------|--------|---------|
| H | 6.8768  | -0.1417 | 0.8031  | H | -5.6963 | 2.8069 | 1.2729  |
| H | 5.8899  | -1.3286 | 1.6403  | H | -4.1002 | 3.2835 | 1.8287  |
| H | 1.5173  | 0.2668  | 3.3714  | H | -1.1706 | -0.306 | 3.4255  |
| H | 5.2313  | 0.5522  | -1.6444 | H | -4.9009 | 2.4838 | -2.3645 |
| H | 6.8916  | -0.0251 | -1.7268 | H | -5.1013 | 1.1691 | -1.2187 |
| H | 5.6239  | -0.8241 | -2.6662 | H | -6.1997 | 2.5482 | -1.1666 |
| H | 1.6251  | -2.9431 | -0.638  | H | 0.1609  | 3.7909 | -1.847  |
| H | -4.2929 | -2.6811 | -1.8037 | H | 4.5081  | 1.775  | -1.6347 |
| H | 6.2004  | -3.0442 | -2.6674 | H | -4.2763 | 4.6341 | -2.6442 |
| H | 6.9676  | -4.3082 | -1.719  | H | -3.9542 | 6.1512 | -1.8242 |

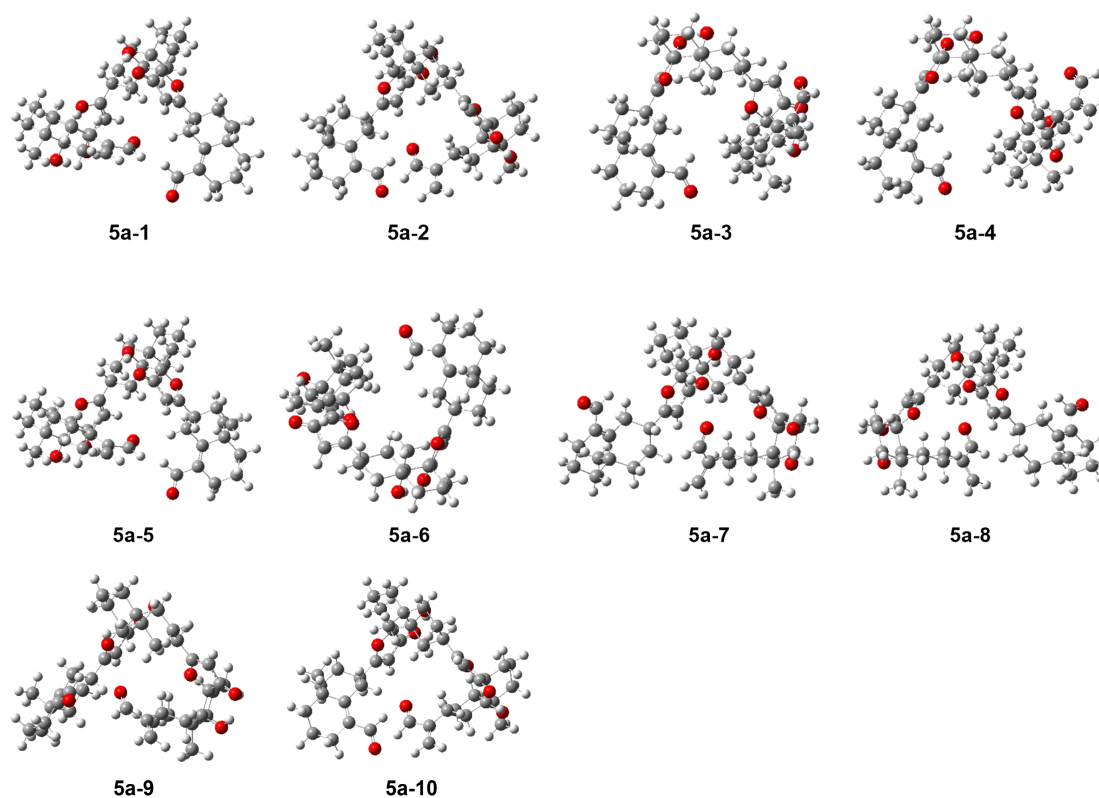

**Figure S26.** Optimized geometries of predominant conformers for **5a** at the B3LYP/6-31G (d,p) level

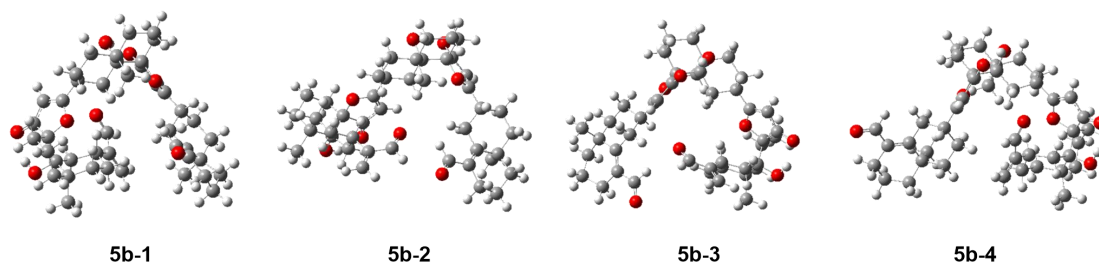

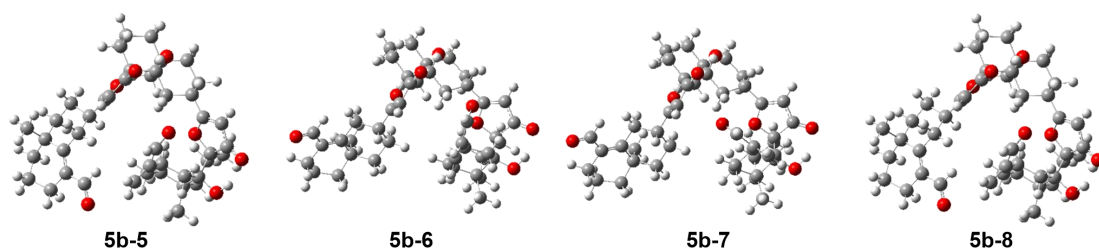

**Figure S27.** Optimized geometries of predominant conformers for **5b** at the B3LYP/6-31G (d,p) level

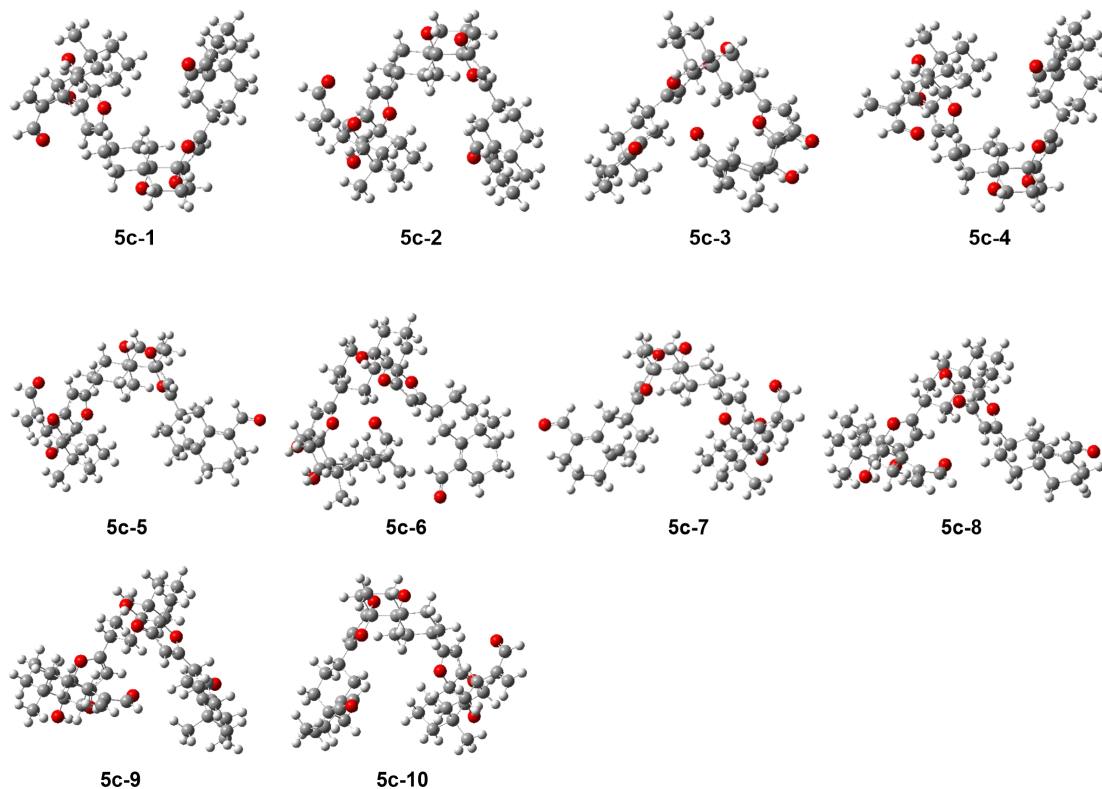

**Figure S28.** Optimized geometries of predominant conformers for **5c** at the B3LYP/6-31G (d,p) level

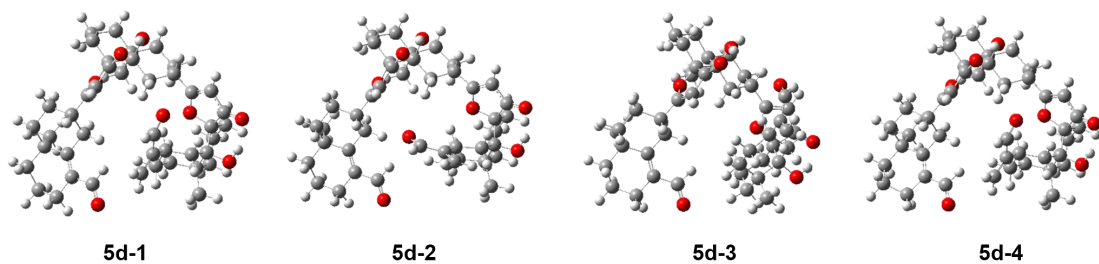

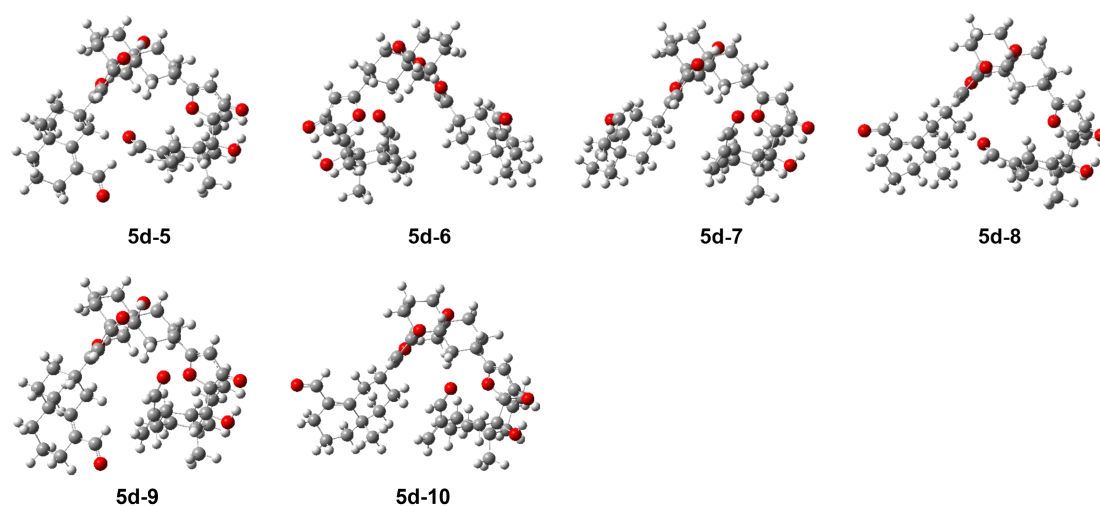

**Figure S29.** Optimized geometries of predominant conformers for **5d** at the B3LYP/6-31G (d,p) level

**Table S10.** Conformational analysis of the optimized **5a-5d** at the B3LYP/6-31G(d,p) level in the gas phase

|    | <i>Conformers</i> | G (Hartree) | $\Delta G$ (Kcal/mol) | Population |
|----|-------------------|-------------|-----------------------|------------|
| 5a | 5a-1              | -2273.32755 | 0                     | 26.11%     |
|    | 5a-2              | -2273.32296 | 2.88215343            | 0.20%      |
|    | 5a-3              | -2273.32577 | 1.11571278            | 3.97%      |
|    | 5a-4              | -2273.32732 | 0.14369979            | 20.49%     |
|    | 5a-5              | -2273.32569 | 1.16905113            | 3.63%      |
|    | 5a-6              | -2273.32610 | 0.9098895             | 5.62%      |
|    | 5a-7              | -2273.32719 | 0.22464858            | 17.87%     |
|    | 5a-8              | -2273.32721 | 0.21147087            | 18.27%     |
|    | 5a-9              | -2273.32573 | 1.13955816            | 3.81%      |
|    | 5a-10             | -2273.32151 | 3.78953289            | 0.04%      |
|    | <i>Conformers</i> | G (Hartree) | $\Delta G$ (Kcal/mol) | Population |
| 5b | 5b-1              | -2273.32493 | 1.72188744            | 1.77%      |
|    | 5b-2              | -2273.32768 | 0                     | 32.35%     |
|    | 5b-3              | -2273.32663 | 0.65951301            | 10.62%     |
|    | 5b-4              | -2273.32671 | 0.6086847             | 11.57%     |
|    | 5b-5              | -2273.32621 | 0.91867464            | 6.86%      |
|    | 5b-6              | -2273.32710 | 0.36521082            | 17.46%     |
|    | 5b-7              | -2273.32679 | 0.55911141            | 12.58%     |

|    |                   |             |                       |            |
|----|-------------------|-------------|-----------------------|------------|
|    | 5b-8              | -2273.32621 | 0.92369472            | 6.80%      |
|    | <i>Conformers</i> | G (Hartree) | $\Delta G$ (Kcal/mol) | Population |
| 5c | 5c-1              | -2273.32758 | 0.39282126            | 0.12888    |
|    | 5c-2              | -2273.32759 | 0.38968371            | 0.12956    |
|    | 5c-3              | -2273.32541 | 1.75514547            | 0.01291    |
|    | 5c-4              | -2273.32730 | 0.56852406            | 0.09579    |
|    | 5c-5              | -2273.32820 | 0.00376506            | 0.2486     |
|    | 5c-6              | -2273.32636 | 1.15712844            | 0.03545    |
|    | 5c-7              | -2273.32821 | 0                     | 0.25019    |
|    | 5c-8              | -2273.32672 | 0.93624492            | 0.05148    |
|    | 5c-9              | -2273.32610 | 1.32467361            | 0.02672    |
|    | 5c-10             | -2273.32584 | 1.48406115            | 0.02041    |
|    | <i>Conformers</i> | G (Hartree) | $\Delta G$ (Kcal/mol) | Population |
| 5d | 5d-1              | -2273.32413 | 1.72753503            | 0.01842    |
|    | 5d-2              | -2273.32519 | 1.06551198            | 0.05633    |
|    | 5d-3              | -2273.32572 | 0.73355919            | 0.09866    |
|    | 5d-4              | -2273.32341 | 2.18436231            | 0.00852    |
|    | 5d-5              | -2273.32368 | 2.00991453            | 0.01143    |
|    | 5d-6              | -2273.32689 | 0.00062751            | 0.34015    |
|    | 5d-7              | -2273.32689 | 0                     | 0.34051    |
|    | 5d-8              | -2273.32471 | 1.36420674            | 0.03401    |
|    | 5d-9              | -2273.32413 | 1.72816254            | 0.0184     |
|    | 5d-10             | -2273.32544 | 0.90737946            | 0.07357    |

| Functional |      | Solvent?     |           | Basis Set     |           |           | Type of Data    |
|------------|------|--------------|-----------|---------------|-----------|-----------|-----------------|
| mPW1PW91   |      | PCM          |           | 6-311+G(d, p) |           |           | Unscaled Shifts |
|            |      | DP4+         | 0.00%     | 100.00%       | 0.00%     | 0.00%     | -               |
| Nuclei     | sp2? | Experimental | Isomer 1  | Isomer 2      | Isomer 3  | Isomer 4  | Isomer 5        |
| C          |      | 18.3         | 21.55607  | 21.82157      | 21.94932  | 21.59465  |                 |
| C          |      | 31.3         | 36.246    | 36.36782      | 36.04792  | 36.33177  |                 |
| C          |      | 92           | 98.69048  | 98.46936      | 98.69253  | 98.6618   |                 |
| C          |      | 75.4         | 81.87816  | 81.95582      | 81.72346  | 81.84974  |                 |
| C          |      | 37.6         | 42.64005  | 42.60591      | 42.62287  | 42.52195  |                 |
| C          |      | 34.1         | 36.55098  | 36.69831      | 36.57469  | 36.82871  |                 |
| C          |      | 31.3         | 35.23173  | 32.78495      | 35.5436   | 32.88309  |                 |
| C          |      | 36.1         | 41.33967  | 41.56197      | 41.61825  | 41.6875   |                 |
| C          |      | 24.9         | 27.26463  | 29.04145      | 26.99847  | 29.74543  |                 |
| C          |      | 36.2         | 38.03185  | 38.57211      | 38.00868  | 38.52104  |                 |
| C          |      | 20.5         | 21.05673  | 21.05256      | 21.12924  | 21.01376  |                 |
| C          | x    | 209.5        | 219.76383 | 219.72898     | 219.76727 | 219.45918 |                 |
| C          | x    | 196.4        | 210.24603 | 209.64999     | 209.04615 | 209.1008  |                 |
| C          | x    | 102.3        | 108.81501 | 108.79838     | 109.23918 | 109.63201 |                 |
| C          |      | 18.5         | 21.93447  | 22.0267       | 22.22221  | 21.84011  |                 |
| C          |      | 33           | 37.49785  | 37.12982      | 37.48782  | 37.51751  |                 |
| C          |      | 93.2         | 100.6201  | 101.02182     | 100.59036 | 101.50714 |                 |
| C          |      | 74.9         | 81.06317  | 81.09058      | 81.2752   | 81.19902  |                 |
| C          |      | 37.9         | 43.10681  | 43.01961      | 42.79934  | 43.04095  |                 |
| C          |      | 36.5         | 38.55219  | 38.64146      | 38.80975  | 38.67102  |                 |
| C          |      | 39.2         | 42.31939  | 42.32394      | 42.02892  | 43.00614  |                 |
| C          |      | 32.8         | 37.00575  | 36.32004      | 37.07622  | 36.5374   |                 |
| C          |      | 26.1         | 26.57447  | 27.46567      | 26.52118  | 26.94698  |                 |
| C          |      | 33           | 34.98498  | 35.35867      | 35.16265  | 35.16356  |                 |
| C          | x    | 155.1        | 163.65337 | 163.78709     | 163.51283 | 163.88008 |                 |
| C          | x    | 194.9        | 205.95272 | 206.73378     | 205.90891 | 205.56136 |                 |
| C          | x    | 133.6        | 146.92233 | 146.59425     | 146.42563 | 146.68358 |                 |
| C          |      | 23.6         | 23.4849   | 23.48257      | 23.49751  | 23.48049  |                 |
| C          | x    | 210.6        | 219.90321 | 219.86677     | 220.43652 | 220.24413 |                 |
| C          |      | 24.7         | 27.35717  | 27.42038      | 27.48137  | 27.42022  |                 |
| C          | x    | 134.4        | 141.97974 | 141.99707     | 141.82783 | 141.85327 |                 |
| C          | x    | 160.1        | 178.20808 | 178.10343     | 178.24145 | 178.29149 |                 |
| C          |      | 36.9         | 43.02426  | 42.97189      | 43.12577  | 43.10683  |                 |
| C          |      | 39.7         | 41.53099  | 41.72881      | 41.55168  | 41.59056  |                 |
| C          |      | 26.9         | 30.72313  | 31.34156      | 31.05132  | 31.09181  |                 |
| C          |      | 41.6         | 46.98801  | 47.25335      | 47.11677  | 46.55886  |                 |
| C          |      | 26.1         | 28.11746  | 28.39491      | 27.77094  | 27.61689  |                 |
| C          |      | 40.9         | 43.93483  | 44.147        | 43.96939  | 43.79322  |                 |
| C          | x    | 196.4        | 207.46617 | 207.69633     | 207.56607 | 207.62454 |                 |
| C          | x    | 102.3        | 108.30978 | 108.30034     | 108.43877 | 107.70642 |                 |
| C          |      | 25           | 26.48507  | 26.46756      | 26.42021  | 26.51846  |                 |
| C          | x    | 190.8        | 199.79571 | 200.245       | 198.82542 | 198.95854 |                 |
| C          |      | 18.3         | 21.07971  | 20.97377      | 20.93372  | 20.93665  |                 |
| H          | x    | 9.5          | 9.63468   | 9.84476       | 9.70147   | 9.62404   |                 |
| H          |      | 1.96         | 1.57484   | 1.9384        | 1.59529   | 1.99945   |                 |
| H          |      | 1.56         | 2.0164    | 1.63356       | 2.01212   | 1.5941    |                 |
| H          |      | 2.5          | 1.46262   | 2.30154       | 1.45585   | 2.27433   |                 |
| H          |      | 1.5          | 2.26127   | 1.44309       | 2.29886   | 1.40482   |                 |
| H          |      | 2.14         | 1.19166   | 2.09986       | 1.16997   | 2.13617   |                 |
| H          |      | 1.14         | 2.12863   | 1.15192       | 2.10519   | 1.18695   |                 |
| H          |      | 1.79         | 1.97342   | 1.43671       | 2.05902   | 1.38791   |                 |
| H          |      | 2.22         | 1.34408   | 2.15866       | 1.11719   | 1.90461   |                 |
| H          |      | 3.64         | 3.39684   | 3.57022       | 3.55441   | 3.6924    |                 |
| H          |      | 1.98         | 1.9706    | 1.76344       | 2.00091   | 1.58432   |                 |
| H          |      | 2.02         | 1.72863   | 2.01206       | 1.76049   | 2.05487   |                 |
| H          |      | 1.2          | 2.11941   | 1.19481       | 2.08436   | 1.20027   |                 |
| H          |      | 2.27         | 1.20109   | 2.15654       | 1.16345   | 2.13385   |                 |

|   |   |       |          |          |          |          |  |
|---|---|-------|----------|----------|----------|----------|--|
| H |   | 1.42  | 1.5839   | 1.60003  | 1.63142  | 1.54777  |  |
| H |   | 1.42  | 0.47362  | 1.96915  | 0.5032   | 1.9687   |  |
| H |   | 1.42  | 1.92821  | 0.39009  | 2.03633  | 0.46695  |  |
| H |   | 5.24  | 4.8984   | 4.9081   | 4.90316  | 4.89227  |  |
| H | x | 5.74  | 5.70356  | 5.6275   | 5.73213  | 5.71453  |  |
| H |   | 1.83  | 1.88986  | 1.98435  | 1.43943  | 1.94755  |  |
| H |   | 1.56  | 1.53744  | 1.52061  | 1.8815   | 1.48732  |  |
| H |   | 2.29  | 2.14289  | 2.13646  | 2.11571  | 2.1256   |  |
| H |   | 1.33  | 1.30652  | 1.32149  | 1.24577  | 1.33791  |  |
| H |   | 2.02  | 1.98452  | 1.97591  | 1.93378  | 1.98504  |  |
| H |   | 1.25  | 1.30024  | 1.2617   | 1.22323  | 1.29603  |  |
| H |   | 1.71  | 1.38511  | 1.36224  | 1.25829  | 1.27601  |  |
| H |   | 1.6   | 1.29397  | 1.28027  | 1.48585  | 1.36607  |  |
| H |   | 2.99  | 2.75067  | 2.82806  | 2.91025  | 2.69781  |  |
| H |   | 1.53  | 1.82851  | 1.34833  | 1.38359  | 1.85306  |  |
| H |   | 1.59  | 1.30857  | 1.73839  | 1.86893  | 1.27287  |  |
| H |   | 1.12  | 1.14175  | 1.13083  | 1.2081   | 1.14943  |  |
| H |   | 2.4   | 2.36607  | 2.40206  | 2.48979  | 2.40394  |  |
| H | x | 5.88  | 6.45586  | 6.49801  | 6.47015  | 6.44683  |  |
| H | x | 6.19  | 6.84392  | 6.88861  | 6.81846  | 6.86401  |  |
| H |   | 1.18  | 1.49322  | 1.54028  | 1.55131  | 1.51194  |  |
| H |   | 1.18  | 0.35268  | 0.34361  | 0.34874  | 0.33855  |  |
| H |   | 1.18  | 1.34657  | 1.34929  | 1.33877  | 1.33493  |  |
| H |   | 2.19  | 2.01937  | 1.98929  | 2.62692  | 2.60937  |  |
| H |   | 2.5   | 2.60517  | 2.59746  | 2.04159  | 2.00589  |  |
| H |   | 1.29  | 1.37991  | 1.39516  | 1.39131  | 1.3919   |  |
| H |   | 1.48  | 1.62179  | 1.65183  | 1.65306  | 1.61981  |  |
| H |   | 2.38  | 2.50754  | 2.60865  | 3.15069  | 3.99974  |  |
| H |   | 3.83  | 4.05595  | 3.7875   | 3.25812  | 2.33497  |  |
| H |   | 2.7   | 2.66896  | 2.75839  | 2.83003  | 2.6065   |  |
| H |   | 1.97  | 2.12741  | 2.16738  | 1.85221  | 1.65013  |  |
| H |   | 1.85  | 1.68276  | 1.80986  | 2.19939  | 1.94362  |  |
| H |   | 1.66  | 1.85623  | 1.90267  | 1.55862  | 1.48696  |  |
| H |   | 1.48  | 1.49759  | 1.51911  | 1.93012  | 1.82907  |  |
| H | x | 5.86  | 5.5186   | 5.62859  | 5.60933  | 5.40767  |  |
| H |   | 1.14  | 1.89697  | 0.8077   | 1.43727  | 0.76142  |  |
| H |   | 1.14  | 0.7803   | 1.36536  | 1.46906  | 1.80592  |  |
| H |   | 1.14  | 1.32353  | 1.88044  | 1.11942  | 1.32941  |  |
| H | x | 10.45 | 10.64428 | 10.65019 | 10.58051 | 10.59033 |  |
| H |   | 5.67  | 5.54863  | 5.59871  | 5.53503  | 5.65398  |  |
| H |   | 1.46  | 1.62177  | 1.6557   | 1.61281  | 1.64723  |  |
| H |   | 1.46  | 1.68433  | 1.69788  | 1.71081  | 1.71599  |  |

| Functional<br>mPW1PW91 | Solvent?<br>PCM |          | Basis Set<br>6-311+G(d,p) |          | Type of Data<br>Unscaled Shifts |          |
|------------------------|-----------------|----------|---------------------------|----------|---------------------------------|----------|
|                        | Isomer 1        | Isomer 2 | Isomer 3                  | Isomer 4 | Isomer 5                        | Isomer 6 |
| sDP4+ (H data)         | 0.00%           | 100.00%  | 0.00%                     | 0.00%    | –                               | –        |
| sDP4+ (C data)         | 10.69%          | 68.40%   | 16.60%                    | 4.31%    | –                               | –        |
| sDP4+ (all data)       | 0.00%           | 100.00%  | 0.00%                     | 0.00%    | –                               | –        |
| uDP4+ (H data)         | 0.00%           | 100.00%  | 0.00%                     | 0.00%    | –                               | –        |
| uDP4+ (C data)         | 9.73%           | 25.41%   | 48.71%                    | 16.15%   | –                               | –        |
| uDP4+ (all data)       | 0.00%           | 100.00%  | 0.00%                     | 0.00%    | –                               | –        |
| DP4+ (H data)          | 0.00%           | 100.00%  | 0.00%                     | 0.00%    | –                               | –        |
| DP4+ (C data)          | 3.82%           | 63.89%   | 29.73%                    | 2.56%    | –                               | –        |
| DP4+ (all data)        | 0.00%           | 100.00%  | 0.00%                     | 0.00%    | –                               | –        |

**Figure S30.** DP4+ analysis of experimental NMR data of **5** and unscaled shifts of **5a-5d** (Isomer 1-4)

**Table S11.** The Cartesian coordinates of the lowest energy conformers for **5a–5d** in the gas phase at the B3LYP/6-31G(d,p) level

| 5a-1 | X axis(Å) | Y axis(Å) | Z axis(Å) | 5a-2 | X axis(Å) | Y axis(Å) | Z axis(Å) |
|------|-----------|-----------|-----------|------|-----------|-----------|-----------|
| C    | 2.9406    | 4.9869    | -0.0584   | C    | -2.7287   | 5.059     | -0.1256   |
| C    | 2.5401    | 4.2711    | 1.2315    | C    | -2.2703   | 4.313     | -1.3785   |
| C    | 1.8056    | 2.946     | 0.9742    | C    | -1.5434   | 2.9987    | -1.0502   |
| C    | 0.5994    | 3.1379    | 0.0093    | C    | -0.3693   | 3.2291    | -0.0547   |
| C    | 1.0579    | 3.7904    | -1.3472   | C    | -0.8797   | 3.92      | 1.2648    |
| C    | 1.7768    | 5.1335    | -1.0436   | C    | -1.6047   | 5.2448    | 0.898     |
| C    | -0.1997   | 1.8433    | -0.258    | C    | 0.455     | 1.9583    | 0.279     |
| C    | -1.4102   | 2.0831    | -1.1836   | C    | 1.651     | 2.2857    | 1.2022    |
| C    | -1.03     | 2.8206    | -2.4789   | C    | 1.1983    | 3.0266    | 2.4744    |
| C    | -0.1988   | 4.079     | -2.2145   | C    | 0.3423    | 4.2561    | 2.1619    |
| C    | 2.0153    | 2.9048    | -2.1893   | C    | -1.8511   | 3.0485    | 2.1048    |
| C    | 1.3765    | 2.3419    | 2.2933    | C    | -1.0674   | 2.3496    | -2.3299   |
| O    | 0.5133    | 2.7785    | 3.0423    | O    | -0.1825   | 2.771     | -3.062    |
| O    | -0.3246   | 4.0729    | 0.6243    | O    | 0.5572    | 4.1627    | -0.6725   |
| C    | -2.1405   | 0.7913    | -1.4616   | C    | 2.5173    | 1.0754    | 1.4799    |
| O    | -3.3546   | 0.6257    | -0.7952   | O    | 3.2096    | 0.5647    | 0.3759    |
| C    | -1.7507   | -0.1927   | -2.2705   | C    | 2.7768    | 0.5088    | 2.6578    |
| C    | -6.2443   | 0.5194    | -1.4533   | C    | 5.9897    | 0.9488    | -0.5588   |
| C    | -5.1176   | -0.1182   | -2.2564   | C    | 5.5631    | 0.665     | 0.8766    |
| C    | -3.9743   | -0.5647   | -1.335    | C    | 4.3064    | -0.2201   | 0.9025    |
| C    | -4.4682   | -1.5771   | -0.2432   | C    | 4.5581    | -1.5806   | 0.1693    |
| C    | -5.7013   | -1.0206   | 0.5631    | C    | 5.0966    | -1.3759   | -1.2949   |
| C    | -6.7789   | -0.4403   | -0.3977   | C    | 6.2604    | -0.343    | -1.3201   |
| C    | -3.3505   | -2.0359   | 0.7285    | C    | 3.3377    | -2.5315   | 0.1609    |
| C    | -2.9326   | -1.0052   | 1.7949    | C    | 2.2045    | -2.1631   | -0.8164   |
| C    | -4.1584   | -0.4319   | 2.5289    | C    | 2.7507    | -1.8713   | -2.2251   |
| C    | -5.246    | 0.0635    | 1.5729    | C    | 3.9498    | -0.9195   | -2.2298   |
| C    | -1.879    | -1.6103   | 2.7124    | C    | 1.1022    | -3.2143   | -0.8932   |
| C    | -0.4893   | -1.7143   | 2.1786    | C    | -0.2121   | -2.7944   | -1.4564   |
| C    | -2.0535   | -2.0493   | 3.9701    | C    | 1.1595    | -4.4916   | -0.4791   |
| C    | -6.4219   | -2.1511   | 1.3557    | C    | 5.6999    | -2.6886   | -1.8764   |
| C    | -2.8522   | -1.1356   | -2.1732   | C    | 3.8504    | -0.4173   | 2.3301    |
| O    | -2.8406   | -2.2334   | -2.7127   | O    | 4.3112    | -1.2156   | 3.1342    |
| C    | 4.589     | -4.6      | -0.8549   | C    | -4.7684   | -4.2175   | 1.1903    |
| C    | 3.692     | -3.4278   | -0.5351   | C    | -3.8279   | -3.0718   | 0.9141    |
| C    | 4.1396    | -2.1562   | -0.3938   | C    | -4.2277   | -1.8458   | 0.5003    |
| C    | 5.6379    | -1.8092   | -0.5248   | C    | -5.7192   | -1.5193   | 0.2804    |
| C    | 6.5379    | -3.0766   | -0.5284   | C    | -6.6065   | -2.7964   | 0.2755    |
| C    | 3.2582    | -0.9554   | -0.0832   | C    | -3.2854   | -0.6895   | 0.1918    |
| C    | 3.7478    | -0.1903   | 1.1584    | C    | -3.5266   | -0.1076   | -1.2131   |
| C    | 5.1998    | 0.2626    | 0.9701    | C    | -4.9831   | 0.3452    | -1.3595   |
| C    | 6.1023    | -0.9353   | 0.6739    | C    | -5.935    | -0.8195   | -1.0896   |

|   |         |         |         |   |         |         |         |
|---|---------|---------|---------|---|---------|---------|---------|
| C | 2.8423  | 0.9728  | 1.462   | C | -2.5808 | 1.0249  | -1.5096 |
| C | 2.1066  | 1.1147  | 2.5619  | C | -1.791  | 1.1154  | -2.5778 |
| O | 2.7432  | 1.9596  | 0.4872  | O | -2.5031 | 2.0378  | -0.5608 |
| C | 5.8639  | -1.0422 | -1.8491 | C | -6.1991 | -0.5907 | 1.4207  |
| C | 2.2509  | -3.8137 | -0.4063 | C | -2.3956 | -3.4067 | 1.1648  |
| O | 1.8939  | -4.9819 | -0.2903 | O | -1.9751 | -4.5586 | 1.1445  |
| O | -4.9362 | -2.7702 | -0.9202 | O | 5.6053  | -2.2808 | 0.89    |
| C | 5.9604  | -4.1949 | -1.3808 | C | -6.2175 | -3.7811 | 1.3676  |
| O | -0.1582 | -1.282  | 1.0805  | O | -0.4782 | -1.6297 | -1.7282 |
| H | 0.2455  | -2.2035 | 2.8405  | H | -0.9555 | -3.597  | -1.6018 |
| H | 3.3286  | 5.9823  | 0.189   | H | -3.117  | 6.0428  | -0.4149 |
| H | 3.7704  | 4.4505  | -0.5318 | H | -3.57   | 4.5259  | 0.331   |
| H | 3.4473  | 4.0945  | 1.8235  | H | -3.1512 | 4.1152  | -2.0029 |
| H | 1.9074  | 4.9424  | 1.8265  | H | -1.6164 | 4.9709  | -1.9652 |
| H | 2.1511  | 5.58    | -1.9737 | H | -2.0186 | 5.711   | 1.8013  |
| H | 1.0618  | 5.8563  | -0.6294 | H | -0.8838 | 5.9659  | 0.491   |
| H | 0.4523  | 1.0657  | -0.672  | H | -0.176  | 1.184   | 0.7298  |
| H | -0.5884 | 1.4519  | 0.6907  | H | 0.8575  | 1.5302  | -0.6482 |
| H | -2.1115 | 2.739   | -0.6479 | H | 2.3062  | 2.9834  | 0.6599  |
| H | -0.4772 | 2.1598  | -3.1567 | H | 0.6387  | 2.3508  | 3.1321  |
| H | -1.9423 | 3.1067  | -3.0184 | H | 2.0767  | 3.3534  | 3.0458  |
| H | -0.8367 | 4.8272  | -1.7268 | H | 0.9753  | 5.011   | 1.6778  |
| H | 0.0959  | 4.5201  | -3.1754 | H | 0.0091  | 4.7082  | 3.1049  |
| H | 1.6218  | 1.8991  | -2.3587 | H | -1.4531 | 2.0516  | 2.3114  |
| H | 2.1827  | 3.3542  | -3.1758 | H | -2.049  | 3.5221  | 3.0742  |
| H | 3.0032  | 2.7886  | -1.7394 | H | -2.826  | 2.9124  | 1.6327  |
| H | -0.546  | 3.7473  | 1.5219  | H | 0.8061  | 3.8124  | -1.5544 |
| H | -0.8677 | -0.3087 | -2.8679 | H | 2.4136  | 0.7165  | 3.6456  |
| H | -5.8993 | 1.4473  | -0.9837 | H | 5.2233  | 1.5388  | -1.0742 |
| H | -7.0582 | 0.8004  | -2.1319 | H | 6.8988  | 1.5615  | -0.5518 |
| H | -5.5048 | -0.9687 | -2.8313 | H | 6.3847  | 0.1873  | 1.4247  |
| H | -4.7597 | 0.6167  | -2.989  | H | 5.3761  | 1.6254  | 1.3739  |
| H | -7.2802 | -1.2646 | -0.9234 | H | 7.1604  | -0.7991 | -0.8852 |
| H | -7.5613 | 0.0681  | 0.1805  | H | 6.5198  | -0.096  | -2.3576 |
| H | -2.475  | -2.3575 | 0.1503  | H | 3.712   | -3.5376 | -0.068  |
| H | -3.676  | -2.9582 | 1.2306  | H | 2.9281  | -2.628  | 1.1747  |
| H | -2.4555 | -0.1531 | 1.3007  | H | 1.7398  | -1.2462 | -0.4354 |
| H | -4.5993 | -1.1783 | 3.1981  | H | 1.9632  | -1.4292 | -2.8485 |
| H | -3.844  | 0.4018  | 3.1699  | H | 3.0268  | -2.8097 | -2.722  |
| H | -6.1044 | 0.4001  | 2.1691  | H | 4.3207  | -0.8358 | -3.2599 |
| H | -4.8835 | 0.9583  | 1.0584  | H | 3.6026  | 0.0844  | -1.9671 |
| H | -1.2437 | -2.4642 | 4.564   | H | 0.309   | -5.1671 | -0.5454 |
| H | -3.0206 | -2.0211 | 4.4612  | H | 2.0516  | -4.9234 | -0.0387 |
| H | -5.753  | -2.6871 | 2.0339  | H | 4.9879  | -3.5178 | -1.8834 |
| H | -7.2391 | -1.7403 | 1.9606  | H | 6.0313  | -2.5374 | -2.9108 |
| H | -6.8643 | -2.897  | 0.6859  | H | 6.5747  | -3.0202 | -1.3059 |
| H | 4.7124  | -5.201  | 0.0552  | H | -4.702  | -4.9305 | 0.3586  |



|             |                  |                  |                  |             |                  |                  |                  |
|-------------|------------------|------------------|------------------|-------------|------------------|------------------|------------------|
| H           | 4.1196           | -5.2468          | -1.6063          | H           | -4.4624          | -4.7529          | 2.0975           |
| H           | 6.6591           | -3.4584          | 0.4948           | H           | -6.5212          | -3.3124          | -0.6908          |
| H           | 7.547            | -2.8289          | -0.8811          | H           | -7.6647          | -2.5274          | 0.3835           |
| H           | 3.2422           | -0.2963          | -0.9608          | H           | -3.4249          | 0.0826           | 0.9593           |
| H           | 2.2184           | -1.2348          | 0.0849           | H           | -2.2342          | -0.9781          | 0.2562           |
| H           | 3.719            | -0.8817          | 2.0136           | H           | -3.3467          | -0.9085          | -1.9453          |
| H           | 5.2784           | 0.9982           | 0.1603           | H           | -5.2035          | 1.1772           | -0.6796          |
| H           | 5.5574           | 0.7636           | 1.8785           | H           | -5.16            | 0.7208           | -2.3753          |
| H           | 7.1259           | -0.5775          | 0.5038           | H           | -6.9694          | -0.4613          | -1.1699          |
| H           | 6.1415           | -1.5516          | 1.5829           | H           | -5.8014          | -1.55            | -1.8997          |
| H           | 2.0009           | 0.4872           | 3.425            | H           | -1.6519          | 0.4479           | -3.4062          |
| H           | 5.3332           | -0.0853          | -1.8754          | H           | -5.673           | 0.3692           | 1.4281           |
| H           | 6.9273           | -0.8215          | -1.998           | H           | -7.2682          | -0.3691          | 1.3228           |
| H           | 5.5216           | -1.6202          | -2.7145          | H           | -6.0446          | -1.0458          | 2.4053           |
| H           | 1.5105           | -3.0035          | -0.4174          | H           | -1.7179          | -2.5652          | 1.3665           |
| H           | -4.2196          | -3.0969          | -1.5049          | H           | 5.3286           | -2.3676          | 1.827            |
| H           | 5.8845           | -3.8798          | -2.4278          | H           | -6.3568          | -3.3309          | 2.3572           |
| H           | 6.6301           | -5.0625          | -1.3632          | H           | -6.8718          | -4.6597          | 1.3289           |
| <b>5a-3</b> | <b>X axis(Å)</b> | <b>Y axis(Å)</b> | <b>Z axis(Å)</b> | <b>5a-4</b> | <b>X axis(Å)</b> | <b>Y axis(Å)</b> | <b>Z axis(Å)</b> |
| C           | -2.8425          | 4.6512           | 1.4157           | C           | -2.6313          | 4.7521           | 1.4904           |
| C           | -3.0211          | 4.3874           | -0.0798          | C           | -2.9144          | 4.4817           | 0.0126           |
| C           | -2.1394          | 3.2351           | -0.5881          | C           | -2.1119          | 3.2917           | -0.5392          |
| C           | -0.6465          | 3.4534           | -0.2089          | C           | -0.5906          | 3.4509           | -0.255           |
| C           | -0.4802          | 3.6229           | 1.3476           | C           | -0.321           | 3.6306           | 1.2857           |
| C           | -1.3733          | 4.8015           | 1.8237           | C           | -1.1345          | 4.8491           | 1.8014           |
| C           | 0.3036           | 2.3561           | -0.737           | C           | 0.2771           | 2.3071           | -0.8238          |
| C           | 1.7795           | 2.6452           | -0.3774          | C           | 1.7839           | 2.5303           | -0.5563          |
| C           | 1.9714           | 2.9014           | 1.1233           | C           | 2.0801           | 2.8056           | 0.924            |
| C           | 1.0035           | 3.9586           | 1.6617           | C           | 1.1916           | 3.91             | 1.502            |
| C           | -0.8557          | 2.3617           | 2.172            | C           | -0.6949          | 2.3942           | 2.1478           |
| C           | -2.3243          | 3.0719           | -2.0804          | C           | -2.3986          | 3.1313           | -2.0157          |
| O           | -1.9149          | 3.8344           | -2.9446          | O           | -2.0047          | 3.8666           | -2.9102          |
| O           | -0.2082          | 4.6984           | -0.8126          | O           | -0.1377          | 4.6685           | -0.9014          |
| C           | 2.7015           | 1.5553           | -0.8667          | C           | 2.6058           | 1.3749           | -1.0717          |
| O           | 2.2436           | 0.2392           | -0.7891          | O           | 2.1703           | 0.0891           | -0.7495          |
| C           | 3.9146           | 1.7537           | -1.3793          | C           | 3.704            | 1.4814           | -1.8173          |
| C           | 1.4356           | -1.9253          | -2.6639          | C           | 0.9956           | -2.233           | -2.154           |
| C           | 2.6052           | -0.9665          | -2.8431          | C           | 2.1246           | -1.3536          | -2.6742          |
| C           | 3.2128           | -0.5804          | -1.4864          | C           | 2.985            | -0.8307          | -1.5152          |
| C           | 3.6861           | -1.8409          | -0.6785          | C           | 3.5942           | -2.0058          | -0.6715          |
| C           | 2.5467           | -2.9204          | -0.5446          | C           | 2.4891           | -3.0171          | -0.183           |
| C           | 1.8697           | -3.1815          | -1.9199          | C           | 1.5379           | -3.408           | -1.3503          |
| C           | 4.2691           | -1.4997          | 0.7161           | C           | 4.454            | -1.5291          | 0.526            |
| C           | 3.23             | -1.1155          | 1.7866           | C           | 3.6591           | -0.9806          | 1.7251           |
| C           | 2.1013           | -2.1589          | 1.867            | C           | 2.5574           | -1.9635          | 2.1589           |
| C           | 1.4907           | -2.4733          | 0.4986           | C           | 1.6755           | -2.4125          | 0.9902           |
| C           | 3.9195           | -0.8254          | 3.1116           | C           | 4.6059           | -0.5567          | 2.8375           |

|   |         |         |         |   |         |         |         |
|---|---------|---------|---------|---|---------|---------|---------|
| C | 4.6473  | 0.4751  | 3.2199  | C | 5.3448  | 0.7264  | 2.6367  |
| C | 3.9246  | -1.5967 | 4.2112  | C | 4.832   | -1.1932 | 3.9984  |
| C | 3.1154  | -4.2997 | -0.0979 | C | 3.1164  | -4.357  | 0.3033  |
| C | 4.3379  | 0.4053  | -1.715  | C | 4.0504  | 0.0919  | -2.0657 |
| O | 5.4555  | 0.1373  | -2.1345 | O | 5.0652  | -0.2529 | -2.6558 |
| C | -3.8425 | -4.8414 | 0.2279  | C | -4.1389 | -4.7385 | 0.2089  |
| C | -3.173  | -3.5596 | -0.2132 | C | -3.4663 | -3.4771 | -0.2835 |
| C | -3.5996 | -2.3238 | 0.1469  | C | -3.7511 | -2.2382 | 0.1885  |
| C | -4.8627 | -2.1374 | 1.0156  | C | -4.8629 | -2.019  | 1.2374  |
| C | -5.6957 | -3.4437 | 1.1374  | C | -5.7497 | -3.2805 | 1.4317  |
| C | -2.9168 | -1.0131 | -0.2277 | C | -3.0407 | -0.9534 | -0.2217 |
| C | -3.8861 | -0.0055 | -0.8732 | C | -4.022  | 0.1341  | -0.6942 |
| C | -5.1044 | 0.2388  | 0.0264  | C | -5.0923 | 0.4077  | 0.3713  |
| C | -5.7981 | -1.0746 | 0.379   | C | -5.8099 | -0.8785 | 0.7751  |
| C | -3.1922 | 1.2967  | -1.1783 | C | -3.2905 | 1.4031  | -1.0487 |
| C | -3.0477 | 1.8461  | -2.3818 | C | -3.2052 | 1.9457  | -2.261  |
| O | -2.6562 | 1.9803  | -0.0921 | O | -2.6459 | 2.0594  | -0.005  |
| C | -4.4428 | -1.6891 | 2.4356  | C | -4.2216 | -1.6566 | 2.5978  |
| C | -1.9764 | -3.8006 | -1.0778 | C | -2.4448 | -3.742  | -1.3441 |
| O | -1.6284 | -4.923  | -1.4284 | O | -2.183  | -4.8705 | -1.7462 |
| O | 4.7539  | -2.4755 | -1.4248 | O | 4.4798  | -2.7617 | -1.5341 |
| C | -4.8227 | -4.663  | 1.3797  | C | -4.9276 | -4.5563 | 1.499   |
| O | 4.7031  | 1.2828  | 2.3004  | O | 5.2152  | 1.4163  | 1.6325  |
| H | 5.1399  | 0.6744  | 4.1867  | H | 6.0243  | 1.0258  | 3.4527  |
| H | -3.3852 | 5.5648  | 1.6865  | H | -3.1202 | 5.6886  | 1.7842  |
| H | -3.3113 | 3.8428  | 1.9877  | H | -3.0932 | 3.968   | 2.1004  |
| H | -4.0804 | 4.1682  | -0.2662 | H | -3.9911 | 4.303   | -0.1039 |
| H | -2.7936 | 5.3079  | -0.6326 | H | -2.687  | 5.3879  | -0.5635 |
| H | -1.3148 | 4.9025  | 2.915   | H | -1.002  | 4.9602  | 2.8852  |
| H | -0.9958 | 5.7471  | 1.4134  | H | -0.7477 | 5.7742  | 1.3545  |
| H | 0.2389  | 2.3017  | -1.8316 | H | -0.0517 | 1.3436  | -0.4177 |
| H | -0.0041 | 1.3744  | -0.3591 | H | 0.1445  | 2.245   | -1.9119 |
| H | 2.066   | 3.5692  | -0.9005 | H | 2.086   | 3.4267  | -1.1169 |
| H | 1.852   | 1.9711  | 1.6894  | H | 1.9586  | 1.8925  | 1.5167  |
| H | 2.9973  | 3.2423  | 1.3113  | H | 3.1289  | 3.1057  | 1.0398  |
| H | 1.2728  | 4.9331  | 1.2343  | H | 1.473   | 4.8661  | 1.0422  |
| H | 1.1501  | 4.0578  | 2.7449  | H | 1.4089  | 4.0189  | 2.5724  |
| H | -0.3471 | 1.4599  | 1.8211  | H | -0.2423 | 1.4694  | 1.7804  |
| H | -0.5785 | 2.4969  | 3.2247  | H | -0.3515 | 2.5308  | 3.1806  |
| H | -1.926  | 2.1469  | 2.169   | H | -1.7709 | 2.2204  | 2.2092  |
| H | -0.4107 | 4.6683  | -1.7714 | H | -0.4018 | 4.638   | -1.8451 |
| H | 4.4782  | 2.6551  | -1.5229 | H | 4.2324  | 2.3449  | -2.1722 |
| H | 0.6151  | -1.4297 | -2.1332 | H | 0.3049  | -1.6411 | -1.5432 |
| H | 1.0427  | -2.2055 | -3.6482 | H | 0.4131  | -2.6126 | -3.0016 |
| H | 3.3651  | -1.4238 | -3.4893 | H | 2.7382  | -1.9167 | -3.3885 |
| H | 2.2408  | -0.0762 | -3.3716 | H | 1.6801  | -0.5203 | -3.2336 |
| H | 2.5652  | -3.729  | -2.5708 | H | 2.07    | -4.0686 | -2.0485 |

|             |                  |                  |                  |             |                  |                  |                  |
|-------------|------------------|------------------|------------------|-------------|------------------|------------------|------------------|
| H           | 1.0017           | -3.8388          | -1.7911          | H           | 0.6948           | -3.9951          | -0.9644          |
| H           | 4.855            | -2.3569          | 1.0772           | H           | 5.0861           | -2.3619          | 0.8657           |
| H           | 5.0194           | -0.7066          | 0.6092           | H           | 5.1808           | -0.7856          | 0.1762           |
| H           | 2.7452           | -0.1812          | 1.4921           | H           | 3.137            | -0.072           | 1.4165           |
| H           | 2.4629           | -3.0918          | 2.3128           | H           | 2.9905           | -2.8507          | 2.6336           |
| H           | 1.3081           | -1.7914          | 2.5309           | H           | 1.9219           | -1.4909          | 2.9189           |
| H           | 0.7376           | -3.2617          | 0.6277           | H           | 0.9543           | -3.1516          | 1.3632           |
| H           | 0.9351           | -1.597           | 0.1507           | H           | 1.0713           | -1.563           | 0.6572           |
| H           | 4.4367           | -1.3076          | 5.1248           | H           | 5.521            | -0.8133          | 4.7478           |
| H           | 3.4226           | -2.5581          | 4.2421           | H           | 4.3426           | -2.1294          | 4.2457           |
| H           | 3.6749           | -4.245           | 0.8395           | H           | 3.8546           | -4.217           | 1.097            |
| H           | 2.3052           | -5.0242          | 0.0478           | H           | 2.3422           | -5.0288          | 0.693            |
| H           | 3.7905           | -4.7228          | -0.8502          | H           | 3.6192           | -4.8887          | -0.5124          |
| H           | -4.3717          | -5.2683          | -0.6339          | H           | -4.8134          | -5.0994          | -0.5783          |
| H           | -3.0924          | -5.5779          | 0.5413           | H           | -3.396           | -5.5267          | 0.382            |
| H           | -6.2711          | -3.6143          | 0.2169           | H           | -6.4609          | -3.3769          | 0.5997           |
| H           | -6.4337          | -3.3537          | 1.9444           | H           | -6.3571          | -3.1858          | 2.3406           |
| H           | -2.4735          | -0.5871          | 0.6819           | H           | -2.459           | -0.5933          | 0.6371           |
| H           | -2.0777          | -1.1534          | -0.9121          | H           | -2.3035          | -1.1105          | -1.0114          |
| H           | -4.2451          | -0.441           | -1.8171          | H           | -4.531           | -0.2395          | -1.5945          |
| H           | -4.8144          | 0.7625           | 0.9454           | H           | -4.651           | 0.8767           | 1.2591           |
| H           | -5.8208          | 0.8938           | -0.4858          | H           | -5.8302          | 1.1215           | -0.0169          |
| H           | -6.6393          | -0.8635          | 1.0518           | H           | -6.5347          | -0.6484          | 1.5667           |
| H           | -6.2378          | -1.4773          | -0.5441          | H           | -6.3978          | -1.2167          | -0.0895          |
| H           | -3.3604          | 1.5138           | -3.3529          | H           | -3.6             | 1.6289           | -3.207           |
| H           | -3.9315          | -0.7214          | 2.4378           | H           | -3.6608          | -0.7175          | 2.5627           |
| H           | -5.3167          | -1.5896          | 3.0897           | H           | -4.9874          | -1.5412          | 3.3736           |
| H           | -3.7605          | -2.4086          | 2.9015           | H           | -3.5231          | -2.4307          | 2.9341           |
| H           | -1.407           | -2.9222          | -1.4023          | H           | -1.9337          | -2.8737          | -1.7743          |
| H           | 5.4433           | -1.8034          | -1.613           | H           | 5.1289           | -2.1419          | -1.9304          |
| H           | -4.2783          | -4.565           | 2.3258           | H           | -4.246           | -4.5302          | 2.3568           |
| H           | -5.4477          | -5.5589          | 1.471            | H           | -5.5866          | -5.419           | 1.6505           |
| <b>5a-5</b> | <b>X axis(Å)</b> | <b>Y axis(Å)</b> | <b>Z axis(Å)</b> | <b>5a-6</b> | <b>X axis(Å)</b> | <b>Y axis(Å)</b> | <b>Z axis(Å)</b> |
| C           | 2.9082           | 4.9839           | 0.171            | C           | 3.2598           | -4.4323          | 1.2789           |
| C           | 2.5217           | 4.1859           | 1.4164           | C           | 3.3882           | -4.112           | -0.2104          |
| C           | 1.7855           | 2.8796           | 1.081            | C           | 2.3786           | -3.0524          | -0.6812          |
| C           | 0.5677           | 3.1329           | 0.1451           | C           | 0.9233           | -3.4379          | -0.2889          |
| C           | 1.0107           | 3.8719           | -1.1717          | C           | 0.801            | -3.663           | 1.2644           |
| C           | 1.7338           | 5.1929           | -0.7904          | C           | 1.8211           | -4.7511          | 1.6979           |
| C           | -0.238           | 1.859            | -0.195           | C           | -0.1445          | -2.4327          | -0.7742          |
| C           | -1.4608          | 2.1623           | -1.085           | C           | -1.5757          | -2.8834          | -0.4025          |
| C           | -1.0923          | 2.977            | -2.3371          | C           | -1.7164          | -3.2014          | 1.0926           |
| C           | -0.256           | 4.2157           | -2.0039          | C           | -0.6334          | -4.1621          | 1.5897           |
| C           | 1.9576           | 3.0427           | -2.0804          | C           | 1.0558           | -2.3895          | 2.1152           |
| C           | 1.3696           | 2.1887           | 2.3609           | C           | 2.5255           | -2.8424          | -2.1719          |
| O           | 0.52             | 2.5785           | 3.1501           | O           | 2.1893           | -3.629           | -3.0462          |
| O           | -0.3472          | 4.0274           | 0.8304           | O           | 0.606            | -4.706           | -0.9211          |

|   |         |         |         |   |         |         |         |
|---|---------|---------|---------|---|---------|---------|---------|
| C | -2.2067 | 0.8944  | -1.4258 | C | -2.6206 | -1.8836 | -0.8345 |
| O | -3.3754 | 0.6655  | -0.6986 | O | -2.2764 | -0.5317 | -0.8022 |
| C | -1.8758 | -0.0108 | -2.3454 | C | -3.8485 | -2.1939 | -1.2455 |
| C | -6.2989 | 0.6482  | -1.1993 | C | -1.8548 | 1.6821  | -2.7741 |
| C | -5.2275 | 0.0812  | -2.122  | C | -2.934  | 0.6096  | -2.8254 |
| C | -4.0412 | -0.4621 | -1.3134 | C | -3.3696 | 0.1939  | -1.4129 |
| C | -4.489  | -1.5709 | -0.2984 | C | -3.872  | 1.4161  | -0.5666 |
| C | -5.6686 | -1.0854 | 0.6253  | C | -2.8405 | 2.6075  | -0.5658 |
| C | -6.7887 | -0.4047 | -0.2131 | C | -2.3404 | 2.905   | -2.0074 |
| C | -3.3267 | -2.1317 | 0.5603  | C | -4.2626 | 1.0494  | 0.8894  |
| C | -2.8387 | -1.215  | 1.6985  | C | -3.0818 | 0.8005  | 1.8532  |
| C | -4.0144 | -0.7061 | 2.5516  | C | -2.0603 | 1.9473  | 1.7921  |
| C | -5.1441 | -0.1093 | 1.709   | C | -1.6414 | 2.2917  | 0.3618  |
| C | -1.7468 | -1.9196 | 2.4916  | C | -3.4935 | 0.535   | 3.2953  |
| C | -0.3872 | -1.9699 | 1.879   | C | -2.5098 | -0.1807 | 4.163   |
| C | -1.8631 | -2.494  | 3.7004  | C | -4.6645 | 0.8461  | 3.8759  |
| C | -6.3608 | -2.2819 | 1.3429  | C | -3.494  | 3.9329  | -0.0744 |
| C | -2.975  | -0.9581 | -2.2645 | C | -4.4204 | -0.8891 | -1.5276 |
| O | -3.0032 | -2.0033 | -2.8996 | O | -5.6    | -0.7253 | -1.8073 |
| C | 4.7167  | -4.5185 | -0.8048 | C | 3.046   | 5.203   | -0.0253 |
| C | 3.7554  | -3.3605 | -0.7    | C | 2.5661  | 3.8404  | -0.4703 |
| C | 4.1575  | -2.0678 | -0.6544 | C | 3.0878  | 2.6738  | -0.0174 |
| C | 5.6365  | -1.6634 | -0.8195 | C | 4.2826  | 2.6587  | 0.961   |
| C | 6.5622  | -2.8728 | -1.1292 | C | 4.9477  | 4.056   | 1.1058  |
| C | 3.2548  | -0.8959 | -0.3066 | C | 2.5888  | 1.2822  | -0.3885 |
| C | 3.7138  | -0.2686 | 1.0251  | C | 3.7156  | 0.3814  | -0.9258 |
| C | 5.1869  | 0.1641  | 0.9565  | C | 4.8781  | 0.3029  | 0.073   |
| C | 6.0949  | -0.987  | 0.5014  | C | 5.3841  | 1.6965  | 0.4392  |
| C | 2.8194  | 0.8747  | 1.4198  | C | 3.1938  | -0.9953 | -1.2461 |
| C | 2.0917  | 0.9397  | 2.5322  | C | 3.1047  | -1.5387 | -2.4577 |
| O | 2.7193  | 1.9298  | 0.5198  | O | 2.7598  | -1.7576 | -0.1674 |
| C | 5.8127  | -0.6784 | -2.0011 | C | 3.7962  | 2.201   | 2.3564  |
| C | 2.3199  | -3.768  | -0.589  | C | 1.4441  | 3.9153  | -1.4563 |
| O | 1.9761  | -4.9174 | -0.3341 | O | 1.0161  | 4.9784  | -1.8933 |
| O | -5.0097 | -2.6886 | -1.0607 | O | -5.0728 | 1.9309  | -1.195  |
| C | 6.1387  | -4.1406 | -0.4057 | C | 3.9233  | 5.1721  | 1.2192  |
| O | -0.1064 | -1.4063 | 0.8274  | O | -1.4122 | -0.5497 | 3.7639  |
| H | 0.3726  | -2.5433 | 2.4371  | H | -2.8287 | -0.3654 | 5.2029  |
| H | 3.2988  | 5.9615  | 0.4778  | H | 3.9013  | -5.2888 | 1.5186  |
| H | 3.7327  | 4.4797  | -0.345  | H | 3.647   | -3.5935 | 1.8677  |
| H | 3.4353  | 3.9722  | 1.986   | H | 4.4144  | -3.7728 | -0.4019 |
| H | 1.8953  | 4.8166  | 2.0603  | H | 3.2559  | -5.0381 | -0.7844 |
| H | 2.0982  | 5.6981  | -1.6939 | H | 1.7886  | -4.8869 | 2.7864  |
| H | 1.0237  | 5.8875  | -0.323  | H | 1.5416  | -5.7205 | 1.2651  |
| H | 0.4054  | 1.1098  | -0.6703 | H | 0.0651  | -1.4342 | -0.374  |
| H | -0.6133 | 1.4054  | 0.7311  | H | -0.1037 | -2.3439 | -1.8677 |
| H | -2.1499 | 2.7895  | -0.5011 | H | -1.7754 | -3.8153 | -0.9513 |

|             |                  |                  |                  |             |                  |                  |                  |
|-------------|------------------|------------------|------------------|-------------|------------------|------------------|------------------|
| H           | -0.547           | 2.3586           | -3.0593          | H           | -1.6883          | -2.2789          | 1.681            |
| H           | -2.0093          | 3.297            | -2.8486          | H           | -2.6987          | -3.6513          | 1.2866           |
| H           | -0.8868          | 4.9322           | -1.4623          | H           | -0.8048          | -5.1489          | 1.1407           |
| H           | 0.028            | 4.7163           | -2.9386          | H           | -0.7508          | -4.3026          | 2.6719           |
| H           | 1.5625           | 2.0493           | -2.3082          | H           | 0.4517           | -1.538           | 1.7918           |
| H           | 2.1123           | 3.554            | -3.0384          | H           | 0.8101           | -2.5774          | 3.1676           |
| H           | 2.9513           | 2.8997           | -1.6514          | H           | 2.0976           | -2.0634          | 2.1038           |
| H           | -0.5584          | 3.6448           | 1.7078           | H           | 0.8088           | -4.6358          | -1.8777          |
| H           | -1.0361          | -0.0703          | -3.0098          | H           | -4.3401          | -3.1429          | -1.3397          |
| H           | -5.9151          | 1.5228           | -0.6623          | H           | -0.9414          | 1.2814           | -2.3208          |
| H           | -7.1447          | 1.0014           | -1.8009          | H           | -1.5892          | 1.9778           | -3.7958          |
| H           | -5.6578          | -0.7067          | -2.753           | H           | -3.794           | 0.977            | -3.3996          |
| H           | -4.9008          | 0.8801           | -2.8001          | H           | -2.5353          | -0.2517          | -3.3769          |
| H           | -7.3299          | -1.1693          | -0.7872          | H           | -3.1528          | 3.3623           | -2.5889          |
| H           | -7.531           | 0.0521           | 0.4542           | H           | -1.5373          | 3.651            | -1.9789          |
| H           | -3.6366          | -3.0968          | 0.9861           | H           | -4.8922          | 1.8602           | 1.2778           |
| H           | -2.4873          | -2.4006          | -0.0935          | H           | -4.9261          | 0.1748           | 0.8883           |
| H           | -2.3775          | -0.3222          | 1.2646           | H           | -2.5807          | -0.1089          | 1.5117           |
| H           | -4.4295          | -1.5104          | 3.1682           | H           | -2.4647          | 2.8391           | 2.2864           |
| H           | -3.6539          | 0.0577           | 3.2526           | H           | -1.1571          | 1.6813           | 2.3553           |
| H           | -5.9643          | 0.1759           | 2.381            | H           | -0.9618          | 3.1529           | 0.3987           |
| H           | -4.7962          | 0.8278           | 1.2642           | H           | -1.0425          | 1.4658           | -0.035           |
| H           | -1.0286          | -2.9752          | 4.2032           | H           | -4.8838          | 0.6087           | 4.9134           |
| H           | -2.8049          | -2.5174          | 4.2387           | H           | -5.4559          | 1.3603           | 3.3405           |
| H           | -5.6633          | -2.8879          | 1.9269           | H           | -3.9367          | 3.8443           | 0.921            |
| H           | -7.1376          | -1.9253          | 2.0299           | H           | -2.7508          | 4.738            | -0.0294          |
| H           | -6.8499          | -2.9545          | 0.6293           | H           | -4.2876          | 4.2691           | -0.7511          |
| H           | 4.4038           | -5.3472          | -0.1589          | H           | 3.6065           | 5.6589           | -0.8517          |
| H           | 4.7055           | -4.8919          | -1.8364          | H           | 2.1929           | 5.8597           | 0.1854           |
| H           | 7.602            | -2.6334          | -0.8732          | H           | 5.5845           | 4.2659           | 0.2354           |
| H           | 6.5573           | -3.0843          | -2.2077          | H           | 5.6118           | 4.0759           | 1.9791           |
| H           | 3.2679           | -0.1617          | -1.1205          | H           | 2.1312           | 0.8308           | 0.5017           |
| H           | 2.209            | -1.1849          | -0.206           | H           | 1.7906           | 1.3035           | -1.1333          |
| H           | 3.6368           | -1.045           | 1.8013           | H           | 4.0974           | 0.8348           | -1.8521          |
| H           | 5.3068           | 1.0187           | 0.2795           | H           | 4.5779           | -0.2298          | 0.9835           |
| H           | 5.5194           | 0.5092           | 1.9438           | H           | 5.7041           | -0.2745          | -0.3615          |
| H           | 7.1186           | -0.6059          | 0.3948           | H           | 6.1831           | 1.6004           | 1.1857           |
| H           | 6.1277           | -1.7316          | 1.3077           | H           | 5.8526           | 2.1259           | -0.4573          |
| H           | 1.9879           | 0.2515           | 3.348            | H           | 3.3591           | -1.1529          | -3.4259          |
| H           | 5.2925           | 0.2721           | -1.8537          | H           | 3.4045           | 1.1791           | 2.3521           |
| H           | 6.8722           | -0.4396          | -2.1526          | H           | 4.6156           | 2.2246           | 3.0842           |
| H           | 5.4333           | -1.1127          | -2.9338          | H           | 2.9964           | 2.8458           | 2.7368           |
| H           | 1.5676           | -2.9856          | -0.7589          | H           | 1.0089           | 2.9679           | -1.7941          |
| H           | -4.3294          | -2.9639          | -1.7116          | H           | -5.7051          | 1.1918           | -1.3206          |
| H           | 6.8207           | -4.9604          | -0.6591          | H           | 3.3043           | 5.0372           | 2.1136           |
| H           | 6.2021           | -4.0003          | 0.6799           | H           | 4.4313           | 6.1367           | 1.3335           |
| <b>5a-7</b> | <b>X axis(Å)</b> | <b>Y axis(Å)</b> | <b>Z axis(Å)</b> | <b>5a-8</b> | <b>X axis(Å)</b> | <b>Y axis(Å)</b> | <b>Z axis(Å)</b> |

|   |         |         |         |   |         |         |         |
|---|---------|---------|---------|---|---------|---------|---------|
| C | -1.8952 | 5.1212  | 0.183   | C | 2.1467  | 4.7502  | 0.5425  |
| C | -1.6153 | 4.4754  | -1.1728 | C | 1.8057  | 3.845   | 1.726   |
| C | -0.822  | 3.1632  | -1.0645 | C | 0.9364  | 2.6413  | 1.3259  |
| C | 0.4642  | 3.3309  | -0.2033 | C | -0.3289 | 3.0879  | 0.5377  |
| C | 0.129   | 3.9172  | 1.2152  | C | 0.055   | 3.9428  | -0.723  |
| C | -0.6359 | 5.2572  | 1.0428  | C | 0.9126  | 5.1555  | -0.2693 |
| C | 1.2847  | 2.0314  | -0.059  | C | -1.2525 | 1.9211  | 0.1318  |
| C | 2.5949  | 2.2307  | 0.7397  | C | -2.5398 | 2.4009  | -0.5787 |
| C | 2.3404  | 2.9433  | 2.0842  | C | -2.2182 | 3.3406  | -1.7573 |
| C | 1.462   | 4.1915  | 1.961   | C | -1.2501 | 4.467   | -1.3821 |
| C | -0.7297 | 2.9821  | 2.1078  | C | 0.8496  | 3.1641  | -1.8049 |
| C | -0.5065 | 2.666   | -2.4562 | C | 0.5755  | 1.851   | 2.5629  |
| O | 0.2781  | 3.1739  | -3.2453 | O | -0.2063 | 2.1942  | 3.4387  |
| O | 1.3226  | 4.3002  | -0.8577 | O | -1.1103 | 3.9549  | 1.4011  |
| C | 3.3625  | 0.9273  | 0.8917  | C | -3.4278 | 1.2296  | -0.9553 |
| O | 3.3292  | 0.0549  | -0.2024 | O | -3.6549 | 0.2918  | 0.0571  |
| C | 4.0576  | 0.5255  | 1.9556  | C | -4.0169 | 0.9993  | -2.1281 |
| C | 5.1048  | -1.0905 | -2.269  | C | -5.8188 | -0.7313 | 1.7832  |
| C | 5.4666  | -0.8585 | -0.8068 | C | -5.9504 | -0.3656 | 0.3092  |
| C | 4.235   | -1.0356 | 0.0894  | C | -4.6399 | -0.6453 | -0.4359 |
| C | 3.606   | -2.4678 | -0.0656 | C | -4.2161 | -2.1532 | -0.3158 |
| C | 3.3055  | -2.8279 | -1.5696 | C | -4.1571 | -2.6357 | 1.1826  |
| C | 4.5207  | -2.4824 | -2.4783 | C | -5.433  | -2.1955 | 1.9577  |
| C | 2.3422  | -2.6878 | 0.806   | C | -2.8869 | -2.4839 | -1.0411 |
| C | 1.063   | -2.0072 | 0.2868  | C | -1.6137 | -2.0037 | -0.3238 |
| C | 0.8094  | -2.3578 | -1.1887 | C | -1.5933 | -2.4543 | 1.1461  |
| C | 2.0366  | -2.0887 | -2.0651 | C | -2.8859 | -2.0901 | 1.8837  |
| C | -0.099  | -2.2914 | 1.226   | C | -0.3855 | -2.3947 | -1.1291 |
| C | -0.156  | -1.4833 | 2.483   | C | -0.0327 | -1.5162 | -2.2855 |
| C | -1.0931 | -3.1753 | 1.0432  | C | 0.4265  | -3.4406 | -0.9066 |
| C | 3.0748  | -4.3575 | -1.755  | C | -4.1313 | -4.1901 | 1.281   |
| C | 4.6051  | -0.7488 | 1.5258  | C | -4.7702 | -0.2181 | -1.8794 |
| O | 5.2694  | -1.4728 | 2.2552  | O | -5.4098 | -0.7996 | -2.7455 |
| C | -5.4345 | -2.7073 | 1.8033  | C | 6.8492  | -1.8348 | -1.7019 |
| C | -4.6587 | -1.4651 | 1.44    | C | 5.8951  | -0.8041 | -1.1414 |
| C | -4.5572 | -0.9808 | 0.179   | C | 5.1678  | -0.9885 | -0.0114 |
| C | -5.2022 | -1.7114 | -1.0144 | C | 5.2349  | -2.3137 | 0.7754  |
| C | -5.7346 | -3.1228 | -0.6341 | C | 5.9424  | -3.4423 | -0.0252 |
| C | -3.7802 | 0.2705  | -0.2096 | C | 4.2331  | 0.0445  | 0.6068  |
| C | -2.7028 | -0.0267 | -1.2725 | C | 2.8141  | -0.5072 | 0.8536  |
| C | -3.3561 | -0.6693 | -2.5078 | C | 2.8855  | -1.7761 | 1.7172  |
| C | -4.149  | -1.9213 | -2.1339 | C | 3.8027  | -2.8227 | 1.0871  |
| C | -1.8583 | 1.188   | -1.5991 | C | 1.9193  | 0.5729  | 1.4206  |
| C | -1.2393 | 1.4461  | -2.7501 | C | 1.2735  | 0.576   | 2.5853  |
| O | -1.6754 | 2.1077  | -0.5665 | O | 1.739   | 1.6843  | 0.5967  |
| C | -6.3843 | -0.8711 | -1.5493 | C | 6.0122  | -2.0855 | 2.0932  |
| C | -4.0051 | -0.8183 | 2.617   | C | 5.8548  | 0.4496  | -1.9606 |

|   |         |         |         |   |         |         |         |
|---|---------|---------|---------|---|---------|---------|---------|
| O | -3.744  | -1.4434 | 3.6396  | O | 6.4553  | 0.5607  | -3.0244 |
| O | 4.5851  | -3.4372 | 0.3869  | O | -5.238  | -2.9577 | -0.9566 |
| C | -6.4184 | -3.1385 | 0.7234  | C | 7.1976  | -2.9511 | -0.7262 |
| O | 0.6471  | -0.5897 | 2.7264  | O | -0.6832 | -0.5223 | -2.5855 |
| H | -0.9704 | -1.7324 | 3.1843  | H | 0.8591  | -1.8128 | -2.8632 |
| H | -2.3302 | 6.1153  | 0.0243  | H | 2.6446  | 5.6541  | 0.9135  |
| H | -2.6574 | 4.5416  | 0.7151  | H | 2.876   | 4.249   | -0.1034 |
| H | -2.5752 | 4.2995  | -1.6752 | H | 2.7449  | 3.5034  | 2.1798  |
| H | -1.0662 | 5.1937  | -1.7955 | H | 1.2915  | 4.442   | 2.4904  |
| H | -0.9156 | 5.6617  | 2.0239  | H | 1.2349  | 5.738   | -1.1419 |
| H | 0.0197  | 6.0083  | 0.5832  | H | 0.3058  | 5.8377  | 0.3403  |
| H | 0.6768  | 1.2478  | 0.4036  | H | -0.7126 | 1.2095  | -0.5001 |
| H | 1.5557  | 1.668   | -1.0586 | H | -1.5529 | 1.3722  | 1.0334  |
| H | 3.2415  | 2.8888  | 0.142   | H | -3.1187 | 2.9879  | 0.1487  |
| H | 1.8807  | 2.2482  | 2.7975  | H | -1.7998 | 2.7687  | -2.5945 |
| H | 3.2976  | 3.2452  | 2.5288  | H | -3.1451 | 3.7944  | -2.1312 |
| H | 2.0345  | 4.9741  | 1.4467  | H | -1.7658 | 5.1628  | -0.7078 |
| H | 1.26    | 4.5843  | 2.9659  | H | -1.013  | 5.0475  | -2.283  |
| H | -0.2879 | 1.9909  | 2.2305  | H | 0.3451  | 2.2491  | -2.1248 |
| H | -0.8396 | 3.4086  | 3.1124  | H | 0.9839  | 3.7841  | -2.6998 |
| H | -1.7419 | 2.8328  | 1.7273  | H | 1.8521  | 2.8783  | -1.4807 |
| H | 1.4581  | 4.0233  | -1.7881 | H | -1.2867 | 3.4815  | 2.2413  |
| H | 4.2252  | 0.9866  | 2.9096  | H | -3.996  | 1.5436  | -3.0523 |
| H | 4.3979  | -0.327  | -2.6128 | H | -5.0811 | -0.0846 | 2.2717  |
| H | 6.0042  | -0.9796 | -2.886  | H | -6.7742 | -0.5467 | 2.2881  |
| H | 6.2674  | -1.5456 | -0.5064 | H | -6.7802 | -0.9239 | -0.142  |
| H | 5.8725  | 0.1566  | -0.7093 | H | -6.2146 | 0.6975  | 0.2403  |
| H | 5.3265  | -3.2077 | -2.2997 | H | -6.287  | -2.8024 | 1.6269  |
| H | 4.2427  | -2.5958 | -3.5341 | H | -5.3115 | -2.4054 | 3.0282  |
| H | 2.1597  | -3.7676 | 0.9018  | H | -2.8255 | -3.5711 | -1.1922 |
| H | 2.549   | -2.3726 | 1.8364  | H | -2.9182 | -2.087  | -2.0637 |
| H | 1.2079  | -0.9259 | 0.3047  | H | -1.6191 | -0.913  | -0.2893 |
| H | 0.5133  | -3.4066 | -1.2979 | H | -1.4329 | -3.5347 | 1.2247  |
| H | -0.0287 | -1.7646 | -1.5722 | H | -0.7474 | -1.9832 | 1.6626  |
| H | 1.8032  | -2.3957 | -3.093  | H | -2.8252 | -2.4859 | 2.906   |
| H | 2.2045  | -1.0083 | -2.1153 | H | -2.9338 | -1.0027 | 1.9967  |
| H | -1.8897 | -3.3113 | 1.7709  | H | 1.2891  | -3.6526 | -1.5325 |
| H | -1.1431 | -3.8111 | 0.1659  | H | 0.2503  | -4.1412 | -0.097  |
| H | 2.2788  | -4.7473 | -1.1153 | H | -3.3053 | -4.6371 | 0.7218  |
| H | 2.8017  | -4.5857 | -2.7922 | H | -4.0302 | -4.511  | 2.3246  |
| H | 3.9786  | -4.9345 | -1.5291 | H | -5.0561 | -4.6363 | 0.8982  |
| H | -4.7234 | -3.5209 | 1.9954  | H | 6.3963  | -2.2704 | -2.602  |
| H | -5.9983 | -2.5464 | 2.7305  | H | 7.7879  | -1.3597 | -2.0123 |
| H | -4.9076 | -3.8456 | -0.6033 | H | 5.2641  | -3.8495 | -0.7878 |
| H | -6.4284 | -3.4907 | -1.4005 | H | 6.1945  | -4.281  | 0.6359  |
| H | -4.4797 | 1.0303  | -0.58   | H | 4.6691  | 0.3883  | 1.554   |
| H | -3.2933 | 0.7218  | 0.6566  | H | 4.149   | 0.9419  | -0.0082 |

|             |                  |                  |                  |              |                  |                  |                  |
|-------------|------------------|------------------|------------------|--------------|------------------|------------------|------------------|
| H           | -2.0154          | -0.7619          | -0.8336          | H            | 2.3867           | -0.7919          | -0.1185          |
| H           | -4.0095          | 0.0524           | -3.013           | H            | 3.2383           | -1.5385          | 2.728            |
| H           | -2.5903          | -0.9625          | -3.2363          | H            | 1.8843           | -2.2102          | 1.8303           |
| H           | -4.6334          | -2.3186          | -3.0352          | H            | 3.8506           | -3.6977          | 1.7481           |
| H           | -3.424           | -2.684           | -1.8163          | H            | 3.3276           | -3.1669          | 0.1588           |
| H           | -1.191           | 0.8994           | -3.672           | H            | 1.2252           | -0.1469          | 3.3766           |
| H           | -6.0678          | 0.1057           | -1.928           | H            | 5.5166           | -1.3686          | 2.7551           |
| H           | -6.8884          | -1.3846          | -2.3763          | H            | 6.1142           | -3.021           | 2.6554           |
| H           | -7.1319          | -0.6861          | -0.7699          | H            | 7.0204           | -1.6997          | 1.9065           |
| H           | -3.7491          | 0.2461           | 2.5266           | H            | 5.2562           | 1.2843           | -1.5763          |
| H           | 4.8786           | -3.185           | 1.2885           | H            | -5.3813          | -2.6128          | -1.8638          |
| H           | -7.292           | -2.4764          | 0.7212           | H            | 7.933            | -2.5965          | 0.0049           |
| H           | -6.7878          | -4.1464          | 0.945            | H            | 7.6711           | -3.7775          | -1.2689          |
| <b>5a-9</b> | <b>X axis(Å)</b> | <b>Y axis(Å)</b> | <b>Z axis(Å)</b> | <b>5a-10</b> | <b>X axis(Å)</b> | <b>Y axis(Å)</b> | <b>Z axis(Å)</b> |
| C           | -1.8397          | 5.069            | 0.6834           | C            | -2.7566          | 5.0351           | -0.2491          |
| C           | -1.6313          | 4.6128           | -0.7597          | C            | -2.3153          | 4.2385           | -1.4768          |
| C           | -0.815           | 3.315            | -0.8682          | C            | -1.5807          | 2.9402           | -1.1057          |
| C           | 0.5196           | 3.4008           | -0.0706          | C            | -0.3927          | 3.2128           | -0.1376          |
| C           | 0.2638           | 3.7923           | 1.4304           | C            | -0.8859          | 3.9561           | 1.16             |
| C           | -0.5326          | 5.1241           | 1.4785           | C            | -1.6184          | 5.264            | 0.7497           |
| C           | 1.3745           | 2.1169           | -0.1474          | C            | 0.4389           | 1.9578           | 0.2356           |
| C           | 2.7268           | 2.2552           | 0.5937           | C            | 1.646            | 2.3233           | 1.1294           |
| C           | 2.5408           | 2.7691           | 2.0351           | C            | 1.2091           | 3.1144           | 2.3766           |
| C           | 1.6338           | 3.9996           | 2.1288           | C            | 0.3479           | 4.3298           | 2.0256           |
| C           | -0.5194          | 2.7303           | 2.2454           | C            | -1.844           | 3.1184           | 2.0483           |
| C           | -0.5813          | 3.0008           | -2.3273          | C            | -1.1222          | 2.2394           | -2.3643          |
| O           | 0.1406           | 3.6258           | -3.0924          | O            | -0.2535          | 2.6348           | -3.1296          |
| O           | 1.3212           | 4.4678           | -0.6429          | O            | 0.5229           | 4.1218           | -0.8061          |
| C           | 3.5469           | 0.9785           | 0.5451           | C            | 2.5164           | 1.1254           | 1.4443           |
| O           | 3.1289           | -0.0189          | -0.3408          | O            | 3.216            | 0.5884           | 0.3576           |
| C           | 4.6327           | 0.7184           | 1.2726           | C            | 2.7738           | 0.5923           | 2.6382           |
| C           | 4.0823           | -1.2703          | -2.8608          | C            | 5.9978           | 0.9724           | -0.5714          |
| C           | 4.9438           | -0.8841          | -1.6655          | C            | 5.5658           | 0.7207           | 0.8684           |
| C           | 4.1582           | -1.0352          | -0.3563          | C            | 4.3159           | -0.1737          | 0.91             |
| C           | 3.6235           | -2.4974          | -0.1608          | C            | 4.583            | -1.55            | 0.2126           |
| C           | 2.8197           | -3.0143          | -1.4138          | C            | 5.1255           | -1.3763          | -1.2543          |
| C           | 3.5813           | -2.7032          | -2.7342          | C            | 6.2816           | -0.3355          | -1.2997          |
| C           | 2.7856           | -2.6888          | 1.1322           | C            | 3.3721           | -2.5128          | 0.2226           |
| C           | 1.3484           | -2.1255          | 1.0863           | C            | 2.2399           | -2.1788          | -0.7678          |
| C           | 0.6107           | -2.6215          | -0.1673          | C            | 2.7867           | -1.9107          | -2.1809          |
| C           | 1.4066           | -2.3829          | -1.4514          | C            | 3.9789           | -0.9507          | -2.2039          |
| C           | 0.5217           | -2.4084          | 2.3345           | C            | 1.1512           | -3.2446          | -0.8297          |
| C           | -0.6879          | -1.5598          | 2.5594           | C            | -0.1749          | -2.8423          | -1.3779          |
| C           | 0.7726           | -3.3226          | 3.2865           | C            | 1.2314           | -4.5214          | -0.4183          |
| C           | 2.6548           | -4.5633          | -1.3894          | C            | 5.7408           | -2.6979          | -1.802           |
| C           | 5.0262           | -0.5977          | 0.8012           | C            | 3.8532           | -0.3372          | 2.3396           |
| O           | 5.9365           | -1.241           | 1.3053           | O            | 4.3134           | -1.1128          | 3.166            |



|   |         |         |         |   |         |         |         |
|---|---------|---------|---------|---|---------|---------|---------|
| C | -5.4325 | -2.7464 | 1.5213  | C | -4.8191 | -4.2434 | 1.0287  |
| C | -4.6777 | -1.4711 | 1.229   | C | -3.8529 | -3.0896 | 0.9531  |
| C | -4.5106 | -0.9683 | -0.0191 | C | -4.2316 | -1.8172 | 0.6883  |
| C | -5.0235 | -1.7198 | -1.2635 | C | -5.7159 | -1.4148 | 0.5814  |
| C | -5.4993 | -3.1629 | -0.9336 | C | -6.6846 | -2.5957 | 0.8726  |
| C | -3.7905 | 0.3342  | -0.3483 | C | -3.2719 | -0.6877 | 0.3431  |
| C | -2.6209 | 0.1169  | -1.3289 | C | -3.5373 | -0.1866 | -1.0928 |
| C | -3.138  | -0.5553 | -2.612  | C | -5.0044 | 0.2302  | -1.2786 |
| C | -3.8785 | -1.8566 | -2.3024 | C | -5.9682 | -0.8848 | -0.8547 |
| C | -1.84   | 1.3909  | -1.5766 | C | -2.6108 | 0.941   | -1.4605 |
| C | -1.303  | 1.803   | -2.7238 | C | -1.8391 | 0.9896  | -2.5445 |
| O | -1.6203 | 2.1916  | -0.4562 | O | -2.5304 | 1.9987  | -0.5622 |
| C | -6.2098 | -0.9441 | -1.8814 | C | -6.0604 | -0.3147 | 1.615   |
| C | -4.1285 | -0.8247 | 2.4631  | C | -2.4225 | -3.4682 | 1.1423  |
| O | -4.1442 | -1.3805 | 3.5583  | O | -2.0109 | -4.6144 | 0.9996  |
| O | 4.7702  | -3.377  | -0.0364 | O | 5.6334  | -2.2219 | 0.9551  |
| C | -6.2938 | -3.226  | 0.36    | C | -6.1572 | -3.9297 | 0.3685  |
| O | -1.0338 | -0.6772 | 1.7822  | O | -0.4644 | -1.6791 | -1.6315 |
| H | -1.2639 | -1.7718 | 3.4766  | H | -0.9038 | -3.657  | -1.5297 |
| H | -2.3015 | 6.0636  | 0.6826  | H | -3.1507 | 6.0058  | -0.5731 |
| H | -2.5567 | 4.4048  | 1.1784  | H | -3.5904 | 4.5204  | 0.241   |
| H | -2.6166 | 4.4825  | -1.2254 | H | -3.2049 | 4.0135  | -2.0792 |
| H | -1.1303 | 5.4176  | -1.3131 | H | -1.6717 | 4.8726  | -2.0999 |
| H | -0.7586 | 5.3923  | 2.5184  | H | -2.0201 | 5.7663  | 1.639   |
| H | 0.081   | 5.9438  | 1.0827  | H | -0.9046 | 5.9686  | 0.3032  |
| H | 0.8152  | 1.2574  | 0.2389  | H | -0.1846 | 1.2013  | 0.7253  |
| H | 1.5978  | 1.897   | -1.1998 | H | 0.8304  | 1.4937  | -0.6788 |
| H | 3.3138  | 3.0089  | 0.0495  | H | 2.2931  | 2.9995  | 0.5513  |
| H | 3.514   | 3.0378  | 2.465   | H | 0.6587  | 2.4657  | 3.0683  |
| H | 2.1431  | 1.9677  | 2.67    | H | 2.0948  | 3.4641  | 2.9228  |
| H | 2.1601  | 4.8574  | 1.6905  | H | 0.9733  | 5.0645  | 1.5022  |
| H | 1.4858  | 4.2521  | 3.1868  | H | 0.0271  | 4.8201  | 2.9537  |
| H | -0.0384 | 1.7503  | 2.2268  | H | -1.4421 | 2.1307  | 2.2884  |
| H | -0.5877 | 3.0305  | 3.2982  | H | -2.028  | 3.6302  | 3.0009  |
| H | -1.5458 | 2.5904  | 1.9012  | H | -2.8257 | 2.9634  | 1.5967  |
| H | 1.3779  | 4.3309  | -1.6121 | H | 0.7593  | 3.7367  | -1.6768 |
| H | 5.1448  | 1.3005  | 2.0143  | H | 2.4054  | 0.8247  | 3.6185  |
| H | 3.2382  | -0.5789 | -2.9621 | H | 5.2298  | 1.544   | -1.1048 |
| H | 4.6735  | -1.1739 | -3.779  | H | 6.9024  | 1.5918  | -0.5749 |
| H | 5.8512  | -1.5008 | -1.6449 | H | 6.3883  | 0.2633  | 1.4324  |
| H | 5.2745  | 0.1536  | -1.8014 | H | 5.3689  | 1.6916  | 1.3408  |
| H | 4.4529  | -3.367  | -2.8173 | H | 7.1831  | -0.774  | -0.8499 |
| H | 2.9439  | -2.934  | -3.5976 | H | 6.5439  | -0.1119 | -2.3418 |
| H | 2.7516  | -3.7647 | 1.3485  | H | 3.7575  | -3.5203 | 0.0207  |
| H | 3.3201  | -2.2622 | 1.9908  | H | 2.9586  | -2.5887 | 1.2366  |
| H | 1.4317  | -1.0362 | 1.022   | H | 1.764   | -1.2594 | -0.4075 |
| H | 0.3712  | -3.6872 | -0.0672 | H | 3.0712  | -2.8567 | -2.6586 |

|             |                  |                  |                  |             |                  |                  |                  |
|-------------|------------------|------------------|------------------|-------------|------------------|------------------|------------------|
| H           | -0.3546          | -2.1149          | -0.2673          | H           | 1.9958           | -1.4879          | -2.8136          |
| H           | 0.8361           | -2.7941          | -2.2946          | H           | 4.3531           | -0.8891          | -3.2344          |
| H           | 1.4614           | -1.3051          | -1.6352          | H           | 3.6235           | 0.0566           | -1.9671          |
| H           | 0.1318           | -3.4508          | 4.1553           | H           | 0.3888           | -5.2078          | -0.4759          |
| H           | 1.6266           | -3.99            | 3.2375           | H           | 2.1353           | -4.942           | 0.0082           |
| H           | 2.1799           | -4.9256          | -0.4741          | H           | 5.0344           | -3.5319          | -1.7936          |
| H           | 2.0394           | -4.9011          | -2.2318          | H           | 6.0766           | -2.5684          | -2.8378          |
| H           | 3.62             | -5.0753          | -1.4744          | H           | 6.6148           | -3.0101          | -1.2193          |
| H           | -4.7073          | -3.5278          | 1.7826           | H           | -4.4067          | -5.1316          | 0.536            |
| H           | -6.0881          | -2.6114          | 2.3905           | H           | -4.9754          | -4.5029          | 2.0832           |
| H           | -4.6358          | -3.8351          | -0.8338          | H           | -7.67            | -2.3995          | 0.4313           |
| H           | -6.1024          | -3.5661          | -1.7567          | H           | -6.8516          | -2.6884          | 1.9549           |
| H           | -4.5111          | 1.0431           | -0.7758          | H           | -3.3828          | 0.12             | 1.076            |
| H           | -3.4129          | 0.8266           | 0.5481           | H           | -2.2236          | -0.9886          | 0.4057           |
| H           | -1.9178          | -0.5773          | -0.8514          | H           | -3.3459          | -1.0265          | -1.7773          |
| H           | -3.7961          | 0.1272           | -3.1634          | H           | -5.2205          | 1.1438           | -0.7113          |
| H           | -2.3007          | -0.7926          | -3.2801          | H           | -5.1902          | 0.4763           | -2.332           |
| H           | -4.2695          | -2.2751          | -3.2388          | H           | -6.9968          | -0.5126          | -0.9445          |
| H           | -3.1341          | -2.5766          | -1.934           | H           | -5.8758          | -1.7074          | -1.5762          |
| H           | -1.2969          | 1.3672           | -3.7039          | H           | -1.705           | 0.285            | -3.3425          |
| H           | -5.9223          | 0.0496           | -2.2385          | H           | -5.5062          | 0.615            | 1.4584           |
| H           | -6.625           | -1.4822          | -2.7414          | H           | -7.1263          | -0.0612          | 1.5717           |
| H           | -7.0194          | -0.8023          | -1.157           | H           | -5.8402          | -0.6518          | 2.6351           |
| H           | -3.6899          | 0.1752           | 2.358            | H           | -1.7344          | -2.6584          | 1.4258           |
| H           | 5.3585           | -3.0285          | 0.6669           | H           | 5.3527           | -2.2884          | 1.8925           |
| H           | -7.2007          | -2.6151          | 0.2846           | H           | -6.8749          | -4.7257          | 0.5978           |
| H           | -6.6228          | -4.2545          | 0.5479           | H           | -6.0453          | -3.9084          | -0.722           |
| <b>5b-1</b> | <b>X axis(Å)</b> | <b>Y axis(Å)</b> | <b>Z axis(Å)</b> | <b>5b-2</b> | <b>X axis(Å)</b> | <b>Y axis(Å)</b> | <b>Z axis(Å)</b> |
| C           | 2.3922           | 4.991            | 1.6494           | C           | 3.1163           | 4.334            | 2.2651           |
| C           | 2.5617           | 4.6759           | 0.1641           | C           | 3.4701           | 4.2931           | 0.7782           |
| C           | 1.7443           | 3.4503           | -0.2801          | C           | 2.7438           | 3.1727           | 0.0199           |
| C           | 0.2449           | 3.5921           | 0.1131           | C           | 1.2051           | 3.2158           | 0.2644           |
| C           | 0.0876           | 3.839            | 1.6611           | C           | 0.8789           | 3.1464           | 1.8004           |
| C           | 0.9228           | 5.0844           | 2.0673           | C           | 1.6056           | 4.3141           | 2.5216           |
| C           | -0.6534          | 2.4142           | -0.3378          | C           | 0.4228           | 2.1271           | -0.5028          |
| C           | -2.1344          | 2.6635           | 0.019            | C           | -1.1069          | 2.1999           | -0.2746          |
| C           | -2.3316          | 3.0016           | 1.5064           | C           | -1.4512          | 2.2489           | 1.2255           |
| C           | -1.4061          | 4.1238           | 1.9784           | C           | -0.6528          | 3.3089           | 1.9891           |
| C           | 0.5348           | 2.6418           | 2.5421           | C           | 1.2958           | 1.8168           | 2.4861           |
| C           | 1.9236           | 3.2493           | -1.7665          | C           | 3.0786           | 3.2537           | -1.4519          |
| O           | 1.4743           | 3.9691           | -2.6481          | O           | 2.7504           | 4.1504           | -2.2164          |
| O           | -0.2763          | 4.7777           | -0.5466          | O           | 0.704            | 4.491            | -0.2117          |
| C           | -3.0293          | 1.515            | -0.3724          | C           | -1.8663          | 1.0946           | -0.9894          |
| O           | -2.8652          | 0.3086           | 0.3112           | O           | -3.2235          | 0.9796           | -0.6733          |
| C           | -4.0064          | 1.5793           | -1.2748          | C           | -1.3859          | 0.2289           | -1.8815          |
| C           | -4.3853          | -1.08            | 2.4527           | C           | -5.9023          | 1.3137           | -1.8692          |
| C           | -4.9818          | -0.3722          | 1.2427           | C           | -4.6811          | 0.7227           | -2.5641          |

|   |         |         |          |   |         |         |         |
|---|---------|---------|----------|---|---------|---------|---------|
| C | -4.0455 | -0.4826 | 0.0298   | C | -3.7916 | -0.016  | -1.557  |
| C | -3.7546 | -1.9783 | -0.3385  | C | -4.5747 | -1.1666 | -0.8278 |
| C | -3.2315 | -2.8051 | 0.8967   | C | -5.9071 | -0.6492 | -0.1671 |
| C | -4.1144 | -2.5488 | 2.1517   | C | -6.7139 | 0.234   | -1.163  |
| C | -2.7983 | -2.1456 | -1.5454  | C | -3.7209 | -1.9389 | 0.2106  |
| C | -1.3098 | -1.8951 | -1.2458  | C | -3.4577 | -1.1864 | 1.526   |
| C | -0.8321 | -2.6564 | 1.00E-04 | C | -4.7669 | -0.6564 | 2.136   |
| C | -1.7542 | -2.453  | 1.2031   | C | -5.6002 | 0.1434  | 1.1293  |
| C | -0.4597 | -2.2156 | -2.4642  | C | -2.6174 | -2.0397 | 2.4617  |
| C | 0.2591  | -1.1014 | -3.1417  | C | -1.1491 | -2.1057 | 2.1875  |
| C | -0.3043 | -3.4392 | -2.9979  | C | -3.0462 | -2.7257 | 3.5339  |
| C | -3.3188 | -4.3379 | 0.6354   | C | -6.8571 | -1.8273 | 0.2012  |
| C | -4.6401 | 0.2794  | -1.135   | C | -2.559  | -0.5427 | -2.2532 |
| O | -5.5372 | -0.1101 | -1.87    | O | -2.5155 | -1.4903 | -3.0262 |
| C | 3.7886  | -3.9311 | 2.173    | C | 3.7469  | -4.6837 | 1.0989  |
| C | 3.1342  | -2.6319 | 1.7608   | C | 3.3108  | -3.2488 | 0.9116  |
| C | 3.333   | -2.0382 | 0.5575   | C | 3.6927  | -2.4773 | -0.1366 |
| C | 4.2866  | -2.6494 | -0.4894  | C | 4.6567  | -3.0099 | -1.2162 |
| C | 5.198   | -3.7496 | 0.1203   | C | 5.358   | -4.3244 | -0.7761 |
| C | 2.6543  | -0.7562 | 0.0938   | C | 3.2224  | -1.0515 | -0.3869 |
| C | 3.6476  | 0.2969  | -0.4294  | C | 4.3896  | -0.0684 | -0.6078 |
| C | 4.5086  | -0.2999 | -1.5511  | C | 5.2759  | -0.5554 | -1.7623 |
| C | 5.2283  | -1.5597 | -1.0698  | C | 5.7804  | -1.9744 | -1.4966 |
| C | 2.9053  | 1.5547  | -0.8149  | C | 3.844   | 1.3298  | -0.7818 |
| C | 2.7194  | 2.0623  | -2.0323  | C | 3.8023  | 2.0693  | -1.8882 |
| O | 2.3516  | 2.2555  | 0.2561   | O | 3.3085  | 1.8918  | 0.3755  |
| C | 3.449   | -3.2784 | -1.6282  | C | 3.8623  | -3.2855 | -2.5151 |
| C | 2.2242  | -2.0818 | 2.8165   | C | 2.3953  | -2.7712 | 1.9971  |
| O | 2.0761  | -2.6226 | 3.9077   | O | 2.0331  | -3.4895 | 2.9249  |
| O | -5.0089 | -2.593  | -0.7287  | O | -4.9738 | -2.1381 | -1.8278 |
| C | 4.4286  | -4.6989 | 1.0236   | C | 4.3913  | -5.3057 | -0.1337 |
| O | 0.278   | 0.0439  | -2.7084  | O | -0.6133 | -1.5013 | 1.2638  |
| H | 0.8003  | -1.3691 | -4.0651  | H | -0.5619 | -2.737  | 2.8757  |
| H | 2.9078  | 4.2313  | 2.2472   | H | 3.5967  | 3.4933  | 2.7777  |
| H | 2.8908  | 5.9413  | 1.8745   | H | 3.5435  | 5.2402  | 2.7109  |
| H | 2.2691  | 5.5571  | -0.4214  | H | 3.2271  | 5.2663  | 0.3323  |
| H | 3.6294  | 4.5143  | -0.0331  | H | 4.557   | 4.1719  | 0.6851  |
| H | 0.4923  | 5.9876  | 1.6154   | H | 1.186   | 5.2751  | 2.1968  |
| H | 0.8698  | 5.2367  | 3.1529   | H | 1.4283  | 4.2585  | 3.6032  |
| H | -0.5958 | 2.3048  | -1.428   | H | 0.5996  | 2.2523  | -1.5791 |
| H | -0.3035 | 1.468   | 0.09     | H | 0.7937  | 1.1313  | -0.235  |
| H | -2.4644 | 3.5435  | -0.5519  | H | -1.4624 | 3.1417  | -0.7162 |
| H | -3.3718 | 3.3069  | 1.6804   | H | -2.5194 | 2.464   | 1.3573  |
| H | -2.1734 | 2.1121  | 2.1285   | H | -1.2812 | 1.2687  | 1.683   |
| H | -1.5446 | 4.2706  | 3.0573   | H | -0.9119 | 3.2508  | 3.0541  |
| H | -1.724  | 5.0629  | 1.5073   | H | -0.9774 | 4.3035  | 1.6575  |
| H | 0.0543  | 1.7027  | 2.2554   | H | 0.9157  | 0.9346  | 1.9653  |

|             |                  |                  |                  |             |                  |                  |                  |
|-------------|------------------|------------------|------------------|-------------|------------------|------------------|------------------|
| H           | 1.6124           | 2.4692           | 2.5191           | H           | 2.3774           | 1.6943           | 2.5695           |
| H           | 0.2791           | 2.8242           | 3.5931           | H           | 0.907            | 1.7769           | 3.511            |
| H           | -0.0752          | 4.7094           | -1.5044          | H           | 1.0238           | 4.6359           | -1.1265          |
| H           | -4.3282          | 2.3824           | -1.9092          | H           | -0.4011          | 0.0921           | -2.2832          |
| H           | -3.4633          | -0.5801          | 2.7702           | H           | -5.597           | 2.0862           | -1.1543          |
| H           | -5.083           | -1.0064          | 3.2952           | H           | -6.5348          | 1.8132           | -2.6124          |
| H           | -5.9667          | -0.7962          | 1.0099           | H           | -4.9988          | 0.0487           | -3.3693          |
| H           | -5.1509          | 0.6789           | 1.5097           | H           | -4.1267          | 1.5409           | -3.0416          |
| H           | -5.0861          | -3.0446          | 2.0212           | H           | -7.157           | -0.405           | -1.9391          |
| H           | -3.6556          | -3.0134          | 3.034            | H           | -7.5581          | 0.7067           | -0.6445          |
| H           | -2.9301          | -3.1586          | -1.9499          | H           | -4.213           | -2.8956          | 0.4361           |
| H           | -3.1181          | -1.497           | -2.3715          | H           | -2.7724          | -2.2439          | -0.2492          |
| H           | -1.1924          | -0.8313          | -1.0203          | H           | -2.8591          | -0.3006          | 1.3096           |
| H           | 0.1739           | -2.3199          | 0.272            | H           | -4.5374          | -0.0126          | 2.9949           |
| H           | -0.7373          | -3.7287          | -0.2058          | H           | -5.3778          | -1.4774          | 2.5264           |
| H           | -1.386           | -3.0728          | 2.0313           | H           | -6.5388          | 0.4413           | 1.6149           |
| H           | -1.6578          | -1.4195          | 1.5501           | H           | -5.0803          | 1.0799           | 0.9055           |
| H           | 0.3107           | -3.627           | -3.8732          | H           | -2.3747          | -3.3065          | 4.1611           |
| H           | -0.8006          | -4.3056          | -2.5687          | H           | -4.0909          | -2.7433          | 3.8255           |
| H           | -2.7809          | -4.6459          | -0.265           | H           | -6.387           | -2.5618          | 0.8602           |
| H           | -2.8953          | -4.8995          | 1.4767           | H           | -7.7537          | -1.4571          | 0.7126           |
| H           | -4.3563          | -4.6711          | 0.5193           | H           | -7.1979          | -2.3673          | -0.6894          |
| H           | 4.5552           | -3.7057          | 2.9256           | H           | 4.4595           | -4.7194          | 1.9332           |
| H           | 3.0569           | -4.5952          | 2.6494           | H           | 2.8923           | -5.3112          | 1.3803           |
| H           | 6.0017           | -3.2907          | 0.7126           | H           | 6.1539           | -4.105           | -0.051           |
| H           | 5.6937           | -4.3204          | -0.675           | H           | 5.85             | -4.8012          | -1.6332          |
| H           | 1.9433           | -1.0131          | -0.6994          | H           | 2.5648           | -1.0521          | -1.2666          |
| H           | 2.0513           | -0.2985          | 0.8796           | H           | 2.6021           | -0.6702          | 0.4253           |
| H           | 4.3255           | 0.5688           | 0.393            | H           | 5.0102           | -0.0582          | 0.3002           |
| H           | 3.8979           | -0.536           | -2.4306          | H           | 4.7307           | -0.53            | -2.7132          |
| H           | 5.2576           | 0.4323           | -1.8781          | H           | 6.1389           | 0.1121           | -1.8787          |
| H           | 5.814            | -1.9741          | -1.9005          | H           | 6.3875           | -2.3019          | -2.3504          |
| H           | 5.9557           | -1.2563          | -0.3041          | H           | 6.4622           | -1.9297          | -0.6359          |
| H           | 3.0164           | 1.7146           | -3.0023          | H           | 4.1309           | 1.8702           | -2.89            |
| H           | 4.094            | -3.78            | -2.3588          | H           | 4.5111           | -3.7138          | -3.2879          |
| H           | 2.7389           | -4.0207          | -1.2476          | H           | 3.0399           | -3.9891          | -2.3458          |
| H           | 2.8648           | -2.5345          | -2.1773          | H           | 3.4192           | -2.3782          | -2.9371          |
| H           | 1.6783           | -1.1601          | 2.5821           | H           | 2.0531           | -1.7311          | 1.9456           |
| H           | -5.4145          | -2.0485          | -1.437           | H           | -4.1769          | -2.4133          | -2.3286          |
| H           | 3.6593           | -5.2328          | 0.4541           | H           | 3.6182           | -5.6078          | -0.8493          |
| H           | 5.1039           | -5.4633          | 1.4251           | H           | 4.9226           | -6.2206          | 0.1535           |
| <b>5b-3</b> | <b>X axis(Å)</b> | <b>Y axis(Å)</b> | <b>Z axis(Å)</b> | <b>5b-4</b> | <b>X axis(Å)</b> | <b>Y axis(Å)</b> | <b>Z axis(Å)</b> |
| C           | -0.5416          | 5.703            | -0.9438          | C           | -2.1227          | 4.6308           | -1.5217          |
| C           | -0.962           | 5.0875           | 0.3887           | C           | -2.2212          | 4.3173           | -0.0287          |
| C           | -0.4937          | 3.631            | 0.5517           | C           | -1.3449          | 3.123            | 0.383            |
| C           | 1.0358           | 3.4828           | 0.2986           | C           | 0.1303           | 3.3161           | -0.0743          |
| C           | 1.4256           | 4.0526           | -1.1175          | C           | 0.2182           | 3.5563           | -1.6272          |

|   |         |         |         |   |         |         |         |
|---|---------|---------|---------|---|---------|---------|---------|
| C | 0.952   | 5.5277  | -1.2249 | C | -0.6756 | 4.7702  | -2.0038 |
| C | 1.5717  | 2.0392  | 0.4648  | C | 1.0831  | 2.1741  | 0.3483  |
| C | 3.1     | 1.9572  | 0.2414  | C | 2.5401  | 2.4684  | -0.0618 |
| C | 3.5432  | 2.617   | -1.0764 | C | 2.6715  | 2.7988  | -1.558  |
| C | 2.9697  | 4.0205  | -1.2629 | C | 1.69    | 3.886   | -2.0039 |
| C | 0.8237  | 3.2598  | -2.309  | C | -0.2237 | 2.3398  | -2.4835 |
| C | -0.8896 | 3.1471  | 1.9257  | C | -1.4404 | 2.9159  | 1.8781  |
| O | -0.398  | 3.5136  | 2.9847  | O | -1.0058 | 3.6702  | 2.7374  |
| O | 1.7383  | 4.2941  | 1.277   | O | 0.6351  | 4.5245  | 0.5563  |
| C | 3.6248  | 0.5424  | 0.2642  | C | 3.4706  | 1.3489  | 0.3299  |
| O | 2.9185  | -0.4091 | -0.47   | O | 3.4225  | 0.1761  | -0.4262 |
| C | 4.7412  | 0.1407  | 0.8687  | C | 4.362   | 1.4053  | 1.3177  |
| C | 3.2762  | -1.7376 | -3.0656 | C | 5.1992  | -1.0727 | -2.4613 |
| C | 4.3736  | -1.5064 | -2.0321 | C | 5.6435  | -0.4011 | -1.1687 |
| C | 3.7915  | -1.5539 | -0.6123 | C | 4.5946  | -0.5925 | -0.0625 |
| C | 3.1104  | -2.935  | -0.325  | C | 4.3124  | -2.1104 | 0.2121  |
| C | 2.02    | -3.2921 | -1.402  | C | 3.9512  | -2.8961 | -1.1053 |
| C | 2.5719  | -3.0711 | -2.8408 | C | 4.9521  | -2.5604 | -2.2478 |
| C | 2.5157  | -3.0617 | 1.0975  | C | 3.2358  | -2.353  | 1.3002  |
| C | 1.2086  | -2.2846 | 1.341   | C | 1.7799  | -2.1358 | 0.8524  |
| C | 0.1722  | -2.5714 | 0.2416  | C | 1.4676  | -2.8611 | -0.4678 |
| C | 0.7394  | -2.449  | -1.1765 | C | 2.5044  | -2.5711 | -1.554  |
| C | 0.6079  | -2.5248 | 2.7209  | C | 0.8388  | -2.5046 | 1.9894  |
| C | -0.2924 | -1.4702 | 3.2663  | C | 0.4106  | -1.414  | 2.9121  |
| C | 0.8204  | -3.5762 | 3.5303  | C | 0.3438  | -3.7267 | 2.2478  |
| C | 1.6199  | -4.7958 | -1.3402 | C | 4.0618  | -4.4359 | -0.8987 |
| C | 4.866   | -1.2322 | 0.4036  | C | 5.0519  | 0.1341  | 1.1838  |
| O | 5.7394  | -1.9938 | 0.7956  | O | 5.8923  | -0.2602 | 1.9808  |
| C | -5.3134 | -3.3385 | -0.6899 | C | -7.0871 | -2.8123 | -0.3509 |
| C | -4.4401 | -2.3694 | 0.0727  | C | -6.4001 | -1.5153 | 0.0105  |
| C | -4.5224 | -1.0216 | -0.0546 | C | -5.1224 | -1.2177 | -0.3334 |
| C | -5.5252 | -0.3671 | -1.0273 | C | -4.2527 | -2.2212 | -1.1227 |
| C | -6.1338 | -1.3938 | -2.0224 | C | -4.8778 | -3.6433 | -1.1587 |
| C | -3.6751 | -0.0182 | 0.7176  | C | -4.4103 | 0.0906  | -0.0067 |
| C | -2.9611 | 0.9909  | -0.2034 | C | -3.052  | -0.137  | 0.6804  |
| C | -3.9903 | 1.7188  | -1.0788 | C | -2.1602 | -1.0409 | -0.1761 |
| C | -4.8235 | 0.7215  | -1.8828 | C | -2.8545 | -2.369  | -0.4634 |
| C | -2.083  | 1.9862  | 0.5211  | C | -2.366  | 1.1708  | 0.9733  |
| C | -1.9467 | 2.1552  | 1.8356  | C | -2.1223 | 1.669   | 2.1834  |
| O | -1.2769 | 2.7707  | -0.3041 | O | -1.9358 | 1.9069  | -0.1258 |
| C | -6.6753 | 0.2707  | -0.2124 | C | -4.0951 | -1.7157 | -2.5766 |
| C | -3.4881 | -3.0528 | 1.0044  | C | -7.2905 | -0.5808 | 0.7688  |
| O | -3.3495 | -4.2713 | 1.0368  | O | -8.3925 | -0.9157 | 1.1907  |
| O | 4.1321  | -3.9598 | -0.4246 | O | 5.5358  | -2.7088 | 0.7099  |
| C | -6.5299 | -2.6935 | -1.3415 | C | -6.372  | -3.6108 | -1.4328 |
| O | -0.6254 | -0.4837 | 2.6211  | O | 0.7268  | -0.2417 | 2.7519  |
| H | -0.6611 | -1.6305 | 4.2937  | H | -0.228  | -1.7211 | 3.7577  |

|   |         |         |         |   |         |         |         |
|---|---------|---------|---------|---|---------|---------|---------|
| H | -1.1346 | 5.2655  | -1.7543 | H | -2.6614 | 5.5631  | -1.7293 |
| H | -0.783  | 6.7727  | -0.9379 | H | -2.6376 | 3.8516  | -2.0945 |
| H | -0.5608 | 5.704   | 1.2036  | H | -1.9357 | 5.2105  | 0.5416  |
| H | -2.0554 | 5.1469  | 0.4648  | H | -3.2734 | 4.1188  | 0.2128  |
| H | 1.5133  | 6.1541  | -0.5193 | H | -0.2568 | 5.6905  | -1.5761 |
| H | 1.1756  | 5.9245  | -2.2235 | H | -0.6745 | 4.9166  | -3.0915 |
| H | 1.3711  | 1.6829  | 1.4837  | H | 1.0687  | 2.0717  | 1.4404  |
| H | 1.0426  | 1.3568  | -0.2098 | H | 0.7501  | 1.2138  | -0.061  |
| H | 3.5816  | 2.5089  | 1.0613  | H | 2.8617  | 3.365   | 0.4877  |
| H | 4.639   | 2.6822  | -1.1049 | H | 3.6939  | 3.1361  | -1.7724 |
| H | 3.2623  | 1.9898  | -1.9318 | H | 2.5186  | 1.8997  | -2.1672 |
| H | 3.2669  | 4.3987  | -2.2495 | H | 1.7823  | 4.027   | -3.0884 |
| H | 3.4381  | 4.6934  | -0.5332 | H | 1.9942  | 4.8395  | -1.5531 |
| H | 1.0404  | 2.1895  | -2.2581 | H | 0.299   | 1.419   | -2.2116 |
| H | -0.2601 | 3.3611  | -2.3905 | H | -1.2934 | 2.1321  | -2.4165 |
| H | 1.2354  | 3.6251  | -3.2578 | H | -0.0164 | 2.5242  | -3.5447 |
| H | 1.3984  | 4.0655  | 2.1683  | H | 0.4845  | 4.4544  | 1.523   |
| H | 5.4514  | 0.6787  | 1.4664  | H | 4.5808  | 2.1808  | 2.0258  |
| H | 2.5494  | -0.9177 | -3.0384 | H | 4.2975  | -0.5882 | -2.8522 |
| H | 3.7167  | -1.7263 | -4.0695 | H | 5.9764  | -0.941  | -3.2232 |
| H | 5.1673  | -2.254  | -2.1523 | H | 6.614   | -0.8047 | -0.8535 |
| H | 4.8333  | -0.5299 | -2.232  | H | 5.8019  | 0.6655  | -1.3741 |
| H | 3.2915  | -3.8666 | -3.079  | H | 5.9218  | -3.0302 | -2.0332 |
| H | 1.7599  | -3.1713 | -3.5726 | H | 4.606   | -3.0019 | -3.1912 |
| H | 2.3569  | -4.1298 | 1.2929  | H | 3.3481  | -3.3786 | 1.6799  |
| H | 3.2622  | -2.7669 | 1.8463  | H | 3.4483  | -1.7297 | 2.1787  |
| H | 1.46    | -1.2195 | 1.2961  | H | 1.6364  | -1.0715 | 0.6417  |
| H | -0.6703 | -1.8746 | 0.3308  | H | 0.4811  | -2.551  | -0.8329 |
| H | -0.2542 | -3.5726 | 0.3804  | H | 1.4031  | -3.9443 | -0.3224 |
| H | -0.0389 | -2.7572 | -1.8873 | H | 2.2486  | -3.1606 | -2.4443 |
| H | 0.9205  | -1.3917 | -1.3923 | H | 2.4103  | -1.5252 | -1.8618 |
| H | 0.3564  | -3.6663 | 4.5089  | H | -0.328  | -3.9239 | 3.0785  |
| H | 1.4573  | -4.407  | 3.2448  | H | 0.6099  | -4.5885 | 1.6438  |
| H | 1.2375  | -5.0941 | -0.3606 | H | 3.4486  | -4.7977 | -0.0693 |
| H | 0.8367  | -5.0185 | -2.0747 | H | 3.7419  | -4.9722 | -1.8    |
| H | 2.468   | -5.4509 | -1.5688 | H | 5.0931  | -4.7442 | -0.6929 |
| H | -4.7008 | -3.8185 | -1.464  | H | -7.1668 | -3.4246 | 0.5567  |
| H | -5.6735 | -4.1344 | -0.0264 | H | -8.1094 | -2.6206 | -0.6995 |
| H | -5.4085 | -1.6312 | -2.8128 | H | -4.7192 | -4.1513 | -0.1974 |
| H | -7.0067 | -0.964  | -2.5298 | H | -4.3789 | -4.2617 | -1.9154 |
| H | -4.3267 | 0.5094  | 1.4259  | H | -4.2765 | 0.6542  | -0.9392 |
| H | -2.9156 | -0.5071 | 1.3265  | H | -5.0026 | 0.7392  | 0.6421  |
| H | -2.2966 | 0.4152  | -0.865  | H | -3.2379 | -0.6523 | 1.6342  |
| H | -3.4847 | 2.3941  | -1.7807 | H | -1.8893 | -0.5507 | -1.1189 |
| H | -4.6427 | 2.3486  | -0.4618 | H | -1.2192 | -1.2333 | 0.348   |
| H | -5.5675 | 1.2728  | -2.4722 | H | -2.2024 | -2.983  | -1.0978 |
| H | -4.1536 | 0.2413  | -2.6098 | H | -2.9505 | -2.9086 | 0.4891  |

|             |                  |                  |                  |             |                  |                  |                  |
|-------------|------------------|------------------|------------------|-------------|------------------|------------------|------------------|
| H           | -2.4035          | 1.6565           | 2.6682           | H           | -2.3328          | 1.286            | 3.1629           |
| H           | -7.4339          | 0.7019           | -0.8759          | H           | -3.5155          | -2.4256          | -3.1779          |
| H           | -7.1748          | -0.4648          | 0.4276           | H           | -5.0659          | -1.5823          | -3.0664          |
| H           | -6.3287          | 1.0766           | 0.442            | H           | -3.5781          | -0.7526          | -2.6328          |
| H           | -2.9039          | -2.4175          | 1.6801           | H           | -6.9207          | 0.4377           | 0.9395           |
| H           | 4.8654           | -3.7249          | 0.1827           | H           | 5.8478           | -2.1836          | 1.4778           |
| H           | -7.3072          | -2.5125          | -0.5904          | H           | -6.5731          | -3.1742          | -2.4177          |
| H           | -6.9611          | -3.384           | -2.0756          | H           | -6.77            | -4.6319          | -1.4578          |
| <b>5b-5</b> | <b>X axis(Å)</b> | <b>Y axis(Å)</b> | <b>Z axis(Å)</b> | <b>5b-6</b> | <b>X axis(Å)</b> | <b>Y axis(Å)</b> | <b>Z axis(Å)</b> |
| C           | -0.5119          | 5.5386           | -1.227           | C           | -1.9661          | 4.832            | -0.9368          |
| C           | -1.0258          | 5.0342           | 0.119            | C           | -1.8286          | 4.2643           | 0.4781           |
| C           | -0.5527          | 3.6074           | 0.4475           | C           | -1.0031          | 2.9695           | 0.514            |
| C           | 0.9917           | 3.4633           | 0.3178           | C           | 0.379            | 3.1661           | -0.1738          |
| C           | 1.4861           | 3.9231           | -1.1047          | C           | 0.2069           | 3.6444           | -1.6626          |
| C           | 1.0018           | 5.3738           | -1.3728          | C           | -0.625           | 4.957            | -1.6707          |
| C           | 1.5217           | 2.0448           | 0.6342           | C           | 1.2966           | 1.9281           | -0.104           |
| C           | 3.0607           | 1.9672           | 0.5438           | C           | 2.6768           | 2.1902           | -0.7441          |
| C           | 3.6168           | 2.5415           | -0.7722          | C           | 2.5471           | 2.7169           | -2.1805          |
| C           | 3.0384           | 3.9121           | -1.1212          | C           | 1.6111           | 3.9281           | -2.2667          |
| C           | 0.9927           | 3.0222           | -2.2685          | C           | -0.4938          | 2.6158           | -2.5902          |
| C           | -1.0392          | 3.247            | 1.8304           | C           | -0.8581          | 2.4752           | 1.9377           |
| O           | -0.629           | 3.7172           | 2.883            | O           | -0.2249          | 3.0143           | 2.8343           |
| O           | 1.6118           | 4.3607           | 1.2766           | O           | 1.0756           | 4.2301           | 0.5256           |
| C           | 3.5644           | 0.5569           | 0.7225           | C           | 3.5739           | 0.9774           | -0.699           |
| O           | 3.1874           | -0.3718          | -0.2482          | O           | 2.9964           | -0.2676          | -0.9518          |
| C           | 4.3785           | 0.1341           | 1.6873           | C           | 4.8705           | 1.0044           | -0.3966          |
| C           | 4.5766           | -1.5977          | -2.5547          | C           | 3.093            | -2.5466          | -2.8347          |
| C           | 5.1616           | -1.4049          | -1.1607          | C           | 4.2859           | -1.7268          | -2.358           |
| C           | 4.0644           | -1.5104          | -0.0901          | C           | 4.0688           | -1.2412          | -0.9202          |
| C           | 3.3363           | -2.8951          | -0.1531          | C           | 3.834            | -2.4408          | 0.0711           |
| C           | 2.7791           | -3.2045          | -1.5935          | C           | 2.6865           | -3.4044          | -0.4175          |
| C           | 3.8663           | -2.9406          | -2.6752          | C           | 2.851            | -3.7463          | -1.9267          |
| C           | 2.2169           | -3.0631          | 0.9015           | C           | 3.5773           | -1.9936          | 1.5351           |
| C           | 0.9029           | -2.3201          | 0.5995           | C           | 2.1763           | -1.4137          | 1.7995           |
| C           | 0.4127           | -2.5378          | -0.8407          | C           | 1.0828           | -2.3727          | 1.304            |
| C           | 1.516            | -2.3538          | -1.8849          | C           | 1.2951           | -2.7728          | -0.1596          |
| C           | -0.1669          | -2.7031          | 1.6085           | C           | 2.0345           | -0.9758          | 3.2477           |
| C           | -0.7205          | -1.649           | 2.4984           | C           | 2.6807           | 0.3203           | 3.6206           |
| C           | -0.6617          | -3.9415          | 1.7756           | C           | 1.3614           | -1.6082          | 4.2224           |
| C           | 2.3968           | -4.7058          | -1.748           | C           | 2.7374           | -4.7742          | 0.3229           |
| C           | 4.6586           | -1.2327          | 1.2739           | C           | 5.2457           | -0.3947          | -0.4864          |
| O           | 5.3028           | -2.0198          | 1.9536           | O           | 6.3686           | -0.8055          | -0.2264          |
| C           | -5.6986          | -3.2537          | -0.2713          | C           | -7.2066          | -2.5257          | -0.0924          |
| C           | -4.9018          | -2.1949          | 0.4506           | C           | -6.3666          | -1.3548          | 0.3639           |
| C           | -4.7683          | -0.9175          | 0.0167           | C           | -5.1827          | -1.0105          | -0.2012          |
| C           | -5.4703          | -0.4333          | -1.2669          | C           | -4.5882          | -1.8261          | -1.3707          |
| C           | -5.9869          | -1.6147          | -2.1349          | C           | -5.3032          | -3.1926          | -1.5607          |

|   |         |         |         |   |         |         |         |
|---|---------|---------|---------|---|---------|---------|---------|
| C | -3.9429 | 0.1523  | 0.7211  | C | -4.3243 | 0.1768  | 0.2207  |
| C | -2.9643 | 0.8864  | -0.2203 | C | -2.8651 | -0.2247 | 0.5025  |
| C | -3.7315 | 1.4754  | -1.4127 | C | -2.2568 | -0.9259 | -0.7178 |
| C | -4.4969 | 0.3825  | -2.1561 | C | -3.0902 | -2.1425 | -1.1109 |
| C | -2.1275 | 1.9468  | 0.4628  | C | -2.0462 | 0.9734  | 0.9074  |
| C | -2.0818 | 2.2386  | 1.7623  | C | -1.5574 | 1.2122  | 2.1217  |
| O | -1.2645 | 2.6564  | -0.3743 | O | -1.7728 | 1.9032  | -0.0877 |
| C | -6.6752 | 0.4519  | -0.8682 | C | -4.732  | -1.0094 | -2.6771 |
| C | -4.3005 | -2.6799 | 1.7291  | C | -6.9939 | -0.5978 | 1.4928  |
| O | -4.1654 | -3.8693 | 1.994   | O | -7.9879 | -1.0013 | 2.0873  |
| O | 4.3175  | -3.9238 | 0.1322  | O | 5.0409  | -3.2441 | 0.0958  |
| C | -6.6665 | -2.6929 | -1.3055 | C | -6.8145 | -3.0733 | -1.4583 |
| O | -0.4735 | -0.4573 | 2.3609  | O | 3.3159  | 0.9955  | 2.819   |
| H | -1.3977 | -2.0005 | 3.2954  | H | 2.554   | 0.6409  | 4.6685  |
| H | -1.0315 | 5.0172  | -2.0383 | H | -2.652  | 4.2034  | -1.5157 |
| H | -0.7701 | 6.5988  | -1.3362 | H | -2.4382 | 5.8203  | -0.8824 |
| H | -0.6964 | 5.7283  | 0.9033  | H | -1.37   | 5.0235  | 1.1244  |
| H | -2.1226 | 5.0787  | 0.1066  | H | -2.8353 | 4.0851  | 0.877   |
| H | 1.4947  | 6.0681  | -0.6799 | H | -0.0506 | 5.7672  | -1.2029 |
| H | 1.2996  | 5.6914  | -2.3803 | H | -0.812  | 5.2788  | -2.7031 |
| H | 1.2411  | 1.7659  | 1.6582  | H | 1.4699  | 1.6681  | 0.9458  |
| H | 1.0567  | 1.3031  | -0.0251 | H | 0.8095  | 1.0627  | -0.5672 |
| H | 3.4693  | 2.5798  | 1.3601  | H | 3.167   | 2.9782  | -0.1541 |
| H | 4.7091  | 2.6283  | -0.7007 | H | 3.5348  | 3.011   | -2.5584 |
| H | 3.4304  | 1.8517  | -1.6046 | H | 2.1938  | 1.9216  | -2.8482 |
| H | 3.4099  | 4.2147  | -2.1087 | H | 1.5189  | 4.2341  | -3.3167 |
| H | 3.4352  | 4.6527  | -0.415  | H | 2.0829  | 4.774   | -1.7503 |
| H | 1.2381  | 1.9672  | -2.1218 | H | -0.0409 | 1.6223  | -2.5366 |
| H | -0.0859 | 3.0779  | -2.4279 | H | -1.5577 | 2.4962  | -2.3765 |
| H | 1.4581  | 3.3299  | -3.213  | H | -0.4335 | 2.9405  | -3.6363 |
| H | 1.2164  | 4.1924  | 2.1584  | H | 1.1622  | 3.9769  | 1.4687  |
| H | 4.8053  | 0.6488  | 2.5261  | H | 5.5135  | 1.8234  | -0.138  |
| H | 3.8864  | -0.7808 | -2.7938 | H | 2.195   | -1.9205 | -2.8844 |
| H | 5.3831  | -1.5475 | -3.2957 | H | 3.2814  | -2.8986 | -3.8558 |
| H | 5.9502  | -2.146  | -0.98   | H | 5.203   | -2.3244 | -2.4315 |
| H | 5.6464  | -0.4208 | -1.1264 | H | 4.4121  | -0.8741 | -3.0376 |
| H | 4.6325  | -3.7261 | -2.6203 | H | 3.6996  | -4.4324 | -2.0542 |
| H | 3.4251  | -3.0202 | -3.6772 | H | 1.9677  | -4.2904 | -2.2854 |
| H | 2.0206  | -4.1374 | 1.0203  | H | 3.7429  | -2.8493 | 2.2049  |
| H | 2.5842  | -2.7619 | 1.8914  | H | 4.3518  | -1.2789 | 1.8395  |
| H | 1.1048  | -1.2497 | 0.7031  | H | 2.0519  | -0.5079 | 1.2053  |
| H | -0.4009 | -1.8333 | -1.0582 | H | 0.1009  | -1.8942 | 1.4042  |
| H | -0.0244 | -3.5364 | -0.9578 | H | 1.0441  | -3.2762 | 1.9221  |
| H | 1.108   | -2.6189 | -2.8693 | H | 0.5044  | -3.4786 | -0.4455 |
| H | 1.7617  | -1.29   | -1.9542 | H | 1.1439  | -1.8923 | -0.7918 |
| H | -1.4326 | -4.1794 | 2.5044  | H | 1.2996  | -1.2184 | 5.235   |
| H | -0.3164 | -4.7738 | 1.1684  | H | 0.8558  | -2.5528 | 4.0511  |



|             |                  |                  |                  |             |                  |                  |                  |
|-------------|------------------|------------------|------------------|-------------|------------------|------------------|------------------|
| H           | 1.6624           | -5.0347          | -1.008           | H           | 2.6973           | -4.6706          | 1.4103           |
| H           | 1.9677           | -4.8965          | -2.7389          | H           | 1.8943           | -5.4084          | 0.0238           |
| H           | 3.2706           | -5.3592          | -1.6469          | H           | 3.6526           | -5.329           | 0.0876           |
| H           | -4.9962          | -3.9373          | -0.7652          | H           | -7.1198          | -3.3244          | 0.6555           |
| H           | -6.2784          | -3.8512          | 0.4429           | H           | -8.2656          | -2.2429          | -0.1384          |
| H           | -5.1511          | -2.0792          | -2.6761          | H           | -4.9657          | -3.9063          | -0.7965          |
| H           | -6.6814          | -1.25            | -2.9021          | H           | -5.0344          | -3.6339          | -2.5287          |
| H           | -4.6321          | 0.87             | 1.1846           | H           | -4.3645          | 0.9338           | -0.5733          |
| H           | -3.3516          | -0.271           | 1.5355           | H           | -4.7075          | 0.673            | 1.1148           |
| H           | -2.2566          | 0.14             | -0.6104          | H           | -2.8657          | -0.9409          | 1.3373           |
| H           | -4.4164          | 2.264            | -1.0785          | H           | -2.1785          | -0.2389          | -1.5689          |
| H           | -3.0378          | 1.9485           | -2.119           | H           | -1.2352          | -1.249           | -0.4935          |
| H           | -5.0438          | 0.837            | -2.9923          | H           | -2.6445          | -2.6081          | -1.9994          |
| H           | -3.7568          | -0.2931          | -2.6074          | H           | -3.0038          | -2.8817          | -0.3024          |
| H           | -2.5946          | 1.8217           | 2.6068           | H           | -1.6246          | 0.65             | 3.0329           |
| H           | -7.2257          | 0.7877           | -1.7545          | H           | -4.3563          | -1.5759          | -3.5371          |
| H           | -7.38            | -0.0874          | -0.2258          | H           | -5.7772          | -0.7525          | -2.8811          |
| H           | -6.3712          | 1.3491           | -0.3196          | H           | -4.1754          | -0.0674          | -2.6469          |
| H           | -3.9845          | -1.9135          | 2.4492           | H           | -6.5283          | 0.3531           | 1.7794           |
| H           | 4.74             | -3.7163          | 0.9928           | H           | 5.8033           | -2.6571          | 0.2875           |
| H           | -7.5562          | -2.2904          | -0.808           | H           | -7.2038          | -2.4234          | -2.2503          |
| H           | -7.0144          | -3.5022          | -1.9579          | H           | -7.2781          | -4.0556          | -1.6059          |
| <b>5b-7</b> | <b>X axis(Å)</b> | <b>Y axis(Å)</b> | <b>Z axis(Å)</b> | <b>5b-8</b> | <b>X axis(Å)</b> | <b>Y axis(Å)</b> | <b>Z axis(Å)</b> |
| C           | -2.2048          | 4.8885           | -1.0261          | C           | -0.3451          | 5.6356           | -0.9607          |
| C           | -2.1877          | 4.3865           | 0.4169           | C           | -0.7078          | 5.018            | 0.3893           |
| C           | -1.3087          | 3.1386           | 0.6001           | C           | -0.2773          | 3.5469           | 0.5103           |
| C           | 0.1315           | 3.365            | 0.0522           | C           | 1.2276           | 3.3594           | 0.1625           |
| C           | 0.0895           | 3.7984           | -1.4625          | C           | 1.5495           | 3.9204           | -1.2728          |
| C           | -0.7992          | 5.0648           | -1.6064          | C           | 1.1214           | 5.4116           | -1.3408          |
| C           | 1.094            | 2.1643           | 0.2469           | C           | 1.721            | 1.9022           | 0.2918           |
| C           | 2.5161           | 2.4898           | -0.2634          | C           | 3.2271           | 1.7634           | -0.0189          |
| C           | 2.51             | 2.9982           | -1.715           | C           | 3.6116           | 2.3998           | -1.3644          |
| C           | 1.528            | 4.1504           | -1.927           | C           | 3.0807           | 3.827            | -1.5149          |
| C           | -0.4566          | 2.7069           | -2.422           | C           | 0.8465           | 3.1589           | -2.4288          |
| C           | -1.2969          | 2.7457           | 2.0594           | C           | -0.6101          | 3.0438           | 1.8958           |
| O           | -0.7749          | 3.3783           | 2.9675           | O           | -0.0649          | 3.3752           | 2.9389           |
| O           | 0.7185           | 4.4759           | 0.7825           | O           | 2.0073           | 4.146            | 1.0991           |
| C           | 3.4832           | 1.3371           | -0.1534          | C           | 3.6789           | 0.3245           | 0.0058           |
| O           | 3.0565           | 0.0816           | -0.5897          | O           | 2.9141           | -0.5929          | -0.7144          |
| C           | 4.7428           | 1.4444           | 0.2657           | C           | 4.7481           | -0.1381          | 0.65             |
| C           | 3.5198           | -1.5651          | -2.9942          | C           | 3.1046           | -2.2866          | -3.1171          |
| C           | 4.5806           | -0.7709          | -2.2409          | C           | 4.22             | -2.0485          | -2.1055          |
| C           | 4.2517           | -0.7241          | -0.7421          | C           | 3.6394           | -1.8444          | -0.7008          |
| C           | 4.1662           | -2.1659          | -0.1301          | C           | 2.7872           | -3.0808          | -0.2431          |
| C           | 3.1766           | -3.0984          | -0.9247          | C           | 1.6724           | -3.4556          | -1.2914          |
| C           | 3.4145           | -2.9878          | -2.4588          | C           | 2.2577           | -3.4944          | -2.7331          |
| C           | 3.8286           | -2.1831          | 1.3824           | C           | 2.1683           | -2.9172          | 1.1675           |

|   |         |         |         |   |         |         |         |
|---|---------|---------|---------|---|---------|---------|---------|
| C | 2.3564  | -1.8932 | 1.7341  | C | 0.9523  | -1.979  | 1.244   |
| C | 1.4184  | -2.8008 | 0.9228  | C | -0.1069 | -2.3389 | 0.1895  |
| C | 1.708   | -2.7478 | -0.5799 | C | 0.4902  | -2.4541 | -1.2167 |
| C | 2.0432  | -1.9944 | 3.2212  | C | 0.4346  | -1.9291 | 2.6721  |
| C | 0.8088  | -1.3072 | 3.7017  | C | 1.1023  | -0.9632 | 3.5952  |
| C | 2.7735  | -2.607  | 4.1681  | C | -0.5529 | -2.6734 | 3.1955  |
| C | 3.4047  | -4.6012 | -0.5821 | C | 1.108   | -4.8849 | -1.0367 |
| C | 5.2752  | 0.1229  | -0.0167 | C | 4.7538  | -1.5427 | 0.2778  |
| O | 6.4059  | -0.2219 | 0.2982  | O | 5.5633  | -2.349  | 0.7159  |
| C | -6.833  | -2.9936 | -0.5051 | C | -5.6795 | -3.0472 | -0.5496 |
| C | -6.2039 | -1.7057 | -0.025  | C | -4.7168 | -2.1581 | 0.2001  |
| C | -4.9761 | -1.2774 | -0.4105 | C | -4.6592 | -0.8112 | 0.0559  |
| C | -4.1037 | -2.1131 | -1.3741 | C | -5.6126 | -0.0702 | -0.9039 |
| C | -4.6383 | -3.5617 | -1.5468 | C | -6.3366 | -1.0394 | -1.8799 |
| C | -4.3254 | 0.0296  | 0.0313  | C | -3.6866 | 0.101   | 0.7936  |
| C | -2.9109 | -0.1835 | 0.5964  | C | -2.91   | 1.0389  | -0.1532 |
| C | -2.0269 | -0.9078 | -0.4258 | C | -3.893  | 1.8604  | -0.9989 |
| C | -2.6536 | -2.2383 | -0.8319 | C | -4.8323 | 0.9441  | -1.7804 |
| C | -2.2838 | 1.1215  | 1.0085  | C | -1.9201 | 1.9472  | 0.5424  |
| C | -1.9722 | 1.4749  | 2.2535  | C | -1.6884 | 2.0685  | 1.8481  |
| O | -1.9586 | 2.0056  | -0.0137 | O | -1.1335 | 2.7202  | -0.3105 |
| C | -4.0865 | -1.4261 | -2.7606 | C | -6.6793 | 0.6765  | -0.0681 |
| C | -7.0916 | -0.94   | 0.9063  | C | -3.8485 | -2.9098 | 1.156   |
| O | -8.1532 | -1.3889 | 1.3262  | O | -3.7212 | -4.1285 | 1.1259  |
| O | 5.4759  | -2.7783 | -0.2566 | O | 3.6714  | -4.2274 | -0.1689 |
| C | -6.1472 | -3.6037 | -1.7204 | C | -6.8409 | -2.294  | -1.1853 |
| O | 0.0488  | -0.7064 | 2.952   | O | 2.0263  | -0.2415 | 3.2401  |
| H | 0.6098  | -1.3703 | 4.785   | H | 0.7166  | -0.9354 | 4.6283  |
| H | -2.7863 | 4.1987  | -1.6475 | H | -1.003  | 5.23    | -1.7372 |
| H | -2.7332 | 5.8486  | -1.0666 | H | -0.5469 | 6.713   | -0.9286 |
| H | -1.836  | 5.1955  | 1.07    | H | -0.241  | 5.612   | 1.1857  |
| H | -3.2209 | 4.1717  | 0.7188  | H | -1.7926 | 5.1104  | 0.5293  |
| H | -0.3222 | 5.916   | -1.103  | H | 1.749   | 6.0131  | -0.6702 |
| H | -0.883  | 5.3489  | -2.6632 | H | 1.2929  | 5.8083  | -2.3496 |
| H | 1.1766  | 1.9219  | 1.3143  | H | 1.5661  | 1.5537  | 1.3197  |
| H | 0.6995  | 1.2686  | -0.2456 | H | 1.1286  | 1.2421  | -0.3515 |
| H | 2.9081  | 3.3046  | 0.3624  | H | 3.7765  | 2.3035  | 0.7653  |
| H | 3.5151  | 3.3433  | -1.9912 | H | 4.705   | 2.4207  | -1.4623 |
| H | 2.2756  | 2.1785  | -2.4056 | H | 3.2509  | 1.7832  | -2.1971 |
| H | 1.528   | 4.4289  | -2.9887 | H | 3.3303  | 4.1965  | -2.5178 |
| H | 1.8984  | 5.0322  | -1.3884 | H | 3.6189  | 4.4792  | -0.815  |
| H | 0.0529  | 1.747   | -2.3038 | H | 1.0213  | 2.0804  | -2.3934 |
| H | -1.5249 | 2.5192  | -2.2987 | H | -0.2351 | 3.3058  | -2.4472 |
| H | -0.323  | 3.0142  | -3.4665 | H | 1.2167  | 3.5117  | -3.3992 |
| H | 0.6178  | 4.3015  | 1.7424  | H | 1.7704  | 3.869   | 2.0094  |
| H | 5.2954  | 2.2905  | 0.6264  | H | 5.4675  | 0.3627  | 1.2684  |
| H | 2.5482  | -1.0624 | -2.9287 | H | 2.4738  | -1.3947 | -3.2056 |

|             |                  |                  |                  |             |                  |                  |                  |
|-------------|------------------|------------------|------------------|-------------|------------------|------------------|------------------|
| H           | 3.7805           | -1.5979          | -4.0585          | H           | 3.5443           | -2.4537          | -4.1074          |
| H           | 5.5705           | -1.2133          | -2.408           | H           | 4.9223           | -2.8912          | -2.1169          |
| H           | 4.6163           | 0.2414           | -2.6636          | H           | 4.7879           | -1.1638          | -2.4212          |
| H           | 4.3472           | -3.5064          | -2.7202          | H           | 2.8881           | -4.3871          | -2.8456          |
| H           | 2.6169           | -3.513           | -3.0001          | H           | 1.4459           | -3.6056          | -3.4636          |
| H           | 4.1148           | -3.1678          | 1.7748           | H           | 1.8821           | -3.9092          | 1.5453           |
| H           | 4.4804           | -1.484           | 1.9218           | H           | 2.9413           | -2.5895          | 1.8744           |
| H           | 2.1548           | -0.8549          | 1.4494           | H           | 1.2714           | -0.9639          | 0.9951           |
| H           | 0.3743           | -2.5121          | 1.0842           | H           | -0.8889          | -1.5699          | 0.1795           |
| H           | 1.4912           | -3.8347          | 1.2816           | H           | -0.6106          | -3.2786          | 0.4388           |
| H           | 1.0281           | -3.4432          | -1.0893          | H           | -0.3056          | -2.7641          | -1.9067          |
| H           | 1.4436           | -1.7541          | -0.9554          | H           | 0.7944           | -1.4586          | -1.5543          |
| H           | 2.4823           | -2.6192          | 5.215            | H           | -0.861           | -2.5901          | 4.234            |
| H           | 3.6958           | -3.1306          | 3.9383           | H           | -1.0695          | -3.4298          | 2.6115           |
| H           | 3.3238           | -4.8106          | 0.4876           | H           | 0.7144           | -5.0116          | -0.0248          |
| H           | 2.6681           | -5.2317          | -1.0944          | H           | 0.2926           | -5.11            | -1.7345          |
| H           | 4.3952           | -4.9445          | -0.9015          | H           | 1.8737           | -5.6553          | -1.1817          |
| H           | -6.8122          | -3.7159          | 0.3212           | H           | -5.1213          | -3.5794          | -1.3306          |
| H           | -7.8868          | -2.8325          | -0.7639          | H           | -6.0995          | -3.8082          | 0.1196           |
| H           | -4.3797          | -4.1683          | -0.668           | H           | -5.653           | -1.3476          | -2.6831          |
| H           | -4.1563          | -4.0478          | -2.4044          | H           | -7.1748          | -0.5305          | -2.3725          |
| H           | -4.9089          | 0.5536           | 0.7908           | H           | -4.2536          | 0.687            | 1.5283           |
| H           | -4.2932          | 0.7088           | -0.8306          | H           | -2.9491          | -0.4656          | 1.3657           |
| H           | -2.9943          | -0.8251          | 1.4858           | H           | -2.323           | 0.4056           | -0.8349          |
| H           | -1.8636          | -0.2879          | -1.3156          | H           | -4.4682          | 2.545            | -0.3637          |
| H           | -1.0354          | -1.0896          | 0.002            | H           | -3.3491          | 2.489            | -1.7154          |
| H           | -2.012           | -2.7212          | -1.5802          | H           | -5.5345          | 1.5612           | -2.3558          |
| H           | -2.6438          | -2.8952          | 0.049            | H           | -4.2268          | 0.4015           | -2.5197          |
| H           | -2.0864          | 0.9486           | 3.1814           | H           | -2.1271          | 1.5874           | 2.7004           |
| H           | -3.5095          | -2.0151          | -3.4829          | H           | -7.4025          | 1.1833           | -0.7174          |
| H           | -5.0974          | -1.3045          | -3.165           | H           | -7.2388          | -0.0076          | 0.5794           |
| H           | -3.637           | -0.4287          | -2.7297          | H           | -6.2418          | 1.4407           | 0.5821           |
| H           | -6.7585          | 0.0599           | 1.2096           | H           | -3.3226          | -2.3189          | 1.9158           |
| H           | 6.1395           | -2.1816          | 0.151            | H           | 4.4328           | -3.9957          | 0.4044           |
| H           | -6.4451          | -3.0681          | -2.6289          | H           | -7.5854          | -2.0379          | -0.4229          |
| H           | -6.4805          | -4.6403          | -1.847           | H           | -7.3468          | -2.944           | -1.9086          |
| <b>5c-1</b> | <b>X axis(Å)</b> | <b>Y axis(Å)</b> | <b>Z axis(Å)</b> | <b>5c-2</b> | <b>X axis(Å)</b> | <b>Y axis(Å)</b> | <b>Z axis(Å)</b> |
| C           | 3.6721           | -4.0411          | 1.8877           | C           | 2.8629           | 4.5897           | -2.0992          |
| C           | 3.9862           | -3.7364          | 0.4224           | C           | 3.3873           | 4.3448           | -0.6846          |
| C           | 2.9621           | -2.7907          | -0.2216          | C           | 2.6478           | 3.211            | 0.0411           |
| C           | 1.5049           | -3.3053          | -0.0259          | C           | 1.1033           | 3.4141           | 0.0073           |
| C           | 1.1809           | -3.509           | 1.501            | C           | 0.5859           | 3.5649           | -1.4712          |
| C           | 2.2229           | -4.4876          | 2.1084           | C           | 1.3394           | 4.7398           | -2.1515          |
| C           | 0.4335           | -2.4116          | -0.6876          | C           | 0.3133           | 2.307            | 0.7393           |
| C           | -0.9973          | -2.967           | -0.5013          | C           | -1.2125          | 2.5497           | 0.714            |
| C           | -1.3168          | -3.2785          | 0.9673           | C           | -1.7443          | 2.8256           | -0.6999          |
| C           | -0.2353          | -4.133           | 1.6341           | C           | -0.9324          | 3.8927           | -1.4383          |

|   |         |         |         |   |         |         |         |
|---|---------|---------|---------|---|---------|---------|---------|
| C | 1.1929  | -2.2015 | 2.3391  | C | 0.7723  | 2.295   | -2.3457 |
| C | 3.2923  | -2.5959 | -1.6833 | C | 3.1662  | 3.0969  | 1.4564  |
| O | 3.2204  | -3.4481 | -2.5576 | O | 3.0077  | 3.9173  | 2.3497  |
| O | 1.3956  | -4.6086 | -0.6531 | O | 0.793   | 4.6582  | 0.6848  |
| C | -2.0318 | -2.0425 | -1.0978 | C | -1.9277 | 1.3861  | 1.3565  |
| O | -1.8021 | -0.6696 | -0.9931 | O | -1.779  | 0.1391  | 0.7474  |
| C | -3.1396 | -2.4314 | -1.7264 | C | -2.6759 | 1.4463  | 2.456   |
| C | -1.1546 | 1.5943  | -2.8002 | C | -0.5092 | -2.468  | 1.2687  |
| C | -2.1411 | 0.4702  | -3.0873 | C | -1.2441 | -1.6155 | 2.2958  |
| C | -2.8135 | -0.0137 | -1.794  | C | -2.3857 | -0.8342 | 1.6308  |
| C | -3.557  | 1.1542  | -1.054  | C | -3.4107 | -1.7979 | 0.9323  |
| C | -2.6176 | 2.3962  | -0.8142 | C | -2.7059 | -2.784  | -0.074  |
| C | -1.8419 | 2.7657  | -2.1109 | C | -1.4541 | -3.4412 | 0.5763  |
| C | -4.2229 | 0.7196  | 0.2764  | C | -4.58   | -1.0606 | 0.2327  |
| C | -3.2526 | 0.4927  | 1.4516  | C | -4.2126 | -0.363  | -1.0891 |
| C | -2.3189 | 1.7011  | 1.6402  | C | -3.4886 | -1.3292 | -2.0431 |
| C | -1.6236 | 2.1148  | 0.3408  | C | -2.3083 | -2.0415 | -1.3756 |
| C | -4.0167 | 0.0821  | 2.7012  | C | -5.4326 | 0.324   | -1.6827 |
| C | -4.5474 | -1.3141 | 2.736   | C | -5.8644 | 1.5998  | -1.0353 |
| C | -4.2388 | 0.8247  | 3.7981  | C | -6.1493 | -0.0716 | -2.7474 |
| C | -3.4364 | 3.6693  | -0.4477 | C | -3.6387 | -3.9697 | -0.4603 |
| C | -3.7373 | -1.1666 | -2.121  | C | -3.0544 | 0.0569  | 2.6552  |
| O | -4.834  | -1.0793 | -2.6562 | O | -3.8051 | -0.3133 | 3.5477  |
| C | 2.0341  | 4.8456  | 1.9942  | C | 2.783   | -4.5962 | -1.7945 |
| C | 1.9786  | 3.3793  | 1.63    | C | 2.4989  | -3.1563 | -1.4317 |
| C | 2.4393  | 2.8777  | 0.4571  | C | 3.1206  | -2.4981 | -0.4215 |
| C | 3.1188  | 3.7834  | -0.5902 | C | 4.2075  | -3.1833 | 0.4318  |
| C | 3.4852  | 5.1773  | -0.0104 | C | 4.7147  | -4.5016 | -0.2143 |
| C | 2.3354  | 1.4212  | 0.0275  | C | 2.8246  | -1.0657 | -0.0014 |
| C | 3.6898  | 0.8244  | -0.4046 | C | 4.0864  | -0.1868 | 0.1025  |
| C | 4.3099  | 1.6808  | -1.5182 | C | 5.1088  | -0.8364 | 1.0444  |
| C | 4.445   | 3.1382  | -1.0766 | C | 5.4435  | -2.2552 | 0.5841  |
| C | 3.5133  | -0.6334 | -0.7649 | C | 3.6815  | 1.2165  | 0.4901  |
| C | 3.6626  | -1.2151 | -1.9534 | C | 3.8469  | 1.8281  | 1.6613  |
| O | 3.1403  | -1.4542 | 0.2976  | O | 3.036   | 1.935   | -0.5149 |
| C | 2.1616  | 3.9856  | -1.7886 | C | 3.6225  | -3.5107 | 1.8266  |
| C | 1.3431  | 2.5406  | 2.6963  | C | 1.4388  | -2.5411 | -2.2936 |
| O | 0.8819  | 3.0179  | 3.7281  | O | 0.9111  | -3.1414 | -3.2243 |
| O | -4.6247 | 1.6195  | -1.9161 | O | -4.0083 | -2.629  | 1.9589  |
| C | 2.3606  | 5.7662  | 0.8252  | C | 3.5768  | -5.3597 | -0.7423 |
| O | -4.3904 | -2.1065 | 1.8147  | O | -5.2874 | 2.0813  | -0.0672 |
| H | -5.0959 | -1.6003 | 3.6494  | H | -6.7442 | 2.0941  | -1.4808 |
| H | 4.3479  | -4.8282 | 2.2434  | H | 3.3267  | 5.4982  | -2.5017 |
| H | 3.8915  | -3.1588 | 2.4991  | H | 3.1847  | 3.7732  | -2.755  |
| H | 4.9922  | -3.301  | 0.3684  | H | 4.4596  | 4.1195  | -0.7483 |
| H | 4.027   | -4.6817 | -0.1339 | H | 3.2996  | 5.2767  | -0.1111 |
| H | 2.0465  | -4.6061 | 3.1852  | H | 1.0262  | 4.8329  | -3.1993 |

|   |         |         |         |   |         |         |         |
|---|---------|---------|---------|---|---------|---------|---------|
| H | 2.0982  | -5.4868 | 1.6713  | H | 1.0676  | 5.6885  | -1.6706 |
| H | 0.5045  | -1.39   | -0.2979 | H | 0.5513  | 1.3247  | 0.3157  |
| H | 0.6186  | -2.3459 | -1.7679 | H | 0.6198  | 2.27    | 1.7931  |
| H | -1.0511 | -3.9172 | -1.0522 | H | -1.414  | 3.4476  | 1.3153  |
| H | -1.4525 | -2.3514 | 1.5348  | H | -1.753  | 1.9056  | -1.2952 |
| H | -2.2724 | -3.8144 | 1.0309  | H | -2.7885 | 3.1563  | -0.6414 |
| H | -0.2542 | -5.1365 | 1.19    | H | -1.1047 | 4.8642  | -0.9577 |
| H | -0.492  | -4.2707 | 2.6923  | H | -1.3213 | 3.9924  | -2.4599 |
| H | 0.5623  | -1.4178 | 1.9109  | H | 0.3525  | 1.397   | -1.8848 |
| H | 0.8204  | -2.3942 | 3.3528  | H | 0.2726  | 2.4216  | -3.3139 |
| H | 2.1908  | -1.7763 | 2.4617  | H | 1.8177  | 2.0765  | -2.5716 |
| H | 1.7289  | -4.5451 | -1.5726 | H | 1.2328  | 4.6609  | 1.5607  |
| H | -3.5346 | -3.4111 | -1.9132 | H | -2.9453 | 2.2771  | 3.0789  |
| H | -0.7117 | 1.938   | -3.7423 | H | 0.2895  | -3.0293 | 1.767   |
| H | -0.3267 | 1.2234  | -2.1873 | H | -0.0238 | -1.8267 | 0.5263  |
| H | -2.8938 | 0.8107  | -3.8094 | H | -1.6267 | -2.25   | 3.1049  |
| H | -1.5945 | -0.3504 | -3.5697 | H | -0.5201 | -0.9283 | 2.7525  |
| H | -2.5355 | 3.215   | -2.8349 | H | -1.7762 | -4.1781 | 1.3248  |
| H | -1.0944 | 3.5382  | -1.892  | H | -0.8918 | -4.0051 | -0.1793 |
| H | -4.9668 | 1.475   | 0.5669  | H | -5.3939 | -1.7757 | 0.0471  |
| H | -4.8283 | -0.1779 | 0.1     | H | -5.0276 | -0.3446 | 0.9329  |
| H | -2.598  | -0.3496 | 1.2146  | H | -3.4974 | 0.435   | -0.8796 |
| H | -1.5541 | 1.459   | 2.3888  | H | -3.1185 | -0.7757 | -2.9156 |
| H | -2.8692 | 2.5623  | 2.0347  | H | -4.1805 | -2.084  | -2.4326 |
| H | -1.0227 | 3.0118  | 0.5386  | H | -1.8823 | -2.7535 | -2.0944 |
| H | -0.9046 | 1.3381  | 0.064   | H | -1.516  | -1.3105 | -1.1879 |
| H | -4.7847 | 0.4477  | 4.6585  | H | -7.0046 | 0.4877  | -3.1161 |
| H | -3.8845 | 1.847   | 3.8827  | H | -5.9136 | -0.9792 | -3.2935 |
| H | -4.0771 | 3.525   | 0.4261  | H | -4.5895 | -3.6406 | -0.8871 |
| H | -2.7679 | 4.5099  | -0.2264 | H | -3.1556 | -4.6173 | -1.2018 |
| H | -4.0848 | 3.9856  | -1.2724 | H | -3.8759 | -4.5978 | 0.4058  |
| H | 1.0763  | 5.1726  | 2.417   | H | 1.846   | -5.1409 | -1.9641 |
| H | 2.7923  | 4.9764  | 2.7771  | H | 3.3374  | -4.6085 | -2.7418 |
| H | 4.3786  | 5.1013  | 0.6247  | H | 5.3903  | -4.2777 | -1.0514 |
| H | 3.7448  | 5.8721  | -0.819  | H | 5.3053  | -5.0791 | 0.508   |
| H | 1.9096  | 0.7892  | 0.8079  | H | 2.3138  | -1.0898 | 0.9703  |
| H | 1.6231  | 1.3559  | -0.8044 | H | 2.1251  | -0.5737 | -0.6792 |
| H | 4.3722  | 0.859   | 0.4572  | H | 4.5498  | -0.1258 | -0.8929 |
| H | 5.3047  | 1.2961  | -1.776  | H | 6.0306  | -0.2414 | 1.0624  |
| H | 3.7077  | 1.6278  | -2.433  | H | 4.7343  | -0.8627 | 2.0743  |
| H | 5.1892  | 3.1739  | -0.2689 | H | 5.9677  | -2.1795 | -0.3787 |
| H | 4.8648  | 3.7234  | -1.905  | H | 6.1599  | -2.6977 | 1.2882  |
| H | 3.9313  | -0.8167 | -2.9128 | H | 4.2896  | 1.4976  | 2.581   |
| H | 2.603   | 4.6577  | -2.5335 | H | 2.7362  | -4.1505 | 1.7547  |
| H | 1.9268  | 3.049   | -2.3034 | H | 4.359   | -4.0339 | 2.4473  |
| H | 1.2077  | 4.4218  | -1.4741 | H | 3.3193  | -2.6143 | 2.3764  |
| H | 1.3012  | 1.458   | 2.5275  | H | 1.1363  | -1.5126 | -2.0637 |

|             |                  |                  |                  |             |                  |                  |                  |
|-------------|------------------|------------------|------------------|-------------|------------------|------------------|------------------|
| H           | -5.184           | 0.8504           | -2.1577          | H           | -4.3887          | -2.0431          | 2.6475           |
| H           | 1.4669           | 5.9244           | 0.211            | H           | 2.9158           | -5.668           | 0.0757           |
| H           | 2.6538           | 6.7514           | 1.2061           | H           | 3.9761           | -6.281           | -1.1822          |
| <b>5c-3</b> | <b>X axis(Å)</b> | <b>Y axis(Å)</b> | <b>Z axis(Å)</b> | <b>5c-4</b> | <b>X axis(Å)</b> | <b>Y axis(Å)</b> | <b>Z axis(Å)</b> |
| C           | -3.0944          | 4.7622           | 1.2093           | C           | 5.22             | -1.7698          | 1.7013           |
| C           | -2.9949          | 4.4616           | -0.2871          | C           | 5.2636           | -1.4369          | 0.2092           |
| C           | -2.0188          | 3.3172           | -0.6033          | C           | 3.8763           | -1.1309          | -0.3732          |
| C           | -0.6233          | 3.5672           | 0.0403           | C           | 2.8577           | -2.265           | -0.0517          |
| C           | -0.7531          | 3.7564           | 1.5971           | C           | 2.7586           | -2.507           | 1.5              |
| C           | -1.727           | 4.9326           | 1.8811           | C           | 4.1746           | -2.8359          | 2.0473           |
| C           | 0.4327           | 2.487            | -0.2934          | C           | 1.4531           | -2.0341          | -0.6524          |
| C           | 1.8129           | 2.8169           | 0.324            | C           | 0.4863           | -3.1994          | -0.3452          |
| C           | 1.7064           | 3.0518           | 1.839            | C           | 0.4289           | -3.5272          | 1.1531           |
| C           | 0.6431           | 4.1005           | 2.1842           | C           | 1.8211           | -3.7178          | 1.7622           |
| C           | -1.2737          | 2.5031           | 2.3461           | C           | 2.1952           | -1.3016          | 2.2993           |
| C           | -1.9174          | 3.1324           | -2.099           | C           | 3.984            | -0.8901          | -1.8607          |
| O           | -1.4036          | 3.9133           | -2.8882          | O           | 4.2877           | -1.7222          | -2.7045          |
| O           | -0.1018          | 4.8166           | -0.4872          | O           | 3.3514           | -3.4989          | -0.6362          |
| C           | 2.8767           | 1.7948           | -0.0094          | C           | -0.898           | -2.9476          | -0.8938          |
| O           | 2.4733           | 0.5987           | -0.6049          | O           | -1.3461          | -1.6265          | -0.9419          |
| C           | 4.1825           | 1.9611           | 0.1964           | C           | -1.7234          | -3.8905          | -1.344           |
| C           | 2.7209           | -0.6926          | -3.2793          | C           | -2.0107          | 0.3913           | -3.0471          |
| C           | 3.807            | 0.0843           | -2.5471          | C           | -2.335           | -1.096           | -3.078           |
| C           | 3.6764           | -0.0876          | -1.0268          | C           | -2.5999          | -1.6343          | -1.6645          |
| C           | 3.7387           | -1.5971          | -0.6033          | C           | -3.7564          | -0.8545          | -0.9442          |
| C           | 2.7075           | -2.4806          | -1.402           | C           | -3.5401          | 0.707            | -0.9807          |
| C           | 2.7729           | -2.1736          | -2.9256          | C           | -3.1445          | 1.1817           | -2.4077          |
| C           | 3.5714           | -1.8279          | 0.9222           | C           | -4.0112          | -1.3249          | 0.5137           |
| C           | 2.1345           | -1.6662          | 1.4578           | C           | -2.9701          | -0.8523          | 1.5513           |
| C           | 1.1329           | -2.4838          | 0.6277           | C           | -2.7505          | 0.6653           | 1.4621           |
| C           | 1.2715           | -2.2473          | -0.8759          | C           | -2.4551          | 1.1312           | 0.0373           |
| C           | 1.9662           | -1.9969          | 2.9339           | C           | -3.2741          | -1.2509          | 2.9879           |
| C           | 0.8119           | -1.3589          | 3.6348           | C           | -2.1218          | -1.2657          | 3.9404           |
| C           | 2.7513           | -2.7848          | 3.6864           | C           | -4.4623          | -1.6187          | 3.4949           |
| C           | 3.0286           | -3.9986          | -1.2717          | C           | -4.85            | 1.476            | -0.6376          |
| C           | 4.7449           | 0.7357           | -0.3432          | C           | -2.8836          | -3.1183          | -1.7532          |
| O           | 5.9273           | 0.4403           | -0.2375          | O           | -3.9349          | -3.6327          | -2.1089          |
| C           | -3.5338          | -4.3229          | 1.4684           | C           | -0.4695          | 5.2418           | 1.7822           |
| C           | -3.0472          | -2.9141          | 1.2134           | C           | 0.1781           | 3.9099           | 1.4749           |
| C           | -3.0291          | -2.3344          | -0.0129          | C           | 0.7034           | 3.5926           | 0.265            |
| C           | -3.5795          | -3.0687          | -1.252           | C           | 0.7165           | 4.6101           | -0.894           |
| C           | -4.4124          | -4.3226          | -0.8684          | C           | 0.3785           | 6.0502           | -0.4195          |
| C           | -2.461           | -0.9542          | -0.3212          | C           | 1.3138           | 2.2455           | -0.0973          |
| C           | -3.4465          | -0.0542          | -1.0932          | C           | 2.7277           | 2.3632           | -0.7047          |
| C           | -3.9252          | -0.7628          | -2.3696          | C           | 2.7066           | 3.3104           | -1.9134          |
| C           | -4.5254          | -2.1309          | -2.0487          | C           | 2.1289           | 4.6729           | -1.5344          |
| C           | -2.8258          | 1.3032           | -1.3412          | C           | 3.2718           | 0.9854           | -1.0124          |

|   |         |         |         |   |         |         |         |
|---|---------|---------|---------|---|---------|---------|---------|
| C | -2.4819 | 1.8544  | -2.5038 | C | 3.6096  | 0.4752  | -2.1953 |
| O | -2.5987 | 2.0595  | -0.1936 | O | 3.4243  | 0.1573  | 0.0975  |
| C | -2.402  | -3.5168 | -2.1497 | C | -0.3259 | 4.1864  | -1.9559 |
| C | -2.5754 | -2.2314 | 2.4624  | C | 0.1576  | 2.9779  | 2.6497  |
| O | -2.47   | -2.822  | 3.5338  | O | -0.2816 | 3.3154  | 3.7449  |
| O | 5.0513  | -2.1049 | -0.9513 | O | -4.9833 | -1.1002 | -1.6764 |
| C | -3.7347 | -5.1541 | 0.2078  | C | -0.791  | 6.0765  | 0.5497  |
| O | 0.0757  | -0.5504 | 3.0814  | O | -0.9731 | -1.0139 | 3.5964  |
| H | 0.6597  | -1.6499 | 4.6879  | H | -2.3617 | -1.5262 | 4.9852  |
| H | -3.6808 | 5.6776  | 1.3532  | H | 6.2089  | -2.1209 | 2.0197  |
| H | -3.6597 | 3.9646  | 1.7039  | H | 5.0284  | -0.8554 | 2.2735  |
| H | -3.9992 | 4.2182  | -0.6571 | H | 5.9333  | -0.5792 | 0.0663  |
| H | -2.6856 | 5.3754  | -0.8108 | H | 5.7194  | -2.2792 | -0.327  |
| H | -1.8733 | 5.0486  | 2.9627  | H | 4.1386  | -2.9592 | 3.1373  |
| H | -1.2865 | 5.8763  | 1.5343  | H | 4.5169  | -3.799  | 1.6467  |
| H | 0.0917  | 1.4985  | 0.035   | H | 1.0398  | -1.0851 | -0.293  |
| H | 0.5666  | 2.4274  | -1.3815 | H | 1.5242  | -1.9498 | -1.7447 |
| H | 2.1514  | 3.76    | -0.1294 | H | 0.8785  | -4.0904 | -0.8568 |
| H | 1.4881  | 2.1083  | 2.354   | H | -0.1066 | -2.74   | 1.6934  |
| H | 2.6694  | 3.3975  | 2.2358  | H | -0.1502 | -4.4462 | 1.3107  |
| H | 0.9801  | 5.0772  | 1.8135  | H | 2.2617  | -4.6362 | 1.3535  |
| H | 0.5826  | 4.2011  | 3.2754  | H | 1.7174  | -3.8915 | 2.841   |
| H | -0.7282 | 1.6015  | 2.0655  | H | 1.2507  | -0.9313 | 1.8929  |
| H | -1.1646 | 2.6267  | 3.4303  | H | 2.008   | -1.5873 | 3.3417  |
| H | -2.3324 | 2.3013  | 2.1721  | H | 2.8791  | -0.4517 | 2.3398  |
| H | -0.1421 | 4.7813  | -1.466  | H | 3.5778  | -3.3331 | -1.5752 |
| H | 4.7281  | 2.7765  | 0.6309  | H | -1.6118 | -4.9563 | -1.3972 |
| H | 2.858   | -0.5744 | -4.3606 | H | -1.8538 | 0.749   | -4.0715 |
| H | 1.7335  | -0.2787 | -3.0461 | H | -1.071  | 0.5659  | -2.5116 |
| H | 4.7957  | -0.2475 | -2.8886 | H | -3.2035 | -1.2726 | -3.7251 |
| H | 3.7194  | 1.1421  | -2.8266 | H | -1.4893 | -1.6214 | -3.5402 |
| H | 3.7045  | -2.5823 | -3.3403 | H | -4.017  | 1.1096  | -3.0715 |
| H | 1.9578  | -2.6915 | -3.4476 | H | -2.8699 | 2.2438  | -2.3871 |
| H | 3.9432  | -2.835  | 1.15    | H | -5.0102 | -0.9776 | 0.8075  |
| H | 4.2469  | -1.1648 | 1.4781  | H | -4.0899 | -2.4194 | 0.5441  |
| H | 1.8763  | -0.6082 | 1.3504  | H | -2.0259 | -1.3416 | 1.2985  |
| H | 0.1084  | -2.2285 | 0.9212  | H | -1.9095 | 0.9627  | 2.0989  |
| H | 1.2446  | -3.5531 | 0.846   | H | -3.6235 | 1.1987  | 1.8574  |
| H | 0.5724  | -2.913  | -1.3975 | H | -2.3545 | 2.2241  | 0.0425  |
| H | 0.9304  | -1.2328 | -1.1031 | H | -1.4741 | 0.7466  | -0.2556 |
| H | 2.5586  | -2.9616 | 4.7413  | H | -4.5901 | -1.899  | 4.537   |
| H | 3.616   | -3.2968 | 3.2776  | H | -5.3629 | -1.6475 | 2.8906  |
| H | 3.0557  | -4.3392 | -0.2334 | H | -5.2676 | 1.1911  | 0.3316  |
| H | 2.2734  | -4.6006 | -1.7911 | H | -4.6687 | 2.5571  | -0.6088 |
| H | 3.9978  | -4.2477 | -1.7182 | H | -5.63   | 1.3033  | -1.3876 |
| H | -2.8288 | -4.8626 | 2.1124  | H | -1.4051 | 5.0944  | 2.3356  |
| H | -4.485  | -4.2633 | 2.0132  | H | 0.2049  | 5.8098  | 2.436   |

|             |                  |                  |                  |             |                  |                  |                  |
|-------------|------------------|------------------|------------------|-------------|------------------|------------------|------------------|
| H           | -5.4016          | -4.022           | -0.4962          | H           | 1.2474           | 6.4983           | 0.0821           |
| H           | -4.5963          | -4.9455          | -1.7528          | H           | 0.158            | 6.6951           | -1.2795          |
| H           | -2.1363          | -0.4293          | 0.5791           | H           | 1.362            | 1.5744           | 0.7616           |
| H           | -1.5472          | -1.0835          | -0.9145          | H           | 0.6497           | 1.7447           | -0.8132          |
| H           | -4.3294          | 0.1103           | -0.4584          | H           | 3.3905           | 2.8065           | 0.0525           |
| H           | -4.6866          | -0.1527          | -2.8721          | H           | 3.7258           | 3.4537           | -2.2941          |
| H           | -3.101           | -0.8821          | -3.0828          | H           | 2.1236           | 2.8799           | -2.7364          |
| H           | -5.4483          | -1.965           | -1.4757          | H           | 2.8296           | 5.1495           | -0.8348          |
| H           | -4.8301          | -2.6141          | -2.986           | H           | 2.1075           | 5.3108           | -2.4275          |
| H           | -2.5459          | 1.491            | -3.5112          | H           | 3.5833           | 0.891            | -3.184           |
| H           | -2.7634          | -4.0808          | -3.0173          | H           | -0.3615          | 4.9081           | -2.7801          |
| H           | -1.8226          | -2.6731          | -2.5369          | H           | -0.1057          | 3.2092           | -2.3965          |
| H           | -1.7004          | -4.159           | -1.6064          | H           | -1.3327          | 4.1217           | -1.5299          |
| H           | -2.3385          | -1.1629          | 2.3896           | H           | 0.5549           | 1.9661           | 2.5003           |
| H           | 5.729            | -1.5174          | -0.5541          | H           | -5.1045          | -2.0689          | -1.7712          |
| H           | -2.7706          | -5.5336          | -0.1492          | H           | -1.7001          | 5.6999           | 0.0671           |
| H           | -4.3462          | -6.0331          | 0.4424           | H           | -1.0039          | 7.1086           | 0.8516           |
| <b>5c-5</b> | <b>X axis(Å)</b> | <b>Y axis(Å)</b> | <b>Z axis(Å)</b> | <b>5c-6</b> | <b>X axis(Å)</b> | <b>Y axis(Å)</b> | <b>Z axis(Å)</b> |
| C           | 2.3119           | 4.3822           | -1.8708          | C           | 0.7583           | 5.6821           | 0.0382           |
| C           | 2.6198           | 4.3028           | -0.3758          | C           | 0.9023           | 4.7657           | 1.2524           |
| C           | 1.8558           | 3.1745           | 0.3338           | C           | 0.3852           | 3.3406           | 0.9941           |
| C           | 0.3269           | 3.2445           | 0.046            | C           | -1.062           | 3.348            | 0.4215           |
| C           | 0.0404           | 3.2276           | -1.5009          | C           | -1.1595          | 4.2301           | -0.8747          |
| C           | 0.8094           | 4.3998           | -2.1687          | C           | -0.6541          | 5.6626           | -0.5526          |
| C           | -0.4883          | 2.1405           | 0.7525           | C           | -1.6305          | 1.9385           | 0.1523           |
| C           | -2.0042          | 2.2541           | 0.4769           | C           | -3.0964          | 1.9709           | -0.3413          |
| C           | -2.3269          | 2.3671           | -1.0206          | C           | -3.2717          | 2.9281           | -1.5376          |
| C           | -1.4833          | 3.4305           | -1.7285          | C           | -2.648           | 4.3079           | -1.3084          |
| C           | 0.4499           | 1.909            | -2.2117          | C           | -0.3441          | 3.6886           | -2.0785          |
| C           | 2.1477           | 3.2244           | 1.8175           | C           | 0.4774           | 2.5431           | 2.2744           |
| O           | 1.7804           | 4.0943           | 2.5948           | O           | -0.2237          | 2.6822           | 3.267            |
| O           | -0.1723          | 4.5109           | 0.5464           | O           | -1.9308          | 3.9673           | 1.4061           |
| C           | -2.7217          | 1.0893           | 1.1128           | C           | -3.6276          | 0.5727           | -0.6039          |
| O           | -2.4167          | -0.18            | 0.6207           | O           | -3.3031          | -0.3965          | 0.3512           |
| C           | -3.6031          | 1.1663           | 2.1075           | C           | -4.3707          | 0.1712           | -1.6347          |
| C           | -1.0388          | -2.6361          | 1.479            | C           | -4.5797          | -2.0688          | 2.4238           |
| C           | -1.9528          | -1.7793          | 2.3473           | C           | -5.1585          | -1.752           | 1.0496           |
| C           | -3.057           | -1.135           | 1.4981           | C           | -4.0381          | -1.5963          | 0.0143           |
| C           | -3.9197          | -2.2173          | 0.7566           | C           | -3.1573          | -2.8933          | -0.0845          |
| C           | -3.0298          | -3.2073          | -0.0858          | C           | -2.6044          | -3.3445          | 1.3201           |
| C           | -1.8238          | -3.7215          | 0.7531           | C           | -3.7352          | -3.3372          | 2.3894           |
| C           | -5.0426          | -1.6182          | -0.1274          | C           | -2.0001          | -2.7812          | -1.1094          |
| C           | -4.5652          | -0.9802          | -1.4442          | C           | -0.802           | -1.9346          | -0.6505          |
| C           | -3.6658          | -1.9471          | -2.2341          | C           | -0.302           | -2.3626          | 0.7387           |
| C           | -2.5287          | -2.5212          | -1.383           | C           | -1.4348          | -2.4301          | 1.7676           |
| C           | -5.7483          | -0.4286          | -2.2242          | C           | 0.2674           | -1.9215          | -1.7294          |
| C           | -6.3348          | 0.8549           | -1.7316          | C           | 0.1305           | -0.8947          | -2.8045          |



|   |         |         |         |   |         |         |         |
|---|---------|---------|---------|---|---------|---------|---------|
| C | -6.3076 | -0.9504 | -3.328  | C | 1.3246  | -2.7441 | -1.8214 |
| C | -3.8235 | -4.4846 | -0.4912 | C | -2.0811 | -4.8112 | 1.2828  |
| C | -3.9067 | -0.232  | 2.3658  | C | -4.6276 | -1.2249 | -1.3264 |
| O | -4.7352 | -0.5994 | 3.1877  | O | -5.2382 | -1.9744 | -2.0767 |
| C | 7.0967  | -3.1513 | -0.5867 | C | 5.7218  | -3.2377 | -0.5173 |
| C | 6.5458  | -1.7619 | -0.3603 | C | 4.6764  | -2.452  | 0.2379  |
| C | 5.2212  | -1.4722 | -0.3313 | C | 4.6603  | -1.0991 | 0.3214  |
| C | 4.1567  | -2.5774 | -0.5098 | C | 5.7498  | -0.2441 | -0.3569 |
| C | 4.7609  | -4.0041 | -0.3904 | C | 6.5884  | -1.0612 | -1.3791 |
| C | 4.6339  | -0.0785 | -0.1401 | C | 3.6081  | -0.289  | 1.0673  |
| C | 3.58    | -0.0297 | 0.9809  | C | 2.9874  | 0.8333  | 0.2087  |
| C | 2.4762  | -1.0664 | 0.7429  | C | 4.0935  | 1.7422  | -0.3454 |
| C | 3.0666  | -2.4652 | 0.5896  | C | 5.1139  | 0.9323  | -1.1422 |
| C | 2.9744  | 1.3431  | 1.1161  | C | 1.9359  | 1.6534  | 0.924   |
| C | 2.897   | 2.0521  | 2.2396  | C | 1.5176  | 1.532   | 2.1826  |
| O | 2.4187  | 1.8948  | -0.0337 | O | 1.3127  | 2.6284  | 0.144   |
| C | 3.5077  | -2.4332 | -1.9071 | C | 6.7001  | 0.3084  | 0.7318  |
| C | 7.6207  | -0.7324 | -0.1976 | C | 3.669   | -3.3243 | 0.9158  |
| O | 8.8087  | -1.0251 | -0.1117 | O | 3.5126  | -4.5034 | 0.6183  |
| O | -4.5799 | -3.0256 | 1.7625  | O | -4.006  | -3.9742 | -0.5468 |
| C | 6.0765  | -4.1385 | -1.1382 | C | 6.9719  | -2.4337 | -0.8501 |
| O | -5.9075 | 1.4443  | -0.7459 | O | -0.8027 | -0.1021 | -2.8502 |
| H | -7.1866 | 1.2506  | -2.3104 | H | 0.9239  | -0.8895 | -3.5711 |
| H | 2.77    | 5.2889  | -2.2839 | H | 1.0106  | 6.7083  | 0.331   |
| H | 2.7898  | 3.5427  | -2.3877 | H | 1.4919  | 5.3982  | -0.7243 |
| H | 3.7018  | 4.1648  | -0.2534 | H | 1.961   | 4.7407  | 1.5411  |
| H | 2.376   | 5.2686  | 0.0855  | H | 0.3614  | 5.2131  | 2.0963  |
| H | 0.6612  | 4.3779  | -3.2559 | H | -0.6706 | 6.2819  | -1.4585 |
| H | 0.3996  | 5.3597  | -1.8282 | H | -1.3343 | 6.1504  | 0.1578  |
| H | -0.1187 | 1.1495  | 0.4647  | H | -1.0004 | 1.4031  | -0.5645 |
| H | -0.3486 | 2.2165  | 1.8391  | H | -1.6042 | 1.3587  | 1.0838  |
| H | -2.3602 | 3.1776  | 0.955   | H | -3.7086 | 2.3691  | 0.4805  |
| H | -2.1813 | 1.403   | -1.521  | H | -2.8414 | 2.483   | -2.4432 |
| H | -3.3876 | 2.6156  | -1.1496 | H | -4.3405 | 3.0675  | -1.7454 |
| H | -1.7949 | 4.4219  | -1.3757 | H | -3.2396 | 4.8389  | -0.5515 |
| H | -1.7125 | 3.4105  | -2.8018 | H | -2.7443 | 4.899   | -2.2283 |
| H | 0.0236  | 1.0213  | -1.7371 | H | -0.5971 | 2.6565  | -2.331  |
| H | 0.1037  | 1.9132  | -3.2526 | H | -0.5381 | 4.2924  | -2.9735 |
| H | 1.5304  | 1.7588  | -2.2531 | H | 0.7351  | 3.7209  | -1.9173 |
| H | 0.1153  | 4.619   | 1.4772  | H | -1.8151 | 3.5027  | 2.2616  |
| H | -4.0003 | 2.0138  | 2.6317  | H | -4.7408 | 0.6995  | -2.4918 |
| H | -0.2725 | -3.1025 | 2.1091  | H | -5.3995 | -2.1999 | 3.1398  |
| H | -0.5056 | -2.0098 | 0.7554  | H | -3.9822 | -1.2259 | 2.789   |
| H | -2.3861 | -2.3884 | 3.1502  | H | -5.859  | -2.5406 | 0.748   |
| H | -1.3406 | -1.0092 | 2.8344  | H | -5.7439 | -0.8268 | 1.1275  |
| H | -2.1834 | -4.4314 | 1.5106  | H | -4.4151 | -4.1805 | 2.2056  |
| H | -1.1361 | -4.2879 | 0.1118  | H | -3.3085 | -3.5068 | 3.3864  |

|             |                  |                  |                  |             |                  |                  |                  |
|-------------|------------------|------------------|------------------|-------------|------------------|------------------|------------------|
| H           | -5.7763          | -2.4045          | -0.3549          | H           | -1.6513          | -3.7927          | -1.3619          |
| H           | -5.621           | -0.8954          | 0.4611           | H           | -2.3863          | -2.3993          | -2.0632          |
| H           | -3.937           | -0.1177          | -1.2118          | H           | -1.1308          | -0.9008          | -0.5285          |
| H           | -3.2317          | -1.4239          | -3.0958          | H           | 0.4519           | -1.6482          | 1.0916           |
| H           | -4.2514          | -2.7766          | -2.6453          | H           | 0.1993           | -3.3352          | 0.6976           |
| H           | -1.9689          | -3.2423          | -1.9931          | H           | -1.0198          | -2.7929          | 2.7172           |
| H           | -1.8175          | -1.7206          | -1.158           | H           | -1.7853          | -1.4142          | 1.9741           |
| H           | -7.1483          | -0.4826          | -3.8331          | H           | 2.0511           | -2.6794          | -2.6265          |
| H           | -5.9523          | -1.8752          | -3.7702          | H           | 1.4894           | -3.5465          | -1.1083          |
| H           | -4.7361          | -4.2584          | -1.0486          | H           | -1.3129          | -4.9683          | 0.5212           |
| H           | -3.2099          | -5.1384          | -1.1224          | H           | -1.6451          | -5.0921          | 2.2489           |
| H           | -4.1198          | -5.0728          | 0.3846           | H           | -2.8872          | -5.5244          | 1.0771           |
| H           | 7.941            | -3.12            | -1.2864          | H           | 6.0321           | -4.1169          | 0.0607           |
| H           | 7.4848           | -3.5281          | 0.3684           | H           | 5.2707           | -3.6076          | -1.4471          |
| H           | 4.9423           | -4.2518          | 0.6646           | H           | 6.0192           | -1.2024          | -2.3083          |
| H           | 4.0496           | -4.7532          | -0.7604          | H           | 7.4946           | -0.5091          | -1.6584          |
| H           | 4.1937           | 0.2393           | -1.0941          | H           | 2.7896           | -0.9184          | 1.4222           |
| H           | 5.3938           | 0.6705           | 0.0919           | H           | 4.0748           | 0.1352           | 1.9656           |
| H           | 4.0833           | -0.2832          | 1.9254           | H           | 2.4823           | 0.3557           | -0.6435          |
| H           | 1.7775           | -1.0665          | 1.5893           | H           | 3.6655           | 2.5047           | -1.0087          |
| H           | 1.8832           | -0.8113          | -0.144           | H           | 4.5887           | 2.2857           | 0.4684           |
| H           | 3.4916           | -2.7558          | 1.5604           | H           | 4.6053           | 0.5454           | -2.0363          |
| H           | 2.2537           | -3.1746          | 0.3873           | H           | 5.8985           | 1.608            | -1.5064          |
| H           | 3.2269           | 1.8329           | 3.2369           | H           | 1.8049           | 0.8646           | 2.9717           |
| H           | 2.9812           | -1.4814          | -2.0297          | H           | 7.5131           | 0.8914           | 0.2839           |
| H           | 4.2537           | -2.4876          | -2.7074          | H           | 6.1871           | 0.9659           | 1.4408           |
| H           | 2.7745           | -3.2289          | -2.0828          | H           | 7.155            | -0.4967          | 1.3193           |
| H           | 7.308            | 0.3181           | -0.1575          | H           | 3.0595           | -2.8637          | 1.7045           |
| H           | -5.0767          | -2.4277          | 2.3611           | H           | -4.4488          | -3.6896          | -1.3745          |
| H           | 5.9287           | -3.9675          | -2.2106          | H           | 7.6063           | -2.3394          | 0.0387           |
| H           | 6.4625           | -5.1594          | -1.0359          | H           | 7.5641           | -2.9712          | -1.5998          |
| <b>5c-7</b> | <b>X axis(Å)</b> | <b>Y axis(Å)</b> | <b>Z axis(Å)</b> | <b>5c-8</b> | <b>X axis(Å)</b> | <b>Y axis(Å)</b> | <b>Z axis(Å)</b> |
| C           | -2.2252          | 4.5119           | 1.6843           | C           | 2.5945           | 4.6529           | -0.0169          |
| C           | -2.4283          | 4.3673           | 0.1759           | C           | 2.3013           | 3.8285           | 1.2376           |
| C           | -1.5948          | 3.2286           | -0.4316          | C           | 1.553            | 2.5228           | 0.9298           |
| C           | -0.0904          | 3.353            | -0.0493          | C           | 0.2739           | 2.7858           | 0.0825           |
| C           | 0.0906           | 3.3966           | 1.5136           | C           | 0.6203           | 3.5469           | -1.2496          |
| C           | -0.7474          | 4.5733           | 2.0841           | C           | 1.3567           | 4.8677           | -0.8948          |
| C           | 0.8001           | 2.2515           | -0.6625          | C           | -0.5381          | 1.5111           | -0.2227          |
| C           | 2.2915           | 2.4168           | -0.2877          | C           | -1.8175          | 1.8028           | -1.0329          |
| C           | 2.5023           | 2.5769           | 1.2243           | C           | -1.5485          | 2.6458           | -2.2887          |
| C           | 1.5896           | 3.6424           | 1.8368           | C           | -0.7032          | 3.8883           | -1.9903          |
| C           | -0.3365          | 2.0945           | 2.2447           | C           | 1.5108           | 2.7411           | -2.2333          |
| C           | -1.7913          | 3.1998           | -1.9312          | C           | 1.2317           | 1.7995           | 2.2203           |
| O           | -1.3935          | 4.0403           | -2.7257          | O           | 0.4427           | 2.1685           | 3.0795           |
| O           | 0.4059           | 4.6156           | -0.5622          | O           | -0.5999          | 3.6594           | 0.8431           |
| C           | 3.1245           | 1.2802           | -0.8314          | C           | -2.5512          | 0.528            | -1.3724          |

|   |         |         |         |   |         |         |         |
|---|---------|---------|---------|---|---------|---------|---------|
| O | 2.5441  | 0.0116  | -0.8365 | O | -3.8429 | 0.4183  | -0.8612 |
| C | 4.3612  | 1.3882  | -1.3138 | C | -2.079  | -0.506  | -2.0671 |
| C | 1.5465  | -1.9255 | -2.8387 | C | -6.6562 | 0.2067  | -1.7648 |
| C | 2.8231  | -1.1034 | -2.9523 | C | -5.454  | -0.4696 | -2.4116 |
| C | 3.4393  | -0.8575 | -1.5676 | C | -4.394  | -0.8216 | -1.3603 |
| C | 3.7589  | -2.2044 | -0.8293 | C | -4.9708 | -1.7549 | -0.2376 |
| C | 2.5019  | -3.1534 | -0.7613 | C | -6.2757 | -1.1574 | 0.4102  |
| C | 1.8073  | -3.2588 | -2.1497 | C | -7.2705 | -0.676  | -0.6853 |
| C | 4.3604  | -2.0079 | 0.5853  | C | -3.9389 | -2.1159 | 0.8635  |
| C | 3.3587  | -1.5656 | 1.6686  | C | -3.621  | -0.9932 | 1.8709  |
| C | 2.1216  | -2.4806 | 1.689   | C | -4.9135 | -0.3822 | 2.4446  |
| C | 1.4931  | -2.6505 | 0.3033  | C | -5.9219 | 0.0125  | 1.3631  |
| C | 4.0612  | -1.4185 | 3.0099  | C | -2.6435 | -1.4919 | 2.9276  |
| C | 4.9196  | -0.2084 | 3.1887  | C | -1.2178 | -1.6651 | 2.5176  |
| C | 3.9736  | -2.2415 | 4.0677  | C | -2.9122 | -1.7689 | 4.2148  |
| C | 2.9076  | -4.6109 | -0.3919 | C | -7.0514 | -2.2324 | 1.2274  |
| C | 4.6595  | 0.0239  | -1.7197 | C | -3.1944 | -1.4369 | -2.0455 |
| O | 5.7537  | -0.3306 | -2.1366 | O | -3.1343 | -2.5632 | -2.5196 |
| C | -6.8526 | -3.0832 | 0.4577  | C | 7.8726  | -2.6788 | -0.3108 |
| C | -6.2921 | -1.7054 | 0.1878  | C | 7.0063  | -1.5816 | 0.2639  |
| C | -4.9709 | -1.4048 | 0.2468  | C | 5.7778  | -1.2632 | -0.2145 |
| C | -3.919  | -2.4856 | 0.5808  | C | 5.1546  | -2.0366 | -1.3975 |
| C | -4.5043 | -3.923  | 0.5046  | C | 5.9221  | -3.3505 | -1.7132 |
| C | -4.3771 | -0.0202 | 0.0139  | C | 4.8927  | -0.1438 | 0.321   |
| C | -3.2346 | -0.0312 | -1.0183 | C | 3.4687  | -0.6249 | 0.6528  |
| C | -2.1497 | -1.0399 | -0.624  | C | 2.8213  | -1.3    | -0.5621 |
| C | -2.7445 | -2.4319 | -0.4323 | C | 3.6925  | -2.4452 | -1.0721 |
| C | -2.6304 | 1.3384  | -1.1896 | C | 2.6068  | 0.5084  | 1.1436  |
| C | -2.4912 | 1.9922  | -2.3404 | C | 1.9636  | 0.5467  | 2.3077  |
| O | -2.1525 | 1.9544  | -0.038  | O | 2.4515  | 1.5914  | 0.2851  |
| C | -3.3855 | -2.2468 | 2.0136  | C | 5.1794  | -1.1376 | -2.6567 |
| C | -7.3554 | -0.6993 | -0.1264 | C | 7.66    | -0.8641 | 1.4035  |
| O | -8.5311 | -1.0091 | -0.2886 | O | 8.7148  | -1.2405 | 1.904   |
| O | 4.7575  | -2.9121 | -1.6046 | O | -5.3638 | -3.0067 | -0.8542 |
| C | -5.8754 | -4.0233 | 1.1512  | C | 7.4292  | -3.1601 | -1.6861 |
| O | 5.0699  | 0.6335  | 2.3114  | O | -0.8083 | -1.4306 | 1.3866  |
| H | 5.4191  | -0.1102 | 4.1674  | H | -0.532  | -2.0234 | 3.3041  |
| H | -2.7279 | 5.4237  | 2.0284  | H | 2.9963  | 5.6288  | 0.281   |
| H | -2.7214 | 3.6828  | 2.2007  | H | 3.387   | 4.1664  | -0.5962 |
| H | -3.4963 | 4.1998  | -0.0136 | H | 3.2538  | 3.6119  | 1.7382  |
| H | -2.173  | 5.319   | -0.3077 | H | 1.7166  | 4.4418  | 1.9351  |
| H | -0.6748 | 4.5924  | 3.179   | H | 1.6563  | 5.3909  | -1.8119 |
| H | -0.3345 | 5.5299  | 1.7383  | H | 0.6739  | 5.5482  | -0.3696 |
| H | 0.4326  | 1.264   | -0.3616 | H | 0.0875  | 0.7723  | -0.7354 |
| H | 0.7344  | 2.2862  | -1.758  | H | -0.8567 | 1.0532  | 0.721   |
| H | 2.646   | 3.3423  | -0.7641 | H | -2.4805 | 2.3966  | -0.3873 |
| H | 2.3423  | 1.6221  | 1.7367  | H | -1.0521 | 2.0438  | -3.0593 |

|             |                  |                  |                  |              |                  |                  |                  |
|-------------|------------------|------------------|------------------|--------------|------------------|------------------|------------------|
| H           | 3.5451           | 2.855            | 1.4233           | H            | -2.5028          | 2.9648           | -2.7277          |
| H           | 1.9032           | 4.6288           | 1.4717           | H            | -1.3037          | 4.5885           | -1.3955          |
| H           | 1.7456           | 3.6635           | 2.9231           | H            | -0.4876          | 4.4075           | -2.933           |
| H           | 0.1317           | 1.1999           | 1.8255           | H            | 1.1102           | 1.747            | -2.4486          |
| H           | -0.0511          | 2.1396           | 3.3029           | H            | 1.5945           | 3.2678           | -3.1918          |
| H           | -1.415           | 1.9254           | 2.2311           | H            | 2.533            | 2.6025           | -1.8758          |
| H           | 0.1836           | 4.6771           | -1.5148          | H            | -0.7474          | 3.2602           | 1.7259           |
| H           | 5.0119           | 2.2369           | -1.3963          | H            | -1.1233          | -0.6699          | -2.5256          |
| H           | 1.1423           | -2.1087          | -3.8411          | H            | -7.41            | 0.4164           | -2.5328          |
| H           | 0.7822           | -1.3603          | -2.2958          | H            | -6.3667          | 1.176            | -1.3437          |
| H           | 3.5388           | -1.6138          | -3.6089          | H            | -5.7778          | -1.3691          | -2.9501          |
| H           | 2.5754           | -0.1519          | -3.4404          | H            | -5.039           | 0.2131           | -3.1644          |
| H           | 2.4305           | -3.8624          | -2.8237          | H            | -7.7133          | -1.549           | -1.1842          |
| H           | 0.857            | -3.7998          | -2.0528          | H            | -8.1071          | -0.1381          | -0.221           |
| H           | 4.8402           | -2.9448          | 0.9023           | H            | -4.3014          | -2.9963          | 1.4132           |
| H           | 5.1976           | -1.3014          | 0.5267           | H            | -3.0167          | -2.4755          | 0.3908           |
| H           | 2.9823           | -0.5706          | 1.4193           | H            | -3.1089          | -0.1783          | 1.35             |
| H           | 1.3676           | -2.0642          | 2.3693           | H            | -4.6659          | 0.5075           | 3.0378           |
| H           | 2.3746           | -3.4704          | 2.0844           | H            | -5.4018          | -1.0798          | 3.1338           |
| H           | 0.6566           | -3.3567          | 0.3865           | H            | -6.8325          | 0.3785           | 1.8557           |
| H           | 1.0403           | -1.7009          | 0.0024           | H            | -5.5293          | 0.8709           | 0.8104           |
| H           | 4.5035           | -2.0548          | 4.9978           | H            | -2.1516          | -2.1085          | 4.9124           |
| H           | 3.3729           | -3.1446          | 4.0458           | H            | -3.9097          | -1.6707          | 4.6301           |
| H           | 3.4593           | -4.6724          | 0.5497           | H            | -6.4403          | -2.6976          | 2.0051           |
| H           | 2.02             | -5.247           | -0.2918          | H            | -7.9246          | -1.789           | 1.7208           |
| H           | 3.5394           | -5.0639          | -1.1642          | H            | -7.4228          | -3.0393          | 0.5857           |
| H           | -7.7507          | -3.0162          | 1.0839           | H            | 8.9129           | -2.3413          | -0.3959          |
| H           | -7.1605          | -3.5236          | -0.4994          | H            | 7.8657           | -3.5252          | 0.388            |
| H           | -4.5984          | -4.2388          | -0.5436          | H            | 5.6639           | -4.126           | -0.9789          |
| H           | -3.8215          | -4.64            | 0.9778           | H            | 5.6192           | -3.7452          | -2.6913          |
| H           | -4.0184          | 0.363            | 0.978            | H            | 5.3003           | 0.3199           | 1.2216           |
| H           | -5.1195          | 0.7041           | -0.3274          | H            | 4.8611           | 0.6565           | -0.4297          |
| H           | -3.6569          | -0.3491          | -1.9828          | H            | 3.5461           | -1.3752          | 1.4533           |
| H           | -1.385           | -1.0868          | -1.4082          | H            | 1.8352           | -1.6969          | -0.2887          |
| H           | -1.6325          | -0.724           | 0.2902           | H            | 2.6474           | -0.5754          | -1.3669          |
| H           | -3.0886          | -2.7857          | -1.4141          | H            | 3.6926           | -3.2312          | -0.3041          |
| H           | -1.948           | -3.1203          | -0.1218          | H            | 3.2189           | -2.8851          | -1.9593          |
| H           | -2.7584          | 1.7208           | -3.3435          | H            | 1.9138           | -0.1664          | 3.107            |
| H           | -2.8771          | -1.283           | 2.1176           | H            | 4.7828           | -1.6718          | -3.5278          |
| H           | -4.1931          | -2.26            | 2.7536           | H            | 4.578            | -0.2308          | -2.5372          |
| H           | -2.6633          | -3.0212          | 2.2972           | H            | 6.1964           | -0.8129          | -2.9023          |
| H           | -7.0459          | 0.3497           | -0.2082          | H            | 7.157            | 0.0316           | 1.7878           |
| H           | 5.5214           | -2.3123          | -1.7441          | H            | -4.6005          | -3.3567          | -1.3606          |
| H           | -5.8158          | -3.7834          | 2.2189           | H            | 7.7403           | -2.4429          | -2.4543          |
| H           | -6.2467          | -5.0524          | 1.0835           | H            | 7.9302           | -4.1061          | -1.9221          |
| <b>5c-9</b> | <b>X axis(Å)</b> | <b>Y axis(Å)</b> | <b>Z axis(Å)</b> | <b>5c-10</b> | <b>X axis(Å)</b> | <b>Y axis(Å)</b> | <b>Z axis(Å)</b> |
| C           | 2.7907           | 5.0649           | 0.1263           | C            | -2.9095          | 4.5799           | 1.8507           |

|   |         |         |         |   |         |         |         |
|---|---------|---------|---------|---|---------|---------|---------|
| C | 2.3632  | 4.3349  | 1.4001  | C | -3.2616 | 4.3223  | 0.3853  |
| C | 1.6905  | 2.9839  | 1.1145  | C | -2.3998 | 3.2214  | -0.2505 |
| C | 0.5204  | 3.1313  | 0.0978  | C | -0.8797 | 3.4943  | -0.0486 |
| C | 1.0122  | 3.7966  | -1.2404 | C | -0.5354 | 3.6516  | 1.4794  |
| C | 1.6665  | 5.1661  | -0.9099 | C | -1.4085 | 4.7888  | 2.0765  |
| C | -0.218  | 1.8086  | -0.1984 | C | 0.0355  | 2.4339  | -0.6985 |
| C | -1.3934 | 1.996   | -1.179  | C | 1.5369  | 2.7482  | -0.5046 |
| C | -0.9863 | 2.7442  | -2.459  | C | 1.8944  | 3.0171  | 0.9637  |
| C | -0.2159 | 4.0344  | -2.163  | C | 0.9619  | 4.04    | 1.6179  |
| C | 2.0376  | 2.9458  | -2.0371 | C | -0.7628 | 2.3676  | 2.3234  |
| C | 1.2274  | 2.3606  | 2.4111  | C | -2.753  | 3.0787  | -1.7128 |
| O | 0.3317  | 2.7748  | 3.1343  | O | -2.5327 | 3.9015  | -2.5906 |
| O | -0.4631 | 4.0323  | 0.6693  | O | -0.5568 | 4.7585  | -0.6817 |
| C | -2.0522 | 0.6723  | -1.4844 | C | 2.4106  | 1.6601  | -1.0828 |
| O | -3.3174 | 0.4824  | -0.9299 | O | 1.9504  | 0.3462  | -0.9815 |
| C | -1.5469 | -0.3259 | -2.2077 | C | 3.5806  | 1.8535  | -1.6889 |
| C | -6.1302 | 0.1858  | -1.8228 | C | 0.9698  | -1.7871 | -2.7982 |
| C | -4.907  | -0.4274 | -2.4925 | C | 2.1374  | -0.8467 | -3.0655 |
| C | -3.8273 | -0.7645 | -1.4557 | C | 2.8536  | -0.4752 | -1.7586 |
| C | -4.3618 | -1.7467 | -0.3548 | C | 3.3731  | -1.7471 | -0.9993 |
| C | -5.6864 | -1.2185 | 0.3135  | C | 2.2323  | -2.8113 | -0.7774 |
| C | -6.7047 | -0.7481 | -0.7649 | C | 1.4348  | -3.0531 | -2.0907 |
| C | -3.3106 | -2.0935 | 0.7316  | C | 4.0736  | -1.4234 | 0.3449  |
| C | -3.0372 | -0.9878 | 1.7697  | C | 3.1306  | -1.0297 | 1.4982  |
| C | -4.3496 | -0.4455 | 2.3648  | C | 2.0011  | -2.0611 | 1.6678  |
| C | -5.3751 | -0.0608 | 1.2958  | C | 1.2745  | -2.3583 | 0.3537  |
| C | -2.0375 | -1.4833 | 2.8063  | C | 3.9264  | -0.7489 | 2.7638  |
| C | -0.605  | -1.5572 | 2.3936  | C | 4.6866  | 0.5367  | 2.8086  |
| C | -2.2953 | -1.8434 | 4.0748  | C | 3.9959  | -1.5131 | 3.8661  |
| C | -6.415  | -2.3448 | 1.1047  | C | 2.8162  | -4.2018 | -0.3887 |
| C | -2.6099 | -1.3157 | -2.1639 | C | 3.965   | 0.5039  | -2.068  |
| O | -2.5004 | -2.4365 | -2.642  | O | 5.0424  | 0.23    | -2.5786 |
| C | 5.7186  | -3.1867 | -2.0373 | C | -3.2372 | -4.3276 | 2.0089  |
| C | 4.8116  | -2.042  | -1.6468 | C | -2.6545 | -3.0031 | 1.5789  |
| C | 4.2303  | -1.9257 | -0.427  | C | -2.8774 | -2.4637 | 0.3556  |
| C | 4.4905  | -2.9612 | 0.6861  | C | -3.6617 | -3.2212 | -0.7371 |
| C | 5.6841  | -3.8988 | 0.3531  | C | -4.1144 | -4.6422 | -0.2974 |
| C | 3.277   | -0.8108 | -0.0142 | C | -2.4798 | -1.0578 | -0.0642 |
| C | 3.7045  | -0.109  | 1.2919  | C | -3.7262 | -0.2184 | -0.4229 |
| C | 3.8664  | -1.1425 | 2.4166  | C | -4.5795 | -0.9277 | -1.4898 |
| C | 4.8474  | -2.2425 | 2.0146  | C | -4.9111 | -2.3718 | -1.0909 |
| C | 2.7453  | 1.0137  | 1.6202  | C | -3.3043 | 1.1857  | -0.7887 |
| C | 1.9628  | 1.1385  | 2.6904  | C | -3.3568 | 1.7819  | -1.9782 |
| O | 2.6836  | 2.0325  | 0.6703  | O | -2.7924 | 1.9323  | 0.2707  |
| C | 3.2235  | -3.8281 | 0.8799  | C | -2.7899 | -3.4299 | -2.0001 |
| C | 4.6074  | -1.0601 | -2.7592 | C | -1.852  | -2.3306 | 2.6483  |
| O | 5.2057  | -1.1375 | -3.8274 | O | -1.6316 | -2.8497 | 3.7376  |

|   |         |         |         |   |         |         |         |
|---|---------|---------|---------|---|---------|---------|---------|
| O | -4.7078 | -2.9976 | -1.0004 | O | 4.3654  | -2.3913 | -1.8358 |
| C | 5.6567  | -4.3769 | -1.0889 | C | -4.4532 | -4.7239 | 1.1805  |
| O | -0.2026 | -1.2    | 1.2927  | O | 4.6872  | 1.3393  | 1.8827  |
| H | 0.0934  | -1.9535 | 3.1502  | H | 5.2557  | 0.7301  | 3.7336  |
| H | 3.1292  | 6.0746  | 0.3878  | H | -3.4514 | 5.4673  | 2.1994  |
| H | 3.6603  | 4.5605  | -0.3094 | H | -3.2706 | 3.7477  | 2.4648  |
| H | 3.2504  | 4.1922  | 2.0302  | H | -4.3243 | 4.054   | 0.3279  |
| H | 1.6815  | 4.9824  | 1.9664  | H | -3.1475 | 5.2592  | -0.175  |
| H | 2.0645  | 5.6246  | -1.8242 | H | -1.2198 | 4.8838  | 3.1535  |
| H | 0.9074  | 5.8623  | -0.53   | H | -1.1226 | 5.7523  | 1.6347  |
| H | 0.481   | 1.0537  | -0.5756 | H | -0.2045 | 1.44    | -0.3045 |
| H | -0.6363 | 1.41    | 0.7342  | H | -0.1514 | 2.393   | -1.7797 |
| H | -2.1448 | 2.6223  | -0.6768 | H | 1.75    | 3.671   | -1.0635 |
| H | -0.3806 | 2.1024  | -3.1096 | H | 1.8756  | 2.0853  | 1.5392  |
| H | -1.8846 | 2.9938  | -3.0384 | H | 2.9237  | 3.3922  | 1.0298  |
| H | -0.9026 | 4.7585  | -1.7062 | H | 1.1452  | 5.024   | 1.1677  |
| H | 0.1035  | 4.4845  | -3.1117 | H | 1.2318  | 4.142   | 2.6769  |
| H | 1.6901  | 1.9253  | -2.2186 | H | -0.2646 | 1.49    | 1.9029  |
| H | 2.2298  | 3.3984  | -3.0176 | H | -0.3698 | 2.5033  | 3.3385  |
| H | 3.0091  | 2.8688  | -1.5452 | H | -1.8169 | 2.1094  | 2.4412  |
| H | -0.7066 | 3.7045  | 1.5602  | H | -0.8913 | 4.7444  | -1.6028 |
| H | -0.6033 | -0.4289 | -2.707  | H | 4.1397  | 2.7515  | -1.8673 |
| H | -6.8955 | 0.3869  | -2.5817 | H | 0.4961  | -2.0571 | -3.7493 |
| H | -5.8751 | 1.1538  | -1.3773 | H | 0.2031  | -1.2783 | -2.2052 |
| H | -5.1992 | -1.3253 | -3.0514 | H | 2.8375  | -1.3133 | -3.7699 |
| H | -4.524  | 0.2891  | -3.2306 | H | 1.7474  | 0.0513  | -3.5618 |
| H | -7.1155 | -1.6244 | -1.2849 | H | 2.0588  | -3.6171 | -2.7976 |
| H | -7.5593 | -0.2557 | -0.2833 | H | 0.5636  | -3.6878 | -1.887  |
| H | -3.6323 | -3.0045 | 1.2563  | H | 4.6733  | -2.2915 | 0.6532  |
| H | -2.3744 | -2.3978 | 0.247   | H | 4.8252  | -0.6416 | 0.1801  |
| H | -2.5616 | -0.138  | 1.2703  | H | 2.6337  | -0.0897 | 1.2456  |
| H | -4.1346 | 0.4364  | 2.982   | H | 1.2718  | -1.6887 | 2.3983  |
| H | -4.8083 | -1.1799 | 3.0355  | H | 2.3884  | -3.0008 | 2.0764  |
| H | -6.2975 | 0.2576  | 1.7991  | H | 0.5247  | -3.1381 | 0.5397  |
| H | -5.016  | 0.8255  | 0.7644  | H | 0.7049  | -1.4721 | 0.0586  |
| H | -1.5201 | -2.1773 | 4.759   | H | 4.58    | -1.2302 | 4.7376  |
| H | -3.2989 | -1.8243 | 4.4866  | H | 3.4721  | -2.4603 | 3.9442  |
| H | -5.7813 | -2.8075 | 1.8656  | H | 3.4528  | -4.162  | 0.4989  |
| H | -7.3013 | -1.9492 | 1.6149  | H | 2.0107  | -4.9161 | -0.1803 |
| H | -6.7593 | -3.1474 | 0.4428  | H | 3.4198  | -4.6285 | -1.1977 |
| H | 5.4684  | -3.5488 | -3.0421 | H | -2.4607 | -5.0988 | 1.9321  |
| H | 6.7492  | -2.8112 | -2.0786 | H | -3.5543 | -4.2902 | 3.058   |
| H | 6.6357  | -3.3755 | 0.5202  | H | -4.9764 | -4.9709 | -0.8914 |
| H | 5.6909  | -4.7644 | 1.0273  | H | -3.3166 | -5.3713 | -0.4973 |
| H | 3.1732  | -0.0514 | -0.7905 | H | -1.9177 | -0.5333 | 0.7103  |
| H | 2.2731  | -1.2379 | 0.1018  | H | -1.7942 | -1.1086 | -0.9172 |
| H | 4.6878  | 0.3544  | 1.1249  | H | -4.3502 | -0.1356 | 0.4795  |

|             |                  |                  |                  |             |                  |                  |                  |
|-------------|------------------|------------------|------------------|-------------|------------------|------------------|------------------|
| H           | 4.2407           | -0.6527          | 3.3244           | H           | -5.5176          | -0.3781          | -1.639           |
| H           | 2.8995           | -1.5886          | 2.6783           | H           | -4.0668          | -0.9294          | -2.4587          |
| H           | 5.8433           | -1.7857          | 1.93             | H           | -5.5962          | -2.3427          | -0.2332          |
| H           | 4.9152           | -2.974           | 2.8302           | H           | -5.4667          | -2.8422          | -1.9122          |
| H           | 1.8206           | 0.5058           | 3.5442           | H           | -3.6925          | 1.4336           | -2.9358          |
| H           | 3.3909           | -4.6032          | 1.6367           | H           | -3.34            | -3.9945          | -2.7623          |
| H           | 2.3592           | -3.2428          | 1.2088           | H           | -2.4689          | -2.4956          | -2.4682          |
| H           | 2.9307           | -4.3299          | -0.0489          | H           | -1.8829          | -3.9961          | -1.7586          |
| H           | 3.8915           | -0.2472          | -2.5886          | H           | -1.4372          | -1.3417          | 2.4187           |
| H           | -3.9342          | -3.3034          | -1.5201          | H           | 5.0512           | -1.7289          | -2.0675          |
| H           | 4.7526           | -4.9654          | -1.282           | H           | -4.7566          | -5.745           | 1.4384           |
| H           | 6.5075           | -5.0414          | -1.2791          | H           | -5.3024          | -4.0707          | 1.4147           |
| <b>5d-1</b> | <b>X axis(Å)</b> | <b>Y axis(Å)</b> | <b>Z axis(Å)</b> | <b>5d-2</b> | <b>X axis(Å)</b> | <b>Y axis(Å)</b> | <b>Z axis(Å)</b> |
| C           | -2.3265          | 5.0331           | -1.1273          | C           | -2.3812          | 5.0591           | -0.9536          |
| C           | -2.39            | 4.596            | 0.3344           | C           | -2.3943          | 4.5612           | 0.4899           |
| C           | -1.5446          | 3.3386           | 0.6168           | C           | -1.5398          | 3.2938           | 0.6884           |
| C           | -0.0759          | 3.5244           | 0.1375           | C           | -0.087           | 3.5046           | 0.1718           |
| C           | -0.0252          | 3.9074           | -1.3904          | C           | -0.0883          | 3.9503           | -1.3403          |
| C           | -0.8899          | 5.175            | -1.6325          | C           | -0.9628          | 5.2243           | -1.5016          |
| C           | 0.857            | 2.3214           | 0.4225           | C           | 0.863            | 2.2972           | 0.3796           |
| C           | 2.3104           | 2.6197           | -0.0104          | C           | 2.3005           | 2.6293           | -0.0864          |
| C           | 2.4029           | 3.0895           | -1.4723          | C           | 2.3376           | 3.1472           | -1.5342          |
| C           | 1.4412           | 4.2362           | -1.7815          | C           | 1.3626           | 4.3              | -1.7676          |
| C           | -0.5262          | 2.7858           | -2.339           | C           | -0.6182          | 2.8669           | -2.3171          |
| C           | -1.6338          | 3.0173           | 2.0915           | C           | -1.5812          | 2.9047           | 2.1484           |
| O           | -1.0753          | 3.6253           | 2.9947           | O           | -0.9798          | 3.4602           | 3.058            |
| O           | 0.4854           | 4.6533           | 0.8619           | O           | 0.492            | 4.6066           | 0.9239           |
| C           | 3.241            | 1.4527           | 0.2013           | C           | 3.2626           | 1.4764           | 0.0464           |
| O           | 2.9811           | 0.2896           | -0.5233          | O           | 2.9238           | 0.2823           | -0.5882          |
| C           | 4.3283           | 1.4643           | 0.97             | C           | 4.4449           | 1.5306           | 0.6571           |
| C           | 4.1654           | -0.9945          | -2.9138          | C           | 3.7596           | -1.0905          | -3.0624          |
| C           | 4.9394           | -0.3598          | -1.7643          | C           | 4.6895           | -0.4006          | -2.0705          |
| C           | 4.1772           | -0.5218          | -0.4407          | C           | 4.134            | -0.5115          | -0.6433          |
| C           | 3.9159           | -2.0313          | -0.1122          | C           | 3.9557           | -2.0085          | -0.2165          |
| C           | 3.1936           | -2.7772          | -1.296           | C           | 3.0748           | -2.8138          | -1.242           |
| C           | 3.8952           | -2.4715          | -2.651           | C           | 3.5517           | -2.557           | -2.7013          |
| C           | 3.149            | -2.2591          | 1.2128           | C           | 3.4071           | -2.192           | 1.2192           |
| C           | 1.6423           | -1.9495          | 1.1595           | C           | 1.9103           | -1.878           | 1.3961           |
| C           | 0.9526           | -2.6025          | -0.0472          | C           | 1.0577           | -2.6014          | 0.3417           |
| C           | 1.699            | -2.3742          | -1.3633          | C           | 1.5815           | -2.4339          | -1.0873          |
| C           | 0.9438           | -2.3307          | 2.4546           | C           | 1.385            | -2.1684          | 2.796            |
| C           | 0.1026           | -1.3058          | 3.1305           | C           | 0.2052           | -1.3832          | 3.2594           |
| C           | 1.0118           | -3.5318          | 3.0532           | C           | 1.8853           | -3.0424          | 3.6855           |
| C           | 3.2683           | -4.3233          | -1.1292          | C           | 3.2032           | -4.3509          | -1.0296          |
| C           | 4.9315           | 0.176            | 0.6701           | C           | 5.0267           | 0.2423           | 0.3179           |
| O           | 5.9203           | -0.2511          | 1.2501           | O           | 6.0992           | -0.1443          | 0.7614           |
| C           | -4.4349          | -4.4237          | -0.4283          | C           | -4.4945          | -4.423           | -0.4793          |

|   |         |         |         |   |         |         |         |
|---|---------|---------|---------|---|---------|---------|---------|
| C | -3.5867 | -3.2753 | 0.0667  | C | -3.6348 | -3.2834 | 0.0151  |
| C | -3.7531 | -1.9897 | -0.331  | C | -3.8016 | -1.9946 | -0.3706 |
| C | -4.9028 | -1.5877 | -1.2796 | C | -4.9718 | -1.5727 | -1.2833 |
| C | -5.9416 | -2.7289 | -1.4654 | C | -6.0194 | -2.7076 | -1.4582 |
| C | -2.8691 | -0.8172 | 0.0805  | C | -2.8983 | -0.8347 | 0.0279  |
| C | -3.6815 | 0.3352  | 0.6914  | C | -3.6881 | 0.2982  | 0.6986  |
| C | -4.7848 | 0.7945  | -0.2724 | C | -4.8122 | 0.7891  | -0.2257 |
| C | -5.6747 | -0.3754 | -0.6899 | C | -5.7203 | -0.3652 | -0.6523 |
| C | -2.7877 | 1.4864  | 1.0719  | C | -2.7791 | 1.4301  | 1.0989  |
| C | -2.515  | 1.8827  | 2.3137  | C | -2.468  | 1.771   | 2.3481  |
| O | -2.1933 | 2.1905  | 0.027   | O | -2.2076 | 2.173   | 0.0684  |
| C | -4.3229 | -1.2229 | -2.6664 | C | -4.4288 | -1.188  | -2.6793 |
| C | -2.5377 | -3.7037 | 1.0427  | C | -2.58   | -3.7205 | 0.9824  |
| O | -2.3834 | -4.8701 | 1.3891  | O | -2.3885 | -4.8972 | 1.2713  |
| O | 5.2025  | -2.6801 | 0.0494  | O | 5.2647  | -2.6327 | -0.2291 |
| C | -5.2802 | -4.0845 | -1.6493 | C | -5.3668 | -4.0632 | -1.6758 |
| O | -0.1751 | -0.2297 | 2.6157  | O | -0.3796 | -0.578  | 2.545   |
| H | -0.2875 | -1.5808 | 4.1252  | H | -0.1271 | -1.5735 | 4.2941  |
| H | -2.8787 | 4.3198  | -1.7491 | H | -2.9541 | 4.3715  | -1.5854 |
| H | -2.8432 | 5.9938  | -1.2384 | H | -2.9017 | 6.0228  | -1.0067 |
| H | -2.0542 | 5.4263  | 0.9692  | H | -2.0367 | 5.364   | 1.1476  |
| H | -3.4419 | 4.4169  | 0.5921  | H | -3.4368 | 4.3702  | 0.7757  |
| H | -0.433  | 6.0405  | -1.1348 | H | -0.4903 | 6.0704  | -0.9855 |
| H | -0.9105 | 5.4195  | -2.7023 | H | -1.0204 | 5.5115  | -2.5594 |
| H | 0.8737  | 2.1143  | 1.5     | H | 0.9139  | 2.0424  | 1.4459  |
| H | 0.4828  | 1.4132  | -0.0631 | H | 0.4804  | 1.4078  | -0.1335 |
| H | 2.675   | 3.4475  | 0.6147  | H | 2.6734  | 3.4406  | 0.5551  |
| H | 3.4266  | 3.422   | -1.6889 | H | 3.351   | 3.4924  | -1.778  |
| H | 2.209   | 2.2555  | -2.1581 | H | 2.1218  | 2.3339  | -2.2383 |
| H | 1.505   | 4.4771  | -2.8504 | H | 1.3898  | 4.5816  | -2.8282 |
| H | 1.7849  | 5.1349  | -1.2532 | H | 1.721   | 5.1796  | -1.2172 |
| H | -0.0192 | 1.832   | -2.1711 | H | -0.1075 | 1.9073  | -2.2014 |
| H | -1.5981 | 2.5972  | -2.254  | H | -1.6875 | 2.6753  | -2.2084 |
| H | -0.3484 | 3.0626  | -3.3855 | H | -0.4712 | 3.1844  | -3.3567 |
| H | 0.3567  | 4.4927  | 1.8215  | H | 0.3922  | 4.4076  | 1.8795  |
| H | 4.7382  | 2.2303  | 1.5996  | H | 4.9273  | 2.3278  | 1.189   |
| H | 3.223   | -0.46   | -3.0781 | H | 2.7955  | -0.5709 | -3.1039 |
| H | 4.7439  | -0.8921 | -3.8395 | H | 4.1899  | -1.0235 | -4.0685 |
| H | 5.938   | -0.8086 | -1.6931 | H | 5.6937  | -0.8381 | -2.1312 |
| H | 5.0914  | 0.7017  | -1.9983 | H | 4.7897  | 0.651   | -2.3685 |
| H | 4.86    | -2.9958 | -2.6875 | H | 4.5059  | -3.0757 | -2.8678 |
| H | 3.301   | -2.8766 | -3.4803 | H | 2.8408  | -2.9997 | -3.4109 |
| H | 3.311   | -3.2997 | 1.5227  | H | 3.6118  | -3.227  | 1.5208  |
| H | 3.6112  | -1.6777 | 2.0213  | H | 3.9936  | -1.5925 | 1.9274  |
| H | 1.5462  | -0.867  | 1.036   | H | 1.7935  | -0.8006 | 1.2412  |
| H | 0.8283  | -3.6798 | 0.1165  | H | 0.9846  | -3.6689 | 0.5836  |
| H | -0.0615 | -2.1988 | -0.1512 | H | 0.0321  | -2.2185 | 0.37    |



|             |                  |                  |                  |             |                  |                  |                  |
|-------------|------------------|------------------|------------------|-------------|------------------|------------------|------------------|
| H           | 1.1935           | -2.9473          | -2.1518          | H           | 0.9682           | -3.0532          | -1.7552          |
| H           | 1.5851           | -1.3256          | -1.6541          | H           | 1.4014           | -1.4034          | -1.4081          |
| H           | 0.4873           | -3.7624          | 3.9762           | H           | 1.4547           | -3.185           | 4.673            |
| H           | 1.5847           | -4.3474          | 2.6202           | H           | 2.7419           | -3.6693          | 3.4603           |
| H           | 2.8379           | -4.6693          | -0.1857          | H           | 2.9214           | -4.6655          | -0.0214          |
| H           | 2.7251           | -4.827           | -1.9378          | H           | 2.5576           | -4.8939          | -1.7302          |
| H           | 4.3018           | -4.6856          | -1.1645          | H           | 4.2273           | -4.7001          | -1.2026          |
| H           | -3.8035          | -5.2823          | -0.6877          | H           | -3.8697          | -5.2777          | -0.7661          |
| H           | -5.0936          | -4.7441          | 0.3891           | H           | -5.1357          | -4.7559          | 0.347            |
| H           | -6.6018          | -2.7884          | -0.5891          | H           | -6.6581          | -2.7767          | -0.5669          |
| H           | -6.5937          | -2.5181          | -2.3223          | H           | -6.6915          | -2.4836          | -2.2961          |
| H           | -2.0963          | -1.1026          | 0.7945           | H           | -2.0943          | -1.1402          | 0.6953           |
| H           | -2.3194          | -0.4693          | -0.8038          | H           | -2.3868          | -0.4641          | -0.87            |
| H           | -4.1685          | -0.0421          | 1.6025           | H           | -4.1555          | -0.1077          | 1.6078           |
| H           | -5.4051          | 1.5611           | 0.2093           | H           | -5.4155          | 1.5467           | 0.2905           |
| H           | -4.3547          | 1.2648           | -1.165           | H           | -4.3999          | 1.2793           | -1.1161          |
| H           | -6.2389          | -0.6957          | 0.1971           | H           | -6.2694          | -0.6997          | 0.239            |
| H           | -6.4189          | -0.0167          | -1.4126          | H           | -6.4759          | 0.0151           | -1.3517          |
| H           | -2.8231          | 1.4931           | 3.2638           | H           | -2.7503          | 1.3387           | 3.2878           |
| H           | -5.1238          | -0.9809          | -3.3747          | H           | -5.2482          | -0.939           | -3.3635          |
| H           | -3.6583          | -0.3542          | -2.6302          | H           | -3.7666          | -0.3172          | -2.6486          |
| H           | -3.7429          | -2.0493          | -3.0916          | H           | -3.8578          | -2.0071          | -3.13            |
| H           | -1.9031          | -2.9195          | 1.4675           | H           | -1.9823          | -2.935           | 1.459            |
| H           | 5.715            | -2.1872          | 0.7251           | H           | 5.8649           | -2.1046          | 0.3391           |
| H           | -4.658           | -4.0897          | -2.5516          | H           | -4.7654          | -4.0574          | -2.5921          |
| H           | -6.044           | -4.8577          | -1.7923          | H           | -6.1364          | -4.8318          | -1.8123          |
| <b>5d-3</b> | <b>X axis(Å)</b> | <b>Y axis(Å)</b> | <b>Z axis(Å)</b> | <b>5d-4</b> | <b>X axis(Å)</b> | <b>Y axis(Å)</b> | <b>Z axis(Å)</b> |
| C           | -2.2901          | 4.9798           | -1.0735          | C           | -2.2669          | 5.0311           | -1.0781          |
| C           | -1.9008          | 4.6191           | 0.3633           | C           | -2.3507          | 4.571            | 0.3756           |
| C           | -1.1358          | 3.2913           | 0.4475           | C           | -1.514           | 3.3059           | 0.6476           |
| C           | 0.0896           | 3.2903           | -0.5124          | C           | -0.0386          | 3.4937           | 0.19             |
| C           | -0.3536          | 3.5453           | -1.9992          | C           | 0.0336           | 3.9005           | -1.3306          |
| C           | -1.1181          | 4.897            | -2.0612          | C           | -0.8234          | 5.1751           | -1.5635          |
| C           | 0.955            | 2.0191           | -0.4145          | C           | 0.8861           | 2.2831           | 0.4684           |
| C           | 2.1914           | 2.079            | -1.3345          | C           | 2.3462           | 2.5841           | 0.0616           |
| C           | 1.7998           | 2.3807           | -2.7878          | C           | 2.4605           | 3.0749           | -1.3918          |
| C           | 0.9148           | 3.6297           | -2.8954          | C           | 1.5066           | 4.2295           | -1.6971          |
| C           | -1.2646          | 2.4406           | -2.5983          | C           | -0.4589          | 2.7961           | -2.3035          |
| C           | -0.7268          | 2.9934           | 1.875            | C           | -1.62            | 2.9594           | 2.1155           |
| O           | 0.0682           | 3.6288           | 2.553            | O           | -1.074           | 3.5536           | 3.0353           |
| O           | 0.9484           | 4.3987           | -0.1392          | O           | 0.5169           | 4.6092           | 0.9393           |
| C           | 3.0348           | 0.8299           | -1.2435          | C           | 3.2699           | 1.4119           | 0.2741           |
| O           | 2.3784           | -0.3917          | -1.0799          | O           | 3.0383           | 0.2695           | -0.4921          |
| C           | 4.3663           | 0.8167           | -1.2482          | C           | 4.3274           | 1.4016           | 1.0833           |
| C           | 1.9864           | -3.0427          | -2.3539          | C           | 4.32             | -0.9423          | -2.8726          |
| C           | 3.2721           | -2.2248          | -2.3524          | C           | 5.0455           | -0.3416          | -1.6745          |
| C           | 3.4018           | -1.4183          | -1.0551          | C           | 4.2315           | -0.5436          | -0.3876          |

|   |         |         |         |   |         |         |         |
|---|---------|---------|---------|---|---------|---------|---------|
| C | 3.3685  | -2.3461 | 0.2173  | C | 3.959   | -2.0622 | -0.115  |
| C | 2.1207  | -3.3086 | 0.2239  | C | 3.2867  | -2.7725 | -1.3493 |
| C | 1.9384  | -3.9909 | -1.1622 | C | 4.0428  | -2.4267 | -2.6647 |
| C | 3.4543  | -1.5669 | 1.5574  | C | 3.1387  | -2.3294 | 1.1701  |
| C | 2.1593  | -0.8465 | 1.9726  | C | 1.6345  | -2.0212 | 1.0643  |
| C | 0.9589  | -1.8051 | 1.9535  | C | 0.996   | -2.6364 | -0.19   |
| C | 0.8353  | -2.5368 | 0.6149  | C | 1.7959  | -2.3672 | -1.4661 |
| C | 2.3504  | -0.0897 | 3.2761  | C | 0.8881  | -2.4474 | 2.3182  |
| C | 3.0699  | 1.2185  | 3.1922  | C | 0.0491  | -1.4376 | 3.0192  |
| C | 1.9117  | -0.4512 | 4.4927  | C | 0.9117  | -3.678  | 2.8574  |
| C | 2.306   | -4.4774 | 1.237   | C | 3.3564  | -4.3228 | -1.2256 |
| C | 4.6704  | -0.5941 | -1.0969 | C | 4.9412  | 0.1211  | 0.7718  |
| O | 5.8115  | -1.0252 | -1.0003 | O | 5.9057  | -0.3241 | 1.3784  |
| C | -4.5016 | -4.0587 | -0.8681 | C | -4.7863 | -4.2367 | -0.3387 |
| C | -3.5575 | -2.8838 | -0.7676 | C | -3.7271 | -3.211  | -0.0162 |
| C | -3.9027 | -1.6745 | -0.2611 | C | -3.7571 | -1.9406 | -0.4878 |
| C | -5.3409 | -1.3965 | 0.2228  | C | -4.8418 | -1.4689 | -1.4794 |
| C | -6.154  | -2.7046 | 0.4269  | C | -5.7981 | -2.6094 | -1.9275 |
| C | -2.96   | -0.4824 | -0.143  | C | -2.8339 | -0.8142 | -0.042  |
| C | -2.9983 | 0.1928  | 1.2451  | C | -3.6469 | 0.2996  | 0.6459  |
| C | -4.4322 | 0.5699  | 1.6276  | C | -4.8036 | 0.7955  | -0.2404 |
| C | -5.3376 | -0.6579 | 1.5865  | C | -5.6623 | -0.3579 | -0.7727 |
| C | -2.109  | 1.4096  | 1.3121  | C | -2.7603 | 1.4453  | 1.0566  |
| C | -1.3752 | 1.7826  | 2.3577  | C | -2.4981 | 1.8172  | 2.308   |
| O | -2.0478 | 2.2027  | 0.1738  | O | -2.1602 | 2.171   | 0.0301  |
| C | -6.059  | -0.5265 | -0.8371 | C | -4.2082 | -0.9147 | -2.7794 |
| C | -2.2046 | -3.1742 | -1.3344 | C | -2.6723 | -3.7133 | 0.9158  |
| O | -1.8286 | -4.3112 | -1.5972 | O | -2.69   | -4.8372 | 1.4059  |
| O | 4.5331  | -3.2089 | 0.1738  | O | 5.2385  | -2.7158 | 0.0796  |
| C | -5.971  | -3.6871 | -0.7183 | C | -6.0876 | -3.6067 | -0.8194 |
| O | 3.5159  | 1.6602  | 2.1396  | O | -0.1793 | -0.327  | 2.5562  |
| H | 3.18    | 1.7724  | 4.1399  | H | -0.3853 | -1.7554 | 3.9824  |
| H | -3.1033 | 4.3241  | -1.4043 | H | -2.814  | 4.3301  | -1.7181 |
| H | -2.6999 | 5.9969  | -1.0891 | H | -2.7784 | 5.9956  | -1.1803 |
| H | -1.2957 | 5.4321  | 0.7841  | H | -2.0198 | 5.3894  | 1.028   |
| H | -2.8161 | 4.5695  | 0.967   | H | -3.4064 | 4.3916  | 0.6171  |
| H | -0.4303 | 5.7262  | -1.8499 | H | -0.3695 | 6.0309  | -1.0468 |
| H | -1.4947 | 5.0711  | -3.0772 | H | -0.8299 | 5.4363  | -2.6295 |
| H | 1.3209  | 1.9185  | 0.612   | H | 0.8867  | 2.0582  | 1.5424  |
| H | 0.3542  | 1.1278  | -0.6268 | H | 0.5166  | 1.3842  | -0.0376 |
| H | 2.8165  | 2.9152  | -0.9886 | H | 2.7032  | 3.4025  | 0.7033  |
| H | 2.7033  | 2.5397  | -3.3905 | H | 3.4883  | 3.407   | -1.5893 |
| H | 1.2885  | 1.518   | -3.232  | H | 2.273   | 2.252   | -2.0925 |
| H | 0.6299  | 3.7762  | -3.9451 | H | 1.5856  | 4.4859  | -2.7614 |
| H | 1.5134  | 4.5087  | -2.6237 | H | 1.8462  | 5.1191  | -1.151  |
| H | -0.8554 | 1.4361  | -2.4613 | H | 0.0424  | 1.8378  | -2.1443 |
| H | -2.2724 | 2.4381  | -2.1787 | H | -1.5325 | 2.6103  | -2.2356 |

|             |                  |                  |                  |             |                  |                  |                  |
|-------------|------------------|------------------|------------------|-------------|------------------|------------------|------------------|
| H           | -1.3912          | 2.592            | -3.6773          | H           | -0.2664          | 3.0889           | -3.343           |
| H           | 1.2202           | 4.2814           | 0.7951           | H           | 0.3749           | 4.4347           | 1.8945           |
| H           | 5.075            | 1.619            | -1.3191          | H           | 4.7121           | 2.1491           | 1.7498           |
| H           | 1.1129           | -2.3811          | -2.3499          | H           | 3.3839           | -0.404           | -3.0589          |
| H           | 1.9293           | -3.6248          | -3.2811          | H           | 4.9352           | -0.8119          | -3.7706          |
| H           | 4.1358           | -2.8884          | -2.484           | H           | 6.0414           | -0.7915          | -1.5766          |
| H           | 3.2559           | -1.5551          | -3.222           | H           | 5.2047           | 0.7265           | -1.8706          |
| H           | 2.7279           | -4.7415          | -1.3054          | H           | 5.0094           | -2.9487          | -2.6768          |
| H           | 0.9912           | -4.5442          | -1.1854          | H           | 3.484            | -2.8077          | -3.5292          |
| H           | 3.7501           | -2.2609          | 2.3568           | H           | 3.2903           | -3.3782          | 1.457            |
| H           | 4.2896           | -0.8571          | 1.5139           | H           | 3.5656           | -1.7705          | 2.0132           |
| H           | 1.9276           | -0.0901          | 1.2238           | H           | 1.5387           | -0.9357          | 0.9706           |
| H           | 1.0312           | -2.5416          | 2.7609           | H           | 0.8662           | -3.7183          | -0.0662          |
| H           | 0.0338           | -1.2433          | 2.1344           | H           | -0.0138          | -2.2297          | -0.3231          |
| H           | -0.0113          | -3.2318          | 0.6795           | H           | 1.3242           | -2.9155          | -2.2924          |
| H           | 0.5643           | -1.8107          | -0.1578          | H           | 1.6928           | -1.31            | -1.7286          |
| H           | 2.0812           | 0.1568           | 5.3773           | H           | 0.3538           | -3.9418          | 3.7516           |
| H           | 1.3777           | -1.3814          | 4.6571           | H           | 1.4829           | -4.483           | 2.4029           |
| H           | 2.5094           | -4.1297          | 2.2532           | H           | 2.8891           | -4.6966          | -0.3107          |
| H           | 1.4047           | -5.1007          | 1.2793           | H           | 2.8466           | -4.8023          | -2.0698          |
| H           | 3.1348           | -5.1349          | 0.9512           | H           | 4.3909           | -4.684           | -1.2301          |
| H           | -4.3825          | -4.5664          | -1.8333          | H           | -4.3953          | -4.9187          | -1.104           |
| H           | -4.2313          | -4.7838          | -0.0896          | H           | -5.0229          | -4.8432          | 0.5437           |
| H           | -5.8418          | -3.202           | 1.3556           | H           | -6.7413          | -2.1924          | -2.3025          |
| H           | -7.2207          | -2.4765          | 0.5467           | H           | -5.3567          | -3.1618          | -2.769           |
| H           | -1.9196          | -0.7562          | -0.3358          | H           | -2.0649          | -1.1478          | 0.6556           |
| H           | -3.2343          | 0.2356           | -0.9263          | H           | -2.2801          | -0.4275          | -0.9056          |
| H           | -2.6315          | -0.5391          | 1.9797           | H           | -4.0953          | -0.1323          | 1.5531           |
| H           | -4.4532          | 0.9894           | 2.6417           | H           | -5.4428          | 1.4776           | 0.335            |
| H           | -4.8198          | 1.3521           | 0.9638           | H           | -4.4213          | 1.3824           | -1.0844          |
| H           | -5.0064          | -1.3454          | 2.3772           | H           | -6.2199          | -0.7853          | 0.071            |
| H           | -6.3588          | -0.356           | 1.8526           | H           | -6.4131          | 0.0526           | -1.4601          |
| H           | -1.2548          | 1.3407           | 3.3278           | H           | -2.8128          | 1.4079           | 3.2477           |
| H           | -7.0989          | -0.335           | -0.5481          | H           | -4.9852          | -0.6297          | -3.4987          |
| H           | -5.5783          | 0.4473           | -0.9746          | H           | -3.5878          | -0.0289          | -2.6178          |
| H           | -6.0727          | -1.0114          | -1.8193          | H           | -3.5727          | -1.6695          | -3.2579          |
| H           | -1.549           | -2.3142          | -1.5233          | H           | -1.8504          | -3.029           | 1.1488           |
| H           | 5.3314           | -2.6537          | 0.0454           | H           | 5.723            | -2.2426          | 0.7892           |
| H           | -6.3475          | -3.26            | -1.6547          | H           | -6.7604          | -4.3896          | -1.1878          |
| H           | -6.5603          | -4.5924          | -0.5317          | H           | -6.6012          | -3.1141          | 0.0146           |
| <b>5d-5</b> | <b>X axis(Å)</b> | <b>Y axis(Å)</b> | <b>Z axis(Å)</b> | <b>5d-6</b> | <b>X axis(Å)</b> | <b>Y axis(Å)</b> | <b>Z axis(Å)</b> |
| C           | -2.3421          | 5.0588           | -0.8795          | C           | 1.8438           | 4.7569           | 1.4174           |
| C           | -2.3713          | 4.5287           | 0.5524           | C           | 1.9031           | 4.4581           | -0.0797          |
| C           | -1.521           | 3.2559           | 0.7307           | C           | 1.0517           | 3.243            | -0.4837          |
| C           | -0.0625          | 3.4761           | 0.2346           | C           | -0.4089          | 3.3635           | 0.0392           |
| C           | -0.0467          | 3.9545           | -1.2673          | C           | -0.4412          | 3.5873           | 1.5961           |
| C           | -0.9179          | 5.2333           | -1.4096          | C           | 0.4095           | 4.838            | 1.9466           |

|   |         |         |         |   |         |         |         |
|---|---------|---------|---------|---|---------|---------|---------|
| C | 0.884   | 2.2632  | 0.4268  | C | -1.3041 | 2.1673  | -0.3445 |
| C | 2.3268  | 2.6049  | -0.0145 | C | -2.7557 | 2.3372  | 0.145   |
| C | 2.3806  | 3.1519  | -1.4511 | C | -2.8474 | 2.6995  | 1.6376  |
| C | 1.4094  | 4.3108  | -1.6712 | C | -1.9103 | 3.8432  | 2.0322  |
| C | -0.5676 | 2.8937  | -2.2733 | C | 0.0944  | 2.3874  | 2.423   |
| C | -1.5759 | 2.8322  | 2.1806  | C | 1.1017  | 3.0839  | -1.9854 |
| O | -0.9868 | 3.3687  | 3.1093  | O | 0.5969  | 3.8359  | -2.8074 |
| O | 0.5093  | 4.5608  | 1.0167  | O | -1.0081 | 4.5418  | -0.5592 |
| C | 3.2882  | 1.4504  | 0.1088  | C | -3.5676 | 1.1003  | -0.1474 |
| O | 2.965   | 0.2714  | -0.5615 | O | -3.2477 | -0.0494 | 0.5767  |
| C | 4.458   | 1.4921  | 0.744   | C | -4.5646 | 1.0136  | -1.0253 |
| C | 3.8568  | -1.0286 | -3.0564 | C | -4.5168 | -1.6129 | 2.7543  |
| C | 4.763   | -0.3627 | -2.0271 | C | -5.2273 | -1.0231 | 1.5428  |
| C | 4.1795  | -0.5161 | -0.615  | C | -4.2998 | -1.0073 | 0.3188  |
| C | 3.9998  | -2.0251 | -0.2337 | C | -3.7823 | -2.445  | -0.0347 |
| C | 3.1452  | -2.8059 | -1.2997 | C | -3.1254 | -3.1606 | 1.2063  |
| C | 3.6503  | -2.5057 | -2.7411 | C | -4.0258 | -3.0262 | 2.468   |
| C | 3.4221  | -2.2512 | 1.1845  | C | -2.8183 | -2.4772 | -1.2476 |
| C | 1.9197  | -1.9516 | 1.3386  | C | -1.3847 | -1.9909 | -0.9695 |
| C | 1.0947  | -2.6509 | 0.2467  | C | -0.7847 | -2.6555 | 0.2809  |
| C | 1.6469  | -2.4385 | -1.1655 | C | -1.7177 | -2.5769 | 1.4914  |
| C | 1.3668  | -2.2856 | 2.7182  | C | -0.5417 | -2.1512 | -2.2254 |
| C | 0.168   | -1.5262 | 3.1761  | C | -0.605  | -1.0495 | -3.2293 |
| C | 1.8569  | -3.178  | 3.595   | C | 0.2611  | -3.1843 | -2.53   |
| C | 3.2785  | -4.3477 | -1.1279 | C | -2.9765 | -4.6924 | 0.9674  |
| C | 5.05    | 0.2141  | 0.3842  | C | -5.0191 | -0.3553 | -0.8424 |
| O | 6.1138  | -0.1819 | 0.84    | O | -5.8757 | -0.8775 | -1.5427 |
| C | -4.8076 | -4.2527 | -0.4086 | C | 5.7954  | -2.718  | 1.9778  |
| C | -3.7541 | -3.2257 | -0.0716 | C | 5.0393  | -1.4476 | 1.6598  |
| C | -3.7898 | -1.9525 | -0.535  | C | 4.7793  | -1.023  | 0.3981  |
| C | -4.8921 | -1.4656 | -1.4988 | C | 5.21    | -1.8523 | -0.8294 |
| C | -5.8559 | -2.5993 | -1.9474 | C | 5.6529  | -3.2913 | -0.4451 |
| C | -2.8553 | -0.8337 | -0.1007 | C | 4.0605  | 0.2729  | 0.0403  |
| C | -3.6525 | 0.2503  | 0.6466  | C | 2.8594  | 0.0444  | -0.9007 |
| C | -4.8271 | 0.7714  | -0.2022 | C | 3.3262  | -0.689  | -2.1678 |
| C | -5.6973 | -0.3674 | -0.7524 | C | 4.0223  | -2.0027 | -1.817  |
| C | -2.7567 | 1.3785  | 1.0839  | C | 2.133   | 1.3434  | -1.1739 |
| C | -2.456  | 1.6877  | 2.3438  | C | 1.8378  | 1.8857  | -2.3543 |
| O | -2.1838 | 2.1516  | 0.0771  | O | 1.6951  | 2.0268  | -0.0388 |
| C | -4.2888 | -0.8855 | -2.8017 | C | 6.3931  | -1.1454 | -1.5319 |
| C | -2.7119 | -3.7288 | 0.8764  | C | 4.6221  | -0.7017 | 2.8903  |
| O | -2.6653 | -4.8941 | 1.2573  | O | 4.8059  | -1.14   | 4.0213  |
| O | 5.3119  | -2.643  | -0.236  | O | -4.9279 | -3.2527 | -0.4046 |
| C | -6.1201 | -3.6199 | -0.8541 | C | 6.5396  | -3.3106 | 0.7884  |
| O | -0.4061 | -0.7036 | 2.4729  | O | -1.241  | -0.0192 | -3.046  |
| H | -0.1882 | -1.752  | 4.1957  | H | -0.0309 | -1.2085 | -4.1578 |
| H | -2.9097 | 4.3865  | -1.5323 | H | 2.408   | 3.9949  | 1.9662  |

|   |         |         |         |   |         |         |         |
|---|---------|---------|---------|---|---------|---------|---------|
| H | -2.8603 | 6.0244  | -0.9165 | H | 2.3531  | 5.708   | 1.6142  |
| H | -2.0196 | 5.3159  | 1.2318  | H | 1.5704  | 5.3483  | -0.6292 |
| H | -3.417  | 4.3328  | 0.8229  | H | 2.9528  | 4.2967  | -0.3571 |
| H | -0.4493 | 6.0671  | -0.8705 | H | -0.0618 | 5.74    | 1.5349  |
| H | -0.9642 | 5.5434  | -2.4614 | H | 0.4382  | 4.9827  | 3.0341  |
| H | 0.9222  | 1.9847  | 1.4877  | H | -1.3398 | 2.0745  | -1.4368 |
| H | 0.5074  | 1.3857  | -0.1105 | H | -0.8756 | 1.2332  | 0.0341  |
| H | 2.6911  | 3.4038  | 0.6473  | H | -3.1971 | 3.1738  | -0.4153 |
| H | 3.3971  | 3.5005  | -1.6766 | H | -3.8785 | 2.9869  | 1.8813  |
| H | 2.1713  | 2.3534  | -2.1737 | H | -2.6291 | 1.8252  | 2.2629  |
| H | 1.4487  | 4.6144  | -2.7253 | H | -1.9638 | 3.9888  | 3.1188  |
| H | 1.7627  | 5.1782  | -1.0987 | H | -2.2847 | 4.7748  | 1.5888  |
| H | -0.0602 | 1.9308  | -2.1725 | H | -0.4056 | 1.4466  | 2.1782  |
| H | -1.6385 | 2.7024  | -2.1813 | H | 1.1656  | 2.2202  | 2.2952  |
| H | -0.4078 | 3.2333  | -3.304  | H | -0.0616 | 2.5627  | 3.4945  |
| H | 0.398   | 4.3421  | 1.9668  | H | -0.899  | 4.4864  | -1.5323 |
| H | 4.9279  | 2.2769  | 1.3048  | H | -4.977  | 1.7411  | -1.697  |
| H | 2.8909  | -0.513  | -3.1026 | H | -3.68   | -0.9724 | 3.0545  |
| H | 4.3067  | -0.9309 | -4.0514 | H | -5.2092 | -1.6359 | 3.6041  |
| H | 5.7704  | -0.794  | -2.0795 | H | -6.1384 | -1.596  | 1.329   |
| H | 4.8641  | 0.6972  | -2.2936 | H | -5.5514 | -0.0058 | 1.7975  |
| H | 4.6107  | -3.0145 | -2.9024 | H | -4.9107 | -3.6675 | 2.3544  |
| H | 2.9567  | -2.932  | -3.4773 | H | -3.4927 | -3.4025 | 3.3506  |
| H | 3.6274  | -3.2927 | 1.4619  | H | -2.7799 | -3.5041 | -1.6387 |
| H | 3.9896  | -1.6677 | 1.921   | H | -3.2516 | -1.904  | -2.0775 |
| H | 1.7985  | -0.8709 | 1.2116  | H | -1.4161 | -0.9214 | -0.744  |
| H | 1.0253  | -3.7255 | 0.4565  | H | -0.5427 | -3.7068 | 0.0945  |
| H | 0.0654  | -2.2775 | 0.2641  | H | 0.1659  | -2.1681 | 0.5332  |
| H | 1.0513  | -3.0409 | -1.8641 | H | -1.2513 | -3.1194 | 2.3243  |
| H | 1.4677  | -1.3998 | -1.4594 | H | -1.7795 | -1.5359 | 1.8228  |
| H | 1.406   | -3.3517 | 4.5685  | H | 0.8337  | -3.2282 | -3.4523 |
| H | 2.7258  | -3.789  | 3.3732  | H | 0.3654  | -4.0421 | -1.8736 |
| H | 2.9794  | -4.692  | -0.1345 | H | -2.409  | -4.9277 | 0.0633  |
| H | 2.6496  | -4.8743 | -1.8558 | H | -2.4604 | -5.168  | 1.8099  |
| H | 4.3077  | -4.6865 | -1.2909 | H | -3.951  | -5.1843 | 0.8712  |
| H | -4.4206 | -4.9104 | -1.1968 | H | 6.5291  | -2.5387 | 2.7732  |
| H | -5.0279 | -4.8848 | 0.4601  | H | 5.0804  | -3.4578 | 2.3607  |
| H | -6.8076 | -2.177  | -2.2936 | H | 4.7733  | -3.9178 | -0.2419 |
| H | -5.4316 | -3.134  | -2.8088 | H | 6.1777  | -3.7673 | -1.2829 |
| H | -2.0513 | -1.1822 | 0.5453  | H | 3.7087  | 0.8033  | 0.9262  |
| H | -2.3418 | -0.4175 | -0.9753 | H | 4.7796  | 0.9547  | -0.4323 |
| H | -4.0828 | -0.2152 | 1.5459  | H | 2.1423  | -0.609  | -0.3826 |
| H | -5.4547 | 1.4365  | 0.4047  | H | 2.4694  | -0.9106 | -2.8147 |
| H | -4.4601 | 1.3818  | -1.0364 | H | 4.0019  | -0.0552 | -2.7548 |
| H | -6.2438 | -0.8139 | 0.0889  | H | 3.2675  | -2.6734 | -1.3835 |
| H | -6.457  | 0.0619  | -1.418  | H | 4.3625  | -2.4837 | -2.7431 |
| H | -2.7415 | 1.228   | 3.2695  | H | 2.0305  | 1.5614  | -3.3584 |

|             |                  |                  |                  |             |                  |                  |                  |
|-------------|------------------|------------------|------------------|-------------|------------------|------------------|------------------|
| H           | -5.0822          | -0.6008          | -3.5032          | H           | 6.7513           | -1.7341          | -2.3843          |
| H           | -3.6786          | 0.0072           | -2.6393          | H           | 6.1236           | -0.1574          | -1.9178          |
| H           | -3.6523          | -1.6253          | -3.3018          | H           | 7.2391           | -0.9996          | -0.8512          |
| H           | -1.9697          | -3.0069          | 1.2341           | H           | 4.1321           | 0.2691           | 2.7499           |
| H           | 5.8976           | -2.128           | 0.3587           | H           | -5.4213          | -2.7844          | -1.1117          |
| H           | -6.7955          | -4.3988          | -1.2261          | H           | 7.4645           | -2.7515          | 0.6064           |
| H           | -6.6214          | -3.1463          | -0.0016          | H           | 6.8381           | -4.3399          | 1.0189           |
| <b>5d-7</b> | <b>X axis(Å)</b> | <b>Y axis(Å)</b> | <b>Z axis(Å)</b> | <b>5d-8</b> | <b>X axis(Å)</b> | <b>Y axis(Å)</b> | <b>Z axis(Å)</b> |
| C           | -1.9473          | 4.8271           | -0.8039          | C           | -1.1979          | 5.4909           | -1.1373          |
| C           | -1.826           | 4.3018           | 0.6267           | C           | -1.5334          | 4.8711           | 0.2185           |
| C           | -0.9569          | 3.0376           | 0.7264           | C           | -0.917           | 3.473            | 0.3982           |
| C           | 0.4313           | 3.2461           | 0.0552           | C           | 0.6183           | 3.4901           | 0.1405           |
| C           | 0.2742           | 3.6926           | -1.4456          | C           | 0.938            | 4.0559           | -1.2952          |
| C           | -0.5908          | 4.9814           | -1.4992          | C           | 0.302            | 5.4662           | -1.4421          |
| C           | 1.361            | 2.0194           | 0.1545           | C           | 1.3312           | 2.1303           | 0.3608           |
| C           | 2.7453           | 2.2785           | -0.4773          | C           | 2.8585           | 2.2603           | 0.1598           |
| C           | 2.6415           | 2.8176           | -1.9127          | C           | 3.2115           | 2.8755           | -1.2046          |
| C           | 1.6816           | 4.0054           | -2.0254          | C           | 2.4761           | 4.192            | -1.4562          |
| C           | -0.3822          | 2.6271           | -2.3644          | C           | 0.4242           | 3.1642           | -2.4569          |
| C           | -0.8306          | 2.6257           | 2.1755           | C           | -1.2487          | 2.9562           | 1.777            |
| O           | -0.2098          | 3.2178           | 3.0468           | O           | -0.7853          | 3.3717           | 2.8307           |
| O           | 1.1041           | 4.332            | 0.7426           | O           | 1.2167           | 4.4158           | 1.0893           |
| C           | 3.6093           | 1.0423           | -0.4488          | C           | 3.6114           | 0.9646           | 0.3266           |
| O           | 3.0568           | -0.1285          | -0.9679          | O           | 3.1525           | -0.1513          | -0.3743          |
| C           | 4.8459           | 0.9747           | 0.0397           | C           | 4.7272           | 0.8241           | 1.0401           |
| C           | 3.4079           | -2.0086          | -3.2127          | C           | 4.0005           | -1.5883          | -2.8116          |
| C           | 4.5296           | -1.3459          | -2.4215          | C           | 4.9253           | -1.0584          | -1.7221          |
| C           | 4.1058           | -1.125           | -0.9643          | C           | 4.2326           | -1.1175          | -0.3533          |
| C           | 3.7112           | -2.4752          | -0.2646          | C           | 3.8058           | -2.5822          | 0.0094           |
| C           | 2.6252           | -3.2717          | -1.0819          | C           | 2.9367           | -3.2496          | -1.1212          |
| C           | 3.0043           | -3.3398          | -2.5899          | C           | 3.5743           | -3.0225          | -2.5227          |
| C           | 3.2572           | -2.3017          | 1.2076           | C           | 3.0941           | -2.7042          | 1.3806           |
| C           | 1.8474           | -1.7121          | 1.3914           | C           | 1.6343           | -2.2114          | 1.4142           |
| C           | 0.8111           | -2.4867          | 0.5604           | C           | 0.8212           | -2.8491          | 0.2773           |
| C           | 1.2266           | -2.6254          | -0.9075          | C           | 1.4915           | -2.695           | -1.0901          |
| C           | 1.5176           | -1.5846          | 2.8705           | C           | 0.9388           | -2.4258          | 2.7526           |
| C           | 2.1471           | -0.4408          | 3.5986           | C           | -0.2656          | -1.5913          | 3.0363           |
| C           | 0.705            | -2.3738          | 3.5917           | C           | 1.3067           | -3.2647          | 3.7357           |
| C           | 2.5319           | -4.7544          | -0.6134          | C           | 2.8615           | -4.7963          | -0.9503          |
| C           | 5.2085           | -0.4092          | -0.2148          | C           | 5.1382           | -0.5283          | 0.7064           |
| O           | 6.2689           | -0.9027          | 0.1447           | O           | 6.0964           | -1.0823          | 1.2276           |
| C           | -6.3659          | -2.2594          | -1.9022          | C           | -7.0415          | -2.4328          | -0.8128          |
| C           | -5.5277          | -1.0772          | -1.4701          | C           | -6.27            | -1.3536          | -0.0873          |
| C           | -4.9782          | -0.9553          | -0.236           | C           | -4.9233          | -1.2121          | -0.1627          |
| C           | -5.1407          | -2.0647          | 0.8245           | C           | -4.0691          | -2.1448          | -1.047           |
| C           | -5.6899          | -3.3857          | 0.2181           | C           | -4.9334          | -2.9895          | -2.024           |
| C           | -4.1664          | 0.2411           | 0.2473           | C           | -4.1043          | -0.1702          | 0.5912           |

|   |         |         |         |   |         |         |         |
|---|---------|---------|---------|---|---------|---------|---------|
| C | -2.7942 | -0.1679 | 0.819   | C | -3.1832 | 0.6532  | -0.3319 |
| C | -2.9822 | -1.1902 | 1.9497  | C | -2.2804 | -0.2773 | -1.1535 |
| C | -3.7667 | -2.4064 | 1.4613  | C | -3.0974 | -1.3116 | -1.9231 |
| C | -1.9967 | 1.0536  | 1.2174  | C | -2.3406 | 1.6842  | 0.3866  |
| C | -1.5451 | 1.3836  | 2.4257  | C | -2.2043 | 1.8652  | 1.6995  |
| O | -1.6741 | 1.9125  | 0.1678  | O | -1.6174 | 2.5366  | -0.4469 |
| C | -6.1217 | -1.5811 | 1.9187  | C | -3.2675 | -3.11   | -0.1421 |
| C | -5.3834 | -0.0478 | -2.5491 | C | -7.1509 | -0.4699 | 0.7404  |
| O | -5.8385 | -0.2057 | -3.6773 | O | -8.3727 | -0.5793 | 0.7542  |
| O | 4.8876  | -3.3215 | -0.2294 | O | 5.0113  | -3.3837 | 0.1096  |
| C | -6.833  | -3.1423 | -0.7525 | C | -6.1713 | -3.5599 | -1.3531 |
| O | 2.8852  | 0.3665  | 3.047   | O | -0.7192 | -0.7813 | 2.2372  |
| H | 1.9069  | -0.3588 | 4.6722  | H | -0.7389 | -1.7449 | 4.021   |
| H | -2.595  | 4.1607  | -1.3842 | H | -1.752  | 4.9702  | -1.9261 |
| H | -2.4544 | 5.7993  | -0.7875 | H | -1.5512 | 6.5288  | -1.1556 |
| H | -1.409  | 5.0951  | 1.2604  | H | -1.185  | 5.5431  | 1.0133  |
| H | -2.8361 | 4.1008  | 1.0063  | H | -2.6259 | 4.8214  | 0.3125  |
| H | -0.0528 | 5.8142  | -1.0278 | H | 0.8021  | 6.1742  | -0.7683 |
| H | -0.7565 | 5.282   | -2.5417 | H | 0.4659  | 5.8502  | -2.4571 |
| H | 1.5258  | 1.7708  | 1.2095  | H | 1.1639  | 1.7832  | 1.3885  |
| H | 0.8836  | 1.1447  | -0.301  | H | 0.9142  | 1.3611  | -0.2988 |
| H | 3.2435  | 3.052   | 0.1245  | H | 3.231   | 2.9514  | 0.9298  |
| H | 3.6339  | 3.1339  | -2.2595 | H | 4.2917  | 3.0648  | -1.2583 |
| H | 2.3257  | 2.0224  | -2.5993 | H | 2.9914  | 2.1664  | -2.0123 |
| H | 1.6013  | 4.3003  | -3.0795 | H | 2.7234  | 4.5527  | -2.463  |
| H | 2.1244  | 4.8664  | -1.5083 | H | 2.8663  | 4.95    | -0.7647 |
| H | 0.1137  | 1.6547  | -2.3062 | H | 0.7486  | 2.1243  | -2.3664 |
| H | -1.4385 | 2.4602  | -2.1453 | H | -0.664  | 3.154   | -2.5432 |
| H | -0.3375 | 2.9473  | -3.4127 | H | 0.7998  | 3.5346  | -3.4186 |
| H | 1.1501  | 4.1143  | 1.6976  | H | 0.9144  | 4.1701  | 1.9896  |
| H | 5.4609  | 1.7222  | 0.5021  | H | 5.2739  | 1.5273  | 1.6385  |
| H | 2.5408  | -1.3415 | -3.2762 | H | 3.1199  | -0.9436 | -2.9112 |
| H | 3.7434  | -2.1784 | -4.2425 | H | 4.5205  | -1.5531 | -3.7761 |
| H | 5.4372  | -1.9602 | -2.4728 | H | 5.8593  | -1.6337 | -1.7099 |
| H | 4.7715  | -0.3894 | -2.9025 | H | 5.1987  | -0.0261 | -1.9758 |
| H | 3.8458  | -4.0338 | -2.7223 | H | 4.4658  | -3.6567 | -2.6233 |
| H | 2.1716  | -3.7634 | -3.1663 | H | 2.8809  | -3.3519 | -3.3073 |
| H | 3.3064  | -3.2765 | 1.7133  | H | 3.1355  | -3.7591 | 1.6819  |
| H | 3.9973  | -1.6987 | 1.7482  | H | 3.6751  | -2.1858 | 2.1542  |
| H | 1.8342  | -0.6946 | 0.9964  | H | 1.6553  | -1.1286 | 1.251   |
| H | 0.6407  | -3.4849 | 0.9777  | H | 0.6437  | -3.9107 | 0.489   |
| H | -0.1546 | -1.9697 | 0.6041  | H | -0.1716 | -2.3934 | 0.2228  |
| H | 0.4698  | -3.2282 | -1.4266 | H | 0.8764  | -3.2121 | -1.8383 |
| H | 1.1855  | -1.6394 | -1.3807 | H | 1.4692  | -1.6385 | -1.3761 |
| H | 0.5199  | -2.2088 | 4.6496  | H | 0.7595  | -3.3465 | 4.671   |
| H | 0.2029  | -3.2311 | 3.1556  | H | 2.1716  | -3.9142 | 3.6481  |
| H | 2.3247  | -4.8495 | 0.4556  | H | 2.4748  | -5.0979 | 0.0265  |

|             |                  |                  |                  |              |                  |                  |                  |
|-------------|------------------|------------------|------------------|--------------|------------------|------------------|------------------|
| H           | 1.7326           | -5.2807          | -1.1487          | H            | 2.2066           | -5.2388          | -1.7104          |
| H           | 3.4611           | -5.3011          | -0.8099          | H            | 3.8452           | -5.2655          | -1.0646          |
| H           | -7.2573          | -1.9199          | -2.4439          | H            | -7.7909          | -2.8812          | -0.149           |
| H           | -5.7745          | -2.863           | -2.6028          | H            | -7.5864          | -1.967           | -1.6441          |
| H           | -4.8926          | -3.9161          | -0.3208          | H            | -5.2602          | -2.3724          | -2.8723          |
| H           | -6.0216          | -4.0639          | 1.0143           | H            | -4.3387          | -3.8056          | -2.4534          |
| H           | -4.0038          | 0.9752           | -0.5433          | H            | -4.7328          | 0.5306           | 1.1436           |
| H           | -4.7464          | 0.7717           | 1.0138           | H            | -3.5107          | -0.6914          | 1.3529           |
| H           | -2.227           | -0.6629          | 0.0171           | H            | -3.8294          | 1.205            | -1.0303          |
| H           | -2.0064          | -1.5282          | 2.3177           | H            | -1.6892          | 0.3025           | -1.8739          |
| H           | -3.4971          | -0.7353          | 2.8044           | H            | -1.5585          | -0.7772          | -0.5005          |
| H           | -3.1407          | -2.9326          | 0.727            | H            | -3.6672          | -0.775           | -2.6946          |
| H           | -3.9039          | -3.1017          | 2.2994           | H            | -2.4103          | -1.9786          | -2.4599          |
| H           | -1.6341          | 0.8966           | 3.3773           | H            | -2.618           | 1.3371           | 2.5363           |
| H           | -6.2936          | -2.365           | 2.6654           | H            | -2.6656          | -3.8023          | -0.7421          |
| H           | -5.7512          | -0.7034          | 2.4573           | H            | -2.5791          | -2.5841          | 0.5257           |
| H           | -7.0948          | -1.3063          | 1.4972           | H            | -3.9269          | -3.71            | 0.4944           |
| H           | -4.8434          | 0.873            | -2.2984          | H            | -6.6618          | 0.2997           | 1.3493           |
| H           | 5.6221           | -2.8153          | 0.1791           | H            | 5.6228           | -2.9486          | 0.7414           |
| H           | -7.6808          | -2.6746          | -0.2391          | H            | -5.8903          | -4.2406          | -0.5414          |
| H           | -7.1975          | -4.0972          | -1.1487          | H            | -6.7466          | -4.1542          | -2.0725          |
| <b>5d-9</b> | <b>X axis(Å)</b> | <b>Y axis(Å)</b> | <b>Z axis(Å)</b> | <b>5d-10</b> | <b>X axis(Å)</b> | <b>Y axis(Å)</b> | <b>Z axis(Å)</b> |
| C           | -2.4348          | 4.527            | -1.8018          | C            | -1.2271          | 5.3217           | -1.4705          |
| C           | -2.4747          | 4.4097           | -0.2774          | C            | -1.6189          | 4.8239           | -0.0799          |
| C           | -1.5871          | 3.2692           | 0.2477           | C            | -0.9919          | 3.4603           | 0.2593           |
| C           | -0.1317          | 3.3961           | -0.2892          | C            | 0.5527           | 3.4819           | 0.0679           |
| C           | -0.1004          | 3.4327           | -1.8608          | C            | 0.9359           | 3.9224           | -1.3948          |
| C           | -1.008           | 4.5925           | -2.3566          | C            | 0.2864           | 5.3006           | -1.6994          |
| C           | 0.8366           | 2.3178           | 0.2425           | C            | 1.2671           | 2.159            | 0.4377           |
| C           | 2.2796           | 2.5566           | -0.2459          | C            | 2.7992           | 2.2889           | 0.3019           |
| C           | 2.3586           | 2.6815           | -1.7767          | C            | 3.2221           | 2.7986           | -1.086           |
| C           | 1.3583           | 3.7023           | -2.33            | C            | 2.4794           | 4.0734           | -1.4901          |
| C           | -0.5751          | 2.1183           | -2.535           | C            | 0.4939           | 2.9199           | -2.4937          |
| C           | -1.6131          | 3.2524           | 1.7595           | C            | -1.3777          | 3.072            | 1.6666           |
| O           | -1.1179          | 4.0933           | 2.4971           | O            | -0.9811          | 3.6054           | 2.694            |
| O           | 0.3945           | 4.6751           | 0.1597           | O            | 1.0943           | 4.498            | 0.9562           |
| C           | 3.2163           | 1.5051           | 0.2935           | C            | 3.5231           | 1.0079           | 0.6293           |
| O           | 3.354            | 0.3243           | -0.4361          | O            | 3.3505           | -0.0702          | -0.2407          |
| C           | 3.9336           | 1.6239           | 1.4095           | C            | 4.3616           | 0.8425           | 1.6505           |
| C           | 5.4962           | -0.9612          | -2.0703          | C            | 5.0286           | -1.3288          | -2.3442          |
| C           | 5.6829           | -0.2292          | -0.7485          | C            | 5.5065           | -0.8581          | -0.9764          |
| C           | 4.4554           | -0.4037          | 0.1582           | C            | 4.3976           | -1.0197          | 0.0745           |
| C           | 4.1437           | -1.9156          | 0.4365           | C            | 3.9163           | -2.5077          | 0.1795           |
| C           | 4.0415           | -2.7535          | -0.8936          | C            | 3.5018           | -3.0994          | -1.2205          |
| C           | 5.235            | -2.4441          | -1.8417          | C            | 4.5785           | -2.7836          | -2.2983          |
| C           | 2.8826           | -2.1353          | 1.3124           | C            | 2.7838           | -2.723           | 1.2139           |
| C           | 1.5332           | -1.9425          | 0.5943           | C            | 1.3834           | -2.2694          | 0.7641           |



|   |          |         |         |   |         |         |         |
|---|----------|---------|---------|---|---------|---------|---------|
| C | 1.4828   | -2.7203 | -0.7317 | C | 1.0218  | -2.7947 | -0.634  |
| C | 2.703    | -2.4642 | -1.6164 | C | 2.1255  | -2.542  | -1.6622 |
| C | 0.3907   | -2.2573 | 1.5496  | C | 0.3404  | -2.6592 | 1.7989  |
| C | 8.00E-04 | -1.1938 | 2.52    | C | -0.369  | -1.5778 | 2.5365  |
| C | -0.3254  | -3.3921 | 1.6091  | C | 0.0028  | -3.9204 | 2.1184  |
| C | 4.1228   | -4.2828 | -0.6119 | C | 3.4031  | -4.653  | -1.177  |
| C | 4.6779   | 0.3771  | 1.4351  | C | 4.8863  | -0.4898 | 1.4052  |
| O | 5.3858   | 0.0383  | 2.3737  | O | 5.6286  | -1.0712 | 2.1847  |
| C | -4.5617  | -4.274  | -0.8881 | C | -7.1271 | -2.4539 | -0.712  |
| C | -3.7106  | -3.0293 | -0.8163 | C | -6.3659 | -1.331  | -0.0435 |
| C | -4.1623  | -1.8211 | -0.4002 | C | -5.0133 | -1.2287 | -0.0525 |
| C | -5.6371  | -1.6219 | 0.0028  | C | -4.1394 | -2.2603 | -0.7978 |
| C | -6.3717  | -2.9717 | 0.2357  | C | -4.9721 | -3.1645 | -1.7481 |
| C | -3.3066  | -0.5612 | -0.3044 | C | -4.2098 | -0.1376 | 0.6471  |
| C | -3.4474  | 0.1682  | 1.0493  | C | -3.2152 | 0.569   | -0.2959 |
| C | -4.923   | 0.4614  | 1.3488  | C | -2.2881 | -0.4609 | -0.9533 |
| C | -5.7454  | -0.8235 | 1.3265  | C | -3.0878 | -1.5386 | -1.6809 |
| C | -2.6416  | 1.4438  | 1.1249  | C | -2.3944 | 1.6561  | 0.3602  |
| C | -2.3148  | 2.0783  | 2.2497  | C | -2.3084 | 1.9557  | 1.6555  |
| O | -2.2095  | 2.0042  | -0.0739 | O | -1.6434 | 2.4349  | -0.5204 |
| C | -6.3602  | -0.8543 | -1.1298 | C | -3.4252 | -3.1618 | 0.2364  |
| C | -2.3155  | -3.2461 | -1.3026 | C | -7.2674 | -0.353  | 0.645   |
| O | -1.8195  | -4.3623 | -1.4105 | O | -8.4903 | -0.4374 | 0.6023  |
| O | 5.2588   | -2.4738 | 1.1756  | O | 5.0373  | -3.3073 | 0.6348  |
| C | -6.0587  | -3.9979 | -0.8411 | C | -6.2616 | -3.6442 | -1.1039 |
| O | 0.4947   | -0.073  | 2.5165  | O | -0.2152 | -0.3878 | 2.2928  |
| H | -0.7815  | -1.4684 | 3.2478  | H | -1.0678 | -1.9108 | 3.3227  |
| H | -2.9735  | 3.6836  | -2.2479 | H | -1.7328 | 4.7184  | -2.2324 |
| H | -2.9799  | 5.4282  | -2.1069 | H | -1.596  | 6.3458  | -1.6028 |
| H | -2.1627  | 5.3659  | 0.1618  | H | -1.3189 | 5.5735  | 0.6636  |
| H | -3.5172  | 4.2539  | 0.029   | H | -2.7139 | 4.7627  | -0.0328 |
| H | -0.5712  | 5.5582  | -2.0704 | H | 0.7412  | 6.0762  | -1.0694 |
| H | -1.0512  | 4.5955  | -3.4532 | H | 0.4944  | 5.5951  | -2.736  |
| H | 0.8545   | 2.3514  | 1.3391  | H | 1.0542  | 1.906   | 1.4838  |
| H | 0.4936   | 1.3154  | -0.035  | H | 0.8908  | 1.3271  | -0.1681 |
| H | 2.6142   | 3.5207  | 0.1639  | H | 3.1296  | 3.0438  | 1.0301  |
| H | 3.3724   | 2.9827  | -2.0702 | H | 4.3007  | 3.0033  | -1.091  |
| H | 2.1828   | 1.7096  | -2.2533 | H | 3.0608  | 2.025   | -1.8466 |
| H | 1.4116   | 3.6959  | -3.4263 | H | 2.7723  | 4.3487  | -2.5114 |
| H | 1.6771   | 4.7066  | -2.0225 | H | 2.822   | 4.8969  | -0.8503 |
| H | -0.0398  | 1.2379  | -2.1697 | H | 0.8394  | 1.901   | -2.3002 |
| H | -1.6407  | 1.9252  | -2.3975 | H | -0.5891 | 2.8717  | -2.6215 |
| H | -0.4123  | 2.1646  | -3.6188 | H | 0.9015  | 3.2164  | -3.468  |
| H | 0.2868   | 4.7288  | 1.1333  | H | 0.7646  | 4.3196  | 1.8628  |
| H | 3.9846   | 2.4149  | 2.1323  | H | 4.6589  | 1.5126  | 2.4339  |
| H | 4.6764   | -0.512  | -2.6419 | H | 4.2145  | -0.6895 | -2.7039 |
| H | 6.3995   | -0.843  | -2.6803 | H | 5.8456  | -1.2259 | -3.068  |

|   |         |         |         |   |         |         |         |
|---|---------|---------|---------|---|---------|---------|---------|
| H | 6.5871  | -0.5957 | -0.246  | H | 6.4027  | -1.4179 | -0.681  |
| H | 5.8561  | 0.8325  | -0.9666 | H | 5.8107  | 0.193   | -1.0629 |
| H | 6.1531  | -2.8842 | -1.4288 | H | 5.4692  | -3.4002 | -2.1153 |
| H | 5.0781  | -2.9307 | -2.8131 | H | 4.211   | -3.0732 | -3.2913 |
| H | 2.9209  | -3.1485 | 1.7374  | H | 2.7612  | -3.7888 | 1.48    |
| H | 2.9327  | -1.4854 | 2.1956  | H | 3.04    | -2.2291 | 2.1604  |
| H | 1.426   | -0.8889 | 0.32    | H | 1.3979  | -1.1782 | 0.6895  |
| H | 1.3976  | -3.7977 | -0.5566 | H | 0.7951  | -3.8667 | -0.6046 |
| H | 0.5851  | -2.4302 | -1.289  | H | 0.1026  | -2.3103 | -0.9826 |
| H | 2.6198  | -3.0926 | -2.5129 | H | 1.825   | -3.0005 | -2.6135 |
| H | 2.6632  | -1.4333 | -1.9812 | H | 2.1802  | -1.4677 | -1.8634 |
| H | -1.1347 | -3.5418 | 2.3179  | H | -0.7464 | -4.1582 | 2.868   |
| H | -0.1293 | -4.2324 | 0.9488  | H | 0.4785  | -4.7687 | 1.6336  |
| H | 3.3657  | -4.6241 | 0.0989  | H | 2.7124  | -5.0127 | -0.4099 |
| H | 3.9841  | -4.8556 | -1.5366 | H | 3.0554  | -5.0467 | -2.1395 |
| H | 5.0986  | -4.5681 | -0.2029 | H | 4.3758  | -5.1157 | -0.9755 |
| H | -4.3519 | -4.8303 | -1.81   | H | -7.9219 | -2.8242 | -0.0529 |
| H | -4.2873 | -4.9277 | -0.0501 | H | -7.6152 | -2.0521 | -1.6093 |
| H | -6.0805 | -3.3975 | 1.2059  | H | -5.2326 | -2.6149 | -2.6632 |
| H | -7.4563 | -2.8126 | 0.286   | H | -4.3788 | -4.0292 | -2.0713 |
| H | -2.2433 | -0.7744 | -0.4435 | H | -4.8481 | 0.6277  | 1.092   |
| H | -3.5949 | 0.1044  | -1.1282 | H | -3.6736 | -0.5962 | 1.488   |
| H | -3.0685 | -0.5092 | 1.8286  | H | -3.8048 | 1.0542  | -1.0877 |
| H | -5.0257 | 0.9215  | 2.3399  | H | -1.6236 | 0.0277  | -1.6773 |
| H | -5.3264 | 1.1859  | 0.6309  | H | -1.6382 | -0.9179 | -0.1997 |
| H | -5.4089 | -1.4503 | 2.164   | H | -3.5896 | -1.0603 | -2.5336 |
| H | -6.7953 | -0.5777 | 1.5321  | H | -2.391  | -2.2709 | -2.1088 |
| H | -2.5172 | 1.8453  | 3.2771  | H | -2.7553 | 1.5117  | 2.5231  |
| H | -7.4228 | -0.7199 | -0.8964 | H | -2.8159 | -3.9249 | -0.2616 |
| H | -5.9387 | 0.1423  | -1.2953 | H | -2.757  | -2.5962 | 0.8913  |
| H | -6.2963 | -1.3858 | -2.0855 | H | -4.1397 | -3.6794 | 0.8857  |
| H | -1.7432 | -2.3494 | -1.5748 | H | -6.7924 | 0.4631  | 1.2023  |
| H | 5.4197  | -1.914  | 1.965   | H | 5.3852  | -2.9111 | 1.4623  |
| H | -6.4069 | -3.6468 | -1.8191 | H | -6.0463 | -4.2591 | -0.2226 |
| H | -6.5969 | -4.9307 | -0.6363 | H | -6.8134 | -4.2841 | -1.8022 |

**Table S12** DP4+ results obtained for compounds **1– 5**

| Exp<br>NMR<br>from | Cal<br>NMR<br>from | sDP4+    | sDP4+    | sDP4+      | uDP4+    | uDP4+    | uDP4+      | DP4+     | DP4+     | DP4+       |
|--------------------|--------------------|----------|----------|------------|----------|----------|------------|----------|----------|------------|
|                    |                    | (H data) | (C data) | (all data) | (H data) | (C data) | (all data) | (H data) | (C data) | (all data) |
| 1                  | 1a&1b&<br>1c&1d    | 100.00%  | 91.39%   | 100.00%    | 100.00%  | 53.02%   | 100.00%    | 100.00%  | 92.50%   | 100.00%    |
| 2                  | 2c&2d&<br>2c&2d    | 100.00%  | 90.64%   | 100.00%    | 100.00%  | 67.02%   | 100.00%    | 100.00%  | 95.16%   | 100.00%    |
| 3                  | 3c&3d&<br>3c&3d    | 100.00%  | 87.82%   | 100.00%    | 100.00%  | 61.03%   | 100.00%    | 100.00%  | 97.44%   | 100.00%    |
| 4                  | 4c&4d&<br>4c&4d    | 100.00%  | 72.22%   | 100.00%    | 100.00%  | 93.48%   | 100.00%    | 100.00%  | 98.84%   | 100.00%    |
| 5                  | 5c&5d&             | 100.00%  | 68.40%   | 100.00%    | 100.00%  | 25.41%   | 100.00%    | 100.00%  | 63.89%   | 100.00%    |

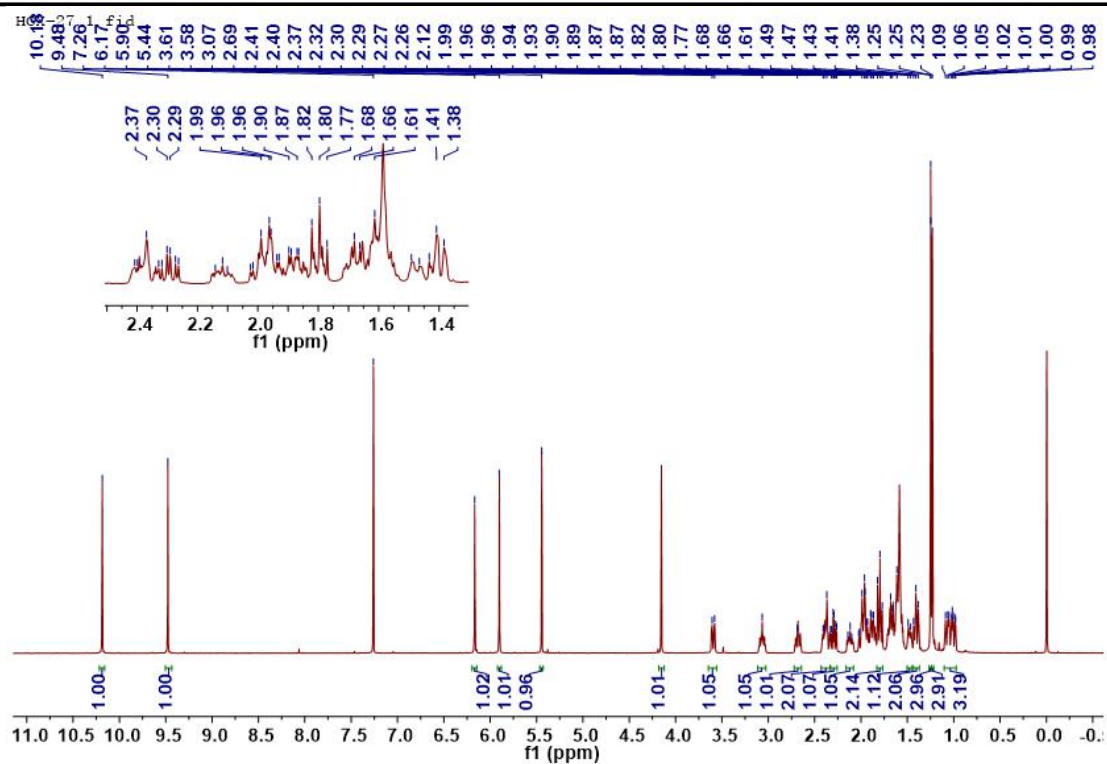Figure S31. <sup>1</sup>H NMR (600 MHz) spectrum of **1** in CDCl<sub>3</sub>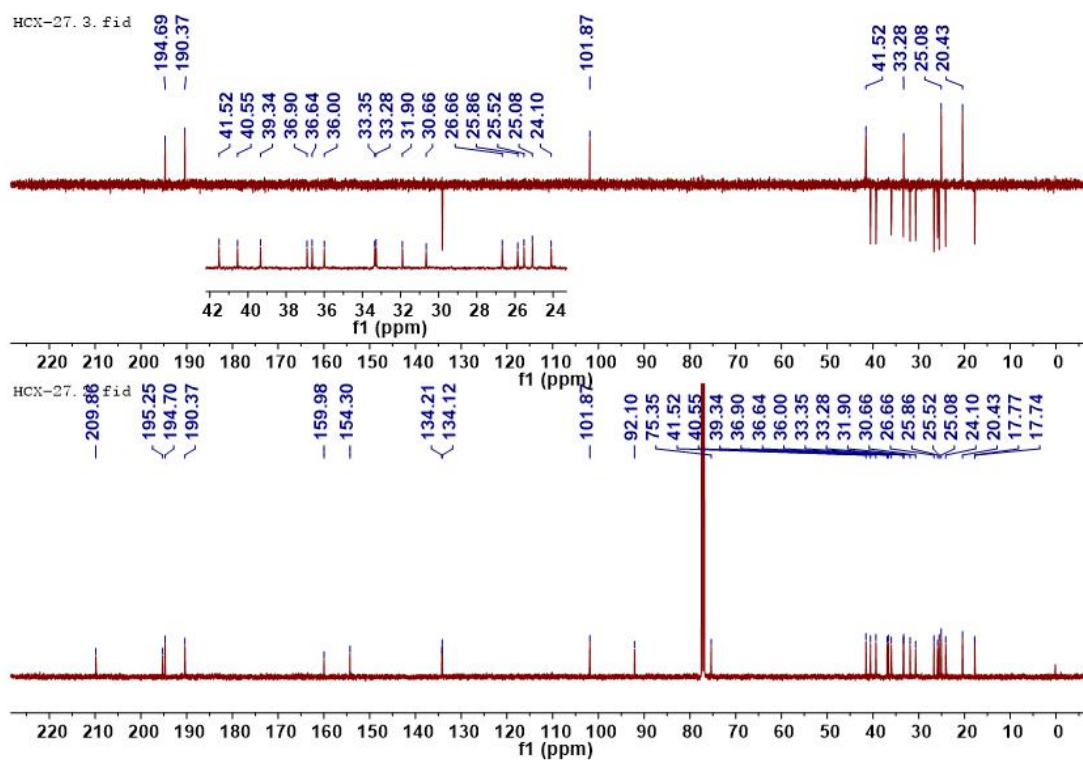Figure S32. <sup>13</sup>C NMR and DEPT (150 MHz) spectra of **1** in CDCl<sub>3</sub>

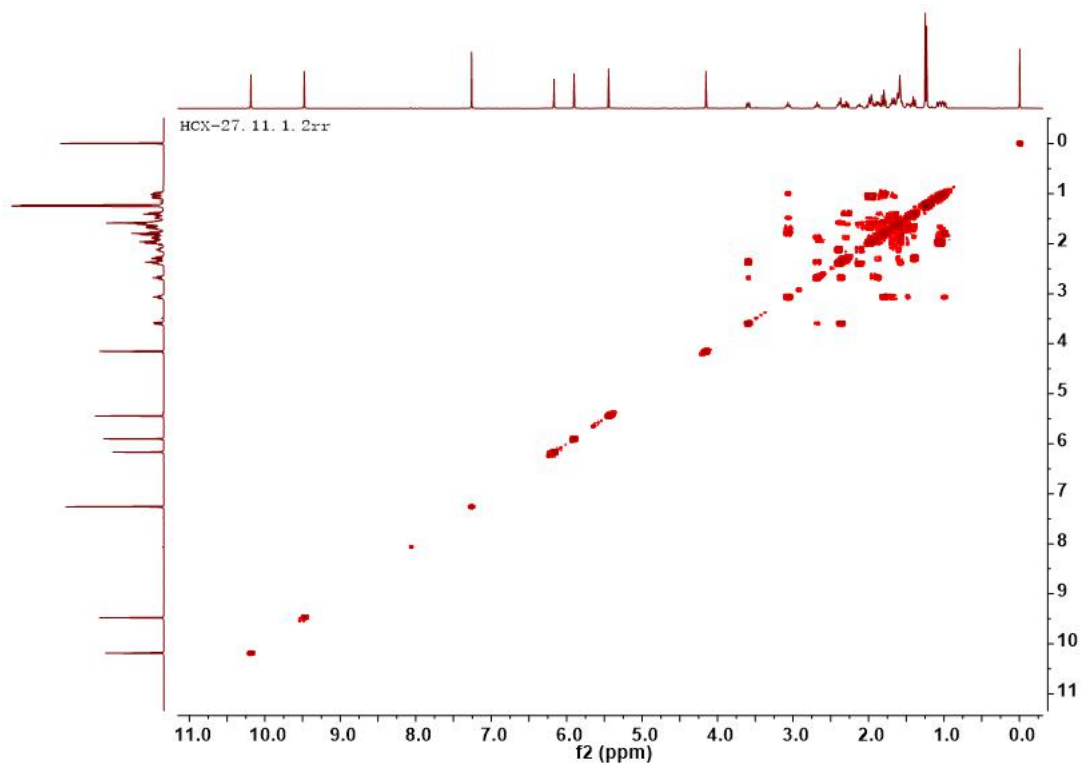

Figure S33. HSQC (600 MHz) spectrum of **1** in CDCl<sub>3</sub>

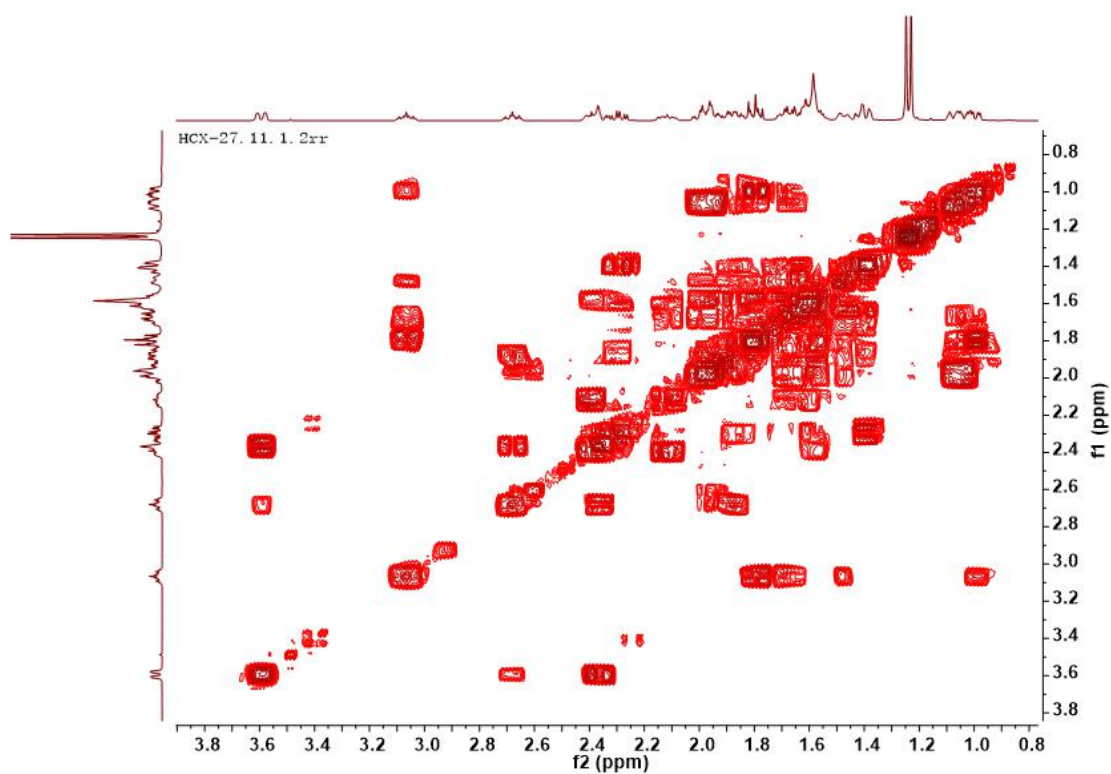

Figure S34. Enlarged <sup>1</sup>H-<sup>1</sup>H COSY (600 MHz) spectrum of **1** in CDCl<sub>3</sub>

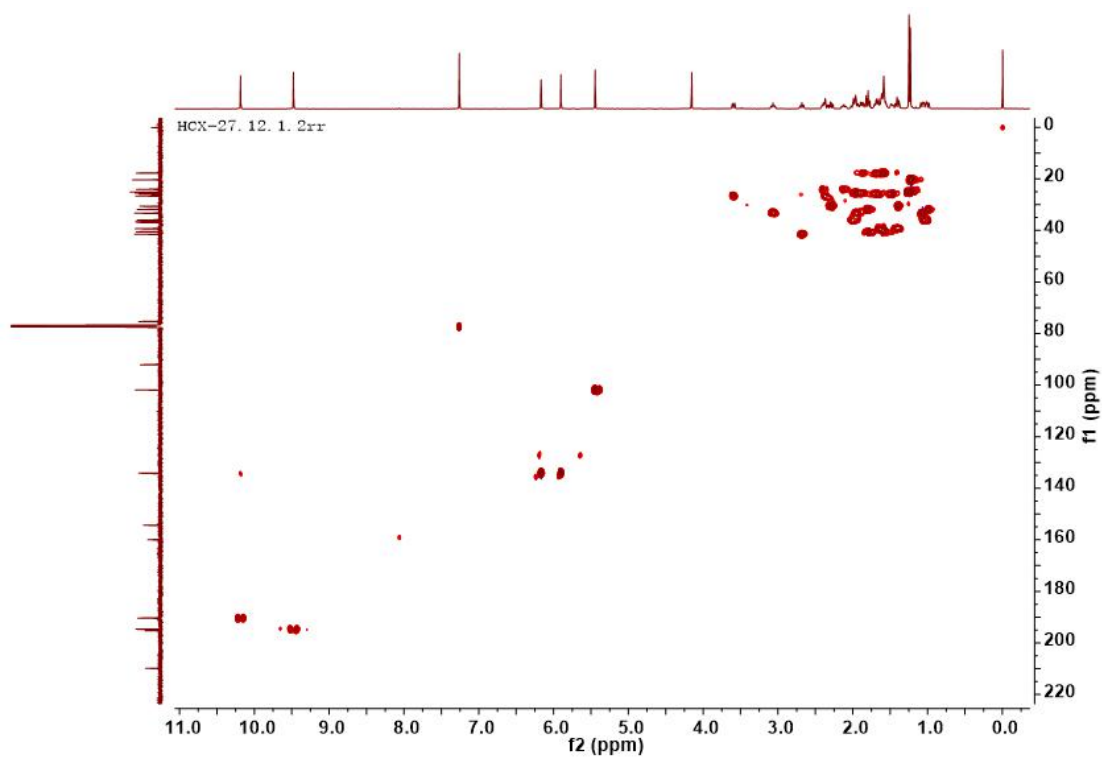

**Figure S35.** HSQC (600 MHz) spectrum of **1** in CDCl<sub>3</sub>

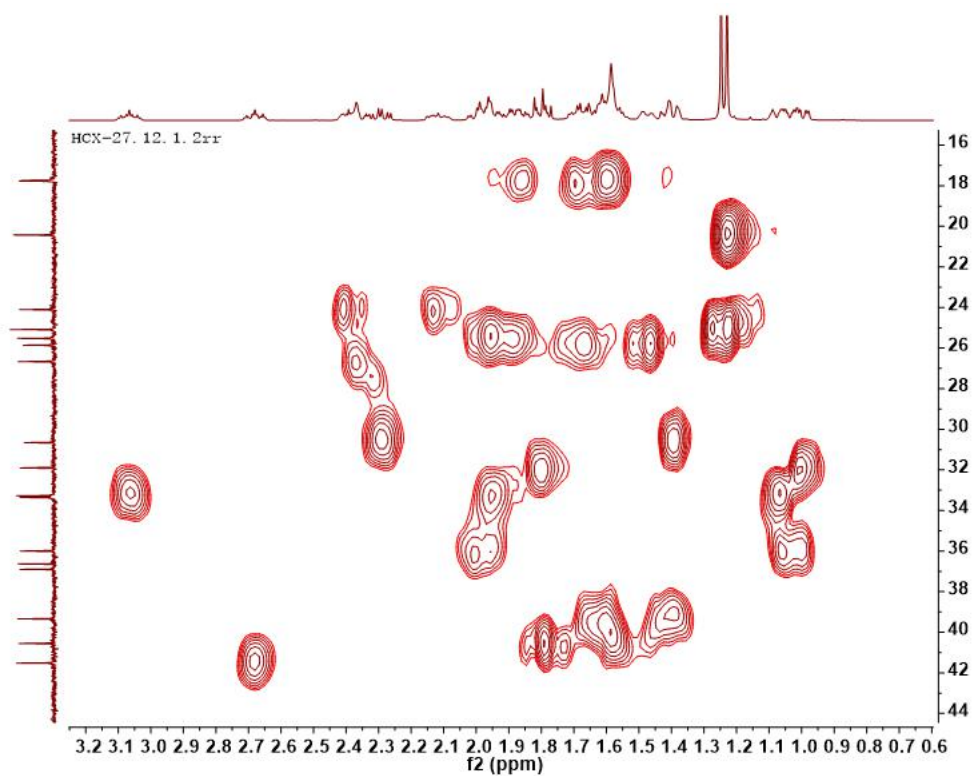

**Figure S36.** Enlarged HSQC (600 MHz) spectrum of **1** in CDCl<sub>3</sub>

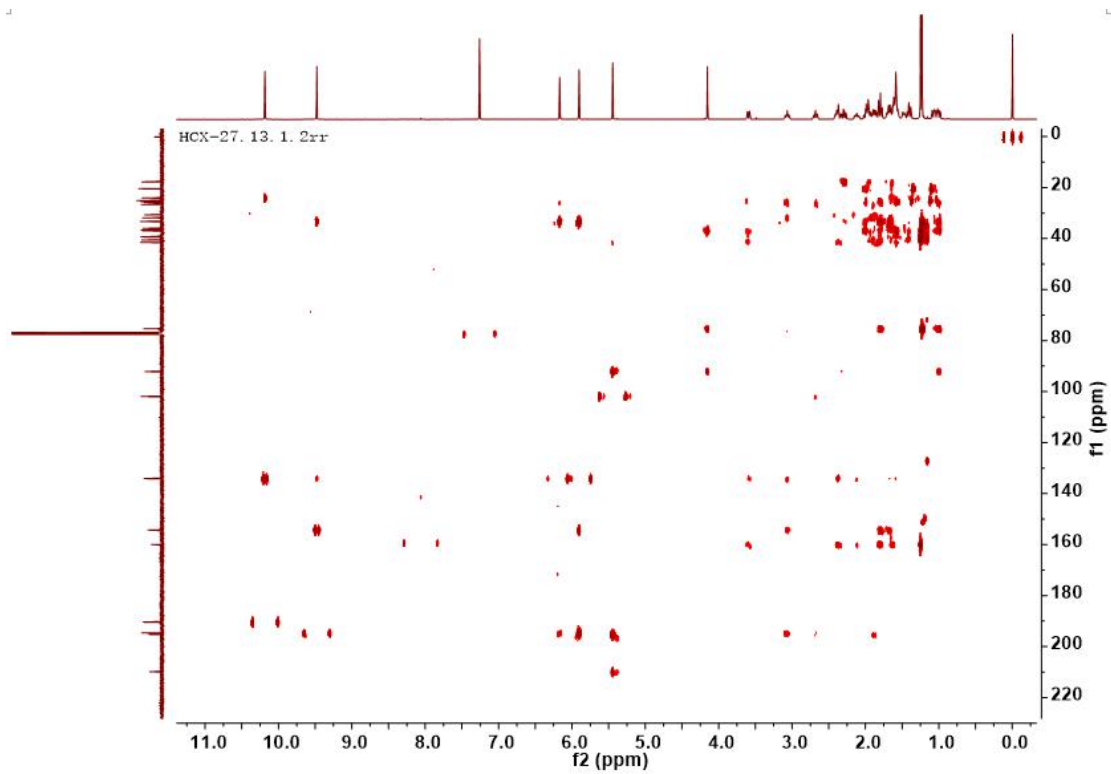

**Figure S37.** HMBC (600 MHz) spectrum of **1** in CDCl<sub>3</sub>

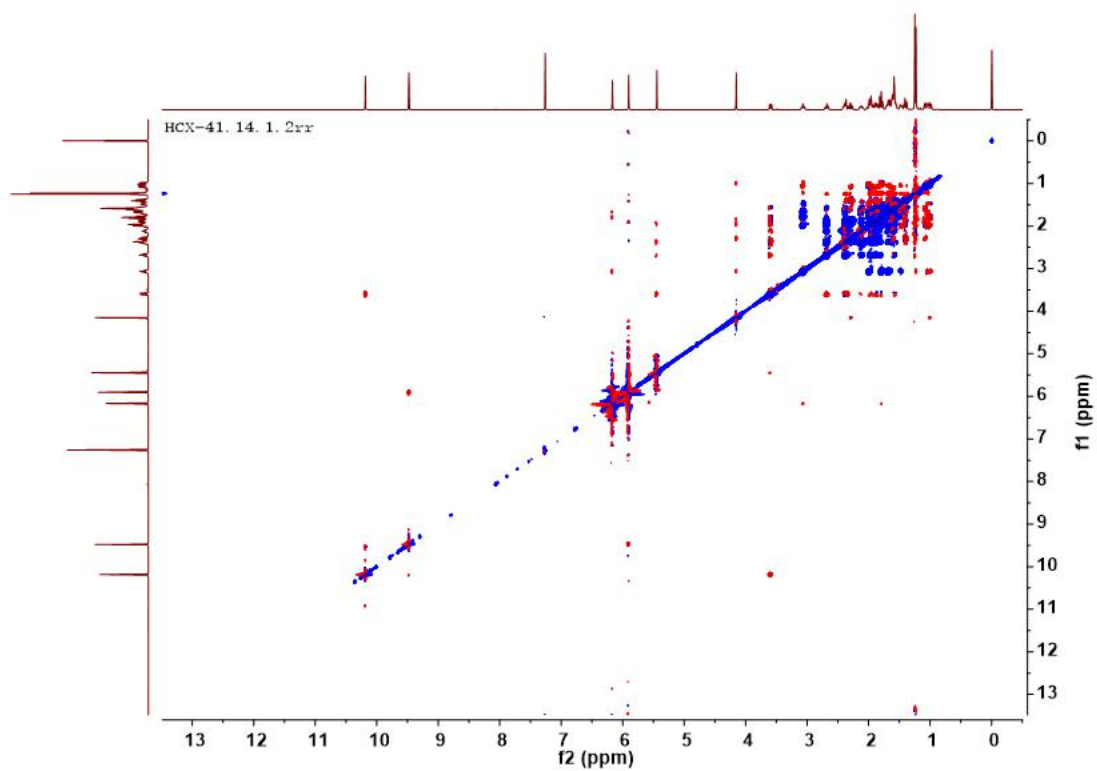

**Figure S38.** ROESY (600 MHz) spectrum of **1** in CDCl<sub>3</sub>

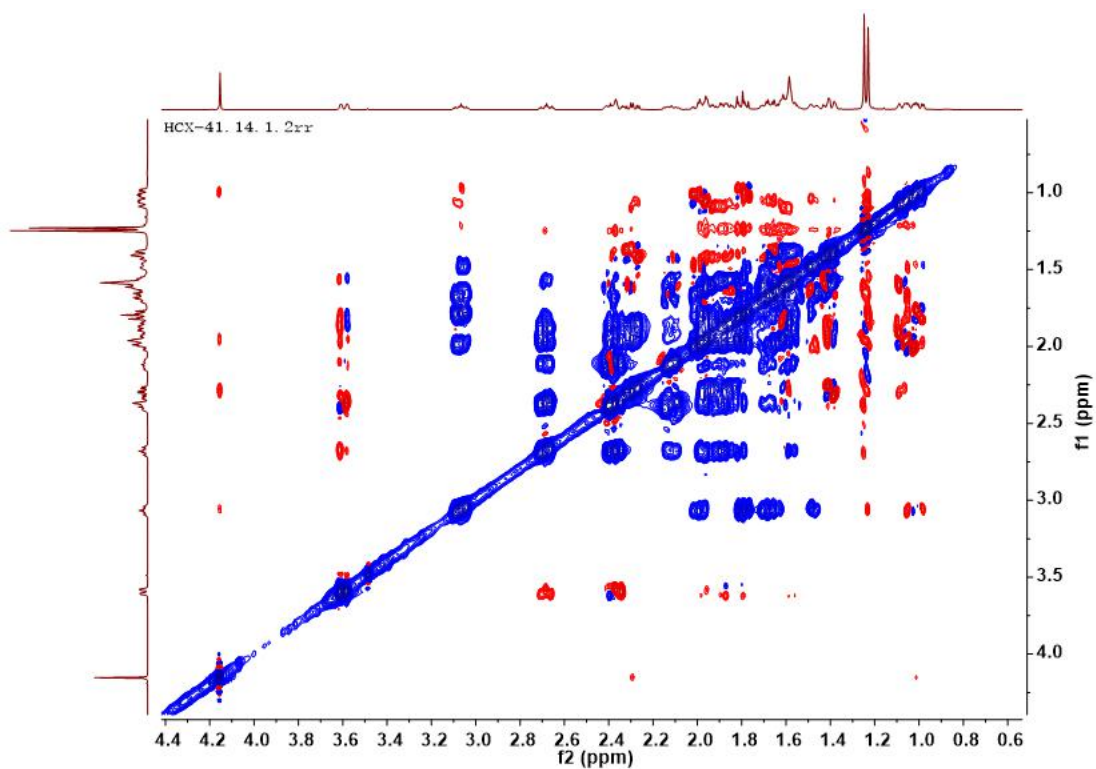

Figure S39. Enlarged ROESY (600 MHz) spectrum of **1** in CDCl<sub>3</sub>

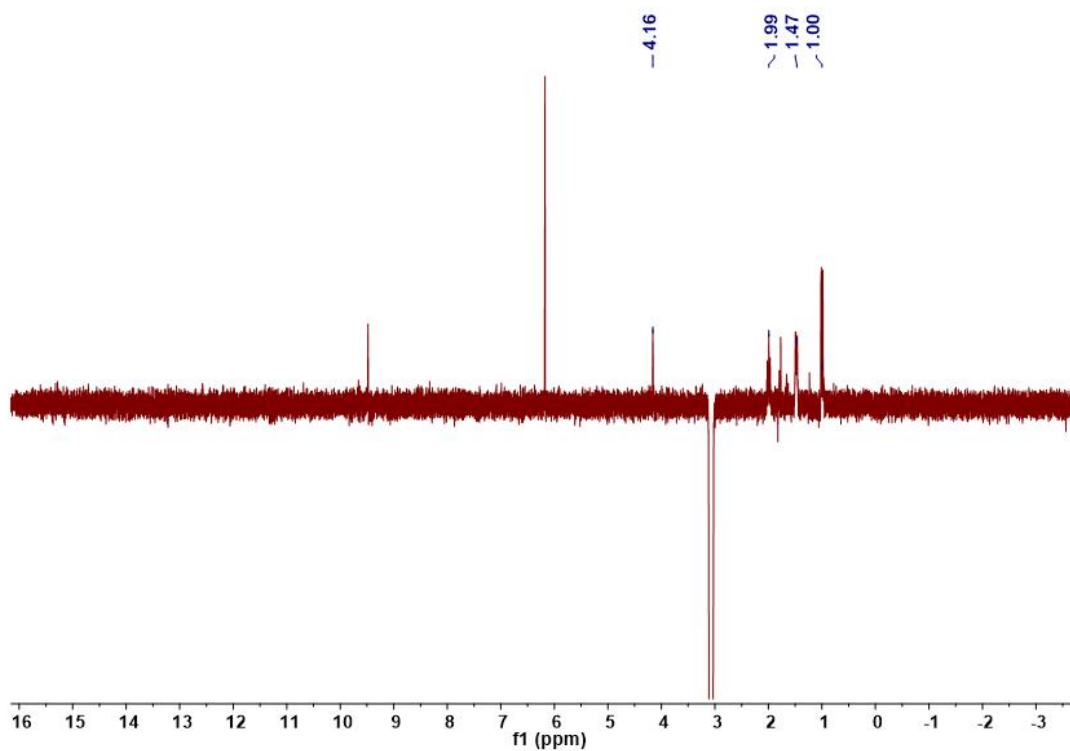

Figure S40. NOE irradiation spectrum (freq: 3.06 ppm) of compound **1** in CDCl<sub>3</sub>

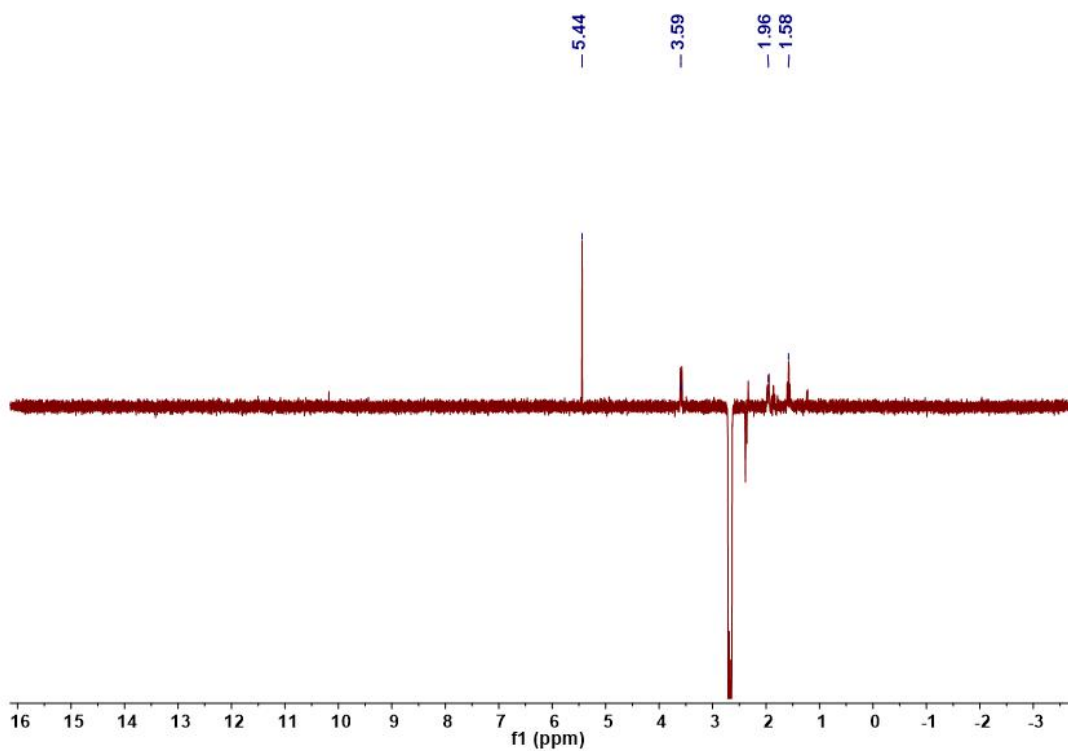

**Figure S41.** NOE irradiation spectrum (freq: 2.68 ppm) of compound **1** in CDCl<sub>3</sub>

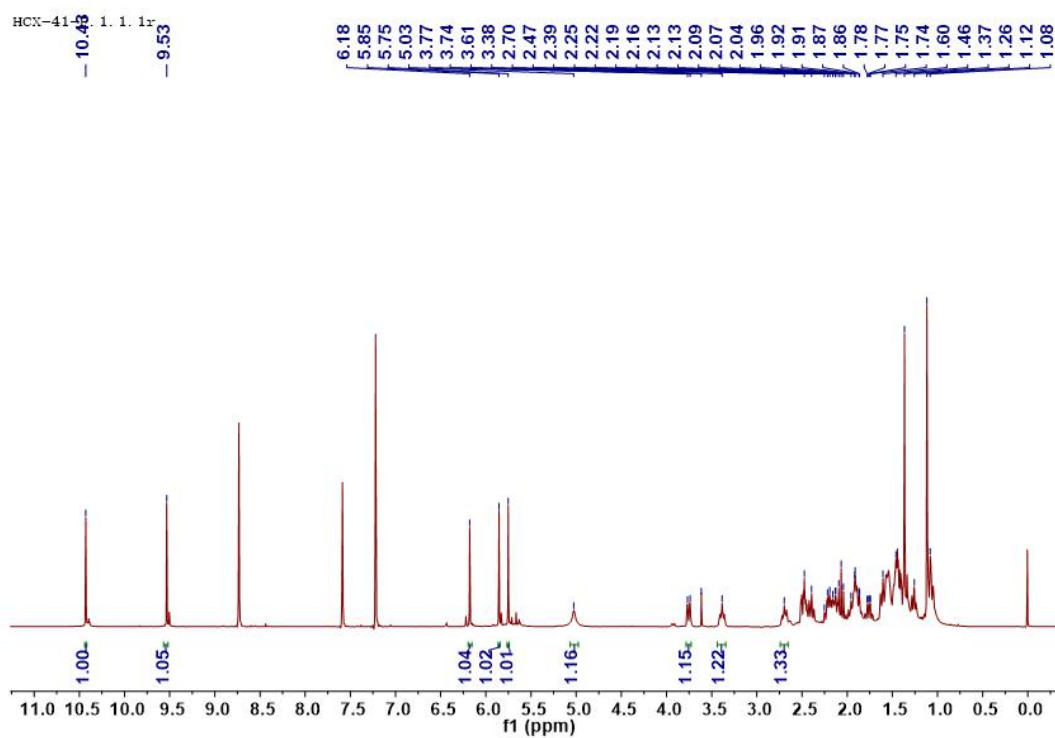

**Figure S42.** <sup>1</sup>H NMR (600 MHz) spectrum of **1** in Pyridine-*d*<sub>3</sub>



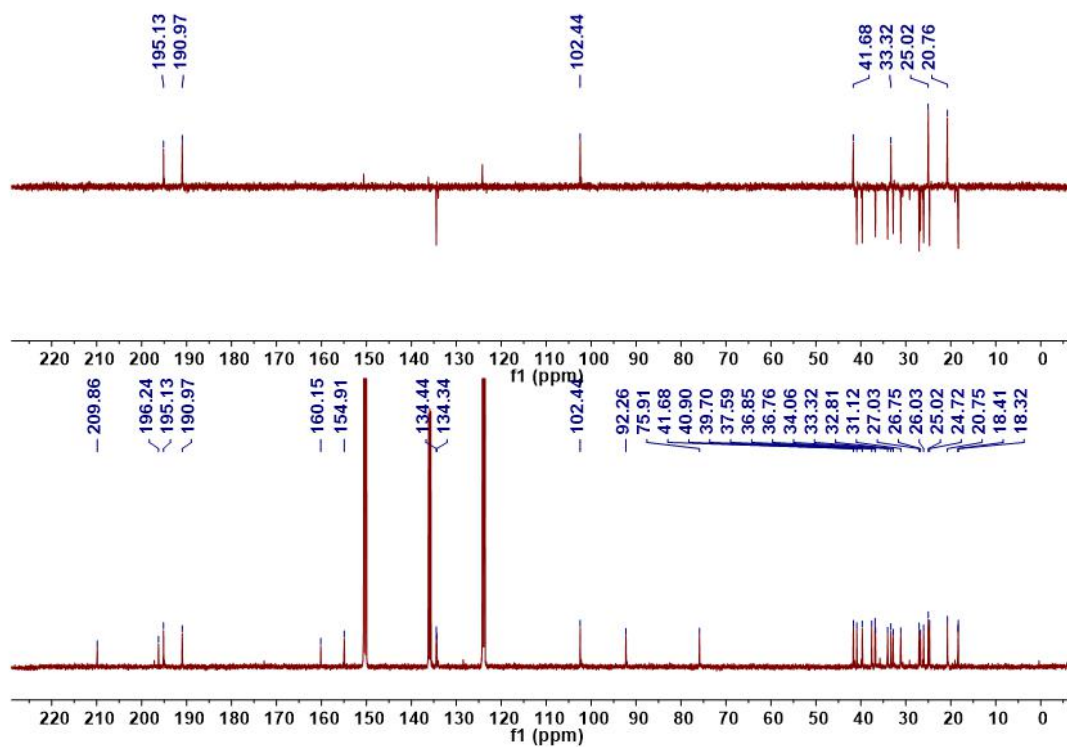

Figure S43.  $^{13}\text{C}$  NMR and DEPT (150 MHz) spectra of **1** in pyridine- $d_5$

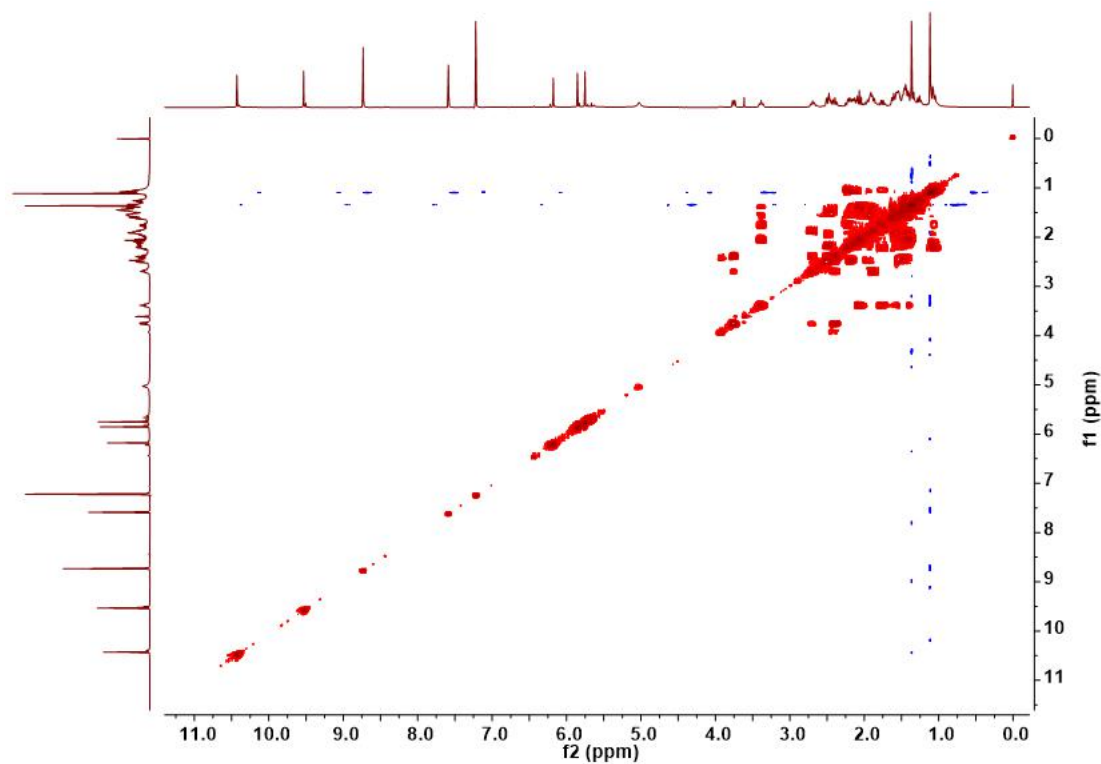

Figure S44.  $^1\text{H}$ - $^1\text{H}$  COSY (600 MHz) spectrum of **1** in pyridine- $d_5$

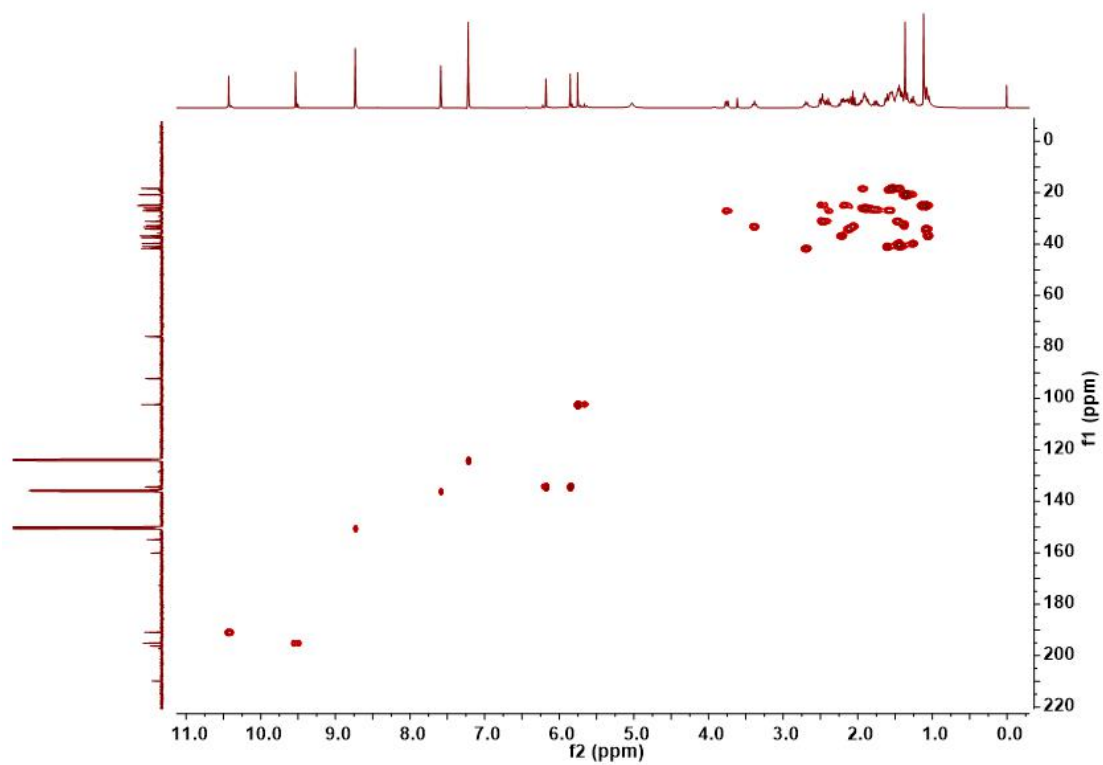

**Figure S45.** HSQC (600 MHz) spectrum of **1** in pyridine-*d*<sub>5</sub>

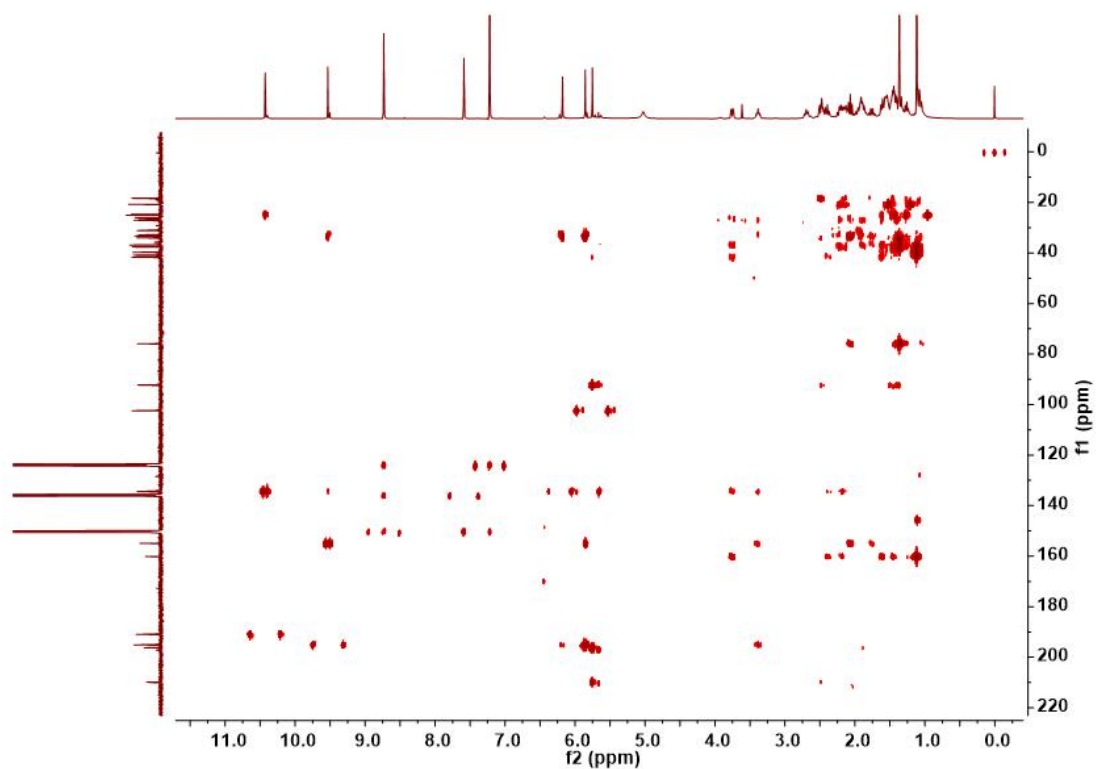

**Figure S46.** HMBC (600 MHz) spectrum of **1** in pyridine-*d*<sub>5</sub>

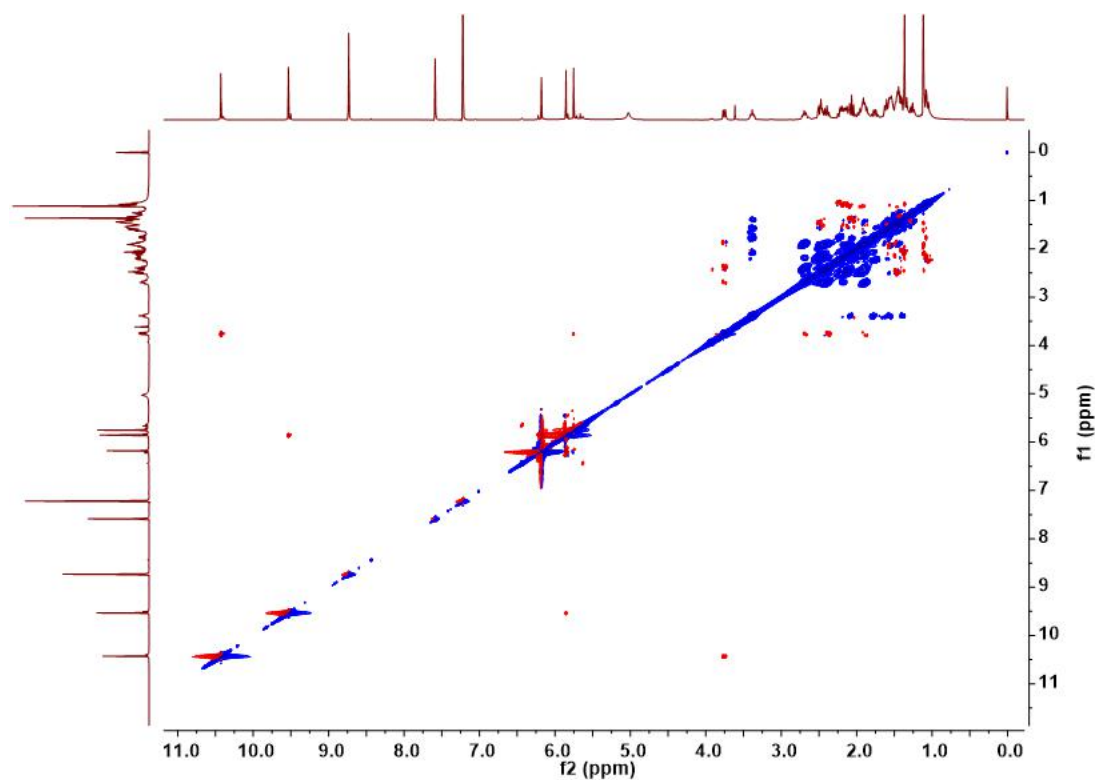

**Figure S47.** ROESY (600 MHz) spectrum of **1** in pyridine-*d*<sub>5</sub>

**Single Mass Analysis**

Tolerance = 5.0 PPM / DBE: min = -1.5, max = 50.0

Element prediction: Off

Number of isotope peaks used for i-FIT = 3

Monoisotopic Mass, Even Electron Ions

129 formula(e) evaluated with 1 results within limits (up to 50 closest results for each mass)

Elements Used:

C: 29-29 H: 0-80 N: 0-5 O: 0-10 Na: 0-1

HCX-41 241 (1.353)

1: TOF MS ES+

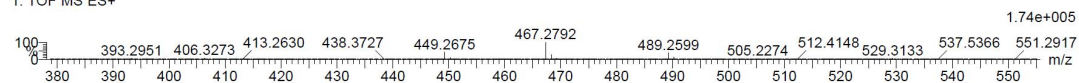

Minimum:

Maximum: 20.0 5.0 -1.5

50.0

| Mass     | Calc. Mass | mDa  | PPM  | DBE  | i-FIT | Norm | Conf(%) | Formula                                        |
|----------|------------|------|------|------|-------|------|---------|------------------------------------------------|
| 467.2792 | 467.2797   | -0.5 | -1.1 | 10.5 | 498.0 | n/a  | n/a     | C <sub>29</sub> H <sub>39</sub> O <sub>5</sub> |

**Figure S48.** HRESIMS of **1**

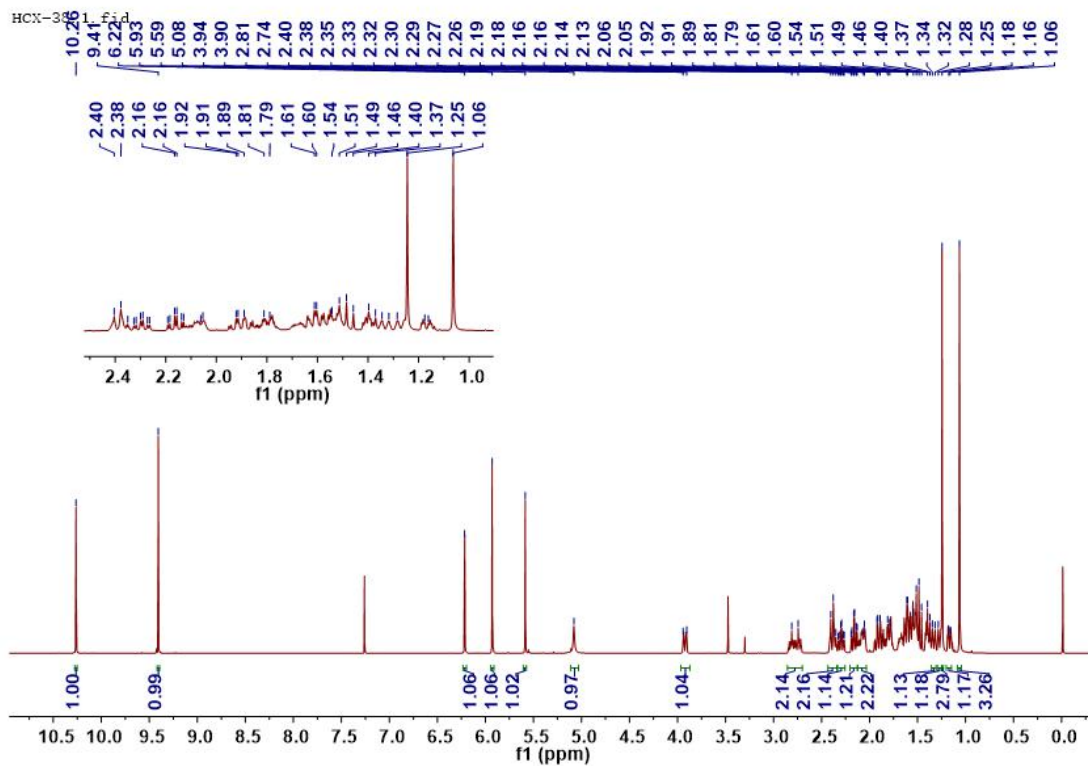

Figure S49.  $^1\text{H}$  NMR (600 MHz) spectrum of **2** in  $\text{CDCl}_3$

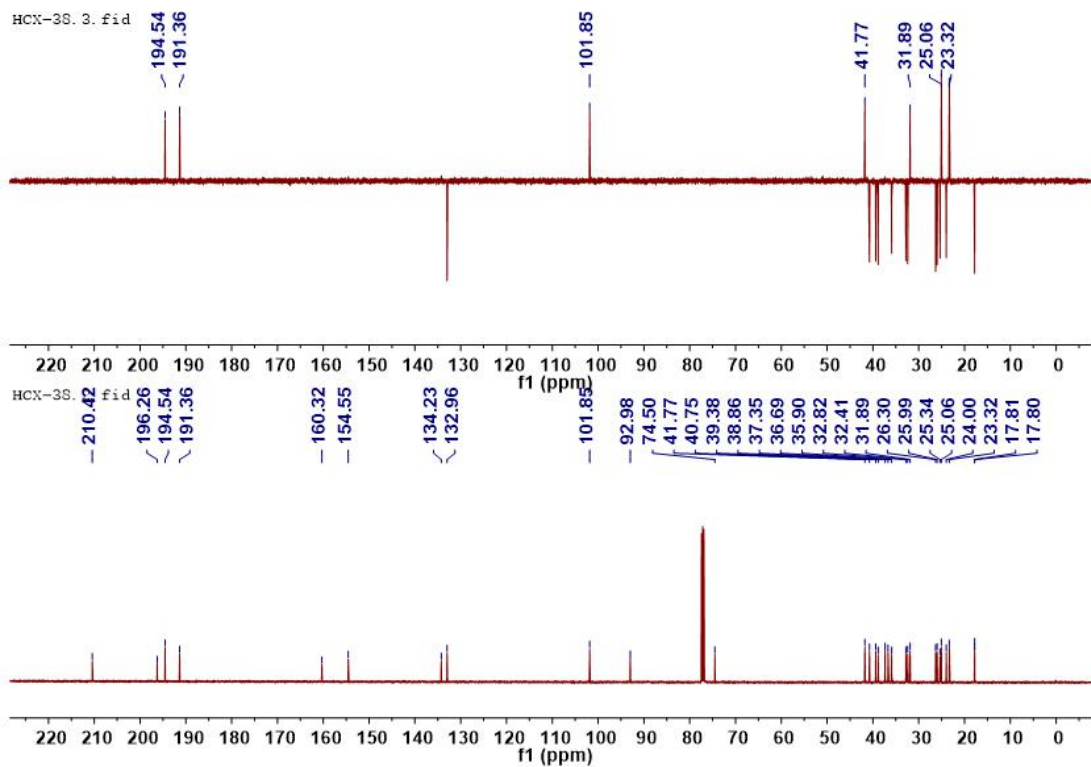

Figure S50.  $^{13}\text{C}$  NMR and DEPT (150 MHz) spectra of **2** in  $\text{CDCl}_3$

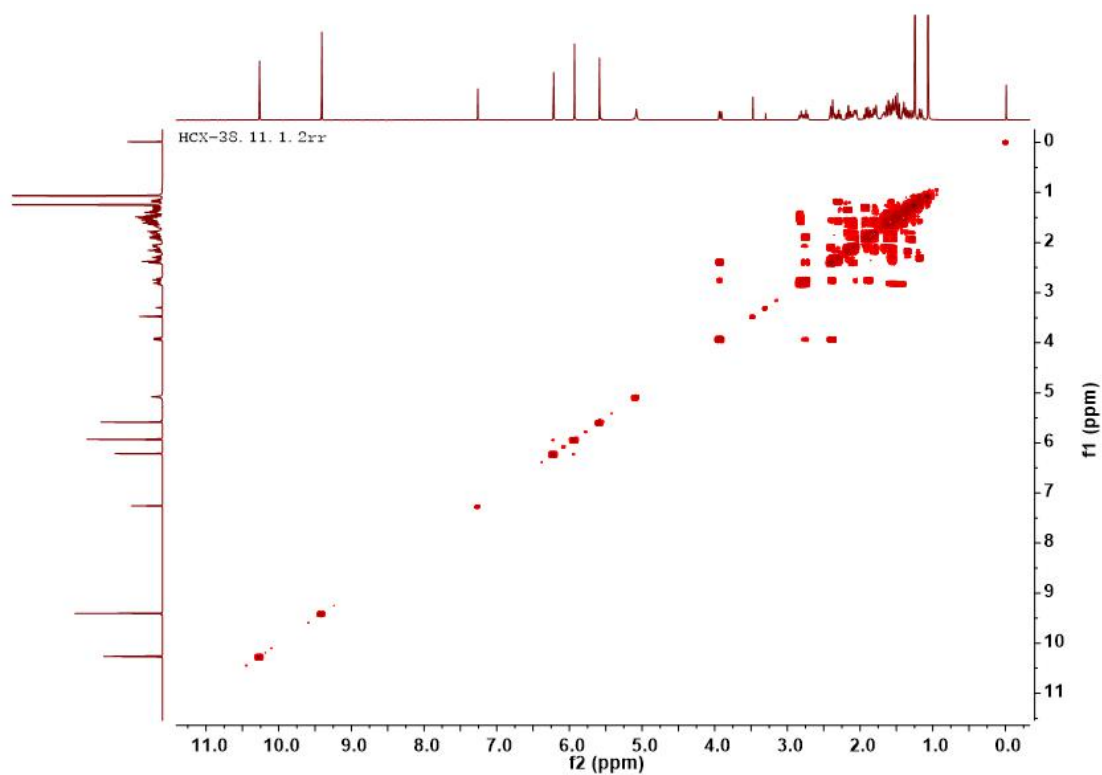

**Figure S51.**  $^1\text{H}$ - $^1\text{H}$  COSY (600 MHz) spectrum of **2** in  $\text{CDCl}_3$

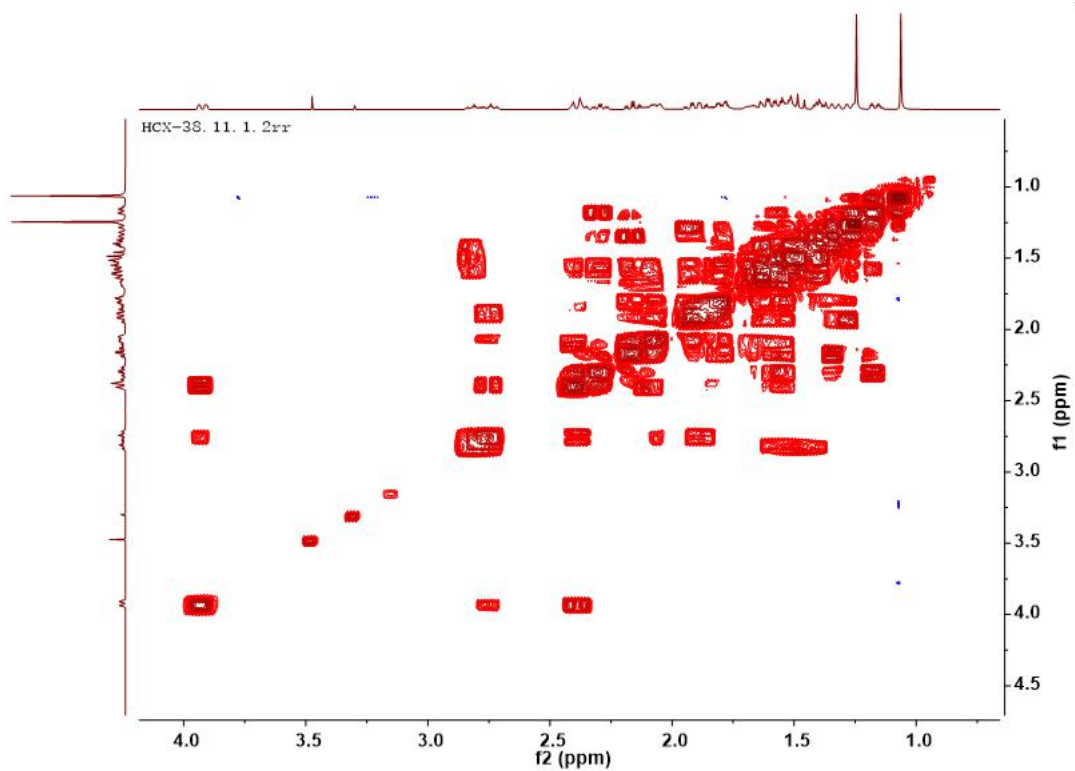

**Figure S52.** Enlarged  $^1\text{H}$ - $^1\text{H}$  COSY (600 MHz) spectrum of **2** in  $\text{CDCl}_3$

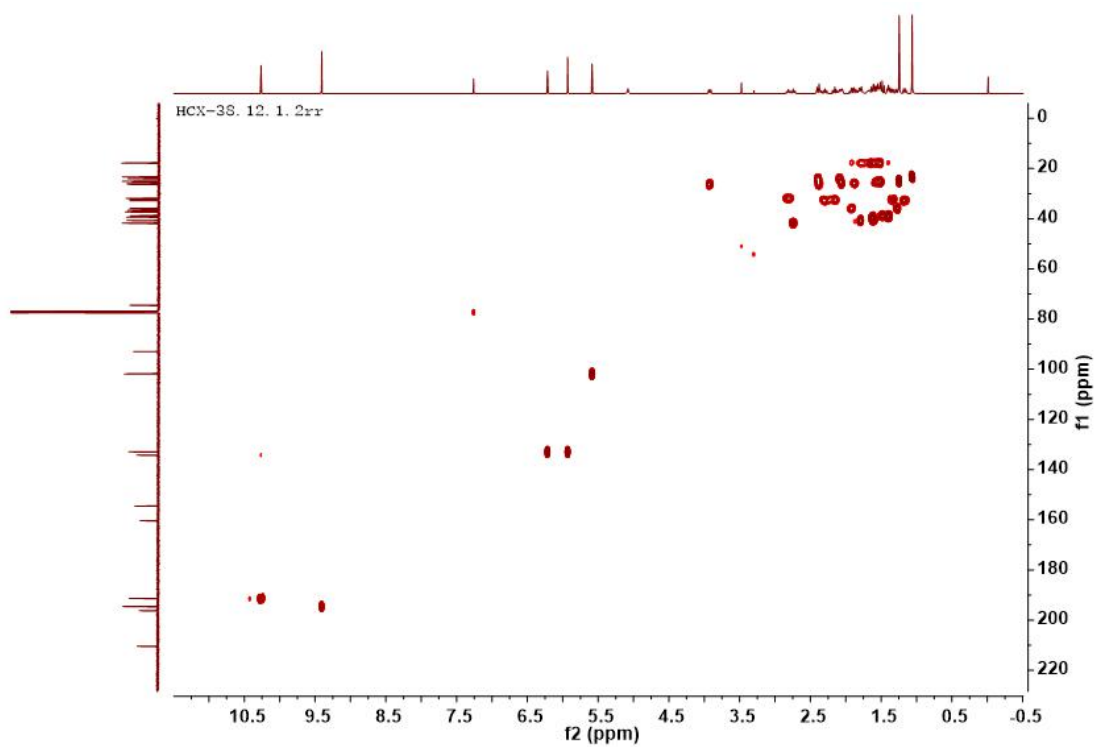

**Figure S53.** HSQC (600 MHz) spectrum of **2** in CDCl<sub>3</sub>

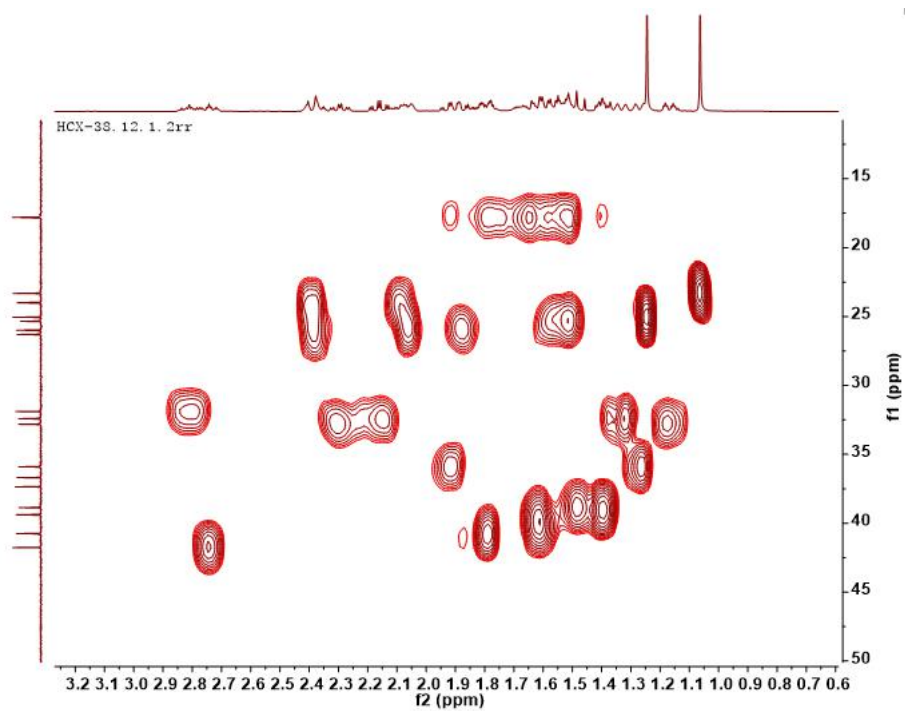

**Figure S54.** Enlarged HSQC (600 MHz) spectrum of **2** in CDCl<sub>3</sub>

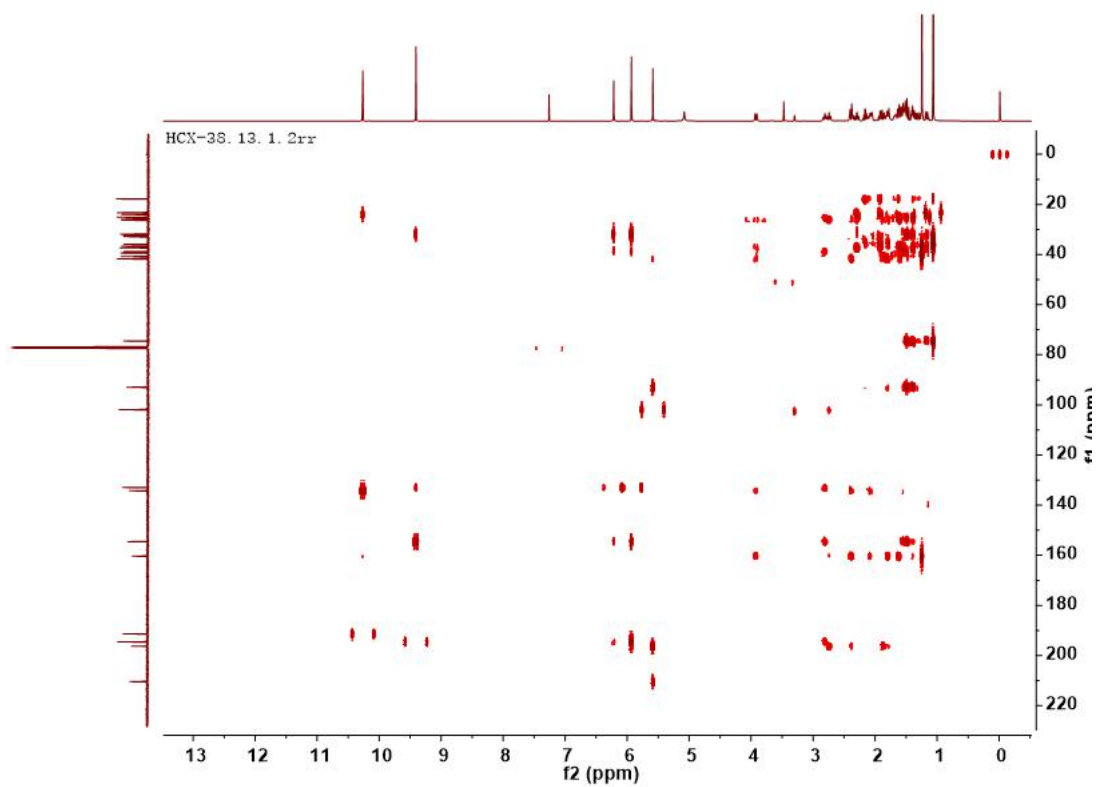

Figure S55. HMBC (600 MHz) spectrum of **2** in CDCl<sub>3</sub>

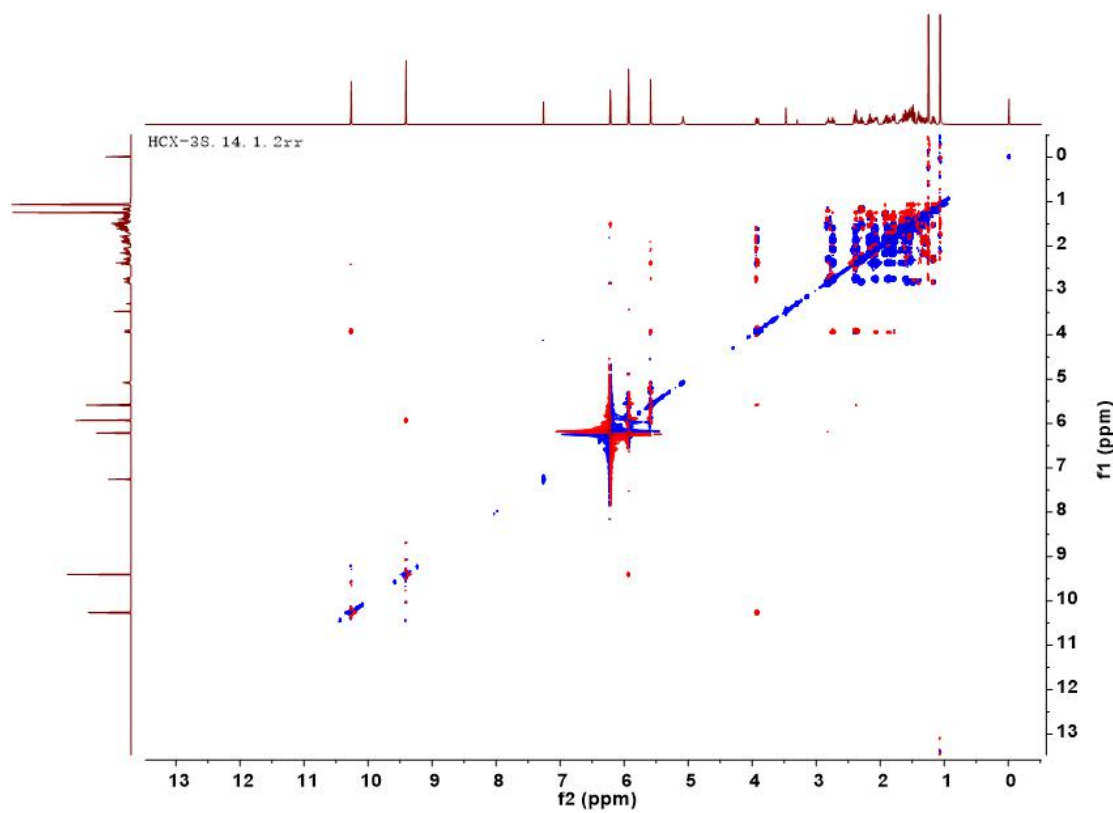

Figure S56. ROESY (600 MHz) spectrum of **2** in CDCl<sub>3</sub>

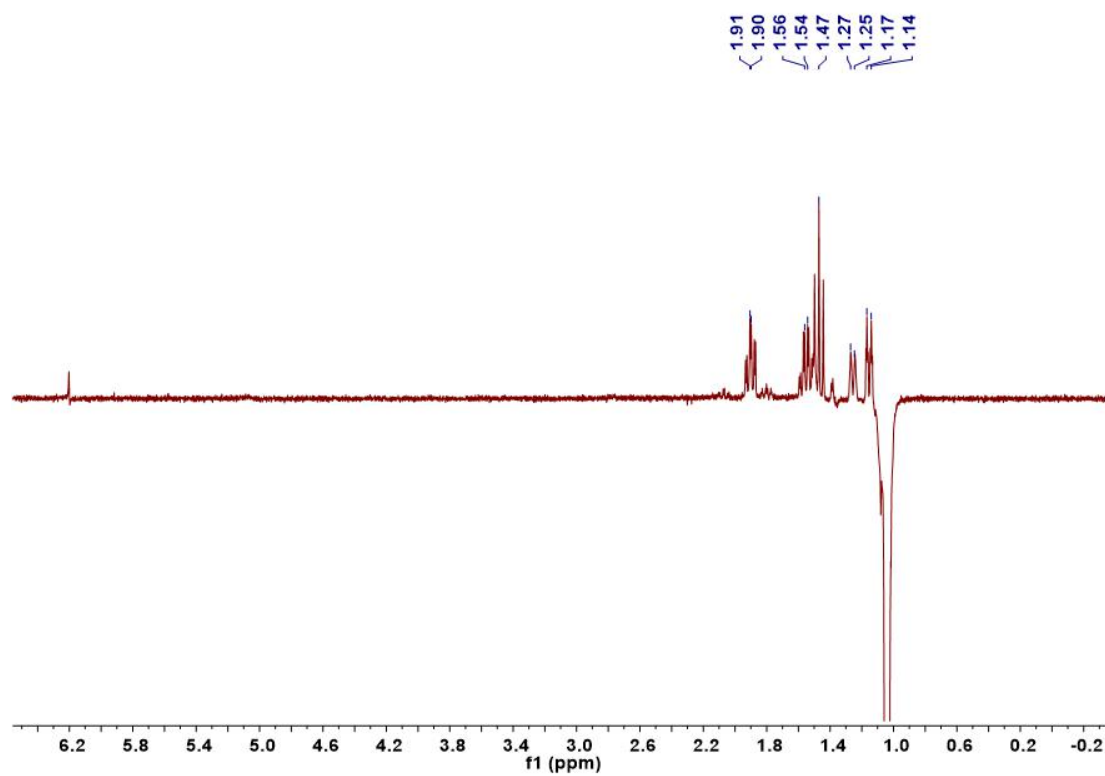

**Figure S57.** NOE irradiation spectrum (freq: 1.06 ppm) of compound **2** in CDCl<sub>3</sub>

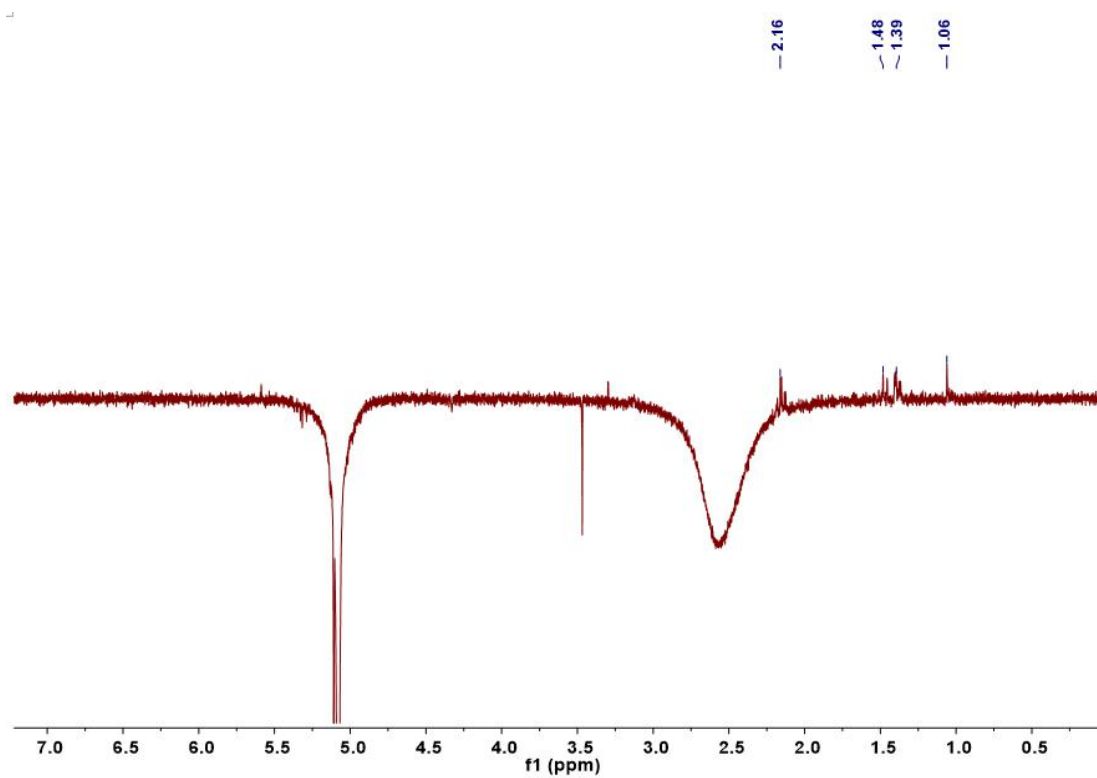

**Figure S58.** NOE irradiation spectrum (freq: 5.09 ppm) of compound **2** in CDCl<sub>3</sub>



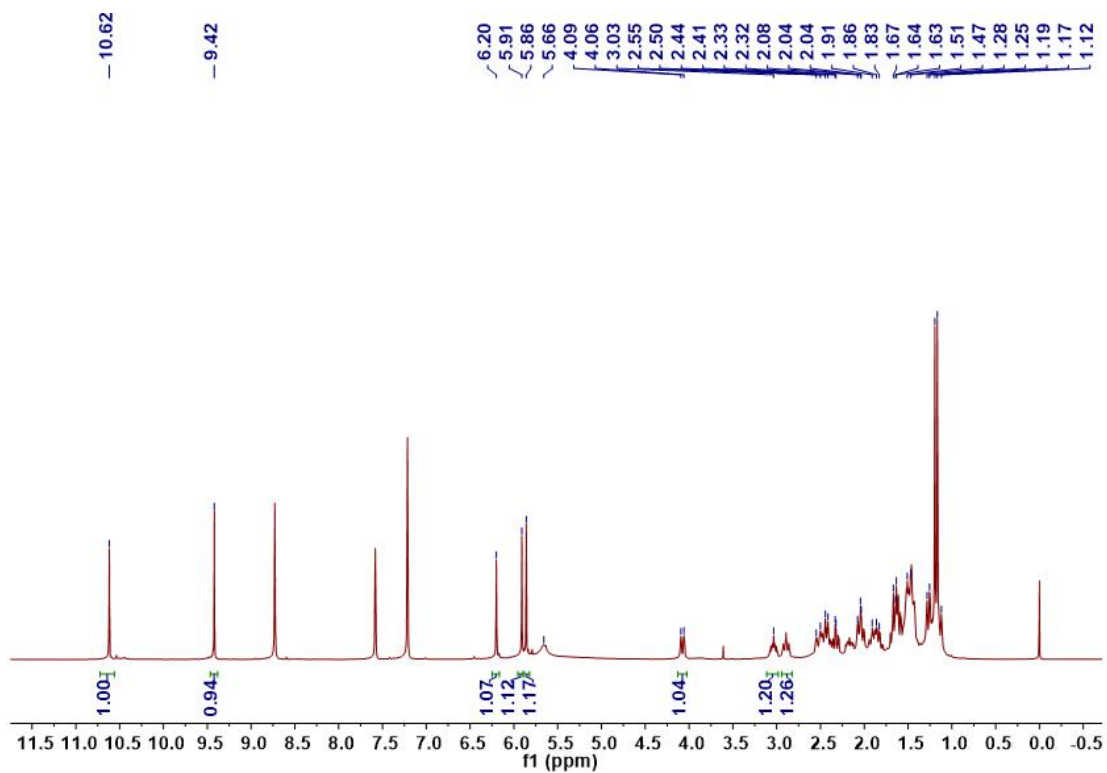

Figure S59.  $^1\text{H}$  NMR (600 MHz) spectrum of **2** in pyridine- $d_5$

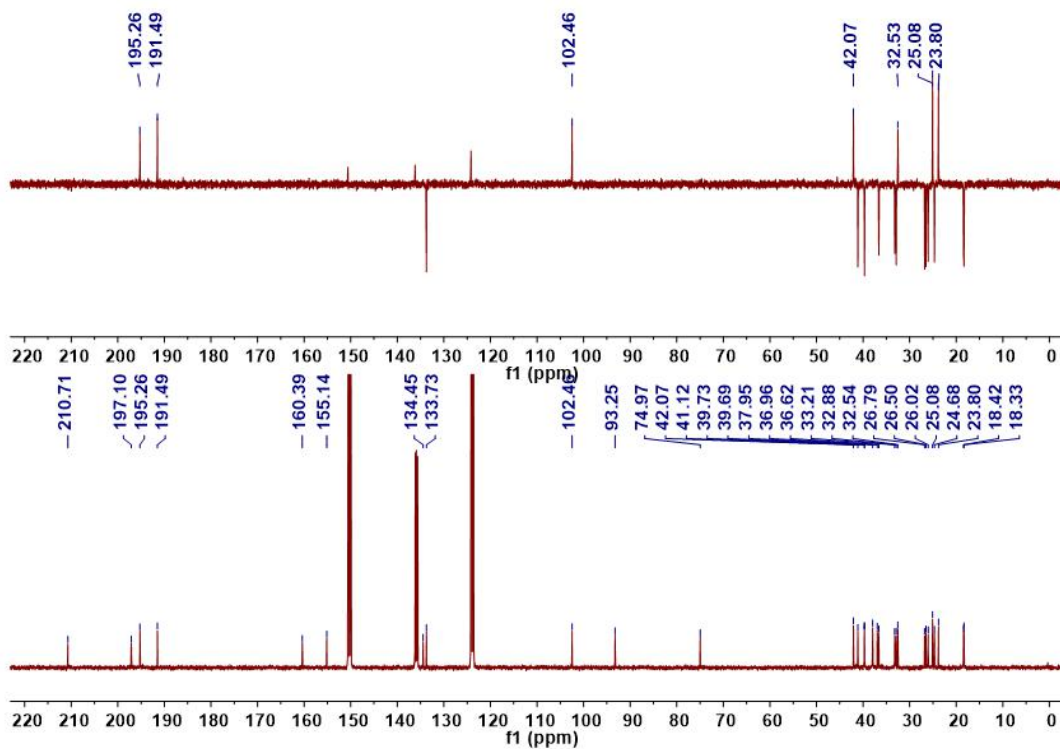

Figure S60.  $^{13}\text{C}$  NMR and DEPT (150 MHz) spectra of **2** in pyridine- $d_5$

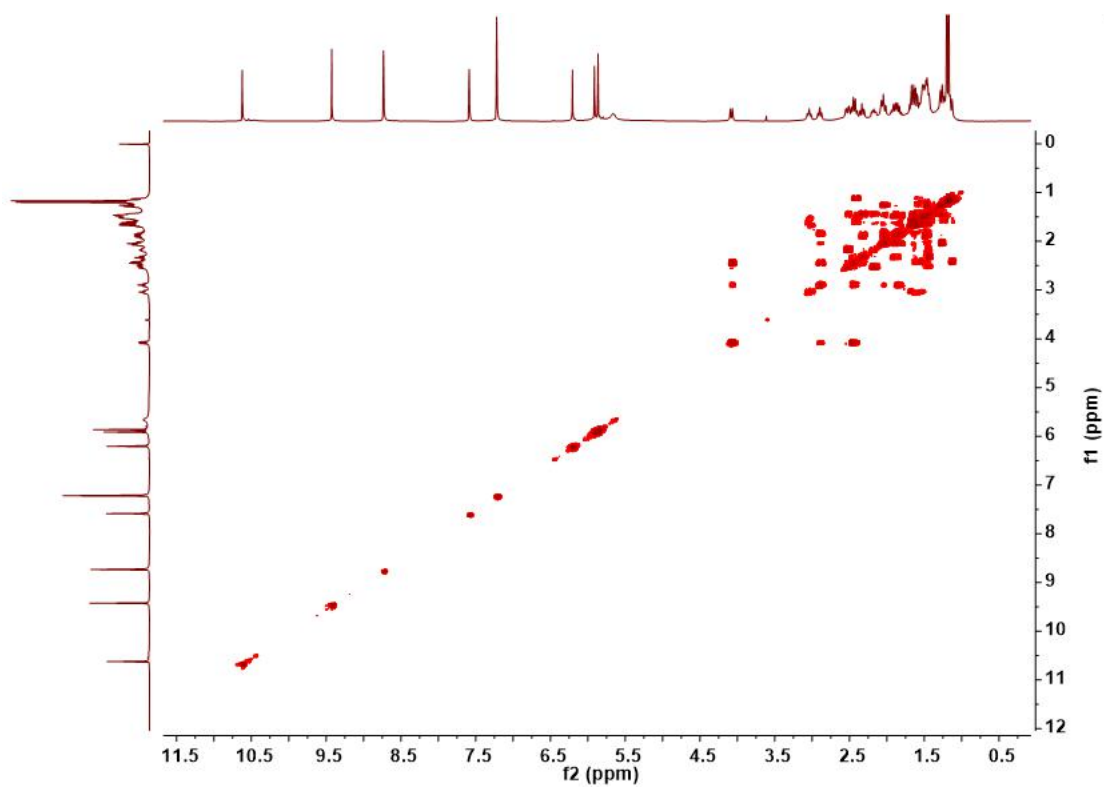

**Figure S61.**  $^1\text{H}$ - $^1\text{H}$  COSY (600 MHz) spectrum of **2** in pyridine- $d_5$

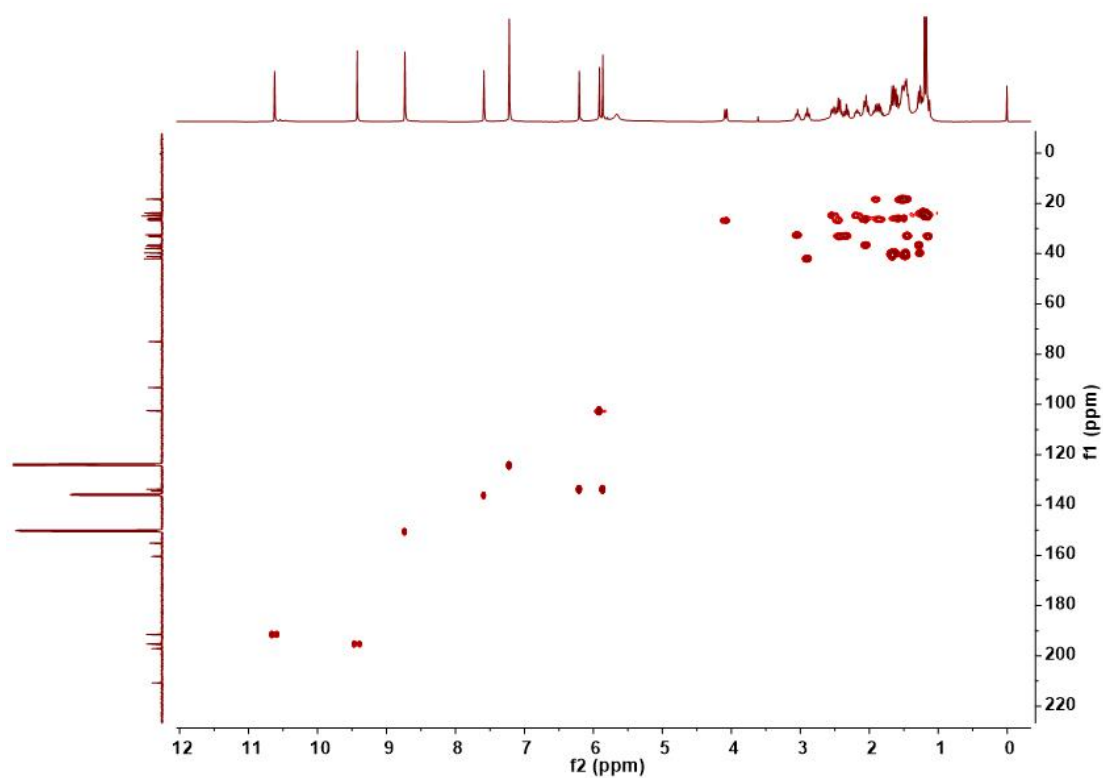

**Figure S62.** HSQC (600 MHz) spectrum of **2** in pyridine- $d_5$

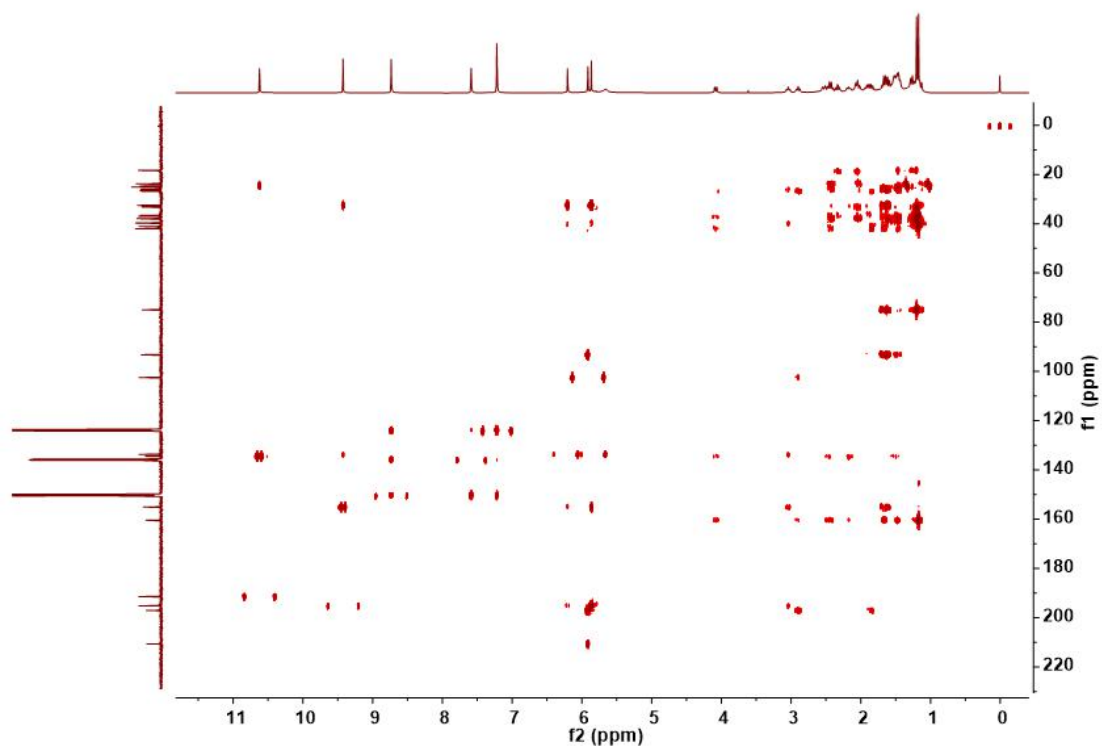

**Figure S63.** HMBC (600 MHz) spectrum of **2** in pyridine-*d*<sub>5</sub>

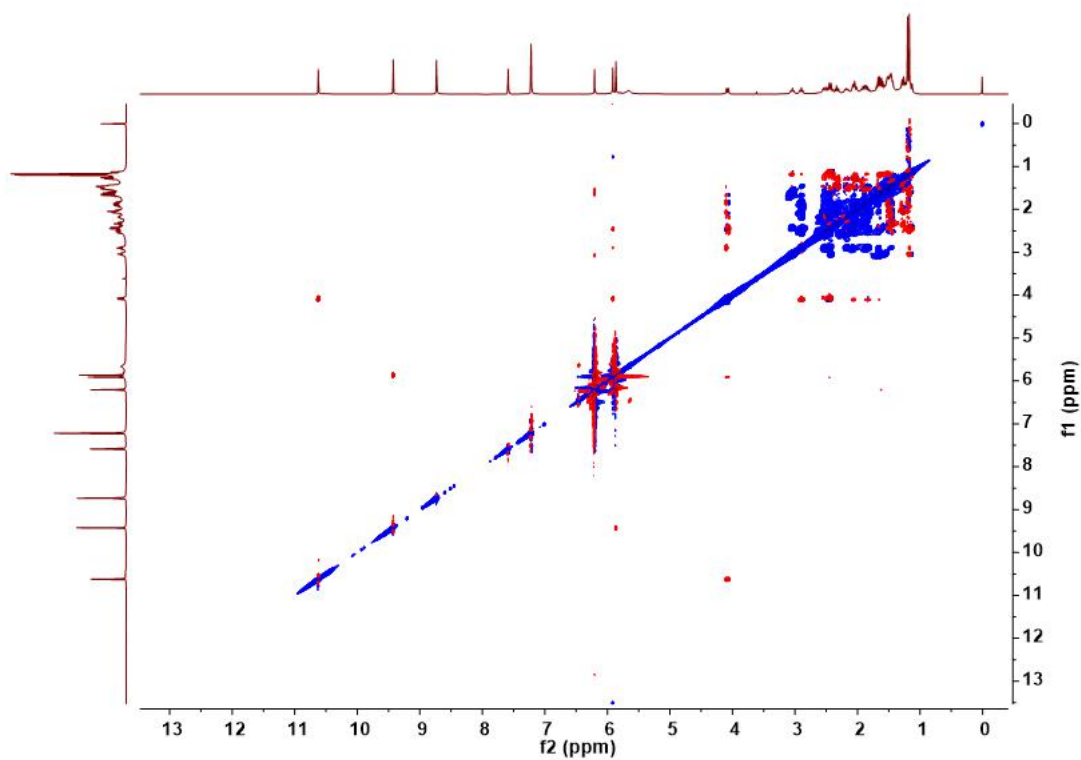

**Figure S64.** ROESY (600 MHz) spectrum of **2** in pyridine-*d*<sub>5</sub>

## Single Mass Analysis

Tolerance = 5.0 PPM / DBE: min = -1.5, max = 50.0

Element prediction: Off

Number of isotope peaks used for i-FIT = 3

Monoisotopic Mass, Even Electron Ions

129 formula(e) evaluated with 1 results within limits (up to 50 closest results for each mass)

Elements Used:

C: 29-29 H: 0-80 N: 0-5 O: 0-10 Na: 0-1

HCX-38 266 (1.484)

1: TOF MS ES+

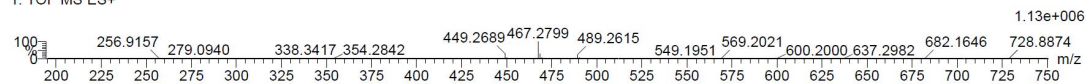Minimum: -1.5  
Maximum: 20.0 5.0 50.0

| Mass     | Calc. Mass | mDa | PPM | DBE  | i-FIT | Norm | Conf(%) | Formula    |
|----------|------------|-----|-----|------|-------|------|---------|------------|
| 467.2799 | 467.2797   | 0.2 | 0.4 | 10.5 | 636.5 | n/a  | n/a     | C29 H39 O5 |

Figure S65. HRESIMS of 2

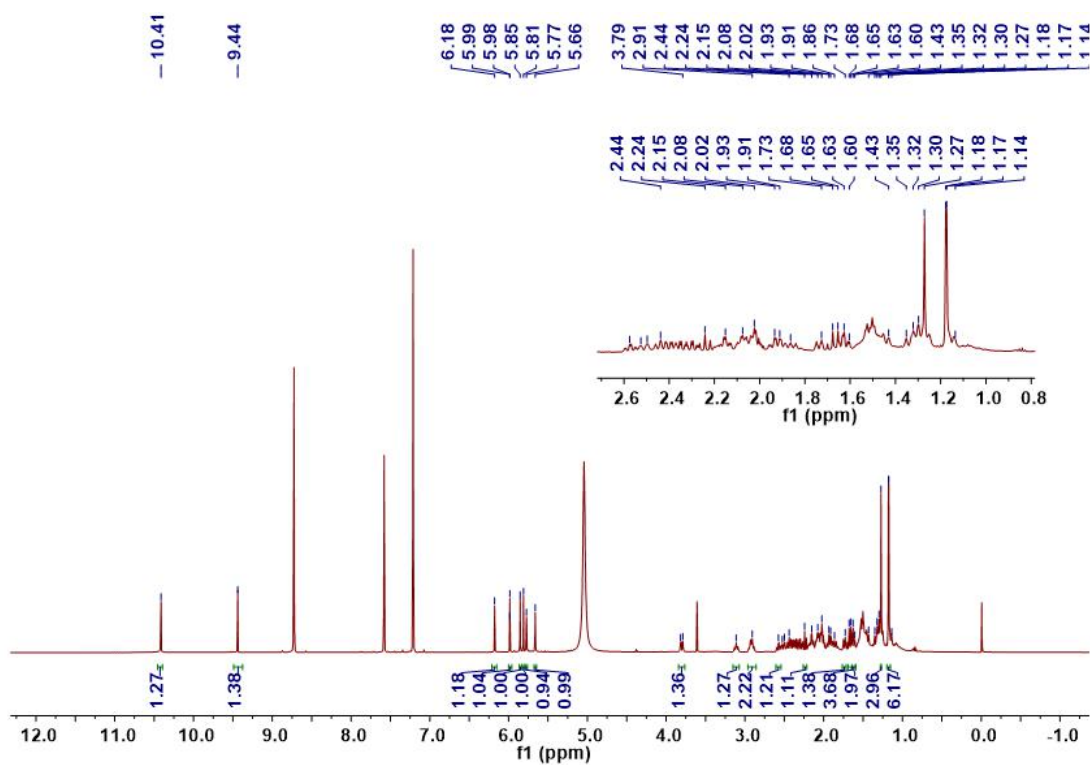Figure S66. <sup>1</sup>H NMR (600 MHz) spectrum of 3 in pyridine-*d*<sub>5</sub>

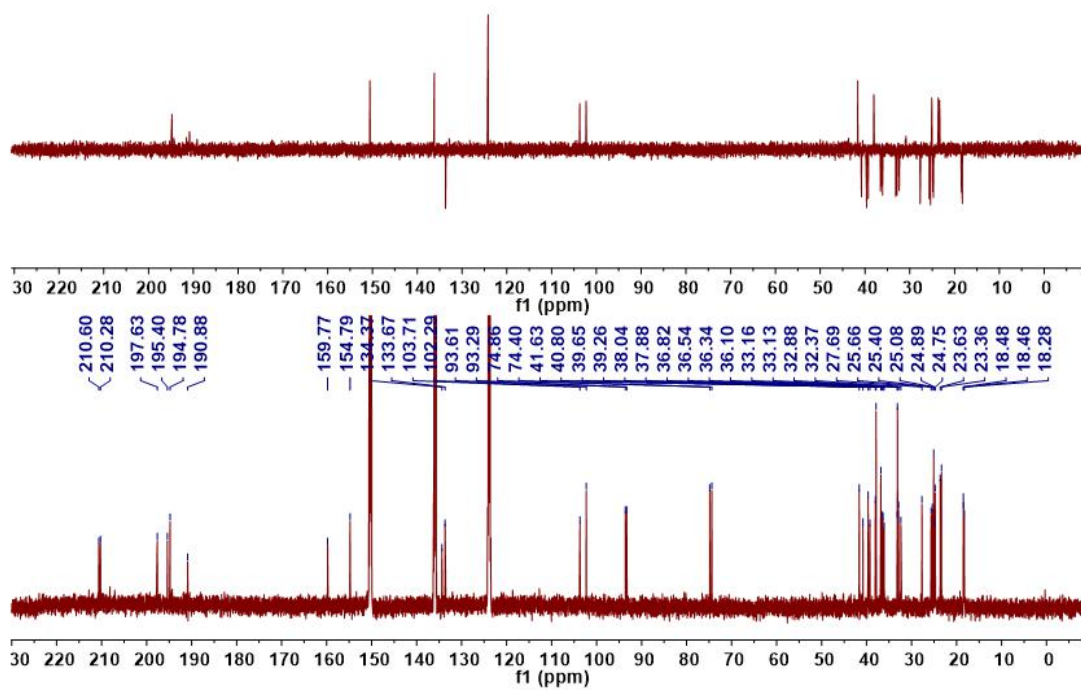

Figure S67.  $^{13}\text{C}$  NMR and DEPT (150 MHz) spectra of **3** in pyridine- $d_5$

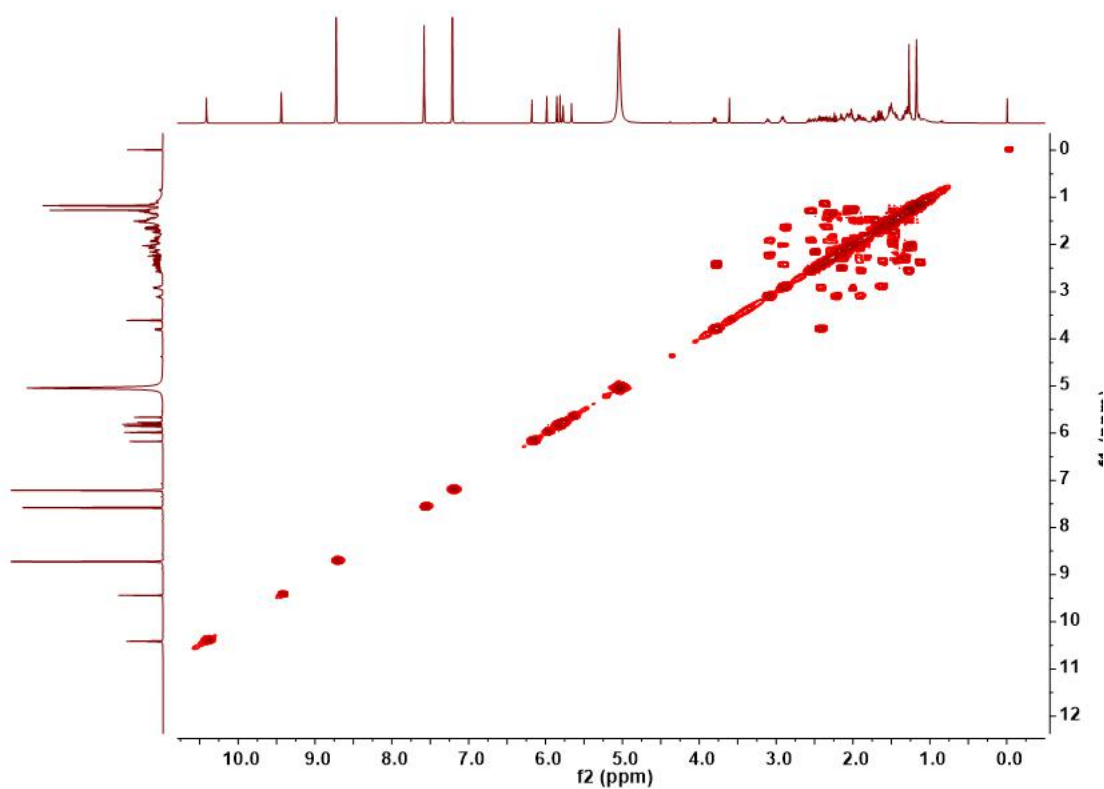

Figure S68.  $^1\text{H}$ - $^1\text{H}$  COSY (600 MHz) spectrum of **3** in pyridine- $d_5$

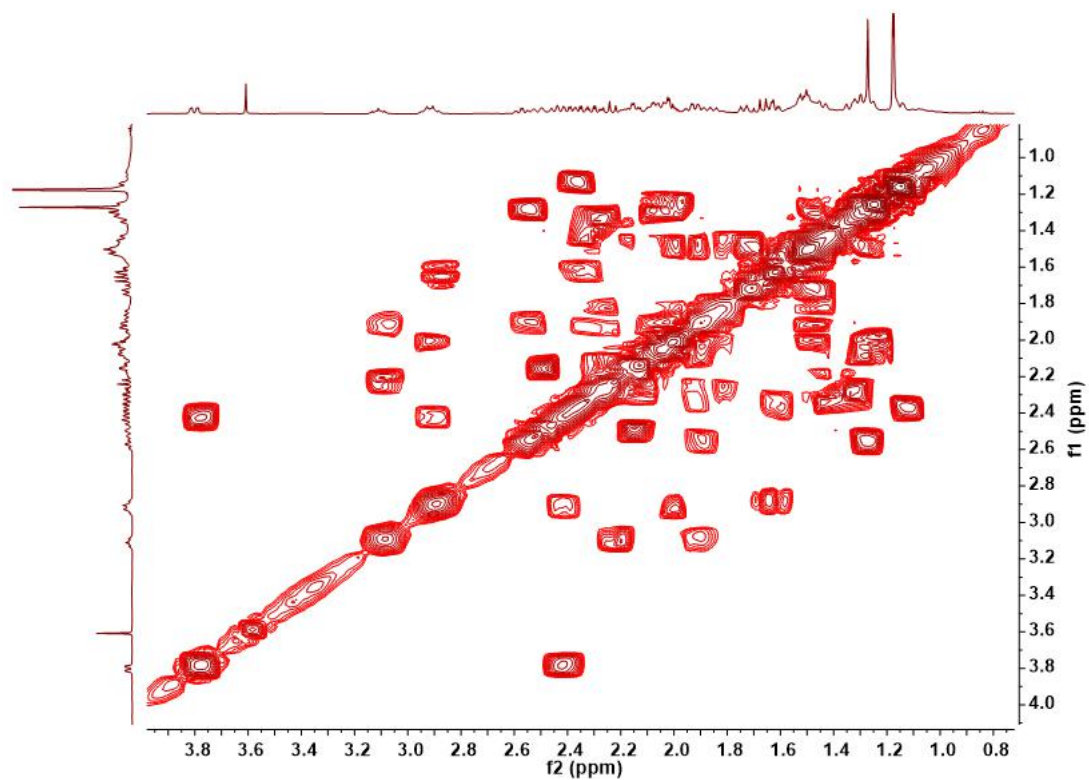

Figure S69. Enlarged  $^1\text{H}$ - $^1\text{H}$  COSY (600 MHz) spectrum of **3** in pyridine- $d_5$

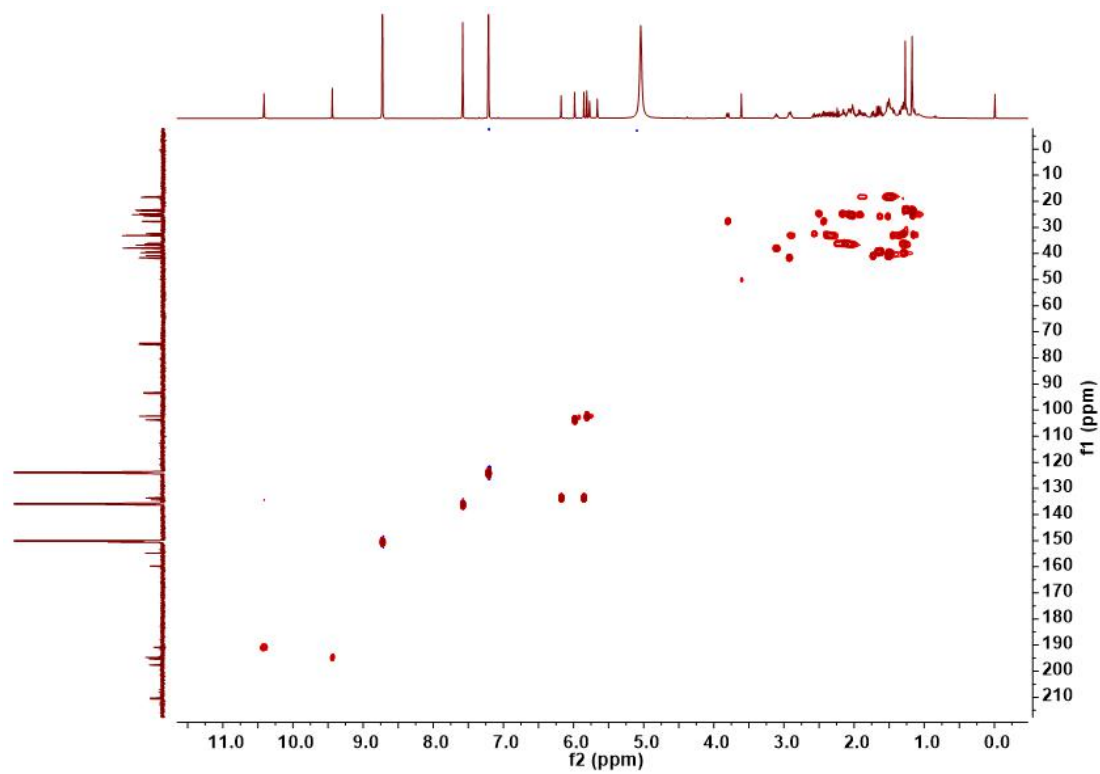

Figure S70. HSQC (600 MHz) spectrum of **3** in pyridine- $d_5$

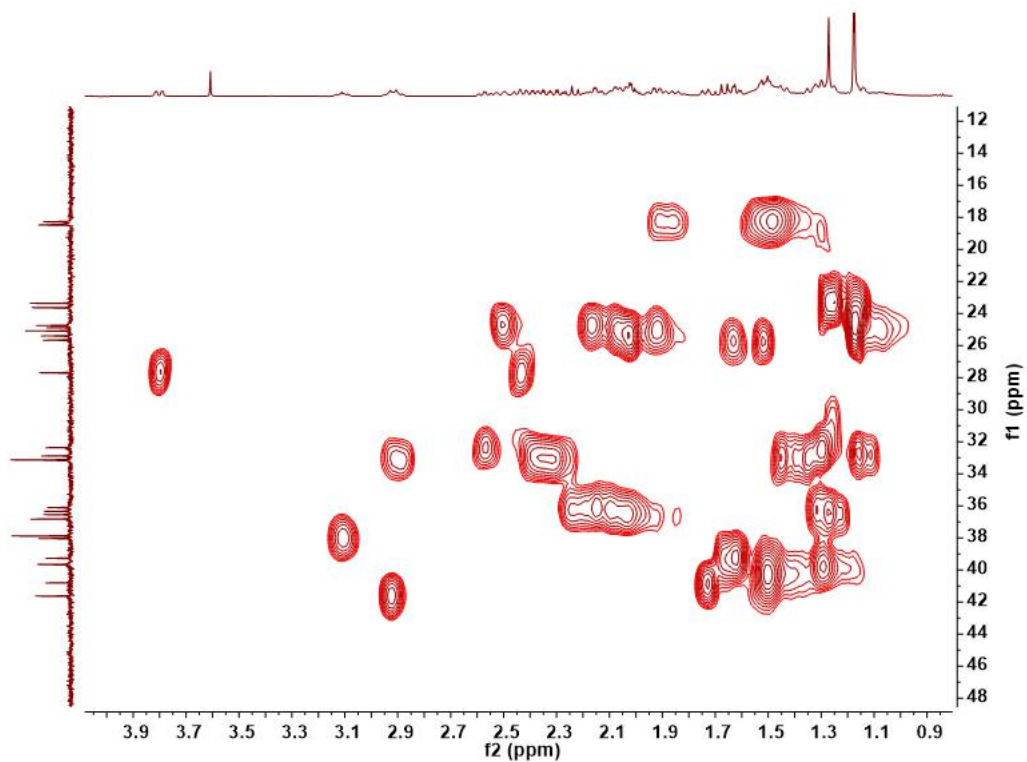

**Figure S71.** Enlarged HSQC (600 MHz) spectrum of **3** in pyridine-*d*<sub>5</sub>

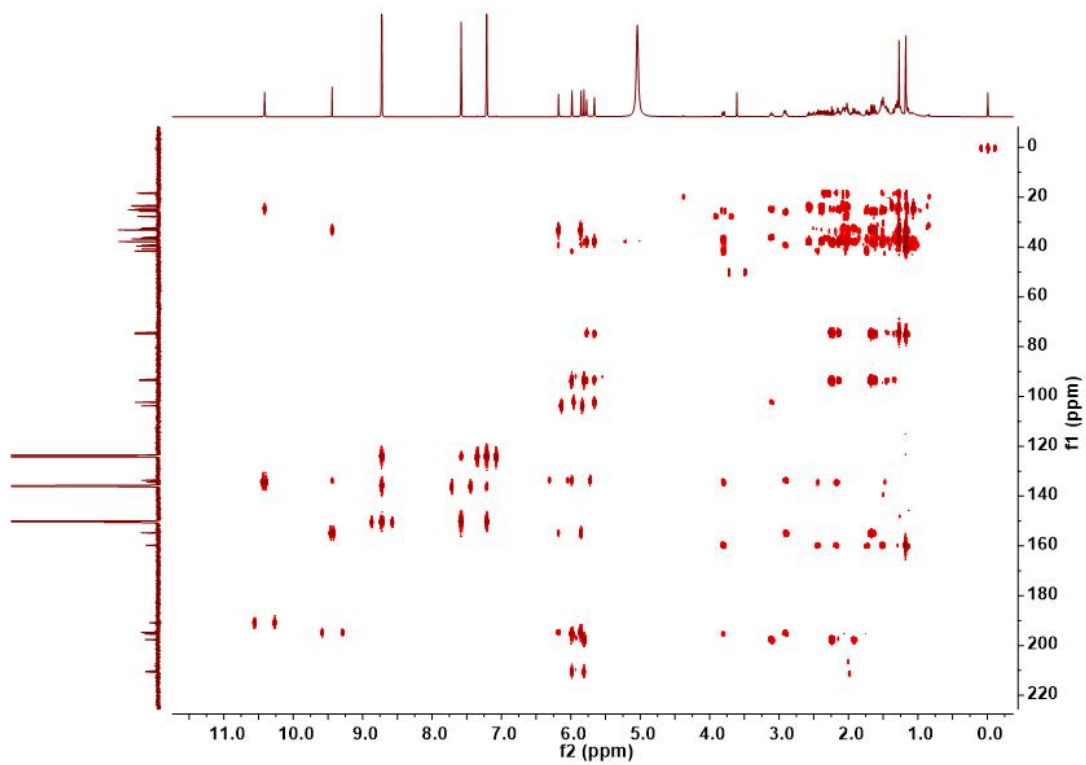

**Figure S72.** HMBC (600 MHz) spectrum of **3** in pyridine-*d*<sub>5</sub>

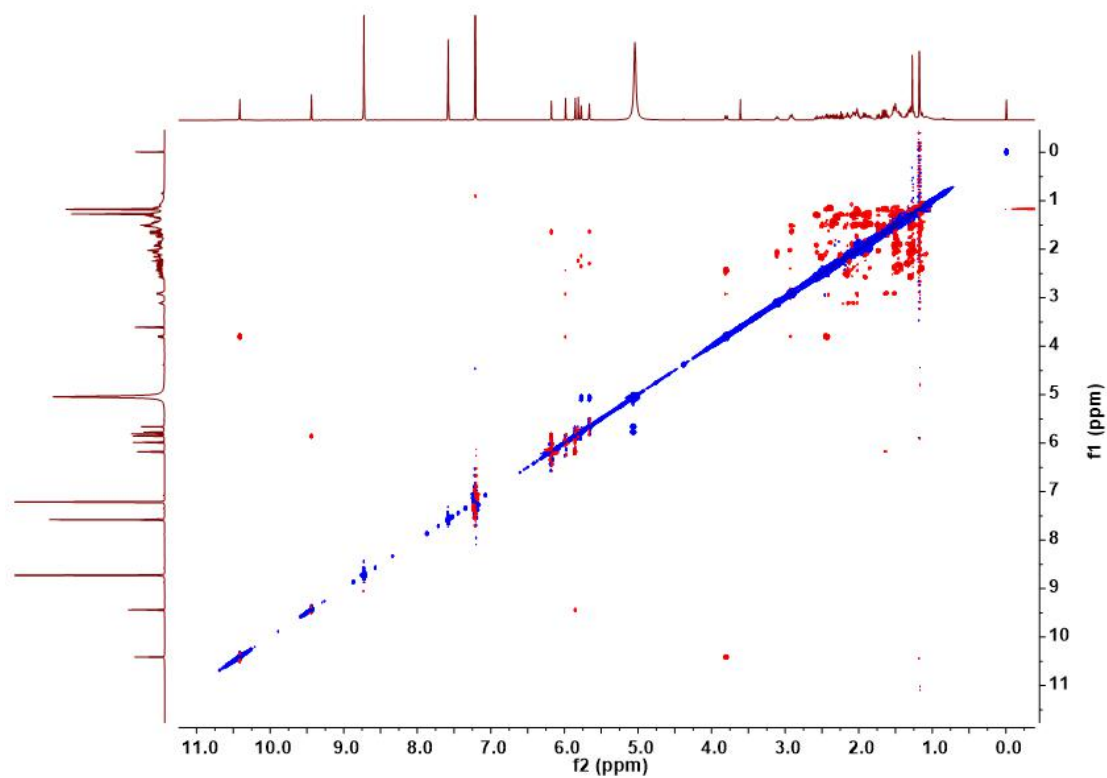

**Figure S73.** ROESY (600 MHz) spectrum of **3** in pyridine-*d*<sub>5</sub>

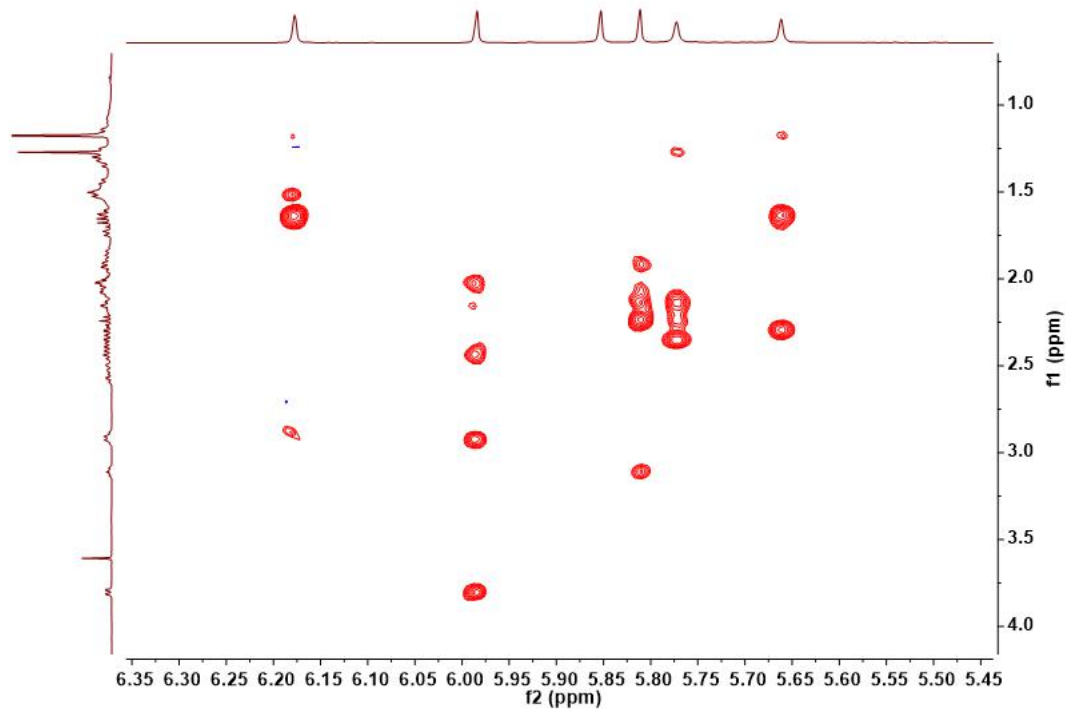

**Figure S74.** Enlarged ROESY (600 MHz) spectrum of **3** in pyridine-*d*<sub>5</sub>



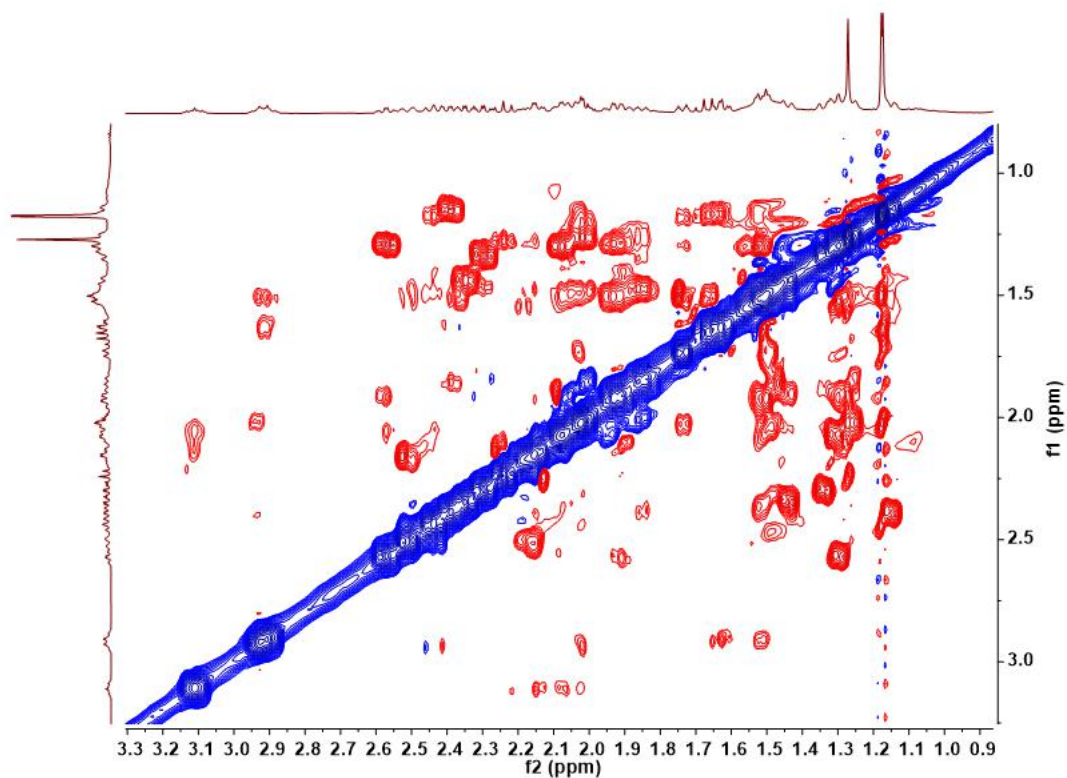

**Figure S75.** Enlarged ROESY (600 MHz) spectrum of **3** in pyridine-*d*<sub>5</sub>

**Elemental Composition Report**

Page 1

**Single Mass Analysis**

Tolerance = 5.0 PPM / DBE: min = -1.5, max = 50.0  
 Element prediction: Off  
 Number of isotope peaks used for i-FIT = 3

Monoisotopic Mass, Even Electron Ions  
 114 formula(e) evaluated with 1 results within limits (up to 50 closest results for each mass)  
 Elements Used:  
 C: 43-43 H: 0-80 N: 0-5 O: 0-10 Na: 0-1  
 HCX-51 167 (0.941)  
 1: TOF MS ES+

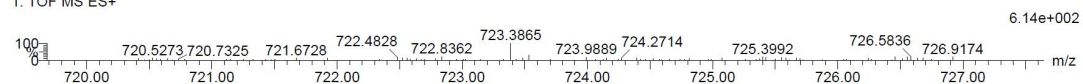

| Mass     | Calc. Mass | nDa  | PPM  | DBE  | i-FIT | Norm | Conf(%) | Formula       |
|----------|------------|------|------|------|-------|------|---------|---------------|
| 723.3865 | 723.3873   | -0.8 | -1.1 | 15.5 | 271.3 | n/a  | n/a     | C43 H56 O8 Na |

**Figure S76.** HRESIMS of **3**

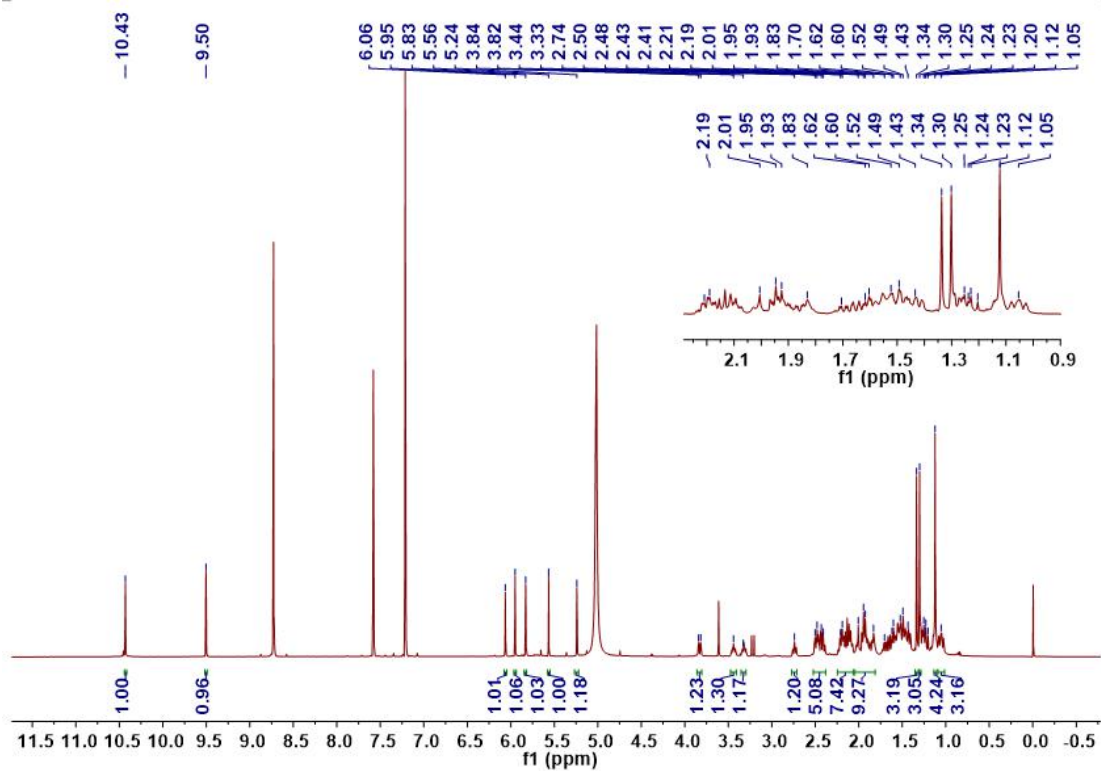

Figure S77.  $^1\text{H}$  NMR (600 MHz) spectrum of **4** in pyridine- $d_5$

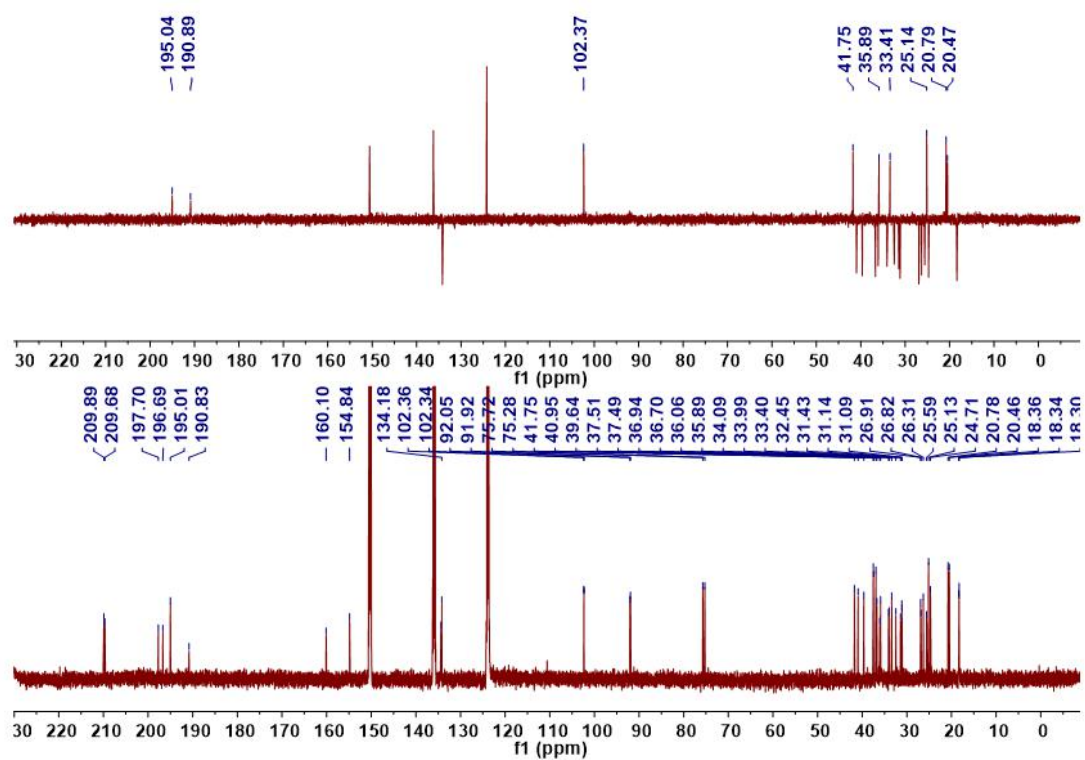

Figure S78.  $^{13}\text{C}$  NMR and DEPT (150 MHz) spectra of **4** in pyridine- $d_5$

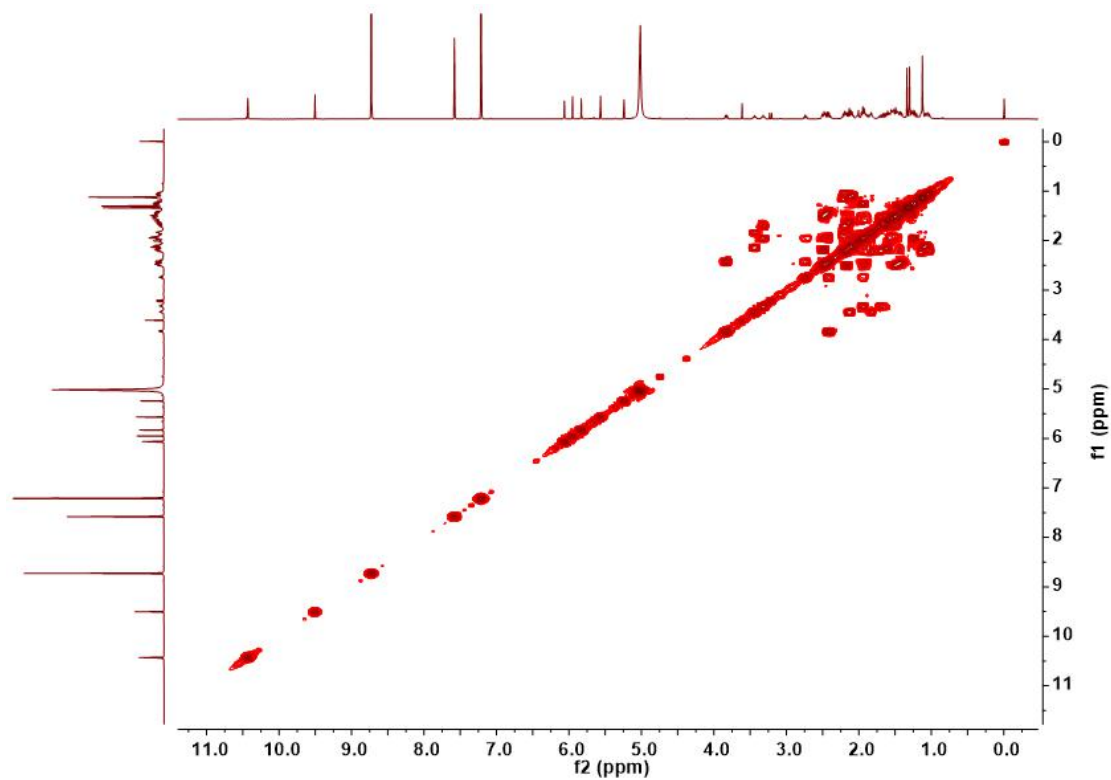

**Figure S79.**  $^1\text{H}$ - $^1\text{H}$  COSY (600 MHz) spectrum of **4** in pyridine- $d_5$

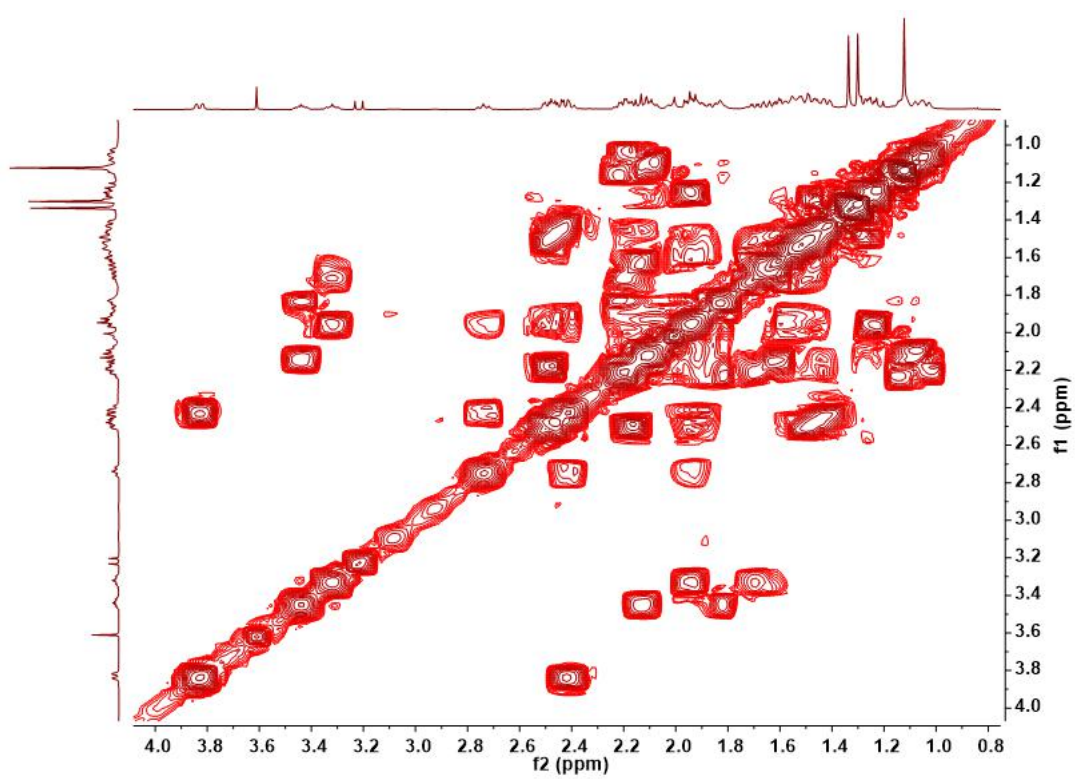

**Figure S80.** Enlarged  $^1\text{H}$ - $^1\text{H}$  COSY (600 MHz) spectrum of **4** in pyridine- $d_5$

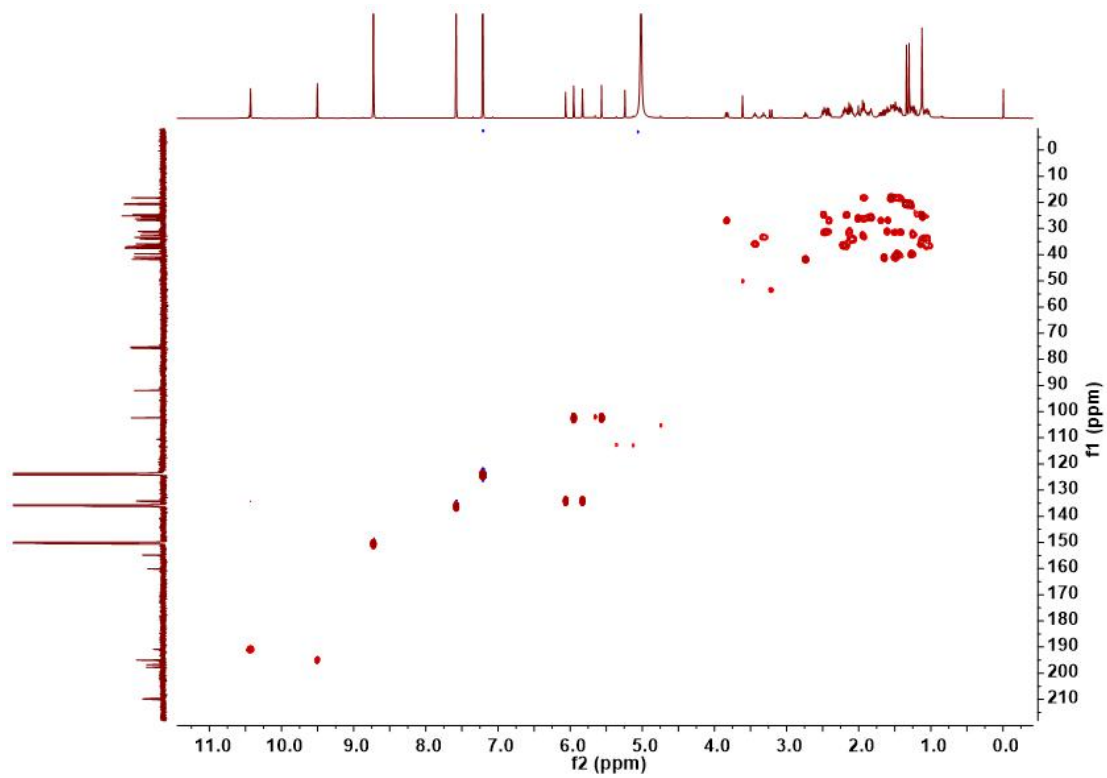

**Figure S81.** HSQC (600 MHz) spectrum of **4** in pyridine-*d*<sub>5</sub>

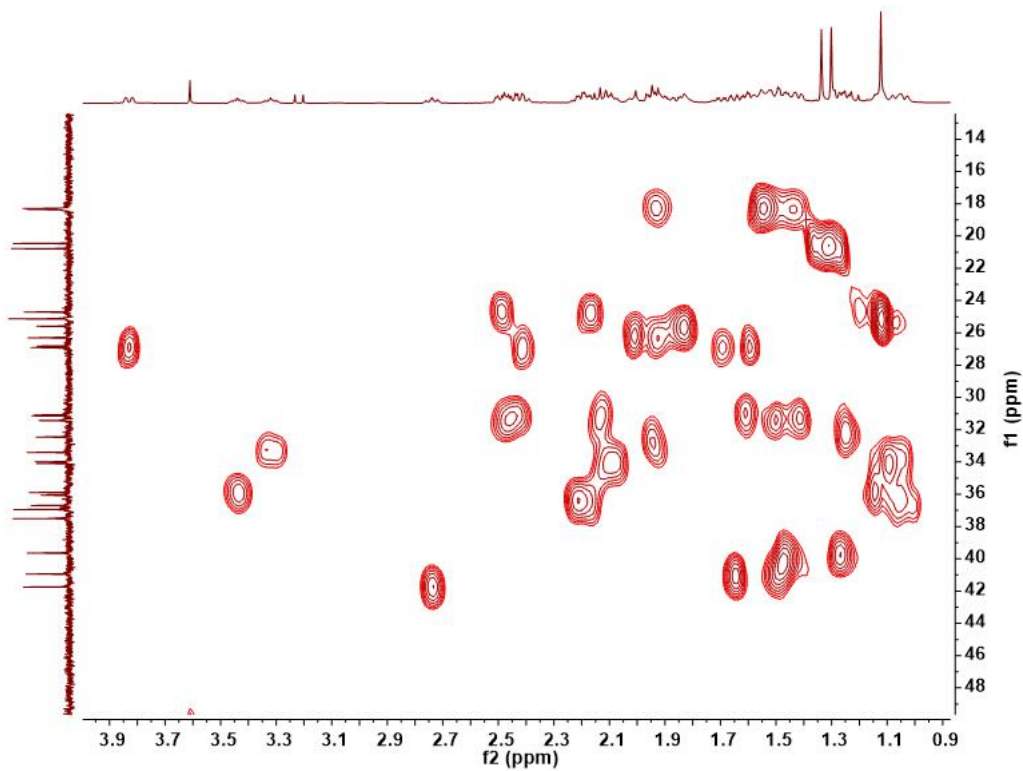

**Figure S82.** Enlarged HSQC (600 MHz) spectrum of **4** in pyridine-*d*<sub>5</sub>

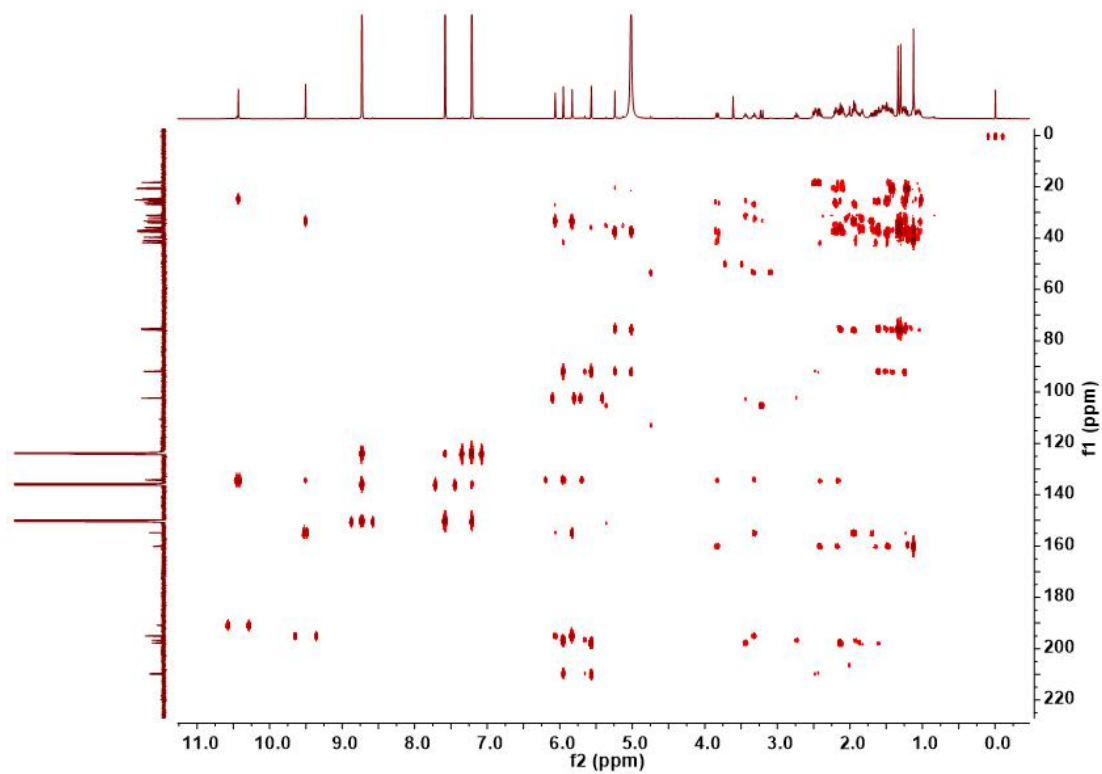

**Figure S83.** HMBC (600 MHz) spectrum of **4** in pyridine-*d*<sub>5</sub>

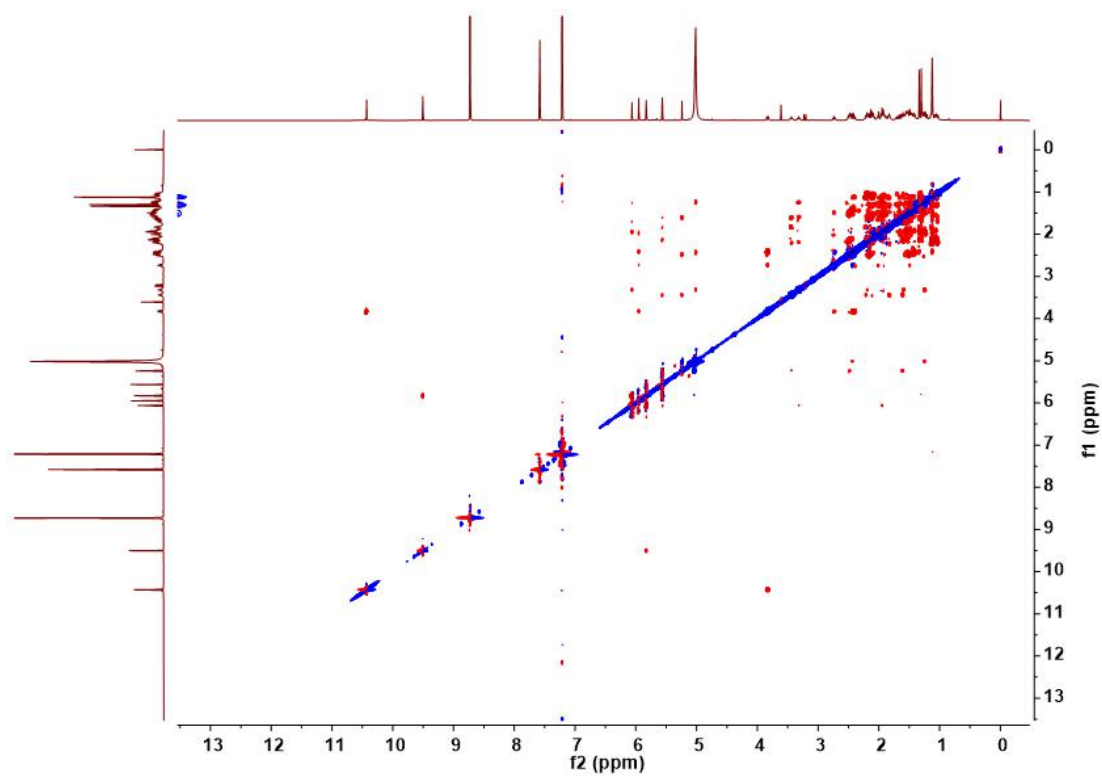

**Figure S84.** ROESY (600 MHz) spectrum of **4** in pyridine-*d*<sub>5</sub>

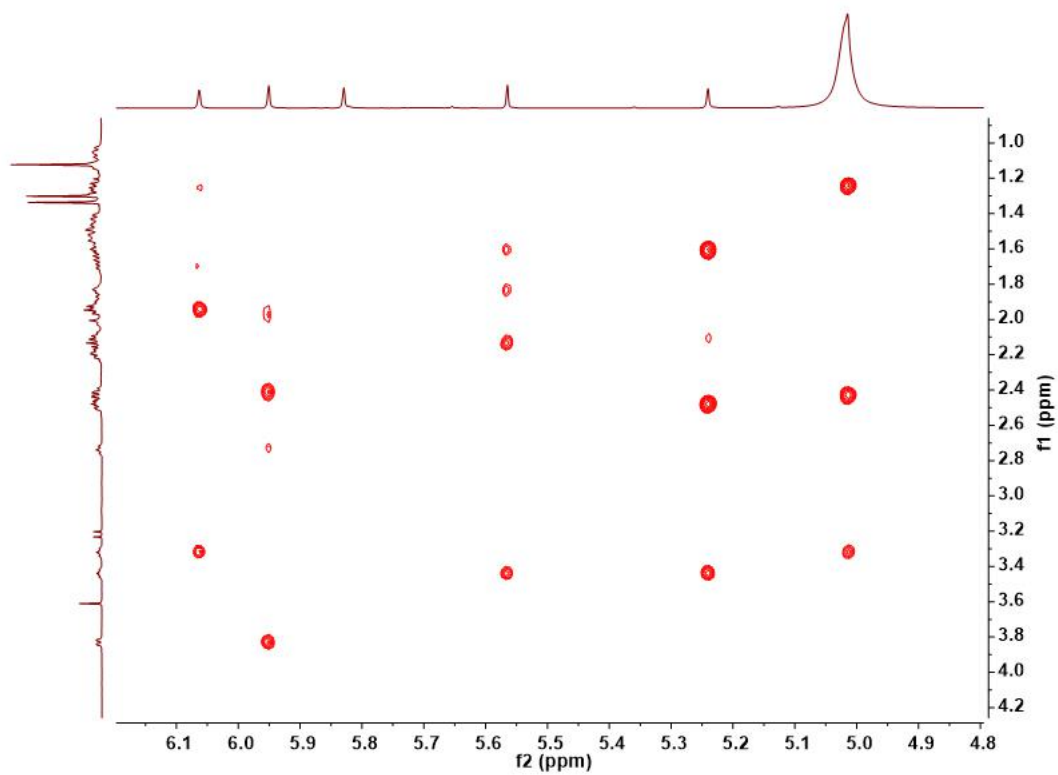

**Figure S85.** Enlarged ROESY (600 MHz) spectrum of **4** in pyridine-*d*<sub>5</sub>

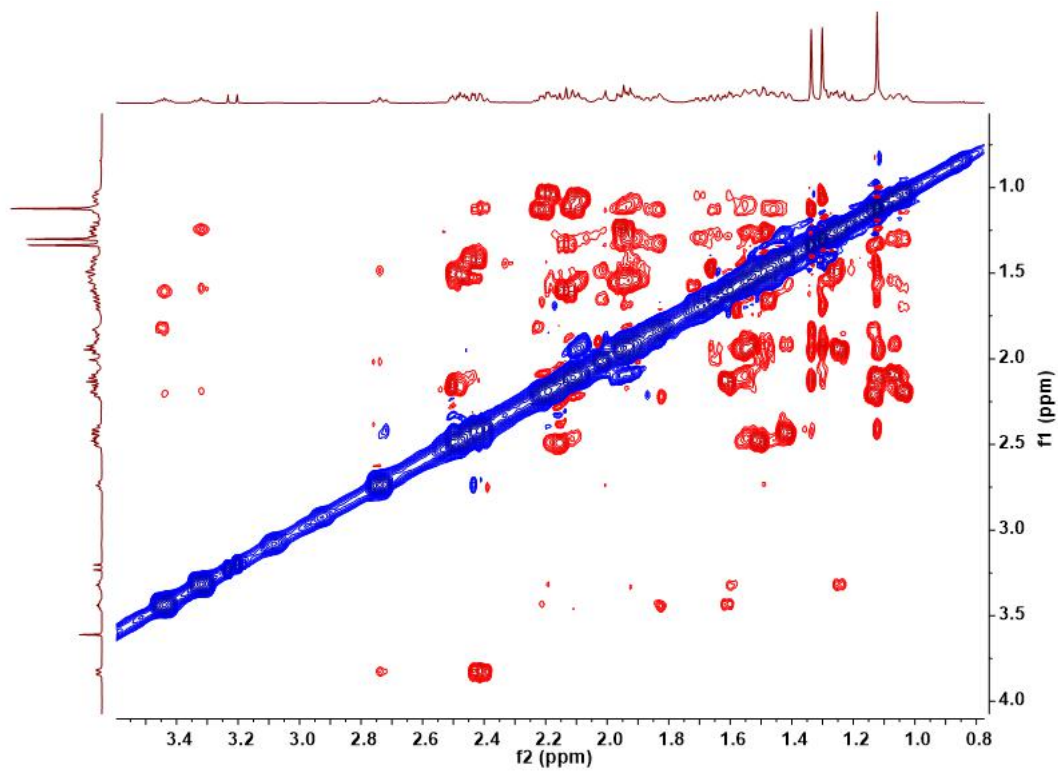

**Figure S86.** Enlarged ROESY (600 MHz) spectrum of **4** in pyridine-*d*<sub>5</sub>

## Single Mass Analysis

Tolerance = 5.0 PPM / DBE: min = -1.5, max = 50.0

Element prediction: Off

Number of isotope peaks used for i-FIT = 3

Monoisotopic Mass, Even Electron Ions

115 formula(e) evaluated with 1 results within limits (up to 50 closest results for each mass)

Elements Used:

C: 43-43 H: 0-80 N: 0-5 O: 0-10 Na: 0-1

HCX-52 281 (1.570)

1: TOF MS ES+

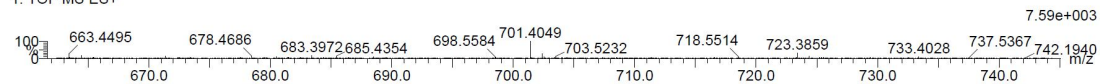

Minimum: -1.5  
Maximum: 20.0 5.0 50.0

| Mass     | Calc. Mass | mDa  | PPM  | DBE  | i-FIT | Norm | Conf(%) | Formula    |
|----------|------------|------|------|------|-------|------|---------|------------|
| 701.4049 | 701.4053   | -0.4 | -0.6 | 15.5 | 314.1 | n/a  | n/a     | C43 H57 O8 |

Figure S87. HRESIMS of 4

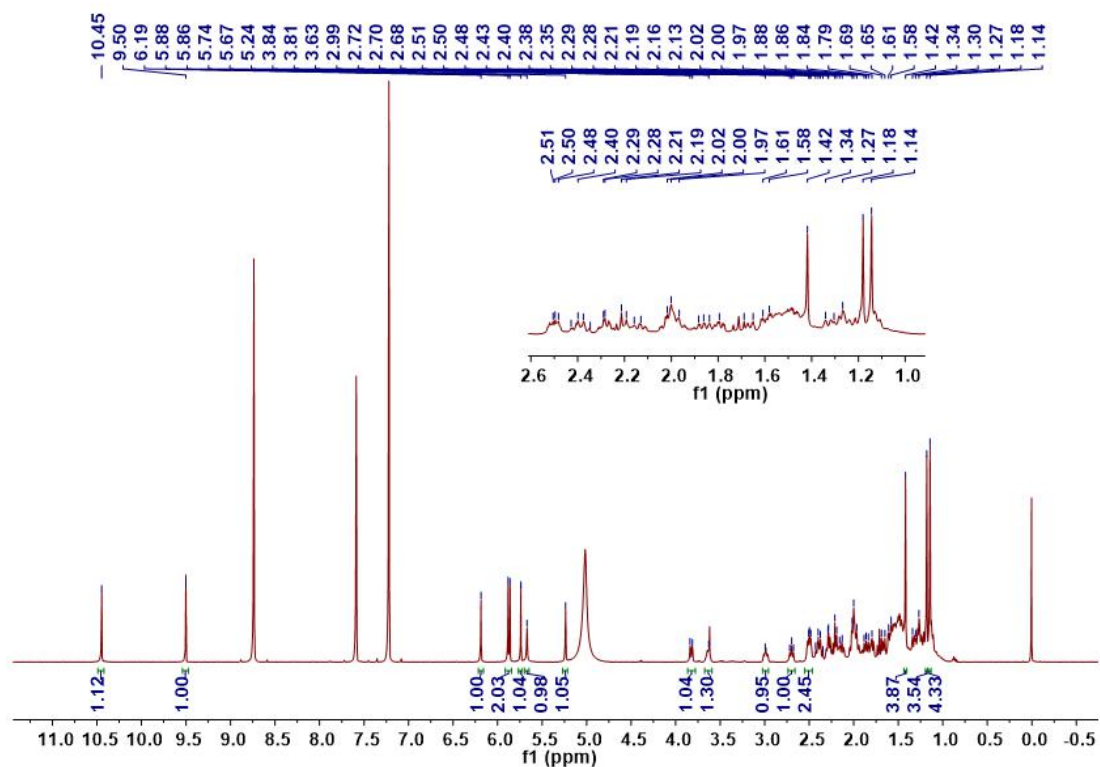Figure S88.  $^1\text{H}$  NMR (600 MHz) spectrum of 5 in pyridine- $d_5$

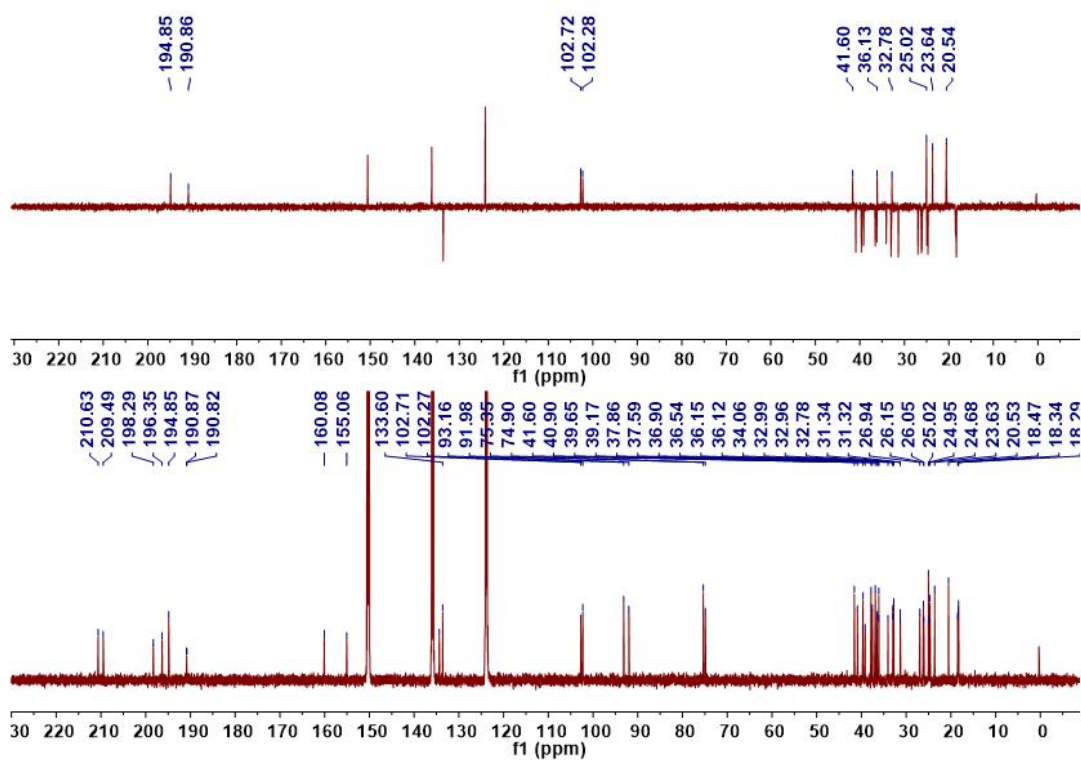

Figure S89.  $^{13}\text{C}$  NMR and DEPT (150 MHz) spectra of **5** in pyridine- $d_5$

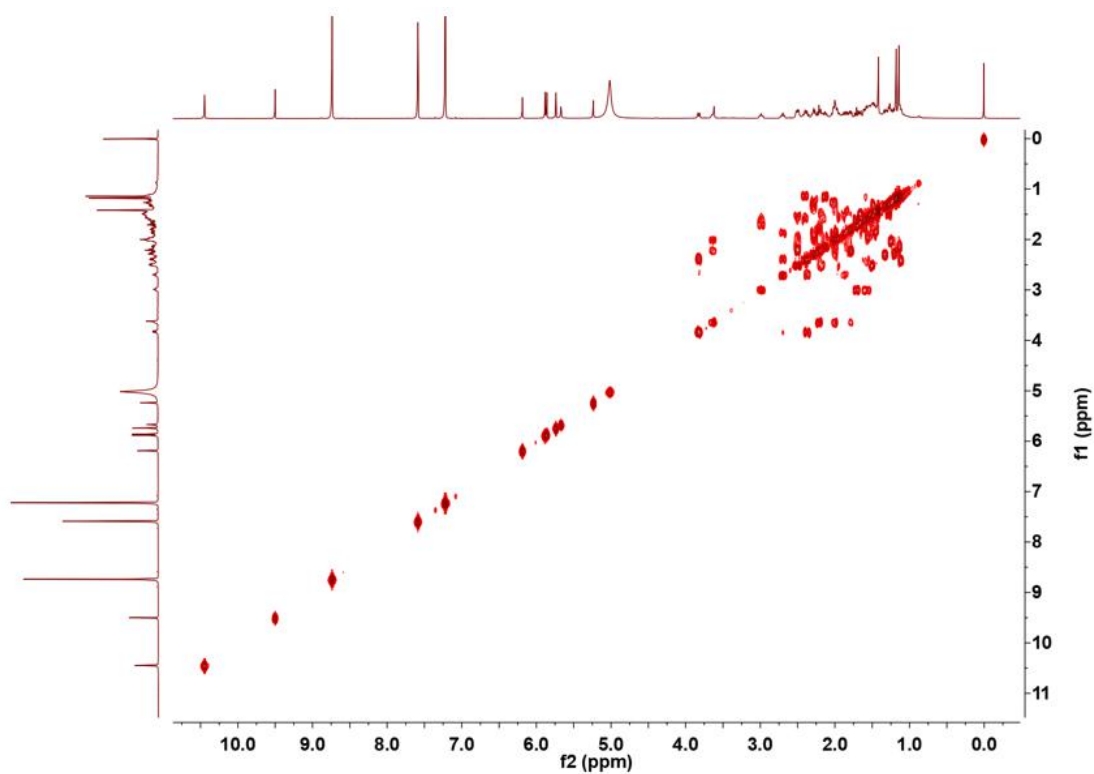

Figure S90.  $^1\text{H}$ - $^1\text{H}$  COSY (600 MHz) spectrum of **5** in pyridine- $d_5$



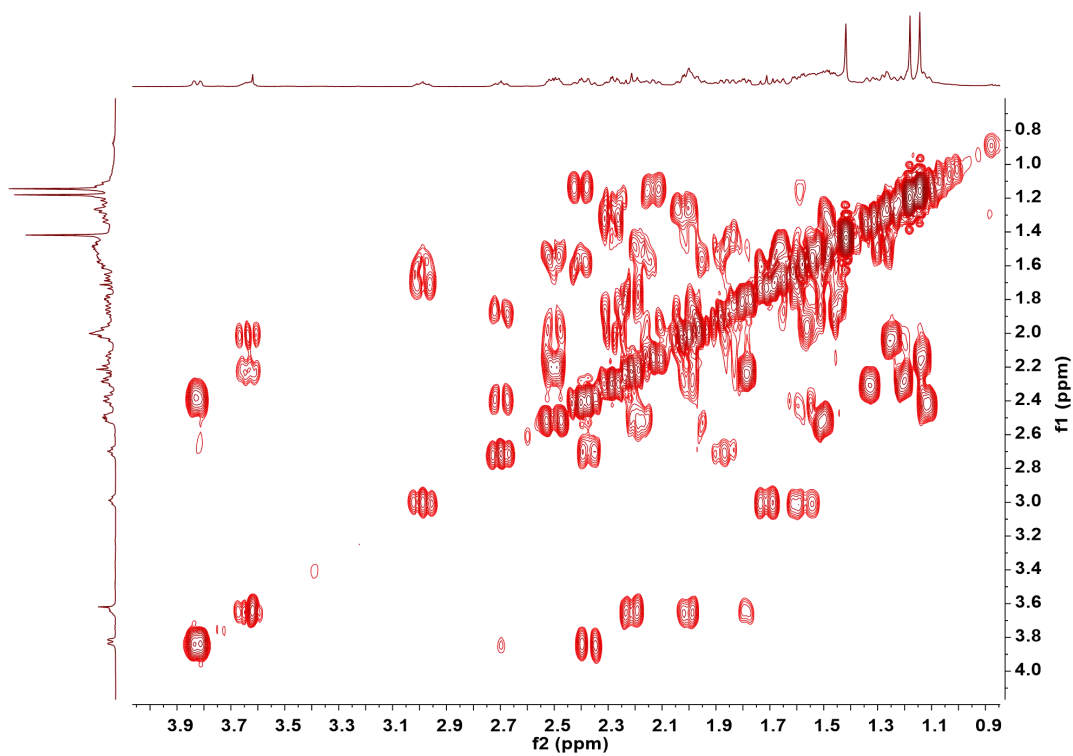

**Figure S91.** Enlarged  $^1\text{H}$ - $^1\text{H}$  COSY (600 MHz) spectrum of **5** in pyridine- $d_5$

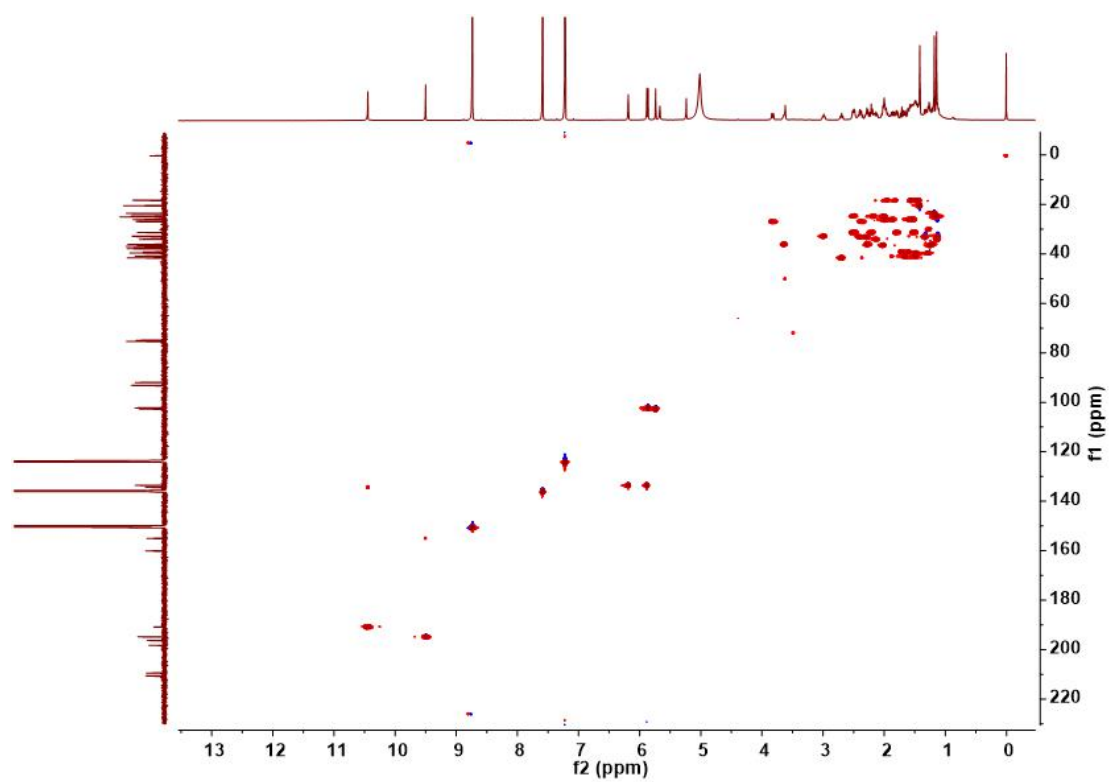

**Figure S92.** HSQC (600 MHz) spectrum of **5** in pyridine- $d_5$

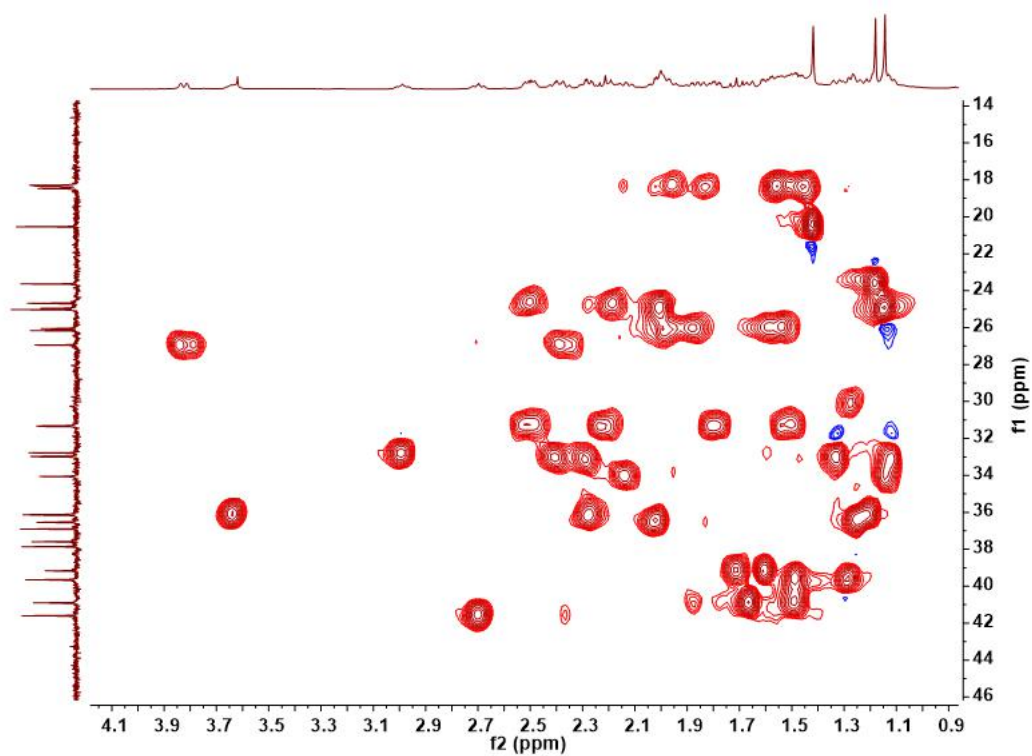

Figure S93. Enlarged HSQC (600 MHz) spectrum of **5** in pyridine-*d*<sub>5</sub>

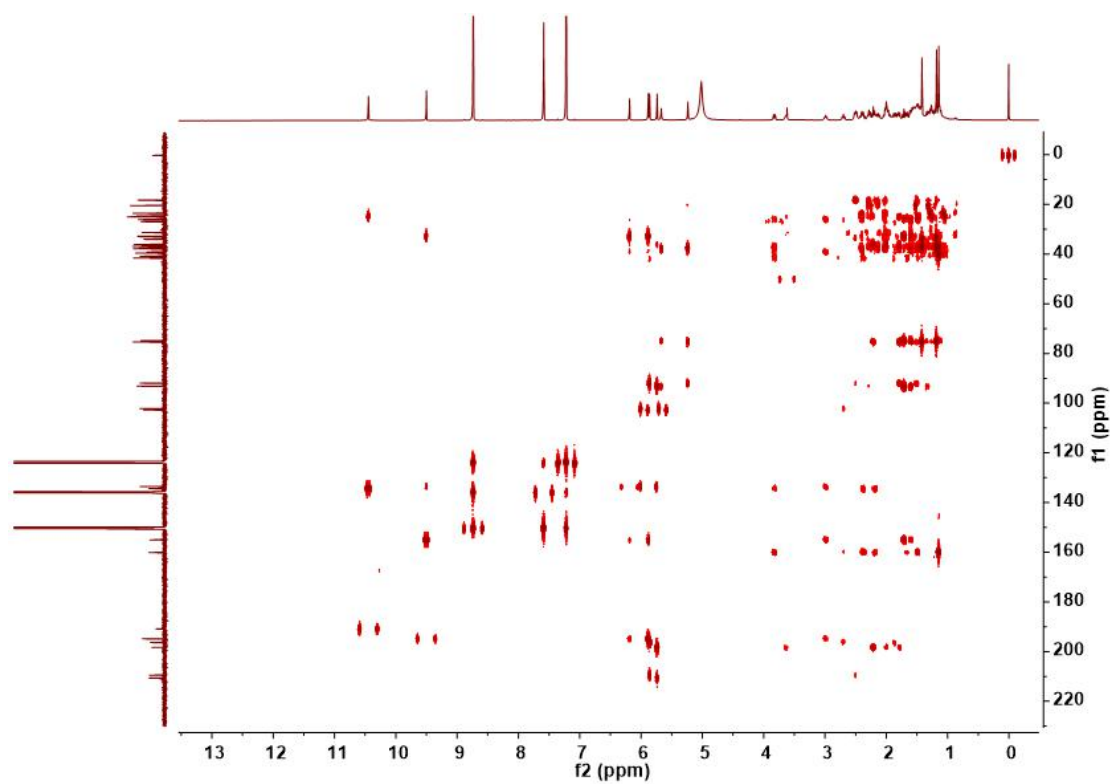

Figure S94. HMBC (600 MHz) spectrum of **5** in pyridine-*d*<sub>5</sub>

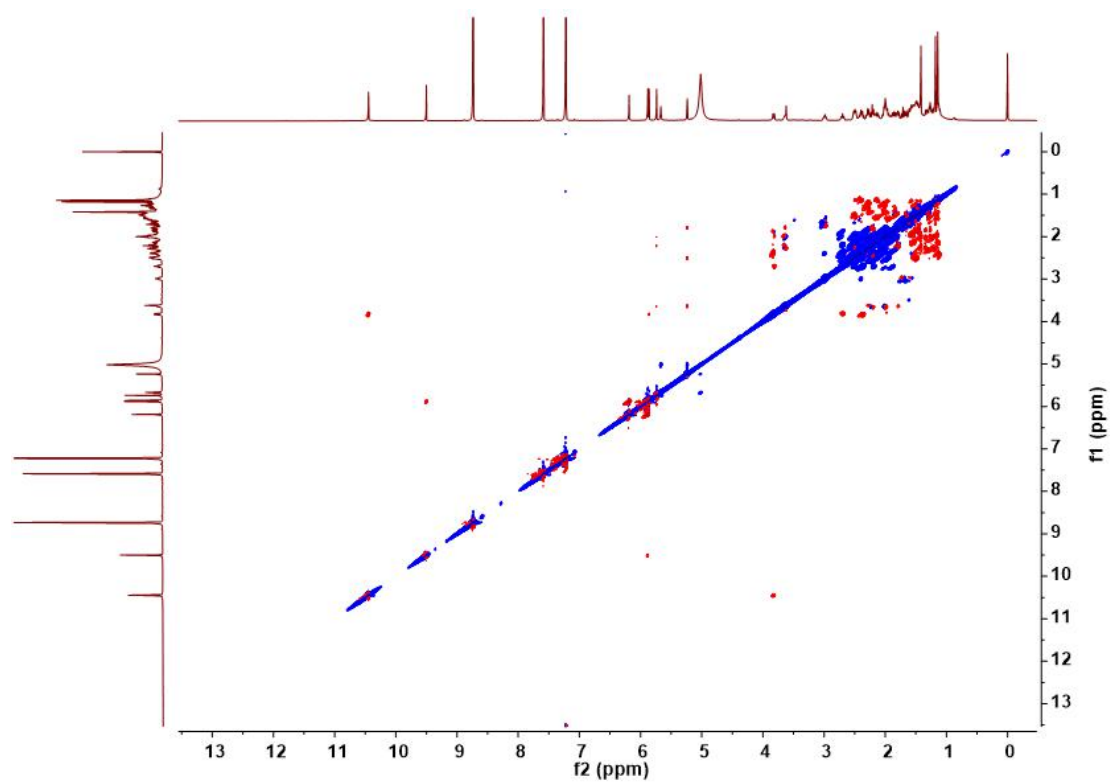

**Figure S95.** ROESY (600 MHz) spectrum of **5** in pyridine-*d*<sub>5</sub>

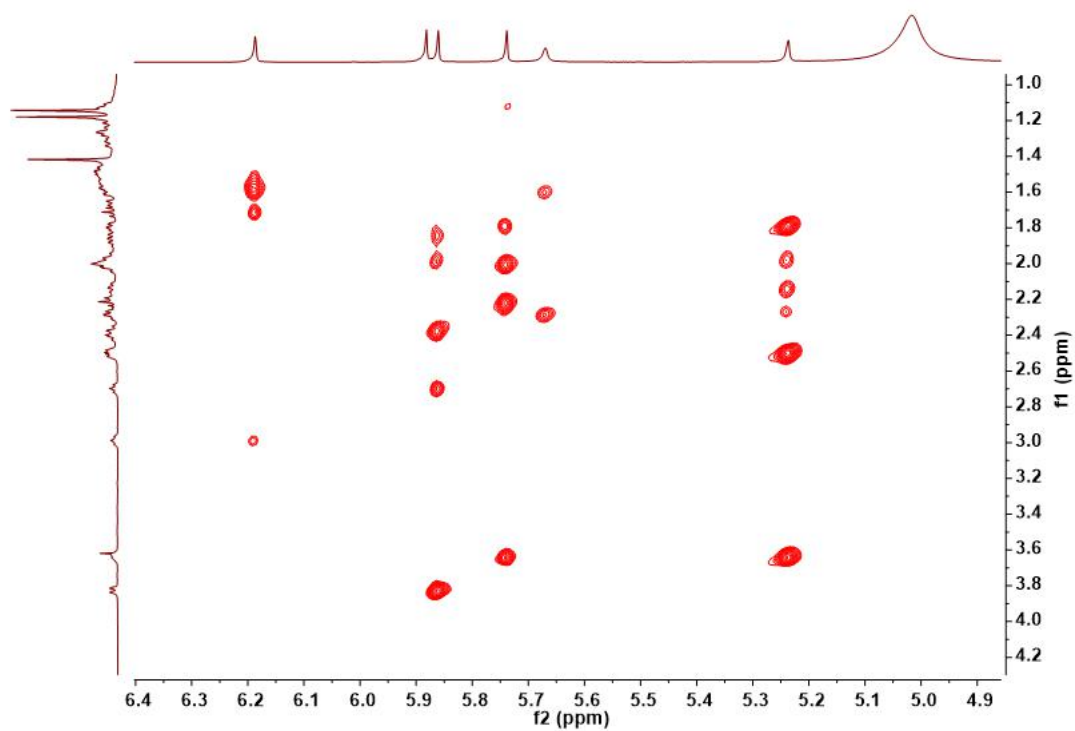

**Figure S96.** Enlarged ROESY (600 MHz) spectrum of **5** in pyridine-*d*<sub>5</sub>

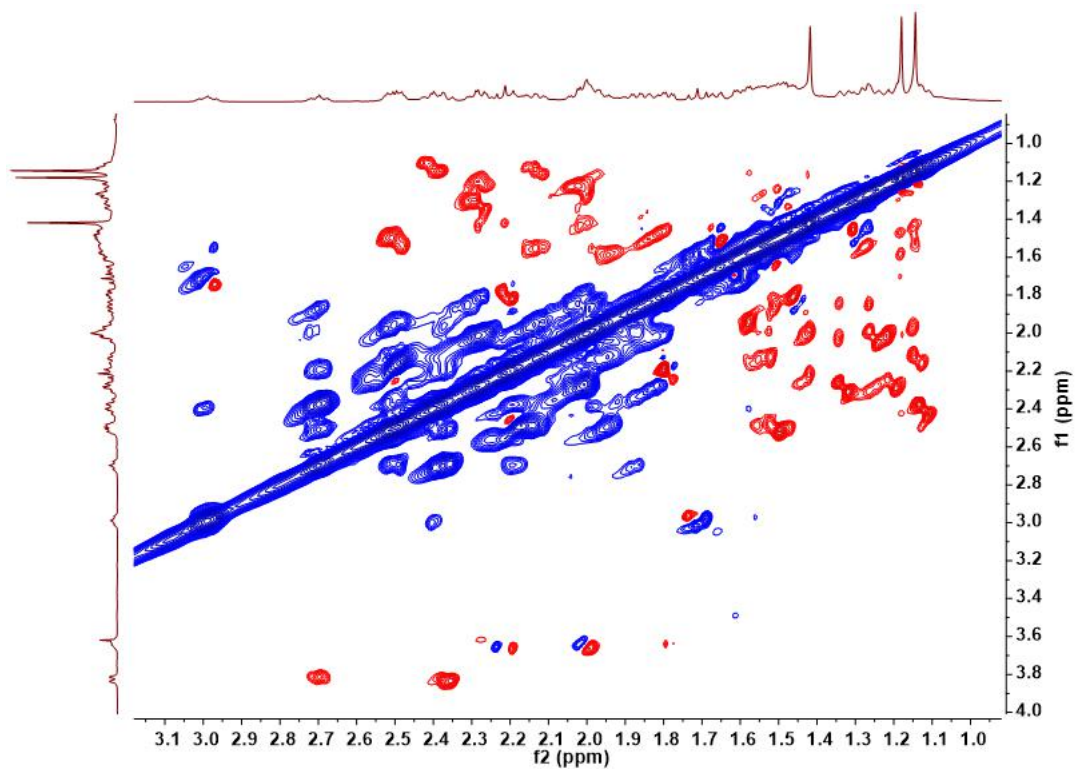

**Figure S97.** Enlarged ROESY (600 MHz) spectrum of **5** in pyridine-*d*<sub>5</sub>

**Elemental Composition Report**

Page 1

**Single Mass Analysis**

Tolerance = 5.0 PPM / DBE: min = -1.5, max = 50.0

Element prediction: Off

Number of isotope peaks used for i-FIT = 3

Monoisotopic Mass, Even Electron Ions

114 formula(e) evaluated with 1 results within limits (up to 50 closest results for each mass)

Elements Used:

C: 43-43 H: 0-80 N: 0-5 O: 0-10 Na: 0-1

HCX-53 115 (0.652)

1: TOF MS ES+

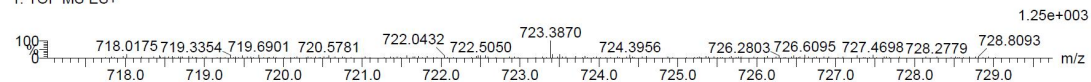

Minimum: -1.5  
Maximum: 50.0

| Mass     | Calc. Mass | mDa  | PPM  | DBE  | i-FIT | Norm | Conf(%) | Formula       |
|----------|------------|------|------|------|-------|------|---------|---------------|
| 723.3870 | 723.3873   | -0.3 | -0.4 | 15.5 | 316.1 | n/a  | n/a     | C43 H56 O8 Na |

**Figure S98.** HRESIMS of **5**

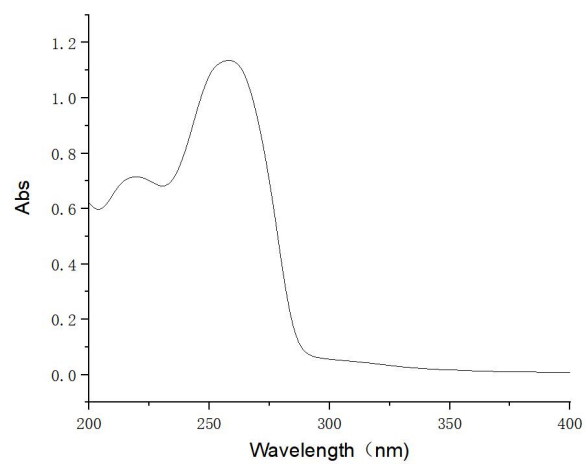

**Figure S99.** The UV spectrum of **1**

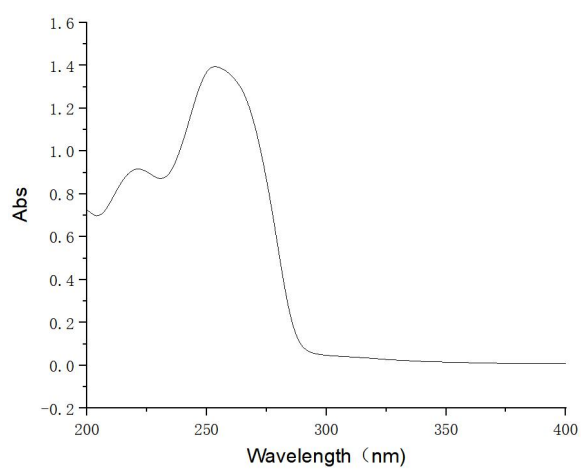

**Figure S100.** The UV spectrum of **2**

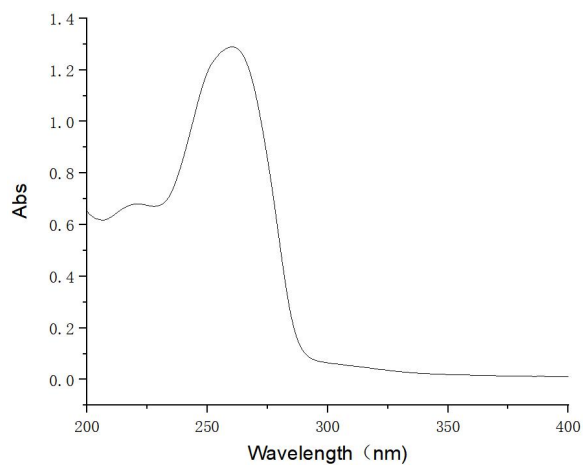

**Figure S101.** The UV spectrum of **3**

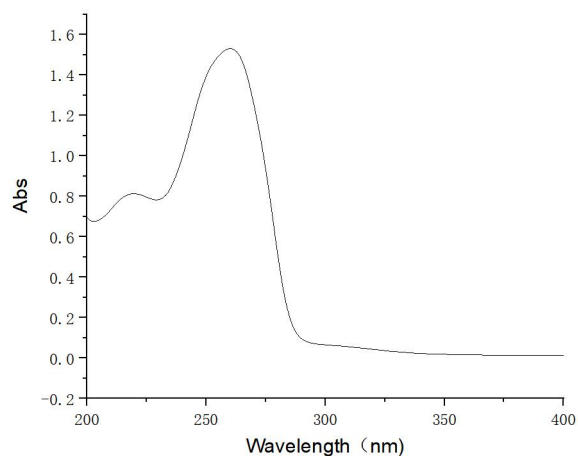

**Figure S102.** The UV spectrum of **4**

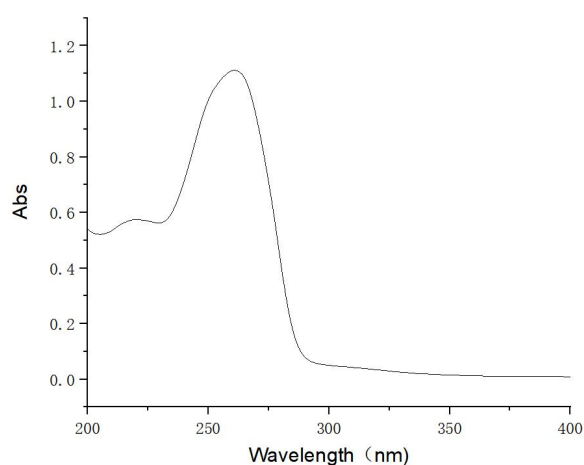

**Figure S103.** The UV spectrum of **5**

## Biological Assays

### Cell culture

RAW264.7, a mouse macrophage line (Procell life science & technology Co., Wuhan, China), was cultured in high-glucose DMEM (C11995500BT, Gibco) supplemented with 10% fetal bovine serum (FBS) (2094468CP, Gibco), 100 U/mL penicillin and 100  $\mu$ g/mL streptomycin at 37 °C in a humidified environment containing 5% CO<sub>2</sub>.

### Cell viability assay

RAW264.7 ( $2 \times 10^4$  cells/mL) were seeded into 96-well plates with completed DMEM. After overnight culture, cells were treated with various concentrations of compound or DMSO for 24 h. Then Cell Count Kit-8 (CCK-8, Beyotime, Shanghai, China) was added into each well for 1 h at 37 °C. The absorbance of each well was recorded at 450 nm using a microplate reader (BioTek, USA).

### **ELISA of TNF- $\alpha$ and IL-6**

The culture supernatants were collected and centrifuged from treated cells. The concentrations of TNF- $\alpha$  and IL-6 were measured using the ELISA Kit (Proteintech, USA) according to the manufacturer's instructions.

### **Determination of nitrite oxide**

The production of nitrite oxide was measured using the Griess Kit (Beyotime, Shanghai, China) according to the manufacturer's instructions. In short, 50  $\mu$ L of the cell supernatants were mixed with 50  $\mu$ L Griess reagent I and II, then the absorbance at 560 nm wavelength was measured using a microplate reader (BioTek, USA).

### **Western blot**

After lipopolysaccharide (LPS) treatment, total protein was extracted from the cell lines using radioimmunoprecipitation assay (RIPA) buffer (Beyotime, China) containing protease cocktail (Roche, Germany) and quantified protein samples using the BCA assay (Thermo Scientific, USA). Equal amounts of protein extracts were separated by 10% SDS-PAGE and transferred to PVDF membranes. The membranes were blocked with 5% BSA, then with the indicated antibodies overnight at 4 °C, and followed the incubation with horseradish peroxidase (HRP)-conjugated secondary antibody at room temperature. The bands were visualized and measured via the ECL kit (Pierce, USA) and analysis system (Bio-Rad, CA, USA). The densitometry analysis of the immunoblots results was performed using ImageJ software (NIH, USA).

### **Statistical analysis**

All experimental data obtained from this study were performed in triplicate. The results were represented Mean $\pm$  SEM. Statistical analyses were performed by Graphpad prism 6 (GraphPad Software, San Diego, CA, USA) and Excel (Microsoft) with Student's *t*-test, one-way ANOVA test. Differences were considered significant when  $*P \leq 0.05$ ,  $**P \leq 0.01$ , and  $***P \leq 0.001$ .

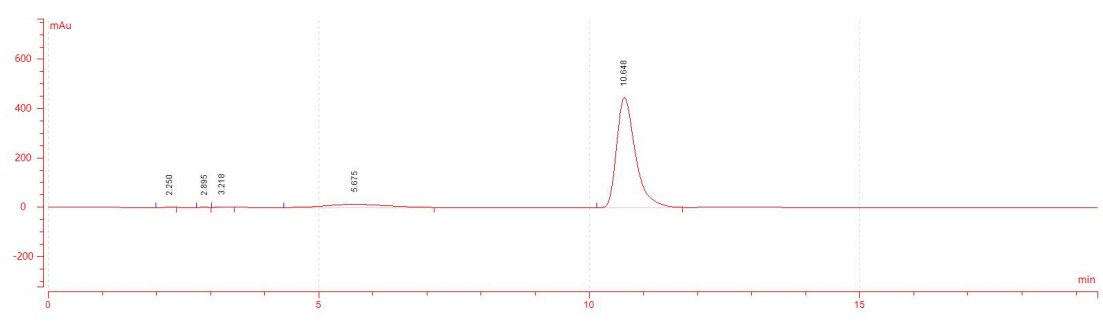

**Figure S104.** The chiral HPLC analysis of **1** by Lux Cellulose-1 column. (250 mm × 4.6 mm, i.d., 5 μm) Analysis condition: aqueous MeCN 75% (flow rate: 1 mL/min).

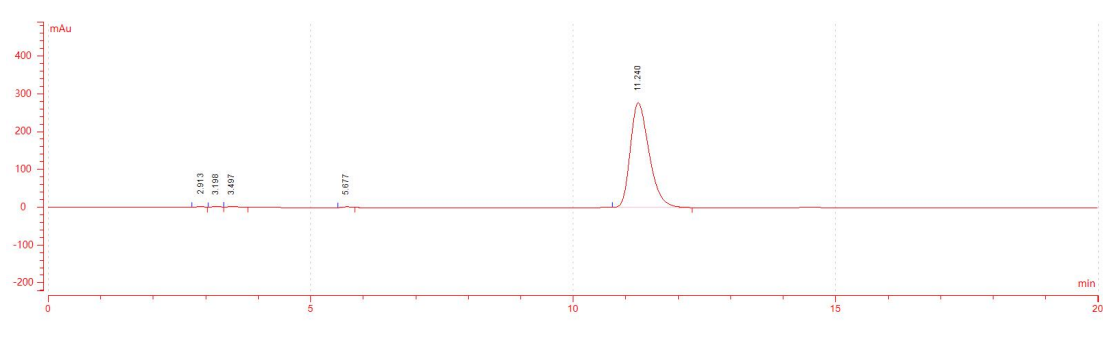

**Figure S105.** The chiral HPLC analysis of **2** by Lux Cellulose-1 column. (250 mm × 4.6 mm, i.d., 5 μm) Analysis condition: aqueous MeCN 75% (flow rate: 1 mL/min).

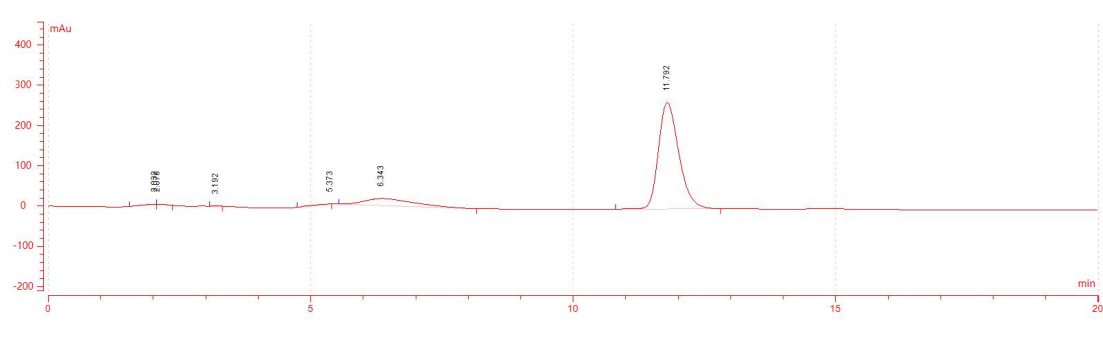

**Figure S106.** The chiral HPLC analysis of **3** by Lux Cellulose-1 column. (250 mm × 4.6 mm, i.d., 5 μm) Analysis condition: aqueous MeCN 80% (flow rate: 1 mL/min).

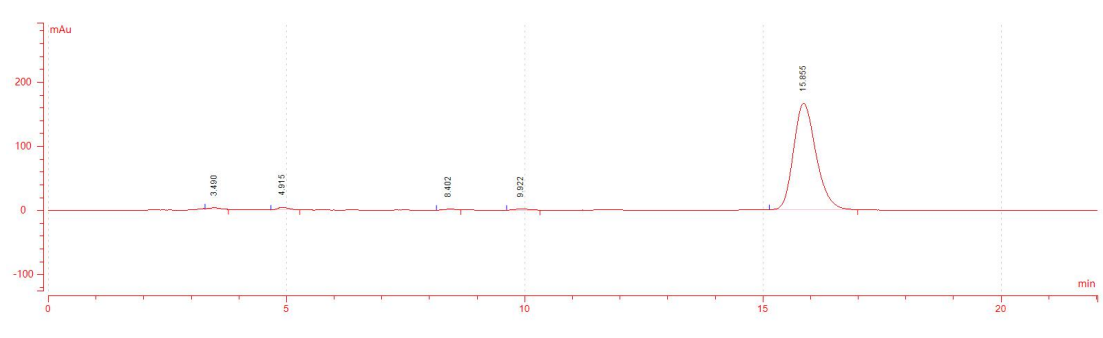

**Figure S107.** The chiral HPLC analysis of **4** by Lux Cellulose-1 column. (250 mm × 4.6 mm, i.d., 5 μm) Analysis condition: aqueous MeCN 80% (flow rate: 1 mL/min).



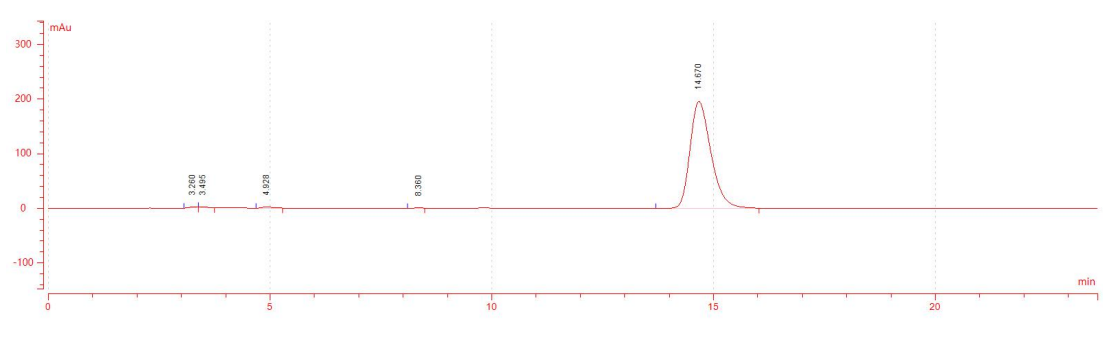

**Figure S108.** The chiral HPLC analysis of **5** by Lux Cellulose-1 column. (250 mm × 4.6 mm, i.d., 5 μm) Analysis condition: aqueous MeCN 80% (flow rate: 1 mL/min).
